# Supplementary material for: Energetic Frustration Dictates Cognate Specificity of Two-Component Signaling System
Source: Research Square preprint supplement (doi:10.21203/rs.3.rs-7586528/v1), 2025-10-31
Supplement: Supplementary file 1 [file 6d6045236c1011bef5b70f2b.xlsx]

## Sheet: FBS
ID	Sequence_ID
1	MKSILVVDDSETLRKIITFALESEGYTVTLAKNGKEALEKLKEFLPDLIIVDLRMPLMNGFELLKILKNDEELKKIPVVVISLDRSPEVEEKALKAGANAYIPKPFSIEELMKVIKKLLN
2	MKTILLVDDSETLRKIISFALEKEGYKVIFAPNGVEALKKLEEFLPDLIIVDLNMPLMNGYELLKILKNDEKLKNIPVVVLSTDSDPEVKERCLKLGANAYIEKPFSIEELIKVVKKLLN
3	MKSILLVDDSETLSKVIKFALESKGYKVVLAKNGKEALEKLEKFLPDLIILDLNMPPMNGYEILKILKNNEKLKEIPVIVVSADSSPEVKERALELGADKYIPKPFSIKELMEVVEELLN
4	MKSVLVVDDSETLRKIITFAIEKEGYKVVLAKNGIEALKKLEKFLPDLIIVDLSMRPMNGLELLKILKEDEKLKKIPVVVISGDRDPEVKKRCLELGADKYVPKPFSIKELMEIIKKLLN
5	MKKILLVDDSETLRKIIEFALKSEGYEVVRAKNGKEALEKLKEFLPDLIIVDLRMPPMNGLELLKILKNNEELKKIPVIVLSGDRTEEVKEKALELGANLYIPKPFSIEELMKKVKELLN
6	MKTILLVDDSETLGKIISFALESRGYKVVFAKNGKEALEKLKEFLPDLIIVDLRMPPMNGLELLKILKNNEELKKIPVVVLSADRDPEVEERCLEAGADAYIPKPFSIKELMEVVEKLLN
7	MKSILVVDDSETLNKIITFALESKGYTVTLAPNGKEALEKLKKSLPDLIICDLSMPPMNGFELLKILKNDPKLKKIPVVVLSLDRSPEVEKKCLEAGANAYVPKPFSIKELMEIIEKLLN
8	MKSVLLVDDSETLNKIISFALEKEGYTVTLAPNGRAALEKLKESTPDLIIVDLSMPIMDGFELLRILKEDPELRKVPVIVLSGNRDEEVKEEALELGANAYIPKPFSIEELMKVAKKLLN
9	MKSILLVDDDETLRKIISFALEKRGYSVVFAPNGIEALKKLKEFLPDLIIVDLSMRPMNGLELLKILKEDEELKKIPVIVLSKNRDPEVEKRCLEAGADKYIPKPFSIKELMEVVEKLLN
10	MKSILLVDDSETLRKIISFALESEGYKVIFAPNGIEALKKLEKELPDLIIVDLSMPPMNGLELLKILKNDEKLKKIPVIVLSADRSPETEKKCLEAGADAYIPKPFSIKELMEVVKKLLN
11	MKSVLLVDDSETLSKIISFALESRGYTVIRAPNGIEALEKLKEFLPDLIIVDLSMPPMNGFELLKILKEDEKLKKIPVIVLSKDRSEEVKQKALELGADAYVPKPFSISELMEIAEKMLN
12	MKKILLVDDSEVLRKIISFALKSEGWEVIYAPNGKEALEKLKEFTPDLIILDLRMPPMNGFEVLKILKNDEKLKKIPVIVLSGDRDPEVEEKALELGANKYVPKPFSIEELIKIAKELLE
13	MKSVLLVDDSETLRKIISFALESKGYTVVFARNGKEALEKLKEFLPDLIICDLSMRPMNGLELLKILKENEELKNIPVIVLSGDRSEEVKEKCLEAGADYYIPKPFSIEELIKVAEKLLN
14	MKTVLVVDDSETLRKIITFSLEKEGLKTIEAPNGKAALEKLKKFLPDLIIVDLSMPPMNGFELLEKLKNDPELKKVPVVVISRNSDPEVEEKALKAGADAYIPKPFSIKELMEVVKKLLN
15	MKKILLVDDSETLRKVISFALESEGYEVVLAPNGVEALEKLKEFLPDLIIVDLKMPPMDGFELLRILAEDPERRKIPVVVLSLDRTPEVKEEALKLGANAYVPKPFSIKELMEIIKELLN
16	MKSVLLVDDSETLRKIISFALESEGYTVTLAPDGIEALEKLKEFLPDLIIVDLRMPKMDGFELLRILKNDEKLRKVPVVVISLDRDPEVEERALEAGADAYVPKPFSIKELMEIVKKLLN
17	MKTVLLVDDSETLRKVIKFAIEKEGYSVIEAPNGVEALKKLEEFLPDLIIVDLSMPKMNGFELLKILKENEKLRKIPVIVLSRDRSPEVEKRCLELGADKYIPKPFSIEELMKEIKKLLN
18	MKSILLVDDSETLSKIISFAIEKEGYTVKRAKNGKEALEKLKEFLPDLIIVDLSMPLMNGYELLKKLKNDEELKNIPVIVLSLDRTPEVEEKALKLGADKYVPKPFSIEELMKIIKELLN
19	MKKILLVDDSETLRKIISFSLKSEGYEVIFAPDGVEALEKLKEFLPDLIIVDLSMPKMNGFELLKILKNDEKLRKIPVIVLSGDRSPEVEKRALEAGANAYIPKPFSIKELIEVVKKLLN
20	MKKVLLVDDSETLRKVISFALESRGYSVVFAPNGIEALKKLEKFLPDLIIVDLRMPPMNGRELLRILKNNPELRKIPVVVLSLDRDPEVEKEALELGADAYVPKPFSIEELMEVVERLLN
21	MKSILLVDDSETLQKIISFALESEGYKVIRAPNGIEALEKLKEFLPDLIIVDLRMRPMNGYELLKILKEDEELKKIPVIVLSGDRDPEVEKRALELGADAYIPKPFSISELMKVVKKMLE
22	MKSVLLVDDSETLRKIISFALKKEGYTVIYAPNGIEALEKLKEFTPDLIIVDLSMPPMNGKELLKILKENEELKNIPVIVLSGDSSPEVEKEALELGADYYISKPFSIKELIEVAKKLLN
23	MKSVLLVDDSETLNKIITFALESEGYTVTLAKNGIEALKKLEKFLPDLIIVDLSMPPMNGYELLKILKNDEKLKNIPVVVLSADRSPEVKERCLELGANAYIPKPFSIKELMEVVKKLLN
24	MKKVLLVDDSETLRKIISFALEKEGYKVIYAKDGIEALKKLEEFLPDLIIVDLSMPKMNGEELLKILKEDPKLKEIPVVVLSKNRDPEVEKRCLELGANKYIPKPFSIKELMKVVKELLN
25	MKKILLVDDSETLRKIISFALESEGYKVIFAPNGIEALKKLEEELPDLIIVDLNMPPMDGFELLKKLKEDEKLKEIPVVVLSADSSEEVKKRCLELGANAYVEKPFSIEELMEIVKKLLE
26	MKSILLVDDSETLSKIISFGLESKGYKVILAPNGIEALKKLEEFLPDLIIVDLNMPPMDGFELLKKLKEDEKLKKIPVVVLSLDRDPEVEKRALELGADAYIPKPFSIKELMEVVEKLLN
27	MKSVLLVDDSEVLSKVISFALESRGLSVIRAKNGKEALEKLKEFLPDLIIVDLRMPIMDGYELLKILKNNPELKKIPVIVLSGNRDPEEEKRALELGADKYVPKPFSIEELMKIVEELLN
28	MKSVLLVDDSETLRKVISFALEKEGYSVIYAKNGKEALEKLKESLPDLIIVDLSMPPMNGFELLKILKNDEKLKEIPVIVLSANRDPEVEKKALELGANKYIPKPFSISELMEVAKELLN
29	MKSVLLVDDSETLTKVISFALKSEGLTVIKAPNGKEALEKLKKSLPDLIIVDLRMPPMNGYELLKILKEDEKLKKIPVVVLSGDRSEETKERALKLGANKYIPKPFSISELMKVVKELLT
30	MKSVLLVDDSETMSKIISFALKSEGYSVVLAKNGKEALEKLEKFLPDLIILDLNMPPMNGFEVLKILKNNEKLKEIPVIVLSLDRSEEVKQKALELGANAYVPKPFSIKELMEIVKKLLS
31	MKSVLVVDDSETLRKVITFALEKEGYKVVLAKNGKEALEKLKKFLPDLIILDLEMPIMDGYELLKILKNNEELKKIPVIVLSRNRDPEVEKKCLELGANYYIPKPFSISELLEVAKKLLE
32	MKSVLLVDDSETLQKIISFGLEKEGYKVIFAKNGIEALKKLEEFTPDLIIVDLNMPPMNGFELLKILKNNPKLKKIPVIVLSADESEEVKEKALKLGANYYVPKPFSIEELLKIAKKLLN
33	MKTVLLVDDSETLRKIISFALESEGFKVIYAKNGKEALEKLEKFLPDLIIVDLSMPPMNGFELLKILKNNEKLKKIPVIVLSTDRDPEVEKKALELGADKYIPKPFSIQELMKEVRKLLN
34	MKSVLLVDDSETLRKIITFALESEGYTVTTAPNGVEALKKLEKFLPDLIIVDLRMPVMNGLELLKILKNDEKLKKIPVIVLSGDRSPEVEKECLEAGADYYIPKPFSIKELIEVAKKLLN
35	MKKVLLVDDSETLSKVIKFALEKEGYKVILAKNGIEALEKLEKELPDLIIVDLSMPPMNGYELLKKLKEDEKLKKIPVIVLSGNRDPEVEKKCLELGANKYVPKPFSIKELMEIVKKLLN
36	MKSVLLVDDSEVMRKIITFALEKEGYKVIYAPDGKEALEKLKEFLPDLIIVDLRMPKMDGLEFLKILKNNEELKNIPVVVLSGDRDPEVEKEALEAGANAYIPKPFSIKELMKVVKKLLN
37	MKSVLLVDDSETLNKIISFALESEGYTVTLAPNGIEALKKLEKFLPDLIIVDLRMRPMNGFELLKILKNDEERKNIPVIVLSGDRSPEVKERALELGANAYVPKPFSIKELIEIAKKLLN
38	MKTVLLVDDSETLSKIISFSLEKEGYKVILAKNGKEALEKLKEFLPDLIIVDLRMPIMNGEELLRILKNDEKLRDIPVIVLSLDRDPEVEERALELGADAYVPKPFSIKELMEIAKKKLN
39	MKKILLVDDSETLNKIISFALEKEGYSVVLAKNGIEALKKLEEFLPDLIIVDLNMPPMNGFELLKILKENEELKKIPVIVLSRDRSPEVEKECLELGADAYIPKPFSIKELMEVVKKLLN
40	MKSVLLVDDSETLSKIISFALESEGYTVVLAKNGIEALKKLEKFLPDLIIVDLRMPPMNGFELLKILKNDEKLKNIPVIVLSGDRDPEVEEKALELGANKYIPKPFSIKELMEVVKKLLN
41	MKSILLVDDSETLRKIISFILEKEGYKVIYAPNGKAALEKLKKFKPDLIIVDLRMRPMNGLELLKILKNDEELKNIPVIVLSGDRSPEVEKEALELGANYYIPKPFSPKELMEVIKKLLN
42	MKKVLVVDDSETMRKVITFALEKEGLEVIEAPNGKEALEKLKKFLPDLIIVDLRMPPMNGFELLKILKEDEKLKNIPVIVLSGDRDEEVKEKCLKLGANKYIPKPFSIEELMEEVKKLLE
43	MKTVLLVDDSETLRKIIKFALESKGYKVIEAKNGKEALEKLKKFKPDLIIVDLRMPIMDGFELLKILKEDEELKNIPVIVLSADRDPEVEQRALEAGANAYIPKPFSIKELMEVVEKMLN
44	MKSILLVDDSETLSKIIKFALESEGYKVVLAKNGIEALEKLKEFLPDLIIVDLNMPLMNGFELLKILKEDEKLKEIPVVVLSLDSSPEVEQRCLEAGANKYVPKPFSIKELMEIIKELLN
45	MKTILLVDDSETLAKIISFALESKGYKVILAKNGVEALKKLEKFLPDLIIVDLRMPPMNGFELLKILKNNEELKKIPVIVLSADRDPEVEEKALELGANKYIPKPFSIKELMEVVEELLN
46	MKSVLLVDDSETLRKIIKFALEKEGYTVIEAPDGVAALEKLKEFLPDLIIVDLSMPKMNGLELLRRLKEDPELKKIPVVVLSLDRDPEVEQRCLEAGANAYVPKPFSIKELIEIVKKLLN
47	MKSILLVDDSEILRKVISFALKSEGYTVIYAKNGIEALEKLKEFLPDLIILDLSMPKMNGLEVLKILKNDEKLKNIPVIVISGNRDPEVEKEALEAGADAYVPKPFSIEELIKIIKKKLN
48	MKSVLLVDDSETLRKVIEFALKSEGYTVVRAPNGKAALEKLKEFKPDLIIVDLNMPPMNGKELLKILKEDPELKNIPVIVLSADRSPEVEKEALELGADKYVPKPFSIKELMKIAKELLN
49	MKSVLLVDDSETLRKIISFALESKGYTVTFAKNGIEALKKLEEFLPDLIIVDLNMRPMNGYELLKKLKEDPKLKEIPVIVISGDRDPEVKKRALELGADKYVPKPFSIEELMEIAEELLN
50	MKKVLLVDDSEVLRKIIKFALEKEGYEVVEAKNGKEALEKLKEFLPDLIIVDLNMPPMNGFELLKILKEDEKLKNIPVVVLSLDSDEEVKEKCLKAGANAYVPKPFSIEELMEIVKKLLN
51	MKTVLLVDDSETLRKIISFALEKEGYKVILAKNGKEALEKLEKFLPDLIIVDLSMPPMNGFELLKILKEDPKLKEIPVIVLSADTDPEVKERCLEAGANAYIPKPFSIEELMKVAKKMLN
52	MKKVLLVDDSETLRKIISFVLESEGYEVIFAKNGKEALEKLEEFLPDLIICDLRMPPMNGFELLKRLKEDEKLKKIPVIVLSGDRDPEVEQKCLELGADAYVPKPFSTSELLSIAKKLLN
53	MKSILLVDDSETLSKIISFALESKGYTVKLAPNGIEALKKLEEFLPDLIICDLSMPPMNGYELLKILKEDEKLKNIPVIVLSKNRDPEVEKRCLELGANKYIPKPFSISELMKVVEELLN
54	MKSVLLVDDSETLRKVISFALEKEGYTVTFAPDGIEALKKLKESLPDLIIVDLSMPKMNGFELLKILKNDEKLKNIPVIVLSSDRSPEVEEKALKLGANKYIPKPFSIKELMEVAKKLLN
55	MKSVLLVDDSETLRKVIKFALEKEGYTVVEAPNGVEALEKLEEFLPDLIIVDLRMPPMNGLELLKKLKEDPKLREIPVIVLSADRDPEVEERCLEAGADYYVPKPFSIKELMEVAKKLLN
56	MKSVLLVDDSETLAKIISFALESEGYSVVLAPNGKEALEKLKEFLPDLIIVDLRMPPMNGFELLEILKNDPELKKVPVIVLSRDRDPEVEERCLEAGADAYIPKPFSIKELMKVAKELLN
57	MKSVLVVDDSETLRKIITFGLEKEGLTVTLAKDGVEALKKLEKFLPDLIIVDLSMPKMDGFTLLKILKSDEELKKIPVVVVSKDTSPEVKKRCLELGADAYVPKPFSISELMKIVKKLLN
58	MKSVLVVDDSETLNKIITFALEKEGLTVTLAPNGKEALEKLKEFLPDLIIVDLSMPPMNGLELLKILKENEELKKVPVIVLSKDRSEEVKEECLKGGANAYIPKPFSIEELMKVVKELLN
59	MKSILVVDDSETLRKIITFALESEGYTVVTAPNGKAALEKLKKFLPDLIICDLRMPLMNGYELLKILKNDEKLKNIPVIVLSGDRTPEVKKRALELGANAYVPKPFSIKELMEIVKKMLN
60	MKSVLLVDDSETMSKIISFALEKEGLTVTLARNGKEALEKLKEFLPDLIILDLRMPPMNGLEVLKILKNDEKLKNIPVIVLSGDRDPEVEEECLKAGANKYIPKPFSIEELLKEVKKLLN
61	MKSILLVDDSETLRKIITFGLESEGYTVTLAPDGIAALEKLKKSLPDLIIVDLSMPKMNGYELLEILKNDEKLKNIPVIVLSLDRSPEVEEKCLKLGANKYVPKPFSIEELMEVAKELLE
62	MKSVLLVDDSETLRKVISFALEKEGLSVVLARNGREALEKLKEFLPDLIIVDLRMPPMDGFELLKILKNDPKLKEIPVVVISADTSPEVKEKCLKLGANAYVPKPFSISELMKIIKKLLN
63	MKSVLVVDDSETLRKVITFALEKEGYSVTLARNGKEALEKLKKFLPDLILVDLNMPPMNGFELLKILKNNEELKKIPVVVISRDRTPEVKKRALELGADAYVPKPFSIEELMEIVKKLLE
64	MKTVLLVDDSETMRKIISFALEKEGYKVVFAPDGIEALKKLKKFLPDLIILDLNMPKMNGFEVLKILKNDPELKKIPVIVVSTDRDPEVEKKALELGADKYVPKPFSIKELMEIVKKMLN
65	MKSVLLVDDSETLSKIISFALKSKGYTVVLAPNGVEALEKLKEFLPDLIIVDLSMPPMNGFELLKILKNNEELRNIPVIVLSGDRDPEVEKRCLELGANYYIPKPFSIKELIEVAEKLLN
66	MKSVLVVDDSETLNKVVTFALEKEGYTVTLAPDGKEALEKLKEFLPDLIIVDLDMPPMNGYELLEILKNDPELKKIPVIVLSRNRDEEVKERCLELGADAYIPKPFSIKELMEVVKKMLN
67	MKSILLVDDSETLRKIISFALEKKGYKVILAKNGIEALEKLKEFLPDLIILDLSMPPMNGFEVLKILKNDEKLKDIPVIVLSTDRDPEVKEKCLELGADKYVPKPFSIKELIEEVEKLLN
68	MKKVLLVDDSETLQKIISFALESEGYSVIRAPNGKEALKKLEEFLPDLIIVDLSMPPMNGFELLKKLKNDEKLKEIPVIVLSRDRSPEVEKKALEAGANAYVPKPFSIKELMKIAKELLE
69	MKSVLLVDDSETMQKIISFVLESKGYTVIRAKDGKEALEKLKEFLPDLIIVDLRMPKMNGFELLKILKNDEKLKNIPVIVVSLDRSPEVEEEALEAGANYYVPKPFSLQELMEIADKLLN
70	MKSILLVDDSETLRKIISFALEKEGYTVVFAPNGKEALEKLKEFLPDLIIVDLNMPPMNGKELLKILKNDEKLKKIPVIVLSLDSSPEVEKECLELGANKYVPKPFSISELMKIVKELLN
71	MKSVLLVDDSETLRKIISFALESEGLSVILAKNGKEALEKLEEFLPDLIIVDLSMPPMNGFELLKKLKNDEKLKNIPVIVLSLNRDPEVEKKCLELGANYYIPKPFSIQELMEVVKKLLN
72	MKKVLLVDDSETLSKIITFALEKEGYEVVLAPNGKAALEKLKKFTPDLIIVDLRMRPMNGLELLKILKEDEKLKKIPVIVLSADRDPEVEKRALEAGADYYIPKPFSISELMEVVKKLLN
73	MKKVLLVDDSETLRKVISFALKKEGLEVIEAPNGIEALEKLKEFLPDLIIVDLRMRPMNGFELLEILKNDPELKKIPVIVVSADSDPEVEKKALEKGANKYVPKPFSINELMKVAKELLE
74	MKTVLLVDDSETLSKIIKFALEKEGYKVILAKNGKEALEKLEKFLPDLIILDLRMPPMNGLELLKTLKNDEKLKKIPVIVLSLDRDPEVEKEALEAGANAYVPKPFSIEELMKIAKKLLN
75	MKSILVVDDSETLRKIITFALEKEGYTVTLAPNGKEALKKLEEFLPDLIIVDLDMPPMNGLELLRILKENEELKKIPVVVLSRDRSPEVEKEALEAGADAYVPKPFSIKELMEIVKKLLN
76	MKKVLLVDDSETLRKIISFALEKEGLEVIYAKDGIEALKKLEEFLPDLIIVDLNMPKMNGYELLKILKNNEKLKKIPVVVISGDSTEEVKERALKLGADKYIPKPFSIKELMKVVKELLN
77	MKKILLVDDSETLRKIISFALKSEGYEVIFAKNGIEALEKLKKFLPDLIIVDLSMPKMNGFELLKILKNDEKLKKIPVVVISGDSSEEVKKKCLELGANYYVPKPFSIEELMEIVKKLLE
78	MKSILLVDDSETLRKIIKFAIESEGYTVVEAPDGKAALEKLEKFTPDLIIVDLSMPLMDGYELLKILKEDEKLKNIPVVVISADRSPEVEKKALELGANAYIPKPFSIEELMKVIKKLLN
79	MKSVLLVDDSETLRKIISFALESRGYSVVFAPDGKEALKKLKEFTPDLIIVDLNMPPMNGFELLKILKNDEKLKNIPVLVLSLDEDEEVKERCLKLGANEYVPKPFSISELMEKVEKLLN
80	MKSVLLVDDSETMRKVISFALESKGYTVVTAPNGKEALKKLEEFLPDLIIVDLRMPPMNGFELLKILKNDEKLKNIPVIVLSADRSPEVEKKALEAGANKYIPKPFSIEELMEVAEELLN
81	MKSVLLVDDSETLRKIISFVLESEGLTVTLAPDGVAALEKLKESLPDLIIVDLRMPKMNGFELLKILKNDPELRKIPVVVLSRDRSPEVEERALEAGADKYIPKPFSTKELMKVVKELLN
82	MKSILLVDDSETLRKIISFALESKGYTVVEAPNGKEALEKLKEFLPDLIIVDLSMPPMNGFELLKILKNDEELKKIPVIVISGNRDEEVKEKALKLGANYYVPKPFSIEELIKIVEKLLN
83	MKSVLLVDDSETLRKIISFALEKEGLSVIHAKNGKEALEKLEESLPDLIICDLSMPPMNGFELLKKLKEDEELKEIPVLVLSLDRDPEVKEKALEAGADAYIPKPFSIKELMEKVKELLE
84	MKSVLVVDDSETLNKIITFGLKSKGYSVTLAKNGKEALEKLKEFLPDLIIVDLNMPIMNGYELLKILKNDEKLKKIPVIVLSLNRDPEVEEKALELGANAYVPKPFSISELMEIADKLLN
85	MKSVLLVDDSETLRKVIKFALEKEGLTVVEAPDGVAALEKLEEFLPDLILLDLRMPKMNGLELLRRLREDERLREVPVIVISGDRSPEVEEEALAAGADAYVPKPFSIQELMEIVKKLLE
86	MKSILVVDDSETLRKVITFALESRGYTTTLAKNGKEALEKLKEFLPDLIIVDLRMRPMNGFELLKILKEDEKLKNIPVIVLSRDRSPEVEKEALELGANKYIPKPFSIEELMKVVEELLN
87	MKTVLLVDDSEVLRKIIKFGLEKEGYSVIEAKNGIEALKKLKESLPDLIIVDLRMRPMDGFTLLKILKNDEKLKNIPVIVLSRDRDPEVEERALKLGADKYIPKPFSIKELLEEAKKLLN
88	MKTVLLVDDSETLSKVISFALESEGYKVILAPDGVAALEKLKEFLPDLIIVDLNMPKMNGFELLKILKNDPELKKIPVLVLSADRTPEVEKKCLELGANAYVPKPFSIKELMEIVKKLLE
89	MKKVLLVDDSETLRKIISFALEKEGYEVVYAPNGKEALEKLKEFLPDLIILDLNMPIMNGFEVLKILKNDEKLKKIPVIVLSADRDPEVEKKALELGADKYIPKPFSIEELIKVAKELLN
90	MKTVLLVDDSETLSKVISFALEKEGYKVIFAPNGKEALEKLEEFLPDLIIVDLRMPPMNGYELLKKLKEDEKLKNIPVIVLSGDRDPEVKKRCLELGANKYIPKPFSIKELIEVAKKLLN
91	MKKVLLVDDSETLRKIISFALEKEGYKVIHARNGVEALEKLKKELPDLIILDLRMPIMDGFEVLRILKEDEELKKIPVIVLSADRDPEVEEKALELGADAYVPKPFSIKELIEIAKKLLN
92	MKKVLLVDDSETLRKIISFALEKEGLSVVFAPNGKEALEKLKKFLPDLIIVDLSMPPMNGFELLKILKNDEKLKNIPVVVLSRDRSPEVEKKCLELGADKYVPKPFSIQELMEIVKELLN
93	MKSILLVDDSETLRKIIEFSLKSKGYSVVRAKDGIEALKKLEKFLPDLIICDLRMPKMNGFELLKILKENEELKKIPVVVLSGDRDPEVEKKCLELGADYYVPKPFSIKELMEVVEKLLN
94	MKSVLVVDDSKTMRKIITFALEKEGYTVVEAPNGIEALEKLKKFTPDLIIVDLRMPPMNGYELLKILKEDEELKNIPVIVLSGNRDEEVKKKALELGADKYIPKPFSIKELIEVAKKLLN
95	MKSILLVDDSETLNKIISFALESKGYTVTLAKNGIEALKKLEKFLPDLIIVDLRMPPMNGFELLKKLKENEKLRKIPVIVLSGDRSPEVEKKALEAGANYYVPKPFSISELMKIVEKLLN
96	MKSVLLVDDSETLSKVIKFALESRGYSVVLAKNGIEALEKLKKFLPDLIIVDLRMPPMNGFELLKILKNDPELRKVPVIVLSADRSPEVEKRALEAGADKYVPKPFSIKELMEIAEELLN
97	MKSVLLVDDSETLQKIISFGLESEGLSVVRAPNGVAALEKLKKFLPDLIIVDLRMPPMDGFELLKILKEDEKLKKIPVVVISGDRDEEVKQRALELGANAYVPKPFSIEELMKIVKKLLN
98	MKTVLLVDDSETLRKIISFILEKEGYKVIYAKNGREALEKLKEFRPDLIIVDLSMPPMNGFELLRILKEDPELREIPVIVLSKDRSPEVEERCLEAGADAYIPKPFSPKELLEVAKKLLN
99	MKSILLVDDSETLNKIISFALKKEGYEVKIARNGKEALEKLKEFLPDLIILDLDMPPMNGLEVLKILKEDEELKEIPVVVLSRNRDPEVEKIALEAGADKYVPKPFSIKELMKIVKELLN
100	MKSILLVDDSETLSKIISFALESKGYSVIRARNGIEALEKLKESLPDLIIVDLNMPPMNGFEFLKILKEDPKLKKIPVIVLSLDRSEEVKEKALELGANAYIPKPFSIEELMKVVEKLLN
101	MKKILLVDDSETLRKIISFGIKKKGYEVVYAKNGKEALEKLKKFTPDLIIVDLRMPPMNGLELLKILKEDPELKKIPVIVVSGDRDPEVEKLCLEAGANAYVPKPFSIEELMEIIDKLLN
102	MKKILVVDDSETLNKIITFSLKSEGYETVLAPNGIEALKKLEKFLPDLIIVDLRMPPMNGFELLKILKNNEELKNIPVIVLSKDRDPEVKKEALELGADKYVPKPFSIKELMEIVKKLLN
103	MKKVLLVDDSETLAKIISFALESKGYSVVFAPDGVEALEKLKEFLPDLIIVDLSMPKMNGFELLKVLKEDEELKKIPVVVLSGDRDPEVEKRALELGADYYIPKPFSIKELMEVVEKLLN
104	MKSVLLVDDSETLSKIISFALESKGYTVTYAKDGIEALEKLKEFLPDLIILDLSMPKMNGLEVLKTLKNDPELRNIPVVVLSANRDPEVEQRALEAGANAYVPKPFSIEELMEIVEKLLN
105	MKSILLVDDSETLNKIISFALEKEGYSVKLAKNGIEALEKLKEFLPDLIIVDLNMPLMNGFELLKILKNDPELKNIPVIVLSLDRSPEVKKKALEAGANAYIPKPFSIEELIKVVKKLLN
106	MKSVLLVDDSETLAKVISFALEREGYKVVRAPNGKEALEKLKKFLPDLIIVDLNMRPMNGFELLKILKEDEKLKNIPVIVLSGDRDPEVKEEALKLGANAYIPKPFSIKELMEVVKKLLE
107	MKSVLLVDDSKTLRKIIKFALEKRGYSVVEAPNGIEALEKLKEFLPDLIICDLSMPPMNGFELLKILKNDPELKKIPVVVLSRDSSPEVKEKALELGANAYIPKPFSIEELMEVVEKLLN
108	MKKVLLVDDSEVLRKIISFALKKEGLEVIEAPNGKEALEKLEKFLPDLIIVDLRMPPMDGFTLLKILKNDEKLKKIPVIVLSLDRDPEVEERCLEAGANAYVPKPFSIKELMEIAKKLLN
109	MKKILLVDDSETLRKVISFALKKEGYEVVEAPNGIEALKKLKEFKPDLIIVDLRMPPMDGFELLKILKEDEELKEIPVIVLSGDRDPEVEERALEAGADAYVPKPFSIQELMKIVKELLE
110	MKSILLVDDSETLQKIIKFALESKGYTVILAKDGKEALEKLKEFLPDLIIVDLRMPKMDGYELLKRLKEDEELRKIPVIVLSADRSPEVEKRALELGANAYVPKPFSIEELMEIVEKLLN
111	MKTILLVDDSKTLRKIIKFALEKEGYKVIEAEDGIEALEKLKEFLPDLIIVDLRMPKMNGLELLKKLKEDEKLKKIPVIVLSGDRDPEVEKECLEAGANAYIPKPFSIEELMKVVKKLLN
112	MKSILVVDDSETLRKVITFALEKEGYSVIEAKNGKEALEKLKKSLPDLIIVDLSMPPMNGFEFLKILKNDEKLKNIPVIVLSLDTSPEVEKKALELGANKYIPKPFSIKELIEEVKKLLN
113	MKSILLVDDSETLRKIIKFAIESKGYTVILAKNGKEALEKLKEFLPDLIICDLSMPLMNGLELLKILKEDEELKNIPVVVLSRNRDPEVEERCLELGANKYVPKPFSIKELMKVIEKLLN
114	MKTVLLVDDSETLSKIITFALESEGYKVIRARNGKEALEKLEEFLPDLIIVDLRMPIMNGLELLKVLKEDEELKKIPVIVLSGDRDPEVEQECLEAGANAYVPKPFSIQELIEIVKKLLN
115	MKSVLLVDDSETLSKIISFALKKEGYEVILAPNGIEALKKLEEFLPDLIIVDLRMRPMNGLELLKILKEDEKLKNIPVVVLSADRDPEVEQKCLELGADKYIPKPFSISELMKVVKELLN
116	MKTVLLVDDSETLRKVISFALEKKGYKVIYAPDGVEALEKLKKFLPDLIILDLRMPKMNGLEVLKILKNDEKLKNIPVIVLSLDRSPEVEQKALEAGANAYVPKPFSIEELMKIVEKLLN
117	MKSILLVDDSETLRKIISFAIESEGYKVVFAPDGIEALKKLKEFLPDLIIVDLSMPKMNGFELLKILKNNEELKKIPVIVISRDRSPEVKKRCLELGANYYIPKPFSIKELMEVIKKLLN
118	KKSILLVDDSETLSKIIKFALEKEGYSVILAKNGKEALEKLKESLPDLIIVDLRMRPMNGFELLKILKEDEKLKKIPVIVLSADRDPEVEERCLELGANYYIPKPFSIKELMEIVKKLLN
119	MKSVLLVDDSETLSKIISFALESKGYKVVLAKNGKEALEKLKEQLPDLIIVDLRMPPMDGFTLLKILAENEELRKVPVIVLSGDRDPEVEQQCLEAGANAYVPKPFSISELIEIAEKLLN
120	MKKVLLVDDSKTLRKIISFALKKEGLEVIEAEDGIEALEKLKEFLPDLIILDLNMPKMNGYELLKILKNDEKLKNIPVIVLSLDRSPEVEKKCLELGANKYIPKPFSIKELMEVVKKLLN
121	MKKILLVDDSETLRKIISFALEKEGYEVVFAKNGKEALEKLKEFLPDLIIVDLNMPPMNGFELLKILKEDEKLKEIPVVVLSRNSDPEVEKKALELGANKYVSKPFSIQELMEVVKKLLN
122	MKSILVVDDSETMRKIITFALEKKGYKVVLAKNGKEALEKLKEFLPDLIIVDLSMPPMNGFELLKILKNDEKLKNIPVIVLSGNRDPEVEEKCLKLGANKYIPKPFSIEELMKVVEELLN
123	MKSVLLVDDDETLSKIISFALESEGYTVTLAPDGVAALEKLEESTPDLIIVDLRMPKMDGLELLRRLAEDPVLREVPVIVLSADRDPEVEQEALEAGAKAYIPKPFSIKELMEVVKKLLN
124	MKSILLVDDSETLRKAISFILEKKGYSVVFAPNGKEALEKLEKFTPDLIIVDLSMPPMNGLELLKILKNNEKLKKIPVIVLSLDRSPEVKERCLEAGADAYVPKPFSPKELMEIVEKMLS
125	MKSVLLVDDSETLAKIISFALESEGYTVTLAPNGKAALEKLEKELPDLIICDLRMRPMDGFTLLKKLKEDEKLKKIPVIVLSADRSPEVEEECLKLGADAYIPKPFSIKELIEVAKKLLN
126	MKSILLVDDSETLTKIITFALESKGYTVIKAPDGKEALEKLKEFTPDLIILDLSMPKMNGLEVLKILKEDPKLKKIPVVVISKDRSPEVEQKCLEAGANAYIPKPFSIKELIKVIEKLLN
127	MKSILLVDDSETMRKIISFALKKEGYSVIEAPNGKEALEKLKKTLPDLIIVDLSMRPMNGFELLKILKNDEKLKNIPVIVVSGNRDPEVEEKCLKLGANYYIPKPFSIEELMKVVKKLLN
128	MKTVLLVDDSDVLNKIISFALEKEGYKVILAKDGKEALEKLEKFLPDLIIVDLRMPLMNGEELLKKLKEDEKLKNIPVVVLSGDRDEEVKERALELGANKYIPKPFSIKELIEVVKKLLE
129	MKKILLVDDSETLRKIIKFALEKEGYEVVEAPNGIEALEKLKEFLPDLIIVDLRMPPMNGFELLKILKNDEKLKEIPVVVLSADRDPEVEEECLELGADAYIPKPFSIKELMEVVKKLLN
130	MKKVLLVDDSEVLRKIISFALEKEGYEVVFAKNGIEALEKLKEFLPDLIILDLRMPLMNGFEVLKILKNDEKLRKIPVLVISKDRTPEVEKECLELGADAYVPKPFSIKELMEIVKKLLE
131	MKSILLVDDSETLRKIISFGIESKGYSVTLAKNGVEALKKLEKSLPDLIILDLRMPPMNGLEVLRVLKENEELAKIPVIVLSGDRSPEVEEECLAAGANKYIPKPFSIEELMKVIEELLS
132	MKSVLLVDDSETLRKVITFALEKRGYSVVTAPNGVEALEKLKEFLPDLIIVDLNMPPMDGYTLLKILKNDEKLKDIPVIVLSGDRDPEVEKRALELGANAYIPKPFSISELMKVVEKLLN
133	MKTVLLVDDSEVMSKIISFALEKEGYKVILAPDGIEALKKLEKFLPDLIIVDLSMPKMDGFTLLKILKNDEELKKIPVVVLSLDRDPEVKERCLEAGADAYVPKPFSIKELIEIVKKLLN
134	MKSVLLVDDSETLRKIIKFAIESKGYTVIEAPNGKEALEKLKEFTPDLIIVDLSMRPMNGLELLKILKNDEELKKIPVVVLSLDRDPEVEEEALKAGANAYVPKPFSIEELMKIIEKLLN
135	MKSVLLVDDSETLRKIISFALEKEGYSVIFAKNGIEALEKLKKSLPDLIIVDLNMPPMNGFELLKKLKNDEKLKKIPVIVLSRDRTPEVEKKCLELGANKYVPKPFSIKELIEIAKELLN
136	MKKVLLVDDSKTMRKIISFALKSEGLEVVEAPNGKEALEKLEKFLPDLIILDLSMPPMNGLEVLKILKNDPKLRKIPVVVLSGDRDPEVEKKALELGADKYIPKPFSIEELMKVVKELLE
137	MKKILLVDDSETLRKIISFALESRGYEVVLAKDGVEALEKLKKFTPDLIIVDLSMPKMNGFELLKILKENEKLKNIPVVVLSLDSDPEVKKKCLELGANKYIEKPFSIEELMKEVEKLLN
138	MKTILLVDDSETMRKIISFALESEGYKVIFAKDGKEALEKLKEFKPDLIIVDLRMPPMNGFELLEKLKNDEELKNIPVIVLSGDRDPEVEERALKLGANAYIPKPFSIQELIKTIKKLLN
139	MKKILVVDDSEVLNKIITFALEKEGYKTILAKNGKEALEKLKEFTPDLIIVDLSMPIMNGFELLKILKNDPKLKKIPVIVISKNRDPEVEEEALKLGADKYIPKPFSIKELMEVVKKLLN
140	MKKILLVDDSETLRKIISFALKSKGYEVILAPNGKEALEKLKKFKPDLIIVDLRMPPMDGFELLKILKNDEELKKIPVIVLSGDRDPEVEERCLELGADAYVPKPFSISELMKIVEKKLN
141	MKSVLLVDDSEVLRKIISFALEKEGWSVVFAKNGKEALEKLKEFTPDLIILDLSMPPMNGLELLKILKEDEKLKNIPVIVLSLNRDPEVEKKCLEAGADYYVPKPFSIKELIEIAKKLLN
142	MKTVLLVDDSETMSKIISFGLEKKGYKVIRAKNGIEALEKLKKFTPDLIIVDLRMPPMNGFELLKRLKNDEKLKKIPVIVLSKDRSPEVEKKCLELGADKYIPKPFSIEELMKEVEKLLN
143	MKTVLLVDDSETLRKIIKFALESRGYSVIEAKDGKEALEKLKKSLPDLIIVDLRMPKMNGFELLKILKNDEKLKNIPVVVLSLDRSPEVEEKALKLGANAYVPKPFSISELMEIVEKLLN
144	MKSILLVDDSETLRKIIEFALKSEGYTVIRAKNGIEALKKLEKFLPDLIIVDLRMPLMNGYELLKILKNNEELKKIPVIVVSRDRSPEVEKRALELGADAYIPKPFSIEELIETIKKLLE
145	MKSILLVDDSETLRKIISFALKSKGYSVIEAKDGIEALEKLKKSLPDLIIVDLRMPKMNGFELLRILKEDPKLRKIPVVVISGDRTPEVEEEALRLGADKYIPKPFSIKELMEVVEKLLN
146	MKSVLLVDDSETLAKVIKFALESKGYTVTLASNGIEALEKLKKSLPDLIIVDLSMPPMNGYELLKKLKNDPELKKIPVIVLSANRDPEVEKKCLELGANYYVPKPFSIEELMKIVEELLN
147	MKSILLVDDSETLSKIIKFALEKEGYKVVLAKNGKEALEKLKEFLPDLIILDLSMPPMNGYELLKILKEDEELKKIPVVVLSGDRDPEVEKRCLELGANKYIPKPFSIKELIEVVKKLLE
148	MKKVLLVDDSETLRKIISFALEKKGYSVVFAPNGKEALEKLKEFLPDLIIVDLRMPPMDGFTLLKILKNDEKLKNIPVIVLSGDRTPEVKERALELGANAYIPKPFSIEELMKVVEKLLN
149	MKKVLLVDDSETLTKIITFALEKEGYEVITAPNGIEALEKLKEFLPDLIIIDLRMRPMNGFELLKILKNDEELKNIPVIVISGDRDPEVKKEALEAGANYYIPKPFSISELMEVAKKLLN
150	MKKILLVDDSETLSKIISFALESKGYKVVKAKNGKEALEKLKEFLPDLIICDLSMPPMNGFELLKILKNDEKLKKIPVIVLSSDSDPEVEKKALELGADYYIPKPFSIKELMEVVEKLLN
151	MKKILLVDDSETLAKVIKFSLESEGYSVILAKNGKEALEKLKEFKPDLIIVDLRMPPMNGFELLKILKNDEELKDIPVVVISADRDPEVEEKALELGANKYVPKPFSIKELMEVIKKLLN
152	MKSVLLVDDSETLRKIISFALESEGYKVVFAPNGVAALKELEKQLPDLIILDLKMPPMNGYEVLKILKNNEELKKIPVIVLSGDRDEEVKKKALELGANKYIPKPFSIKELIEVVKKLLE
153	MKSILLVDDSKTMRKIIKFALESRGYKVIEAPNGKEALEKLKEFLPDLIILDLNMPPMNGFEVLKILKEDEELKKIPVVVLSLDRTPEVEKEALELGANAYVPKPFSIKELMEIVEKLLN
154	MKSILVVDDSKTLRKVITFALKSKGYTVIEAPNGKEALEKLEEFLPDLIILDLSMPPMNGFEVLKILKNDEKLRNIPVVVISKDRSPEVKKKCLEAGADKYVPKPFSIEELMKIVEELLN
155	MKSVLLVDDSETLSKIIKFALEKEGYKVVLAKNGKEALEKLKKFLPDLIILDLNMPPMNGLEVLKILKEDEKLKKIPVIVLSRDRDPEVEKRCLEAGANAYIPKPFSIKELMEVVKKLLN
156	MKTILLVDDSETLSKIISFALEKEGYKVILARDGVEALEKLEKFTPDLIIVDLSMPKMDGFELLKRLKNDPVLRKVPVVVLSRDRSPEVEERALEAGADAYVPKPFSIEELMKIVKEMLN
157	MKKILLVDDSETLRKVISFALKSEGYEVIEAPDGIEALEKLKKFLPDLIIIDLSMPPMNGLELLKILKNNEKLKKIPVIVLSADRSEEVKKKCLELGADYYIPKPFSIKELMEVVKKLLE
158	MKKVLVVDDSETLNKIITFAIESKGYEVILAPNGKEALEKLKEFKPDLIIVDLNMPPMNGLELLKILKNDEELKNIPVVVLSGNSDPEIKKKCLELGANKYIEKPFSIKELMEVIEKLLN
159	MKSILLVDDSETLQKVISFALEKKGYKVILAKNGIEALEKLKEFLPDLIIVDLLMPPMNGFELLKKLKNDEKLKKIPVIVLSKDRTPEVEKEALELGANKYIPKPFSIKELMEVVEELLN
160	MKSILLVDDSETLSKIISFILEKEGYTVVLAPNGKEALEKLKKFTPDLIILDLRMRPMNGFEVLKILKNDEKLKKIPVIVISADRSPEVEEKALKLGADKYIPKPFSPKELMEVVKKLLN
161	MKKILLVDDSETLQKIISFSLESEGYEVIKAKNGIEALKKLEKELPDLIIVDLSMPPMNGFELLKILKNDEKLKEIPVIVLSLDRSEEVKKECLELGADKYIPKPFSIKELMEVVKELLE
162	MKSVLVVDDSETLRKVITFALEKEGYTTILAKNGIEALEKLKEQLPDLIIVDLRMPLMNGFELLKILKEDEKLKKIPVVVISGDRDPEVEKEALEGGADAYIPKPFSIKELMEVVKKLLN
163	MKKVLLVDDSEVMAKVIKFALEKKGYKVILAPNGKEALEKLKEFLPDLIIVDLRMPPMNGFELLKILKENEKLKKIPVIVLSADRDPEVEKEALEAGANKYVPKPFSIQELMKIVEELLN
164	MKSILLVDDSETLRKIIKFGLEKKGYTVVEAKNGKEALEKLEKFLPDLIIVDLSMPPMNGFELLKKLKNDEKLKNIPVVVLSRDRDPEVEKKALELGANAYVPKPFSIEELMKIVEKLLN
165	MKSILLVDDSEVLSKIISFGLEKRGYSVIKAKNGKEALEKLKKQLPDLIIVDLSMPIMNGEELLRILKNDEKLRKIPVVVLSGDRSPEVKERALELGANAYVPKPFSISELMEIIDKLLN
166	MKKVLLVDDSETLRKVITFALESEGYEVVTAKNGIEALEKLKEFTPDLIICDLNMRPMNGFELLKILKEDEKLKNIPVIVVSGNRDPEVKEKCLKLGADKYIPKPFSISELMEVVKELLN
167	MKSILLVDDSETLRKIISFALESKGYSVVLAKDGIEALKKLEEFLPDLIIVDLDMPKMNGFELLKILRENEKLRKIPVVVLSRDRDPEVEQRALELGANAYIPKPFSITELMEVVEKLLN
168	MKSILLVDDSETLRKIITFALESKGYKVVEAPDGIEALKKLEKFKPDLIIVDLNMPKMNGFELLEKLANDEELKNIPVVVLSLDRDPEVEERALKAGANAYIPKPFSIEELMKVVEKLLN
169	MKSILVVDDSEVLNKIITFALESKGYSVTLAKDGVEALKKLEKELPDLIIVDLRMPKMNGFELLKKLKEDEELKNIPVIVLSGDRSPEVEQQCLEAGADKYIPKPFSISELMEVVDKMLN
170	MKSVLLVDDSETLRKIIKFALESKGYKVIEAKNGKEALEKLEKFLPDLIIVDLRMPPMNGYELLKILKENEELKKIPVIVLSADSSPETEKRALELGANKYIPKPFSIKELMKVAEKLLN
171	MKSILLVDDSETLRKIISFALEKEGYTVTFAPNGKEALEKLEKETPDLIIVDLRMRPMNGFELLKKLKEDEKLKKIPVVVISADRDPEVEKKALELGADKYVPKPFSIEELMKIVKELLN
172	MKSILLVDDSETLSKIITFALEKEGYTVTLAKNGIEALEKLEKFLPDLIIVDLRMPPMNGYELLKRLKEDEKLKKIPVVVLSGDRDPEVEKKALELGADAYVPKPFSIEELMKIIKKLLE
173	MKKILLVDDSETLRKIISFALEKEGYTVILAKNGKEALEKLEKFTPDLIIVDLRMPPMNGFELLKILKENPILRKIPVIVISGDSDPEVEKKCLEAGANYYVPKPFSIKELMEIVKKLLE
174	MKKVLLVDDSETLSKIIKFALEKEGYSVVLAPDGVEALEKLKEFTPDLIIVDLSMPKMNGFELLKILKNDEKLKNIPVVVLSRDRSPEVEEEALKLGADKYIPKPFSIEELMKVVKELLN
175	MKTVLLVDDSETLRKIISFALESEGYKVIFAKNGKEALEKLEKELPDLIIVDLRMPPMNGFELLKILKNDEKLKEIPVIVLSGDRSPEVEKRCLELGANAYVPKPFSIEELIKIAKKLLE
176	MKTVLLVDDSEVLRKIISFALESKGYKVILAKNGKEALEKLKEFLPDLIILDLRMPPMNGYEVLKILKNDEKLKKIPVIVLSLDRDPEVKEKALKLGANAYVPKPFSIKELLKIVEKLLN
177	MKSVLLVDDSETLSKIIKFVLEKKGYKVILAPNGIEALEKLKEFTPDLIIVDLRMRPMNGFELLKILKNDEKLKNIPVIVLSLDRDPEVEKKALELGANAYVPKPFSPKELMEIVEKLLN
178	MKTILLVDDSETLSKVISFALEKEGYKVVLAKNGKEALEKLKEFLPDLIIVDLRMPPMNGLELLKKLKNDEELKKIPVIVLSGDRTPETEQKCLEAGANKYIPKPFSIKELMEEVKKLLE
179	MKSILLVDDSETLRKIITFALEKEGYSVVLAPNGKEALKKLEEFLPDLIIVDLNMPPMNGYELLKKLKNNEELKNIPVIVLSLDRDEEVKEKCLELGADKYVPKPFSISELMKEVKKLLN
180	MKTILLVDDSETLRKIISFALEKEGYKVIFAKNGKEALEKLEEFLPDLIIVDLSMPPMNGYELLKILKNNPELRKIPVVVLSGNRDPEVEERCLKLGANKYVPKPFSIEELMKIVKELLN
181	MKTVLLVDDSETLRKIISFALESEGLKVIFAPNGIEALEKLKEFLPDLIIVDLSMPPMDGFELLKRLAEDEELRKIPVVVLSLDRDPEVEKRCLELGANAYVPKPFSIKELMEIVKKLLE
182	MKTVLLVDDSETLSKIISFALESEGYKVILAPNGKAALEKLEKELPDLIIVDLSMPPMNGYELLKKLKNDEKLKNIPVIVLSRDRDPEVEKRALELGADAYIPKPFSISELLKVAKKLLE
183	MKSVLLVDDSETERKIISFALEKEGYSVILAKNGIEALKKLEKELPDLIILDLSMRPMNGFEVLKILKEDEKLKKIPVIVLSKNRDPEVEKKCLELGANAYVPKPYSISELMEIVKKLLN
184	MKKVLLVDDSETLSKIISFALKSKGYSVVLAKNGKEALEKLKEFLPDLIIVDLSMPPMNGFELLEILKNDPKLREIPVIVLSADRSPEVEEKCLKLGANKYIPKPFSIEELIKVAEKLLN
185	MKTVLLVDDSETLSKIISFALESRGLTVIRAPDGVEALEKLREQRPDLIILDLSMPKMDGFELLRRLAEDPELREIPVVVLSADRSPEVKERALEAGARAYVPKPFSIEELMKIVEELLN
186	MKKVLLVDDSETLRKIIKFGLEKEGYEVVEAPNGVEALEKLKEFLPDLIIVDLRMPPMDGYELLKILKEDPKLREIPVIVLSLDRDPEVEKRCLEAGANAYVPKPFSIKELLEIAKKLLE
187	MKTVLLVDDSETLRKIISFALEKEGYKVIYAPNGIEALEKLKEFLPDLIIVDLRMRPMDGFTLLEILKNDEKLKKIPVIVLSADRDPEVEKRALELGADAYVPKPFSIEELIKIAKEKLE
188	MKSILLVDDSKTLSKVISFALEKEGYSVVLAPNGRAALEKLEKFLPDLIIVDLSMPPMNGFELLRKLKEDEELKKIPVVVLSLDRDPEVEEEALKAGANAYVPKPFSIKELMEIVKKLLN
189	MKKILLVDDSETLRKIISFALKSEGYEVVWAKNGIEALEKLKEFLPDLIIVDLDMPPMNGYELLKILKEDEELKKIPVVVLSRNRDPEVEQKALELGADAYVPKPFSISELIEIIKKLLN
190	MKSVLVVDDSETLRKVITFALESEGYKTVLAKNGIEALEKLKEFLPDLIIVDLDMPPMNGYELLKKLKEDPKLKEIPVIVLSRNRDPEVEKRALELGADAYVPKPFSIEELMKIAKEKLE
191	KKSVLLVDDSETLNKIISFALEKEGYSVTLAPNGIEALEKLKEFLPDLIIVDLNMPPMNGFELLKILKEDEKLKEIPVIVISGDRSPEVEEKALELGANAYIPKPFSIKELIETAKKLLN
192	MKSILLVDDSETLRKVISFALEKEGYTVVFAPDGKEALKKLEEFLPDLIICDLSMPKMNGKELLKILKNDEKLKNIPVIVISADRDPEVEKEALELGANKYIPKPFSIKELMEVAKKLLN
193	MKTILLVDDSETLRKIISFALEKKGYKVIFAPDGISALEKLKKFTPDLIILDLNMPPMNGFEVLEILKNDEKLKNIPVIVLSADRDPEVEKRALELGANAYVPKPFSIKELMEIVEKLLN
194	MKTVLLVDDSETLRKIISFALESKGYKVIYAPNGKEALEKLKEFLPDLIIVDLSMRPMNGYELLKILKNNEELKNIPVIVLSLDRDPEVEKRCLELGANYYIPKPFSISELMEVVEKLLN
195	MKSILLVDDSEVLRKIIKFALESEGYTVIEAKNGKEALEKLKKFKPDLIIVDLSMPPMNGFEFLKILKNDEELKKIPVIVLSANRDPEVEEECLKLGADYYVPKPFSIKELIEIAKKLLN
196	MKSVLLVDDSETLAKIIKFALESEGYTVKLAKNGIEALKELEKFLPDLIIVDLSMPPMNGFELLKKLKEDEKLKEIPVIVLSLNRDPEVEKKCLELGANEYIPKPFSIKELIEVVKKLLN
197	MKTILLIDDSETLRKVISFAIESEGYKVIYAPNGIEALEKLKKSLPDLIILDLRMPPMNGYEVLKILKENEKLKNIPVIVLSGDSSEEVKKKALELGANKYVVKPFSIKELMKIIKELLN
198	MKTVLLVDDSETLRKIITFALESEGYKVILAKNGKEALEKLKEFLPDLIIVDLRMPLMNGFELLKKLKEDEKLKKVPVIVLSGDRDPEVEEEALKAGANAYVPKPFSIKELMEIAKKLLN
199	MKSILLVDDSETLSKIISFALEKKGYTVIRAKNGVEALKKLEEFLPDLIILDLNMPPMNGLEVLKILKNNEKLKKIPVVVLSANRDPEVEKECLELGADKYVPKPFSISELMKIVEELLN
200	MKKILLVDDSETLRKVITFALEKEGYKVVLAPNGKEALEKLEKFLPDLIIVDLRMPPMNGYELLKKLKEDEKLKKIPVIVLSLDRDPEVKERCLKLGANAYVPKPFSIEELMKIAKKLLE
201	MKSILLVDDSEVLSKIIKFALESKGYSVVLAKNGKEALEKLEKFLPDLIIVDLEMPPMDGYTLLKILKNNEELKKIPVVVISKDRSPEVEEKALKLGANKYVPKPFSIKELMKIVEELLN
202	MKKVLLVDDSETLNKVIKFALESRGYEVVLARNGKEALEKLKEFLPDLIIVDLSMPPMDGKTLLKILKEDEELRKIPVIVLSGDRDPEVEKEALELGADAYIPKPFSIQELMKVAEELLN
203	MKSILLVDDSETLRKIISFAIKSEGYEVIYASNGKEALEKLKKSLPDLIICDLSMPIMNGFELLKILKNDEKLRKIPVVVLSADRDPEVEEECLELGADVYVPKPFSIKELMEIIKKLLN
204	MKTVLLVDDSETLQKIITFALESKGYKVIRAPDGKAALEKLKEFLPDLIIVDLSMPKMNGFELLKILKEDPELKKIPVIVLSRDRSPEVEKECLELGADAYVPKPFSIQELMKIAEKLLN
205	MKKILLVDDSKTLSKIISFALEKEGYEVVLAPNGIEALKKLEKFLPDLIIVDLLMPPMNGLELLKILKENEKLKNIPVVVLSLRRDPEVEEECLKAGANKYIPKPFSIKELMKVVKELLN
206	MKKVLLVDDSETLAKVISFALKSEGYEVVLAKNGKEALEKLKEFLPDLIIVDLSMPPMNGLELLKKLKNDEKLKKIPVVVISLDRTPEVEKEALEAGANYYIPKPFSIKELMEVVKKLLN
207	MKSILLVDDSEVLSKIISFALEKEGYSVILAPNGIEALEKLKEFLPDLIILDLNMPPMNGFEVLKILKENPELKKIPVIVLSADRDPEVEQRALELGADKYVPKPFSIQELIEIVKELLN
208	MKSVLVVDDSETLRKVITFALEKEGLTVILAKNGIEALKKLEEQLPDLIIVDLRMPPMNGFELLKILKENEELRKIPVVVLSADRSPEVEKRCLEAGADAYVPKPFSISELMEVVKKLLE
209	MKKVLVVDDSETMNKIITFALESKGYSVILAPDGEEALKKLEKELPDLIILDLRMPKMNGFELLKKLKEDEKLKEIPVIVVSGDRSPEVEKRCLELGADYYVPKPFSIKELMEIVEKLLN
210	MKRVLLVDDSETLQKIISFALEKRGYEVVRARDGVEALEKLEEFLPDLIIVDLSMPKMNGLELLRRLKNDPELRGIPVVVLSLDRDPEVEKECLEAGADAYIPKPFSIEELMKVVEELLN
211	MKTILVVDDSETLRKVITFAIEKEGYKTILAKDGIEALEKLEKQLPDLIIVDLRMPKMNGEELLKKLKEDEKLRKIPVVVLSADRDPEVEQRALELGANAYIPKPFSIKELMEVIKKLLN
212	MKSILLVDDSEVLNKIIKFAIESEGYKVILAKDGIEALKKLEEFTPDLIIVDLRMPKMNGFELLKKLKENEKLKKIPVVVISGDRSPEVEKKALELGADYYIPKPFSIKELMEIIKKLLN
213	MKKVLLVDDSETLSKIISFGLEKEGLSVVLAPDGKEALEKLKEFLPDLIIVDLRMPKMNGYELLKILKNDEKLKKIPVIVISGDTDEETKERALKLGADYYIPKPFSIEELMKVVKKLLN
214	MKKILLVDDSETLRKIISFALEKEGYEVVFAPDGIEALKKLEEFLPDLIIVDLSMPKMNGFELLEKLKNDEKLKKIPVIVLSANRDPEVEKECLELGADKYIPKPFSIKELIEVIKKLLN
215	MKSILLVDDSETLRKIISFGLESKGYKVIFAPNGKEALEKLKEFTPDLIILDLSMPPMNGFELLKILKNDPKLKNIPVIVISGDTDPEVEKKALELGANKYIPKPFSIKELMKVVEKLLN
216	MKRVLLVDDSETLQKVISFALEKKGYSVVRAKNGIEALKKLEEFLPDLIIVDLRMPPMNGFELLKILKNNEELKNIPVVVLSGDRDPEVEERALELGANKYIPKPFSIEELMEVVEELLN
217	MKKILLVDDSETLSKIISFSLKKEGYEVVLAKNGIEALEKLKEFLPDLIILDLNMRPMNGFELLKELKNDPELKNIPVIVLSKDRDPEVEKEALELGANYYVPKPFSIKELMKIVKKLLN
218	MKTVLLVDDSETLRKIIKFGLEKEGYKVVEAPDGKAALEKLKEFLPDLIIVDLRMPLMNGFELLKILKNNEKLKKIPVIVISGDRDPEVEKKALELGANAYIPKPFSIEELLKVAKKLLN
219	MKSILLVDDSEVLRKVISFALEKEGYKVIYAKNGKEALEKLKEFLPDLIILDLSMPPMNGLEVLKILKEDEELKKIPVIVLSKNRDPEVEQECLEAGADAYVPKPFSIKELMEIVKKLLE
220	MKSILLVDDSETLRKIISFALEKKGYKVIYAPNGKEALEKLKEFIPDLIIVDLNMPIMNGFELLKILKEDEKLKEIPVVVLSANRDPEVEKEALELGASKYVPKPFSIEELMKIVEELLN
221	MKKILVVDDSKTLRKIITFALKKEGYEVIEAPNGIEALKKLEKFLPDLIILDLRMPPMNGFELLEILKNNEKLKKIPVVVLSADRSPEVKKRCLELGANAYIPKPFSIKELMEVVKKLLE
222	MKSILLVDDSETLRKIISFALESEGYTVVYAKNGIEALEKLKEFLPDLIIVDLRMRPMNGYEFLKILKNDEKLKEIPVIVLSLDRTPEVEKEALELGANKYIPKPFSIKELIKEVKKLLN
223	MKKVLLVDDSETLRKIIKFALESKGYSVVLAKDGIEALEKLKKFLPDLIIVDLSMPKMDGFELLKILKNDEKLKKIPVIVLSADRDPEVEQRALEAGANAYIPKPFSIKELIEVAEKLLN
224	MKSVLLVDDSETLSKIISFILEKEGYSVVLAKNGKEALEKLKEFLPDLIIVDLKMRPMNGLELLKILKNDEKLKNIPVIVLSLDRSPEVEKLCLEAGANAYVPKPFSPKELLEIAKKLLN
225	MKSVLLVDDSETLRKIIKFALEKEGYTVTLAKNGKEALEKLEEFLPDLIIVDLSMPPMNGFELLKILKNNEKLKNIPVIVLSADSSEEVKQKCLELGADYYIEKPFSIKELMEVAKKLLN
226	MKSVLLVDDSETLRKIISFALEKKGYSVVYAPDGKAALEKLKKFLPDLIIVDLRMPLMNGFELLKILKEDPELRKVPVIVLSGDRDPEVEEEALKAGANAYVPKPFSIKELMEIVEKLLN
227	MKSVLLVDDSETLRKIIKFALEKEGLSVTLARNGKEALEKLKEFLPDLIIVDLRMRPMNGFELLKILKNDEKLKNIPVIVLSGDSSPEVKKRCLEGGANKYVTKPFSIEELMEIVKELLE
228	MKSILLVDDSETLNKIISFGLKSEGYTVTLAKNGIEALKKLKEFTPDLIILDLSMPPMNGYELLKILKNDEKLKKIPVIVLSLNRDPEVEKKALELGANAYIPKPFSIKELLKVIKKLLN
229	MKTVLLVDDSETLAKIIKFALESEGYKVVLAKNGKEALEKLKEFLPDLIIVDLSMPPMNGLELLKTLAENEELKKIPVVVISKNRDPEVEQKALEAGANAYVPKPFSIKELMEIVKKLLN
230	MKSVLLVDDSETLRKIIKFALESEGLKVIEAPNGKEALEKLKKFTPDLIIVDLRMPIMNGLELLKILKNDEKLKKIPVVVISGDSSPETKQRCLEAGADKYVEKPFSIKELMKVVKELLE
231	MKSILLVDDSETLRKIISFALEKEGYTVIHAPNGKEALEKLKKQTPDLIIVDLSMPLMNGFELLKILKNDPKLKKIPVIVLSRDTDPEVEEKALELGADAYIPKPFSISELMEVAKKLLN
232	MKKILLVDDSETLRKIIKFSLEKEGYEVVEAPNGKEALEKLKKFLPDLIIVDLSMPPMNGLELLKILKNNEKLKKIPVIVLSRNRDPEVEKKALEAGANAYIPKPFSIKELMEVVKKLLN
233	MKSILLVDDSETLNKVISFALEKEGYTVTLAPNGIEALEKLKESLPDLIIVDLRMPPMNGLELLKILKNNEKLKKIPVVVLSGDRTPEVEKKCLEAGANAYVPKPFSIKELIEIVKKLLN
234	MKSVLLVDDSETLSKIIKFALESKGYTVTLAPNGVEALEKLKKFLPDLIIVDLRMPPMDGFELLRILKNDEKLRKIPVIVLSADRSPEVEERCLELGADAYVPKPFSIEELIEIAEKLLN
235	MKKVLVVDDSETLRKIITFALEKEGYKVILAPNGKEALEKLKEFLPDLIIVDLSMPPMNGFELLEVLKNDEELKNIPVIVLSLNRDPEVEKKALELGANAYVPKPFSIEELMKIVKKLLN
236	MKTVLLVDDSETLRKIISFALESEGYKVIYAPNGIEALEKLKKFTPDLIIVDLSMRPMNGFELLKILKNDEKLKKIPVVVLSSDRSPEVEEKCLELGANKYIPKPFSIEELIEVVKELLE
237	MKSVLLVDDSKTLAKVISFALKKEGYEVVLAPDGKEALKKLEKFIPDLIIVDLSMPKMDGFELLKILKNDEKLKKVPVIVLSGDRDPEVEERALELGANAYVPKPFSISELMKIAKELLN
238	MKSILVVDDSETLRKIITFALESKGYKVVLAPNGKEALEKLKEFLPDLIIVDLNMPPMNGFELLKILKNNEELKNIPVIVLSLDRSPEVEKKALELGANAYIPKPFSIKELMEVVEKLLN
239	MKTVLLVDDSETLSKIISFALEKEGLSVIRAKDGIEALKKLKEFLPDLIICDLNMPKMNGFELLKILKNDEKLKKIPVVVLSADRSPEVEKKCLELGADKYIPKPFSIKELMEVVKELLN
240	MKSILLVDDSKTLQKIISFALEKEGYSVVLARNGKEALEKLKEFLPDLIIVDLNMPPMNGFELLRILKNDPELKKIPVIVLSLDRDPEVEKKALELGADAYIPKPFSIQELIEVVKKKLE
241	MKSVLLVDDSEVLQKVISFALEKEGYKVVLAPNGIKALEELKKFTPDLIIVDLNMPPMNGYELLRILKNDEELRKVPVVVLSADRTPEVEQRCLELGANAYIPKPFSIKELMEVVKKLLE
242	MKSVLLVDDSETLRKIISFALESEGYTVVHAPDGVAALEKLKEFLPDLIIVDLSMPKMNGLELLRILREDEKLREVPVVVLSADRDPEVEREALEAGADAYIPKPFSIEELMKVVKELLE
243	MKSVLLVDDSETMRKIISFALEKEGYSVVFAKDGKEALEKLKEFLPDLIIVDLSMPKMNGLELLKILKNNEELKKIPVIVLSLDRDPEVEKECLEAGANAYVPKPFSIEELMKIAKKLLN
244	MKSVLLVDDSETLRKIISFALESRGYTVTEAPNGKAALEKLKEFTPDLIIVDLRMPPMNGYEFLKILKEDEKLKEIPVIVLSRDRDPEVEKRCLELGANKYVPKPFSIQELMKVAEEMLN
245	MKSVLLVDDSETLRKVISFALEKEGYTVVFAKNGIEALEKLKEFLPDLIIVDLSMPPMNGFELLEILKNDEKLKNIPVIVLSGDRDPEVKERALKAGANKYIPKPFSISELMKVAKELLN
246	MKSVLVVDDSETLNKIITFSLEKEGYSVVLAKNGKEALEKLKEFTPDLIIVDLRMRPMNGEELLKILKNDEKLKKIPVIVLSLDRSPEVEKRALELGANAYIPKPFSIEELMKVARELLE
247	MKKVLLVDDSETLRKIISFALESEGLEVIFAKNGKEALEKLKKFTPDLIIVDLSMPPMNGLEFLKILKNDEKLKKIPVVVLSRDRDEEVKKRCLELGANKYIPKPFSIKELMEVVKKLLN
248	MKSVLVVDDSETLRKIITFALESRGYTTVLAPDGVAALEKLKEFRPDLIILDLSMPKMNGFELLRVLKEDEELREIPVVVLSGDEDEEVKKEALELGADKYIPKPFSISELMEVVDELLN
249	MKSILVVDDSETLRKVITFALEKEGYSVVLARNGKEALEKLKEFLPDLIIVDLNMPPMNGFEFLKILKNNEELKNIPVIVLSKDRDPEVEKKCLELGANKYIPKPFSIEELIKVAKELLN
250	MKKVLLVDDSETLRKIISFALESEGYSVVYAKNGKEALKKLEKFTPDLIILDLSMPIMNGFEVLKILKNNEKLKNIPVIVLSLDRDPEVKERCLELGANKYIPKPFSIEELMKVAKELLN
251	MKTVLLVDDSETLRKIISFALEKEGLKVIYAKDGIEALEKLEKELPDLIIVDLRMPKMNGFELLKILKENEKLKKIPVIVLSLDRDPEVEKKALELGADKYIPKPFSIKELIEVVKELLN
252	MKKILVVDDSETLNKIITFALKSRGFSVVLAKNGIEALKKLEKFLPDLIILDLRMPPMDGYTVLEILKNDPKLKEIPVVVLSADRSPETEKRALELGANKYIPKPFSIEELMKVVEELLN
253	MKKVLVVDDSETLRKIITFILESRGYSVVLAPNGKEALKKLEEFLPDLIIVDLRMPPMNGFELLKILKENEELKEIPVVVLSGDRDPEVEKEALELGADKYIPKPFSPQELMEVVDKLLN
254	MKSILLVDDSEVLSKIISFALEKEGYSVTLAKNGKEALEKLKEFLPDLIIVDLRMPPMNGFELLKILKNDEKLKKIPVIVLSGDRDPEVEEKCLELGADKYIPKPFSIEELMKVVKELLN
255	MKSVLLVDDSSTLQKIITFALEKEGYKVILAPNGKEALEVLKKQLPDLIIVDLSMPPMNGFELLKILKNDPELKKIPVVVLSKNSDPEVEKECLELGANAYVPKPFSIEELMKIVKKLLE
256	MKSVLLVDDSETMRKIISFALEKEGYKVIFAPNGKEALEKLKEFLPDLIIVDLRMPPMNGFELLKILKNDPELKNIPVIVLSGDRDPEVEEEALKLGANAYIPKPFSIEELIEVAKKLLE
257	MKTVLLVDDSETLSKIISFALEKEGLKVIRAPNGIEALEKLEKFLPDLIICDLNMPLMNGFELLKKLKNDEKLKKIPVVVLSANRDPEVEEECLKAGANAYIPKPFSIKELMEVVKKLLN
258	MKSVLLVDDSETMRKIISFALESEGYTVVLAPNGIEALEKLKEFLPDLIICDLRMPKMNGFELLKILKEDEKLKKIPVIVLSGDSTPEVKEKCLELGADYYIPKPFSIKELMKVAKELLN
259	MKKVLLVDDSETLRKIIKFAIESKGYSVIEAKNGIEALEKLKEELPDLIICDLNMPPMNGFELLKILKNDEKLKKIPVIVLSSDRSPEVEKKCLELGANKYIPKPFSIEELMKVIEELLN
260	MKTILLVDDSEVLSKIISFGLESEGYKVVFAPNGKEALEKLEKFLPDLIIVDLSMPPMNGFELLKKLKNDEKLKKIPVVVLSLNRDPEVEKKALELGADAYVPKPFSIKELMEVIKKLLE
261	MKTILLVDDSETLRKIITFALESKGYKVILAPNGKEALEKLKKFLPDLIIVDLRMPLMNGFELLKILKEDEKLKNIPVIVLSRDRDPEVEKRCLELGANAYIPKPFSIKELMKEVEKLLN
262	MKSVLLVDDSETLRKIISFALESRGYTVTYAPNGVEALKKLEASLPDLIIVDLRMRPMNGLELLRILREDPELREVPVIVLSGDRDPEVEKKCLEAGADLYVPKPFSIEELMKKAEELLN
263	MKSILLVDDSETLNKIISFALEKEGYKVVLAPNGKEALEKLKEFLPDLIIVDLSMPPMNGKELLKILKEDEKLKNIPVIVLSADSSEEVKKEALELGANYYVPKPFSIKELIEKVKELLN
264	MKSVLLVDDSETLNKIISFGLESRGYSVILAKNGKEALEKLKESLPDLIICDLSMPPMNGLELLKILKEDPKLKEIPVIVISGNRDPEVEKEALEAGANAYIPKPFSIKELMEVVDKLLN
265	MKSVLLVDDSETLSKIISFALEKEGYSVTLAPNGKEALEKLKEFLPDLIIVDLSMPPMNGLELLKILKNDEELKKIPVIVLSADRSPEVEKECLEAGADYYVPKPFSISELMEIAKKLLN
266	MKSVLLVDDSETLSKIISFALKSEGWTVTFAPNGIEALEKLKEFTPDLIILDLRMRPMDGFTVLKILKEDPVLKNIPVIVLSLDRSPEVEEKALKLGADAYIPKPFSIEELMEVAKKLLE
267	MKSVLLVDDSETLNKVISFALEKEGYTVILAPDGVSALEKLKESLPDLIIVDLSMPPMDGFELLKKLKEDEELKKIPVIVLSADSDPEVKEKALKAGANKYIEKPFSIKELIKEIKKLLN
268	MKTILVVDDSETLRKAITFGLESKGYSVILAKNGKEALEKLKKFLPDLIIVDLSMRPMNGLELLKILKEDPELKKIPVIVLSLDRDPEVEEKCLEAGANKYVPKPFSMSELMEIVEELLN
269	MKTILLVDDSETLRKIISFALESEGYKVIFAPNGVEALEKLKEFLPDLIIVDLNMPPMNGFELLKILKNDEELKKIPVVVLSRDRDPEVEKKALELGADKYIPKPFSIQELIKVVKELLE
270	MKKVLLVDDSETLRKIISFALKSKGYSVIEAKNGKEALEKLKEFLPDLIIVDLRMRPMNGYELLKILKNDEKLKNIPVIVLSLNRDPEVEKRCLELGANAYIPKPFSIEELMKVAEKLLN
271	MKSILLVDDSETLSKIIKFSLESKGYSVTLAKNGKEALEKLKEFLPDLIIVDLSMPPMNGLELLKILKEDEKLREIPVIVVSLDSDPEVKKEALEAGANKYVEKPFSIEELMEIVEELLE
272	MKSVLLVDDSETLQKIIEFALKSEGYTVIRAPNGKEALKKLEEFTPDLIIVDLRMPPMNGFELLKILKENEKLKKVPVIVLSKDRSEEVKQKALEAGADAYVPKPFSISELMKIAKELLN
273	MKSVLLVDDSETLRKIISFALESKGYSVVLAPNGIEALKKLEEFLPDLIIVDLRMPPMNGFELLKKLKEDEKLKKIPVVVLSADRDPEVEEKALEAGANKYVPKPFSIEELIKIVEELLN
274	MKSILLVDDSETLRKVISFALESKGYSVVFAKNGIEALEKLKEFLPDLIICDLSMPPMNGLELLKILKNDPELKKIPVIVLSKNRDPEVKKKCLELGANKYIPKPFSISELMKVVEELLN
275	MKSVLLVDDSETLRKIISFALESEGLTVIFAPNGIEALKKLEEFLPDLIIVDLSMPPMNGLEFLRILKNDPELREIPVVVLSKNRDPEVEKEALEAGANAYIPKPFSIEELMEVVKKLLE
276	MKSVLVVDDSETLRKIITFAIEKEGYKVVLAPNGIEALEKLEEFLPDLIILDLRMRPMNGLELLRKLKEDEKLREIPVVVLSGDRDPEVEEEALEAGANAYIPKPFSIKELMEVIKKLLN
277	MKSVLLVDDSETLRKIISFALKKEGYSVVFAPNGIEALKKLEEFLPDLIIVDLRMPPMNGLELLRILREDPELREVPVLVLSLDRSPEVEQRALEAGADAYVPKPFSISELMKIVKELLN
278	MKSVLLVDDSETLRKIIKFALESRGYTVIEAKNGKEALEKLKKQLPDLIIVDLSMPPMNGYELLKTLKNDEKLKKIPVIVVSADRDPEVKERALELGANAYIPKPFSISELMEVAEKLLN
279	MKSVLLVDDSETLRKIISFALESKGYKVIFAKDGVEALEKLKKFLPDLIIVDLRMPKMNGFELLKILKNDEELKKIPVIVISKDRSPEVKERCLEAGADAYIPKPFSIEELMKVVEKLLN
280	MKSVLLVDDSEVLSKVISFALKKEGYSVKLAPNGKEALEKLKKFLPDLIIVDLSMPPMNGFELLKILKNDEKLKEIPVIVLSRDRDPEVEKRCLELGANKYIPKPFSIKELMKVAKELLN
281	MKKVLLVDDSETLSKIITFALKSRGYEVILAPNGKEALEKLKKFLPDLIIVDLSMPLMNGEELLRILKEDEELKKIPVVVLSGDSSPEVEQRALELGADKYIPKPFSIEELMKVVEELLN
282	MKSVLLVDDSEVLNKVITFALESEGLTVTLARNGIEALEKLKESLPDLIIVDLSMPPMNGFELLKILKEDEELKNIPVVVLSGDRSPEVEKKALEAGANAYVPKPFSIQELMEIVKKLLE
283	MKTVLLVDDSETLRKVISFGLEKEGYKVVLAPNGKEALEKLEEFLPDLIIVDLSMPIMDGFTLLKILKNDEKLKKIPVIVLSLDRSPEVEKRCLELGANAYVPKPFSIKELLEIAKKLLN
284	MKSILVVDDSETLRKIITFALKSRGYSVILAKNGIEALEKLKEFLPDLIIVDLYMPPMNGFELLEILKNDEKLKEIPVLVLSLDRDPEVEERALKLGANKYVPKPFSIQELMKIVEELLN
285	MKSILLVDDSETLRKIISFALESKGYKVIFAKNGIEALKKLEKFLPDLIIVDLRMPPMNGFELLKILKNNEKLKKIPVIVISGDRDPEVEKEALELGADKYVPKPFSIKELIEEVEKLLN
286	MKTVLLVDDSETLRKIIKFILESKGYKVIEAPNGIEALKKLEEFLPDLIIVDLRMPPMNGFELLRVLKEDEKLREIPVVVLSTDRDPEVEKEALEAGADAYIPKPFSPKELMEVCEKLLN
287	MKSILLVDDSETLRKIISFALESKGYSVVFAPNGKEALEKLEKFLPDLIIVDLNMPPMNGFELLKILKNNEELKKIPVVVLSADRDPEVEKEALELGANKYIPKPFSIEELMKVIEELLN
288	MKSILLVDDSETLAKVIKFALESKGYTVTLAPNGIEALEKLKEFLPDLIICDLDMPPMNGFELLKILKNDEKLKKIPVIVLSGNRDPEVEKKALELGANAYVPKPFSIKELMEIAEKLLN
289	MKKILLVDDSETLRKVISFAIKKKGYEVILAKNGKEALEKLKKFIPDLIIVDLSMPPMNGLELLKILKNDEKLKKIPVIVLSADRSPEVEQECLENGANYYVPKPFSIKELMEIIEKLLN
290	MKKILVVDDSKTLRKVITFALEKKGYKVIYAPNGIEALEKLKEFLPDLIICDLSMPLMNGFELLKILKEDEELKKIPVVVLSGNRDPEVEKEALELGADKYIPKPFSIKELIEVVEKLLN
291	MKTVLLVDDSETLRKIISFALESRGYKVITAKNGKEALEKLKKFTPDLIIVDLNMPPMNGFELLKILKENEELRNIPVVVLSADTDPEVKKRALEAGANAYVPKPFSIKELMEIVEKLLN
292	MKSVLLVDDSETLRKIISFALESRGLKVIFAPDGIEALKKLEKELPDLIIVDLRMPKMNGFELLRILKEDEKLREIPVVVLSRDRDPEVEKEALELGADKYIPKPFSIEELMEVVEELLN
293	MKSVLLVDDSETLRKIISFALESEGLTVTLAPDGRAALEKLEEFLPDLIIVDLRMPPMNGFELLRVLAEDPELREVPVIVLSGDRDPEVEERCLRLGAHAYVPKPFSIEELMKIAKELLE
294	MKKILLVDDSETLRKVIKFALEKEGYEVIEASDGIEALKKLEEELPDLIIVDLSMPKMNGLELLKILKNDEKLKKIPVIVLSLDRDPEVEKKCLEAGANYYVPKPFSIKELMEIVKKLLN
295	MKSILLVDDSETLRKIISFALKKEGYTVIYAPNGIEALKKLEKFLPDLIIVDLRMPPMDGLTLLKILKENEELKNIPVIVISRDRSPEVEEKCLKLGANKYIPKPFSIKELMEEVKKLLN
296	MKTVLLVDDSETLSKIISFALESEGLKVIRAPDGIEALEKLKEFLPDLIIVDLRMPKMNGFELLEILKNDEKLKNIPVIVLSADRSEEVKEKALKLGADYYIPKPFSIKELMEVAKKLLN
297	MKKILLVDDSETLSKIISFALESKGYSVVFAPNGIEALKKLEEFLPDLIIVDLDMPPMNGLELLKILKEDEKLKKIPVIVISRNRDPEVEEIALEAGANAYVPKPFSIKELIEIIEKLLN
298	MKSILLVDDSETLSKIIKFALEKKGYSVVLAKNGVEALEKLKEFLPDLIIVDLSMPKMNGFELLRILREDPELRKIPVIVLSGDRSPEVEKRALELGADAYIPKPFSIEELMKVVEKMLN
299	MKSVLLVDDSETLSKIISFALESRGYTVIRAPNGKEALEKLKESLPDLIILDLSMPPMNGFELLKILKNDEKLKKIPVIVLSANRDPEVEEKALELGADKYIPKPFSISELMEVAEELLN
300	MKKVLLVDDSETLRKIIEFALKKEGYEVIRAKDGKEALKKLEKFLPDLIICDLSMPKMNGFELLEKLKNDEKLKEIPVIVLSKDRSPEVEKRCLELGADAYIPKPFSISELMEVAKKMLE
301	MKSVLVVDDSKTLRKIITFALESEGYTVIEAPNGIEALKKLKEFLPDLIIVDLRMPPMNGFELLKILKEDEKLKKVPVVVLSGDRDPEVEERCLELGADKYIPKPFSIKELMEVVKKLLN
302	MKTILLVDDSETLRKIISFALEKEGYKVIYAKNGIEALKKLEKFLPDLIIVDLRMRPMNGFELLKILKNNEKLKNIPVIVISADRSPEVEKECLELGADAYVPKPFSISELMEIVKKLLE
303	MKSVLVVDDSETLNKIITFAIESKGYSVVLAKNGKEALEKLEKFLPDLIIVDLSMPPMNGFELLRRLKEDEELKKIPVIVLSADRDPEVEERCLELGANAYVPKPFSIKELMEIIEKLLN
304	MKSVLLVDDSETLRKIIKFAIEKEGYTVIEAPDGIEALEKLKKSLPDLIIVDLSMPKMNGFELLKILKNDEKLKKIPVIVLSGNSDPEVEKRCLELGADKYIPKPFSIKELMKVINELLN
305	MKKILLVDDSETLRKIISFALESKGYKVVFAKDGVEALKKLEEFTPDLIIVDLRMPKMNGFELLKILKNNEKLKNIPVIVLSADRDPEVEERCLELGANAYIPKPFSIEELIEVVEKLLN
306	MKKVLLVDDSETLRRIIKFGLEKEGYKVIEAKNGIEALKKLEEFLPDLIIVDLRMPPMNGFELLKILKENEKLKKIPVIVLSGDRDPEVKEKALKLGANKYIPKPFSIKELMEEAKKLLE
307	MKSVLLVDDSETLQKIISFALEKEGYSVIRAKNGIEALKKLEKELPDLIIVDLSMPPMNGFELLKILKENEKLKKIPVIVLSLDRSPEVEKKCLEAGANAYVPKPFSIKELMEIAKKLLN
308	MKTVLVVDDSETLRKIITFAIESKGYKVITAPNGKEALEKLKKFLPDLIIVDLSMPIMNGFELLKILKNDPKLKKIPVIVLSADRDPEVKEKALELGANAYIPKPFSIEELMKVIEKMLN
309	MKKVLLVDDSETLNKIIKFGIEKEGYKVVLAPDGISALEKLKEFLPDLIIVDLSMRPMNGYELLKILKNDEKLKEIPVVVLSGDSSEEVKKKALELGADKYIEKPFSISELMEVIKKLLE
310	MKSILLVDDSETLRKIISFALESKGYSVVFAPNGKEALEKLEKFLPDLIIVDLSMRPMNGFELLKKLKEDEKLKKIPVIVLSADRSPEVEKKALELGADKYVPKPFSIKELIEIAEKLLN
311	MKKILLVDDSETLSKIIKFALESKGYSVVLAKDGIEALKKLEKFLPDLIIVDLSMPKMNGFELLKILKNNEELKNIPVIVISGNRDPEVKKKALELGANYYIPKPFSIKELMEVVEKLLN
312	MKSVLLVDDSETLNKIISFALESEGYTVTLAKNGVEALEKLKKFLPDLIILDLNMPPMNGFELLKILKEDEKLKKIPVVVLSLDSDPEVKEKALEAGADKYVDKPFSIKELMEVVKKLLN
313	MKKILLVDDSETLRKIIKFALEKRGYEVVEAKNGIEALKKLEEFLPDLIIVDLEMPPMNGFELLRILKEDEELRKVPVLVLSRDRDPEVEKEALELGADAYIPKPFSIKELMEVVEKLLN
314	MKSILLVDDSETLRKIISFALKSEGYTVVEAKDGIEALKKLEEFTPDLIIVDLSMPKMNGKEFLRILKNDPKLKKIPVIVLSGDRSPEVEKEALELGANAYIPKPFSISELMEVVKKLLE
315	MKTILLVDDSEVLRKVIKFALEKRGYKVIEAPNGVEALKKLEEFLPDLIILDLNMPPMNGYEVLRRLKEDPELRKIPVVVLSRDRTPEVEQRALELGANKYIPKPFSIEELMEVVEELLN
316	MKSVLLVDDSETLRKVISFALESEGLKVVFAPDGVEALKKLEEFLPDLIILDLLMPKMNGFELLKKLKNNEELKNIPVIVISKDRDEEVKEKCLKLGANAYIPKPFSIKELMEVVKKLLE
317	MKSVLLVDDSETMRKIISFGLEKEGYTVVYAPNGIEALKKLEEFLPDLIIVDLRMRPMNGFELLKKLKENEELKNIPVVVLSGDRSPEVEKKALEAGANAYIPKPFSITELMKVVKELLE
318	KKSVLLVDDSETLQKIISFALEREGYTVVRAPNGKEALEKLKEFLPDLIIVDLNMPPMNGLELLKILKEDEELKKIPVLVLSGDRTPEVEKKALEAGANAYIPKPFSISELMKVVKELLN
319	MKSILLVDDSETLTKVITFALESEGYKVVKAKDGIEALEKLKEFLPDLIIVDLSMPKMNGLELLKILKNDEELKKIPVIVLSANRDPEVKEKCLKAGANAYVPKPFSIKELIEIVKKLLN
320	MKSILLVDDSETLRKIITFALESEGYSVVLAKNGVEALEKLKKFKPDLIILDLSMPPMNGFEVLKILKEDEELKNIPVVVLSRNRDPEVEEKCLEAGANAYIPKPFSISELMEVVKKLLN
321	MKTILLVDDSETLNKIISFALESEGYKVILAPNGIEALKKLEEQLPDLIIVDLRMPPMNGLELLKILKNDPKLKKIPVIVLSGNRDPEVEEECLEAGADAYVPKPFSIKELIEIVKKLLE
322	MKTILLVDDSKTLRKIIKFALEKEGYKVIEAPNGKEALEKLKKFLPDLIIVDLSMPPMNGYELLKILKNDEKLKKIPVVVISADRDPEVKKKCLELGANAYVPKPFSIKELIKIIKKLLE
323	MKTILLVDDSETLSKIIKFALEKEGYKVILAKNGVEALEKLKKELPDLIIVDLRMPPMNGFELLKILKNDEKLKNIPVIVLSRDRDPEVEKRCLELGANAYIPKPFSIKELMEVVKKLLN
324	MKTILVVDDSETLRKIITFALESEGYSVILAPDGVAALEKLKEFLPDLIIVDLRMPKMNGLELLKILKEDEELKKIPVLVLSADRSPEVEKKCLEAGADAYVPKPFSIKELMEIVKKLLN
325	MKSILLVDDSETLSKIITFALEKEGYTVVLAKDGVEALEKLKKFLPDLIIVDLRMPKMNGFELLKILKNDEELKNIPVIVLSGDRDPEVEEEALKLGANKYVPKPFSIEELMKEVKKLLN
326	MKTVLVVDDSEVLNKVITFALESEGLKTILAPNGKAALEKLKKFLPDLIIVDLNMPPMNGLELLEILKNDPELRKIPVIVLSADRDPEVEERCLKAGANYYIPKPFSIKELMEVIKKLLN
327	MKSVLLVDDSETLSKVITFALEKEGYSVVLAPNGKEALEKLKEFKPDLIIVDLRMPLMNGLELLKILKNDEELKNIPVIVLSADRDPEVEKEALEAGANAYVPKPFSIEELMKIVKKLLN
328	MKTILVVDDSETLNKIITFALESEGYKVIRAKNGIEALEKLEEFLPDLIIVDLRMPPMNGFELLKKLKNNEKLKNIPVIVLSGDRDPEVEKRALELGANKYVPKPFSIEELMKIVKELLN
329	MKTILLVDDSETLQKIIKFGLEKEGYKVILAPNGKEALEKLKKFLPDLIIVDLSMPPMNGFELLKILKEDEKLKNIPVIVLSGDRDPEVEERCLEAGADAYVPKPFSISELLEIVKKMLN
330	MKSILLVDDSETLNKVITFALESEGYKVVLAPDGKEALEKLKEFLPDLIIVDLSMPKMNGFELLKILKNDEKLKNIPVLVLSRNRDPEVEEKALELGANAYVPKPFSIKELIEIVKKLLE
331	MKSILLVDDSETLRKIISFGLEKEGYKVVYAKNGKEALEKLEKFLPDLIIVDLSMRPMNGYEFLKILKNNEKLKNIPVIVLSRDRDPEVEEKALKLGADKYVPKPFSIKELLEIAKKLLN
332	MKSILLVDDSETLRKVIKFALEKEGYTVVEAKNGKEALEKLEKFLPDLIIVDLRMPPMNGFELLKKLKEDEKLKNIPVLVISGDRDEEVKEKALKLGANKYVPKPFSIKELMEIVKELLN
333	MKTVLLVDDSETLRKIISFALESRGYKVIYAPNGIEALKKLEEFLPDLIIVDLSMPPMDGLTLLKILKENEKLKNIPVVVLSRNRDPEVEKKCLEAGANAYIPKPFSIKELMEVVDKLLN
334	MKSVLLVDDSETLRKIISFALEKEGYKVIYARNGREALEKLKEFLPDLIIVDLSMPPMNGFELLRILKEDEELREVPVIVLSADRDPEVEQRALEAGANAYVPKPFSIKELMEIVKKMLE
335	MKKVLLVDDSETLNKIISFALKKKGYEVVLAKNGIEALKKLEEFLPDLIIVDLSMPKMNGLELLKVLKNDPKLREIPVIVLSLDRDPEVEEEALKAGADAYVPKPFSIEELMKIAEKKLN
336	MKSVLVVDDSETLRKIITFGLEKEGYEVVLAKNGKEALEKLKEFKPDLIIVDLRMPPMNGFELLKILKEDEELKEIPVVVISADSDPEVEKEALELGADAYVPKPFSIKELMEIVKKLLE
337	MKTILLVDDSETMRKIISFALESEGYKVILAKNGIEALEKLKEFLPDLIILDLRMPPMNGFELLKILKEDEKLKKIPVIVLSADRDPEVEEEALKLGANAYVPKPFSISELMEIVKKLLN
338	MKSVLLVDDSETLSKIIKFGLEKRGYKVVLAKNGKEALEKLKEFLPDLIIVDLRMPPMDGFELLKILKEDEELRKVPVVVLSGDRSPEVEERALEAGADKYIPKPFSIEELMKVVEELLN
339	MKSVLLVDDSETLSKIIKFALEKEGYSVTLAPDGIEALEKLKKSLPDLIIVDLSMPKMNGFELLKILKENEELKNIPVIVLSADRDPEVEEKALELGANKYVPKPFSIKELMEIVKKLLN
340	MKSILLVDDSETLSKVISFALKSEGYSVVFAPNGKEALEKLEKFLPDLIIVDLRMPPMDGYELLERLKNNEELKKIPVIVLSLDRSEEVKEKALKLGANKYIPKPFSIKELMEVVKELLN
341	MKSILVVDDSKTLRKVITFALESKGYSVVEAPDGVAALEKLKEFLPDLIIVDLSMPKMNGLELLRILKNDPKLKEIPVIVLSKDRDPEVEKKCLELGANAYIPKPFSIKELMEVVEKLLN
342	MKSVLLVDDSETLSKIISFALKSKGYKVVLAPNGKEALEKLKEFLPDLIILDLNMPPMNGFEVLKILKEDEKLKNIPVVVLSLDSSEEVKKKALELGADAYVSKPFSIKELMEIVEKLLN
343	MKSVLLVDDSETLRKIISFALEKEGYKVVFAKDGKEALKKLEEFLPDLIILDLRMRPMNGFELLKKLKNNPELKKIPVIVLSLDRDPEVEEEALKLGADKYVPKPFSIKELIEEVKKLLN
344	MKKILVVDDSETMRKIITFALESEGYSVILAPDGKEALEKLKEFLPDLIIVDLSMRPMNGYELLKILKNNPELKKIPVVVLSLDRDPEVKEKALKLGANAYVPKPFSIKELIEIVKKLLN
345	MKSVLLVDDSEVLSKIISFALESKGYKVILAKNGKEALEKLKEFLPDLIIVDLRMRPMNGFELLKILKEDPELKKVPVIVLSTDRDPEVEEKALKLGANKYIPKPFSIKELIKVAEELLN
346	MKKILLVDDSETLSKIISFALEKEGYSVIRAPDGIEALKKLEEFLPDLIIVDLRMPKMNGLELLRILKNDPKLREVPVVVLSADRTPEVEERALEAGADAYVPKPFSIEELMKIVKEKLE
347	MKTVLLVDDSETLNKIISFALEKEGLKVVLAKNGKEALEKLKEFLPDLIIVDLSMPPMNGFELLKELKNDEKLKKIPVIVLSGDTSEEVKEKCLELGANAYVPKPFSIEELMKIAKKLLE
348	MKSVLLVDDSETLRKIISFALEKEGYTVTYAKNGKEALKKLEKFLPDLIIVDLSMPPMNGFELLKILKEDEKLKNIPVIVLSKDRDPEVEKKCLELGADKYIPKPFSIKELMEVCKKLLE
349	MKSVLLVDDSETLNKVISFALESEGLTVRLAPNGKAALEKLKEFLPDLIIVDLNMPPMNGFELLKILKEDEKLKKIPVIVLSTDRTPEVEKEALELGADAYIPKPFSISELMKVAKKLLE
350	MKTVLLVDDSETLSKIIKFALESEGLKVVLAKNGIEALKKLEEFLPDLIIVDLRMPPMNGFELLEKLKNDEKLKEIPVVVLSADSSPEVEERCLKLGADKYIPKPFSIKELMEVVKELLN
351	MKSILLVDDSKTLRKVISFALKKEGYTVIEAKNGKEALEKLKESLPDLIIVDLSMPPMNGFELLKILKKDEKLKKIPVVVLSGDRDPEVEEKCLELGANKYVPKPFSIEELMEIVKKLLN
352	MKSILLVDDSETLRKIISFGLEKKGYKVIYAKDGKEALKKLEKELPDLIIVDLNMPKMNGFELLKILKNNEKLKNIPVVVISGDSSPEVEKKCLELGANYYVPKPFSIEELMKIIEKLLN
353	MKSVLVVDDSETLRKIITFALESKGYSVVTAPDGIEALKKLEKFLPDLIIVDLRMPKMNGFELLKILKEDEKLKNIPVIVLSRDRSPEVEKEALELGADAYVPKPFSIEELMKIAEELLN
354	MKSILLVDDSETLRKIISFSLEKEGYTVTFAPNGIEALEKLKKFLPDLIIVDLRMPPMNGFELLKILKNDEKLKNIPVIVLSADRDPEVEKEALELGADAYIPKPFSIKELMEVVKKMLN
355	MKTVLLVDDSETLRKIISFALEKEGYKVILAPNGKEALEKLEKFLPDLIIVDLSMPPMNGFELLKRLAEDPELRKVPVVVLSGDRDPEVEQRALEAGANAYIPKPFSIKELMEVVKKLLN
356	MKSILLVDDSETLSKIISFALESEGYKVVLAPNGKEALEKLKKFKPDLIIVDLRMPPMNGFELLKILKEDEELKNIPVIVLSADRDPEVEEKALELGANKYIPKPFSIKELIEVVKELLN
357	MKKVLLVDDSETLSKIIKFALESEGLEVVLAPNGKEALEKLKEFLPDLIIVDLRMPPMDGYELLKILKEDPELKKIPVVVLSADRDPEVEKRALELGADAYIPKPFSIEELMEVVKKLLE
358	SKSVLLVDDSETLAKIISFALEKEGYTVVLAPNGVEALRKLEEFLPDLIIVDLSMPPMDGFELLRRLAADPALRKIPVVVISKDRDPEVEERALALGADAYIPKPFSISELMEVVKKLLN
359	MKSILLVDDSETLRKIISFALKSEGYKVIFAKNGKEALEKLKEFLPDLIIVDLSMPIMNGFELLKILKNNEKLKKIPVIVISGNSDPEVKEKALKLGANAYVPKPFSISELIKIVKKLLE
360	MKKILLVDDSKTLRKVISFGLKSRGYEVVEAPNGKEALEKLKEFLPDLIILDLNMPIMNGFEVLKILKENEELKKIPVVVLSRDRSPEVKERALKLGANKYVPKPFSIKELMEIIEKLLN
361	MKSVLLVDDSETLQKIISFALEKEGYTVVRAKNGVEALEKLKEFLPDLIICDLRMPPMNGFEFLKILKNDEELKKIPVIVLSADRDPEVEKRALELGADKYVPKPFSIEELMEVAKELLE
362	MKKVLLVDDSETLSKIIKFAIESEGYEVILAKDGKEALEKLKEFLPDLIIVDLSMPKMDGFTLLKILKEDEKLREIPVIVLSADRSPEVEKKALEAGADAYVPKPFSISELMKIVKKLLN
363	MKKVLLVDDSETLQKIISFALEKEGYEVILAKDGIEALEKLKKELPDLIIVDLNMPKMNGFELLKILKNDEKLKKIPVIVISRNRDPEVEEEALKLGADYYIPKPFSIEELIEVAKKLLN
364	MKKVLVVDDSEVLNKVITFALKKEGYEVVLAKNGVEALKKLEKFLPDLIIVDLRMPPMNGFELLKKLKEDEELKKIPVIVLSGDRDEEVKKKCLELGANKYVPKPFSIEELMKIAKELLE
365	MKSVLLVDDSETLRKVISFALESEGLTVTLAPNGKEALEKLKKSLPDLIIVDLNMPIMNGLELLEILKNDPELKKIPVIVLSGDRSPEVKERALKAGANAYVPKPFSIKELMEIVKKMLN
366	MKTILLVDDSETLRKIISFALESEGYKVIFAKNGIEALEKLKKFRPDLIIVDLDMPPMNGLELLRILKEDEELREIPVVVLSADRDPEVKERALEAGADAYVPKPFSIQELMEIVKKLLE
367	MKSVLLVDDSETMRKIISFALEKEGYTVIYAPNGKEALEKLKKFLPDLIILDLSMPPMNGLELLKELKNNEELKKIPVIVLSGDSSPEVEKKCLELGANKYIPKPFSIKELMEVAKKLLN
368	MKSVLLVDDSETLAKIIKFALESRGYSVILAKNGKEALEKLKESLPDLIILDLRMPPMDGFTLLEILKNDPELKKIPVIVLSGDSDPEVKERCLELGADAYIEKPFSIKELMEVVEKLLN
369	MKTVLLVDDSETLNKIISFALEKEGYKVVLAKNGKEALEKLKEFLPDLIILDLRMPVMNGEEVLRILANDPKLRKIPVIVLSADRDPEVEERCLELGANAYIPKPFSIEELMKVAKELLE
370	MKSVLLVDDSEVLRKVISFALEKEGYKVVFAPNGKAALEKLKEFRPDLIIVDLNMPIMNGEELLRILAEDEELREIPVIVLSLDRDPEVKQRALELGANAYIPKPFSIEELMEVVKKLLN
371	MKSVLLVDDSETLSKIISFALESEGLTVTLAKDGKEALKKLEKFLPDLIIVDLRMPPMNGYELLKILKENPELKKIPVIVLSKDRDPEVEERALKLGANAYVPKPFSISELMEIVKKLLN
372	MKSILLVDDSETLRKVISFGIKKRGYSVVYAPNGIEALEKLKEFTPDLIIVDLSMPPMNGLELLKKLKEDEKLKNIPVIVLSADRSPEVEKEALELGADKYIPKPFSISELMEEIDKLLN
373	MKTILLVDDSETLRKIISFALEKEGYKVVFAPNGKEALKKLEKFLPDLIILDLSMPPMNGFEVLKILKNDPKLKEIPVVVLSGDRSPEVEEKALEAGANAYIPKPFSIKELMEVVKKLLN
374	MKSVLLVDDSETLRKIISFALEKEGYKVITAPNGKEALEKLEKELPDLIIVDLRMPLMNGFELLKILKEDEKLKKIPVVVVSADRDEEVKERCLKLGADAYVPKPFSIKELMEIVKKLLE
375	MKTILLVDDSETLRKVITFALESEGYKVVLARNGKEALEKLKKFLPDLIIVDLRMPPMDGYELLKILKNDEELKNIPVVVISLDRDPEVEKRCLELGANAYVPKPFSIKELMEVVKKLLN
376	MKSVLLIDDSETLRKVIKFALESKGYTVVEAPDGKEALEKLEKFLPDLIILDLRMPKMNGYEVLKILKNDEKLKDIPVIVLSRDRTPEVEQKALELGANAYVPKPFSIEELIKIAEELLN
377	MKSILLVDDSETLRKIISFALEKEGYSVTFAPNGKEALEKLKKFLPDLIILDLSMRPMNGLEVLKILKEDEKLKNIPVVVLSGDRDPEVEEKCLEAGASAYVPKPFSIEELMEIVKKKLN
378	MKSILLVDDSETLNKIIKFGLEKKGYTVTLAKDGIEALKKLEESLPDLIIVDLSMPKMNGFELLKILKENEKLKKIPVVVISADRDPEVKERCLKAGANAYVPKPFSIEELMKIIEKLLN
379	MKKVLLVDDSETLRKIISFALEKRGYEVVYAPNGKEALEKLKEFLPDLIILDLSMPPMNGFEVLKILKNDEELKKIPVIVISADRDPEVEKKALEAGADAYVPKPFSIQELMEIAEKLLN
380	MKSVLLVDDSETLRKIISFALESEGLSVIRAPNGIEALKKLEEFLPDLIIVDLRMPPMNGFELLKILKNDEKLKKIPVVVLSGDRDPEVEQRCLEAGADAYVPKPFSIQELMEIVKKLLN
381	MKSVLLVDDSETLRKIISFALESEGYKVTFAKNGIEALEKLKEFLPDLIILDLSMPPMNGFEVLKILKNDEKLKKIPVVVLSLNRDPEVEQKALELGANKYIPKPFSIKELMEVVKELLN
382	MKKVLLVDDSETLRKIISFALESEGYKVVYAPNGKEALEKLKEFKPDLIIVDLRMPPMNGFELLKILKNDEELKNIPVIVLSGDRDPEVEEKCLKAGANYYIPKPFSIKELMEVVKKLLN
383	MKSILLVDDSETLQKIISFALESKGYTVTLAPNGVAALEKLEKFTPDLIIVDLRMPPMDGFELLRILKEDPELREIPVIVLSADRSPEVEKEALELGADAYVPKPFSIQELMEIVEKLLN
384	MKSVLLVDDSETLRKIISFALEKEGLTVTFAKNGKEALEKLKKFLPDLIIVDLRMRPMDGFELLKILKEDEKLKKIPVVVLSRDRDPEVEKRALELGANKYIPKPFSIEELMEVIKELLE
385	MKSILVVDDSETMRKVITFALESKGYTVTLAKDGVEALKKLEEFTPDLIIVDLNMPKMNGFELLKILKENEELKNIPVIVVSADRSPEVEKKALELGANKYIPKPFSISELMKVVEKLLN
386	MKSILLVDDSETLSKVIKFALESKGYTVTLAPDGIAALEKLKEFLPDLIIVDLNMPKMNGRELLKILKNDEKLKNIPVIVLSGDRSEEVKKEALELGANKYVPKPFSISELLEIVEKMLN
387	MKKVLVVDDSETLRKIITFALKKRGYEVVEAPNGREALEKLKEFLPDLIILDLRMPPMDGYTVLRILKEDEKLKKIPVIVLSLDRDPEVEERALELGANKYIPKPFSIQELMEEVEKLLN
388	MKSILLVDDSETLRKIISFAIESKGYSVVFAKNGIEALEKLKKFLPDLIILDLSMPPMNGFEVLKILKNDEKLKNIPVVVLSKDRDPEVEEKALELGANAYIPKPFSIEELMKVIEELLN
389	MKSVLLVDDSETLRKIISFALEKEGYKVVLAPNGVEALKKLEEFLPDLIIVDLNMRPMNGLELLKILKNDEKLKKIPVVVLSRNRDPEVEKKCLEAGANKYIPKPFSIEELIKVVKELLE
390	MKSVLLVDDSETLSKIITFALESKGYKVTLAPDGKEALEKLKEFLPDLIIVDLSMPKMNGFELLKILKEDEKLKNIPVIVISADRDPEVEKKCLELGADKYVPKPFSIEELMKVAEELLN
391	MKSILLVDDSETLNKIISFALEKRGYKVILAKNGKEALKKLEEFKPDLIIVDLRMPPMNGFELLKKLKNDEELKNIPVVVLSGDRDPEVEKKCLELGANAYIPKPFSIEELMKVVEKLLN
392	MKSILVVDDSEVMRKIITFAIEKRGYKVVLAPNGIEALKKLKEFLPDLIICDLNMPPMNGLELLRILKEDEELKKIPVIVLSADRDPEVEEKCLEAGADAYVPKPFSIEELMKIIEEKLN
393	MKKVLLVDDSETLRKVISFALEKEGYKVILAKNGKEALEKLKKELPDLIIVDLSMPIMDGFELLKILKNNEELKKIPVLVLSGDRDPEVEKRALEAGADAYVPKPFSIQELMKIVKKLLN
394	MKKVLVVDDSETLRKIITFALEKEGYEVVLAPDGIAALEKLKEFLPDLIIVDLRMPKMDGFELLKILKEDEKLKKIPVIVLSGDRTPEVEERCLELGANAYIPKPFSIKELIKVVKKLLN
395	MKSVLLVDDSETLQKVISFALKSKGYTVTLAPNGKAALEKLKKFLPDLIILDLRMPPMNGFELLKILKEDEKLKNIPVIVLSGDRSPEVEKKALELGADKYIPKPFSIKELMKVVEELLN
396	MKKILLVDDSETMNKIISFALEKEGYSVVFAKNGKEALEKLKEFLPDLIIVDLRMPIMNGLELLKILKEDEKLKNIPVIVLSGDRDPEVEEEALKAGANAYVPKPFSIKELMEIAKKLLN
397	MKSILLVDDSETMAKIISFALESRGYSVTLAKNGKEALEKLKEFLPDLIIVDLSMPPMNGLELLKVLKENPELRKIPVVVLSANRDPEVEKECLEAGANAYIPKPFSIEELMKVVEELLN
398	MKSVLLVDDSETLRKVISFALEKEGYSVIEAKNGIEALKKLEKELPDLIIVDLSMRPMNGYELLKILKNDEKLKKIPVIVLSADRSPEVEQRALELGADKYVPKPFSIKELMKIVKELLE
399	MKTVLLVDDSETLRKVIKFALESRGYKVIEAKNGKEALEKLKEFLPDLIIVDLRMRPMNGFELLKILKNDEKLKNIPVIVISGDRDPEVEKECLELGANKYIPKPFSIKELMEEADKLLN
400	MKSILLVDDSETLRKIISFALEKEGYSVIYAPNGIEALKKLEEFTPDLIIVDLRMPPMNGYELLKKLKNDEKLKNIPVIVISGDRDPEVEKKALELGANYYVPKPFSIEELMKIVKKLLN
401	MKKILLVDDSETLRKVISFALEKEGYEVVRAKNGKEALEKLKEFLPDLIILDLNMPPMNGFEVLKILKEDEKLKNIPVIVLSLDRDPEVEKRALELGANAYIPKPFSIKELIEVVKKLLE
402	MKTILLVDDSETLRKIISFGLEKKGYKVIPAKNGKEALEKLKEFLPDLIILDLSMPPMNGYELLKILKNDEKLKNIPVIVLSGDRSPEVKEKALELGANAYIPKPFSIEELLKVAEKLLN
403	MKSVLLVDDSETLRKIISFGLESKGYKVILAKNGKEALEKLKEFKPDLIIVDLNMPPMNGYELLKILKNDEELKNIPVIVLSADRDPEVEERCLKLGANAYVPKPFSIEELLKIAEKLLN
404	MKKILLVDDSETLRKIISFALEKEGYEVVYAENGIEALKKLEKFLPDLIIVDLSMRPMNGFELLKKLKEDEKLKKIPVIVLSKDRDPEVEERALELGANKYIPKPFSIKELIEVVKKLLN
405	SKSVLLVDDSETLRKVISFALESKGYTVVFAKDGIEALEKLKKFLPDLIIVDLSMPKMNGFELLKILKEDPKLKEIPVIVLSGNRDPEVEKKALEAGANAYIPKPFSIKELMEVAEKLLN
406	MKSILLVDDSETLSKIITFALESEGYKVVLAPDGIEALKKLEEFTPDLIIVDLRMPKMNGFELLKILKEDEERKNIPVVVISGDRDPEVEEECLKLGANKYVPKPFSIKELMEIVKELLN
407	MKSVLLVDDSETLRKIISFTIEKKGYSVIFAKNGKEALEKLKKFLPDLIIVDLSMPIMNGFELLKILKEDEKLKNIPVVVLSLDRDPEVKERALELGANKYIPKPFSTEELMKVIEKLLN
408	MKSVLLVDDSETMRKIISFALEKKGYTVVHAKNGIEALEKLKEFKPDLIIVDLRMPPMNGFELLKILAEDEELKNIPVIVLSGDSDPEVEKRALELGANAYIPKPFSIEELMEVAEKMLN
409	MKSVLLVDDSETLRKIIKFALESEGYKVIEAPNGIEALEKLKEFLPDLIIVDLRMPPMNGLELLKILKNDEKLKNIPVIVLSTDSDPETKKKCLEAGANYYVEKPFSIEELMEIVKKLLE
410	MKSVLLVDDSETLRKIISFALEKEGLTVVFAPNGKEALKKLKEFTPDLIIVDLSMPPMNGYELLKIIKNDEKLKNIPVIVLSLNRDEEVKEKCLKLGANYYVPKPFSISELMKVAKKLLN
411	MKSVLLVDDSETLRKIISFALESEGYSVIYAPNGIEALEKLKKELPDLIILDLDMPPMNGYEVLKILKNDEKLKKIPVIVLSKDRSEEVKKRCLELGANAYIPKPFSIKELMAVAKKLLN
412	MKSVLLVDDSETLRKIISFALESEGLSVVFAKNGIEALKKLEEFLPDLIIVDLSMPPMNGFELLKKLKNDPKLKEIPVVVLSTNRDPEVEKKCLEAGADKYIPKPFSISELMKVVKELLN
413	MKSVLLVDDSETMSKIISFALESEGLTVVRAPNGKEALEKLEKFTPDLIIVDLRMRPMDGYELLRVLKNDPERRKVPVVVVSLDRSPEVEERCLELGADAYIPKPFSIEELMEVVKKLLS
414	MKKVLLVDDSETLSKIISFALESEGYSVILAKNGKEALEKLKEFLPDLIICDLRMPPMNGLELLKILKNDEKLKNIPVLVLSGDRSPEVEEKCLEAGANKYVPKPFSIKELMEVVKELLN
415	MKSVLLVDDSETLRKIISFALEKRGYTVTFAPDGVEALEKLEEFRPDLIIVDLRMPKMDGFELLRRLAEDPELREIPVIVVSLDRTPEVEQRCLEAGADAYVPKPFSIEELMKIAEELLN
416	MKSVLLVDDSETLAKVISFALEKEGYTVTLAKNGKEALEKLKKFLPDLIIVDLSMPLMNGFELLKILKNDEKLKKIPVIVLSADRDPEVEEKALKLGANAYVPKPFSISELIEVAKKLLN
417	MKSVLLVDDSETLRKIISFALEKEGLTVIYAPNGKEALEKLKESLPDLIIVDLSMPPMNGFELLKELKNDEKLRKIPVIVLSRDRSEEVKERALELGADAYIPKPFSISELMEVVKKLLN
418	MKSILLVDDSETLSKIIKFGIESKGYKVILAKNGKEALEKLKKQLPDLIILDLNMPPMNGFEVLKILKNDEKLKNIPVVVLSLDRSPEVKEKALKLGANKYVPKPFSISELMKIIEKLLN
419	KKKVLLVDDSETLRKVIKFALEKEGYEVVLAKNGIEALEKLKEFLPDLIIVDLSMPPMNGYELLKILKNDEELKKIPVIVLSRDRSPEVEEKCLEAGANKYVPKPFSIKELMEVAKKLLN
420	MKSILLVDDSETMSKIIKFAIESEGYTVTLAPNGKAALEKLKEFTPDLIILDLNMPPMNGFEVLKILKNDEKLKDIPVIVISGDRSPEVEEECLKGGADAYVPKPFSIKELMEIIKKLLN
421	MKSILLVDDSETLAKVIKFALESEGYKVILAKNGKEALEKLKKFLPDLIIVDLSMPPMNGFELLKILKNDEKLKNIPVIVLSGNRDPEVEKKALELGANKYIPKPFSIKELMEEVKKLLN
422	MKSVLVVDDSETMRKVITFALESEGYTVVLAPNGKEALEKLKEFLPDLIIVDLSMPPMNGYELLKILKENEELKNIPVIVLSLDSSPEVKEKCLELGANAYVDKPFSIKELMEVAKKLLN
423	MKSVLVVDDSETMRKVITFALESEGYTTVLAKNGVEALEKLKKFLPDLIIVDLSMRPMNGYELLKKLKEDEELKKIPVVVLSADRDPEVEKKCLELGANAYVPKPFSIKELMEIVKKLLN
424	MKSVLVVDDSETLNKVITFALESEGYSVVLASNGIEALKKLEEFLPDLIICDLNMPPMNGFELLKILKNNEKLKKIPVIVLSGDSDPEVEKKALEAGANAYISKPFSISELIEVAKKLLE
425	MKSVLLVDDSETLNKIISFALEKEGYSVVLAPNGKEALEKLKKFLPDLIIVDLRMPIMNGYELLKILKNNEELKNIPVIVLSADRDPEVEKKALELGANAYIPKPFSIKELLETVKKLLN
426	MKSVLLVDDSETLRKVIKFALEKEGYKVIEAPNGKAALEKLKEFLPDLIIVDLRMPPMNGFELLKILKNDEKLKKIPVIVLSADRDPEVEERALELGANKYIPKPFSIEELMKVVKKLLN
427	MKSILLVDDSETLSKIISFAIEKEGYTVTLAPDGRAALEKLKEFLPDLIILDLRMPPMNGLEVLKILKEDPELRKIPVVVLSKDRDPEVEKEALEAGANAYIPKPFSIKELMEVIKKLLE
428	MKSVLLVDDSEVMSKVITFALESEGLSVVLAKNGKEALEKLEEFLPDLIIVDLSMPPMNGFELLKILKEDEELKKIPVIVLSLDRSPEVEEKCLELGADKYIPKPFSIQELMEVAKKLLN
429	MKTVLLVDDSKTLQKIISFALKKEGLSVIFAPNGKEALEKLKEFLPDLIIVDLSMPPMNGLELLKILKEDEELKKIPVVVLSGNRDPEVEKECLEAGANKYVPKPFSIKELMEIVKELLN
430	MKTILLVDDSETLRKIISFALKSEGYSVIFAKDGKEALEKLEKFLPDLIIVDLSMPKMNGYELLKILKNDPKLKKIPVIVLSGDSDPEVKEKALELGANAYVEKPFSIQELMEIVKRLLE
431	MKKVLLVDDSETLRKIISFALKSRGYEVVFAPDGVEALEKLKEFLPDLIIVDLRMPKMNGFELLKKLANDEKLKNIPVVVLSGDRDPEVEQRALEAGANAYVPKPFSIKELMEVVEKLLN
432	MKSILLVDDSETLRKIIKFALEKKGYTVIEAKNGKEALEKLKETLPDLIIVDLRMPPMNGFELLRILKEDEELKKIPVIVVSGDRSPEVEKRALEAGANAYIPKPFSIEELMKVVEKLLN
433	MKSVLLVDDSETLRKVIKFSLEKEGYSVIEAKNGVEALKKLKEFLPDLIIVDLSMPPMNGYELLKILKEDPKLKKIPVIVLSLDRDPEVEKKALELGANYYIPKPFSIKELMEVAKKLLN
434	MKSILLVDDSEVLRKVISFVLESKGYKVIFAPDGIEALEKLKKQLPDLIILDLRMRPMNGLELLKILKNDEELKKIPVVVLSGDRDPEVEKKCLEAGANAYIPKPFSTKELMEVVEKLLN
435	MKSILLVDDSETLRKIISFALEKEGYTVIYAKDGKEALEKLKEFKPDLIIVDLSMPKMNGFELLKILKNDEELKNIPVIVLSGNSDPEVEKKALEAGANKYVTKPFSISELMEEVKKLLN
436	MKSILLVDDSETLRKVISFALESEGYTVIYAPDGREALEKLKKFLPDLIIVDLDMPPMNGFELLKILKEDEKLKNIPVIVLSRNRDPEVEERALELGANAYVPKPFSIKELIEIAKKLLN
437	MKSVLLVDDSETLRKVIKFGLESEGYSVIEARNGIEALEKLKEFLPDLIILDLRMPPMNGFEILKILKNDEKLKKIPVIVVSLDRTPEVEERCLKAGANKYIPKPFSIKELLEVVKELLN
438	MKKVLLVDDSKTLRDIISFALKKEGYEVVLAENGIEALKKLEKFLPDLIIVDLRMPPMNGYELLKILKEDEKLKKIPVIVLSGDRTPEVEKECLELGADAYIPKPFSISELMEVAKKLLN
439	MKSILLVDDSETLRKIISFALEKKGYKVIYAKNGKEALEKLKKFLPDLIIVDLRMPPMNGFELLKVLKEDEKLKKIPVIVLSRDRTPEVEEKALKLGADKYVPKPFSIKELMEIVEELLN
440	MKSILLVDDSETMRKIISFALEKEGYTVVYAPNGVEALEKLKEQLPDLIIVDLRMRPMNGFELLKELKNDPELKNIPVIVVSGDRSPEVEKRALEAGANKYIPKPFSIKELMEVAKKLLN
441	MKTILLVDDSETMRKIISFALEKRGYKVVLARNGKEALEKLEKFLPDLIIVDLRMPPMNGFELLEKLKNDPKLKEIPVIVLSADSDPEVKKKCLELGANKYIEKPFSIKELMEVVEELLN
442	MKSILLVDDSETLSKVISFAIESKGYKVIRAKNGIEALEKLKEFLPDLIIVDLNMPKMNGLELLKILKENEKLKKIPVIVLSADRSPEVEKECLEAGANAYVPKPFSISELMEIIEKLLN
443	MKSILLVDDSETLRKIISFALESRGYTVIFAKNGKEALEKLKKFLPDLIILDLNMPPMNGFEVLKILKNDPELKNIPVVVLSANRDPEVEKKALELGANKYVPKPFSIEELMKVVEKLLN
444	MKSVLLVDDSEVLAKVISFALEKRGYTVTLAPDGVAALEKLKEFLPDLIIVDLSMPKMNGLELLRILKEDPELRKVPVIVLSADRDPEVEEECLAAGADAYIPKPFSIKELMETVEKLLN
445	MKTILLVDDSETLSKIITFVLESEGYSVILAPDGIAALEKLKKFLPDLIILDLRMPKMDGLELLKILKNDEKLKKIPVIVLSADRDPEVEKRCLEAGANAYIPKPFSPEELMKVVKKLLN
446	MKSVLLVDDSETMRKIISFALESEGYKVIYAKDGIEALKKLEKFLPDLIIVDLNMPKMNGLELLKILKNNEKLKKIPVIVLSGDSDPEVKKKCLEAGANKYVVKPFSIKELMEIAKELLE
447	MKSVLVVDDSETLRKIITFGLEKEGLTTILAKNGKEALEKLKKFLPDLIICDLSMPPMNGLELLKILKNDEKLKKIPVIVLSGNRDPEVEEECLKAGANYYVPKPFSIEELMKIVKKLLN
448	MKSVLLVDDSETLRKIISFALESRGYTVTFAKDGIEALEKLKKFLPDLIIVDLRMPKMNGYELLKILKNDEKLKKIPVVVLSADRDPEVEERALELGADAYVPKPFSIKELMEIVDKLLN
449	MKKVLLVDDSETMRKIISFAIEKEGYEVIYAPNGKAALEKLKEFLPDLIIVDLSMPIMDGFELLKVLKNDPKLKEIPVIVLSANRDPEVEKRALELGADAYVPKPFSIEELMEIIKKMLE
450	MKKILLVDDSETLRKIISFALKSEGYEVIYAKNGIEALKKLKEFLPDLIIVDLSMPKMNGYELLKILKEDEKLKNIPVIVLSGDRSEEVKKKCLELGADKYVPKPFSIKELIEIVKKLLN
451	MKTVLLVDDSETLRKVISFALESEGYKVVFAPDGIEALKKLEEFLPDLIIVDLRMPKMDGYELLKILKENEELRNIPVVVLSRDRSPEVEKKALELGANKYVPKPFSIRELMKIVKELLN
452	MKTVLLVDDSETLRKVISFALEKRGYSVIFAKNGIEALKKLEKFLPDLIISDLNMPPMNGFELLEILKNDPELKEIPVVVISRDRTPEVEKRCLEAGANAYVPKPFSIEELMEIVDKLLN
453	MKKVLLVDDSETLNKIISFALEKRGYSVVLAPDGKEALEKLKEFLPDLIIVDLRMPPMNGFELLKILKNDPKLKNIPVIVLSLDRDPEVEERALELGANKYIPKPFSIEELMKVAEELLN
454	MKTILLVDDSETLRKIISFALEKEGYKVILAPDGIEALKKLEEFLPDLIIVDLSMPKMNGFELLKILKNNEKLKKIPVIVLSANRDPEVEEKALKLGANAYVPKPFSIKELIEIVKKLLN
455	MKSVLLVDDSETLRKIISFALESEGYKVVLAKNGKEALEKLKKFLPDLIILDLSMPIMDGFTLLKILKEDEKLKKIPVIVISANRDPEVEKKALEAGANKYVPKPFSIEELIKIAKKLLN
456	MKTVLLVDDSETLQKIIEFALKSEGYKVIRAPNGKEALKKLEEELPDLIIVDLSMPIMNGFELLKKLKEDEKLKKIPVVVLSADRDPEVEERALELGADKYIPKPFSIKELMEVVKELLN
457	MKSILLVDDSETMRKIISFALESEGYTVTYAKNGIEALKKLEEFLPDLIILDLSMPPMNGFELLKILKNDEKLREIPVVVLSADRDPEVEQRALEAGANAYVPKPFSISELIEIVKKLLE
458	MKSVLLVDDSETLRKIISFGLEKEGYSVVLAKNGKEALEKLKEFLPDLIIVDLSMRPMNGFELLKILKNDEKLKNIPVIVLSGDSSPEVEKKALELGANKYVSKPFSIKELLEEVKKLLN
459	MKKILLVDDSETLRKIISFALEKRGYKVIEAPNGIEALKKLEEFLPDLIIVDLSMPPMNGFELLKILKNNEELKKIPVIVLSGDRDPEVEKKALELGANAYVPKPFSIEELMEIVDKLLN
460	MKSILLVDDSETLQKIISFAIEKEGYKVVFAPNGIEALEKLKEFLPDLIIVDLRMPPMNGLELLRILKEDEKLKKIPVVVLSLDRSPEVEEEALKAGADAYVPKPFSISELMEIIKKLLE
461	MKSVLLVDDSETLNKIIKFALEKEGYKVVLAPNGKEALEKLKKFLPDLIIVDLRMPPMNGRELLKILKEDEKLRNIPVIVLSGDRDPEVEKEALELGADAYVPKPFSIEELMKIAEKMLN
462	MKSILLVDDSETMRKIISFALEKEGYSVVYAKDGIEALKKLKEFLPDLIIVDLSMPKMNGFELLRILAEDPELRKIPVVVISLDRDPEVERRALELGASAYIPKPFSIKELMEVVKKLLN
463	MKKILLVDDSETLRKIISFALESEGYEVVYAPDGVEALKKLEEFLPDLIIVDLRMPKMDGLELLKILKENPELKKIPVVVLSLDRSPEVEEKALKAGANAYVPKPFSIKELMEIVKKLLE
464	MKTVLLVDDSETLRKIISFILEKEGYKVIFAKNGIEALKKLEEFLPDLIISDLSMPPMNGLELLKKLKNNEELKKIPVIVLSANRDPEVEELALKLGANKYVPKPFSPKELMEIVKKLLN
465	MKSILLVDDSETLLKIISFALESEGYTVVRARNGKEALEKLKEFLPDLIILDLRMPLMNGFEVLRILKNDPELREIPVIVLSGDRSPEVEERALEAGADAYVPKPFSIKELMEIVKKMLN
466	MKSVLLVDDSETLRKIISFALEKRGYTVVYAPDGIEALKKLEKFLPDLIIVDLRMPKMNGFELLEKLKNNEELKKIPVVVLSADRDPEVEKRALEAGADAYVPKPFSIEELMEIVEKLLN
467	MKKILLVDDSETLQKVIKFALEKKGYEVVLAKNGKEALEKLKEFLPDLIIVDLSMPPMNGLELLKILKENEELKKIPVIVISGNRDPEIEKKCLELGANKYIPKPFSIKELIEVIEKLLN
468	MKKVLLVDDSEVLRKVISFALEKEGLKVVFAKNGKEALEKLKKFLPDLIIVDLRMPPMNGYELLKILKNDEELKKIPVIVLSGDRDPEVEKRCLELGADKYVPKPFSIEELIKIVKELLE
469	MKSVLLVDDSETLSKIIKFALEKEGLSVTLARNGKEALEKLKEFTPDLIIVDLSMPPMNGLELLKILKEDEKLKNIPVIVLSLDSDPEVEKKCLEAGANKYIPKPFSIQELMKVAKQLLN
470	MKSVLLVDDSETLSKIISFGLEKEGYSVILAPNGKAALEELKKQTPDLIILDLRMPLMDGFTLLETLKNDEKLRNIPVIVLSGDRDPEVEKRCLEAGADAYIPKPFSISELMEVAKKMLN
471	MKKVLLVDDSETLRKIISFALKSEGYEVIYAKNGIEALKKLEKEIPDLIIVDLSMPLMNGKEFLKILKNNEKLKKIPVIVLSKNRDPEVEKEALELGANKYVPKPFSIKELIKIAKELLE
472	MKSVLLVDDSETMRKIISFALESKGYKVVYAPNGKEALEKLKKFLPDLIIVDLRMPLMNGFELLKILKNNEKLKKIPVVVLSADRDPEVEEECLKLGANAYIPKPFSIEELMEVVDKLLN
473	MKSVLLVDDSETLRKIISFALESEGLTVVYAKNGVEALEKLKKFLPDLIICDLNMPPMNGFELLKILKNDEKLKNIPVIVLSGNRDPEVEKKALELGANAYIPKPFSIKELMKTVKKLLN
474	MKSILLVDDSETLSKVIKFALEKEGYKVILAKNGIEALEKLKEFLPDLIILDLRMRPMNGFEVLKILKNDEKLKKIPVIVLSGDSDPEVKERALKLGANKYVPKPFSISELIKIAKELLN
475	MKSVLLVDDSETLRKIISFALEKEGYKVIYAKNGKEALKKLEESLPDLIILDLRMPPMDGFELLRILKEDPKLKEIPVVVLSGDRSPEVEERALEAGADAYIPKPFSISELMEVVKELLE
476	MKSVLVVDDSETLNKIITFALEKRGYTVTLAPDGIEALKKLKEFLPDLIIVDLNMPKMNGFELLKILKNDEELKKIPVIVLSADRSPEVEEEALKAGANAYVPKPFSIEELMKIADKLLN
477	MKSVLLVDDSETLAKVIKFALEKEGYKVVLAPDGVAALEKLKEFLPDLIIVDLRMPKMNGFELLRELKEDPELREIPVIVISGDRDPEVEKRCLELGANAYIPKPFSIEELIKVAKKLLN
478	MKKILLVDDSETLRKIIKFALEKEGYEVVLAKNGIEALKKLEEFLPDLIILDLNMPPMNGFEVLKILKEDEKLKKIPVIVLSADRDPEVEKRCLELGANAYIPKPFSIEELMEVVKKLLE
479	MKTILLVDDSETLRKVISFALKSRGYTVIEAKDGVEALKKLEKFLPDLIIVDLRMPKMNGFELLKILKNDEKLKNIPVVVLSADRDPEVEQRALELGANAYIPKPFSISELMEVVEKLLN
480	MKTILLVDDSETLSKIISFALESEGYKVILAKDGKEALEKLKEFLPDLIIVDLRMPKMNGFELLKILKNDPKLKEIPVVVLSGDRSPEVEKEALEAGANAYVPKPFSISELMKIVKELLN
481	MKTVLLVDDSETLRKIISFALEKRGYKVVLAPNGKAALEKLKEFLPDLIIVDLSMPPMNGFELLKILKEDEELKKIPVIVLSGNRDPEVEEEALKLGADKYIPKPFSIEELMEVAEELLN
482	MKSILLVDDSETLSKIIEFALKKEGYTVIRAKDGIEALEKLKEFLPDLIIVDLSMPKMNGFEFLKILKNDEELKKIPVIVLSLDRDPEVEKKALELGANKYVPKPFSIEELMKEVKKLLE
483	MKSVLLVDDSETLRKIITFALEKKGYTVVEAPNGKAALEKLEKFLPDLIIVDLSMPPMNGFELLKILKNNEKLKNIPVIVLSANRDPEVEEECLKLGANKYIPKPFSIEELMKEVEKLLN
484	MKTILVVDDSETMRKIITFALESRGYKTILAKNGKEALEKLKKFLPDLIIVDLRMPPMNGFELLKKLKEDEKLKNIPVVVLSANRDPEVEKRALELGADKYIPKPFSIEELMEVIDELLN
485	MKSVLLVDDSETLRKVISFALEKEGLKVIFAPNGIEALEKLKEFLPDLIIVDLNMPPMNGFELLKILKEDEKLKEIPVIVLSLDRDPEVEEECLELGADKYIPKPFSIEELMKVVKELLE
486	MKKILLVDDSETLRKIISFALKSEGYEVILAKDGKEALEKLKEFLPDLIIVDLSMPKMNGFELLKILKNNEKLKKIPVIVISLNRDPEVEKKALELGANKYIPKPFSIKELIEEVKKLLN
487	MKTILVVDDSETMRKIITFVLESKGYKVIEAPNGREALEKLEEFTPDLIIVDLSMPPMNGLELLKILKEDEKLKKIPVVVLSGDRDPEVEQKCLEAGANAYVPKPFSLQELMEIVEKLLN
488	MKSVLLVDDSETLRKIISFGLEKEGLKVVFAPNGKEALEKLKEFLPDLIILDLRMPPMDGFTVLKILKENEKLKNIPVIVVSLDRDPEVEKRALELGANAYIPKPFSIKELMEVAKKLLN
489	MKSVLLVDDSETLNKIIKFALESKGYSVVLAKDGVEALEKLKEFLPDLIIVDLRMPKMNGFELLKILKEDPELKKIPVIVLSGDRTPEVEKECLELGANYYIPKPFSIEELMKVAEELLN
490	MKSVLLVDDSETLRKIISFALESEGLTVTVAKNGKEALEKLKEFLPDLIIVDLRMPIMNGFELLRILKENEELRKIPVLVLSADRDPEVEEEALEAGADAYVPKPFSIQELMEIVKKLLN
491	MKSVLLVDDSETLRKVISFALESEGYSVVFAPNGVEALKKLEKFLPDLIIVDLRMRPMNGLELLKILKENEKLKKIPVIVLSTDRDPEVEEEALKAGADKYIPKPFSIEELMKVAKELLE
492	MKSILLVDDSETLSKIITFSLEKKGYSVTLAPDGKAALEKLKKFLPDLIIVDLNMPLMNGYELLKILKNDEKLKNIPVIVLSADTTPEVKEKALKLGANAYIPKPFSIEELMKKVEELLN
493	MKKVLLVDDSETLAKIISFALEKEGYSVVLARDGIEALEKLKEFLPDLIIVDLRMPKMNGFELLKILKNDEKLREIPVVVLSRDRTPEVEKKALELGADKYVPKPFSIEELMKIVKELLE
494	MKSVLLVDDSETLSKIISFALEKEGYTVVLAKDGIEALKKLKEFLPDLIIVDLSMPKMNGFELLKILKNDEKLKNIPVVVLSLDRDPEVEEKALELGANAYVPKPFSIEELMKIVKELLE
495	MKTVLLVDDSEILRKIISFALESEGLKVIEAPNGIEALEKLKEFLPDLIIVDLSMPKMNGYELLKILKNDEKLKNIPVIVLSADSSEEVRQKALELGANKYIPKPFSISELMEVAKKLLN
496	MKSILLVDDSETLSKIISFALEKKGYTVTLAKNGKEALEKLEKFLPDLIIVDLRMPPMNGFELLKKLKNDEKLKNIPVIVLSLDRDPEVEKKALELGANAYIPKPFSIEELIKVAEKLLN
497	MKSILLVDDSETLSKIIKFALEKEGYKVIIAKDGIEALEKLEKFTPDLIIVDLRMPKMNGFELLKKLANDEELKKIPVIVLSLDRSPEVEEECLKAGANKYVPKPFSIKELMEIVKKLLN
498	MKSVLLVDDSEVLRKIISFALESEGLTVTYAKDGIEALKKLEEFTPDLIISDLSMPKMNGLELLKILKNNPELKKVPVIVLSGNRDPEVKKECLEAGADAYVPKPFSIKELMEIVKKLLN
499	MKKVLLVDDSETMRKIISFALEKRGYSVVFAPDGIEALKKLKEFLPDLIILDLNMPKMNGFELLKILKEDEELKKIPVIVLSGNRDPEVEEKALELGADKYIPKPFSISELMEVVEKLLN
500	MKSVLLVDDSETLRKIISFGLEKEGYTVIHAKNGKEALEKLKEFLPDLIIVDLRMPPMNGLELLKKLAEDPELKKVPVIVLSADRDPEVEKKALEAGANAYIPKPFSIKELLEVAKKLLE
501	MKSILLVDDSETLRKIISFALEKRGYSVVFAPNGIEALKKLEEFLPDLIIVDLSMRPMNGYELLKILKEDPKLREIPVVVLSTNRDPEVEKRCLELGANAYVPKPFSIEELMEIVEKLLN
502	MKKILLVDDSETLQKIISFSLEKEGYEVVKAKNGKEALEKLKEFLPDLIIIDLNMPPMNGYELLKILKEDEKLKNIPVVVLSTDSSPEVKKKALELGANKYVTKPFSIKELMEIVKELLN
503	MKKILLVDDSETLRKIIKFALEKEGYSVVEAKNGKEALEKLKEFLPDLIILDLSMPPMNGLEVLEILKNDEKLKKIPVVVVSRDRSEEVKERCLKAGADKYVPKPFSISELMEIVKKLLN
504	MKSILLVDDSETLSKIISFAIESEGYSVILAPNGKEALEKLKKSLPDLIIVDLSMPPMDGFELLKILKEDEKLKKIPVIVLSRNRDPEVEEKCLELGADKYIPKPFSIKELMEVIKKLLE
505	MKSILLVDDSETLNKIIKFALESKGYTVVLAPDGVAALEKLEEFRPDLIIVDLRMPKMDGFELLRRLKEDEELREIPVVVVSTDSSPEVEERALELGADAYVPKPFSIEELMEIIDKLLN
506	MKSVLLVDDSETMRKVISFALEKEGYTVTFAKDGIEALKKLEEFLPDLIIVDLSMPKMNGFELLKILKNNEKLKNIPVIVLSTNRDPEVEEECLKLGANYYVPKPFSIEELIKIIKKLLN
507	MKSVLLVDDSEVLRKIISFALESEGWSVVYAPDGIEALEKLKEFLPDLIIVDLRMPKMNGFELLKILKENPELKKIPVIVLSGNRDPEVEERCLKLGANAYIPKPFSIKELIEVAKKLLN
508	MKSILLVDDSETLRKVITFALEKEGYTVVTAPDGIEALKKLEEFLPDLIIVDLSMRPMNGFELLKILKNDEKLKKIPVIVLSADRDPEVEKRALELGADAYIPKPFSIKELIKVVKELLN
509	MKSILLVDDSETLSKIISFALESKGYTVTLAPNGIEALEKLKEFTPDLIIVDLNMPPMNGFELLKILKNDEELKKIPVIVLSKDRTPEVKEKALKLGADKYIPKPFSIEELIKVVEELLN
510	MKSVLLVDDSETMSKIISFALEKEGLKVILARNGIEALEKLKKFLPDLIILDLNMPPMNGFEVLKILKNDEKLKKIPVVVLSLDRDPEVKERCLKLGANAYVPKPFSIEELMKIVKKLLE
511	MKSVLLVDDSETMRKIISFALEKEGYTVVYAKNGKEALEKLKEFLPDLIIVDLRMRPMNGFELLKILKEDPELKKIPVIVLSGDRDPEVKEKCLKLGANAYVPKPFSISELMEIAKKLLE
512	MKTILLVDDSETLNKIISFALESKGYKVIRAPNGKEALEKLKEFLPDLIIVDLRMPPMNGFELLKELKNNEELKKIPVIVLSADRDPEVEEKALELGADKYIPKPFSIKELMEVAEKLLN
513	MKKILLVDDSETLRKIISFALEKEGYEVVLAKDGVEALEKLKKFLPDLIIVDLNMPKMNGYELLKILKNDEELKNIPVVVLSGDRSPEVEERALKLGANAYVPKPFSIQELIKIVKKLLN
514	MKSVLLVDDSEVMRKIISFALEKEGLKVVYAPDGIEALKKLEKFLPDLIIVDLNMPKMNGFELLKILKNNEKLKNIPVIVLSLDRSPEVEEKALKLGANKYIPKPFSIKELMEEVKKLLN
515	MKSVLLVDDSETLRKIIKFALEKEGYSVIEAKDGIEALEKLKEFLPDLIILDLRMPKMNGLEVLKILKNDEKLKKIPVVVISGDSDPEVEKKCLEAGANYYIPKPFSIKELIEVVKKLLN
516	MKSVLLVDDSETLRKIISFALESRGYTVTFAPDGVAALEKLEEFLPDLIIVDLRMPPMNGLELLERLANDPELRKVPVVVLSGDRSEEVKEKCLKAGASAYIPKPFSIQELMKVVEELLN
517	MKSVLLVDDSETMRKIIKFALEKEGYTVIEAKNGKEALEKLEKELPDLIIVDLRMRPMNGFELLKILKNDEKLKNIPVIVLSGDRSPEVEEKALELGADKYIPKPFSIKELMKVAKEMLN
518	MKSVLLVDDSETMRKIISFALESEGLKVTLAKNGKEALKKLEEKLPDLIIVDLRMPPMNGLELLKKLKEDEKLKNIPVVVLSLDRDPEVEKECLEAGADAYVPKPFSIKELMEIVKKLLE
519	MKKVLLVDDSEVLRKIISFALESEGYSVIYAKNGIEALEKLKEFLPDLIILDLRMPKMNGFEVLKILKNDEKLKEIPVVVLSADSDPEVEKEALELGANKYVVKPFSIKELMKVVKELLN
520	MKSILLVDDSETLRKIIKFALEKEGYTVIEAPNGKEALEKLKKSLPDLIIVDLRMPPMNGFELLKILKNDEKLKNIPVIVLSGDRSPEVKEKCLKLGANAYIPKPFSISELMEVVKKMLN
521	MKSVLLVDDSETLSKIISFALEKEGYSVTFAPNGKEALKKLEEFLPDLIILDLSMPPMNGFEVLKKLKNDEKLKKIPVIVLSANRDPEVEEECLKLGANKYVPKPFSIKELMKIAKELLN
522	MKSVLLVDDSETLRKIISFGLESKGYTVIYAPDGKAALEKLKEFLPDLIIVDLSMPPMNGLELLKKLKNDEKLKEIPVIVLSGNRDPEVEKECLEAGADKYVPKPFSIKELLEIAEELLN
523	MKKVLLVDDSETLRKIISFALEKEGLSVIFAPDGVEALEKLKEFLPDLIIVDLRMPKMDGYEFLKILKENEKLKNIPVIVLSGDRDEEVKKKALELGANAYIPKPFSIKELMEVVKKLLE
524	MKTILLVDDSETLAKIIKFALESKGYSVVLAPNGVEALEKLKKFLPDLIIVDLDMPPMNGLELLKILKNDEKLKNIPVIVLSRNRDPEVEEEALKLGADKYVPKPFSIKELMEIVEELLN
525	MKSVLLVDDSETLAKIIKFALEKEGLSVTLAPNGKEALEKLKKFKPDLIIVDLRMPPMNGYELLKILKNDEELKEIPVIVLSGDRSPEVEQKALELGADKYIPKPFSIEELMEVAKELLE
526	MKSVLLVDDSETLRKIISFALESKGYKVIYAPNGKEALEKLEEFLPDLIILDLDMPPMNGFEVLKILKNDEKLKNIPVIVLSRDRSEEVKKEALELGANKYIPKPFSIKELIEVAEKLLN
527	KKTILLVDDSETLRKIISFALEKEGYSVIYAKNGKEALEKLKEFLPDLIIVDLSMPPMNGFELLKILKNDEKLKKIPVVVISKDRSPEVEKKALEAGANKYVPKPFSIEELMKIIKELLE
528	MKTVLVVDDSETLNKVITFALEKKGYKVILAKDGIEALEKLKEFLPDLIILDLRMPKMNGFELLKILKEDEKLKKIPVLVLSKDRTPEVEEEALKAGANAYVPKPFSIEELMKIVEKLLN
529	MKSVLLVDDSETMRKIISFALEKEGYKVVFAKNGIEALEKLKKFTPDLIIVDLNMRPMNGFELLKILKEDEKLKNIPVIVLSTDRSPEVEKECLELGADKYIPKPFSIKELMEVAKKLLN
530	MKTVLLVDDSETLQKIISFSLEKEGYKVVRAPNGKEALEKLKEFTPDLIIVDLRMPPMNGLELLKTLKNDEKLKNIPVIVLSGDRDPEVEKEALEAGANAYVPKPFSIEELMKIAKKLLN
531	MKSVLLVDDSETLRKIISFALESKGYTVTFAPNGVEALEKLKEFLPDLIIVDLRMPKMDGFELLRILAEDPELKKIPVLVLSRDRDPEVEQRALEAGANAYVPKPFSISELMEIVEKLLN
532	MKTVLLVDDSETLRKIISFALESKGYKVVLAKNGIEALEKLKEFTPDLIICDLRMPPMDGFELLKILKEDPELKKVPVVVLSADRDPEVEKRALEAGADAYIPKPFSIQELMEVVDKLLN
533	MKSILLVDDSETLSKIISFVLESKGYKVVFAKNGIEALKKLKEFLPDLIIVDLSMRPMNGFELLKILKNDEELKNIPVIVLSRNRDPEVEEKCLKLGANKYVPKPFSLKELMEEVEKLLN
534	MKTVLLVDDSETLAKVITFALEKKGYKVILARNGIEALEKLKEFLPDLIISDLSMRPMNGLELLKILKENEKLKNIPVVVVSANRDPEVEKECLEAGANYYIPKPFSIEELIKVIEKLLN
535	MKSILVVDDSETLRKIITFALEKEGYTVVLAKNGKEALEKLKEFTPDLIIVDLDMPIMNGLELLKILKNDPVLKNIPVVVLSANRDPEVEKECLEAGANYYIPKPFSIEELMKVVKKLLN
536	MKKVLLVDDSETLRKIISFALESKGYSVIYAKNGIEALEKLKEELPDLIILDLRMPPMNGFELLKILKENEELKKIPVIVISADRDPEVEKRCLEAGANAYIPKPFSISELIKEVEKLLN
537	MKKVLLVDDSETMRKVISFALESEGLEVVLARNGKEALEKLEKFLPDLIIVDLRMRPMNGFELLRRLKEDPELRKVPVLVLSGDRDPEVEQRCLEAGADAYIPKPFSIEKLIEEVRKLLS
538	MKTILLVDDSETLRKIISFALEKEGYKVIYAKNGKEALEKLKEFLPDLIIVDLNMPPMNGYELLKILKNDPKLKEIPVIVLSLDRDPEVEKRALEAGANAYIPKPFSISELMKTVKKLLN
539	MKSVLVVDDSETLRKIITFALEKEGYKVVLAPNGIEALEKLKEFLPDLIIVDLRMRPMNGFELLKILKEDEELKKIPVVVLSADSTPEVEKEALELGADKYIPKPFSISELMKVVKELLN
540	MKTVLVVDDSEVLRKIITFALEKEGYKVILAKDGIEALEKLKKFLPDLIILDLNMPKMNGLEVLKILKNDEKLKKIPVIVISLDRDPEVEKKALEAGANAYIPKPFSIKELIEVAKKLLE
541	MKSILLVDDSKVLNKIISFALKSKGYKVVLAENGIEALKKLEEFLPDLIICDLRMPKMNGFELLKILKNDEKLKNIPVIVLSGDRDPEVEKKCLEAGANAYIPKPFSIKELMKVVEKLLN
542	MKSVLLVDDSEVLRKIISFALESKGYTVIYAPDGVEALKKLEEQLPDLIIVDLRMPKMNGFELLRKLAEDEKLREIPVIVLSADRDPEVEKRALEAGADAYIPKPFSIKELMEVVEKLLN
543	MKSILLVDDSETLQKIISFALESRGYKVIRAPDGIEALEKLKKELPDLIIVDLRMPKMNGFEFLKILKEDEKLKKIPVIVISKDRDPEVEKRALEAGADYYVPKPFSISELMEIVEKLLN
544	MKKVLLVDDSETLRKIISFALEKRGYKVIYAPNGKAALEKLKEFLPDLIIVDLSMPPMNGFELLKKLKNDEKLKEIPVIVLSADRDPEVEKKALELGANAYVPKPFSIKELMEIVEKLLN
545	MKTVLLVDDSETLRKIISFALESKGYKVILAPDGVEALKKLEEFLPDLIIVDLRMPKMNGFELLRILKNDPELKKIPVVVLSSDRDPEVEERALKLGADKYVPKPFSIEELMKVVEELLN
546	MKSVLLVDDSETLNKVISFALERRGYSVVLAPNGRAALEKLEEQLPDLIIVDLRMPPMNGLELLRVLAEDPRLREVPVVVLSRDRTPEVEEEALRAGARAYVPKPFSIEELMAVVEELLS
547	MKSILLVDDSETLRKIISFALEKEGYKVIYAKDGKEALEKLKEFKPDLIIVDLNMPKMNGFELLKILKEDEELKKIPVLVLSLDRDPEVEKKALELGADAYVPKPFSIKELMEIVKKLLE
548	MKTILVVDDSETLNKIITFGLEKEGYKVILAPNGKEALKKLEKQLPDLIIVDLRMPPMNGLELLKRLKNDPKLKNIPVVVLSADRSPEVEKEALEAGANAYVPKPFSIKELMKIVKELLN
549	MKSVLLVDDSETLSKIISFALEKRGYTVTRAPDGVAALEKLEESLPDLIICDLRMPKMNGLELLRRLREDPALREVPVVVLSGDRDPEVERECLEAGADAYIPKPFSIEELMKVVEKLLN
550	MKTVLLVDDSETLRKIISFALESEGYKVVYAPNGKEALEKLEEFLPDLIIVDLDMPPMDGFTLLEILKNDEKLKKIPVIVLSRDRSPEVKEKALKLGANAYIPKPFSIEELMEVAKKLLN
551	MKSVLLVDDSETLRKIISFALEKEGYTVTYAPNGKEALEKLKKFLPDLIIVDLSMPIMNGYELLKILKNDEKLKKIPVVVISADSDPEVKKRALELGANKYVEKPFSISELIEIIKKLLN
552	MKSILLVDDSETLRKIISFALEKEGYTVTYAKNGKEALEKLKKFTPDLIIVDLSMPPMNGYELLKILKNNEELKKIPVVVLSKNRDEEVKEKALKLGANKYVPKPFSIQELMKIIKELLN
553	MKSILLVDDSEVLSKVISFALESRGYTVVLAKNGKEALEKLKEFLPDLIILDLRMPPMNGFEVLRILKNDEKLKEIPVVVLSGDRSEEVKERALEAGANAYIPKPFSISELMEVVEKLLN
554	MKSILLIDDSKTLRKIISFALEKEGYKVTLAENGIEALEKLKEFTPDLIILDLSMPPMNGFEVLKILKEDEKLKNIPVIVLSKNRDPEVEKRALELGANKYIPKPFSIEELMKVVKELLN
555	MKTILLVDDSETLRKIISFALESRGYKVIFAPNGKEALEKLKEFLPDLIIVDLNMPPMNGLELLKILKNDPKLKKIPVVVLSLDRDPEVEKECLEAGADYYVPKPFSISELMEVVEKLLN
556	MKSILLVDDSEVLRKIISFALESEGYKVIFAPNGKEALEKLKEFLPDLIIVDLRMRPMNGFELLKILKNNEELKKIPVIVLSADRDPEVEKKALELGANAYIPKPFSIKELMEVVKKLLN
557	MKSVLLVDDSETLSKIISFALEKEGLKVVLAENGVEALKKLEKFLPDLIIVDLRMRPMNGFELLKKLKEDEKLKKIPVIVLSGDRDPEVEKKALELGANAYIPKPFSIEELMKVVKKLLE
558	MKTILLVDDSETLSKIITFALESEGYKVILAKNGIEALKKLEKELPDLIIVDLSMPPMNGYELLKKLKEDEKLKKIPVVVISLNRDPEVEEKALELGADAYVPKPFSIKELMEIVKKLLN
559	MKSVLLVDDSETLRKVISFAIEKEGYSVIFAPNGKEALEKLKKTLPDLIIVDLRMPPMNGLELLKILKNDEKLKKIPVVVISGDRDPEVEKECLEAGADKYVPKPFSISELMEIIKELLN
560	MKKILLVDDSETLRKIISFALESKGYSVVFAPDGKEALKKLEEFLPDLIIVDLSMPPMNGFELLKKLKEDEKLKKIPVIVLSLDRDEEVKEKCLEAGANAYVPKPFSIEELMKIVEKMLN
561	MKTILLVDDSETLRKIISFAIESKGYKVILAKNGIEALKKLEKELPDLIIVDLRMRPMNGYELLKILKNDEKLKKIPVIVLSRDRTPEVKEKALKLGANKYIPKPFSISELMEVIEELLN
562	MKSILLVDDSETLRKIISFALESEGYKVIYAPNGKEALEKLKEFLPDLIIVDLSMPPMNGYELLKVLKENEELKKIPVIVLSKNRDPEVEKKALELGADAYIPKPFSISELMEVVKKLLN
563	MKSVLLVDDSETLAKIISFALESEGYTVTLAKNGIEALEKLKEFLPDLIIVDLSMPKMNGLELLKILKEDPKLKEIPVIVISKDRSPEVEEKCLKLGANKYIPKPFSIKELMKVAKELLN
564	MKKVLVVDDSETLRKIITFALKSRGYEVVLAKNGIEALKKLEKFLPDLIIVDLNMPPMNGFELLKKLKNDPKLKEIPVVVLSADRDEEVKKKALELGANAYVPKPFSIKELMEIVEKLLN
565	MKSILLVDDSETLAKIISFALESKGYKVVFAPDGKSALEKLKEFLPDLIIVDLSMPPMNGLELLKILKNNEELKNIPVVVVSGDSSPETEKKCLEAGANYYVPKPFSISELMEIVEKLLN
566	KKKVLVVDDSEVLRKIITFALESKGYSVVEAPDGIEALKKLEEFLPDLIIVDLRMPKMNGLELLKILKNNEKLKNIPVIVISGDRDPEVEKKCLEAGANKYIPKPFSIQELLKEAEELLN
567	MKKILLVDDSETLRKIISFALESEGYSVVFAPNGKEALEKLEKFLPDLIIVDLRMPPMDGLELLKILKENEELKKIPVLVLSADRTPEVEKECLEAGANAYVPKPFSIKELMEIVKKLLN
568	MKSILLVDDSETLRKIISFGLKSKGYSVIYAKNGIEALKKLEKFLPDLIIVDLNMPPMNGEELLKILKNNEELKKIPVIVLSADRSPEVEKRALELGADAYVPKPFSIEELMKIVDELLN
569	MKSILLVDDSETLRKVITFALEKEGYKVVTAPDGKAALEKLKEFLPDLIILDLSMPPMNGFELLKILKENEKLKKIPVIVLSGDSDEEVKKEALELGANKYIDKPFSIKELIEVVKKLLN
570	MKKILVVDDSETLNKIITFALESEGYKVILAPDGIEALKKLEKFTPDLIILDLSMPKMNGLEVLKILKENEKLKKIPVVVLSLDRSPEVEKKALEAGANAYVPKPFSISELMKIVKELLN
571	MKKILLVDDSETLSKVIKFAIESEGYSVILAKNGKEALEKLKEFLPDLIILDLSMRPMNGFELLKILKEDEKLKKIPVVVLSANRDPEVEEKCLELGADAYVPKPFSIEELMKIIKELLN
572	MKSILVVDDSETMNKIITFALEKKGYTVTLARNGKEALEKLKKSLPDLIIVDLRMPPMNGLELLKILKNDEKLKNIPVVVLSGDRTPEVEKECLEAGADAYIPKPFSIEELMEVVEKLLN
573	MKKVLLVDDSETLRKIIKFALEKEGWKVVEAKDGKEALEKLKKFLPDLIILDLSMPLMNGFEVLKILKENEKLKKIPVIVLSTNRDPEVEEKALEAGANAYIPKPFSIKELIEVAKKLLN
574	MKSVLLVDDSETLRKIISFAIESKGYKVVFAPNGIAALEKLEKFLPDLIIVDLRMPPMNGFELLKILKENEELKNIPVVVLSLDRDPEVKERCLELGADKYVPKPFSIKELMKEIEKLLN
575	MKSVLLVDDSETMRKIISFALEKKGYTVVEAPNGKEALEKLKKFLPDLIIVDLNMPIMNGFELLKILKEDEKLKNIPVIVLSADRDPEVEKRCLELGANKYIPKPFSISELMEVAEELLN
576	MKSVLLVDDSEVLSKIIKFALESEGYTVTLAKNGKEALEKLKEFLPDLIIVDLSMPIMNGFELLKILKEDEKLKKIPVIVISADRDPEVEKKALELGANAYVPKPFSIKELMKIAKEMLN
577	MKTVLLVDDSETLSKVIKFVLESRGYKVVLAKNGIEALKKLEEFLPDLIILDLNMPPMNGFEVLKILKEDEKLKNIPVIVLSADRSEEVKKKALELGADAYIPKPFSTKELMEVAEKLLN
578	MKSILLVDDSETLRKIIKFALEKEGYTVIEAKNGKEALEKLEKFLPDLIIVDLNMPIMNGLELLKKLKNDEKLKNIPVIVISADSSPEVKEKCLKAGANKYIEKPFSIQELMEVVKELLN
579	MKSVLLVDDSETLQKIIEFALKSKGYSVVRAPDGIEALEKLKEFLPDLIIVDLDMPKMNGFELLKKLKNDEKLKKIPVVVISKDRDPEVKQRALEAGADKYVPKPFSIKELIEVVEKLLN
580	MKSVLLVDDSEVLSKVITFALEKEGYKVILARNGIEALEKLKEQLPDLIILDLNMPPMNGLEVLRILKNDPELREIPVIVLSADRDPEVEERCLAAGANKYIPKPFSIEELMKVAKELLE
581	MKKVLLVDDSETMRKIISFGLEKEGYSVVLAKNGKEALEKLEEFLPDLIIVDLSMPPMNGFELLKKLKENEELKNIPVIVLSGNRDPEVEKKCLELGADKYVPKPFSIKELMKIAKELLN
582	MKKILLVDDSETLSKIIKFALEKEGYKVILAKNGIEALEKLKKELPDLIIVDLSMPPMNGFELLKILKEDEKLKKIPVVVLSGDRDPEVKEEALKLGADKYVPKPFSIKELIKIIKELLN
583	MKSVLLVDDSETLRKVISFALESKGYKVVYAPNGKEALEKLKKFLPDLIIVDLNMPPMNGFELLKILKNDEELKKIPVVVLSADRSEEVKKRCLELGADKYVPKPFSIEELIKIVEELLN
584	MKSVLLVDDSKTLRKVISFALESEGYSVVEAPNGKAALEKLEEFLPDLIIVDLRMPPMNGFELLRRLKEDPELREIPVIVLSGDRSPEVEQRALELGADAYIPKPFSIEELMKVVRKLLN
585	MKSVLLVDDSETLRKIISFALEKRGYSVTYAPNGKEALEKLKEFKPDLIIVDLNMPPMNGFELLKILKEDEELKEIPVIVLSADRDPEVEKKCLELGADAYIPKPFSIEELMKVAEELLN
586	MKSILLVDDSETLRKIIKFALESRGYSVVEAPNGIEALEKLKEFTPDLIILDLRMRPMNGYEVLRILKEDEKLREIPVIVLSADRTPEVEKKALELGANAYVPKPFSIKELMEIVDKLLN
587	MKSILLVDDSETLSKIIKFALESEGYTVTLAPNGKEALEKLEKFLPDLIIVDLSMPPMNGFELLKRLASDEKLRKIPVIVISKDTDPEVKKRALEAGADAYVPKPFSIKELMKIVKELLN
588	MKSILVVDDSETLRKIITFGLESEGYTVVLAKNGIEALKKLEKFLPDLIIVDLRMPPMNGYKLLEILKNNEELKKIPVVVLSKDRTEEVKEKALKLGANKYIPKPFSIEELLKVVKKLLN
589	MKSILLVDDSETLAKIIEFALRSEGYSVIRAPNGIEALEKLKKFTPDLIIVDLRMPPMNGFELLKILKNDEKLKNIPVIVLSGDRDPEVEERCLELGADAYIPKPFSIEELLEVAKKLLE
590	MKKVLLVDDSETLSKIIKFALEKEGYEVILAKNGKEALEKLKEFLPDLIIVDLRMPPMDGFELLKILKNDPKLKKIPVIVLSGDRSPEVEEEALKLGADAYVPKPFSIKELMEIVKKMLN
591	MKSILLVDDSETLSKVIKFALEKKGYSVVLAPNGKEALEKLKKFIPDLIIVDLNMPPMNGFELLEILKNDEKLKKVPVVVLSGDRSPEVKERALALGADAYVPKPFSIKELMEIVEKLLN
592	MKSILLVDDSETLSKIIKFAIEKEGYTVTLAKDGVEALKKLEEFLPDLIIVDLSMPKMNGLELLKKLKENEELKKIPVIVLSGNRDPEVKEKCLEAGANAYIPKPFSISELMEVIKKLLN
593	MKKILLVDDSETLRKIISFALEKEGYTVIYAKNGKEALEKLKKELPDLIIVDLRMRPMNGLELLKILKEDEKLKKIPVVVLSGDRDPEVEKRCLEAGADAYIPKPFSIKELMKVVKELLN
594	MKSVLLVDDSETLSKIISFGLEKEGLTVTRAPNGVAALEALEKRLPDLIIVDLRMPPMDGLELLRRLAEDPELRKVPVVVLSGDRDPEVEERCLAAGADAYIPKPFSIKELMEVVKKLLN
595	KKKILVVDDSKTLRKIITFALKKEGYEVVEAPDGISALEKLKKFLPDLIIVDLRMPKMNGYELLKILKNNEELKKIPVIVLSRDRSPEVEKKALELGANAYIPKPFSIQELIEVVKKLLN
596	MKSILLVDDSETLRKIISFALESKGYSVVLAKDGIEALEKLKKFLPDLIILDLSMPKMNGFELLKILKENEKLKKIPVIVLSLDRDPEVEKKCLELGANKYVPKPFSIEELMEIVEKLLN
597	MKSVLLVDDSETLRKVISFALESKGYSVIFAPDGKEALEKLKKSLPDLIIVDLSMPKMNGLELLKELKNNEKLKKIPVIVLSANRDPEVEKECLEAGADYYVPKPFSIQELLEICEKLLN
598	MKSVLLVDDSEVLRKIISFALESEGLSVVEAPDGKTALEKLKKFLPDLIILDLNMPPMNGFEVLKILKNDEKLKEIPVLVLSLDRSPEVEKRALELGANAYIPKPFSIRELMKVAKELLE
599	MKKVLLVDDSETLSKIISFALKKEGYEVILAPNGIEALEKLKEFLPDLIIVDLSMPPMNGFELLKILKNDEELKKIPVIVLSGNRDPEVEEEALKLGADYYVPKPFSIEELIKIIKKLLN
600	MKTILLVDDSETLRKIIKFALEKEGYKVIEAKNGKEALEKLKKFLPDLIIVDLLMPPMDGYTLLKILKENEKLKNIPVIVLSLNRDPEVEERCLELGANAYVPKPFSIEELIKIVKELLN
601	MKSVLLVDDSETLSKIISFALESEGYTVILAPNGVEALKKLEKQTPDLIIVDLNMPLMNGYELLKILKNDEELKKIPVVVLSLNRDEEVKERCLELGADKYVPKPFSIKELMEVVKKLLN
602	MKSVLLVDDSETLSKVISFALEKEGLTVILAPNGKEALEKLKEFLPDLIIVDLSMPPMNGFELLKILKNDEKLKKIPVIVLSADRSEEVKEKCLKLGANKYIPKPFSIEELMKVVKKLLN
603	MKSVLLVDDSETLRKIISFALESEGLSVVYAPNGIEALEKLKEFTPDLIIVDLSMPPMNGFELLEILKNDPELRKVPVVVLSADRSPEVKERALEAGADAYVPKPFSIKELMEIVKKLLE
604	MKTILLVDDSETLRKIISFALEREGYKVIFAPDGIAALEKLKKFLPDLIILDLRMPKMNGFEVLRILKEDEKLRKIPVIVISADRDPEVEERCLELGADAYIPKPFSIKELMEVVKKMLN
605	MKKVLLVDDSETLRKIISFALKKKGYEVIEAPNGKEALEKLKEELPDLIIVDLRMPPMNGYELLKILKEDEKLKKVPVLVLSGDRSPETEKRALELGANAYVPKPFSIEELMKIVEKLLN
606	MKKILLVDDSETMQKIISFALESRGYKVVFAPNGIEALKKLEEFLPDLIIVDLSMPPMNGFELLKILKNNEKLKKIPVVVLSADRDPEVEKRALELGANAYVPKPFSIQELMKIVEKLLN
607	MKTILLVDDSETLRKIISFALEKKGYKVIFAPNGIEALKKLEKELPDLIIVDLRMPPMNGLELLKILKNNEKLKKIPVIVLSLDRSEEVKKKCLEAGANAYVPKPFSIEELMKIVEKMLN
608	MKKILLVDDSEVLRKAISFVLESKGYSVVYAPNGIAALEKLKEFLPDLIIVDLRMPPMNGLELLKILKEDPELRKIPVVVLSLDRDPEVEKKALEAGADAYVPKPFSLEELMKIVEKLLN
609	KKSILVVDDSETLRKIITFALEKRGYTVVLAPDGVEALKKLEEFLPDLIIVDLRMPKMNGYELLKKLKNDEKLKEIPVLVISGDSSEEEKERALKLGANAYVPKPFSIEELMEIVEKLLN
610	MKSILLVDDSETLRKIISFALESEGYTVIYAKDGIEALEKLKEFLPDLIIVDLSMPKMNGFELLKKLKNDEKLKKIPVVVLSTNRDPEVEKECLELGANAYVPKPFSIKELIEIIKKLLN
611	MKSILLVDDSETLRKIIKFALEKEGYSVIEAKNGIEALEKLKEFLPDLIIVDLRMPPMNGYELLKILKNNEKLKNIPVIVLSADRDPEVEKKCLELGANKYVPKPFSIKELMEVVKKLLN
612	MKKVLLVDDSETLRKVIKFALESEGLTVVEAKDGKEALEKLKEFLPDLIILDLRMPLMDGFTVLKELKNDPKLKKIPVVVLSGDRDPEVEERCLELGANKYIPKPFSIKELMEVVKELLN
613	MKSVLLVDDSETLRKVITFALKSRGYTVVEAKDGIEALKKLEEFLPDLIIVDLRMPKMNGFELLKKLKNDEKLKNIPVIVLSADRDPEVKEKCLKLGANKYIPKPFSIQELMEVADKLLN
614	MKSVLVVDDSETLRKIITFALESRGYTVILAPNGIEALKKLEEFTPDLIIVDLRMPPMNGFELLKILKEDPELREVPVLVLSRDRDPEVEEEALELGANAYVPKPFSIKELMKIVEKLLN
615	MKTVLLVDDSETLAKIIKFALESEGLKVILAKNGKEALEKLKEFLPDLIIVDLNMPPMNGFEFLKILKNDEKLKNIPVIVLSKDRDPEVEEKALEAGANAYVPKPFSISELMKIVKKLLN
616	MKSILLVDDSKTLRKIISFALKSKGYTVIEAPNGKEALEKLKEFLPDLIIVDLNMPPMNGFELLKTLKNDEELKKIPVVVISRDRSPEVEKKALELGANKYIPKPFSIKELMEVVEELLN
617	MKKVLLVDDSETLRKIISFAIKKEGYEVIYAPNGIEALEKLKKFLPDLIIVDLSMPPMNGLELLKILKEDPELKNIPVLVLSANRDPEVKEECLKAGANAYIPKPFSIKELMEVIKKLLN
618	MKSILLVDDSETLSKVIKFALESEGYKVVLAKNGKEALEKLKKFLPDLIIVDLSMPPMNGLELLKKLKNDEKLKKIPVVVLSGDRSEEVKQKALEAGANAYIPKPFSIKELMEVVKKLLN
619	MKSILLVDDSETLSKIISFSLKKRGYTVTFAKDGIEALEKLKEFLPDLIIVDLSMPKMNGFELLKKLKNDEKLKNIPVIVLSGDRDPEVKEEALKGGANKYIPKPFSIKELMEVAEKLLN
620	KKSILLVDDSETLRKIISFALESEGYSVTFAPNGKEALEKLKEFTPDLIIVDLNMPPMNGLELLKILKNDEKLKKIPVVVLSGNRDPEIEKKCLELGANKYIPKPFSIEELMKVVKELLE
621	MKSVLLVDDSETLRKIISFALKSKGYTVIEAPDGIAALEKLKEFLPDLIIVDLRMPKMNGRELLKILKNDEKLRKIPVIVLSADRDPEVEEEALKLGANKYVPKPFSISELMEVAEEMLN
622	MKSILLVDDSETLRKIISFALEKRGYTVIEAKNGKEALEKLEESLPDLIIVDLSMPLMNGLELLRRLKEDEELRKVPVIVLSGNRDPEVEQRCLEAGADAYIPKPFSIEELMKVVEELLN
623	MKSILLVDDSETLRKIIKFALESEGYSVIEAKNGKEALKKLKEFLPDLIIVDLRMPIMNGYELLKILKEDEKLKKIPVVVLSLDRSPEVEEKALKLGANKYVPKPFSISELMKIVKELLN
624	KKSILLVDDSKTLRKIISFAIESEGYTVILAEDGVEALKKLEKELPDLIILDLSMPKMDGFEVLKRLKENEELKKIPVIVLSRDRTPEVEKKALEAGANAYIPKPFSIKELMEVIKKMLN
625	MKSVLLVDDSETLSKIISFALKKKGYTVTFAKNGKEALEKLKEFKPDLIIVDLSMPPMNGFELLKILKNDEELKNIPVIVLSKDRDPEVEKRALEGGADKYVPKPFSIKELIEIAEKLLN
626	MKSILLVDDSKTLRKIIKFALEKEGYSVIEAPNGIEALEKLKKFKPDLIIVDLSMPPMNGFELLKKLKNDEELKKIPVVVLSKDRDPEVKEKCLKLGANAYIPKPFSIEELMKVIKKLLN
627	MKKVLLVDDSETLNKVIKFALESEGWEVILAKDGVEALEKLKEFLPDLIICDLSMPKMNGYELLKKLKNDEKLKNIPVIVLSRNRDPEVKEKCLKLGANKYIPKPFSIKELIKVAKELLN
628	MKSILVVDDSETLNKIITFALEKEGYTVTLAPNGKAALEKLKKSLPDLIIVDLRMRPMNGLELLKVLANDPELREVPVVVLSGDRSPEVEQRALEAGASRYVPKPFSIEELIKIVKELLE
629	MKKILLVDDSETLRKIISFGLEKEGYEVIYAPNGIEALKKLEEFLPDLIIVDLSMPPMNGLELLKILKENEELKKIPVVVLSANSDPEVEKKALEAGANKYIPKPFSIKELLKVVKELLN
630	MKSVLLVDDSETLRKIISFALEKEGLSVTLAEDGIEALKKLEEFLPDLIIVDLRMPKMNGFELLKKLKNDEKLKNIPVVVISKDRSEEVKEKALKLGANKYIPKPFSIKELMEVIKELLN
631	MKSILLVDDSETLRKIISFALEKEGYTVVEARNGVEALEKLKEFLPDLIIVDLRMPPMNGFELLRTLAEDPKLRKIPVIVLSGDRDPEVEERALEAGANAYIPKPFSISELIETVKKLLN
632	MKSILLVDDSETLRKIISFSLEKEGYTVIYAPNGIEALKKLEEFLPDLIIVDLSMPPMNGFELLKILKENPELRDIPVVVLSGNRDPEVEKECLEGGANKYVPKPFSIEELMKIVKELLN
633	MKSILLVDDSETLRKIISFGLEKEGYSVIYAPNGKEALEKLKEFLPDLIIVDLSMPIMNGYELLKILKNDEELKKIPVVVLSLDRSPEVRQRALELGANKYVPKPFSISELMEVVKELLN
634	MKSVLLVDDSETLRKIISFALKSEGLTVKFAPDGIEALEKLKEFLPDLIICDLRMPKMNGLELLKILKNNEKLKNIPVIVLSRDRTEEVKEKCLEAGANAYIPKPFSISELMEVAKKLLN
635	MKKILLVDDSETLRKIISFALKKEGYEVIFAKDGIEALKKLKEFLPDLIIVDLRMPKMNGFELLKELKNDEERKKIPVIVLSGDRDPEVEEECLKLGADLYVPKPFSIEELMKKVKELLN
636	MKSVLLVDDSETLRKIISFALESKGYKVIYAPNGKEALEKLKEFKPDLIIVDLRMRPMDGFTLLKKLKEDEELKEIPVIVLSGDRDPEVKERCLELGANKYVPKPFSIEELMKIAEELLN
637	MKSVLLVDDSEVLRKIISFALESEGYEVIFAPNGIEALKKLEKFLPDLIIVDLSMRPMNGFELLKILKNDEKLKKIPVIVLSADSDPEVKERALKLGADKYVPKPFSISELMEIAKKLLN
638	MKSVLLVDDSETLSKIIKFALEKEGYKVVLAPNGKEALEKLEKFLPDLIIVDLRMPIMNGFELLKILKENEELKKIPVIVLSGDRSPEVEEECLKLGADKYIPKPFSIKELLKVAKELLN
639	MKKILLVDDSETLGKIISFALESKGYSVIFAKNGIEALKKLEEFLPDLIIVDLDMPPMNGFELLKILKEDPKLREIPVIVLSRNRDPEVEQRCLELGANKYIPKPFSIEELIKVVEELLN
640	MKTVLVVDDSETLRKIITFALEREGYKVILAPNGIEALEKLKEFLPDLIIVDLRMPPMDGFELLKILKEDEELKKIPVIVLSADRDPEVEKEALEAGADAYVPKPFSISELMEVAKKLLE
641	MKSILLVDDSETMRKIISFALESKGYSVIHAPNGIAALEKLEEQLPDLIIVDLRMPPMNGFELLRRLKEDPELRKIPVVVLSGDRDPEVEERCLEAGADAYVPKPFSIEELMEIVEKLLN
642	MKSVLLVDDSETLSKIISFALESEGYSVTLAKDGVEALEKLKESLPDLIIVDLKMPKMNGYELLRILKNDEKLKKIPVIVLSGDRSPEVEEKALELGANKYIPKPFSIKELIKVAKELLN
643	MKSILLVDDSETLRKIITFALESKGYTVVEAKNGIEALEKLKEFLPDLIICDLSMPPMNGFELLKKLKEDEKLKEIPVVVLSGNRDPEVEEKCLEAGANAYIPKPFSIKELIEVIEKLLN
644	MKSILLVDDSETLAKIISFALEKEGYTVTLAPNGKAALEKLKKELPDLIIVDLSMPPMNGFELLKILKEDEKLKEVPVLVLSADRDPEVKQRALELGASAYIPKPFSIQELMKVVKELLN
645	MKSVLLVDDSEVLRKIISFALESEGLKVVFARNGKEALEKLKKFLPDLIILDLRMPPMDGLTLLKILKEDEKLKNIPVIVLSADRDPEVEKEALEAGANKYIPKPFSIEELMKVVKELLN
646	MKSVLVVDDSETLNKIITFALESEGYTVTLAKDGIEALEKLKKELPDLIILDLNMPKMNGFEVLEILKNDEKLKDIPVIVLSADRSPEVKEKALKAGANKYIPKPFSISELIKVAKELLN
647	MKSVLLVDDSETLRKIISFALKKRGYTVVEAKDGKEALEKLKEFLPDLIIVDLSMRPMNGLELLKILKEDEKLKNIPVIVLSGDRDPEVEKRCLEAGANAYIPKPFSIQELMEVVDKLLN
648	MKSILLVDDSETLRKIISFALEKRGYKVVLAKNGKEALEKLKKFLPDLIIVDLRMPPMNGFELLEILKNDEKLKNIPVVVLSADRTPEVKEKALEAGADAYIPKPFSIEELMEVIEKLLN
649	MKKVLVVDDSETLRKIITFALEKKGYSVILAPNGKEALEKLKKELPDLIICDLNMPPMNGFELLKILKEDEELKKIPVIVLSLDRDPEVKEECLKLGANYYVPKPFSIKELMEIAEKLLN
650	MKTILLVDDSETLRKIIKFALEKEGYKVIEAPNGVEALEKLKEFLPDLIIVDLNMRPMNGFELLEILKNDEELKKIPVVVLSLDRDPEVEERCLKAGANYYVPKPFSIEELIKVIKKLLN
651	MKKVLVVDDSETLRKVITFALESKGYEVILAKDGIEALKKLEKELPDLIIVDLRMPKMNGYELLKILKNNEKLKNIPVVVISADRSPEVEKKALELGANYYIPKPFSIKELMEVIEKLLN
652	MKSVLLVDDSETMRKIIKFALESEGLKVVEAPNGIEALKKLEEFLPDLIIVDLSMPPMNGFELLKILKENEELKEIPVIVLSADRDPEVKERCLELGANAYIPKPFSIKELMEVVKKLLN
653	MKSVLVVDDSETLRKIITFALEKEGYTVVLAPNGKEALEKLKEFLPDLIIVDLDMPPMNGLELLKILKNDEKLKNIPVIVLSKNRDPEVEKEALEAGADAYIPKPFSISDLIEVVKKKLN
654	MKSILLVDDSETMSKIISFAIEKRGYKVIFAKNGIEALEKLKKELPDLIIVDLRMPPMNGFELLKKLKEDEELKKIPVIVVSADRSPEVEKEALELGADAYIPKPFSIEELMEVIEKLLN
655	MKSVLLVDDSEVLRKIISFAIESEGYTVIYAKDGIEALEKLKKSLPDLIIVDLSMPKMNGYELLKILKEDEKLKNIPVIVLSGNRDPEVEEKALKLGANKYIPKPFSIKELMEVIKKLLN
656	MKKILLVDDSETMSKIIKFALEKEGYKVVLAPNGIEALKKLEKFLPDLIIVDLSMPPMNGLELLKILKNDEKLKEIPVVVLSADSDPEVEKEALELGANKYIPKPFSISELIKVVKELLN
657	MKSILLVDDSEVLSKVISFALESEGYTVTLAKNGIEALEKLKEFLPDLIICDLRMPPMNGYELLKILKNDEKLKKIPVIVISGDRDPEVKKKALELGADYYIPKPFSIQELMKVVKKLLN
658	MKSILLVDDSKTLRKVIKFALESEGYTVVEAPNGKEALKKLEKFLPDLIIVDLDMPPMNGFELLKILKNNEKLKNIPVIVLSRDRSEEVKERALKLGANYYIPKPFSIKELMEVVKKLLN
659	MKSVLLVDDSETMRKIISFGLEKRGYSVITAKNGIEALEKLKESLPDLIIVDLRMPLMNGFELLKILKNNEELRNIPVIVLSGDRDPEVEEEALKAGANAYVPKPFSIQELMEIAEKLLN
660	MKTILLVDDSETLRKIITFALESKGYKVIEAPNGKAALEKLKKFLPDLIIVDLSMPPMNGLELLKILKNDEKLKKIPVVVLSLDRSPEVEQKCLEAGANAYVPKPFSIEELIEIVEKLLN
661	MKSVLLVDDSETLRKIISFALKSRGYTVIEAPNGIEALEKLKEFLPDLIIVDLSMPPMNGYELLKILKENEELKKIPVIVLSADRDPEVEEKALELGANKYIPKPFSIKELMEEVEKLLN
662	MKTILLVDDSEVLRKVIKFALESKGYKVIEAPNGIEALKKLKEFLPDLIIVDLRMPPMNGFELLKILKNDEKLKKIPVVVLSGDRDPEVEKKALEAGADAYIPKPFSIEELMEVVEKLLN
663	MKSVLLVDDSETLRKIISFALESEGLTVTLARNGKEALEKLKKFLPDLIILDLSMPPMNGLEVLKILKNNPELKNIPVVVLSINRDPEVEKECLEAGADAYIPKPFSISELMEVVKKLLN
664	MKSVLLVDDSETLRKIISFALESKGYTVKFAPDGKEALEKLKEFTPDLIIVDLRMPKMNGFELLRELKNDPKLKEIPVVVISADRDPEVEQRALELGADAYVPKPFSIKELMEIVEKLLN
665	MKKVLVVDDSETLQKVITFALESEGLEVILAPNGIEALKKLEKFLPDLIIVDLSMPPMNGFELLKILKENEELKKIPVIVLSGNRDPEVEEKCLKLGANKYIPKPFSIKELMEVVKELLN
666	MKTILLVDDSEVLRKIISFALEKEGYKVIYAPNGKAALEKLKEFLPDLIIVDLSMPPMNGFELLKILKNNEELKKIPVVVLSANRDPEVEKKALELGANKYVPKPFSIEELMKIVKELLE
667	MKSILLVDDSETLSKIISFALESEGYKVILAKNGKEALEKLEKELPDLIILDLSMPPMNGFELLKILKNDEKLKEIPVVVISRDRSPEVEKRALEAGADAYVPKPFSIKELIEIIKKLLN
668	MKSVLLVDDDEVLSKIIKFALESEGYTVKLAKNGKEALEKLKEFLPDLIIVDLSMPPMNGFELLKVLKEDEKLRKIPVIVLSRDRDPEVKERALELGANYYIPKPFSIKELIEVAKKLLN
669	MKSVLLVDDSETLRKIISFALESEGYTVTYAKNGKEALEKLKEFLPDLIIVDLSMPEMDGFELLKILKEDEKLKKIPVVVLSANRDPEVEEKALELGANKYIPKPFSISELMKVVKKLLN
670	MKKILLVDDSETMRKIISFALKKRGYEVIEAPNGKEALEKLKEFLPDLIILDLNMPPMNGFEVLKILKNDEKLKKIPVIVLSGDRSPEVKKKCLELGANKYIPKPFSIKELMEVVEELLN
671	MKKILLVDDSETLRKIIKFALEKRGYKVVEAPNGIEALKKLKEFLPDLIICDLSMPPMNGLELLKILKNDPKLKEIPVVVLSGNRDPEVEQKCLEAGANAYVPKPFSIQELMKIVEKLLN
672	MKTVLLVDDSKTLQKIISFALEKEGYKVIRAPDGIEALKKLEEFLPDLIIVDLRMPKMNGLELLKILKNNEKLKKIPVIVISGDRDPEVEKECLEAGANKYIPKPFSIKELMEVAKKLLN
673	MKKILLVDDSETLRKIISFALESKGYSVILARNGIEALEKLKEFLPDLIILDLRMPPMNGFEVLKILKNDEKLKNIPVIVLSGDRDPEVEKKALELGANAYIPKPFSIKELIEVVEKLLN
674	MKSILLVDDSETLRKIISFSLEKRGYKVVLAPNGIEALKKLEKFLPDLIILDLSMRPMNGFEVLKKLKNDEKLKKIPVVVLSGNRDPEVEEKALELGANKYIPKPFSIEELMKVVEELLN
675	MKSVLLVDDSETLAKIISFALEKEGYSVIFAPNGKEALEKLKEFLPDLIIVDLRMPPMNGFELLKILKNDEKLKNIPVLVISGDRDPEVEEEALKLGANAYIPKPFSIKELMEVVKKLLN
676	MKTVLLVDDSETLRKIISFGLESEGYSVIFAKNGIEALKKLEEFLPDLIIVDLSMPPMDGFTLLKILKNDEKLRNIPVIVLSGDRSPEVEKRCLELGANAYIPKPFSISELLKVAKELLN
677	MKKVLLVDDSETLRKIIKFALEKEGYEVVLAPDGVEALEKLKEFLPDLIIVDLSMPKMDGLTLLKILKNDEKLKEIPVIVLSRDRSPEVEQKALEAGANAYIPKPFSIEELMKVAKELLN
678	MKSVLLVDDSETLSKIISFALESKGYKVVRAKDGKEALEKLKEFLPDLIIVDLRMPKMNGFELLKILKEDEKLKNIPVIVISGDRSEEVKEKCLELGANKYIPKPFSISELIKVAEKLLN
679	MKKVLLVDDSETLRKIISFSLEKEGYSVITAPNGIEALKKLEKFLPDLIIVDLSMRPMDGLTLLERLKNDEKLKKIPVIVLSKDRDPEVKKRCLEAGANKYIPKPFSIKELMKVAKKLLN
680	MKSVLLVDDSETLNKIISFGLESKGYTVIRAKNGIEALEKLKKFTPDLIIVDLSMPLMNGFELLKILKNDEKLKNIPVIVLSKDSTPEVEKKCLELGANYYVPKPFSISELMKIAEKLLN
681	MKTILLVDDSETLSKIIKFALESKGYKVILAKDGIEALKKLEEFLPDLIILDLNMPKMNGLEVLKILKENEKLKKIPVVVLSLDRDEEVKEKCLELGADKYIPKPFSIQELIKVIEELLN
682	MKKILLVDDSETLRKIISFALKKEGYEVVYAPNGIEALEKLKEFLPDLIIVDLNMPPMNGFELLKTLKNDEKLKNIPVLVLSLDRDPEVEEKALKLGANYYIPKPFSIEELIKKVKELLE
683	MKSVLLVDDSETLRKVIKFALESKGYTVIEAKNGIEALEKLKESLPDLIIVDLSMPPMNGEEFLKILKNDEKLKKIPVIVLSLDRDPEVEKRALELGADAYIPKPFSIKELLEVAEKLLN
684	MKSVLLVDDSETMRKIISFALESEGYKVIHAENGIEALKKLEEQLPDLIIVDLRMPKMNGLELLKKLKEDPELKKIPVVVLSLDRSPEVEKECLEAGANAYIPKPFSIQELMEVVKKLLE
685	MKKVLLVDDSETLAKIISFALKKRGYEVILAPDGVEALEKLKEELPDLIIVDLRMPKMDGYELLRRLREDEELRKVPVIVLSLDRDPEVKQRCLELGADAYIPKPFSIEELMEVAEKLLN
686	MKSVLLVDDSETLRKIISFALESKGYKVIFAPNGIEALKKLEKFLPDLIIVDLNMRPMNGLEFLKKLKEDEELKDIPVVVLSRDRSPEVEEECLEAGANAYIPKPFSISELMKVIEKLLN
687	MKSVLLVDDSETLRKIISFAIESEGYTVVYAKNGKEALEKLEKFLPDLIILDLRMPPMNGEEVLKILKENEELKNIPVVVLSGDSSPEVKERALKLGANKYVEKPFSIKELMKIIKELLN
688	MKTVLLVDDSKTLQKIISFALESKGYKVILAPNGKEALEKLKKFLPDLIILDLSMPPMNGLEVLKILKNDPKLKNIPVIVLSKDRDPEVEEKCLKAGANKYVPKPFSIEELMEIVEELLN
689	MKKILLVDDSKTLRKVIKFALEKKGYEVIEAPNGKEALEKLKEFKPDLIIVDLRMPPMNGFELLKILKNDEELKNIPVIVLSGDRSPEVEKKALELGADKYIPKPFSIEELMKVVEKLLN
690	MKSILLVDDSETLRKIISFALKSKGYTVVFAPDGIEALEKLKKFLPDLIIVDLRMPKMNGFELLKILKEDEKLKKIPVVVLSGDSDEEVKKEALELGANKYIEKPFSIKELMKVIEKLLN
691	MKKVLLVDDSETLRKIISFALEKEGYSVVFAPNGKEALKKLEEFLPDLIIVDLNMPIMNGYELLKKLKNDEKLKNIPVVVLSLDRDPEVEKKCLELGANKYVPKPFSIKELMKIVKELLN
692	MKKILLVDDSETLRKIISFAIEKEGYSVIEAPDGKEALEKLKEFLPDLIIVDLNMPKMNGYELLKILKEDEKLKKIPVIVLSRNRDPEVEEKCLELGANKYIPKPFSIKELMEEIKKLLN
693	MKSILLVDDSETLQKIISFGLEKRGYKVVRAKDGKEALEKLKEFKPDLIIVDLSMPLMNGFELLKILKNDEELKNIPVVVLSGDRDPEVEEKALKLGANAYIPKPFSIEELMKVVEELLN
694	MKTILLVDDSETLNKIISFAIESEGYKVILAKDGIEALEKLKKFIPDLIIVDLNMRPMNGFELLKILKNDEKLKNIPVIVLSLDSDPEVKEKALKLGANKYVEKPFSIKELMKIIKELLN
695	MKSILLVDDSETLRKVIKFALEKEGYTVVEAPNGKEALEKLKEFLPDLIIVDLRMPPMDGLELLRELKEDPERREIPVIVLSRDRTPEVEERALEAGASAYIPKPFSIKELMEVVKKLLE
696	MKKILLVDDSETLRKVIKFALEKEGYEVIEAPNGKEALEKLEEFTPDLIIVDLSMPPMNGFELLKKLKENEEWRKIPVVVLSGDRSPEVEERALELGANKYVPKPFSISELMKVVKELLE
697	MKKILLVDDSETLSKIIKFALESEGYEVVLARNGIEALEKLKEFLPDLIILDLSMRPMDGFTLLKKLKEDPELKNIPVLVISADRTEEVKQKALEAGANAYVPKPFSIKELIEIIKKLLN
698	MKSVLVVDDSETLNKIITFGLESEGYSVILAPNGKEALEKLKEFLPDLIIVDLRMPIMNGLELLKILKEDEKLKNIPVVVISKDRTPEVKEKALEAGANKYVPKPFSIKELLEIVKELLN
699	MKTVLLVDDSETLRKIISFALEKEGYKVVFAPDGKEALKKLEKFLPDLIIVDLNMPKMNGFELLKILKEDEKLKNIPVIVLSADRDPEVEEKCLELGADYYVPKPFSIQELIEIAKKLLN
700	MKSILLVDDSETMQKVISFALESEGYKVIRAKNGIEALKKLEKFLPDLIIVDLNMPPMNGFELLKELKNNEELKKIPVVVLSADSSEEVKERCLELGANYYIPKPFSIKELMEVVKKLLN
701	MKSILLVDDSKTLRKIISFGLESKGYKVIYAEDGIEALEKLEEFLPDLIIVDLSMPKMNGFELLKKLKEDEKLKKIPVIVLSKDRTPEVEEKCLELGADKYIPKPFSISELMEVIDELLN
702	MKSVLLVDDSETLRKVISFALESEGWTVVYAPNGIEALKKLEKFLPDLIIVDLRMPKMNGLELLKILKNNEELKKIPVIVLSGDRDPEVEEKCLKAGANAYVPKPFSISELIEIAKKLLN
703	MKSVLLVDDSETLQKVISFAIESRGYSVVRARNGIEALKKLEKFLPDLIIVDLSMRPMDGLTLLKKLKEDEKLKKIPVIVLSANRDPEVEEKCLEAGADKYIPKPFSISELMEVIEELLN
704	MKSILLVDDSETLSKIISFALEKKGYKVVFAPNGIEALKKLEEFKPDLIIVDLSMPPMNGFELLKILKNNEELKNIPVVVISKDSSPEVKEECLKAGANAYVEKPFSIEELMKIIEKLLN
705	MKKVLLVDDSETLAKIIKFAIESKGYTVILAPNGKAALEKLKKELPDLIIVDLSMPPMNGFELLKELKNDEELKKIPVVVLSLDRSEEVKEKCLEAGANKYVPKPFSISELMKIIEKLLN
706	MKSVLLVDDSETLAKIISFALESKGYTVVYAKDGIEALEKLKEFLPDLIILDLSMPKMNGFEVLRILKENEELRKIPVIVLSGDRDPEVEKRALEAGANAYIPKPFSIQELMKVAEKLLN
707	MKSVLLVDDSKTEQKIITFALEKEGYTVIRAPNGKEALEKLKEFLPDLIIVDLSMPPMNGLELLKILKNDPELKKIPVIVLSGDRSPEVEKEALEAGANKYIPKPYSIEELMKVAKELLN
708	MKSVLLVDDSETMQKIITFVLESKGYTVTRAKNGKEALEKLKEFLPDLIIVDLRMPIMNGLELLKILRNDPKLKNIPVVVLSLDRDPEVEEEALEAGANAYVPKPFSTKELMEIVEKLLN
709	MKTVLLVDDSETLRKIISFALESKGYKVIYAKNGIEALEKLKEFLPDLIIVDLRMPPMNGYELLKILKEDEELKKIPVIVLSADRSPEVKERALELGADAYIPKPFSIEELIEVAEKLLN
710	MKKILLVDDSEVLSKIISFALESKGYSVILAKNGIEALEKLKKFLPDLIIVDLRMPKMNGFELLKILKEDEELKNIPVIVLSADRDPEVEKKCLELGANKYVPKPFSIEELMKEVEKLLN
711	MKKILLVDDSETLRKIITFALESEGYSVVLAPNGIEALEKLKEFKPDLIIVDLRMPPMNGFELLKILKNDEELKNIPVIVISADRDPEVEKKCLELGANAYVPKPFSIEELIKIVKKLLN
712	MKSILLVDDSETLRKIISFALESEGYSVVFAPNGIEALKKLEEFLPDLIILDLSMPPMNGFEILKILKENEELKKIPVIVLSADSDPEVEKKCLEAGANAYVPKPFSIKELMEIVKKLLN
713	MKSVLLVDDSETLQKIISFALEKEGYTVTLAPDGIEALEKLKKFLPDLIILDLNMPKMNGFEVLEILKNNEELKKIPVIVLSADRDEEVKEKALELGADKYIPKPFSITELMEVAKKLLN
714	MKKVLLVDDSETLSKIISFALEKEGYKVVRAKNGKEALEKLEKFLPDLIIVDLSMPPMNGLELLKKLKENEELKNIPVIVLSGDSSPEVEEECLKAGANAYVPKPFSIKELIEIAKKLLN
715	MKTVLLVDDSETLQKIISFALEKEGLTVVRAPDGIEALEKLKEFLPDLIIVDLSMPPMNGLELLKILKENEELKNIPVVVISGNRDPEVEKECLEAGANAYVPKPFSIKELMEIVKKLLN
716	MKSVLLVDDSETLSKIISFALEKEGYSVVLAKDGVEALRKLKEFLPDLIIVDLRMPKMDGLELLRELAEDPELREIPVVVLSADRSPEVEKEALEAGADAYIPKPFSIEELMKVVRELLE
717	MKSVLVVDDSETMRKIITFALESKGYTVVLAPNGKEALEKLKKFLPDLIIVDLSMPPMNGLELLRILAEDEELREIPVIVLSLDRSPEVEQRCLEAGAKAYVPKPFSIQELIEIVEKLLN
718	SKSVLLVDDSKTLRKIIKFSLEKEGYTVIEAPNGIEALEKLKESLPDLIIVDLSMPPMNGLELLKILKNDPKLKKIPVVVLSADRSPEVEEECLKAGADKYIPKPFSISELMEVVKELLN
719	MKSILLVDDSETLSKIISFAIEKEGYKVIKAPNGIEALEKLKKFLPDLIIVDLRMPKMNGFELLKILKNDEKLKNIPVIVLSGDRDPEVEKECLELGANKYIPKPFSIKELMEVIKKLLN
720	MKSVLLVDDSETLRKIITFALESEGYKVILAPNGKEALEKLKEFLPDLIILDLRMRPMNGFEVLKILKENEELKKIPVIVLSGDRSPEVEEKCLKLGANKYVPKPFSIKELMEIVKELLN
721	MKKILLVDDSEVLRKIIKFALESKGYSVIEAPNGIEALEKLKEFLPDLIIVDLRMRPMNGFEFLKILKNDEKLKNIPVVVLSGDRSPEVEERALKAGADKYVPKPFSIKELIEIIEELLN
722	MKSVLLVDDSETLRKVISFALESEGYTVVFAPDGIEALEKLKEFLPDLIIVDLDMPKMNGYELLKILKEDEKLKNIPVIVLSRDRSPEVEEKALELGADAYVPKPFSIKELIEIAKKLLN
723	MKSILLVDDSETLRKIIKFALEKKGYTVVEAPDGISALEKLKEFLPDLIIVDLSMPKMNGFELLKILKNDEKLKKIPVIVISKNRDPEVEKKALELGANAYVPKPFSIEELMKIVEKLLN
724	MKSVLLVDDSKTLSKVIKFALESEGLKVILAENGKEALEKLKEFLPDLIIVDLNMPPMNGFELLEILKNDEKLKKIPVIVLSRNRDPEVEKRCLELGANAYVPKPFSIKELMEIVKKLLE
725	MKKVLLVDDSETLRKIISFGLEKEGYSVVEAKDGIEALEKLKKFTPDLIIVDLRMPKMNGFELLKILKEDEKLKKIPVIVLSADRDPEVEKRALELGANAYVPKPFSISELMEIAKKLLE
726	MKSVLVVDDSETLRKVITFALESEGYTVTWAKNGVEALKKLEKFLPDLIIVDLLMPPMNGFELLKKLKEDPKLKDIPVVVLSGRRDPEVEKEALEAGANAYIPKPFSIKELMEVVKKLLN
727	MKKVLLVDDSETLRKIISFALKKEGYEVIFAKNGKEALEKLEKELPDLIIVDLRMPPMDGFELLKKLKEDPKLKKIPVVVISADRSPEVEKEALELGADAYVPKPFSIEELMEIVKELLE
728	MKSVLLVDDSETLSKIISFALESEGYTVIRAPNGKEALKELEKRLPDLIILDLSMPPMNGRELLKKLKENEELKKVPVIVLSGDRSPEVEEEALKLGADAYIPKPFSIKELMEVAKKLLN
729	MKSILLVDDSETLRKIISFGLEKEGYKVILAKNGKEALEKLEKELPDLIIVDLRMRPMNGFELLKILKNDEKLKNIPVIVLSRDRDPEVEEKALELGANKYIPKPFSIEELMKVVKELLN
730	MKSILLVDDSETLSKIITFALESKGYTVTLAPNGIEALKKLEKFTPDLIILDLRMPLMNGYELLRILKENEKLKNIPVIVLSGDRDPEVEERCLELGANAYIPKPFSIEELIKVAEKLLN
731	MKKVLLVDDSETMRKIISFALKSRGYEVIYAKNGIEALKKLEEFLPDLIILDLRMPPMNGFEVLKILKENEKLKKIPVIVLSGDRDPEVKEEALKLGANAYIPKPFSIEELMKVCEKLLN
732	MKSILLVDDSETMSKIISFALEKKGYTVIFAKNGVEALKKLEEFTPDLIIVDLSMPPMNGYELLKILKENEKWKNIPVIVLSGDRDPEVEKKCLELGANKYIPKPFSIKELIKVIEELLN
733	MKSVLLVDDSETLRKIISFAIKSEGYSVVYAKNGIEALKKLEKFLPDLIIVDLNMPLMNGFELLKKLKEDEKLKKIPVIVLSLDRDPEVEKECLELGADAYIPKPFSIKELMEVAKKLLN
734	MKSILLVDDSEVLRKIISFALKSKGYKVVYAPNGIEALKKLEKFTPDLIILDLRMRPMNGFEILKILKNNEKLKNIPVIVLSGDRDPEVEKKALELGANYYIPKPFSIKELMEVVEKLLN
735	MKKVLLVDDSETLQKIISFAIEKKGYKVIKAKNGIEALKKLEEFLPDLIIVDLSMPPMDGFELLKKLKEDEELKKIPVIVISKDRSPEVEKEALELGANAYIPKPFSIEELMKEIEKLLN
736	MKSILLVDDSETLAKVISFALEKEGYTVTLAKDGIEALEKLKEFLPDLIIVDLRMPKMNGLELLKILKEDEKLKKIPVIVLSRDRSEEVKKKCLEAGANAYIPKPFSIKELMEVVKKLLN
737	MKTVLLVDDSETLRKIISFALESKGYKVIFAPNGKEALKKLEKFLPDLIIVDLRMPPMNGFELLKILKENPELKNIPVIVISGDRTPEVEKEALELGADKYIPKPFSIEELLKVVDELLN
738	MKSILLVDDSETLRKIISFALESEGYSVIYAKNGKEALEKLKEFLPDLIILDLNMPPMNGREVLKILKNDPKLKNIPVIVLSADRSPEVEKEALELGANYYIPKPFSIKELIEVAKKLLE
739	MKTVLLVDDSETLAKVIKFGLEKEGYKVILAKNGIEALKKLEEFLPDLIIVDLNMPPMNGFELLEILKNDEKLKEIPVVVLSADRSEEVKKRALELGANAYVPKPFSIKELLEIVKKLLN
740	MKSVLLVDDSETLSKVIKFALEKEGYTVVLAPNGKEALEKLEKFLPDLIIVDLRMRPMNGFEFLKILKENEELKKVPVVVISLDRSPEVEKKALELGANAYIPKPFSIKELMKVVKELLN
741	MKSILLVDDSETLRKIISFALEKEGYTVIFAPNGKEALEKLKEQLPDLIIVDLDMPPMNGFELLKELKNDEKLKEIPVIVLSRDRSPEVEERCLEAGANKYVPKPFSIEELMKIVKELLN
742	MKSVLLVDDSETLRKIISFALEKEGYTVVYAPNGIEALEKLKEFLPDLIIVDLRMPPMNGFELLRILKNDEKLKNIPVIVLSGDRSPEVEKRALELGANAYIPKPFSIEELMEVAKKLLN
743	MKKILLVDDSETLRKIISFALESKGYSVIYAKNGKEALKKLEKELPDLIIVDLRMRPMNGLELLKILKNDEKLKKIPVIVLSADRSPEVEKEALEAGANKYVPKPFSIKELIEIIEKLLN
744	MKSVLLVDDSETLRKIISFAIESEGYTVVFAKDGIEALEKLEEFKPDLIIVDLSMPKMNGFELLKKLKENEELKNIPVVVISTNRDPEVEKKALELGANKYVPKPFSIKELMEIIKKLLN
745	MKSVLLVDDSETLRKVISFALESRGYTVVYARNGKEALEKLKEFKPDLIIVDLRMPPMDGFEFLKKLAEDEELKNIPVVVLSADRDPEVEERALKLGAKAYIPKPFSIKELMEVVEKLLN
746	MKSVLLVDDSETLRKIISFALKSKGYTVIFAPNGIEALEKLKKFKPDLIIVDLSMPPMNGFELLKILKNDEELKNIPVIVISADTSEEVKEKALKLGANYYIPKPFSIKELMEVVEKLLN
747	MKKILVVDDSETLRKIITFALEKEGYSVVLAKNGKEALEKLKKFLPDLIIVDLRMRPMNGFELLKILKNDEKLKNIPVVVISADSSPEVEEKALELGANYYVPKPFSIKELMEIIKKLLN
748	MKTVLVVDDSETLNKIITFVLESKGYKVILAKNGVEALEKLKKFLPDLIIVDLRMPPMNGFELLKRLKEDPELKKIPVIVLSRDRSPEVEKRALELGADAYIPKPFSLQELMEVAEKLLN
749	MKSILLVDDSETLRKIISFAIESKGYTVVFAPNGKEALEKLKKFLPDLIIVDLRMPIMDGFTLLEILKNDEKLKKIPVIVLSLDTDPEVEEKCLKAGANYYIPKPFSIEELMEVIEKLLN
750	MKTVLLVDDSKTLSKIIKFALESKGYKVILAPNGKEALKKLEKFLPDLIIVDLNMPLMNGYELLKILKEDPKLKNIPVIVLSKDRSPEVEEKALKLGANAYIPKPFSIEELMEVAEKLLN
751	MKKILVVDDSETLRKIITFALKKEGYEVILAKNGKEALEKLEKFLPDLIICDLSMPLMDGFTLLKKLKNDEELKKIPVIVLSGNRDPEVEKECLELGADAYIPKPFSIEELMKVAKKLLN
752	MKKVLLVDDSETLQKIIEFALKSEGYEVVRARNGIEALEKLKEFLPDLIIVDLRMPPMNGYELLRILKEDPELRKVPVIVLSADTDPEVEERALELGADAYIPKPFSIKELMEVVKKLLE
753	MKSILLVDDSETLRKIISFALEKEGYTVIYAPNGKEALEKLKETLPDLIIVDLSMPLMNGFELLKILKNDEKLKKIPVIVLSGNRDPEVEEEALKAGANAYIPKPFSIKELIKVVKKLLN
754	MKTVLVVDDSETLNKIITFAIEKRGYSVILAPNGKEALEKLKEFLPDLIILDLNMPPMNGLEVLKILKNDEKLKKIPVIVISRDRDPEVEKKCLEAGANAYIPKPFSIEELMEVIEKLLN
755	MKTVLLVDDSETLRKVVSFALEKEGYKVVYAPNGIEALEKLKEFKPDLIIVDLNMPPMNGFELLEKLKNDEELKNIPVIVLSLDRDEEVKERALELGANAYIPKPFSIKELMEVVKKLLE
756	MKSVLLVDDSETLRKIISFALEKEGYTVVTAPNGVEALEKLKEFLPDLIIVDLSMPPMNGYELLKILKEDEKLKKIPVVVLSRNRDPEVEEKALKLGANKYVPKPFSIEELMKVVKELLN
757	MKKVLLVDDSETLRKVITFALKKEGYEVVEAKNGIEALEKLKEFLPDLIIVDLNMPPMNGFELLKILKNDEKLKNIPVIVLSRDRSPEVEKKALELGADAYIPKPFSIKELIEVAKKLLE
758	MKSILLVDDSETLRKIISFGLEKEGYKVILAPDGIEALEKLKEFLPDLIIVDLSMPKMNGLELLKILKNDEKLKNIPVIVISANRDPEVEKECLEAGADKYIPKPFSIKELLEVAKKLLN
759	MKSVLLVDDSKVLRKIISFALKSKGYTVVEAKNGKEALEKLKEFTPDLIIVDLRMPPMNGFELLKILKNDEKLKKIPVIVLSADRSPEVEEKALKLGANAYIPKPFSIQELMEVAEKLLN
760	MKSVLLVDDSETLRKIISFILEKEGLTVVEAPNGIEALKKLEEFLPDLIIVDLRMPLMDGFEFLKKLKEDEKLKKIPVVVLSTDRTPEVEEEALKLGANAYVPKPFSPKELMEIIKKLLN
761	MKTVLVVDDSEVLRKIVTFALESRGYKVILAKNGKEALEKLKEFLPDLIIVDLRMRPMNGFELLKILKENEELKKIPVVVLSGDRDPEVEKKALEAGADAYVPKPFSIQELMEIVEKLLN
762	MKSILLVDDSETLAKIIKFALESKGYSVTLAPDGRAALEKLKEFLPDLIIVDLAMPKMDGLELLRILKNDEKLKKIPVLVLSLNRDPEVEKECLEAGANAYIPKPFSIQELIKEVEKLLN
763	MKSVLLVDDSETLNKIISFALEKKGYSVVLAPDGKAALEKLEEFLPDLIILDLRMRPMNGLEVLKILANDPELRNIPVIVLSADRDPEVKKKCLEAGANAYVPKPFSISELIEIAEKLLN
764	MKSILLVDDSETLSKIITFALKSKGYTVTLAKDGIEALKKLEKFLPDLIIVDLRMPKMNGFELLKILKNNEKLKKIPVIVLSGDSSPEVKERALELGADAYVEKPFSIKELMEIAEKLLN
765	MKTVLLVDDSKTLGKIISFSLEKEGYKVIFAPNGIEALKKLKEFTPDLIIVDLRMPPMNGLELLKILKNDPKLKNIPVIVISKDSTPEIKKKCLEAGANAYVEKPFSIKELMEVAKKMLN
766	MKKVLLVDDSKTLRKIIKFGIEKKGYEVIEAPNGKEALEKLKEFLPDLIIIDLSMPPMNGFELLKILKEDEKLKEIPVIVLSLDRTPEVEKKCLEAGANLYIPKPFSIKELMKKIEELLN
767	MKSVLLVDDSETLRKIISFALKSEGLTVVYAPNGKEALEKLEKFLPDLIIVDLSMPPMNGFELLKILKNDEERKKIPVIVLSANRDPEVEKKALELGANAYVPKPFSINELMKIAKKLLE
768	MKKVLLVDDSETLSKIISFALKSRGYEVILAKNGKEALEKLKEFLPDLIIVDLSMPPMNGYELLKILKNNEELKKIPVVVLSGDRDPEVEKRALELGADAYIPKPFSIKELMEVVEKLLN
769	MKTVLLVDDSETLRKIISFALESEGYKVVFAPNGIEALKKLEEFLPDLIIVDLSMPPMNGFELLKKLKEDEKLKKIPVIVISADRTPEVEEKALKGGANAYVPKPFSISELIEIAKKLLN
770	MKSILLVDDSKTLRKIIKFALEKKGYTVIEAKDGIEALEKLKEFTPDLIIVDLSMPKMNGLELLKILKNDEELKKVPVIVLSADRSPEVEEECLKAGADLYVPKPFSIEELIENIEKLLS
771	MKTILLVDDSETLRKIISFALEKEGYKVIYAPDGKEALEKLEKFLPDLIILDLSMPLMNGFELLKKLKEDEKLKNIPVVVLSLDRDEEVKEEALKLGANKYIPKPFSIEELMKVIKELLE
772	MKKILVVDDSETMRKIITFALESKGYSVILAKNGIEALEKLKEFKPDLIIVDLRMPPMNGFEFLKKLKEDEELKNIPVIVLSGDRSPEVKERCLKAGANAYVPKPFSIEELVKIIEKLLN
773	MKKVLLVDDSETLQKVIEFALKSKGYSVVRAPNGKEALEKLEKFLPDLIICDLSMPPMDGLELLKKLKNDEKLKEIPVIVLSGNSDPEVEKKCLEAGANAYIPKPFSIKELMKVVEKLLN
774	MKTILLVDDSETLRKIISFVLESKGYTVVFAPNGKEALEKLKEFLPDLIILDLSMPPMNGLEVLKILKENEELKKIPVIVISADSSPEVEELALEAGADAYVPKPFSTKELMEIVEKKLN
775	MKKILVVDDSEVLRKIITFALKKEGYSVIEAKNGIEALKKLEKFLPDLIIVDLNMPLMNGKELLKILKNDEELKKIPVVVLSLDRDPEVEKEALELGANKYVPKPFSIKELMKIVKELLN
776	MKSVLLVDDDETLQKIISFALESEGYKVIRAKNGVEALKKLEEFLPDLIIVDLRMPPMNGYELLKKLKEDEKLKKIPVIVLSADRSPEVEKKALELGANKYVPKPFSIKELIKIAKELLE
777	MKSVLLVDDSKVLSKVIKFALEKEGYKVVLAEDGIEALKKLEEFLPDLIICDLRMPKMNGYELLKILKNNEKLKNIPVIVISRDRTPEVEERALKLGANYYIPKPFSIKELIEVAKKLLN
778	MKSVLLVDDSETLRKIIKFALEREGYKVIEAPDGIEALEKLKEQKPDLIIVDLRMPKMDGFTLLKILKNDPELKNIPVIVLSLDRDPEVEKKCLELGADAYVPKPFSIKELMEIVKKLLN
779	MKSVLLVDDSETLRKVISFGIESRGYTVRYAPDGIAALKELEKFLPDLIIVDLSMPKMDGFTLLRILKEDEKLKDIPVVVLSADRTPEVKERALEAGANAYIPKPFSIKELMEVIDKLLN
780	MKKVLLVDDSETMRKIISFALEKEGYEVVFAKNGIEALEKLKKFLPDLIIVDLSMPPMNGFELLKILKNDPKLKNIPVIVLSANSDPEVKEKALKLGANAYIPKPFSIEELLKVAKKLLE
781	MKSILLVDDSETLRKIISFALEKEGYKVILAKDGKEALEKLKEFLPDLIIVDLNMPPMNGFELLKILKNNEELKNIPVVVLSADRDPEVEEKALKLGANKYIPKPFSIEELIKVIKELLN
782	MKSVLLVDDSETMRKIISFGLEKRGYTVTFAPDGRAALEALEKQLPDLIIVDLNMPPMNGFELLRRLAEDPELREIPVVVLSLDRSPEVEKRALEAGADAYVPKPFSIEELLEVVEELLN
783	MKKVLVVDDSETLRKIITFGLEKEGYETVLAKNGKEALEKLKKFLPDLIIVDLSMPPMDGFTLLKILKNDPKLKEIPVVVLSKNRDPEVEKKCLELGANKYIPKPFSIEELMKVVKELLN
784	MKKVLLVDDSETLRKIISFGIEKEGYEVVFAPNGKEALKKLEEFIPDLIIVDLSMPPMNGFELLKILKNDEKLKDIPVIVLSANRDPEVEQECLELGADAYVPKPFSIEELMEIAKKLLE
785	MKSVLLVDDSETLRKIIKFALEKKGYTVIEAPDGVEALKKLEKFRPDLIIVDLRMPKMDGFTLLEVLANDPELREIPVLVLSGDRDPEVEERALEAGADAYVPKPFSIEELMKIVEELLN
786	MKSVLLVDDSETMRKAISFALKSEGLTVVFAPNGKEALEKLKEFLPDLIICDLRMPPMNGFELLKILKNDEKLKNIPVVVLSLDRTPEVEKKALEAGANAYIPKPFSMKELMEVVKKLLN
787	MKTVLVVDDSETLRKIITFALEKEGWKVVLAPNGKEALEKLKKFLPDLIIVDLSMPPMNGFELLKELKNDEKLKNIPVIVLSANRDPEVEERCLKLGANKYVPKPFSIKELIKIAKELLN
788	MKSILLVDDSETLRKIISFALEKRGYKVVFAPNGIEALKKLEEFLPDLIIVDLSMPPMNGFELLKILKNDEKLKNIPVVVLSADSDPEVKEKCLKLGASKYIPKPFSIKELMEVVEKLLN
789	MKSVLLVDDSEVLSKIIKFALEKEGYSVVLAPDGKAALEKLKEFTPDLIIVDLRMPPMNGLELLRVLAEDPELREVPVVVLSADRDPEVKQECLEAGADAYVPKPFSIKELMEIVKKLLE
790	MKSVLLVDDSEVMRKIISFALEKKGYSVIYAKDGIEALKKLEEFTPDLIIVDLNMPKMNGLELLKILKENEKLKKIPVIVLSLDRSPEVEEECLKAGANKYIPKPFSIEELMKVVEELLN
791	MKSILLVDDSKTLRKIITFALESEGYSVIEAPNGIEALEKLKEFTPDLIIVDLSMPPMNGFELLKILKNDEKLKNIPVIVLSGDRSPEVEKKALEAGANKYVPKPFSISELMKIVKELLN
792	MKSVLLVDDSETLRKIISFALESRGYKVVLAPDGIEALKKLEKFTPDLIIVDLDMPKMNGLELLKRLKNDPELKEIPVVVISKDRTPEVKEKALEAGADAYVPKPFSIKELMEIVEKLLN
793	MKKILLVDDSETLRKIISFALKKEGYEVIYAPDGKSALEKLKEFLPDLIIVDLDMPPMNGLELLKILKNDEKLKKIPVVVLSRNRDPEVEKECLEAGANKYIPKPFSIKELIEVVKELLN
794	MKKILVVDDSETLRKVITFALEKEGYSVVTAPNGIEALKKLEKFLPDLIIVDLSMPKMNGFELLKKLKEDEKLKKIPVVVLSTDRDPEVEEKALELGADYYVPKPFSIQELIEIVKKLLN
795	MKSVLLVDDSETLRKIISFILESKGYSVIFARNGIEALRKLKEFLPDLIILDLRMPPMNGFEVLKILKNDEKLKKIPVIVLSADRTPEVEEKALELGANKYVPKPFSPKELMEIAEELLN
796	MKSVLVVDDSEVLRKIITFALEKEGYSVILAKNGKEALKKLEEFTPDLIIVDLRMPPMNGFELLKILKNNEKLKNIPVIVLSGDRSPEVEKECLEAGANKYIPKPFSIEELMKEAKKLLN
797	MKSVLLVDDSETLRKVISFALEKKGYSVVLAKNGKEALEKLKEFLPDLIIVDLRMPPMNGFELLKILAEDEKLKKVPVIVLSADRDPEVEQRALEAGANAYIPKPFSIQELMKVAEELLN
798	MKSILLVDDSETLRKIISFALEKEGYKVVYAKNGKEALEKLKEFLPDLIILDLSMPPMNGFEVLKILKNDEKLKNIPVIVLSKDRSEEVKEKCLKLGANAYVPKPFSIKELMEIVKKLLE
799	MKKVLLVDDSETLRKVIKFALEKRGLEVVEAKDGIEALKKLKEFLPDLIIVDLNMPKMNGFELLRILKEDEELKKIPVVVLSLDRDPEVEKKALEAGADAYIPKPFSIKELMEVVEKLLN
800	MKTILLVDDSETLRKIISFALEKEGYKVVFAPNGIEALEKLKKFKPDLIIIDLRMPKMNGFELLKILKNDEELKNIPVIVLSGDSDPEVEERALKLGANYYIPKPFSIKELMEVVKKLLN
801	MKKVLLVDDSETLRKIISFALESKGYEVIFAPNGIEALKKLKEFLPDLIIVDLSMRPMNGFELLKILKNDPELKKIPVIVLSGDSDPEVKEKCLKLGANYYVPKPFSIKELIEIVEKLLN
802	MKKVLLVDDSETLRKIISFALEKEGYKVIFAKNGIEALKKLEKEKPDLIIVDLRMPPMNGFELLKKLKEDEELKEIPVIVLSADRDPEVEKEALELGANKYVPKPFSIKELMEIVKKLLN
803	MKSVLLVDDSETLSKIITFALESEGYTVVLAPDGKEALKKLEKFLPDLIIVDLRMPPMDGFELLRILKENEKLRKIPVIVLSADRDPEVEQRALELGADYYIPKPFSIKELMEVVKKLLN
804	MKSVLVVDDSETMRKIITFALERRGYKVILAPNGIEALKKLEKQLPDLIIVDLNMPPMNGLELLKILKNDEELKKIPVIVLSLDSSPEVEKKCLEAGANKYIPKPFSIEELMKVVEELLN
805	MKTVLLVDDSETLSKIIKFALEKRGYKVILAKNGKEALEKLKEFTPDLIIVDLNMPPMNGFELLKILKNDEKLKNIPVIVLSADRSPEVEKKALELGANKYIPKPFSIEELMKVVEELLN
806	MKSILLVDDSDVLNKAISFALEKEGYTVTLAKNGIEALKKLEEFLPDLIIVDLNMRPMNGFELLKILKNNEKLKNIPVIVLSRDRTPEVEKRCLELGANKYIPKPFSIEELMEVVKKLLE
807	MKKVLLVDDSETLRKIISFALKKEGLEVIYAPDGIEALEKLKEFLPDLIIVDLSMPKMNGFELLKILKNDEELKNIPVVVLSGDSDPEVEKECLELGANKYVPKPFSIKELMEIVKELLN
808	MKSILLVDDSETMRKIISFALEKEGYTVVFAPDGIEALKKLEEFLPDLIIVDLRMPKMNGLELLKILKENEELKNIPVIVLSADRDPEVEKEALEAGANAYIPKPFSIKELMEVVKKLLE
809	MKSVLLVDDDEVLRKIISFALEKEGYKVVFAPNGKEALKKLEEFLPDLIIVDLNMPIMNGFELLKILKENEELKKIPVIVLSADRTPEVEKEALEAGANKYIPKPFSIKELIEVAKELLN
810	MKSILLVDDSETLRKIISFALKSEGYSVIYAPNGKEALEKLEKFLPDLIIVDLSMPPMNGFELLKKLKNDEKLKNIPVVVLSRNRDPEVEKKCLELGANKYVPKPFSIEELMKVVKELLN
811	MKSVLLVDDSETLSKIISFAIEKEGYKVVFAPNGVEALKKLKEFLPDLIILDLKMRPMNGFELLRILKEDEKLKKIPVVVLSGDRSPEVEKEALELGADAYIPKPFSIEELMKVIKEKLN
812	MKSVLLVDDSETLRKIITFALEKEGLTVVEAPNGIEALEKLKEFLPDLIIVDLSMPPMNGLELLKILKEDEKLRKIPVIVLSLDRDPEVEQRCLEAGADKYIPKPFSIKELMEVVKKMLN
813	MKSILLVDDSETLRKIISFGIESKGYKVIFAPNGIEALKKLEKFLPDLIIVDLSMPPMNGFELLKILKEDEKLKKIPVVVLSANRDPEVEQECLELGANKYIPKPFSIKELMKEIEKLLN
814	MKKVLLVDDSETLRKIISFALEKEGYSVIFAKNGIEALEKLKEFLPDLIIVDLSMPPMNGFELLKILKNDEELKKIPVIVISKNRDPEVEKECLELGADKYIPKPFSIKELMKVAKELLN
815	MKSVLLVDDSETLRKIIKFALESKGYKVIEAPNGKEALEKLKEFLPDLIIVDLRMRPMDGFELLKILKNDEKLKNIPVIVLSGDRDPEVEKKALEAGANAYVPKPFSIKELIEIAEKLLN
816	MKSVLLVDDSEVLSKIISFALKKEGYTVVLAKNGIEALKKLEKFLPDLIIVDLSMRPMNGFELLKILKNNEKLKNIPVIVLSRNRDEEVKEKALKLGANKYVPKPFSIKELMEIAKKLLN
817	MKSVLLVDDSETLTKIISFILESEGYKVITAPNGIEALEKLKKFKPDLIIVDLNMPPMNGLELLKILKNNEELKKIPVVVLSADRSPEVEQECLEAGANKYVPKPFSPKELLKIVKELLE
818	MKSVLLVDDSETLRKIISFALEKEGYSVTLAPDGVEALEKLKEFLPDLIIVDLSMPKMNGFELLKILKNDEKLKNIPVIVLSLNRDPEVEEKALKLGANAYVPKPFSISELMEIAKKLLN
819	MKKILLVDDSKTLRKIIKFALEKEGYKVIEAENGIEALEKLKEFLPDLIIVDLNMPKMNGLELLKILKNDEKLKNIPVIVLSRDRSEEVKEKALEAGANKYIPKPFSIKELMEVVKKLLN
820	MKTVLLVDDSEVLRKIISFALESKGYKVILAPNGKEALEKLKEFLPDLIIVDLSMPPMNGFELLKILKNDEKLKKIPVVVISGNRDPEVEQKCLELGADKYIPKPFSIQELMEVVDELLN
821	MKTVLLVDDSEVLRKIISFALESRGYKVIYAPNGKEALEKLKEFTPDLIILDLNMPIMNGYELLKILKEDPKLKEIPVVVLSADRDPEVEERCLELGADAYIPKPFSIQELMKVVDKLLN
822	MKKILLVDDSETLRKIISFALEKEGYSVILAPDGIEALEKLEKFTPDLIIVDLSMPKMNGLELLKILKNNEKLKEIPVVVISKDRDPEVEKLALELGANKYVPKPFSIKELMKIIKELLN
823	MKSVLVVDDSETLRKIITFALESKGYKTVLAPNGIEALKKLEKFTPDLIIVDLNMRPMNGFELLKKLKEDEKLKKIPVIVLSRDRSPEVEKEALEAGADAYIPKPFSIKELMEVAEKMLN
824	MKSVLLVDDSKTLSKIISFALKSRGYSVIEAPDGKEALEKLEKQLPDLIILDLNMPKMNGFELLKILKNNEELKNVPVIVLSRDRSPEVEKEALEAGANAYIPKPFSIEELMKVAEKLLN
825	MKTILLVDDSETLRKIISFALESEGYKVIFAKNGIEALEKLKEFLPDLIILDLNMPPMNGFEVLKILKEDEKLKKIPVVVLSLDRDPEVEEKCLEAGANAYVPKPFSISELMSIVKKLLN
826	MKTILLVDDSETLRKIISFALESEGYKVVYAKDGIEALKKLEKFLPDLIIVDLNMPKMNGFELLKILKEDEKLKKIPVIVLSLDRDPEVEKEALELGANKYVPKPFSIKELIEEVKKLLN
827	MKKVLLVDDSETLRKIISFALKSRGYEVIYAPNGKEALEKLKEFLPDLIILDLNMPPMNGLEVLEILKNNEELKKIPVVVISADRTPEVEKKCLELGADKYVPKPFSIKELMEIVEELLN
828	MKSVLLVDDSETLAKIIKFALESRGYSVVLAPDGISALEKLKKFLPDLIIVDLRMPKMNGFELLKILKEDEELKKIPVIVLSGDRDPEVEKKALEAGADAYVPKPFSIKELIEIAEKLLN
829	MKSVLLVDDSETLSKIISFALEKKGYTVTLAKDGKEALKKLEEFLPDLIILDLSMPPMNGFEVLKILKENEELKKIPVIVLSLNRDPEVKRRALELGADAYIPKPFSIEELMKKVEELLN
830	MKKVLLVDDSETLRKIIKFALESEGLEVVEAKNGKEALKKLEEFLPDLIIVDLSMPIMDGFELLKILKNDEKLKKIPVIVLSADRTEEVKKKALELGANKYIPKPFSISELMEVVKKLLN
831	MKSVLLVDDSETLRKIISFALESKGYTVIFAKNGKEALEKLKEFLPDLIIVDLKMPLMNGFELLKILKNDEELKKIPVIVLSADRSPEVEKKALELGANKYIPKPFSIKELMKVVEELLN
832	MKTVLLVDDSETLRKIIKFILESEGYKVIEAKNGKEALEKLKEFIPDLIIVDLSMPPMNGLELLKILKEDEKLKNIPVIVLSGNRDPEVKEECLKLGANKYVPKPFSPKELMEIAKKLLN
833	MKSVLVVDDSKTLQDVITFALESEGLTVVRAPNGKEALEKLKEFLPDLIIVDLRMPPMNGLELLKKLKNDEKLKNIPVVVISGDRDPEVEEKALEAGADAYIPKPFSISELMEVVKKLLN
834	MKKVLLVDDSETLRKIIKFALESEGLEVIEAKNGIEALEKLKKFLPDLIICDLNMPPMNGYELLKILKNDEKLKNIPVVVLSADRDPEVKERCLELGANKYIPKPFSISELMEVVKKLLN
835	MKKILLVDDSETLRKVISFAIEKRGYEVVFAKDGVEALKKLEEFLPDLIIVDLSMPKMNGYELLKILKNNEELKKIPVIVLSLDRDPEVEKRALELGADKYIPKPFSIEELMEVIEKLLN
836	MKTILLVDDSETLRKIISFALKSKGYKVVFAKDGIEALEKLKEFLPDLIILDLNMPKMNGFEILKRLKEDPKLKKIPVIVLSLDSDPEVKEKALELGANAYVEKPFSIQELIKIVDKLLN
837	MKSILLVDDSETLRKIISFALEKKGYTVVFAKDGVEALEKLEKFTPDLIIVDLNMPKMNGLELLKRLKNDEKLKEVPVVVLSRNRDPEVERKALEAGANKYVPKPFSIEELMKIVEELLN
838	MKSVLLVDDSETMRKIISFALESEGYTVVFAKNGKEALEKLEEFLPDLIISDLSMPPMNGFELLKILKNNEELKKIPVVVLSLDTSPEVKQKALELGANAYIPKPFSIKELMEVVKKLLN
839	MKSILLVDDSETLRKIISFAIESEGYKVIYAPNGIEALKKLEESLPDLIIVDLNMPPMNGFELLKILKNNEKLKNIPVVVLSRDRSPEVEKECLELGANAYVPKPFSISELMEIIKKLLN
840	MKSVLLVDDSETLRKIISFALEKEGYTVVFAPNGIEALEKLKKFLPDLIIVDLSMPPMNGFELLKILKNDEKLKEIPVVVISGNRDPEVEKECLELGADKYVPKPFSIKELMEIVKKLLN
841	MKTVLLVDDSKTLQKIISFALESEGLKVIRASNGIEALEKLKKFLPDLIIVDLRMRPMNGFELLKILKNDEKLKNIPVIVLSADRTEEVKKKALEAGANYYIPKPFSIKELMEVAKKLLN
842	MKKILLVDDSETMRKIITFALESEGYKVITAPNGKEALEKLEKFLPDLIIVDLSMPLMNGFELLKKLKEDEKLKNIPVVVVSANRDPEVEEEALKLGANKYVPKPFSIQELIKIIKELLN
843	MKSILLVDDSETLRKIISFALESRGYSVVFARNGVEALEKLKEFLPDLIILDLSMPPMNGFEVLRILKEDPELRKIPVVVLSKNRDPEVEKEALELGADKYIPKPFSIKELMEVIDELLN
844	MKSILLVDDSETLQKIISFALEKRGYKVIRARNGKEALEKLEKFLPDLIILDLRMPPMNGFEVLKILKNNPKLKNIPVIVLSGDRSPEVEKKCLELGANKYIPKPFSIEELMKVVEELLN
845	MKTILLVDDSKTLRKIITFALESRGYKVIEAPNGIDALEKLKEFLPDLIIVDLNMPPMNGLELLRILKEDPELKKIPVVVLSTDRDPEVEKEALEAGADAYVPKPFSIEELMEIVDKLLN
846	MKTILLVDDSETLRKIIKFALESKGYKVILAKNGKEALEKLKKSLPDLIIVDLNMPPMNGLELLKILKENPELKNIPVVVISGDRDPEVEKLALEAGANAYVPKPFSIKELIEIVEKLLN
847	MKSVLLVDDSETLRKIISFALEKEGYSVIYAKNGIEALKKLEEFLPDLIILDLNMPPMNGFEVLKKLKNDEKLKEIPVIVLSGDRSPETEKKCLELGANYYVPKPFSIQELMKIAKKLLE
848	MKTVLLVDDSETLRKVIKFSLEKKGYKVIEAPNGIEALEKLKEFLPDLIIVDLSMRPMNGYELLKILKNDEKLKKIPVIVLSRNRDPEVEKKCLELGADKYIPKPFSIQELMEVAEELLN
849	MKSVLLVDDSETLRKVISFALKSRGLTVVEAPNGIEALKKLEEFLPDLIIVDLNMPPMNGLELLKTLKNNEKLKKIPVIVLSLDRDEEVKERALEAGADAYIPKPFSISELMEVVEKLLN
850	MKSVLVVDDSETMRKVITFALESKGYTTVLAPNGIAALEKLKEFLPDLIILDLRMPPMNGFKLLEILKNDPELRKIPVIVLSGDRDPEVEKRALEAGANKYIPKPFSIEELIKVAEELLN
851	MKTILVVDDSETLRKVITFALESKGYKVILAENGKEALEKLKKFLPDLIIVDLSMPPMNGFELLKILKNDPELKKIPVVVLSANRDPEVEEKALELGADKYIPKPFSIKELMEVVEELLN
852	MKSILLVDDSETMRKIISFALEKEGYTVIFAPNGVEALEKLKEFLPDLIILDLSMPPMNGLEVLKILKNDEKLKEIPVIVLSADRSPEVEKKCLEAGANAYIPKPFSISELMEVVKKLLN
853	MKKILVVDDSETLNKIITFALEKEGYEVILAKNGKEALEKLKEFIPDLIIVDLNMPPMNGEELLKILKNNEKLKNIPVIVLSLDRDPEVKKRALELGANKYVPKPFSIEELMKEVKKLLN
854	MKSVLLVDDSETMRKIISFALEKKGYTVIFAPDGIEALKKLKEFLPDLIIVDLRMPKMNGLELLKILKEDEKLKEIPVIVLSGDRSEEVKERCLEAGADKYVPKPFSIEELMKIAEELLN
855	MKSILVVDDSETLRKIITFALEKEGYKTVLAPDGIEALKKLEKFLPDLIIVDLRMPKMNGYELLKILKENEKLKKIPVVVLSGDRSEEVKKRALELGANKYIPKPFSIKELIEVIKELLN
856	MKTILVVDDSETMRKIITFSLEKEGYKVILAPNGIAALEKLKKFLPDLIIVDLSMPPMNGYELLKILKNDEKLKNIPVIVLSLDRDPEVEQRCLELGADKYIPKPFSIKELIKVAKELLE
857	MKTILLVDDSETLSKVISFALEKEGYKVILAPNGKEALEKLKKFLPDLIIVDLRMPPMNGYELLKILKNDEKLKNIPVVVISGDRDPEVEERALKLGANKYIPKPFSIKELMEVVKKLLN
858	MKSILLVDDSETLRKIISFALESEGYTVVYAPNGKEALEKLEEFLPDLIIVDLRMPPMNGFELLKKLKNDEKLKKIPVVVLSGDRSPEVEKKCLELGANKYIPKPFSIKELMEVVKELLN
859	MKSILLVDDSETLRKIISFALKKEGYTVKFAKNGIEALEKLKEFLPDLIILDLSMRPMNGFEVLRILKEDEKLRKIPVIVLSLDRSPEVEKEALELGADKYVPKPFSIKELIEEVKKLLN
860	MKSVLLVDDSEVLSKIISFALESRGYTVTLAPNGIEALKKLEKFKPDLIIVDLSMPPMNGFELLKKLKEDPELKEIPVIVLSRNRDPEVEEKCLKAGADKYVPKPFSIEELMEIAEELLE
861	MKKVLLVDDSETLRKIIKFALESRGYEVIEAKNGVEALKKLEEFLPDLIIVDLRMPPMNGFELLKKLKENEELKKIPVVVISADRSPEVEKKALELGANKYIPKPFSIKELMEVVEELLN
862	MKTVLLVDDSETMRKIISFAIESRGYKVIEAPNGIEALEKLKEQLPDLIIVDLSMPPMNGFELLKRLKEDPKLKEIPVIVLSADRSPEVEEKALELGANKYIPKPFSIEELMKVIEKLLN
863	MKKILVVDDSETLRKVITFALESKGYSVVLAENGIEALKKLEEFLPDLIIVDLSMPPMNGFELLKILKNDPKLKNIPVVVLSLDRSPEVEKRALELGANKYVPKPFSIEELMKIVEELLN
864	MKSVLLVDDSETLRKIISFALESEGYKVIFAKDGKEALEKLKEFLPDLIIVDLSMPKMNGKELLKILKEDEKLKKIPVIVLSGNSDPEVEKEALELGANAYVTKPFSIEELMEIAKKLLE
865	MKSVLVVDDSETLRKVITFALEKEGYTVILAKNGIEALKKLEEFLPDLIIVDLNMPPMNGFELLKILKNDEKLKNIPVIVLSGDRSEEVKEKCLEAGANYYIPKPFSIKELMEVAKKLLN
866	MKKILLVDDSETLSKIIKFALEKEGYEVVLAKNGKEALKKLEEFLPDLIIVDLSMPPMDGFTLLKILKNNEKLKKIPVIVLSRNRDPEVEEEALKLGANKYIPKPFSIKELMEVAKKLLN
867	MKTILLVDDSETLRKIISFVLEKEGYKVIFAPNGKEALEKLKEFLPDLIIVDLRMPPMNGFELLKILKEDEKLKNIPVIVISKDRTPEVEKKCLELGANKYIPKPFSLKELMEVAKKLLE
868	MKSVLLVDDSETLRKIISFALESEGYTVTYAKDGKEALEKLKEFLPDLIILDLSMPPMNGYEVLKILKNDPELKKVPVIVLSRDRDPEVEEKALELGADAYIPKPFSIEELLKVVKELLE
869	MKSVLLVDDSETLSKIISFALEKEGLKVTLAKNGKEALEKLKEFLPDLIIVDLNMPEMDGLTLLEILKNDEKLKKIPVIVLSGDRDPEVKERCLKAGANKYIPKPFSIEELIKVVKELLE
870	MKKILLVDDSETLRKVISFALKKEGYEVIFAPNGIEALKKLEEELPDLIICDLSMPPMNGLELLKILKNNEKLKKIPVIVLSLNTDEEIKKKCLEAGANKYIPKPFSISELMEVVKELLN
871	MKSVLLVDDSETMRKVISFALEKEGLKVVTAPDGIEALKKLEKQLPDLIIIDLRMPKMNGYELLKILKEDEKLKEVPVIVLSGDRTEEVKERALELGADKYIPKPFSIEELMKVVKELLN
872	MKTVLVVDDSETLRKIITFALEKEGYKTILAKDGIEALKKLEEFLPDLIIVDLNMPKMNGFELLKILKNNEELKNIPVIVLSRDRDPEVEKKALELGANKYIPKPFSIEELIKVAKELLN
873	MKKILLVDDSETLRKIISFSLEKEGYSVVFAPNGKAALEKLKEFLPDLIIVDLDMPPMNGFELLRILKEDPELRKIPVIVLSRDRSPEVEERALELGADAYIPKPFSIEELMEVVKKLLE
874	MKSILLVDDSKTLRKVIKFALESEGYTVVEAPNGKEALEKLKKFTPDLIIVDLRMPPMNGLELLKILKNDEKLKKIPVVVLSADRSPEVEKEALEAGADAYVPKPFSIKELMEVIKKLLN
875	MKTILLVDDSETMSKIISFGLEKEGYKVIRASNGKEALEKLKEFLPDLIICDLNMPPMNGFELLKILKEDEKLKKIPVVVLSGDRDPEVKEKALKLGANKYIPKPFSIEELLKVVKELLN
876	MKKILLVDDSETLQKIISFALEKEGYKVVFAPDGKEALKKLEKFLPDLIILDLRMPKMNGFEVLKILKNNEKLKEIPVIVLSADRSPEVEEECLKLGADAYVPKPFSIKELMEIVKKLLN
877	MKSVLVVDDSKTLRKVITFALERRGYKTIEAPNGKEALEKLEEFLPDLIILDLRMPPMNGYEVLKKLKEDEKLKEIPVIVLSGDRDPEVEKKALELGANAYVPKPFSIEELMKIVEKLLN
878	MKTVLLVDDSETLRKIIKFILEKEGYKVIEAPDGIEALKKLEEFLPDLIIVDLDMPKMNGLELLKILKNNEELKKIPVIVLSGNRDPEVEEKCLEAGADAYIPKPFSPSELLKVAKKLLE
879	MKSVLLVDDSETLRKIISFALESKGYTVIYAKNGIEALEKLKKQLPDLIIVDLSMRPMNGLELLKILKNDEKLKKIPVIVLSTNSDPEVEKKCLELGANKYISKPFSISELMKVVEELLN
880	MKSILLVDDSETLRKIIKFGLEKEGYKVIEAKNGVEALEKLKEFLPDLIIVDLRMPIMNGLELLRKLAADPKLREIPVVVLSGDRDPEVEQRALEAGANAYVPKPFSIKELLEIIKKLLN
881	MKSVLLVDDSETMRKIISFALEKEGLKVIYAPNGIEALKKLEKFLPDLIILDLSMPPMNGFELLKKLKNDEKLKKIPVIVLSADSDPEVKEECLKLGANKYVEKPFSIEELMKIVKELLE
882	MKSVLLVDDSEVLSKIISFGLEKKGYSVIYAKNGIEALEKLKEQLPDLIIVDLSMPLMNGFELLKILKEDEKLRNIPVIVISGNRDPEVEKKALELGADAYVPKPFSIEELMKIAEKLLN
883	MKSILLVDDSETLAKIIKFALEKEGYTVVLAKNGKEALEKLKKQLPDLIIVDLRMRPMNGFELLKILKNDEKLKNIPVVVLSRDRTPEVEKKALELGADKYIPKPFSIEELMKVVKELLN
884	MKSILLVDDSETLRKIISFALEKKGYKVVYAPNGVEALEKLKKFKPDLIIVDLRMPKMNGYELLKTLKNDPELKKIPVIVISGDRDPEVEEKALELGANKYIPKPFSIEELMKEVEKLLN
885	MKSILLVDDSETLRKIISFGLEKEGYTVTLAPNGKEALEKLKKFLPDLIILDLRMPLMNGFEVLKILKNDEKLKNIPVIVLSRDRDPEVEQEALEAGANAYVPKPFSISELMEIAKKLLN
886	MKSVLLVDDSETLQKVISFALESKGYSVIKAPNGIEALEKLKEFKPDLIIVDLSMPLMNGFELLKILKNNEELKEIPVIVLSGNRDPEVEEKALELGADKYVPKPFSIEELMKIAEELLN
887	MKSVLLVDDSKTLRKIIKFALESEGLTVVEAPNGKEALEKLKKFLPDLIIVDLRMPPMNGFELLKILKNDEKLKKIPVIVLSGDRSPEVEKECLEAGANAYVPKPFSIEELMKIAKELLE
888	MKTILLVDDSETLRKIIKFALEKEGYKVVEARNGVEALEKLKKFRPDLIIVDLSMPPMDGFELLRILKEDEELREIPVIVLSLDRDPEVEQRALEAGADAYVPKPFSISELMKIVKEKLE
889	MKKILLVDDSETLQKIISFALEKKGYSVVRAPNGIEALEKLKKFKPDLIILDLRMPPMDGLTLLKILKNDEELKKIPVVVISKDRSPEVEKEALEAGADAYVPKPFSIKELIEIVEKLLN
890	MKSVLLVDDSETLRKIIKFGLEKEGYKVVEAPNGIEALEKLKEFLPDLIIVDLRMRPMNGLELLKILKEDEKLKEIPVIVLSGDRDPEVEEKALKAGANAYVPKPFSIKELMEIAKKLLE
891	MKTILLVDDSETLSKIISFALEKKGYKVIRAKNGKEALEKLEKFLPDLIIVDLSMPPMNGLELLKKLKEDEELKKIPVIVLSANRDPEVKEKALKLGANAYIPKPFSIQELMEVVEKLLN
892	MKSVLLVDDSETLRKIISFALKSRGYKVIFAKDGIEALKKLKEFLPDLIIVDLSMPKMNGLELLRILKEDEELRKVPVVVLSGDRDPEVEQKCLELGADKYVPKPFSIKELMEVVEELLN
893	MKSVLLVDDSEVLQKIISFALESEGYTVIRAPNGREALEKLKKFTPDLIIVDLSMPPMNGYELLKILKEDEELKKIPVIVLSANRDPEVEEKALELGADKYVPKPFSISELIEIAKELLN
894	MKKVLVVDDSETLRKIITFALKKKGYEVVLAKNGIEALKKLEEFLPDLIIVDLNMRPMNGLELLKILKNNEKLKNIPVIVLSGNRDPEVEKKCLEAGANAYIPKPFSIEELMKVVEKLLN
895	MKSVLLVDDSETLRKIISFALEKEGLKVVYAPNGIEALEKLKKFLPDLIIVDLNMPPMNGFELLKILKNDEKLKKIPVVVLSLDRDPEVKEKCLELGADAYVPKPFSIKELMEIVKKLLN
896	MKKILLVDDSETLRKIIKFALEKEGYSVVLAKNGKEALEKLKKFLPDLIILDLRMPPMNGFELLKILKEDEELKNIPVIVLSRDRTPEVKKKALELGADKYIPKPFSIEELMKVVKELLN
897	MKTILLVDDSETLRKVISFALEKEGYKVIYAKNGKEALEKLEKFLPDLIIVDLNMPPMNGYELLKKLKNDEKLKNIPVIVISKDRTPEVEERALKLGANKYIPKPFSIKELMEVVKELLN
898	MKTVLLVDDSETLNKIISFALESKGYKVVLAKDGIEALKKLEKFLPDLIIVDLSMPKMDGFELLKILKEDEELKNIPVVVLSLNRDPEVEKECLEAGANKYVPKPFSIEELMEVVEKLLN
899	MKSVLLVDDSETLNKVIKFALESKGYSVVLAPNGIEALKKLEKFLPDLIILDLSMPPMNGFELLKILKNNPELKKVPVIVLSLDETEEVKERALKAGANAYIPKPFSIQKLIEVAEKLLN
900	MKKVLVVDDSKTLRKIITFALKSKGYEVIEAPNGIEALEKLKEFLPDLIIVDLRMRPMNGFELLEILKNNPELRKIPVIVLSGDRDPEVEERALEAGADAYIPKPFSIKELMEVAEKMLN
901	MKKILLVDDSETLRKIISFVIESEGYEVVFAPNGKEALEKLEEFLPDLIILDLSMPPMNGFEVLKILKENEKLKKIPVIVLSLDRDEEVKERCLKLGANKYIPKPFSLKELMEVIKELLE
902	MKSVLLVDDSKTLRKIISFAIESEGYTVVEAPNGIEALEKLKEFLPDLIIVDLRMPPMNGFELLKILKNDEKLKEIPVVVLSRDRDPEVEEKALEAGADKYIPKPFSIKELMEEIKKLLN
903	MKSVLLVDDSETLRKIISFALESKGYTVTYAKDGKEALKKLEEFLPDLIIVDLRMPKMNGFELLKKLKNDPKLKEIPVIVLSGDRSPEVEEKALELGANAYVPKPFSISELMKIAEKMLN
904	MKSVLLVDDSETLRKIISFALESKGYTVIFAPNGKEALKKLEESLPDLIIVDLRMPIMNGFELLRILKEDEKLRDIPVIVLSGDRDPEVEKKALELGADKYVPKPFSIKELIEIAEELLN
905	MKKVLLVDDSETMRKIIEFALKKEGYKVVRARNGIEALEKLKEFLPDLIIVDLSMRPMNGFELLKILKNDEKLKEIPVIVLSADRDPEVEKKCLEAGANAYIPKPFSIKELMEVAKKLLE
906	MKKILLVDDSETLTKIISFALESKGYSVITAPNGIEALEKLKKFLPDLIIVDLSMRPMNGFELLKILKNDEKLKKIPVVVLSADRSEEVKERALKGGANAYVPKPFSISELMKIIEELLN
907	MKSVLLVDDSETLRKVISFALKKEGLEVIFAKDGIEALKKLEEFLPDLIICDLSMPKMNGFELLKKLKNDEKLKKIPVVVLSLDRSPEVEEKCLKAGADKYIPKPFSIKELMEVVKELLN
908	MKTVLLVDDSETMQKIISFGLESKGYKVIRAKDGKEALEKLEKFLPDLIIVDLSMPPMNGFELLQTLKNNEELKNIPVVVLSGDESEEVKEKALKAGANKYIPKPFSIQELLKVIEKLLN
909	MKSILLVDDSETMRKIISFALESEGYTVIYAPNGIEALEKLKKFLPDLIIVDLSMPLMNGFELLKILKNDEKLKKIPVIVLSANRDPEVEERALELGANKYIPKPFSIEELIKEVKKLLN
910	MKSVLLVDDSEVLQKVISFALEKEGYSVILAPNGKEALEKLKEFLPDLIIVDLRMPPMNGFELLRILKEDEKLRKIPVIVLSGDRDPEVKERALEAGADAYIPKPFSIEELMEVAKKLLE
911	MKSILLVDDSETLRKIISFALESKGYKVVYAKNGIEALKKLEEFLPDLIIVDLSMPPMNGYELLKILKENEKLKKIPVVVLSGNRDPEVKEKALKLGANKYIPKPFSISELLKVIEELLN
912	MKSILLVDDSKTMQKVIKFALEKEGYSVVLAPNGKEALEKLKEFLPDLIIVDLRMPLMDGFELLKVLKEDPELKKIPVVVLSTDRSPEVEEKALELGADAYVPKPFSIKELMEIVKKLLN
913	MKSVLLVDDSETLRKIISFALESRGYKVVFAPNGKEALEKLKEFLPDLIIIDLNMPPMNGFELLKILKEDEELKKIPVIVLSLDRDEEVKEKALKLGANAYIPKPFSIKELMETVEKLLN
914	MKKILLVDDSETLRKIIKFALESKGYKVVTAPNGKEALEKLKEFLPDLIIVDLSMPPMNGRELLKILKEDEKLKNIPVVVLSGNRDPEVEKEALELGANKYIPKPFSIEELMKEIEKLLN
915	MKKILLVDDSETMRKIISFALEKEGYEVVFAKDGIEALKKLEKFLPDLIIVDLNMPKMNGFELLKKLKNDEKLKKIPVIVLSLDEDEEVKKEALEAGANKYIPKPFSIKELMEVVKKLLN
916	MKKILLVDDSETLRKVIEFALKKRGYSVVRAPNGVEALEKLEEFLPDLIIVDLRMPPMNGYELLKILKEDPKLKKIPVVVLSGDRDPEVEKRCLELGADKYIPKPFSIEELMEVVEKLLN
917	MKSVLLVDDSETLQKIITFALESEGYTVVRAPNGIEALEKLKEFLPDLIIVDLSMPPMNGFELLKILKEDPELKKIPVIVISGDSSEEVKEKALELGANKYVPKPFSIKELIEIAKELLE
918	MKSVLLVDDSETLNKIISFALESEGWTVTLAPDGKAALEKLKEFKPDLIIVDLRMPPMNGFELLKKLKEDEELKNIPVIVLSGDRSEEVKEEALKLGANKYVPKPFSISELIKIAKELLN
919	MKKILVVDDSETLRKIITFALESEGYEVIYAPNGIEALEKLKEFLPDLIIVDLSMPKMNGFELLEKLKNDEELKKIPVVVLSADRSPEVEEKALKAGANAYVPKPFSIKELMEIVKKLLN
920	MKKVLVVDDSETLAKIITFGLKSRGYEVVLAPNGKAALEKLEEFLPDLIIVDLSMPPMNGFELLKVLKENEELRKIPVIVISKDRTPEVEKKALELGADAYVPKPFSILELMEIAEKLLN
921	MKTVLLVDDSETMNKIISFALESEGYKVILAKDGKEALEKLKKFLPDLIILDLSMPLMNGFELLKILKNDEKLKNIPVIVLSTDRSPEVEEEALKAGADAYIPKPFSIKELMEVAKKLLN
922	MKSVLLVDDSETLSKIITFALEKEGYTVIRARNGIEALEKLKESLPDLIILDLSMPPMNGLELLKILKNDEKLKKIPVIVLSGDRDPEVEKLALELGANKYIPKPFSISELMEVAKKLLE
923	MKTVLVVDDSETLRKIITFALESRGYKVILAPNGKEALEKLKEFLPDLILVDLNMPPMNGFELLKILKENEELKKVPVVVISLDRDPEVEKRCLEGGANAYIPKPFSIKELMEVVEKLLN
924	MKSILLVDDSETLRKIISFALEKEGYTVVEAKNGKEALEKLEKFLPDLIILDLSMPPMNGFEVLKILKNDEKLKKIPVIVVSGNRDPEVEQKCLELGADKYIPKPFSIEELMEVVKELLN
925	MKSVLLVDDSETLRKIISFGIEKEGYTVTYAPDGIAALEKLEEFLPDLIIVDLRMPKMNGFELLKILKEDEKLKKIPVIVVSADRSPEVEEKALKLGADKYIPKPFSIEELMKVIKELLE
926	MKKVLLVDDSETLRKIISFALKKEGYEVIEAPNGKEALEKLKKFLPDLIIVDLRMRPMDGFTLLKILKNDEKLKKIPVIVLSADRSPEVEKKALELGANYYVPKPFSIKELMEIAKKLLN
927	MKSILLVDDSETLRKIISFVLESKGYTVVFAKNGIEALEKLKEFLPDLIIVDLNMPPMNGFEFLKILKEDEKLKKIPVIVLSADRSPEVKKKCLEGGANKYIPKPFSLKELMEVVDKLLN
928	MKKILLVDDSETLRKIISFALKKEGYEVVFAPNGKEALEKLKKFLPDLIIVDLRMPLMNGFELLRILKEDEKLKNIPVIVLSRDRDPEVEEEALKLGADAYIPKPFSIEELMKVVKKMLN
929	MKSILLVDDSETLRKVITFALKSEGYSVILAKNGIEALKKLEEFLPDLIIVDLSMPPMNGFELLKILKNNEKLKNIPVIVLSLDSDPEVKKECLELGANKYVPKPFSIKELMEIAKKLLN
930	MKTVLLVDDSEVLRKVISFALESKGYKVVLAPNGKEALEKLKEFLPDLIIVDLRMRPMNGFELLKTLKNDEKLKKIPVVVLSADRDPEVKERALEAGADAYVPKPFSIKELMEIVEKLLN
931	MKSILLVDDSETLRKIISFALESEGYTVTYAPDGIEALEKLKESLPDLIIVDLSMPKMNGLELLKELKEDPERKKIPVVVLSGNSDPEVEKEALEAGADKYIPKPFSISELMKVVKELLN
932	MKTVLLVDDSETLRKIITFALESRGYRVVTAPDGRAALEKLKEFRPDLIIVDLDMPPMDGFELLKVLAEDPELREIPVVVLSRDRSPEVEERALEAGADKYIPKPFSIEELMKVVEELLN
933	MKSVLVVDDSETMRKIITFALESEGYSVVLAPNGIEALEKLKKFLPDLIIVDLRMPPMDGYTLLKILKENEKLKKIPVIVLSADRSPEVEKRALELGANYYIPKPFSIKELIEVAKKLLN
934	MKTILLVDDSETLRKIISFILESKGYKVIYAPNGKEALEKLEEFLPDLIICDLRMPPMNGFELLEKLKNDEKLKKIPVVVLSGDRDPEVKKRCLELGANAYVPKPFSPQELLEIVEKLLN
935	MKSVLLVDDSETLRKIISFALESEGYTVTYAPNGIEALKKLKEFLPDLIIVDLRMPPMNGFELLKILKEDPKLKKIPVIVLSGDRSEEVKKKALELGANAYIPKPFSIKELLEVAKKLLN
936	MKTILLVDDSETLSKIIKFALEKKGYKVVFAPNGKEALEKLEKFLPDLIIVDLNMPPMNGFELLKILKNNPELKKIPVVVLSADRTPEVEKKALELGANAYIPKPFSIEELIKVVEELLN
937	MKSILLVDDSETLSKIISFALESRGYSVIRAKNGIEALKKLEEFLPDLIIVDLRMPPMNGFELLKILKNNPELKKIPVVVLSGDRSPEVKQKALELGANAYIPKPFSIEELMKVIEKLLN
938	MKSVLLVDDSETMSKIITFAIESRGYTVTLAPDGVEALKKLKEFLPDLIIVDLSMPKMNGLELLKELKNNEELKKIPVVVLSADRTPEVEKRCLEAGANKYIPKPFSISELMEVIEELLN
939	MKTVLLVDDSETLSKIIKFALEREGYKVILAPNGKEALEKLEEFLPDLIIVDLRMPPMDGFTLLKILKNNEKLKNIPVVVLSGDRSEEVKERALKLGAKKYIPKPFSIEELIKVVKELLN
940	MKSVLLVDDSETLRKIIKFALESEGYTVVEAPDGKAALEKLKKFLPDLIICDLRMPLMNGFEFLKILKNDEKLKKIPVVVISGDRSPEVEEKALKAGANAYIPKPFSIKELMEVVKKLLN
941	MKKVLLVDDSETLSKIITFALEKEGYKVILAKDGIEALKKLEKEKPDLIIVDLNMPKMNGYELLKILKNDEELKKIPVVVLSADSSPEVEKKALELGADAYVPKPFSISELMEIVKKLLN
942	MKSILLVDDSETLRKIITFALESKGYSVILAKNGKEALKKLEKFLPDLIIVDLSMPIMNGFELLKILKENEELKKIPVIVLSADRDPEVEKKALELGANAYVPKPFSIQELIEIIDKLLN
943	MKSVLLVDDSETLAKIISFALKSKGYTVTLAKNGVEALEKLEKFLPDLIIVDLDMPPMNGFELLKKLKNDEKLRKIPVIVLSRNRDPEVKEKCLKLGADAYVPKPFSIQELIKIAEKLLN
944	MKSILVVDDSETLRKIITFALEKEGYTVILAPNGKEALEKLEKFLPDLIIVDLSMPPMNGLELLKILKENEELKKIPVIVLSLDRDPEVEKKALEAGANAYIPKPFSIEELMKKVRELLE
945	MKTVLLVDDSETLRKIIKFALESEGWKVIEAPNGKEALEKLKKFTPDLIIVDLSMPPMNGFEFLKILKNNEELKNIPVIVLSGDRSEEVKEKCLKLGANKYIPKPFSIKELIEVAKELLN
946	MKSVLLVDDSETLRKIISFALESKGYKVYFAKNGIEALKKLEEFLPDLIIVDLRMRPMNGFELLKILKENEKLKNIPVIVLSLDRDPEVKKEALELGADKYIPKPFSIQELLKVVEELLN
947	MKKILLVDDSETLRKIIKFALESEGYEVVEAPNGKEALEKLKEFLPDLIILDLSMPPMNGLELLRKLREDEKLREIPVVVLSGDRSPEVEEEALEAGADKYIPKPFSIKELMEVVKELLN
948	MKSILLVDDSETLSKIISFALEKEGYSVTYAPNGKEALEKLKEFKPDLIIVDLSMPPMNGFELLKILKEDEELKNIPVVVLSGDRDPEVEKKALELGANKYVPKPFSIKELMEIVKKLLE
949	MKSVLLVDDSETLRKVISFALEKRGYTVTYAKDGIEALEKLKEFTPDLIIVDLSMPKMNGFELLKILKNDEKLKNIPVIVLSRDRSPEVEEECLKLGANAYVPKPFSIEELMEIVEKLLN
950	MKSVLLVDDSETMRKIISFAIESEGYTVTYAPDGIEALEKLKEFIPDLIIVDLSMPKMNGFELLKILKNDEELKKIPVIVVSGDSSPEVEKEALEAGADAYIPKPFSIRELMEVIKKMLN
951	MKTVLLVDDSETLNKIISFALEKEGYKVILAPNGKEALEKLKEFLPDLIILDLRMPPMNGFEVLKILKNDEKLKKIPVVVLSRDRSPEVEEKALKLGANAYVPKPFSIEELMKIVKKLLN
952	MKSILLVDDSETLSKIISFALESKGYKVVLAKNGKEALEKLEKFLPDLIIVDLRMPPMNGFELLKILKNNEKLRNIPVVVISLDRSPEVEEEALKAGADAYVPKPFSIKELIKIIEKLLN
953	MKSILLVDDSETLSKIISFGLESKGYSVVRAPNGVEALEKLKKFLPDLIIVDLNMPPMNGFELLKILKNDEKLKKIPVIVLSADRSPEVEEKALEAGADAYIPKPFSIKELMEVVEKLLT
954	MKSVLLVDDSKTLSKIISFALEKEGYTVTLAPNGKEALEKLKEFLPDLIIVDLNMPPMNGFELLKELKNDPELKKIPVIVLSGDRDPEVEKKALELGADAYIPKPFSISELMEVAKKLLN
955	MKKILLVDDSETLSKIISFALEKEGYSVVRAKNGVEALRKLEEFLPDLIIVDLRMPPMDGFELLRRLREDPELRKVPVVVLSRDRSPEVERRALELGADAYVPKPFSIKELIEIIKKLLE
956	MKTVLLVDDSETMRKIISFALESRGYKVIWAPNGKEALEKLKKFLPDLIIVDLYMPPMNGFELLKILKEDEELKKIPVVVLSADRTPEVEKRALELGADYYIPKPFSIEELMKVVEKLLN
957	MKSVLLVDDSKTLRKIISFALESEGLSVIEAPDGKEALEKLKEFLPDLIIVDLSMPPMNGLELLKILKNDEKLKKIPVIVLSADRDPEVEKKCLELGADAYVPKPFSIQELMEIVKELLE
958	MKSVLLVDDSETMRKIISFALESEGYTVIYAPNGKEALEKLKEFLPDLIIVDLRMPPMNGYELLKILKNNPELKKIPVIVLSLDRTPEVEKRALELGANKYVPKPFSIKELIEIAKKLLN
959	MKSILLVDDSETLQKIISFGLEKEGYTVVLAKDGKEALEKLKEFLPDLIIVDLSMPKMNGLELLKILKNDEKLKNIPVIVISADRSPEVEKECLEAGADYYVPKPFSIKELLEIVKKLLN
960	MKSILLVDDSETLRKIISFALKSKGYTVTFAKNGIEALKKLEKFLPDLIIVDLNMRPMNGLELLKILKNNEKLKEIPVIVISTDRDPEVEKKCLEAGANYYIPKPFSIQELIKVIEKLLN
961	MKTILLVDDSETMRKIISFALEKEGYKVIEAKNGKEALEKLKKFLPDLIIVDLRMPPMNGFELLKILKEDEKLKNIPVIVISGDRSPEVEKECLELGANKYVPKPFSIEELMKIVKEMLN
962	MKKVLLVDDSEVLRKIISFALEKEGYSVVYAKDGIEALEKLKEFLPDLIIVDLSMPKMNGFELLKILKEDEKLKEIPVVVISADRDPEVEKKALELGANAYVPKPFSIKELMEIVKKLLE
963	MKSILLVDDSKVLRKIIKFALEKEGYSVIEAPNGIEALKKLEKFLPDLIIVDLNMPPMNGFELLKKLKENEELKKIPVVVLSKDRDPEVKERCLELGANKYVPKPFSISELMKIVKELLE
964	MKSVLLVDDSETLAKVITFALESEGYTVTLAKNGKEALEKLKEFLPDLIIVDLRMPPMNGFELLKELKNDEKLKKIPVIVLSGDRDPEVEKRCLEAGADAYIPKPFSISELMEVVKKMLN
965	MKSVLLVDDSETLRKIISFALEKRGYKVIYAKNGIEALEKLKKSLPDLIIVDLDMPPMNGFELLKILKEDEELKNIPVIVLSANRDPEVEEEALKLGANKYVPKPFSIKELMKIAEELLN
966	MKKVLLVDDSETLNKIIKFGLESKGYSVILAKNGIEALEKLKKELPDLIILDLSMPPMDGFTVLKILKNDEKLKNIPVVVISKNRDPEVEKKALEAGANAYIPKPFSIEELMKVVEKLLN
967	MKKVLLVDDSETMRKIISFALESEGYKVVLAKNGIEALEKLKEFLPDLIIVDLSMRPMNGFELLKILKEDPELKKIPVVVLSLDRDPEVKKEALELGANAYIPKPFSIQKLMEVVKKLLE
968	MKSVLLVDDSETLRKIISFALESKGYKVVYAPNGKEALEKLEKFLPDLIIVDLRMPPMDGFEFLKILKENEELKKIPVIVLSADRSPEVKEKALELGANKYIPKPFSIEELMKVAEKLLN
969	MKTVLLVDDSETMRKIISFALESEGYKVIYAPNGIEALEKLKEFLPDLIIVDLNMPPMNGLELLKKLKEDEKLKKIPVVVLSGDRDPEVEKEALEAGANAYVPKPFSIKELMEIVKKLLE
970	MKSILLVDDSETLSKVISFAIEKEGYSVIRAKNGIEALEKLKEQLPDLIIVDLNMPKMNGFELLKILKNDEKLKNIPVVVLSGDRDPEVKEKCLELGANAYVPKPFSIKELMEIIKKLLN
971	MKSVLLVDDSETLRKIISFALESEGYSVTFAPNGKEALEKLEKFTPDLIIVDLRMPPMDGFTLLKILKNDEKLKKVPVVVISGDRDPEVREKALKLGADAYIPKPFSIKELMEVIKKLLN
972	MKSILLVDDSETLRKIISFALEKEGYKVIYAPNGIEALKKLEEFLPDLIILDLLMPPMNGFEVLKILKNNEEWKNIPVIVLSKDRDPEVKKKALEAGANAYVPKPFSIKELIEIVKKMLN
973	MKSILLVDDSEVMNKVIKFALEKKGYTVTLAPNGIEALEKLKESLPDLIILDLRMPKMNGFELLKILKNDEELKKIPVIVLSKDRTPEVEKRALELGANKYVPKPFSIQELMKIVEELLN
974	MKSVLLVDDSETLRKIISFGIEKRGYTVVRAKNGKEALEKLKEFLPDLIIVDLRMPPMDGLELLKRLKEDEKLKEIPVVVISRDRDPEVEKLCLEAGANAYIPKPFSISELMEVIEKLLN
975	MKSVLVVDDSETLRKIITFALEKEGYTTVLAKNGKEALEKLKEFLPDLIIVDLSMPIMNGFELLKILKEDPKLKEIPVVVLSADRSPEVEKEALELGADKYVPKPFSIKELMEIVKELLE
976	MKSVLLVDDSETLRKIIKFAIESEGYTVIEAKDGKEALEKLKEFLPDLIILDLSMPPMNGFEVLRILKEDPELKKIPVIVLSADRTPEVEKKALELGADKYVPKPFSIKELMKIIKELLN
977	MKSVLLVDDSETLRKIISFALESEGYKVVLAPNGKAALEKLEKFLPDLIIVDLRMPPMDGFELLKILKNNEKLKKIPVIVLSGDRSEEVKKRCLELGANAYVPKPFSIKELIEIAKKLLN
978	MKSVLLVDDSETMSKIISFALESKGYKVTLAKDGVEALEKLKEFLPDLIILDLSMPKMNGFELLKILKNDEELKKIPVIVLSTDRSPEVEKECLELGANYYIPKPFSIKELIEVAEKLLN
979	MKSILLVDDSETMRKIISFALKKKGYSVIFAPDGKTALEKLKEQLPDLIIVDLRMPPMNGFELLKILKNDEELKKIPVVVLSTDRDPEVEEKALELGADKYVPKPFSISELMEIVEELLN
980	MKSILLVDDSETLRKIISFALESKGYTVTFAPDGIEALEKLKEFLPDLIILDLRMPKMNGFEVLKILKENEKLKNIPVVVLSGDRTPEVKKRALELGADKYIPKPFSISELMEVVDKLLN
981	MKSVLLVDDSETLRKIISFALEKEGLKVIFAPNGIEALKKLEEFLPDLIICDLNMPPMNGFELLKKLKEDEKLKNIPVVVLSGDRDEEVKEKALELGANKYIPKPFSIKELMEVVKELLN
982	MKSVLVVDDSETLRKVITFALESRGYTVVLAKNGVEALKKLKEFLPDLIIVDLRMRPMNGFELLKILKEDPELKKIPVVVISANRDPEVKEKALKAGADKYVPKPFSIEELMKIVEELLN
983	MKSVLVVDDSETLNKIITFALEKEGYTVTLAPNGIAALEKLKKSLPDLIICDLEMPPMNGLELLKKLKEDEKLKKIPVIVLSKNRDPEVKEKALELGANKYIPKPFSIEELMKVVKKLLN
984	MKSVLLVDDSEVMRKIISFAIESRGYSVIYAPNGKEALEKLKKFLPDLIICDLNMPPMNGFELLKILKNNEKLKNIPVVVLSLDRDPEVEKKCLELGANKYVPKPFSISELMEIIEELLN
985	MKSILLVDDSEVLRKIITFALEREGYTVVLAKDGKEALEKLEKFLPDLIIVDLRMPPMNGFELLKKLKEDEKLKEIPVIVLSADRSPEVEEKALEAGADYYVPKPFSISELMKVVKKLLE
986	MKKILLVDDSETLSKIIKFALEKEGYKVILAPNGKEALEKLKEFTPDLIIVDLSMPPMNGFEFLKILKNDEKLKKIPVIVLSADRSEEVKERALELGADKYIPKPFSIKELIEVIKKLLN
987	MKTVLLVDDSETLQKVISFALESEGYKVIRAPNGVEALEKLKEFLPDLIIVDLSMPPMNGFELLKILKNDEKLKKIPVIVISGNSDPEVEKKALELGANKYIPKPFSIKELMEVVKKLLN
988	MKSVLLVDDSETLQKIISFALEKEGYKVIRAPNGKEALEKLKEFKPDLIIVDLDMPPMNGFELLKILKEDEELREIPVIVLSLDRDPEVEKRALELGADAYIPKPFSIKELIEVAKKLLE
989	MKSILLVDDSETMRKIITFALESEGYTVTTAPDGVEALKKLEKFTPDLIILDLSMPKMNGLEVLKKLKNDEKLKNIPVLVLSADTTPEVEQKCLEAGANKYIPKPFSISELMKVVKELLN
990	MKSVLVVDDSETLSKIITFALESEGYSVVLAPNGKEALEKLEKFTPDLIILDLSMRPMNGFEILKILKNNEKLKNVPVIVLSADRDPEVEKKALELGANAYIPKPFSISELMEVVKKMLE
991	MKSVLLVDDSETLRKVISFALEKEGYTVIYAKDGIEALKKLEKEKPDLIIVDLSMPKMNGFELLKKLKEDEELKEIPVVVLSANRDPEVEEKALEAGANKYIPKPFSIKELIEVVKKLLN
992	MKSVLVVDDSEVLRKVITFALEKEGYTVVLAPNGIEALEKLKEFLPDLIIVDLEMPPMNGFELLKILKNDEKLKKIPVVVISGNRDPEVEKKCLEAGADKYIPKPFSIKELMEVVKELLN
993	MKSILLVDDSETLNKIISFALKKKGYTVTLAKNGIEALKKLEKFLPDLIIVDLNMPPMNGLELLKKLKEDEKLKKIPVIVLSLDRSPEVEQKALEAGADAYIPKPFSIEELMKVVEKLLN
994	MKKVLVVDDSETLRKIITFALEKKGYEVILAPNGIEALEKLKKELPDLIIVDLSMPPMNGFELLRILKNNEELKKIPVIVLSADSSPEVEKKALELGANAYVPKPFSISELMKIVEKLLN
995	KKSVLLVDDSETLRKVISFALESEGYTVIFAPNGVEALEKLKEFLPDLIILDLSMPLMNGFELLKILKNDEELKKIPVIVLSADRDPEVEKRALELGADKYIPKPFSIKELLEVVKKLLN
996	MKSILLVDDSETLSKVISFALKSKGYKVILAPDGIEALEKLKKFLPDLIIVDLNMPKMNGFELLKKLKEDEELKKIPVIVLSRNRDPEVKERALELGANKYVPKPFSISELMKIVEELLN
997	MKSILLVDDSETLRKIISFGLESEGYTVVYAPDGIEALEKLKEFTPDLIIVDLSMPKMNGLELLKILKNDEKLKKIPVLVLSKDRDPEVKQKCLEAGANAYVPKPFSIKELMEIVKKLLN
998	MKTVLLVDDSETLNKIISFALESEGYTVILAPNGIEALEKLKKFLPDLIILDLNMRPMNGYEVLKILKNDEKLKKIPVIVLSADRTEEVKEKALKLGANAYVPKPFSIKELMEIVKKLLN
999	MKSVLVVDDSETLRKIITFALEKEGYKVILAKNGKEALEKLKKSLPDLIILDLSMRPMNGLEVLKILKNDEKLKNIPVIVISGNRDPEVKEKALKLGANYYIPKPFSIKELMKVAKKLLN
1000	MKKILLVDDSETLNKVIEFALKSKGYEVVRAKDGIEALKKLEEFLPDLIIVDLRMPKMNGFELLKKLKNDEKLKKIPVVVISGDRSPEVEKKALEAGADAYIPKPFSIKELIEVVEKLLN
1001	MKSVLLVDDSETLRKIISFALEKEGYKVTFAKNGKEALEKLKKELPDLIIVDLSMPPMNGFELLKILKNDEKLKKIPVIVLSGDRTPEVEKEALEAGADAYVPKPFSIKELMKIVKKLLE
1002	MKSVLLVDDSETLRKIISFALESKGYTVVYAPNGKEALEKLKEFLPDLIIVDLNMPPMNGLELLKELKNDEERKKIPVVVLSLDRSPEVEKECLEAGADAYVPKPFSIQELMSIVEKLLN
1003	MKSILLVDDSETLRKIISFALESEGYSVVYAPDGVEALEKLKKFLPDLIIVDLNMPKMNGLELLKILKEDEKLKNIPVVVLSRDRDPEVEKRCLELGANKYIPKPFSIEELMKVVKELLN
1004	MKSVLLVDDSETLRKIISFALESEGYSVIYASDGIEALKKLEEFLPDLIILDLSMPKMNGLELLKKLKNNEKLKNIPVIVLSLDRSPEVEEKCLELGANKYIPKPFSIKELMEVVKKLLN
1005	MKTILLVDDSETLRKVISFALEKEGYKVVFAPNGKAALEKLKKFLPDLIIVDLSMPPMNGLELLKILKEDPELKKIPVVVLSADRSPEVEKKALEAGADAYVPKPFSIKELMEIVKKMLN
1006	MKSVLLVDDSETLSKIIKFALESKGYKVVLARNGKEALKKLEEFLPDLIIVDLSMRPMDGFELLKILKENEKLKEIPVVVLSLDSDPEVKERALELGANKYIPKPFSIEELMEVVEELLN
1007	MKSVLLVDDSETLSKVIKFALEKEGYKVILAKNGIEALKKLKEFLPDLIIVDLSMPLMNGYELLKILKNDEKLKKIPVIVLSRDRTEEVKKKALELGANYYIPKPFSIKELIKVAKKLLN
1008	MKSILLVDDSETLSKIISFALEKEGYKVIFAPNGIEALKKLEKFTPDLIICDLLMPPMNGLELLKILKENEKLKKIPVVVLSLNRDPEVEEECLKAGANKYVPKPFSIKELIEIIKELLN
1009	MKSILLVDDSETLSKIVSFALESKGYSVKLAKNGKEALKLLEEFLPDLIICDLRMPPMNGFELLKKLKNDPKLKKIPVVVLSGDRDPEVKKKALELGANYYIPKPFSIEELMEVIEKLLN
1010	MKTILLVDDSKTLRKIIKFALESEGYKVIEAPDGIEALKKLEEELPDLIIVDLRMPKMNGFELLRKLKEDEKLREIPVVVLSADRDPEVEERALEAGADAYVPKPFSIKELIEIVKKLLE
1011	MKTVLLVDDSETLRKIISFALEKEGYKVIYAKNGKEALEKLKEFLPDLIILDLSMPPMNGFEVLKILKENEKLKKIPVIVLSGDSDPEVEEKALKLGANAYIPKPFSIEELMEVVKKLLN
1012	MKSVLLVDDSETLAKIISFALESEGYKVVLAPDGVEALEKLKEFLPDLIILDLRMPKMNGLEVLKILKNDPKLRNIPVLVLSGDRDPEVEQLCLEAGANKYVPKPFSIEELMKIVKELLN
1013	MKSVLVVDDSETLNKVITFALEKEGLTVTLAPNGVDALEKLKEFTPDLIICDLNMPPMNGFELLKTLKNDEKLKKIPVVVLSADRDPEVKEKCLEAGANAYIPKPFSIKELMKVVKELLN
1014	MKSILLVDDSETLRKIISFALESKGYKVVFAKNGIEALKKLEEFLPDLIIVDLSMPPMNGFELLKRLKEDPKLKKIPVIVISLDRDPEVEEKALKLGANAYVPKPFSISELMEIAEKLLN
1015	MKSILLVDDSETLNKIIKFALESEGYKVVLAKNGIEALKKLEKFLPDLIIVDLNMPPMDGFELLKILKNDEKLKKIPVIVLSGNRDPEVEKKALELGADAYIPKPFSIKELIEVVKKLLN
1016	MKTVLVVDDSETLNKVITFALEKKGYKVVLAPDGVAALEKLKEFLPDLIILDLSMPKMNGYELLRELKNDPERRKIPVVVLSLDSSEEVKERALELGADYYIPKPFSIKELIEVVEKLLN
1017	MKSILLVDDSETLRKVIKFAIEKEGYKVVEAPNGVEALEKLKEFLPDLIIVDLRMPPMDGFTLLKILKNDEKLKEIPVIVLSLDRDPEVEEKCLELGANAYVPKPFSISELMKIIKKLLE
1018	MKSVLLVDDSKTLQKVISFALESEGYKVVLAPNGKEALEKLKEFTPDLIIVDLNMRPMNGFELLKILKNDEKLKNIPVIVLSADRDPEVEEKCLKNGANYYIPKPFSIKELIKVVKKLLN
1019	MKTVLLVDDSETLSKIISFALKKEGYKVILASNGKEALKKLEEFLPDLIIVDLSMPLMNGYELLKILKENEELKKIPVVVISKNRDPEVEEECLKLGANYYVPKPFSIKELMEIVKKLLN
1020	MKSVLLVDDSKTLRKIIKFAIESEGYKVIEAPDGIEALKKLEKELPDLIIVDLRMPKMDGLTLLKILKENEKLKNIPVIVISRNRDPEVEEECLKAGANAYVPKPFSISELMEIIKKMLN
1021	MKKVLLVDDSETLRKIISFAIESRGYSVVLAKNGKEALEKLKEFLPDLIICDLSMPPMNGLELLKILKNDEKLKNIPVIVLSLDRTPEVEEKCLELGANKYIPKPFSIEELMKVIEKLLN
1022	MKKVLLVDDSETLRKIISFVLESEGYEVIYAPNGIEALEKLKEFLPDLIICDLSMRPMNGFELLKILKNDEKLKNIPVIVLSKDRDPEVKQRCLELGANAYIPKPFSPEELMKVAKKMLN
1023	MKKVLLVDDSETLSKVIKFALEKKGYEVVLAPNGIAALEKLKEFLPDLIIVDLSMRPMNGLELLKVLKEDEELRKIPVIVLSGNRDPEVEQEALEAGADAYVPKPFSIKELMEIAEKLLN
1024	MKSILLVDDSETLSKIISFALEKRGYSVVLAKNGIEALEKLKKFLPDLIIVDLSMPPMNGLELLKILKNDEKLKNIPVVVISANRDPEVEKEALEAGANAYVPKPFSIEELMKIVDELLN
1025	MKKVLVVDDSETLRKIITFALEKEGYEVILAPNGVEALKKLEKFLPDLIILDLRMPPMNGFEVLKILKNNEKLKEIPVIVLSADRDPEVEQKALELGANKYIPKPFSIEELIEVAKKLLN
1026	MKSVLLVDDSETLAKVIKFALEKEGYKVVLAPNGKEALEKLEKFLPDLIILDLRMPLMNGLEVLKILKNDEKLKNIPVIVLSGDRSPEVEQKALEAGANKYIPKPFSIEELIKVVKELLN
1027	MKSILLVDDSETLAKIITFGLESEGYKVVLAKNGIEALKKLEEFLPDLIIVDLSMPPMNGLELLEKLKNDEELREIPVIVLSANRDPEVKEKCLKAGANAYIPKPFSIEELMKVVKKLLE
1028	MKKVLLVDDDEVLAKVISFALESRGYSVVLAPNGIAALKKLEEFLPDLIIVDLNMPPMDGFTLLKILKNNEKLKKIPVVVLSRDRDPEVEKRCLELGANAYVPKPFSISELMEIVEKLLN
1029	MKSVLLVDDSKTLNKIISFALEKEGYTVTLAPDGKEALEKLKKFLPDLIIVDLRMRPMNGFELLEILKNDEKLKEIPVLVLSADRTEEVKERCLKLGADKYVPKPFSIEELMEIVKELLE
1030	MKSILLVDDSETMRKVISFGLEKEGYSVIFAPNGIEALKKLEEFLPDLIIVDLRMPPMNGYELLKKLKEDEKLKNIPVIVLSADRSEEVKERALELGANKYIPKPFSIKELMKVVKELLN
1031	MKRILVVDDSEVLNKIITFALESKGYSVVLAKNGKEALEKLKEFLPDLIIVDLDMPPMNGFELLKILKNDEKLKNIPVIVLSKDSDPEVEEKALKLGADYYIPKPFSIEELIKVVEELLN
1032	MKSVLLVDDSETLSKIISFALESEGYTVTLAKNGKEALEKLKEFLPDLIIVDLSMPPMNGYELLKILKNDPKLKKIPVIVLSGNRDPEVEEEALKLGANKYIPKPFSIEELMKVAKELLN
1033	MKKILLVDDSETMRKVISFGIEKRGYSVVFAKNGKEALEKLKEFLPDLIIVDLSMPPMNGLELLKILKNDEELKKIPVIVLSGDRTPEVEEKALKAGANAYIPKPFSIEELMEVIEKLLN
1034	MKTILLVDDSETLRKIISFALEKEGYKVITAPNGIEALKKLEEFLPDLIILDLNMPPMNGYEVLKILKNDEKLKKIPVIVISGDRSPEVEEKALKLGANAYVPKPFSIEELMEIVKKMLN
1035	MKSVLLVDDSETLSKIISFGLEKEGYTVTRAPDGIAALEKLKESLPDLIIVDLRMRPMDGLELLRRLREDEELRKVPVVVLSLDRSPEVERRCLEAGADAYVPKPFSIQELLEVVKKLLE
1036	MKTVLLVDDSETLSKIIKFALEKEGYKVILAKNGKEALEKLKKFLPDLIIVDLSMRPMNGFELLKVLKEDEKLKNIPVIVLSGDRSPEVEKKCLELGANAYIPKPFSISELIEVAKKLLN
1037	MKKVLLVDDSETLRKIIKFALESEGYSVVEAKNGKEALEKLKKFLPDLIILDLRMRPMDGLTVLEILKNDPKLRDIPVIVLSGDRDPEVEERCLAAGADAYVPKPFSISELMKIAKKMLN
1038	MKTILLVDDSKTLNKIIKFALESEGYKVILAENGIEALKKLEEFLPDLIIVDLRMPKMNGFELLKILKNDEKLKKIPVIVLSGDRSPEVEKKALELGANAYIPKPFSIRELIEVIKKLLE
1039	MKSILLVDDSETLNKVISFALESKGYKVILAPDGVEALKKLEEFLPDLIIVDLRMPKMNGYELLRILKNDEERREIPVIVLSRDRDPEVEERALKLGADKYVPKPFSIEELMKIVEELLE
1040	MKSILLVDDSKTLQKIISFAIEKEGYTVTFAPNGKEALEKLKKFKPDLIIVDLNMPPMNGFELLKILKEDEELKKIPVIVLSGDRDPEVKERCLELGANKYVPKPFSIKELMEIIKKLLN
1041	MKTVLLVDDSETLRKIISFALESEGYSVIYAPDGKAALEKLEKQLPDLIIVDLRMRPMDGFTLLERLKNDPELRKIPVLVLSLDRDPEVEERALELGADAYVPKPFSIQELMSIVKKLLN
1042	MKKVLLVDDSETLSKIISFALKSEGYEVVFAKNGKEALKKLEEFLPDLIIVDLSMPPMNGLELLKILKEDEELKKIPVIVLSKNSDPEVKKLCLEAGANKYIDKPFSIKELMEVVKKLLE
1043	MKSILLVDDSETLRKIISFALEKEGYKVVYAKNGIEALKKLEKFLPDLIIVDLSMRPMNGFELLEKLKNDEKLKKIPVVVLSANRDEEVKERCLKAGANAYIPKPFSIEELIKVIKKLLN
1044	MKSVLLVDDSETLSKIISFALEKRGYTVTLAKNGKEALEKLKKFTPDLIIVDLSMPPMNGFELLKILKNDEKLKKIPVIVLSANRDPEVEKKALELGANYYVPKPFSIKELMEVVEKLLN
1045	MKSVLLVDDSETLRKVIKFALESEGWSVIEAPDGKAALEKLKESLPDLIILDLNMPPMNGFEVLKILKENEELKKIPVIVISADRDEEVKEKALKLGANKYIPKPFSISELIEVAKELLN
1046	MKSVLLVDDSETLRKIISFAIESKGYSVVFAPDGKEALEKLKEFKPDLIIVDLRMPKMNGLELLKILKNNPELKNIPVVVVSADRDPEVEKKCLEAGANAYIPKPFSIKELMEVIDKLLN
1047	MKSVLLVDDSETLRKIISFALEKEGYTVIYAKDGIEALEKLKKELPDLIIVDLSMPKMNGFEFLKILKNDEKLKNIPVVVLSKNRDPEVEKEALELGANKYVPKPFSIKELMEIVKELLN
1048	MKKVLLVDDSETLRKIISFALKSEGYEVVFAKDGIEALEKLKEFLPDLIIVDLSMPKMNGFELLKILKENEELKNIPVIVLSGNRDPEVKKKALELGANAYIPKPFSIEELIKEVKKLLE
1049	MKKVLLVDDSETLRKIISFALEKEGYKVVLAPNGKEALEKLKEFLPDLIIVDLNMPPMNGYELLKILKNNEELKKIPVIVLSLDRDPEVEKKALELGANKYIPKPFSIKELIKVAKELLE
1050	MKSILLVDDSETLRKVISFALESRGYKVIYAPDGIEALEKLKKELPDLIILDLSMPKMNGFEVLKILKNDEKLKKIPVVVLSGNSDPEVEEKCLEAGADKYVVKPFSIQELMEIVEKLLN
1051	MKSVLLVDDSETLGKIISFALESEGYTVIFAKDGKEALEKLKESLPDLIIVDLRMPLMNGYELLKKLKNDEELKKIPVVVLSADRDPEVEKKALELGANKYIPKPFSIKELIEVIKKLLN
1052	MKKILLVDDSETLRKIISFGLKKEGYEVVFAKDGIEALEKLKEFLPDLIIVDLNMPKMNGFELLKILKNNEELKKIPVVVLSADRSPEVEKKALELGADKYVPKPFSIKELMEIVKELLN
1053	MKTILLVDDSETLSKVIKFAIEKEGYKVILAPDGIEALEKLKEQLPDLIIVDLSMPKMNGLELLKILKEDEELKKIPVVVLSGNSDPEVEQEALEAGANAYIPKPFSIKELMEVIKKLLN
1054	MKSVLLVDDSEVMRKIISFALEKEGYTVVLAPNGIEALKKLKEFLPDLIIVDLRMPPMNGYELLKILKNDEKLKNIPVIVLSGDRDPEVEEKALELGANAYIPKPFSIKELMEVAKKLLN
1055	MKTILLVDDSKTLNKIITFALKSRGYKVILADDGIEALEKLKEFLPDLIIVDLRMPKMNGFELLKKLKNDEKLKKIPVIVLSADRSPEVEKKALELGADKYVPKPFSIEELMKIVDELLN
1056	MKSVLLVDDSETLSKIIKFALESKGYKVVLASNGKEALEKLKKFLPDLIIVDLSMPPMNGLEFLKILKNNPELKKIPVVVISKDRSPEVEKKCLEAGADKYIPKPFSIEELMKVIEKLLN
1057	MKSVLLVDDSETLRKIISFAIEKEGYTVRFAPDGKAALEKLKEFLPDLIIVDLRMPKMNGFELLRILKNDEKLRDIPVIVLSGDRDPEVEQEALELGADAYVPKPFSIKELMEIIKKKLN
1058	MKSVLLVDDSETLQKIISFALEKEGYTVVRAKNGVEALKKLEKFLPDLIIVDLSMPPMNGLELLKILKNNEKLKKIPVIVLSGDRSPEVEQKCLEAGANAYVPKPFSIKELIEIAKKLLN
1059	MKKVLVVDDSETMRKIITFALEKEGYKVVLARNGKEALEKLKEFLPDLIIVDLSMPPMNGLELLKILKEDEKLKNIPVIVLSADRDPEVEKECLEAGANKYIPKPFSIEELLKVAKELLN
1060	MKKVLLVDDSETLRKIISFALKKEGYEVVFAKNGVEALEKLKKFLPDLIILDLNMPPMNGFEVLEILKNDEELKKIPVIVLSGDRSPEVEEKCLKLGADKYIPKPFSIKELIEEVKKLLN
1061	MKSILLVDDSKTLQKIISFALEKEGYTVTLAPDGVEALEKLKEFRPDLIIVDLRMPKMDGFELLRILKNDPELREIPVVVLSGDRSPEVEERALEAGANAYVPKPFSIKELMKIVKELLN
1062	MKTVLLVDDSETMRKIISFALEKKGYKVIYAPNGIEALEKLKKFLPDLIIVDLNMPPMNGFELLKILKNDEKLKKIPVIVLSLDRDPEVEKECLELGANYYIPKPFSIKELMEVVEKLLN
1063	MKSVLLVDDSETLRKIISFALKKRGYTVVYAPNGVEALKKLEEFTPDLIILDLRMPPMNGYEVLKRLKNDEKLREIPVIVLSRDRSPEVEKKALELGANAYVPKPFSIEELMEIAEKLLN
1064	MKKILLVDDSETLRKIIKFALESEGYSVVEAPNGKEALEKLKEFLPDLIILDLSMRPMNGYEVLKILKNDPKLKNIPVIVLSANRDPEVEKKCLELGADKYIPKPFSIKELIEEVKKLLN
1065	MKSILLVDDSETLRKIISFALEKKGYKVIYAPNGKAALEELEKQLPDLIIVDLSMPPMNGLELLKILKEDEKLKKIPVVVISKNRDPEVEKECLEAGADAYIPKPFSIKELMEVVEKLLN
1066	MKSILLVDDSETMRKIISFALESRGYSVVFAPDGVAALEKLKEFLPDLIIVDLRMPKMNGFELLETLRNDPELRKIPVVVLSGDRDPEVEKRALEAGADKYVPKPFSIEELMKIVEELLN
1067	MKSILLVDDSETLRKIISFAIESEGYKVIFAPNGIEALEKLKKFLPDLIIVDLNMPPMNGYELLKILKNDPKLKKIPVIVLSLDRDPEVEKKCLELGANKYVPKPFSIKELMKVIKELLN
1068	MKSILLVDDSETLSKVITFALEKKGYTVTLAPNGIEALKKLEEFLPDLIIVDLSMPPMNGRELLKKLKNDEKLKKIPVIVLSANRDPEVEKECLELGANKYVPKPFSIEELMKIVEELLN
1069	MKTVLLVDDSETLRKIISFALESKGYKVVLAKNGIEALEKLKEFLPDLIILDLRMPKMNGYEVLKILKNNEELKKVPVVVLSKDRSPEVKKKALEAGADAYIPKPFSIQELMEVVEKLLN
1070	MKTVLLVDDSETLRKIISFALEKKGYKVIYAKNGIEALEKLKKQLPDLIILDLDMPPMNGYEVLKILKNDEELKKIPVIVISRNRDPEVEKRCLELGADAYVPKPFSIKELMEIAEKLLN
1071	MKKILLVDDSETLRKIISFALKKEGYEVIYAKNGKEALEKLKKFKPDLIILDLRMPPMNGLEILKILKEDEELKEIPVIVVSADRDPEVEKEALEAGADYYIPKPFSIEELMKKVKELLN
1072	MKSVLLVDDSETLRKIISFALEKEGYKVVYAPNGVEALEKLKEFLPDLIIVDLSMRPMNGRELLKILKEDEKLKKIPVIVLSADRDPEVEEEALKLGANAYVPKPFSIKELMEIAKKLLN
1073	MKSILLVDDSETLRKVIKFALESKGYSVVEAPNGIEALEKLKEFLPDLIIVDLSMPPMNGLELLKILKNDEKLKNIPVIVLSGDRSPEVEKECLEAGADAYVPKPFSIEELMAIVEKMLN
1074	MKSILLVDDSETLRKIISFSLKKEGYEVVFAKNGKEALEKLKEFKPDLIILDLSMPPMNGFEVLEILKNDEELKNIPVIVLSLDRDPEVKKRCLELGANAYVPKPFSIKELMEIVKKLLN
1075	MKKILLVDDSETLSKIISFALKKEGYEVILAKNGIEALEKLKEFLPDLIIVDLNMPPMNGFELLKILKNDEKLKKIPVIVISRNRDPEVEKKALELGADKYVPKPFSIEELMKIVKELLN
1076	MKKILLVDDSETLRKIISFALEKRGYEVIFAKNGKEALEKLKEFLPDLIIVDLSMPPMNGLELLKILKEDEKLKNIPVIVLSADRTPEVKKKCLELGADAYIPKPFSIEELMEVVEKLLN
1077	MKTILVVDDSETLRKVITFALESEGYSVVLAKNGKEALEKLKEFLPDLIICDLSMPPMNGFELLKYLKNNEKLKNIPVVVLSLDSSEEVKKKCLELGANAYIPKPFSIKELMEVVKKLLN
1078	MKTILLVDDSETMRKIISFALEKRGYKVIFAPNGKEALEKLKEFLPDLIIVDLRMPPMNGYELLRILANDPKLRDIPVVVLSLDRDPEVEKRCLELGANAYIPKPFSIEELMEVVEKLLN
1079	MKSILLVDDSETLNKVIKFAIEKEGYKVVLAPDGIAALEKLEKFKPDLIIVDLRMPKMNGFELLKKLKENEELKNIPVIVISRDRSPEVEKEALELGANYYIPKPFSIKELMEVIKKLLN
1080	MKSILLVDDSETLRKIISFGLEKEGYSVITAKNGIEALKKLEESLPDLIIVDLSMPPMNGYELLKKLAEDEKLKNIPVIVLSADRDPEVEEKALKLGAKAYVPKPFSIEELMKIVKELLE
1081	MKSVLLVDDSETLSKIISFALEKRGYKVIRAPDGIEALEKLKEFLPDLIIVDLRMPKMNGFELLKKLKENEELKKIPVIVLSADRSPEVKERALEGGADKYVPKPFSIEELMKVAEELLN
1082	MKSVLLVDDSETLSKIISFALESEGYSVVLAPNGKEALEKLEKFLPDLIIVDLRMPPMDGLTLLKILKNNPELRKIPVVVLSGDRDPEVEKEALEAGADAYIPKPFSIEELMKVVKELLN
1083	MKSVLVVDDSETLNKIITFALESKGYTVVLAKNGKEALEKLKKFLPDLIILDLSMPPMNGFEVLKILKEDEKLKKIPVIVLSANSDPEVKKKALELGANAYIPKPFSIKELMEVVEKLLN
1084	MKSVLLVDDSETLNKVISFALESEGYSVVLAPDGVEALEKLKEFLPDLIILDLRMPKMNGFEVLRILKEDPELRKVPVVVLSLDRDPEVEEKALEAGADAYIPKPFSIKELMEVVKKLLN
1085	MKSVLVVDDSETLRKIITFALEKEGYKVVLAKNGKEALEKLKEFTPDLIIVDLSMPPMNGFELLKILKNDEKLKNIPVIVLSANRDPEVKEKALKLGANAYIPKPFSIQELIEVAKKLLN
1086	MKSVLLVDDSETLQKIISFGLESEGYSVVRAKNGKEALEKLKKFLPDLIIVDLNMPPMNGYELLKILKNDEKLKKIPVVVLSGDRDPEVEEKALELGANAYIPKPFSIKELMEVVKKLLN
1087	MKSILLVDDSETLRKVIKFALEKEGYTVVEAKNGIEALEKLKEFLPDLIIVDLRMPPMNGFELLKKLKEDEKLKNIPVVVLSLDRSPEVEKEALELGANKYIPKPFSIKELMEVVKELLN
1088	MKSILLVDDSETLRKIIKFALEKRGYSVVEAPNGKEALEKLEKFLPDLIILDLNMPPMNGFEVLKILKENEKLKKIPVVVLSADRDPEVEQEALELGANKYVPKPFSIEELMKVVDKLLN
1089	MKSVLLVDDSETLRKIISFALESKGYKVIFARNGIEALKKLEKETPDLIIVDLSMPPMNGFELLRKLKEDEKLKNIPVIVLSGDRSPEVKKRALEAGANAYIPKPFSIEELIKVAEKLLN
1090	MKSILLVDDSETLRKIISFALESEGYKVIYAPNGVEALKKLEEFLPDLIIVDLSMPPMNGLELLKILKNNEKLKKIPVIVISGNRDPEVKEKALEAGANYYIPKPFSIEELIKVAKKLLN
1091	MKTVLLVDDSETLNKVISFALEKKGYKVILAKNGVEALKKLEEFLPDLIIVDLNMPPMNGFELLKILKENPELKNIPVIVLSGDRDPEVEKKCLELGANAYVPKPFSIEELMKIVEELLN
1092	MKSILVVDDSETLRKVITFALESRGYTVILAPNGKEALEKLKKSLPDLIIVDLSMPPMNGFELLKTLKEDEKLRKIPVVVVSADRDPEVEKEALELGADAYVPKPFSISELMEIVEKLLN
1093	MKKVLLVDDSETLRKIISFALESEGYSVVYAPNGIEALEKLKEFLPDLIILDLSMPPMNGFEVLKILKNDEKLKKIPVIVLSANRDPEVEKECLELGANKYVPKPFSIEELMKIVKELLN
1094	MKSVLLVDDSETLRKIISFALEKEGYTVVFAKDGKEALEKLKKFLPDLIIVDLRMPKMDGFTLLKILKEDPELKKIPVIVISADEDPEVKEKALELGADKYVPKPFSIEELMKIVKELLN
1095	MKSVLVVDDSETLRKIITFALESEGYTVTLAKNGIEALKKLEEFLPDLIIVDLSMRPMNGEELLKKLREDEKLRKIPVIVLSADTDPEVEERALELGADKYVPKPFSIKELIKIAKELLN
1096	MKSVLVVDDSEVLRKVITFALESEGWKVILAPDGIEALEKLKEFLPDLIICDLSMPPMNGYELLRILKNDEKLRKIPVIVISGNRDPEVEKRALELGANAYIPKPFSIKELIEVAKKLLN
1097	MKSVLLVDDSEVLRKIISFAIESKGYKVIYARDGVEALEKLEKELPDLIIVDLNMPKMNGLELLKRLKEDEKLKNIPVIVLSRNRDPEVEEECLKAGANAYIPKPFSIQELMKVIDELLN
1098	MKSVLLVDDSEVLRKVISFALESKGYTVIYAPDGIEALKKLEKELPDLIIVDLNMPKMNGLELLKILKNDEKLKKIPVVVLSLDSSEEVKKKCLELGANKYVDKPFSISELMKVVEELLN
1099	MKKILLVDDSETLSKIISFILKSEGYEVVLAPNGKEALKKLEEFTPDLIIVDLRMRPMNGFELLKILKENEKLKNIPVIVVSADRSPEVEEEALKLGANAYVPKPFSPKELLSIVKKMLN
1100	MKSILLVDDSEVMNKIISFAIESEGYKVVLAPNGIEALEKLKKFLPDLIIVDLSMPPMNGYELLKILKNDEKLKNIPVIVLSLDRSPEVKKKALELGADKYIPKPFSIKELMEVIKKLLE
1101	MKTILLVDDSETLRKIIKFALEKEGYKVIEAPNGKEALEKLKEFLPDLIIVDLSMPPMNGFELLKKLKEDEKLRKIPVIVLSGDSSEEVKEKCLKAGADYYINKPFSIKELMEVVKKLLE
1102	MKKVLLVDDSETLAKVISFALEKRGYSVVFAPDGIEALEKLKEFLPDLIIVDLRMPKMNGYELLKILKNDEKLRDIPVVVLSGDRDPEVEKRALELGAKAYIPKPFSIEELMKVVEKLLN
1103	MKSILLVDDSETLRKIISFALEKEGYTVIFARNGKEALEKLKKFRPDLIIVDLSMPPMDGFELLRILAEDEELRGIPVVVLSKDRDPEVEQRALEAGADAYVPKPFSIKELMEVVKKLLE
1104	MKSVLLVDDSETLRKIISFIIEKEGYSVVLAKNGKEALEKLKKFTPDLIIVDLSMPPMNGFELLKILKENEKLKKIPVIVLSLNSDPEVEEEALKLGANKYVPKPFSPKELMKIIKELLN
1105	MKSVLLVDDSETLAKIISFALESRGYTVTLAPNGIEALEKLKEFLPDLIIVDLSMRPMNGFELLKILKNDEELKKIPVVVLSGDRDEEVKEKCLELGANAYVPKPFSIKELMEVVEKLLN
1106	MKSVLLVDDSETMRKIISFALEKEGYTVIFAPDGVEALRKLREQRPDLIILDLSMPKMNGLELLRELAADPELRGIPVVVLSGNRDPEVERECLEAGADAYVPKPFSIKELMEIVKKLLS
1107	MKSILLVDDSETLSKIIKFALEKEGYKVVLAKNGVEALEKLKEFRPDLIIVDLSMPPMNGFELLKKLKEDEELKNIPVIVLSADRDEEVKEKALKAGANKYIPKPFSIEELMKVIKELLE
1108	MKSVLLVDDSETLRKIISFALEKEGYKVIYAKNGIEALEKLKKFLPDLIILDLNMRPMNGFEILKILKNDEKLKNIPVIVLSLNRDPEVEKEALELGANAYIPKPFSIEELLKVAKKLLE
1109	MKSILVVDDSETLRKIITFALESEGYKVVLAKNGKEALEKLKEFLPDLIIVDLRMRPMNGFELLKILKNDEKLKNIPVVVLSRDRTPEVEERCLKLGANKYIPKPFSIKELMKVVKELLN
1110	MKSILLVDDSETLRKIISFALESEGYTVTLAPNGREALEKLKEFLPDLIIVDLRMRPMNGFELLKILKNNPELRKVPVVVLSGNRDPEVEERALEGGANAYIPKPFSIEELMKVVKKLLE
1111	MKSILLVDDSETMRKIIKFALEKEGYKVILAKDGKEALEKLKEFLPDLIIVDLRMPLMDGFELLKILKEDEKLKKIPVIVLSGDRDPEVEKKCLEAGANKYIPKPFSIEELIEVVKKLLE
1112	MKSVLLVDDSETLSKIISFALESKGYTVVRAKNGKEALEKLEEFLPDLIIVDLRMPPMNGLELLKKLKEDEKLKNIPVIVLSADRDPEVEELCLKLGANKYIPKPFSISELIKVAEELLN
1113	MKKILLVDDSETLKKIISFALEKKGYKVILADDGIEALKKLEEFLPDLIIVDLRMPKMNGFELLKILKENEELKKIPVVVISADRDPEVEKKALELGANAYIPKPFSIKELIEVIEKLLN
1114	MKSILLVDDSETLRKVISFALEKEGYTVTYAKNGKEALEKLKKFLPDLIIVDLRMPPMNGYELLKILKNDPELKKIPVIVLSADRDPEVKERALKLGANKYIPKPFSIKELMEVVKKLLE
1115	MKSVLVVDDSETLRKIITFALEKEGYTTVLAPDGIEALEKLKKFLPDLIIVDLSMPKMNGLELLEILKNDEELKNIPVVVISGNRDPEVKERCLKAGANKYVPKPFSIEELMKIVKELLN
1116	MKSVLVVDDSEVLQKIITFALESEGWTVVLAPNGIEALEKLKEFTPDLIIVDLRMRPMNGYELLKILKEDPELKNIPVIVLSTDRTPEVEKKALELGANKYIPKPFSIKELIEVAKKLLN
1117	MKSILLVDDSETLSKIISFALEKEGYKVVKAKDGIEALKKLEEFLPDLIIVDLNMPKMNGFELLKILKNNEKLKKIPVVVLSLDRDEEVKEKCLKAGANAYIPKPFSIEELIEVIKKLLN
1118	MKSILLVDDSETLRKIISFALESEGYKVIFAKNGIEALKKLEKSLPDLIIVDLSMRPMNGFELLKILKNNEKLKKIPVVVLSADSDPEVKERALELGADAYIPKPFSIEELMEVVKKLLE
1119	MKKILLVDDSETLNKIISFALESEGYKVILAKNGKEALEKLKEFTPDLIIVDLSMPPMNGLELLKILKNDEELKKIPVIVLSADRDPEVKEECLKLGANKYVPKPFSIQELMEEVKKLLN
1120	MKSVLLVDDSETLAKIIKFGLEKRGYKVVLAPNGKEALEKLKEFLPDLIIVDLNMPPMNGLELLKILKNDEKLKKIPVIVLSSDRDPEVEKKCLEAGANAYVPKPFSIKELLEIAEKLLN
1121	MKSVLVVDDSETLNKIITFALEKEGYTVTLAPDGVEALKKLEEFLPDLIILDLSMPKMNGYELLKILKENEKLKNIPVIVLSRNRDPEVEEKALKLGANKYIPKPFSIKELIKVAKELLN
1122	MKKVLLVDDSETLSKIIKFALEKEGYEVVLAPNGIEALEKLKEFLPDLIIVDLRMPPMNGRELLKILKEDEKLKKIPVVVLSGDRDPEVEKEALELGADAYIPKPFSIKELMEVIKKKLN
1123	MKSVLLVDDSETLRKIISFALKSRGYTVRFARNGVEALRKLEEFLPDLIIVDLRMPPMDGLELLRRLREDPELREVPVIVLSADRDPEVEQQALEAGADAYVPKPFSISELMEVAEKMLN
1124	MKSVLLVDDSETLSKIISFAIEKEGYTVIFAPDGIEALEKLKEFTPDLIIVDLSMPKMNGLELLKILKNDEKLKKIPVIVLSANSDPEVEQEALEAGADAYVPKPFSISELMEIIKKLLE
1125	MKTVLLVDDSETLAKIIKFALEKRGYKVILARNGKEALEKLKEFLPDLIIVDLSMPPMDGLTLLKILAEDPELRKIPVIVLSANRDPEVEQRALEAGADAYVPKPFSIEELMEIVEELLN
1126	MKSVLLVDDSETLRKIISFALEKEGYTVIFAKNGIEALEKLKEFLPDLIIVDLRMRPMNGFELLKILKNDEELKKIPVIVISGDRDPEVEKKALELGANAYVPKPFSISELMEIAKKLLN
1127	MKSVLVVDDSETLRKVITFALEKEGYKTILAPNGKEALKKLEKELPDLIIVDLSMPPMNGLELLKILKEDEKLKKIPVIVLSADTSPEVEEEALKLGANKYIPKPFSIQELMEVAKKLLN
1128	MKTVLVVDDSETLRKIITFALESRGYKVILAPDGKEALEKLKEFLPDLIILDLSMPPMNGFELLRTLKNDPKLKNIPVIVLSADRSPEVEKKCLELGANYYIPKPFSIQELMEVADKLLN
1129	MKSVLLVDDSETLRKIISFALESKGYKVVFAPDGRAALEKLEEFLPDLIIVDLRMPPMNGLELLRRLREDPELRKVPVVVLSADRTPETEREALEAGADRYVPKPFSIEELIEVVEELLE
1130	MKSILLVDDSETLRKIISFALEKEGYTVIYAPDGIEALKKLEKELPDLIIVDLRMPKMDGFTLLKILKNDEKLKNIPVIVLSADRSPEVEQEALELGADAYIPKPFSIEELMKVAKEMLN
1131	MKSVLLVDDSETLNKIISFAIESEGYKVTLASNGVEALEKLKKFLPDLIILDLRMPKMNGFEVLKILKNDEKLKNIPVVVLSGDRDPEVEKEALELGADKYVPKPFSIKELMEIIKELLN
1132	MKSILLVDDSETLRKIISFALEKEGYTVTYAPDGKEALEKLKKFTPDLIIVDLSMPKMNGFELLKILKNDEELKKVPVIVLSRDRDEEVKEEALKLGANKYIPKPFSIKELIEVVKKLLN
1133	MKSILLVDDSETLAKVIKFALEKKGYKVVLAKNGIEALEKLKEFKPDLIILDLRMRPMNGYEVLKILKNDPELKNIPVVVLSRDRDPEVEERALELGADAYVPKPFSIEELMKIIEKLLN
1134	MKSVLLVDDSETLRKVISFALESEGYTVTYAPNGIEALKKLEEFLPDLIIVDLSMPPMNGFELLKTLKNDEELKDIPVIVLSLDRDPEVEKKALEAGADKYIPKPFSIKELMEVVKKLLN
1135	MKSILLVDDSETLRKIISFALEKKGYTVIEAPNGVAALEKLREQLPDLIIVDLRMPPMDGFTLLRRLAEDPELRGVPVIVLSRDRDPEVEQRCLEAGADAYVPKPFSIEELMKIVEEKLN
1136	MKSILLVDDSETLRKIISFALESRGYTVVLARNGKEALEKLKEFLPDLIIVDLDMPPMNGFELLKILKEDEELKKIPVIVVSRNRDPEVEQKALEAGANAYIPKPFSIKELMEVVEKLLN
1137	MKTVLLVDDSETLSKVISFALEKEGLKVILAPDGIAALEKLKKFKPDLIIVDLRMPKMDGFELLKILKNDEELKNIPVIVISGDRSPEVEERCLELGANKYVPKPFSIKELMKIVEELLN
1138	MKSVLLVDDSETLRKIISFALEKEGYSVIYAPNGIEALKKLEKQLPDLIIVDLNMPPMNGFELLKILKEDEKLKKIPVIVISKDSSPEVEKECLELGADKYIPKPFSIKELMEVVKKLLN
1139	MKSILLVDDSETLRKIISFGLEKEGYTVIFAKDGIEALEKLKEFLPDLIIVDLSMPKMNGYELLKELKNDEKLKNIPVIVLSRDRDPEVEKKALELGANKYVPKPFSIKELLEIIKKLLE
1140	MKKVLLVDDSETLRKVISFALEKKGYSVVYAPNGVEALEKLKEFKPDLIIVDLSMPPMNGFELLKILAEDEELKNIPVIVLSRNRDPEVEEEALKLGANAYIPKPFSISELMEVAEKMLN
1141	MKSILVVDDSETLRKIITFGLEKKGYKVVLAPDGIEALKKLEEFLPDLIIVDLRMPKMNGFELLRILKNDEKLRNIPVVVLSGDRDPEVEEKCLKLGANKYVPKPFSIEELMKIVEELLN
1142	MKSILLVDDSETLNKIISFALESEGYTVTLASNGKEALEKLKESLPDLIICDLSMRPMNGLELLKILKEDEKLKNIPVVVVSGDRDPEVEKKCLEAGANAYVPKPFSIKELMEIVKKLLN
1143	MKKVLLVDDSKTLQKIISFALKSEGYEVVLAENGKEALKKLEKFLPDLIILDLSMPIMNGFEVLKILKNDEKLKEIPVIVLSADRSPEVEKKCLELGADAYIPKPFSIKELMEVVKKKLN
1144	MKTVLLVDDSEVLRKVISFALESKGYKVIYAKNGKEALEKLKKFLPDLIIVDLSMPPMNGYELLKILKNDEKLKNIPVLVISGDRDEEVKEKALKLGANKYVPKPFSISELMEVVEKLLN
1145	MKKILLVDDSETLSKIIKFALEKEGYEVILASNGKEALEKLKEFLPDLIIVDLRMPPMNGYELLRILRNDPKLREIPVVVLSADRTPEVEERALELGANAYVPKPFSIKELMEIIKKLLE
1146	MKTVLLVDDSETLRKIISFALEKEGYKVIFAPNGVEALKKLEEFTPDLIIVDLRMPPMNGFELLRRLREDPELRKVPVVVLSLDRSPEVEERCLELGADRYVPKPFSIKELMEVVKELLN
1147	MKTVLLVDDSETLSKIISFALESEGYKVIRAPNGKEALEKLKKQLPDLIIVDLRMPPMNGLELLKILKNDEELKKIPVIVLSLDRSPEVKKKALEAGANYYIPKPFSIKELIKVVKELLN
1148	MKSVLLVDDSETLSKIISFAIKSKGYSVVLAPNGIEALEKLKKFLPDLIIVDLRMPPMNGFELLKILKNDEKLKNIPVIVLSLDRSPEVEKECLEAGANYYVPKPFSISELMEIIDKLLN
1149	MKSILLVDDSETLRKIISFALEKEGYTVVYAPNGVEALKKLEEFLPDLIIVDLSMPPMNGFELLKELKNNEELKNIPVIVISGNRDPEVEKRALELGANAYVPKPFSIKELMKIVKELLN
1150	MKTILLVDDSETLSKIIKFALESEGYKVILAPNGKEALKKLEKELPDLIIVDLNMPIMNGFELLKILKEDEKLKKIPVIVLSRDRSPEVEKKALELGANAYIPKPFSIKELIEVAKKLLN
1151	MKTILLVDDSETLRKIISFVIESEGYKVIFAPDGIEALEKLKKFLPDLIILDLNMPKMNGLELLKILKNDEKLKKIPVLVLSADRDPEVEKECLEAGADKYVPKPFSTEELMKEIKELLE
1152	MKKVLVVDDSETLRKIITFGLEKKGYSTVLAPNGKEALEKLKEFLPDLIICDLRMPIMNGYELLKILKNDEKLKEIPVIVLSKDRDPEVEKRCLELGANKYIPKPFSIKELMEEVEKLLN
1153	MKKILLVDDSKTLRKIIKFGLEKEGYKVIEAPDGIAALEKLKEFLPDLIIVDLSMPKMNGYELLKILKEDEKLKKIPVIVISRDRDPEVEKKALELGANKYVPKPFSIKELMKIAKELLE
1154	MKSILLVDDSETLRKIISFALKSEGYSVVFAPDGIEALEKLKKFLPDLIILDLSMPKMDGFTLLKILKEDEKLKKIPVIVLSGDRSEEVKEKCLELGANAYVPKPFSIQELMEIVKKLLE
1155	MKKVLLVDDSETLSKIISFALESEGYSVVRAKNGIEALEKLKEFLPDLIIVDLRMPPMNGFELLKILKEDEKLKKIPVVVLSGDRSPEVEEKCLKLGADAYIPKPFSIEELIEVVKKLLE
1156	MKSILLVDDSETLSKIISFAIEKKGYTVVFAPNGIEALKKLEEFLPDLIIVDLEMPPMNGYELLKKLKNNEEWRKIPVVVLSGDRSEEVKKKCLELGADKYIPKPFSIEELMEVIEKLLN
1157	MKSVLLVDDSETLRKIITFALESKGYTVVTAPNGIEALEKLKEFLPDLIIVDLRMPPMDGFELLRILAEDPELRKVPVLVVSLDRDPEVERRALEAGASAYVPKPFSIKELMEIVEKLLN
1158	MKKVLLVDDSETLSKVISFALESEGYSVILAPDGKEALKKLEKELPDLIIVDLRMPKMNGYELLKILKEDEKLKEIPVVVLSGDSDPEVEEKALKLGANYYVPKPFSIKELMEIVKKLLE
1159	MKSILVVDDSETLTKIITFALESEGYTVIRAPNGIEALEKLKEFLPDLIIVDLSMPLMDGFELLKKLKEDEKLKEIPVVVLSKDRDPEVEKEALELGADKYIPKPFSISELMEVVKELLN
1160	MKKILLVDDSKTLRKIISFALESKGYKVIEAPNGIEALKKLEEFLPDLIIVDLNMPPMNGFELLKILKENEKLKKIPVIVLSLDRDPEVEEKCLKGGADKYIPKPFSIEELMKVVEELLN
1161	MKSVLLVDDSETLAKIISFALESRGYKVVLAKNGKEALEKLKKFLPDLIIVDLRMPPMNGFELLKILKEDEKLKKIPVIVLSKDRTPEVEKKALELGANAYIPKPFSIKELMEVAEKLLN
1162	MKKVLVVDDSETLNKIITFALEKEGLKVVLAPNGKEALEKLKEFTPDLIIVDLNMPPMNGFEFLKILKNDEKLKNIPVIVLSSDSSEEVKKKALEAGANYYIEKPFSIEELMKVVKKLLN
1163	MKSVLLVDDSETLRKIISFALESEGYTVTFAPNGIEALKKLEKELPDLIIVDLRMPKMNGLELLKILKEDEKLKKIPVIVLSGDRSPEVEERCLKAGANKYVPKPFSIQELMEIVKELLE
1164	MKSILLVDDSETLRKIISFALEKEGYTVTFAKDGVEALEKLKKFLPDLIIVDLRMPKMDGFTLLKILKNDPKLKKIPVIVVSGDRDPEVEKKALEAGADYYIPKPFSIKELMEVVKKLLN
1165	MKSVLVVDDSKTMRKVITFALEKEGYTVVEAPNGREALEKLKEFLPDLIIVDLRMRPMNGLELLKILKNDEELKNIPVIVLSGDRDPEVEKLALEAGANKYIPKPFSIKELMKVAKELLN
1166	MKSVLLVDDSETLRKIISFALKKKGYKVIFAKDGKEALEKLKEFLPDLIIVDLRMPKMNGFELLKILKNDPELKNIPVIVLSGDRDPEVEEEALKAGANKYIPKPFSIKELMEVVEKLLN
1167	MKTVLLVDDSETLQKIISFALEKEGYKVIRAPNGVAALEKLEEQLPDLIIVDLRMPPMDGYELLRRLAADPELRKVPVIVLSRDRDPEVKERCLALGASAYVPKPFSIEELMKVAKKLLN
1168	MKKILLVDDSETLRKIISFALKSEGYEVVYAPNGKEALEKLKEFTPDLIIVDLSMRPMNGEELLKILKENEKLRKIPVIVLSGDRDPEVEQRALELGANAYIPKPFSISDLMKVVKELLE
1169	MKKVLLVDDSETLSKIIKFALESKGYSVVLAKNGIEALKKLEKFLPDLIIVDLSMPPMNGYELLKILKNDEKLKNIPVVVLSLDRTPEVKERALELGANAYVPKPFSIKELMKIVEKLLN
1170	MKSVLLVDDSETLAKIITFALEKRGYKVILAKNGKEALEKLKESLPDLIIVDLRMPPMNGFELLKILKNDPKLKKIPVIVVSLDRSPEVEEKALELGADKYVPKPFSIKELMEVAEKLLN
1171	MKSVLLVDDSETLRKIISFALEKEGLKVVTARNGKEALEKLKEFLPDLIILDLSMPPMNGFEVLKILKNDEKLKEIPVVVLSRDRTPEVEKRCLELGADKYIPKPFSIKELMKVVKKLLN
1172	MKSILLVDDSETLRKIISFALKKEGYTVIEAPNGKEALEKLKEFLPDLIICDLRMPPMNGFELLKILKEDEKLKNIPVVVLSGDRSPEVEEKCLELGANKYIPKPFSIEELMKVVKELLN
1173	MKSVLLVDDSETLRKVIKFALEKEGYTVIEAKNGKEALEKLKKSLPDLIIVDLRMRPMNGFELLKILKEDEELKKIPVIVLSGDRSPEVEKKALELGADAYIPKPFSIKELMEVAKKLLN
1174	MKSVLLVDDSKTLNKIISFALESKGYTVTLAENGIEALKKLEEFTPDLIILDLNMPKMNGYEILKTLKNNPKLKKIPVVVISGNSDEEVKEKALKLGANKYVTKPFSIEELMKIVEELLN
1175	MKTILVVDDSETLRKIITFALESRGYKVVLAKNGKEALEKLKKFTPDLIIVDLEMPPMNGFELLKILKNNEKLKKIPVVVLSKNRDPEVKEKCLKGGANKYVPKPFSIEELMKIVEELLN
1176	MKKVLLVDDSETLSKVIKFALESEGYEVVLAKNGIEALEKLKEFLPDLIIVDLSMPPMDGFEFLKILKNDEELKKIPVIVLSGDRDPEVEEKCLELGADKYIPKPFSISELIKEVKKLLN
1177	MKSILVVDDSETLQKVITFALESEGYEVKLAKNGIEALEKLKEFLPDLILLDLSMPPMNGYEVLKILKNDEKLKEIPVVVISGNRDPEVEKRALELGADKYIPKPFSIEELMKVVKELLE
1178	MKKILLVDDSETLRKIIKFALEKKGYSVIEAKNGIEALKKLEKFTPDLIIVDLNMPPMNGFEFLKKLKNDEKLKEIPVIVLSADRSEEVKEEALKLGADKYIPKPFSIEELMKVVEKLLN
1179	MKKVLLVDDSETLRKVISFALKSEGYEVVFAPNGIEALKKLEEFLPDLIIVDLDMPPMNGFELLKILKNDEKLKEIPVIVLSRDRSPEVEQRALELGANAYVPKPFSIKELIEIAKKMLN
1180	MKKVLLVDDSETMNKIISFALESKGYSVILAKNGIEALEKLKKELPDLIILDLRMPPMDGLTVLKKLKEDEKLKNIPVIVLSGDRDPEVEKKALEAGANYYIPKPFSITELMEVAEKLLN
1181	MKSVLLVDDSETLQKIISFALESRGYTVVRAPNGKEALEKLEKFLPDLIIVDLRMPPMNGFELLKKLKEDEKLKNIPVVVLSLDRDPEVEKECLEGGANYYIPKPFSIKELMEVVEKLLN
1182	MKSILLVDDSETLRKIISFALESEGYTVVFAPNGKEALEKLKKFLPDLIIVDLRMPPMDGFELLKILKEDEKLKEIPVLVISGDRDPEVEKEALEAGADAYVPKPFSIQELIKIVKELLN
1183	MKSVLLVDDSETLRKIITFALESRGYKVILAKNGKEALEKLEKFLPDLIIVDLSMPPMNGLEFLKILKNDPKLKDIPVIVLSANTDPEVEELCLKAGANAYIPKPFSIEELMKVVEKLLN
1184	MKTVLLVDDSETLRKIIKFGLEKKGYKVIEAKDGIEALEKLKKQTPDLIIVDLSMPKMDGLTLLKILKEDEKLKNIPVLVLSADSDPEVKEKALEAGANAYVEKPFSIEKLLEIVEKLLN
1185	MKSILLVDDSETMRKIISFALEKEGYKVVFAPNGIEALEKLKEFLPDLIIVDLRMRPMNGFELLRILKNNEELKKIPVVVISGDRSPEVEERALKLGANAYIPKPFSIKELIEVIKKLLN
1186	MKSVLLVDDSEVMRKIITFALEKRGYSVVLAPDGIAALEKLKEFLPDLIIVDLSMRPMNGFELLRILANDPELRKIPVIVLSADRDPEVKERALELGADAYIPKPFSIEELMEVAEKLLN
1187	MKSVLLVDDSETLRKIISFGLEKEGYTVVYAPNGIEALEKLKKFLPDLIIVDLSMPPMNGLELLKILKNDPELRKIPVVVISADRDPEVEKECLEAGANKYVPKPFSIEELLKVVKELLE
1188	MKSVLLVDDSETLSKIISFAIESEGYTVVRAPNGIEALKKLEKFLPDLIILDLSMRPMNGFELLKILKEDEKLKNIPVIVLSRDRSPEVEKKCLELGANYYIPKPFSIEELMEVIKKLLN
1189	MKTILLVDDSETLSKIIKFGLEKEGYKVVLAPDGREALEKLKKFRPDLIILDLRMPLMNGYELLRILKEDEELREIPVVVLSTDTTPEVEERALELGADAYVPKPFSIQELLEIIKKLLN
1190	MKKVLLVDDSETMQKIISFALEKEGYEVIRARNGIEALEKLKEFLPDLIIVDLNMPPMNGFEFLKILKNDEKLKNIPVIVLSGDRDPEVEKKALEAGANYYVPKPFSIEELMKIAKKLLN
1191	MKKVLLVDDSETLRKIISFALKSEGYEVILARNGIEALEKLKEFLPDLIICDLRMRPMNGLELLKILKEDEKLKNIPVIVLSGDRDPEVEKKCLEAGANYYIPKPFSISELMEVVKKLLN
1192	MKSVLLVDDSETLRKVISFGLEKEGLTVVFAPNGKEALKKLEEFLPDLIIVDLSMPPMNGFELLKILKNNPELKKIPVVVLSGNRDPEVEKRCLELGADAYVPKPFSIEELLEIVKELLE
1193	MKTVLLVDDSETLSKIISFALESEGLKVIFAPDGIAALEKLEKFLPDLIIVDLNMPKMDGFTLLKRLKEDEKLKKIPVVVISRDRDPEVEERALELGADKYIPKPFSIKELMEVVKELLN
1194	MKSVLLVDDSETLRKIISFALESRGYTVTYAKNGKEALEKLEKFLPDLIILDLSMPPMNGLEVLKILKNNEELKKIPVVVLSADRDPEVEQKCLEAGANAYIPKPFSISELMEVVEKLLN
1195	MKKVLLVDDSETLSKVISFALKKEGYEVVYAPNGKEALEKLKEFLPDLIIVDLNMPPMNGYELLKILKNNEELKKIPVVVISGDRDPEVEKKALELGADAYIPKPFSIEELMKVVKKLLE
1196	MKSILLVDDSKTLRKIISFALEKEGYTVVEAENGIEALEKLKEFLPDLIIVDLSMPPMNGFELLKILKNDEKLKNIPVIVLSRNRDPEVKEKALKAGANAYIPKPFSIKELLEVVKKLLN
1197	MKSVLLVDDSETLRKIISFILESEGLSVVFAPNGKEALKKLEEFLPDLIIVDLNMPPMNGLELLKILKNNEELKNIPVIVLSKDRDPEVEKKCLELGANKYIPKPFSPEELMKVVKELLE
1198	MKTILLVDDSETLRKVISFALEKKGYKVIYAKNGKEALEKLKKFKPDLIIVDLRMPPMNGLELLKILKEDEELKNIPVVVVSADRSPEVEKEALEAGANAYVPKPFSIKELMEIVEKLLN
1199	MKSVLLVDDSETMAKVIKFALEKEGYKVVLAKDGLEALEKLKEFTPDLIIVDLSMPKMNGLELLKILKNDEKLKEIPVIVLSLDSDPEVEKKCLEAGANAYVPKPFSISELMEIAKKLLN
1200	MKSILVVDDSETLRKIITFALESKGYTVILAPNGKEALEKLEESLPDLIILDLNMPPMNGFEVLKKLREDEKLKNIPVVVISRDRSPEVEQRALELGAHKYIPKPFSIEELIKVIEELLN
1201	MKKILLVDDSETLSKIIKFGIEKKGYEVILAPDGISALEKLKEFLPDLIIVDLSMPPMNGLELLKILKNNEELKKIPVIVISSNSDPEVEKECLEAGANYYIPKPFSIKELMEVIEKLLN
1202	MKSVLLVDDSKTMSKVISFALEKEGLKVVLAEDGKEALEKLEEFLPDLIIVDLSMPKMNGFEFLKILKENEKLKNIPVIVLSGNSDPEVKEKCLKLGANKYVEKPFSIQELMKIAKELLN
1203	MKSVLLVDDSETLRKIISFALESEGLSVVFAPNGKEALKKLEEFLPDLIIVDLRMPLMDGFELLKILKEDEKLRNIPVVVISADRSPEVEEEALKLGANKYIPKPFSIKELMKVVKELLN
1204	MKTILVVDDSETLRKIITFALEKEGYKVILAKNGIEALKKLEEFLPDLIIVDLSMPPMNGYELLKILKENEKLKNIPVIVLSGDRDPEVEEKALKLGANAYIPKPFSIKELIEVVKKLLN
1205	MKTILLVDDSETLRKIIKFGLEKKGYKVIEAPNGIEALKKLEKFKPDLIIVDLSMPPMNGFELLKKLKEDPELKNIPVVVLSLDRDPEVEKEALEAGADAYIPKPFSIEELMEVIEKLLN
1206	KKKILLVDDSETLSKIIKFSLEKEGYEVILAKNGIEALEKLKEFKPDLIIVDLNMPPMNGFELLKILKENEELKNIPVIVLSRDSSPEVEKKCLELGANAYVPKPFSIEELMKIAKELLE
1207	MKTVLLVDDSETLRKVISFALESKGYKVIRAKNGKEALEKLKEFLPDLIIVDLSMPPMNGFELLKILKNDEELKKIPVVVLSGDRSPEVEEKALELGADKYVPKPFSISELMEVVEELLN
1208	MKSILVVDDSETLRKIITFALEKEGYTTVLARDGVEALRKLEEFLPDLIILDLRMPPMDGFELLRRLKEDERLREVPVVVLSADRDPEVEERALEAGADAYVPKPFSIEELMEIVKELLE
1209	MKSILLVDDSETLSKIISFALESRGYTVTLAPDGIEALEKLKKFLPDLIIVDLRMPKMNGFELLKILKENEELKKIPVVVLSLDRDPEVKKKCLEAGANAYVPKPFSIEKLMEIVEKLLN
1210	MKTVLLVDDSEVLRKIISFALESEGYKVIYAPNGKEALEKLKKSLPDLIISDLSMPPMNGYELLKILKENPELKKIPVIVISGDRSPEVEKKALELGADKYIPKPFSISELMKEAKKLLN
1211	MKSILLVDDSETLAKIIKFALESRGYTVTLAPDGIAALEKLKKFLPDLIIVDLSMPKMNGLELLKILKNDEKLKKIPVIVLSGNRDPEVEEECLEAGADYYVPKPFSIKELMEIVDKLLN
1212	MKSVLLVDDSEVLRKVISFALESEGLSVTFAKNGIEALKKLEEFLPDLIILDLRMPPMNGLEVLKILKNDEKLKNIPVIVLSGDRDPEVEKKCLEAGANAYIPKPFSIEELMKKIKELLN
1213	MKTVLLVDDSETLRKIISFALEKEGYKVIYAPNGKEALEKLKEFTPDLIIVDLRMPPMNGLELLKILKNNEKLKKIPVIVLSGDRSPEVEEECLKNGANYYVPKPFSIKELIEIAKKLLE
1214	MKKVLLVDDSETLRKIISFALEKEGYKVVFAPNGIEALEKLKEFLPDLIILDLSMPPMNGYEVLKILKEDEELKKIPVVVLSADRSEEVKERALELGADKYVPKPFSIKELIEIVKELLE
1215	MKSVLLVDDSETLRKIISFALESEGYSVVFAPDGVEALEKLKEFLPDLIILDLRMPKMNGFELLKILKNDEKLKNIPVLVLSADRDPEVEKEALELGANAYVPKPFSISELMKIVKKLLN
1216	MKSILVVDDSETLRKVITFALESKGYTVTLAKNGKEALKKLEEFLPDLIIVDLRMRPMDGLTLLKILKNDEKLKKIPVIVLSADRDPEVEKRALELGANAYIPKPFSIKELMEVVEKLLN
1217	MKSVLLVDDSETLSKIISFALESEGYKVVLAPDGKEALEKLKKFLPDLIIVDLRMRPMNGFEFLKILKNDEKLRKIPVVVLSGDRDPEVEERCLKAGADAYVPKPFSIKELMEIVKKLLE
1218	MKKVLLVDDSETLRKIISFALESEGYSVVLAPDGKAALEKLKEFLPDLIIVDLSMPPMNGFELLKILKNDEKLKKIPVLVLSANRDPEVEKEALELGADAYVPKPFSIKELIEIVKKLLN
1219	MKKVLLVDDSETLRKIISFALESKGYTVIYAKNGKEALEKLKEELPDLIILDLSMPPMNGLEVLKILKNDEKLKKIPVIVLSGNSDPEVKELALKAGADKYIEKPFSIKELMEVCEKLLN
1220	KKKVLLVDDSETLSKIISFALKSEGYEVILAKNGKEALEKLKEFLPDLIIVDLNMPIMNGLELLKILKEDEKLKKIPVVVLSRDRSPEVKKEALEAGANAYIPKPFSIEELIEVVKKLLE
1221	MKSVLLVDDSETLSKIISFALEKEGLKVVRAKDGIEALEKLKEFLPDLIISDLRMPKMNGFELLKILKEDEKLKKIPVIVVSGDRDPEVKEKCLKAGANKYVPKPFSIKELMEIVKELLN
1222	MKSVLLVDDSETLRKIISFALESEGYSVIYAPNGIEALKKLEKFLPDLIICDLSMPPMNGYELLKILKEDEKLKKIPVLVLSANRDPEVEKKALELGASAYVPKPFSISELMEIVKKLLN
1223	MKSVLLVDDSEVLAKIIKFALESEGWTVTLAPDGIEALEKLKEFLPDLIIVDLRMPKMNGYELLKILKNDPELKNIPVIVLSKDRSPEVEEKALELGANKYVPKPFSIEELIKVAKELLN
1224	MKSILLVDDSETLRKIIKFALEKEGYTVVEAKNGIEALEKLKKFLPDLIILDLNMRPMNGFELLKILKENEELKNIPVIVLSANRDPEVEKKALELGANAYVPKPFSIEELIKIVKKMLN
1225	MKSVLLVDDSETLSKIISFVLESKGYSVVLAPNGIEALEKLKKFLPDLIICDLSMPKMNGFELLKILKENEELKNIPVIVLSGNRDEEVKKEALELGANAYIPKPFSLKELMEVVEKMLN
1226	MKSVLLVDDSETMSKVISFALEKEGYTVVRAKNGKEALEKLEKFLPDLIIVDLSMPPMNGFELLRILKEDEKLKNIPVVVLSLNRDPEVEKECLEGGANAYVPKPFSISELMEIVKKLLN
1227	MKKVLLVDDSKTLRKVISFALKKEGYEVIEAPNGIEALKKLEEFLPDLIIVDLNMPPMNGFELLKKLKEDEELREIPVIVLSLDRTPEVEKRALELGADKYVPKPFSIEELIKIAKELLN
1228	MKSVLLVDDSETMRKIISFALESEGYSVVFAKNGKEALKKLKEFLPDLIIVDLRMPPMNGFELLKILKNDEELKNIPVVVLSADRSPEVEKEALEAGADKYVPKPFSISELMKIVKELLN
1229	MKKVLLVDDSETLRKIISFALESRGYEVVFAPNGKEALEKLKKFLPDLIIVDLRMPIMNGYELLKILKEDEKLKNIPVIVLSADRSPEVEEKALKLGANAYIPKPFSIEELMEVAEKLLN
1230	MKSVLLVDDSEVLRKVISFALESRGYTVKFAPNGKEALEKLKEFLPDLIIVDLDMPIMNGYELLRILRNDPKLREIPVIVLSRNRDPEVEEKALELGADAYIPKPFSIKELMEVAEKLLN
1231	MKSILLVDDSETLRKIISFALESKGYSVVYAPDGKTALEKLEEFLPDLIIVDLRMPPMDGFELLKTLKENEKLKNIPVIVLTADSSEEVKEKALEAGANYYVSKPFSISELIEIIEKLLE
1232	MKKVLLVDDSETLAKVIKFALEKRGYSVVLAKDGIEALKKLEEFLPDLIILDLRMPKMNGLEVLEILKNDEKLREIPVVVLSADRDEEVKKRCLEAGADAYVPKPFSIEELMEIVEELLN
1233	MKKILLVDDSETMRKIISFALESEGYSVITAPNGKEALEKLKEFLPDLIIVDLRMPPMNGFELLKILKNDEELKKIPVVVLSADRDPEVEKKCLEGGANKYIPKPFSIQELMKVVKELLN
1234	MKKVLVVDDSETLRKIITFALESEGYEVVLAENGIEALEKLKEFLPDLIILDLRMRPMNGFEVLKTLKNDEKLKNIPVIVISGDRDPEVEEKALEAGADAYIPKPFSIKELLEVAKKLLN
1235	KKSVLLVDDSETLRKVISFALESKGYSVIFAPDGIEALKKLEEFLPDLIIVDLRMPKMDGLTLLKILKNDEKLKNIPVIVISADRDPEVEEEALKLGADKYVPKPFSIEELIKIAEELLN
1236	MKSVLLVDDSETLSKVISFALESKGYTVVLAPDGKEALEKLKEFLPDLIIVDLRMPPMNGFELLKILKNDEKLKNIPVVVLSGDRSEEVKKKCLELGADKYIPKPFSIEELLEVVEELLN
1237	MKSVLLVDDSETLRKIISFALEKEGYTVTFAPNGKEALEKLKEFLPDLIIVDLSMPPMNGEELLRILAEDEKLREIPVVVLSADRDPEVEERALELGADAYVPKPFSISELMKIVKELLN
1238	MKSILLVDDSSVLNKIISFALESEGYKVILAEDGIEALEKLKKEIPDLIIVDLRMPKMNGRELLKILKNDEKLKNIPVVVLSKDRSEEVKEEALELGANAYIPKPFSISELMEVVKKLLE
1239	MKSVLLVDDSETMQKIISFALEKEGLSVIRAPNGVEALEKLKEFLPDLIILDLRMPPMNGFEVLEVLKNDEKLRGIPVVVLSADRDPEVEQRALEAGANKYIPKPFSIEELMKVVKELLN
1240	MKSILLVDDSETLRKVISFALESEGYSVVFARNGVEALEKLKEFLPDLIILDLRMPPMNGLELLKRLKEDEPLKKIPVVVLSGDRDPEVKEECLKAGANAYIPKPFSIKELIEVVKKLLN
1241	KKSILLVDDSETLRKIISFALKSEGYTVVFAPNGKEALEKLKEFLPDLIIVDLSMRPMNGFEFLKILKEDEELKKIPVIVLSRDRDPEVEEKALELGANKYIPKPFSIKELIKEVKKLLN
1242	MKKILLVDDSETLQKVIKFGLEKEGYEVILAPNGVEALKKLEEFLPDLIIVDLRMPPMNGYELLKKLKNDEKLKKIPVVVLSGDRDPEVEKRALELGANAYVPKPFSIKELMEIVKKLLN
1243	MKSILVVDDSETLNKVITFALESEGYSVILAPNGIEALKKLEEKLPDLIIVDLSMPPMNGLELLKILKNDEKLKEIPVVVLSGNRDPEVEKKALELGADKYIPKPFSIKELIEEIKKLLE
1244	MKTVLLVDDSEVLSKIIKFALESKGYKVILAKDGIEALKKLEEFLPDLIIVDLRMPKMNGYELLKILKNNEKLKNIPVIVLSADRDPEVEKRALELGANKYIPKPFSISELLKEVEKLLN
1245	MKSILLVDDSETLRKVIEFALKKEGYKVIRAPNGIEALEKLKEFLPDLIIVDLRMPKMNGFELLKILANDEKLKKIPVVVLSGDRDPEVEKRALEGGASAYVPKPFSIKELMEIVKKLLE
1246	MKKILLVDDSETLRKIISFALESKGYEVVYAKNGIEALEKLKEFLPDLIIVDLRMPPMNGFELLKILKEDEKLKKIPVLVLSGDRTPEVRERCLKLGANAYVPKPFSIKELMEIVEKLLN
1247	MKSILLVDDSETLNKIISFALEKKGYKVVLAKDGKEALEKLEKFLPDLIIVDLRMPKMDGFTLLKILKEDEKLKEIPVIVLSLDRDPEVEEKALEGGANKYIPKPFSIKELMEVVEKLLN
1248	MKTILLVDDSEVLRKVIKFALEKRGYKVIEAKNGIEALEKLKEFLPDLIIVDLNMPPMNGFELLKILKNDEKLKNIPVIVISKDRTPEVKEKALKLGANKYIPKPFSIEELMKVVEELLN
1249	MKSILLVDDSETLRKIISFALEKEGYKVILAKNGKEALEKLKEFLPDLIIVDLRMPIMDGYELLKILKEDEELKKIPVVVLSGDRDPEVEEKALKLGADKYIPKPFSIKELMEVVKELLE
1250	MKSVLVVDDSETLRKIITFALESEGYTVVLAKDGKEALEKLKEFRPDLIILDLRMPLMDGRELLKILKEDEELKEIPVVVLSGDRSPEVEKEALELGADKYIPKPFSIEELMRVVKELLN
1251	MKSILLVDDSEVLQKIISFALESRGYKVVRAPNGIKALEELKKFLPDLIIVDLRMPPMNGYELLKILKEDEKLKNIPVVVLSGDSSEEVKKRALELGANKYIEKPFSIKELMEVVEELLN
1252	MKSVLLVDDSETLRKIITFGLEKEGLTVTLARNGREALEKLKEFLPDLIIVDLRMPPMDGLELLKVLKNDPKLKEIPVVVLSADRDPEVKEKCLEAGANAYVPKPFSMKELMEIVKKLLN
1253	MKSVLLVDDSETLRKIISFALEKKGYSVVYAPNGVEALKKLEKFLPDLIILDLSMRPMNGYELLKKLKEDEKLKKIPVIVLSADRSPEVEKKCLELGANAYIPKPFSISELMKVAEKLLN
1254	MKTILVVDDSETLRKIITFALEKRGYKVILAPDGREALEKLEKFLPDLIIVDLNMPPMDGFELLRILKNDEKLKNIPVIVVSADRSEEVKERALKAGANAYVPKPFSIEELMKIVEKLLN
1255	MKSVLLVDDSEVLRKIISFALESEGYSVIYAPNGIEALKKLKEFLPDLIIVDLSMPPMNGLELLKKLKEDEELKNIPVVVISRDRSPEVEKKALEAGANAYVPKPFSIKELIEIIKKLLN
1256	MKSILLVDDSETLRKIISFAIEKKGYKVIYAKDGIEALEKLKKFTPDLIIVDLNMPKMNGLELLKILKNDEKLKKIPVIVLSGDRSPEVKKECLENGANYYIPKPFSIEELMKVIEKLLN
1257	MKKILLVDDSETLSKIIKFALESKGYEVVLAKNGIEALEKLKKFTPDLIIVDLSMRPMNGFELLKILKEDEKLKKIPVVVISADRDPEVEKEALELGANKYVPKPFSIKELMEIIEKLLN
1258	MKSILLVDDSETLRKIISFGLESEGYTVVYAPNGKEALEKLKEFLPDLIIVDLLMPPMNGLELLKILKEDEKLKEIPVIVLSLDRDPEVEQECLEAGANAYIPKPFSIKELLEVIKKLLN
1259	MKTILLVDDSETMRKIISFALESEGYKVIFAPNGKEALKKLEEFTPDLIILDLRMRPMNGYELLKILKNNEKLKKIPVIVLSLDRDPEVEKRCLELGADKYVPKPFSIEELIKIVKELLE
1260	MKKVLLVDDSEVLSKVIKFALEKEGYSVVLAPNGKEALEKLKKFLPDLIIVDLRMPPMDGFELLKILKNDPELKKIPVIVLSRDRDPEVEERALELGADAYVPKPFSIKELMEIAKKLLN
1261	MKKVLLVDDSKTLRKIISFALKSEGYEVIEAPNGIEALKKLEEFLPDLIIVDLSMPLMNGFELLKILKEDEKLKNIPVIVISADRDPEVEKEALELGANAYVPKPFSIKELIEIAKKLLE
1262	MKTVLLVDDSETLSKIIKFALESKGYKVILAPDGIEALEKLKEFLPDLIIVDLSMPKMNGYELLKILKEDEKLKKIPVIVLSLDSDPEVEKKALELGANKYVPKPFSIEELMKIVEELLN
1263	MKSVLLVDDSETLRKIISFALEKEGLKVVFAPDGKEALEKLKKFTPDLIIVDLSMPKMNGFELLKILKNDEKLKEIPVIVISKNRDPEVEERCLELGADKYIPKPFSIEELMKVVKELLN
1264	MKKILLVDDSETMRKAISFIIKKEGYEVIEAKDGIEALEKLKKELPDLIILDLNMPKMNGYEILKILKNNEELKKIPVIVLSGDRDPEVKERCLELGANKYIPKPFSPKELMKVIKELLN
1265	MKKILLVDDSKTLRKIISFAIEKEGYTVIYAPNGKEALEKLKEFTPDLIILDLRMPPMNGFEVLKILKNDEKLKNIPVIVISGDRDPEVEKKALEAGANKYVPKPFSIEELMKIIKEMLN
1266	MKSVLLVDDSETLRKIISFALESEGLTVTFAPNGIEALKKLEEFLPDLIIVDLNMRPMNGFELLKILKNNEKLKNIPVIVLSLDSDPEVKEKALELGANKYIPKPFSIKELMKVVKELLN
1267	MKSVLLVDDSETMQKVISFALEKRGYKVVRAPNGIEALEKLKEFLPDLIICDLSMRPMNGLELLKKLKEDEKLKEIPVVVLSGDRSPEVEKRCLELGADKYIPKPFSIEELMKVVEELLN
1268	MKSILLVDDSETLRKIITFALESRGYTVVTAPNGKEALKKLEEFLPDLIIVDLRMPPMNGFELLKILKNDPKLRNIPVIVLSGNRDPEVKKEALEAGADKYIPKPFSIEELMEVVEELLN
1269	MKSILLVDDSETLAKIIEFALKKEGYTVVRAPDGKEALKKLEKFLPDLIILDLRMPPMNGFELLKILKNNEKLKKIPVIVLSGDRDPEVKERALKLGANKYIPKPFSIKELMKEVEKLLN
1270	MKSILLVDDSETLRKIISFALEKEGYKVIFAPNGKEALEKLKEFLPDLIIVDLSMPPMNGFELLKILKNDEKLKKIPVVVLSRDRDPEVEKRALELGANAYVPKPFSIEELMEIIKELLE
1271	MKSILLVDDSETLRKIISFALEKEGYTVITAKNGKEALEKLKKELPDLIIVDLSMPPMNGFELLKILKNDEKLKNIPVIVVSGNRDPEVEKEALELGANKYVPKPFSIEELMKIVKELLN
1272	MKKVLLVDDSETLRKIIKFALEKEGLEVVEAPNGKEALEKLKEFLPDLIIVDLNMPPMNGLELLKILKNDEKLKNIPVVVLSADRDPEVKEKALEAGANAYIPKPFSIQELMKVVKELLN
1273	MKSVLLVDDSKTLRKIISFALEREGYTVIEAPDGIEALEKLKESLPDLIIVDLRMPKMNGFELLKILKEDEKLKNIPVIVLSADRSPEVEKEALELGANAYVPKPFSISELMSIAKKLLN
1274	MKSVLLVDDSETLSKIISFALEKEGYSVVLAKNGKEALEKLKEFLPDLIIVDLSMPIMNGFELLKKLKEDPELKNIPVIVLSGDRSEEVKKKALEAGANAYIPKPFSIKELMEVAKKLLN
1275	MKSILLVDDSETLRKIISFALEKEGYTVIFAPNGKAALEKLKEQRPDLIIVDLSMPIMDGETLLKILKEDEELREIPVIVLSGNRDPEVEERCLELGADAYIPKPFSIKELMKEVKKLLN
1276	MKSILLVDDSETLQKIISFALEKKGYKVVRAKNGKEALEKLKEFLPDLIIVDLRMRPMNGFELLKVLKEDEELKKIPVIVLSRDRTEEVKEKALELGANKYVPKPFSIKELMKIIEELLN
1277	MKSILVVDDSEILNKVITFALKSRGYSVILAPNGKAALEKLKEFLPDLIIVDLNMPIMNGYELLKKLKNDPKLKNIPVIVLSLDSDPEVKEKCLKLGADKYIPKPFSIKELMEVVDELLN
1278	MKSVLLVDDSETLQKIISFALESEGYKVILAPNGKKALEELKKFLPDLIIVDLSMRPMNGFELLRILKEDPKLKKIPVIVLSANRDPEVEQEALEAGADAYIPKPFSIQDLMAVAKKMLN
1279	MKSVLLVDDSETLRKIISFALESKGYKVVFAKNGKEALEKLKEFLPDLIIVDLRMPPMNGYELLEILKNDEKLKNIPVVVLSGDRDPEVEERCLKLGADKYIPKPFSIEELLKVVEELLN
1280	MKKVLLVDDSETLRKIISFGLKSKGYSVVYAPDGIEALEKLKEFLPDLIILDLRMPKMNGLEVLKILKNDEKLKNIPVIVLSLDRTPEVEEECLKAGANAYVPKPFSIKELLEIAEKLLN
1281	MKSVLLVDDSETLRKVISFALEKEGYKVVTAPNGIEALKKLEEFLPDLIIVDLRMPPMNGFELLKILKENPELKKIPVIVLSLDRTPEVKKKCLEAGANYYVPKPFSISELMEIVKKLLN
1282	MKKVLLVDDSETLAKVIKFALEKEGYSVVLAPNGKAALEKLKKFLPDLIIVDLRMPPMNGLELLKILKNDEKLKNIPVIVLSGDRSPEVEEECLKAGANKYIPKPFSIKELMEVAKKLLN
1283	MKSILLVDDSETLNKIISFALKKEGYSVVLAPDGKEALEKLKEFLPDLIIVDLSMPPMNGYELLKILKEDEKLKKIPVVVISADRSPEVEKRALELGADAYVPKPFSIEELMKIVKELLE
1284	MKSILLVDDSETLSKIITFAIESKGYSVILAPNGKEALEKLKEFTPDLIILDLSMRPMNGLEVLKTIKEDEELKNIPVIVLSANRDPEVEEKCLEAGANKYVPKPFSIEELMKIIEELLN
1285	MKSVLLVDDSETLSKIISFALEKRGYKVIFAKNGKEALEKLKEFKPDLIILDLNMPIMNGFEFLKILKEDEELKNIPVIVLSRNRDPEVEEKALEAGANKYVPKPFSIEELMKIADELLN
1286	MKSVLLVDDSETLRKIISFALESEGYTVIFAKNGIEALEKLKEFLPDLIIVDLRMPPMNGFELLKKLKEDEELKNIPVIVLSTDRDPEVEEKCLELGANAYVPKPFSIKELMKIAKKLLN
1287	MKTILLVDDSETLRKIISFALEKEGYKVIYAKDGIEALEKLKKFLPDLIICDLRMPKMNGFEFLKILKENEELKKIPVIVLSLDRDPEVEQECLELGANKYIPKPFSISELMKVVKELLN
1288	MKSVLLVDDSETLRKIITFALESRGYTVVLAKDGIEALEKLKEFLPDLIIVDLNMPKMNGLELLKILKEDEKLKNIPVIVISLDRDPEVEKECLEAGANKYVPKPFSIKELMEIVDKLLN
1289	MKTVLLVDDSETLSKIISFALESRGYKVVLAPNGKEALEKLEKFLPDLIIVDLRMRPMNGYELLKKLKEDEKLKEIPVIVISRDRSPEVEEKALELGADKYVPKPFSIEELMKIVDELLN
1290	MKSVLLVDDSKTLRKVITFALKKEGLTVIEAPNGIEALEKLEEFLPDLIIVDLNMPPMDGFELLKILKNDEERKKIPVVVLSGDSDPEVKEKALELGANYYIEKPFSIKELMEVIKKLLN
1291	MKTILVVDDSEVLQKIITFALESEGYKVIRAKNGIEALKKLKEQLPDLIIVDLRMPLMNGYELLKILKNDEKLKKIPVIVLSADRDPEVEKRCLELGANAYIPKPFSIKELMEVVKKLLN
1292	MKSILLVDDSETLSKVISFALEKEGYKVTLAKDGKEALEKLEKFLPDLIIVDLRMRPMNGLELLKILKENEKLKNIPVVVLSGDRDPEVEKECLELGADKYIPKPFSIKELMEVVKELLE
1293	MKTVLLVDDSETLNKIISFALESRGYKVIRAPNGKEALEKLKKFLPDLIIVDLSMPPMDGFELLRILKEDPELRKIPVVVLSLNRDPEVEQRCLELGANKYIPKPFSIKELMEVVEKLLN
1294	MKSILLVDDSETLRKIISFAIEKEGYKVIFAKNGKEALEKLKEFLPDLIIVDLRMPPMNGLKLLEILKNNEKLKNIPVVVLSGDRDPEVEEKALKAGANYYIPKPFSIKELMEVIKKLLN
1295	MKSVLVVDDSETLRKIITFALESKGYKTVLAPNGKEALEKLKEFLPDLIIVDLSMPPMNGLELLKILKNDEKLKKIPVVVLSKDRDPEVEKKCLEAGANAYIPKPFSIEELMKVIEKLLN
1296	MKSILLVDDSETLLKIISFALESEGYTVVRARNGVEALEKLKEFLPDLIIVDLSMRPMNGFELLKILKNDEELKKIPVVVLSRNRDPEVKEECLKLGANAYVPKPFSIKELMKIVKELLN
1297	MKSILLVDDSETLRKIISFALESEGYSVVFAKDGIEALEKLKEFLPDLIILDLRMPKMNGYEVLKILKNDEELKKIPVIVLSKDRTPEVEKRALELGANKYIPKPFSIEELMKVVKELLN
1298	MKKVLLVDDSETLRKIISFALKKEGYEVVFAENGKEALEKLKEFLPDLIIVDLRMPIMNGYELLKILKNDEELKNIPVIVLSGDRDPEVEKKALELGANKYIPKPFSIEELMKVAKELLN
1299	MKKVLLVDDSETMRKIISFALKKKGYEVVLAKNGKEALEKLEKFLPDLIIVDLRMPPMNGFELLKILKNNPELKNIPVVVLSGDRSPEVEEEALKAGANAYVPKPFSIEELMKIVEELLN
1300	MKKVLLVDDSETLRKIISFAIKSKGYEVIFAPNGKEALEKLKEFLPDLIIVDLSMPLMNGFELLKILKNDEKLKNIPVIVISGNRDPEVEKEALELGANAYVPKPFSIEELMKIIEKLLN
1301	MKKVLLVDDSETLNKIITFALESEGYEVVLAPDGIEALEKLKEFLPDLIIVDLRMPKMNGFELLKILKEDEELKNIPVVVLSADRSEEVKERALELGANAYIPKPFSISELMKVVKELLE
1302	MKKILLVDDSETLRKIISFALKSKGYEVIYAPNGKEALEKLKKFLPDLIICDLRMPPMNGYELLKILKNDEKLKKIPVIVLSADRSPEVEKKALELGANKYVPKPFSISELMEIVEKLLN
1303	MKTVLLVDDSETLRKIISFALEKEGYKVVFAKNGIEALEKLKKFLPDLIIVDLSMPPMNGFELLKILKNDEKLKKIPVIVLSADRDPEVEKKCLELGANKYIPKPFSIEELMEVAKELLE
1304	MKKVLVVDDSKTLNKIITFALKSEGYEVILAENGIEALEKLKEFLPDLIIVDLRMPPMNGFELLKILKNDEKLRDIPVIVLSGDTSPEVKEEALKLGADKYIPKPFSIEELIKVAKELLN
1305	MKSVLLVDDSETMRKIISFALESRGYTVVYAPNGIEALKKLEEFLPDLIIVDLRMPPMNGFEFLKILKNNEELKNIPVIVLSGDRSPEVEEKALELGADKYVPKPFSIEELMEIVEEMLN
1306	MKSILLVDDSETMAKIIKFALEKEGYTVVLAKNGKEALEKLEKFTPDLIIVDLRMRPMNGFELLKKLKEDEKLKNIPVVVLSTDSDPEVKEKCLKAGANAYVEKPFSIKELIEIIKKLLN
1307	MKTVLLVDDSETLSKIIKFALESEGYKVVLAKNGKEALEKLKEFLPDLIILDLNMPPMNGLEVLKELKNDEERKKIPVIVLSGNRDPEVEEKCLEAGADKYIPKPFSIKELIKVVKELLN
1308	MKKILLVDDSETMNKIIKFALEKEGYSVVLAKNGKEALEKLKEFKPDLIIVDLSMPPMNGFEFLKILKNDEELKNIPVIVLSGDRDPEVEKEALELGANKYIPKPFSIKELMEEVKKLLN
1309	MKKVLLVDDSETLQKVISFALESKGYSVIRAPNGKAALEKLKKFTPDLIIVDLRMPPMDGLTLLKILKNDEKLKKIPVIVLSLDSDPEVKQKCLEAGANKYIEKPFSIEELMKVVEELLN
1310	MKSVLLVDDSETLRKIISFALEKRGYTVVLAPNGKEALEKLKEFLPDLIIVDLNMPPMNGFELLKILKNDEKLKNIPVIVLSLDSDPEVKEKALKAGANAYIPKPFSIEELMEVAEKLLN
1311	MKKVLVVDDSETLRKIITFALESEGLEVVLAPDGKEALEKLKEFLPDLIIVDLDMPKMNGFELLRILKNDEKLKKIPVVVISKDRSPEVKEEALKLGADKYVPKPFSISELMKIVKELLN
1312	MKSVLLVDDSETLRKVISFALESRGYSVVYAPNGKEALEKLKEFLPDLIIVDLNMPPMNGFELLKTLKENEELKNIPVIVLSRDRDPEVKEEALELGADKYVPKPFSIKELMEIVEELLN
1313	MKSVLLVDDSETLSKIIKFALEKRGYKVILAPNGREALEKLKEFLPDLIIVDLRMPPMNGFELLKELKNDEKLKKIPVVVLSGDRDPEVEKRCLELGADKYVPKPFSIEELMEVVEELLN
1314	MKKILLVDDSETLRKIISFGLEKKGYEVILAPNGKEALKKLEEFTPDLIIVDLRMPPMDGFELLKKLKEDEKLKNIPVIVLSADRSPEVEEKALELGADAYVPKPFSISELMEIVEKMLN
1315	MKSVLLVDDSEVLRKVISFALESRGYSVILAPNGVEALEKLKEFLPDLIIVDLRMRPMDGFELLRRLREDPELREVPVIVLSGDRTPEVEERCLELGADAYVPKPFSIKELMEIVEKLLN
1316	MKSVLLVDDSETLSKIISFALESEGLSVVRARNGVEALKKLEKFLPDLIILDLSMPPMNGFELLRKLKEDEKLKEIPVVVLSLNRDPEVEKEALELGADAYIPKPFSISELMKVVKELLE
1317	MKTILLVDDSETLSKIISFALEKEGYKVVLAPNGKEALEKLKKFLPDLIICDLYMPPMNGEELLKILKNDEKLKKIPVIVLSKDRDPEVKEKALKLGANKYVPKPFSIKELMEIVKELLN
1318	MKSVLLVDDSETLRKVISFALEKRGYTVVEAPNGVAALEKLEKFLPDLIIVDLRMPPMNGFELLKRLKNDEKLRKIPVVVLSLDRSPETEKKALEAGADKYIPKPFSIEELMKVVDELLN
1319	MKTILLVDDSETLRKIISFALESKGYKVIRAPDGIEALEKLKKFLPDLIIVDLSMPKMNGLELLKILKNDEKLKKIPVIVVSGDRDPEVEKKALELGANKYIPKPFSIEELMKEVEKLLN
1320	MKSVLLVDDSETLAKIISFALEKKGYTVKLAKNGKEALEKLKEFLPDLIIVDLRMPPMNGREFLKILKEDEELKKIPVIVLSGDRDPEVEKEALELGANKYVPKPFSIEELIKVAEKLLN
1321	MKSILLVDDSETLSKVIKFALESEGYTVILAKNGIEALEKLKEFLPDLIIVDLNMPPMNGFELLKILKEDEKLKKIPVVVLSLDRDPEVKERCLELGANAYIPKPFSISELMKVVKELLN
1322	MKKVLLVDDSETLQKIISFALESRGYEVVRAKNGKEALEKLKEFLPDLIILDLRMPPMNGFEVLKILKNDEELKKIPVVVLSGDRDPEVEERALELGANAYIPKPFSIKELMEVVEKLLN
1323	MKSVLLVDDSETLRKIISFALEKEGYTVIFAKNGIEALEKLEKSLPDLIICDLSMPLMNGFELLKILKENEELKNIPVVVISKDRDPEVEKECLELGANKYVPKPFSIKELIKIIKELLN
1324	MKSILLVDDSETMRKIIEFALKKEGYSVVRAPNGIEALRKLKEFRPDLIIVDLRMRPMDGFTLLKILAEDPELRGIPVVVLSRDRSPEVEERALAAGANAYVPKPFSIEELMKIVEELLN
1325	MKKILLVDDSKTLRKIISFALESKGYSVVEAPDGIEALKKLEEFTPDLIIVDLRMPKMNGFELLKILKNNEKLKNIPVVVISADRDPEVEEKCLEGGANKYVPKPFSIKELMEIVDELLN
1326	MKSVLLVDDSETMRKIISFALESRGYTVIFAPDGKEALEKLEKQLPDLIIVDLNMPPMNGFELLKVLAEDEKLKEIPVVVLSTDRDPEVKERALKAGANAYVPKPFSIKELMEIVDKLLN
1327	MKSVLLVDDSETLRKIISFALESRGYTVIYAPNGKEALEKLKEFKPDLIICDLNMPPMNGFELLRILKEDEELKNIPVVVLSADRDPEVEKRCLEAGANAYVPKPFSISELMEIVDKLLN
1328	MKSVLLVDDSKTLQKVISFALESKGYTVILANNGKEALKKLEEQLPDLIILDLNMPPMNGLELLKILKNDEKLKEIPVIVISRNRDPEVEQLALEAGANYYIPKPFSIQELMEVAEKLLN
1329	MKSILLVDDSETLRKIISFALESEGYSVVFAPDGIEALKKLEKFLPDLIILDLNMPKMNGLEVLKILKNDEKLKKIPVIVLSADRTPEIEQKCLELGADYYIPKPFSISELMEVVKKLLN
1330	MKKVLLVDDSETLRKIISFALEKRGYSVVFAPDGIEALKKLEEFLPDLIILDLRMPKMNGLEVLKILKNNEELKKIPVVVLSADRDPETEKRCLEAGANAYIPKPFSIKELMEVVDKLLN
1331	MKSVLVVDDSETLAKVITFALEKKGYKVVLAPNGIEALEKLKEFLPDLIILDLRMPPMNGYELLRILKNDEELRKVPVVVLSRDRSPEVEKRALELGANAYVPKPFSIEELMEIVEKLLN
1332	MKSVLLVDDSETLRKIISFALEKEGYTVIYAPDGIEALKELEKFTPDLIIVDLRMPPMNGFELLKILKNDEKLKNIPVIVLSLDRDPEVEEKALKLGANKYVPKPFSIKELIEEVKKLLN
1333	MKSVLLVDDSETLRKIISFALESRGYSVILAPNGKEALEKLKKSLPDLIILDLRMPPMNGREVLKILKNDEKLRGIPVIVLSADRSPEVEKEALELGADAYIPKPFSIEELMKVAEELLN
1334	MKSILLVDDSETLRKIISFALESKGYSVIYAKNGIEALKKLEEFLPDLIIVDLSMPPMNGLELLKILKNNEKLKNIPVIVLSGNRDPEVEKEALEAGANAYVPKPFSISELMKIVEEMLN
1335	MKSVLLVDDSETLAKIITFALEKEGYSVVLAPNGKEALEKLKEFLPDLIIVDLDMPPMNGFELLRTLKNDPKLREIPVIVLSTDSDPEVEERALELGADAYVPKPFSIEELMEIAKKLLN
1336	MKSILLVDDSETMRKIISFALESEGYTVVFAPNGKEALEKLKKFLPDLIIVDLRMRPMNGFELLKILKENEELKKIPVIVLSGDSSPEVKKKALEAGADYYIEKPFSIEELMEVVKKLLE
1337	MKKVLLVDDSEVMRKIISFALRSEGYSVVYAKNGKEALEKLKEFLPDLIIVDLRMPPMDGFELLKILKNDEKLKNIPVIVLSADRDPEVEKEALELGANKYIPKPFSISELIKVAKELLN
1338	MKSILLVDDSETLRKIISFALEKEGYKVIFAPDGIEALEKLKKFTPDLIIVDLRMPKMNGFEFLKRLKEDPKLKKVPVIVLSGDRTPEVEKRALELGANKYIPKPFSIEELMKVAKELLN
1339	MKSILVVDDSETMRKIITFALESEGYTVILAPNGKEALEKLKKFTPDLIISDLRMPIMNGYELLKILKNDEKLKEIPVVVLSADRDPEVKEKALELGANKYIPKPFSISELMEVVKELLN
1340	MKSILLVDDSETLRKIISFSLEKKGYTVIYAKNGIEALKKLEEFLPDLIIVDLRMPPMNGYELLKILKNNEELKKIPVVVLSADRDPEVKKKALELGANAYVPKPFSIKELMEIVEKLLN
1341	MKKILLVDDSKTMRKIISFALKSRGYSVIYAENGKEALEKLKEFLPDLIIVDLRMPPMNGFELLKILKEDEELKNIPVLVISGDRDPEVEKRCLELGANAYVPKPFSISELMEIVEKLLN
1342	MKTVLLVDDSETLRKIISFALEKKGYKVVYAKDGIEALEKLKEFLPDLIIIDLNMPKMNGYELLKILKNDEKLKNIPVIVLSGDRTPEVEKKCLELGANYYIPKPFSINELMEVVEKLLN
1343	MKSVLLVDDSETLRKIIKFGLEKEGLKVIEAPNGIEALKKLEKFLPDLIILDLRMPPMNGFELLKILKNNEELKKIPVIVLSGDRSEEVKEKALELGADKYIPKPFSIEELMKVVKEMLN
1344	MKTVLLVDDSETLRKIISFALEKEGYKVIYAPDGKEALEKLEEFLPDLIIVDLNMPPMNGFELLKKLKEDEKLKNIPVVVISLDRDPEVKKEALEAGANKYVPKPFSIKELMEVVKKLLN
1345	MKSILLVDDDETLAKIISFALESEGYSVTLAPNGIEALEKLKKFLPDLIIVDLRMRPMNGYELLKILKENEKLKKIPVIVLSGDRSEETKKKCLELGANAYIPKPFSISELMEVVKKLLE
1346	MKTILLVDDSETMSKIISFALEKEGYKVVLAKDGIEALEKLKEFLPDLIIVDLRMPKMNGFELLKILKNNEELKKIPVVVLSGDRDPEVEKKCLELGADKYVPKPFSIKELMKIVKELLN
1347	MKSVLLVDDSKVLNKIISFALESEGYTVTLAEDGIEALKKLEESLPDLIILDLRMPKMNGLELLKKLKNDEKLKKIPVIVLSGDRDPEVKEKALKAGANAYIPKPFSISELMKVAKELLN
1348	MKSVLLVDDSKVLRKIISFILESEGFTVVEAPNGKEALKKLEEFLPDLIIVDLRMPPMNGLELLRILKEDEKLREIPVVVLSGDRDPEVEQEALEAGANKYIPKPFSPRELLKVCKELLN
1349	MKSVLLVDDSETMRKIISFALEKKGYTVTLAPNGKEALEKLKKFTPDLIIVDLRMPPMNGFELLKILKNDPKLKNIPVVVVSGDRTEEVKKKCLEAGANAYVPKPFSIEELMKIVEKLLN
1350	MKKVLLVDDSETLRKIISFALKSKGYEVIFAPNGKAALEKLKEFLPDLIILDLSMRPMNGYEVLKILKENPELKKIPVIVLSADRSPEVEEKALELGANKYIPKPFSIQELMEVVDELLN
1351	MKKVLLVDDSETLRKIIKFALEKEGLKVIEAKDGIEALEKLKKELPDLIIVDLNMPKMNGFELLKILKEDEKLKNIPVIVLSADRSEEVKEECLKLGANKYVPKPFSIKELMKIVKELLN
1352	MKSILLVDDSETMSKIISFALESEGYSVVLAPDGIEALEKLKEFLPDLIIVDLRMPKMNGLELLKILKNDEKLKNIPVVVLSADRDPEVEEKCLEAGADKYVPKPFSIQELMKIVKELLN
1353	MKSVLLVDDSETLRKIISFALKSRGYKVVFAPNGIEALEKLKEFLPDLIILDLNMPPMNGFEVLKILKEDEKLKNIPVIVLSLDSSEEVKEECLKAGANKYISKPFSIQELMKVAEELLN
1354	MKTILVVDDSETMRKIITFALESEGYKTILAKDGIEALKKLEKFTPDLIIVDLSMPKMNGFELLKILKNNEKLKNIPVIVLSLDRSPEVEKECLEGGANAYIPKPFSIKELMEVVKKLLN
1355	MKSVLLVDDSETLRKIITFALEKEGYSVILAKNGIEALKKLEKELPDLIIVDLRMRPMNGFELLKILKENEKLKNIPVIVISGDRDPEVEEKCLKLGANKYIPKPFSIKELIEVAKELLN
1356	MKKVLLVDDSETLRKIIKFALEKKGYEVIEAPNGKEALEKLKEFLPDLIIVDLRMPPMNGLELLKILKNDEKLKDIPVVVISLDRTPEVEKKCLEAGANKYVPKPFSIEELIKIVEELLN
1357	MKTILLVDDSKTLRKIISFALEKEGYSVIEAPNGIEALEKLKEFLPDLIILDLSMRPMDGFEVLKILKEDPELKNIPVVVLSADSSPEVKERCLELGADKYIPKPFSIEELIKVIKELLE
1358	MKSILLVDDSETLRKIISFALESEGYKVIYAPNGKEALKKLEEFLPDLIIVDLSMRPMNGLEFLKILKNDEKLKNIPVVVLSANRDPEVEKECLEAGANAYVPKPFSIKELMKIVKKLLN
1359	MKSVLVVDDSETLRKIITFALEKEGLTVILAPNGIEALKKLEETLPDLIIVDLSMPPMNGFELLKILKNNEKLKKIPVIVLSLDRSPEVEKRCLELGANKYVPKPFSIEELMKVVKKLLN
1360	MKSVLVVDDSETLRKIITFALEKEGYKVVLAKNGVEALEKLKEFKPDLIIVDLRMPPMNGFELLKILKNDEELKNIPVIVISADRDPEVKEECLKLGANKYIPKPFSIKELIEVAKKLLN
1361	MKKVLLVDDSETLRKIIKFALESEGWEVVEAPNGVEALKKLEEFLPDLIIVDLNMPPMNGYELLKKLKNDPKLKKIPVIVLSANRDPEVEKKALELGADKYVPKPFSIEELIEIAKELLN
1362	MKSVLLVDDSETLRKVISFALESKGYKVIFAPNGKEALEKLKEFLPDLIIVDLSMPPMNGLELLKILKEDEKLKEIPVIVLSRNRDPEVEKKALEAGANKYIPKPFSIKELLEVVEELLN
1363	MKKILLVDDSETLRKVISFGLEKEGYKVVFARDGVEALKKLEKFTPDLIIVDLSMPKMNGFEFLEKLKNDEKLKKVPVIVISGNRDPEVKEKCLEAGANAYIPKPFSIKELMKKVKELLE
1364	MKSILLVDDSETLSKIISFALKSEGYTVTLAKNGIEALKKLEEFLPDLIIVDLSMPPMNGFELLKILKNDEKLKNIPVIVISKDRDPEVEKRCLELGANKYIPKPFSIKELMEEVKKLLN
1365	MKSILLVDDSETLSKIISFGLEKEGYTVTLAKDGIEALEKLKEFTPDLIILDLNMPKMNGFKLLEILKNDEKLKNIPVIVLSLDRDPEVEKRALELGANKYIPKPFSIEELLKEVKKLLN
1366	MKSILLVDDSETLRKIISFGLEKEGYKVIYAKNGKEALEKLKEFKPDLIIVDLSMPPMNGFELLKILKEDEELKEIPVIVLSRNRDPEVEKEALELGANAYIPKPFSIEELLKKIKELLN
1367	MKKVLLVDDSETLRKIISFALESEGYEVVFAPDGREALEKLKEFLPDLIIVDLSMPKMNGRELLRILANDPELRKVPVIVLSKDRDPEVEKEALELGADAYIPKPFSIKELIEVAKKLLE
1368	MKSILLVDDSETLRKIISFALESKGYSVVFAKNGIEALKKLEEFLPDLIILDLNMPPMNGFEVLKKLKEDEKLKKIPVIVLSKDRSPEVEKKALELGANKYIPKPFSIKELIEVVEKLLE
1369	MKSILLVDDSETLRKIISFALESEGYSVIFAPNGIEALKKLEESLPDLIIVDLRMPPMNGFELLKILKNNEELKKIPVIVLSGDRDPEVEKEALELGADKYVPKPFSIKELMEVVKELLE
1370	MKTVLLVDDSETLRKIISFALKSEGYTVIEAKNGIEALEKLKKSLPDLIIVDLNMPLMNGLELLKILKEDPELKNIPVVVLSLDRDPEVEEKCLKAGANKYIPKPFSIKELIEVIKKLLN
1371	MKKVLLVDDSETLRKIISFALEKEGYKVIFAKNGKEALEKLKKELPDLIIVDLRMPPMNGYELLKILKEDEKLKKIPVIVLSGDRDEEVKERALELGADAYIPKPFSIEELMKVVKEMLN
1372	MKKVLLVDDSETLRKIISFALEKEGYSVIYAKNGIEALKKLEKFKPDLIIVDLKMPPMNGFELLKILKEDPELKKIPVIVISGDRSPEVEEEALKAGANAYVPKPFSIKELMKIVKKMLN
1373	MKSVLVVDDSKTLNKIITFSLEKEGYSVTLAPNGVEALEKLKESLPDLIIVDLRMPPMDGFELLKILAEDPELRKVPVIVVSRDRDPEVEKRCLEAGADAYIPKPFSIKELMEVVKKMLN
1374	MKSVLLVDDSETLRKIISFALESEGLTVVTAKNGIEALKKLEKFLPDLIILDLSMRPMNGFEVLKKLKEDEKLKKIPVIVLSLDRDPEVEEECLKGGANYYVPKPFSIQELIEIVKKLLE
1375	MKTVLLVDDSETLRKIISFALKSKGYSVIYAKDGIEALKKLEKELPDLIIVDLSMPKMNGFELLKKLKEDEKLKNIPVIVLSTNRDPEVKEKCLELGADKYIPKPFSIKELLEVAEKLLN
1376	MKTILLVDDSETLRKIISFALEKKGYKVIYAKNGIEALEKLKEFLPDLIIVDLSMPPMNGFEFLKILKEDEKLKNIPVIVISADRDPEVKEKALELGADKYIPKPFSIEELMKVVEKLLN
1377	MKKILLVDDSETLRKIISFGLEKKGYSVIYAPDGVEALEKLKEFLPDLIIVDLSMPKMNGLELLKILKNNPELKKIPVVVISGNRDPEVEEECLKAGADKYVPKPFSIKELMEIVEELLN
1378	MKKILLVDDSETLSKIIKFALESEGYEVVLAPNGIEALKKLEKFLPDLIIVDLSMRPMNGFELLKILKNDEELKKIPVVVISADRDPEVEKKCLELGADKYIPKPFSISELMKVIKELLN
1379	MKSVLLVDDSEVLQKIISFALEKRGYSVIRAPNGKAALEELEKQKPDLIIVDLDMPPMNGFELLKKLKEDEELKNIPVVVLSRNSDPEVKKEALELGADKYIPKPFSIQELMEVVEKLLN
1380	MKSILLVDDSETLSKVIKFALESEGYTVVLAPNGKEALEKLKKFTPDLIIVDLRMPPMNGFELLKILKNDPKLKNVPVIVLSADRSPEVKQKCLEAGADKYIPKPFSIEELMKVVKELLN
1381	MKSILVVDDSETLRKIITFALESKGYSVILAPNGKEALEKLKKSLPDLIIVDLSMPPMNGLELLKILKEDEELKKIPVLVISLDRDPEVEEECLKAGANAYVPKPFSISELMKIVEKLLN
1382	MKSVLLVDDSETLRKIISFALESKGYKVVYAKNGIEALKKLEKFLPDLIIVDLRMRPMNGFELLKKLKENEELKNIPVIVLSADSSPEVKEEALKAGANKYIEKPFSISELMEVVDELLN
1383	MKKVLLVDDSETLRKIISFALKSEGYEVIFARNGKEALEKLKKELPDLIIVDLRMPPMNGYELLKILKEDEKLKKIPVVVISGDRDEETKKRALELGANKYVPKPFSIKELIEIVKKLLN
1384	MKTILLVDDSETLSKIISFVLESEGYKVIRARNGIEALEKLKEFLPDLIIVDLDMPPMDGYELLKKLKNDEKLRNIPVIVISRNTDPEVEERALELGANAYVPKPFSLQELMEIVKKLLN
1385	MKKILLVDDSETLRKIISFALEKEGYKVIFAPNGIEALKKLEKELPDLIIVDLRMRPMDGFELLKILKNDEELKKIPVVVLSLDRDPEVEKKALEAGADKYIPKPFSIEELIKVIKKLLN
1386	MKSVLVVDDSETLNKIITFALESEGYTVILAPNGIAALEKLKEFLPDLIILDLNMPPMNGLEVLKVLKNDEKLRKVPVIVLSADRDPEVEEKALEAGADAYVPKPFSIQELIEIAKKLLE
1387	MKTILLVDDSETLRKIISFALEKEGYKVVFAKDGIEALEKLKKFLPDLIIVDLSMPKMNGFEFLKILKNDPELKNIPVIVLSKDRTPEVEKKALELGANAYVPKPFSIKELMEIVKKMLN
1388	MKSILVVDDSETLRKIITFALESEGYKVILAPNGIEALEKLKEFLPDLIIVDLRMPPMNGFELLKILKNDEKLKKIPVIVLSGDSSEEVKKKCLELGADKYVPKPFSISELMKIVKELLN
1389	MKSVLLVDDSETLRKVIEFALKSEGYTVVRAPNGIEALEKLKEFLPDLIILDLRMPPMDGYTLLKILKNDPELKKIPVIVLSLDSSPEVKQKALELGANYYIPKPFSIKELMKVVKELLN
1390	MKKILLVDDSETLRKIISFALESEGYKVIFAKNGIEALEKLKEFLPDLIIVDLNMPLMNGFELLKILKEDEKLKKIPVVVLSADRDPEVEEKCLKLGANAYVPKPFSIKELIKIIKELLN
1391	MKTVLLVDDSETLRKIISFALEKEGYKVIYAPDGKEALEKLKEFLPDLIILDLSMPLMNGYEVLKILKEDEKLKKIPVIVLSGDRTPEVEKKALELGADKYVPKPFSIQELLEVAKKLLE
1392	MKSILLVDDSETLSKIISFALESKGYKVILAPDGIKALEELKKQLPDLIICDLSMPPMNGYELLKILKNDEKLKNIPVIVISGNSDPEVEKKCLELGADKYIPKPFSIEELMEVVEEMLN
1393	MKTILLVDDSEVLRKIISFALEKEGYKVIYAKNGKEALEKLKEFKPDLIILDLSMPPMNGFELLKELKEDEELKKIPVIVLSANRDPEVEEKCLKAGANAYIPKPFSIQELMKKVKELLN
1394	MKSVLLVDDSETLSKIISFALESEGYTVVYAPNGIEALEKLEKFTPDLIIVDLNMPKMDGFELLKRLKNDEKLKKVPVIVLSANRDPEVEERALELGADAYVPKPFSIEELMKIVKKLLE
1395	MKSVLLVDDSETLRKIIKFALEKRGYKVTLAPDGKAALEELEKSLPDLIIVDLSMPPMNGLELLKILKNDPKLRKIPVLVVSLDRSPEVEQKCLEAGADAYVPKPFSIEELMKIVEKLLN
1396	MKSILLVDDSKTLRKIISFALEKEGYSVVEAPDGKEALEKLKKFKPDLIIVDLNMPKMNGFELLKILKEDEELKNIPVLVLSKDRDPEVEEKCLELGANAYVPKPFSIKELMEIVKKLLN
1397	MKKVLVVDDSETLRKIITFGLEKEGLKTVLAPNGIEALEKLKKFLPDLIILDLSMPPMNGFEVLKILKEDEKLKNIPVVVISKDRTPEVEKKALELGADAYVPKPFSIEELMEIVKKLLE
1398	MKSVLLVDDSEVLRKVISFGIESEGYTVTLAPNGIEALEKLEKFLPDLIIVDLNMPKMNGYELLKKLKENEELKKIPVVVLSGDESEEVKERALELGADKYVPKPFSIKELMEIIKKLLN
1399	MKSVLVVDDSETLQKVITFALEKEGYKVIRARNGVEALRKLEEFLPDLIIVDLRMPPMDGFELLRRLREDPELREVPVVVLSKDRDPEVKRRALELGADAYVPKPFSIKELMEIVKKLLN
1400	MKSILLVDDSEVLRKIISFALEKEGYTVTFAPDGISALEKLKKFLPDLIIVDLSMPKMNGLELLKILKNDEKLKNIPVIVLSGNRDPEVEEEALKAGANKYVPKPFSIEELMKIVKKLLN
1401	MKSVLLVDDSETLRKIISFALEKEGYTVTYAPDGIEALKKLEKSLPDLIIVDLRMPKMNGYELLKILKENEELKKIPVIVLSADTSEEVKKKALELGANKYVPKPFSISELMEIVKELLE
1402	MKSVLLVDDSETLSKVISFALEKEGYTVVLAPDGIAALEKLKKFLPDLIIVDLRMPKMNGFELLRILKNDEKLREIPVVVLSGDRSPEVEQRALEAGADAYIPKPFSIEELMKVVKKLLE
1403	MKSILLVDDSETLRKIISFAIEKKGYKVIYAKNGIEALEKLKKFLPDLIILDLNMPPMNGYEVLKILKNNEELKKIPVIVLSTNRDEEVKKKALELGANYYIPKPFSISELMEVIEKLLN
1404	MKKVLLVDDSETLRKIIKFALEKEGLEVVEAKNGKEALEKLKEFLPDLIIVDLRMPIMNGFELLKILKNDPELREIPVLVVSLDRSEEVKEKALEAGADAYIPKPFSIKELMEVVKKLLE
1405	MKSVLLVDDSETLSKIISFALEKEGYKVVRAPNGKEALEKLKEFLPDLIIVDLRMPPMNGLELLKILKEDEKLKKIPVVVLSGDRSPEVEKKCLELGADKYIPKPFSIEELMKVVKELLE
1406	MKSILLVDDSETLRKIISFGIESKGYKVIYAKNGVEALEKLEEFLPDLIIVDLNMPPMNGFELLKILKENEELKKIPVIVISRDRTPEVEEKALKLGANAYIPKPFSIKELMEVIEKLLN
1407	MKTILLVDDSETLRKIIKFALESKGYKVIEAKDGKEALEKLKKFLPDLIIVDLRMPKMNGLELLKILKNDEKLKNIPVVVLSADRDPEVEKLCLEAGANKYIPKPFSISELMKVVDELLN
1408	MKKILLVDDSETLRKIITFALEKEGYTVVTAPDGIEALKKLEEFLPDLIIVDLRMPKMNGFELLKILKNDEKLKNIPVVVISADRSPEVEKEALELGADKYVPKPFSIKELMEIVKKLLN
1409	MKSVLLVDDSETLAKVIKFALESEGYSVVLAKNGIEALEKLKEFLPDLIIVDLSMPKMNGLELLKILKEDEKLKKIPVVVLSSDRSPEVKEKCLKLGANAYVPKPFSIEELMKIVKKLLE
1410	MKTVLLVDDSETLRKIISFALEKKGYKVIFAPNGIEALKKLEEFLPDLIIVDLSMPPMNGYELLKKLKNDEKLKKIPVIVLSGNRDPEVEKKCLELGANAYIPKPFSIEELMKVVEKMLN
1411	MKSVLLVDDSETLRKVISFALEKEGYTVIYAKNGKEALEKLKKELPDLIIVDLRMPIMNGFELLEILKNDEKLKKIPVIVLSRDRDPEVEERCLKAGANAYIPKPFSIKELMEVVKKLLN
1412	MKKVLLVDDSETLSKVITFALESRGYSVVRAPDGKEALEKLKEFLPDLIIVDLSMPPMNGFELLKTLKNDPELKKVPVVVLSKDRDPEVEKKCLELGANAYIPKPFSITELMEVVEKLLN
1413	MKSVLLVDDSETLAKVITFALEKEGYTVTLAPNGIEALKKLEKFLPDLIIVDLSMPKMNGFELLKILKNDEKLKKIPVVVLSANRDPEVEEKCLKLGADKYVPKPFSIEELMKIVKELLN
1414	MKSVLLVDDSETERKIISFALEKRGYKVVYAPNGKEALEKLKEFLPDLIILDLDMPLMNGLEVLKILKNDEKLKNIPVIVLSRNRDPEVKKRCLELGANAYIPKPYSIKELMEVVEKLLN
1415	MKKILLVDDSETLRKVISFALKSKGYEVIEAKNGKEALEKLKEFKPDLIILDLRMRPMNGLEVLKILKEDEELKNIPVVVISADRSPEVEERALELGADKYIPKPFSIKELMKVVEELLN
1416	MKTVLLVDDSETLSKIIKFALEKEGYKVVLAKNGIEALKKLEKFLPDLIILDLSMRPMNGYELLKILKENEKLKKIPVIVLSGDRSPEVKERALELGANAYVPKPFSISELMKIAKKMLN
1417	MKSVLLVDDSEVLSKIISFALEKEGYSVIRAPDGKAALEKLKESLPDLIIVDLSMPKMNGLELLEVLKNDEELKNIPVIVLSLDRDPEVEKRCLEAGANAYIPKPFSIEELMEVAKKLLN
1418	MKSVLLVDDSETLAKIITFALESRGLTVTLAKNGIEALEKLKEFTPDLIIVDLDMPPMNGFELLKILKNDEKLKKIPVLVLSRDSTEEVKEKALELGADKYVPKPFSISELMEEVEKLLN
1419	MKTVLLVDDSKTLRKVISFALKSEGYKVIEAPNGVEALEKLKKFLPDLIILDLRMPPMNGFELLKILKNDEKLKNIPVIVLSGDRDPEVEEEALKLGANKYIPKPFSIKELIKVAKELLN
1420	MKKILLVDDSETLRKIISFGLEKEGYSVVFAKDGIEALEKLKEFTPDLIIVDLNMPKMNGFELLKILKNDEKLKKVPVVVLSADTTPEVKKKALEAGADKYVPKPFSIKELMEVVKELLN
1421	MKSVLLVDDSETLRKIISFALESEGLKVVTAPNGKEALEKLEKFLPDLIICDLRMPEMNGLELLKILKNNEKLKKIPVVVLSADRDPEVEEKCLKAGANYYVPKPFSIKELIEIIKKLLN
1422	MKKILLVDDSETLQKIISFALEKKGYSVIYAKNGKEALEKLKEFLPDLIIVDLNMPPMNGFELLKILKNDEKLKKIPVIVLSADRSEEVKKKALEGGADAYIPKPFSIKELMEVAEKLLN
1423	MKSVLLVDDSETLRKIISFALESKGYKVIFAKNGKEALEKLKKSLPDLIILDLRMPPMNGFEVLKILKNDEKLRKIPVIVLSGDRSPEVEERCLKLGANAYIPKPFSIKELIEVAEKLLN
1424	MKSILLVDDSETLSKIISFAIESRGYTVVRAPNGKAALEKLKEFTPDLIIVDLRMPPMDGFELLKILKEDEKLKNIPVVVLSGDSDPEVEQRALEAGANAYVPKPFSIKELMEIIDKLLN
1425	MKKVLVVDDSETMNKVITFALEKEGYSVVLAPDGVEALEKLEEFLPDLIIVDLNMPKMNGYELLKKLKENEELKKIPVIVLSADSSEEVKKRALELGADAYVAKPFSISELMKIAKELLN
1426	MKKVLLVDDSETLRKIISFALEKEGYSVVYAPNGIAALEKLKEFLPDLIIVDLNMPPMNGFELLKILKEDEELKNIPVIVLSKNRDPEVEKEALEAGANAYIPKPFSISELMKVVKKLLN
1427	MKSVLLVDDSETLRKIISFALESKGYSVIFARNGVEALEKLEAFTPDLIIVDLRMPLMDGFELLRRLAADPELRGVPVVVLSLDRSPEVEQRALEAGANAYIPKPFSIKELMEVVEKLLN
1428	MKSILLVDDSETLRKIIKFALESKGYTVVEAPDGKAALEKLKEFLPDLIIVDLSMPLMNGYELLKILKNDEELKKIPVIVLSADSSPEVEEKALKLGANAYVPKPFSIKELMEIVEKLLN
1429	MKSVLLVDDSETLSKVIKFALESKGYTVTLAKNGIEALKKLKEFLPDLIILDLSMPPMDGFTVLKILKNDPKLKKIPVVVLSADRDPEVKQRCLELGANAYIPKPFSIKELIEVVEKLLN
1430	MKSVLLVDDSETLQKIISFALEKKGYTVVLAKNGKEALEKLKEFLPDLIIVDLSMPPMNGYELLKKLKNDEKLKNIPVIVISGNRDPEVKKRALELGADYYIPKPFSIQELIKVAEELLN
1431	MKTVLLVDDSETLRKIISFALESRGYKVIYAPNGKEALEKLKKFKPDLIIVDLRMPPMNGFELLRILKEDEELKNIPVIVLSADRTEEVKERALELGADKYVPKPFSIEELMKIAEELLN
1432	MKSVLLVDDSETMRKIIKFALEKRGYTVIEAPNGKEALEKLKEFLPDLIIVDLSMPPMNGFELLKILKNDEELKKIPVVVLSTDRDPEVEKRCLELGANKYVPKPFSIEELMEIVEELLN
1433	MKSVLLVDDSETLSKIIKFGLEKEGYTVTLAKDGKEALEKLKEFLPDLIIVDLSMPKMNGLELLKILKENEELKKIPVIVISADRSPEVEKKCLELGADAYIPKPFSIKELLEVAKKLLE
1434	MKSVLLVDDSKTLNKIISFALEKEGYSVILAEDGIEALEKLKESLPDLIILDLRMPKMNGLEVLRVLKEDPELREVPVVVLSRDRDPEVEQEALEAGADKYVPKPFSIKELMEVVKELLE
1435	MKTVLLVDDSETLTKIISFALEKEGLKVIKAPNGKEALEKLKEFLPDLIIVDLSMPPMNGFELLKELKEDPKLRKIPVIVVSGDRSPEVEKRALELGADAYVPKPFSIEELMKIVKKLLE
1436	MKSVLLVDDSETMRKIISFAIEKKGYKVIFAPDGIEALEKLKKELPDLIIVDLSMPKMNGFELLKILKNDEKLKKIPVIVLSLNRDPEVEEEALKLGANAYVPKPFSIQELMKIIEKMLN
1437	MKSVLLVDDSETLLKIISFALESRGYKVIRARDGIEALKKLEKSLPDLIIVDLRMPKMNGFELLKILKENEKLKKIPVIVLSGDRSEEVKEKALKLGANKYVPKPFSIEELMKEVEKLLN
1438	MKSILLVDDSETLRKIISFALESEGYTVVLAPNGIEALEKLKEFLPDLIIVDLRMPKMNGYELLKILKNDEKLKEIPVIVISADRDPEVEKKALELGANAYIPKPFSIKELIEVVKKLLN
1439	MKSVLLVDDSETLQKIISFALEKEGLSVVRARNGIEALEKLKKFLPDLIIVDLSMPPMNGFELLKILKEDPELKKIPVVVLSLNRDPEVEKEALELGANAYVPKPFSISELMKIVKELLN
1440	MKSVLLVDDSKTLQKIISFALEKEGYKVILAENGIEALEKLKKSLPDLIIVDLRMRPMNGFELLKILKNDPKLKKIPVIVLSADRSEEVKERALKLGADKYIPKPFSIKELIEEVKKLLN
1441	MKSVLLVDDSKTLRKIIKFALESEGWTVVEAPDGIEALRKLKEFLPDLIIVDLRMPPMDGYELLRVLAEDEELRKIPVIVLSAVRDEEEKERALKLGANKYVPKPFSIKELIKIAKELLN
1442	MKSILLVDDSETLSKIISFGLEKEGYTVTLAKNGKEALEKLKKFLPDLIICDLSMPPMDGFTLLKILKENEKLKNIPVIVLSGNRDPEVEEKALKLGANKYIPKPFSIEELMKVVKKLLE
1443	MKSVLLVDDSETMRKIISFALESEGYTVTFAPDGKAALEKLKEFKPDLIILDLRMPKMNGYEVLKILKEDEELKNIPVIVLSGDRSEEVKKKALELGANAYVPKPFSIKELMEIAKKLLN
1444	MKTVLVVDDSETLRKVITFALEKEGYKVILAPNGIEALKKLEEFLPDLIIVDLNMPPMNGLELLKKLKNDEKLKEIPVLVLSKDRSPETEKKCLEAGANAYVPKPFSIEELMKIVKKLLN
1445	MKSILLVDDSETMRKIISFALEKEGYTVIEAPNGIEALKKLEKFLPDLIIVDLSMPPMNGFELLKILKNDEKLKNIPVVVLSGNRDPEVEEKALELGADKYIPKPFSIQELMKVVKELLN
1446	MKSVLLVDDSKTLNKIISFALKSKGYSVVLAEDGIEALEKLKKFLPDLIIVDLRMPKMNGYELLKILKNDEKLKNIPVVVISKDRSPEVEERALELGANKYIPKPFSIKELMEVVEKLLN
1447	MKKILLVDDSETLSKVISFALEKEGYSVVRAKDGIEALEKLKKFLPDLIIVDLRMPKMNGLELLKILKENEELKKIPVIVLSGDRSPEVEEKALEAGANYYIPKPFSIKELMEVVKKLLN
1448	MKTILLVDDSETLRKIIKFALEKRGYKVIEAPNGKEALEKLKEFLPDLIIVDLNMPPMNGLELLKTLKNDPKLKKIPVIVLSADRSPEVEQLALEAGADAYVPKPFSIEELMEIVEKLLN
1449	MKSVLLVDDSETLRKIISFALESRGYTVTFAKDGIEALKKLEKSLPDLIILDLRMPKMNGYEVLKILKENEELRKIPVVVLSRNRDPEVEERALELGANAYIPKPFSIEELMKVVEKLLN
1450	MKSILLVDDSETLSKIISFALESEGYSVTLAKDGVEALKKLEKFLPDLIIVDLKMPKMNGFELLKILKENEKLKKIPVIVLSGDRTPEVKERALKLGANAYIPKPFSIKELIEVAKKLLN
1451	MKSILLVDDSETLQKIISFALESKGYTVVRAPDGIEALKKLEKFLPDLIIVDLSMPKMNGFELLKILKEDEKLKKIPVIVISADRDPEVEKKALEAGADAYVPKPFSIEELMKIVEKLLN
1452	MKSVLLVDDSETLQKIISFALKSEGYTVTLAKNGKEALEKLKEFTPDLIILDLSMPLMNGFEVLEILKNDEKLKKIPVIVLSANRDPEVEKKCLEKGANKYIPKPFSIEELMKEVKKLLN
1453	MKKILLVDDSETLSKIIKFGLEKEGYEVVLAKDGIEALEKLKEFTPDLIIVDLSMPKMNGFELLKKLKNDEELKNIPVIVLSADRDPEVEKEALEAGADAYVPKPFSISELLKIIKKLLN
1454	MKSVLLVDDSEVLSKVISFALESEGYTVVLAPNGKEALEKLKEFLPDLIIVDLRMPPMDGFTLLKILKEDPELKKIPVVVLSRDRSPEVEERALKLGANAYIPKPFSIKELMEVVKKLLE
1455	MKSVLLVDDSETLRKIIKFALEKKGYTVVEAPNGVAALEKLKKFLPDLIIVDLRMPPMDGYTFLQILKNDEELKKIPVVVISANRDPEVEQKALELGADAYVPKPFSIEELIKIVEKLLN
1456	MKSVLVVDDSETLRKIITFALESEGYTVTLAKDGIEALEKLKEFTPDLIIVDLSMPPMNGFELLKKLKNDEKLKKIPVVVLSLDRDPEVEKKALELGANKYVPKPFSIKELIEIVKELLN
1457	MKTILLVDDSETLRKIISFALESEGYKVIFAPDGKEALEKLKEFLPDLIIVDLRMPPMDGFTLLEILKNDEELKKIPVIVLSADRDPEVEQRCLEAGANAYVPKPFSIKELIEIVKKLLN
1458	MKSVLLVDDSETLSKIISFALESEGLKVVLAPDGIAALEKLKKFLPDLIIVDLSMPKMNGFELLKILKEDEKLKNIPVIVLSGNRDPEVEKKALELGANKYIPKPFSIEELMKVVKELLE
1459	MKSVLLVDDSETLNKIISFALKSKGYSVTLANNGIEALEKLKEFLPDLIILDLSMPKMNGFELLKILKNDEKLKEIPVIVLSADTSEEVKEKALELGANAYIPKPFSIKELMEVVEKMLN
1460	MKSILLVDDSETLQKVISFALEKRGYKVVRAKNGIEALEKLKEFLPDLIIVDLDMPPMNGFELLEILKNDEKLKEIPVVVISRNRDPEVEKRCLEAGADAYVPKPFSIEELMEIVEKLLN
1461	MKTILLVDDSETLRKVISFALEKEGYSVILAPNGKEALEKLKEFLPDLIIVDLRMPPMDGLELLRILKEDEELRKIPVVVLSADRDPEVKEEALEAGADAYIPKPFSIKELMEVVKKLLN
1462	MKTILLVDDSETLRKIISFALESEGYKVITAKNGKEALKKLEEFLPDLIIVDLRMPPMNGLELLKILKNDEKLKKIPVIVLSADRSPEVEKECLEAGANKYVPKPFSIKELMKIVKELLN
1463	MKSVLLVDDSKTLRKIISFALKSEGYEVIEASNGVEALEKLKKFKPDLIIVDLRMPPMNGLELLRILKNDPELRNIPVIVLSGDRSPEVEKEALEAGADAYIPKPFSIKELMKVAKELLN
1464	MKSILLVDDSETLRKIISFALKKEGYSVVEAKDGVEALEKLKEFLPDLIIVDLSMPKMDGRELLRVLREDPELREIPVVVLSGDRDPEVEEEALELGADAYIPKPFSIKELMEVVKKLLE
1465	MKKILLVDDSETLSKIISFALEKEGYTVIRAKDGIEALKKLEKETPDLIIVDLRMPPMNGFELLEILKNDEKLRKIPVVVVSKDRSPEVEEKCLELGADKYVPKPFSIEELIEIIKKLLE
1466	MKKILLVDDSETLRKVISFALKSRGYSVVFAKNGIEALEKLKKFKPDLIILDLSMPPMNGFEVLKILKNDEELKNIPVIVLSADRDEEVKERALKLGADYYIPKPFSIKELMEVVDKLLN
1467	MKSILLVDDSETLRKIISFGLESKGYTVTFAKNGKEALEKLKEFLPDLIIVDLSMPPMNGFEFLKILKNDEKLKNIPVVVLSKDRSPEVEEKCLELGANAYVPKPFSIEELLKIIEKLLN
1468	MKSVLLVDDSETLRKIISFALKKKGYKVVYAKNGKEALEKLEKFLPDLIIVDLSMPPMNGYELLKILKNNEKLKKIPVIVLSLDRDPEVEKKALELGANKYVPKPFSIKELMEVAEKLLN
1469	MKSVLLVDDSEVLRKIISFALEKEGYTVVFAENGIEALEKLKEFLPDLIIVDLSMRPMNGLELLKILKEDEKLKKIPVIVLSADRDPEVEEKALKAGANKYIPKPFSISELMKVAKELLN
1470	MKSILLVDDSETLSKVIKFGLEKKGYKVILAKNGKEALEKLEEFLPDLIIVDLRMPPMNGFELLKRLKNDEELKKIPVVVLSLDSDPEVKKEALELGADAYIPKPFSIKELMEVVEKLLN
1471	MKTVLVVDDSETLTKIITFALEKEGYKVIKAPNGIEALKKLEKFLPDLIIVDLNMPPMNGKELLKILKNNEKLKNIPVIVLSGNRDPEVKEEALKLGANKYIPKPFSIKELIEEVKKLLN
1472	MKSVLLVDDSETLRKIISFALESKGYSVIFAKDGIEALEKLKEFLPDLIIVDLRMPKMNGFELLKILKNDEKLKEIPVIVLSADRDPEVEEKALELGANKYIPKPFSIEELIKVAEELLN
1473	MKSVLLVDDSETLRKIISFGLKSEGYSVIFAPDGIEALKKLEEFLPDLIIVDLSMPKMNGLELLKILKENEELKKIPVVVISGNRDPEVEKECLEAGANAYVPKPFSIEELLEIVKKLLN
1474	MKSVLLVDDSEVLRKIISFGLEKKGYSVIYAPNGIEALEKLKKQRPDLIIVDLRMPPMNGLELLRILAEDEELRKVPVIVLSKDRSPEVEQECLEAGANAYVPKPFSIEELMKIVEKMLN
1475	MKSILLVDDSETLSKIISFALESEGYSVVFAPNGIEALKKLEEFLPDLIIVDLSMPLMDGYTLLKILKNDEKLKKIPVVVISLDRDPEVEKKALELGADKYIPKPFSIEELMKVVKELLE
1476	MKSVLLVDDSKTLRKVISFALESKGYKVIEAPDGIEALKKLEKQLPDLIILDLNMPKMNGLEVLKILKNNPELKKIPVIVLSLDRDPEVEEKALEAGANYYIPKPFSIEELMKVAEKLLN
1477	MKSILLVDDSEVLSKVITFALEKEGYKVTLAKNGKEALEKLEKSLPDLIILDLSMPPMNGYEVLKILKNDEKLKNIPVIVLSANRDPEVEERALELGADAYVPKPFSIEELMEIVKKKLN
1478	MKSVLLVDDSETLSKIITFALESEGWTVTLAPNGKEALEKLKEFLPDLIILDLRMPPMNGLEVLRILKNDEKLKKVPVIVLSGDRSPEVEKRCLEAGANAYVPKPFSIKELIEIAKKLLN
1479	MKSVLLVDDSETLSKIISFGIEKKGYKVVRAKDGVEALKKLKEFLPDLIIVDLNMPKMDGFTLLKILKNDPKLKKIPVIVLSLDRSPEVEKEALEAGANYYVPKPFSIQELMKIIEKLLN
1480	MKSVLLVDDSETLSKIISFALESRGYSVVLAPDGIEALKKLEEFTPDLIIVDLSMPKMNGEELLRILAEDEKLKNIPVLVISRDRSPEVEQRALELGANKYVPKPFSISELMEEVEKLLN
1481	MKSVLVVDDSETLRKIITFALESKGYSVTLAPDGISALEKLKKFLPDLIIVDLSMPKMNGFELLKILKEDEKLRDIPVIVISRDSTPEVEKKALEAGADYYIPKPFSISELMKKIEEMLN
1482	MKSILLVDDSETLRKIITFALESKGYKVVLAKNGKEALEKLKEFLPDLIIVDLRMPPMNGFELLKILKNDPKLKKIPVIVLSLDRDPEVKKKALEAGANAYVPKPFSISELMKIVEKMLN
1483	MKKVLLVDDSETLRKIISFGLKSEGLEVVTAPDGVAALEKLKEFLPDLIIVDLRMPKMDGLTLLEVLKNDPELKKIPVIVLSADTDEEVKERCLKAGADAYVPKPFSISELMEIAKKLLN
1484	MKSILLVDDSETLRKIISFALKSRGYTVTYAPNGIEALEKLKKFLPDLIIVDLSMPPMNGFELLKKLKNDPELKKIPVVVLSADRDEEVKKRALELGADAYIPKPFSIKELMEVIEKLLN
1485	MKSVLLVDDSETLRKIISFALESKGYKVVFAPDGKEALEKLKEFLPDLIIVDLKMPKMNGFELLKILKNNEKLKKIPVIVISADRSPEVEKKALELGANAYIPKPFSISELIKVAEKLLN
1486	MKSILLVDDSEVLQKIIKFGIEKKGYKVIFAPNGKEALKKLEEFLPDLIIVDLNMPLMNGFELLKILKEDEKLKEIPVIVISADRSPEVEEECLKLGANKYIPKPFSIKELMEVIEKLLN
1487	MKKVLLVDDSETLRKIISFAIESRGYKVIYAKNGKEALEKLKEFLPDLIISDLLMPEMNGFELLEILKNDEKLKKIPVIVLSADRSPEVEERCLKAGANAYVPKPFSIEELMKIIEKMLN
1488	MKSILVVDDSETLRKIITFGLESKGYSVTLAPNGIEALEKLKKSLPDLIILDLRMPLMNGFEVLKILKEDEKLKKIPVVVLSRDSDPEVKEKALKAGANAYIEKPFSISELMKVVEKLLN
1489	MKSILVVDDSEVMNKIITFALEKEGYSVTLAKNGIEALKKLEESLPDLIIVDLRMPPMNGYELLKKLKEDEKLKKIPVVVISGDRDPEVEEKALKLGANKYIPKPFSIEELMKVIKELLE
1490	MKTVLLVDDSETLRKIIKFALEKKGYKVIEAPNGKEALEKLKKFTPDLIICDLSMPIMNGLEFLKILKNDPKLKNIPVVVLSLNRDPEVEKECLEAGANYYIPKPFSIKELIKVIEELLN
1491	MKSILLVDDSETLRKIISFALEKEGYKVVYAKNGIEALEKLKKFLPDLIILDLSMPPMNGYEVLKILKNDEKLKNIPVIVLSLDRDEEVKEKALKLGANAYVPKPFSIKELMKIVKELLN
1492	MKKVLLVDDSETLRKIISFALESEGLEVVLAPNGIEALKKLEKFLPDLIICDLRMRPMNGYELLKILKNDPELKNIPVIVISADRDPEVEKRCLELGADKYIPKPFSIKELMKVAKELLN
1493	MKKILLVDDSKTLRKIIKFAIEKKGYKVIEAPNGIEALKKLEKELPDLIIVDLSMPPMNGFELLKILKENEKLKNIPVIVLSRNRDPEVEKECLELGANKYVPKPFSIEELMKIIEKLLN
1494	MKKVLLVDDSEVMNKIISFALESKGYSVVLAPNGKKALEELKKFLPDLIIVDLRMPPMNGFELLKILKNDPELKKIPVIVLSGDRSEEVKKECLELGADYYIPKPFSIEELMEVAEKLLN
1495	MKTILLVDDSKTLRKIIKFALESKGYKVVEAPNGKEALEKLKEFLPDLIIVDLNMPPMNGFELLKILKEDEKLKKIPVVVLSLDRSPEVEKKALEAGADAYVPKPFSISELMKIVEKLLN
1496	MKTILLVDDSETLRKIISFALEKEGYKVILAKNGIEALEKLKEFLPDLIIVDLSMPPMNGFELLKRLKEDEKLKKIPVIVLSLDSSPEVKEKALKAGADKYVEKPFSIKELMEIVKKMLN
1497	MKSVLLVDDSETLRKIIKFALESEGYSVIEAPNGKEALEKLKEFLPDLIIVDLNMPPMNGFELLKILKEDEKLKKIPVIVLSLDSSEEVKKKALELGANKYIPKPFSIEELLKVVKELLE
1498	MKSILLVDDSETLRKIIKFALESEGYTVIEAKNGVEALEKLKKSLPDLIIVDLNMPPMNGFELLKILKNDEKLKNIPVIVISLDRDPEVEKEALELGANKYIPKPFSISELMKVAKKLLN
1499	MKTVLLVDDSETMRKIISFALKSKGYKVIYAPNGKEALEKLKEFLPDLIIVDLSMPPMNGYALLEKLKNDPELKKIPVIVLSGNRDPEVEKRALELGADAYIPKPFSISELLEVAEKLLN
1500	MKSVLLVDDSETLRKIISFALESRGYKVVEAPDGKAALEKLKEFTPDLIIVDLSMRPMNGFELLRILSENEELRKVPVVVLSLDRDPEVEQRCLEAGADAYVPKPFSIEELMEIVEKLLN
1501	MKTVLLVDDSETLRKIITFAIEKKGYKVILAPNGKEALEKLKKFLPDLIIVDLSMPPMNGFELLKILKNDEKLKKIPVIVLSADRDPEVEKKALEAGANYYIPKPFSIEELMKVIEKLLN
1502	MKSVLLVDDSETLAKIISFALESKGYTVTLAPDGRAALEKLEEFLPDLIILDLRMPPMNGLELLRRLAEDEKLRKVPVVVLSGDSSEEVKQEALEAGASAYIEKPFSIEELIKVVEKLLS
1503	MKSVLLVDDSETLRKIISFALEKEGYKVVFAPNGIEALKKLEEFLPDLIIVDLSMPPMNGLELLKKLKNNEELKKIPVIVLSLNRDPEVEKECLEAGADAYVPKPFSIQELMEIAKKLLN
1504	MKSVLLVDDSETLNKVISFALKSEGYSVILAKNGIEALKKLEKELPDLIIVDLNMPPMNGLELLKILKNNEKLKNIPVIVISGDRSPEVEKKALEAGANAYVPKPFSIKELMEIAKKLLN
1505	MKTILLVDDSETLRKIISFALESKGYKVILAPDGIAALEKLKKFLPDLIIVDLRMPKMNGLELLKILAENEELKKIPVVVLSGDRDPEVEKRCLEAGANAYVPKPFSIEELMKIIEKLLN
1506	MKSVLLVDDSETLRKIISFALESEGLKVILAPNGIEALEKLKKFTPDLIICDLSMPPMNGLELLKILKNDEKLKKIPVVVLSGNRDPEVEELCLKAGADKYIPKPFSITELMEVVKKLLN
1507	MKSVLLVDDSETLSKIISFALESEGLKVTLAKDGIEALEKLKKFLPDLIILDLNMPKMNGLEVLRILKEDEELKKIPVLVLSADRSPEVEKEALEAGADAYVPKPFSISELMEIVKKLLN
1508	MKTILLVDDSETLSKIISFALEKEGYKVILAKNGVEALKKLEEFLPDLIIVDLRMPPMNGLELLKILKNNEKLKNIPVVVLSGDRDPEVEEEALKAGADKYIPKPFSIEELIKVIKELLN
1509	MKKILLVDDSETLRKIISFALEKKGYKVILAENGIEALKKLEKELPDLIIVDLRMPPMNGFELLKILKENEKLKKIPVVVLSKDRDPEVEKKALEAGANKYIPKPFSIEELMKVVEELLN
1510	MKTVLVVDDSETLRKIITFALEKEGYKVILAPNGKEALEKLKKQLPDLIIVDLNMPPMNGLELLKILKENEKLKNIPVIVLSRDRSPEVKEKCLEAGANKYIPKPFSIKELIEEAKKLLN
1511	MKKILLVDDSETLRKIISFALEKEGYEVVYAPNGIEALKKLEKFLPDLIIVDLNMPPMNGFELLKILKNDEKLREIPVIVLSLDRSEEVKERALELGADAYVPKPFSIKELMEIVKKMLN
1512	MKSVLLVDDSETLQKIISFALESEGLSVVRAKNGKEALEKLKKFLPDLIIVDLRMPPMDGFELLKILKEDEELKKIPVIVLSGDRDPEVKKKCLELGANAYIPKPFSIEELMKVVKKLLE
1513	MKSVLVVDDSETLRKVITFALEKEGYSVVLAKNGIEALKKLEEFLPDLIIVDLRMPPMNGLELLKILKNNEELKNIPVIVLSGDRDPEVEKKCLEAGANAYIPKPFSIEELMKVVKELLN
1514	MKSILLVDDSEVLSKIISFALKKRGYTVTLARNGKEALEKLKKELPDLIIVDLSMPPMNGFELLEILKNDPELRKIPVIVLSGDRDPEVEERCLKAGANAYIPKPFSIEELMKEVEKLLN
1515	MKSILLVDDSETLRKVISFALESEGYKVIFAKDGKEALEKLKEFTPDLIIVDLNMPPMNGFELLKILKEDEKLKNIPVIVLSSNSDPEVEKKCLELGANKYIPKPFSIEELIKVAKELLN
1516	MKSVLVVDDSETLTKIITFALESEGYTVVKAPNGKEALEKLKEFLPDLIIVDLSMPLMNGFELLKILKEDEKLKNIPVIVLSADRSPEVKKKALELGANAYIPKPFSIKELLEVAKKLLN
1517	MKKILLVDDSETLQKIISFALEKKGYEVVRAPNGKEALEKLKEFIPDLIIVDLDMPPMNGFELLKILKNDPELRNIPVIVLSKNRDPEVEEKALEAGANYYIPKPFSIEELMKVVEKLLN
1518	MKSVLVVDDSETLNKVITFALESKGYTVVLAPDGVEALEKLKEFLPDLIIVDLSMPKMNGFELLKKLKEDEKLKEIPVVVLSTDRTPEVEQKALELGANKYIPKPFSIQELMEVVDELLN
1519	MKSILLVDDSETLRKIISFALEKRGYKVIYAPDGVEALKKLEKFLPDLIIVDLSMPKMNGFELLKILKNNEKLKKIPVVVLSLNRDPEVEERALKAGADAYIPKPFSIEELMEVVEKLLN
1520	MKSVLLVDDSETMRKIISFALESEGYSVVFAPNGKEALEKLKKFLPDLIICDLSMPPMNGFELLKILKNDEKLKKIPVIVLSTDRDPEVEEKCLKAGANAYIPKPFSIKELIEVAKKMLE
1521	MKKVLLVDDSETMRKIISFALKSKGYSVVLARNGIEALRKLEEFLPDLIIVDLRMPPMNGFELLKKLKEDEELKKIPVVVLSGDRSPEVEEEALKLGADKYIPKPFSIEELMKVVEKLLN
1522	MKKILLVDDSETLSKIIKFAIESKGYEVVLAKNGKEALEKLKEFLPDLIICDLSMPPMNGFELLKKLKEDEELKKIPVVVLSRNRDPEVKQKCLELGADKYVPKPFSIEELMKIIEELLN
1523	MKTVLLVDDSETLRKIISFALESRGYKVILAPNGIAALEKLKEFLPDLIIVDLSMPPMNGFELLEILAKDEKLRNIPVVVLSGDRDPEVEKRALEAGANAYIPKPFSIKELMEVVEKLLN
1524	MKTILLVDDSETLRKIISFALKSEGYEVIFAKDGIEALEKLEKFLPDLIIVDLRMPKMNGYELLKILKNDPKLREIPVVVLSADRDPEVEKRCLELGANAYIPKPFSIKELIEVVKKLLE
1525	MKSVLLVDDSETLNKIISFALEKEGYTVIRAPNGKEALEKLKEFIPDLIILDLSMPIMDGFTVLKILKNDEKLKEVPVIVLSKNRDPEVEEKALKAGANAYIPKPFSIEELMKVVKKMLE
1526	MKSVLLVDDSETMRKIISFGLEKKGYTVVYAPNGKEALEKLKEFLPDLIIVDLSMPPMNGFELLKILKEDEELKKIPVVVLSLDRDPEVEKEALELGADKYVPKPFSIEELMKIVEELLN
1527	MKKILLVDDSETLRKVISFALESEGYSVVFAPNGIEALKKLEKFLPDLIIVDLSMPPMNGLELLKILKNDEKLKKIPVIVLSGDRSPEVEKKCLEAGADYYVPKPFSISELIEIVKKLLE
1528	MKKVLLVDDSETLRKIISFALEKKGYEVIYAKNGKEALKKLEKFLPDLIIVDLRMPPMNGLELLKKLKEDEKLKKIPVIVISRDRSPEVEEKCLEAGANKYVPKPFSIEELMKIAEELLN
1529	MKKVLLVDDSETLRKIIKFALEKEGLEVIEAKNGKEALEKLKKELPDLIIVDLSMPPMNGFELLKILKNDEKLKKIPVVVLSKDRSPEVEKKALELGANKYIPKPFSIEELMKVVKELLN
1530	MKSVLLVDDSEVLRKVISFALEKKGYKVTLAEDGIEALKKLEKFLPDLIIVDLSMPKMNGFELLKKLKEDEKLKKIPVVVLSSNRDPEVEEEALKLGANKYIPKPFSIKELIEVVEKLLN
1531	MKTILLVDDSETLRKVISFALESEGYKVIYAKDGVEALEKLKEFLPDLIIVDLRMPKMNGFELLKVLKNDEELKKIPVIVLSGNRDPEVEKKCLELGADKYIPKPFSIKELMEVVKKLLN
1532	MKSVLLVDDSETLRKIISFALEKEGYSVVFAPNGKEALEKLKEFLPDLIILDLSMPPMNGYEVLKILKNDEKLKKIPVIVLSLNTDPEVKKKALELGANAYIPKPFSIKELMEVAKKLLN
1533	MKSVLLVDDSETLRKIISFALESEGYTVVFAPNGIEALKKLEEFLPDLIIVDLDMPPMNGLELLKTLANDEKLKEVPVIVLSKDRSPEVEEEALKAGAKAYVPKPFSIKELIEIAKKLLN
1534	MKSILLVDDSETMTKIITFALKKEGYSVITAKNGKEALEKLKEFTPDLIIVDLRMPPMNGLELLKTLKEDEELKNIPVIVVSGDRDPEVEKKALEAGANAYIPKPFSIEELMKKVKELLN
1535	MKSVLLVDDSETLRKIISFALESKGYSVIYAPNGIEALEKLKKFLPDLIIVDLSMRPMDGLELLKRLREDPELKKIPVIVLSADRSPEVEERALEAGADAYIPKPFSISELMKVAEKLLN
1536	MKSVLLVDDSETLRKIISFALEKEGYSVIYAPNGIEALKKLKEQLPDLIIVDLSMPPMNGYELLKTLKEDEELKNIPVIVLSLNRDPEVEQRALELGADEYIPKPFSIKELMEVVKKKLN
1537	MKSVLLVDDSETLRKIISFALEKEGYTVVFAPNGKAALEKLKEFLPDLIIVDLSMPPMNGFELLRILKEDEKLREVPVVVLSGDRSEEVKQRALELGANAYVPKPFSIKELIEIVKKLLE
1538	MKKVLLVDDSETLQKIISFALEKEGYSVVRAPNGKEALKKLEEFLPDLIIVDLNMPPMNGYELLKILKENEELKKIPVIVLSADRDPEVEERALELGADKYIPKPFSIKELMEEVKKLLN
1539	MKSVLLIDDSETLSKIIKFALESEGYTVKLAPNGKEALEKLKEFLPDLIILDLSMRPMNGFEVLKILKNDEELKKIPVVVLSADRTPEVEEKALKLGADKYIPKPFSIKELMKVVKELLE
1540	MKKILLVDDSETLNKIITFGLKSEGYEVILAKDGIEALEKLKEFIPDLIIVDLRMPKMNGLELLKILKNDPELKKIPVIVLSGDRDPEVEKKCLEAGANAYIPKPFSIKELMEVVKKLLN
1541	MKSVLLVDDSETLRKIISFALKSRGYTVIYAPNGIEALEKLEKFLPDLIIVDLSMPPMNGFELLKKLKEDEKLRKIPVVVLSGDRDPEVEERCLELGANKYIPKPFSIEELMKVVEELLN
1542	MKSVLLVDDSETLRKIISFALESRGYTVTLAPNGIEALKELEKRLPDLIISDLRMPPMNGLELLKILKEDPERRKIPVIVISGDRSPEVEKRCLELGADAYIPKPFSIKELMEVAEKLLN
1543	MKTILLVDDSETLRKVISFALESRGYKVVFAPNGIEALEKLKKFLPDLIILDLSMPPMNGLELLKILKEDEKLKEIPVIVLSTNRDPEVEKEALEAGANAYVPKPFSIEELMEIVEKLLN
1544	MKSVLLVDDSETMRKIISFALESRGYTVIYAKNGREALEKLEKETPDLIIVDLRMRPMNGFELLKKLKEDEKLKNIPVVVVSGDRTPEVEKEALELGADAYIPKPFSIEELMKVIEKLLN
1545	MKSVLVVDDSETLSKIITFALESKGYTVVLAPNGKEALEKLKEFLPDLIIVDLSMPIMNGKELLKILKNDPKLKKIPVIVLSADRDPEVEKEALELGANKYVPKPFSISELLEEVEKLLN
1546	MKSVLLVDDSETLRKIISFALESEGYSVVFAPDGVEALEKLKEFLPDLIICDLSMPKMNGFELLKILKNDPELKKIPVIVLSKNRDPEVKEKCLKAGADKYIPKPFSIKELIEVAKKLLN
1547	MKSVLLVDDSETLSKIISFALESKGYSVVRAKNGIEALKKLEKFLPDLIIVDLRMPPMNGFELLKILKEDPELKKIPVIVLSGDRDPEVEEEALKLGADKYIPKPFSISELMEEVEKLLN
1548	MKTILLVDDSEVLSKVIKFALEKEGYKVVLAKNGIEALEKLKKFTPDLIIVDLSMPPMNGLEFLKILKNDEELKKIPVIVLSLDRDPETEKKCLEAGANKYVPKPFSIEELMKIVKELLN
1549	MKSVLLVDDSETLSKIIKFALEKEGYSVVLAPNGIEALEKLKEFLPDLIIVDLRMPPMNGLEFLRKLKEDEELKKIPVIVLSGDRSEEVKEECLEAGANAYIPKPFSIKELMKKAKELLN
1550	MKKVLLVDDSETLSKVITFALEKRGYKVVLAKNGIEALKKLEEFLPDLIIVDLSMPPMNGFELLKILKNNEKLKKIPVIVISGDRDPEVEEKCLKLGANYYIPKPFSIKELMEVADKLLN
1551	MKSILLVDDSETLRKIISFALKKEGYEVVYAKNGKEALEKLKKFLPDLIIVDLSMPIMNGYELLKILKNDEKLKKIPVIVLSANRDEEVKKKALELGANAYVPKPFSIKELMEIVKKLLN
1552	MKSVLLVDDSETLNKVITFALEKEGYTVTLAKDGVEALKKLEEFLPDLIIVDLRMPKMDGFTLLETLKNDPELRKIPVIVLSADRDPEVEKKALEAGADAYIPKPFSIKELMEVAKKLLN
1553	MKSILLVDDSETLSKVISFALEKEGYTVIYAPNGIEALEKLKEFLPDLIIVDLRMPPMNGFELLKILKNDEKLKNIPVIVLSRDRTPEVEKRALELGANAYVPKPFSIEELMEIVKKLLN
1554	MKTVLLVDDSETLNKIITFALEKEGLKVILAKNGVEALKKLEEFLPDLIIVDLRMPPMDGLELLRRLKEDPELRKIPVVVLSLDRDPEVEQRCLEAGADAYVPKPFSIKELMEIVKKLLN
1555	MKSILLVDDSETLSKIIKFALEKEGYTVTLAKNGKEALEKLKEFLPDLIIVDLSMPPMNGYELLKILKENEELKKIPVIVLSRNRDPEVEKRCLELGANYYIPKPFSIKELMEVVKKLLN
1556	MKSILLVDDSETLRKIISFALESRGYTVTYAPNGVEALRKLEEFLPDLIIVDLSMPPMNGFELLRRLAEDPALRKVPVVVLSKDRDPEVEERALAAGADAYVPKPFSISELMEIVDELLN
1557	MKTILLVDDSETMRKIISFALESKGYKVIYAPNGVKALEELKKFLPDLIIVDLRMPPMNGFELLKVLKENPELKKIPVIVLSGDRDPEVEERCLKLGANKYVPKPFSIKELIEIVEKLLN
1558	MKSVLLVDDSETLNKIISFAIEKKGYKVVLAPNGKEALEKLKEFLPDLIIVDLSMPPMNGFELLKILKNNEELKKIPVIVLSADSSEEVKEKALELGANKYIPKPFSIKELMEVIEKLLN
1559	MKKVLLVDDSETLNKIIKFALESKGYSVVLAPNGKEALEKLKKFLPDLIIVDLSMPPMNGYELLEILKNDEKLKEIPVIVLSLDRDPEVKERALKLGANAYIPKPFSIKELIEVVEKLLN
1560	MKSVLLVDDSETLSKIIKFALEKEGLTVIEAPNGIEALEKLKEFLPDLIILDLSMRPMNGYELLRILKEDPELRKIPVIVISKDRSPEVEERALELGANKYIPKPFSIEELMKVVKELLE
1561	MKSVLLVDDSETLRKIISFGLESEGYKVIYAPNGIEALKKLEKQKPDLIIVDLSMPPMNGLELLKKLKEDEELKNIPVIVLSLDRDPEVEKRCLEAGANAYIPKPFSMKELLEVAKKLLE
1562	MKSILLVDDSETMQKIISFALEKEGYKVVFAPNGKEALEKLKEFLPDLIILDLSMRPMNGLEVLRILKEDPELKEIPVLVLSGDSSPEVEKRALEAGASAYIPKPFSIEELIKVVKELLE
1563	MKKVLLVDDSETLRKIISFALESEGYEVVFAPNGKEALEKLEKFLPDLIIVDLRMPPMNGYELLKILKNDEELREIPVVVISGDRTPEVEERALELGADKYVPKPFSIKELMEIVKKLLE
1564	MKSVLLVDDSETLSKIIKFALEKKGYTVTLANDGVEALKKLEEFLPDLIIVDLDMPKMNGLELLKVLKENEELKKIPVIVLSRNRDPEVEKEALEAGADAYVPKPFSIEELMKIAEKLLN
1565	MKSVLLVDDSETLSKVISFALESEGYSVVRAKDGVEALKKLEEFLPDLIIVDLRMPKMDGLELLKRLKEDEELRKIPVIVISGDSTPEVKEKALEAGANAYIEKPFSIEELIKTAKKLLE
1566	MKSILLVDDSETLRKIISFALESEGYTVTYAPNGKEALEKLEKFLPDLIIVDLNMPPMNGFEFLKILKNDEKLKKIPVVVVSRDRSPEVKKKALELGADKYVPKPFSIKELIEVIKKLLN
1567	MKTILLVDDSEVLRKIISFALESEGYKVVFAKNGKEALEKLEKFLPDLIIVDLNMPPMNGLELLKILKNDEKLKKIPVVVLSLDRTPEVEEKCLKLGANKYVPKPFSIKELIKIVKELLN
1568	MKTVLLVDDSETLRKIISFALEKRGLKVIFAENGIEALEKLKEFLPDLIIVDLRMPKMNGFELLKILKEDEKLKKIPVIVISKDRDPEVEKKCLELGADKYIPKPFSISELMEVVEKLLN
1569	MKKILVVDDSETLRKIITFALEKEGYKVVLARNGKEALEKLKEFLPDLIIVDLRMPLMNGFELLEILKNDEELKKIPVIVISGDRSPEVEEKCLKAGANKYIPKPFSISELMEVVKKLLN
1570	MKSVLLVDDSETLRKIISFALESEGYTVTFAPNGKEALEKLKEFLPDLIILDLRMPPMNGLELLKILKEDPELKKIPVVVLSRDRSPEVEERCLKAGADYYIPKPFSIKELMEVVKKLLN
1571	MKKILLVDDSETLRKIITFALEKEGYKVVTAPNGIEALEKLKEFLPDLIIVDLNMRPMNGFELLEILKNDEELKKIPVVVISADRDPEVEERCLKAGADKYVPKPFSIEELMKIVKELLE
1572	MKTVLVVDDSETLRKVITFAIEKEGYKVILAKNGKEALEKLKKFLPDLIILDLSMPPMNGYEFLKILKEDEELKKIPVIVLSADTSEEVKEKCLELGANAYVPKPFSIEELMKIAKKLLN
1573	MKTVLLVDDSETMRKIITFSIEKEGYKVVEAKDGKEALEKLEKFKPDLIIVDLRMPPMNGYELLKKLKNDEELKKIPVIVLSGDRDPEVEEKCLKLGANKYIPKPFSIKELMEVIKKLLN
1574	MKSVLLVDDSETLRKIIKFALESEGYKVIEAKNGKEALEKLKEFLPDLIIVDLSMPIMNGFELLKILKENEELKKIPVIVLSLDRDPEVKEECLKGGANKYIPKPFSIEELIEVAKKMLN
1575	MKKVLLVDDSETLRKIIKFSIEKKGYSVIEAKNGKEALKKLEKELPDLIIVDLSMPPMNGLELLKILKENEELKKIPVIVLSGDRSPEVERKCLELGANKYIPKPFSIKELMKVIEELLN
1576	MKKVLLVDDSETMRKIISFALKKRGYEVVFAKDGVEALKKLEEFLPDLIIVDLSMPKMDGFELLKRLKEDPELRKIPVIVLSGDRDPEVEKRCLELGANAYIPKPFSIEKLMEEVEKLLN
1577	MKKVLLVDDSEVLRKIISFALKSEGYEVILAPNGIEALKKLEEFLPDLIIVDLSMPKMNGYELLKILKEDEKLKKIPVIVLSLDRSPETEERCLKLGANKYIPKPFSIKELIEVVKKLLN
1578	MKSVLLVDDSETLRKIISFVLEKEGYKVIYAKNGKEALEKLKEFLPDLIILDLSMPPMNGLEVLKKLKEDEELKKIPVIVLSANRDPEVKKKALEAGANAYIPKPFSPEELMKVAKKLLN
1579	MKSVLLVDDSETLTKIITFALESEGYTVITAPDGISALEKLKESLPDLIILDLSMPPMNGLELLEILKNNEELKKIPVIVLSLDRSPEVEKKCLEAGANKYIPKPFSIKELIKVAKELLN
1580	MKSVLLVDDSETLSKIISFALESKGYSVVRAPNGIEALEKLKEFLPDLIIVDLRMPPMNGFELLKILKNNEELKKIPVLVLSGDRDPEVEKKCLELGANAYIPKPFSISELIEVCEKLLN
1581	MKSILLVDDSETLRKIISFALESRGYKVIYAKNGIEALEKLKEFKPDLIIVDLNMPPMNGYELLKILKEDEELKEIPVVVLSADRTPEVEERALELGANAYVPKPFSITELMEIVEKLLN
1582	MKSILLVDDSETLRKIISFALESEGYTVVYAPNGIEALEKLEKFLPDLIIVDLSMPPMDGFELLKKLKENEELKKIPVVVLSADRDPEVKEKALELGANKYIPKPFSIKELMKVVKELLN
1583	MKTILVVDDSETLRKIITFALESEGYKVILAPNGKEALEKLKKFLPDLIIVDLRMPPMNGFELLKILKEDEKLKKIPVIVLSADRDPEVKEKALKLGANAYVPKPFSIKELMEIVKKMLE
1584	MKSVLVVDDSETLNKIITFALEKKGYSVVLAPDGKEALEKLKEFLPDLIIVDLSMPKMNGLELLKILKEDEELKKIPVIVLSGNRDPEVEKECLELGADKYIPKPFSIEELMKEVEKLLN
1585	MKSILLVDDSETLSKIISFGLESEGYSVTLAPDGKKALEELEKKLPDLIILDLDMPPMNGKEVLKILKNNEKLKEIPVVVLSRNRDPEVEKEALELGADKYIPKPFSIKELLKVIKELLN
1586	MKKILLVDDSETLRKIISFALESEGYSVVFAPNGKEALEKLKEFLPDLIILDLRMPPMNGLELLRILKEDEKLRKIPVIVLSADRDPEVEKECLEAGADAYIPKPFSIKELMEVVKKLLE
1587	MKTILLVDDSETLRKIISFAIEKEGYSVVFAPNGKEALEKLKKFLPDLIIVDLSMPPMNGYELLKILKEDEKLKKIPVVVISADRSPEVEKKALELGANKYVPKPFSIKELMEIIKELLE
1588	MKSVLLVDDSETLRKIITFALEKEGWKVVEAKDGKEALEKLKEFLPDLIIVDLRMPKMNGFELLKKLKEDEKLREIPVIVLSRDRSPEVEQKALEAGANAYVPKPFSIEELIKIAKELLN
1589	MKSILLVDDSETLAKIISFILKSEGYTVIFAKNGKEALEKLKEFLPDLIIVDLSMPPMNGFELLKILKNNPELKNIPVIVLSGNRDPEVKEKALKLGANAYVPKPFSPKELMEIVKKLLN
1590	MKSVLLVDDSETLRKIISFALEKKGYKVVYAPNGIEALKKLEEFLPDLIILDLSMPPMNGYELLKILKNNEKLKKIPVIVISKDRSPEVEEKCLKLGANKYVPKPFSISELIEIVEKLLN
1591	MKSVLLVDDSETLRKIISFALESKGYKVVFAKNGKEALEKLKEFLPDLIIVDLSMPLMNGKELLKILKEDEKLKKIPVVVISADRDPEVEEEALKLGANKYVPKPFSIKELIEIVEKLLN
1592	MKSVLLVDDSETLRKIISFALEKEGLKVVFAPNGIAALEKLKKFLPDLIIVDLRMPPMNGFELLKILKEDPELKNIPVIVLSLDRSPEVKEEALKLGANKYVPKPFSIEELMEVAKELLN
1593	MKTVLLVDDSETLRKIISFALESEGYKVIFAPDGVEALKKLEKFLPDLIILDLRMPKMDGFTVLEILKNNEELKKIPVVVLSKDRDPEVKKRALELGADKYIPKPFSIKELMEVVKKLLN
1594	MKTVLVVDDSETLRKIITFALEKEGYKVILAPNGIEALEKLEKFLPDLIIVDLRMRPMNGLELLEILKNDEKLKNIPVVVLSLDRDPEVEQRCLEAGADAYVPKPFSIKELIEIVKKLLN
1595	MKKVLVVDDSETLNKIITFALESKGYSVILAPNGIEALKKLEKFLPDLIIVDLNMPPMNGFELLKKLKEDEKLKKIPVIVISRDRSPEVEEKALELGANKYVPKPFSIEELMKIVEELLN
1596	MKSVLLVDDSETLQKIISFALEKEGYSVVRAPNGIEALEKLKEFLPDLIIVDLSMRPMNGFELLKILKENEELKKIPVIVLSLDRDPEVEKRCLELGADKYIPKPFSIKELIEVAKKLLE
1597	MKSILLVDDSETMRKIISFALESKGYSVVLAPNGKEALKKLEEFLPDLIIVDLNMPPMNGLELLKILKENEELKNIPVVVLSADRDPEVEKKALEAGANAYVPKPFSISELMEIVEKLLN
1598	MKSVLVVDDSETLRKIITFVLESKGYKVVLAPNGKEALEKLEEFLPDLIIVDLSMRPMNGFELLEILKNDPELRKIPVIVLSLNRDEEVKQKALEAGADAYVPKPFSLEELMKIAEKLLN
1599	MKKILLVDDSETLAKVIKFALESKGYEVVLAKDGVEALEKLKEFLPDLIIVDLRMPKMDGFTLLEKLKNDEKLKNIPVVVISLDRDPEVEKKALEGGADKYVPKPFSIEELMKIVEELLN
1600	MKSILVVDDSETLNKIITFALESEGYSVVLAPNGVEALEKLEKFLPDLIIVDLSMPPMNGFELLKRLKNDPKLKKIPVIVLSADTTPEVKEKALKAGANAYIPKPFSIKELMEVVKKLLN
1601	MKTVLLVDDSETLAKVITFAIEKRGYKVVLAPNGKAALEKLKEFLPDLIILDLSMPPMNGFELLKILKNDEELKKIPVVVLSADRSPEVEEKCLKGGANKYVPKPFSIEELMEIIEKLLN
1602	MKSVLLVDDSKTLRKVIKFALESEGLSVVEAEDGIEALEKLKKFLPDLIIVDLRMPKMNGLELLKTLKNDEKLKNIPVIVISLDRDPEVEKECLEAGANAYIPKPFSIKELMEVAKKLLE
1603	MKSVLLVDDSETLRKIISFALESKGYTVTYAPNGIEALKKLEKFKPDLIIVDLSMPPMNGLELLKKLKEDPELKDIPVIVISGDRDPEMEQKALEAGANKYIPKPFSIEELMKVAEELLN
1604	MKTVLVVDDSETLRKVITFALESEGYKVITAPNGVEALKKLEEFLPDLIILDLRMPPMNGYELLKILKENEELKKIPVLVISGDRDPEVEERALELGADAYIPKPFSIKELMEVVKKLLE
1605	MKKILLVDDSETLRKIISFALEKEGYEVIYAKNGKEALEKLKEFTPDLIILDLSMPPMNGKEILKILKNDEKLKNIPVIVLSLNRDPEVEKEALELGADKYIPKPFSIEELIKVAKKLLN
1606	MKKVLVVDDSKTLRKVITFALEKEGYEVVLAEDGIEALKKLKEFLPDLIICDLLMPKMNGFELLKILKNDEKLKEIPVIVLSGNRDPEVEKEALELGANKYVPKPFSIKELMEIVKKMLE
1607	MKSVLLVDDSETLRKIISFAIESKGYTVTLAKDGVEALEKLKEFLPDLIIVDLRMPKMNGFELLKILKEDEELKNIPVIVISGDRSPEVEKECLELGANYYVPKPFSISELMEIVEKLLN
1608	MKSVLLVDDSEVLRKVISFALKKEGYTVVYAPNGIEALEKLKKFLPDLIIVDLRMRPMNGFELLKILAEDEELKNIPVVVLSGDRDPEVEEEALKLGANKYIPKPFSIQELMEVVKKLLN
1609	MKKVLLVDDSKTLRKIISFALKSEGLEVIEAPNGKEALKKLEKELPDLIIVDLSMPLMNGFELLKILKNNEELKNIPVIVLSLDRDPEVEEKCLKLGANAYVPKPFSIKELMEIVKKLLN
1610	MKSILLVDDSKTLRKVITFALESRGYTVVEAPDGIEALEKLKEFTPDLIICDLSMPKMNGFELLKILKNNEELKKIPVIVISKDRSPEVKERCLKLGANKYVPKPFSIEELMKIVDELLN
1611	MKTVLLVDDSETLRKIITFALEKEGYSVIEAPNGKEALEKLKEFLPDLIIVDLDMPPMNGLELLKILKNDEELKKIPVIVLSRNRDPEVKKKCLEAGADAYIPKPFSIKELLEVAKKLLN
1612	MKKVLVVDDSETMRKIITFALEKEGYEVVLAKDGVEALEKLKKFLPDLIILDLSMPPMNGFELLKILKEDEKLKKIPVIVLSADRSEEVKERALELGADKYIPKPFSIEELMKVVKELLN
1613	MKSVLVVDDSETMRKVITFALEKEGYSVTLAPNGKEALEKLKKFLPDLIIVDLSMPPMNGLELLKILKEDPELKKIPVIVLSADRSPEVEEECLKLGADKYVPKPFSIQELIEEVKKLLN
1614	MKKVLLVDDSEVLRKIISFALESEGLEVVLAPNGKEALEKLKEFLPDLIIVDLRMRPMNGFELLKILKEDEELKKIPVVVLSRDRSPEVEKECLELGADAYIPKPFSIEKLMEVVKELLE
1615	MKSILLVDDSETLRKIISFALEKEGYTVTYAKNGIEALKKLEKFLPDLIIVDLRMPLMDGFELLKILKNNEKLKNIPVVVLSADRDPEVEEEALKLGANKYVPKPFSIEELIKIVKELLE
1616	MKSVLLVDDSETLAKIIKFALESEGLTVTFAKDGIEALKKLEKFLPDLIIVDLRMPKMNGLELLKILKNDPKLKEIPVLVVSGNRDPEVEKEALEAGANAYIPKPFSISELMEVIKKLLE
1617	MKSILLVDDSETLRKIISFALKSKGYTVTYAKNGKEALEKLKKELPDLIIVDLSMPIMNGYELLKILKNDEELKNIPVVVLSGNRDPEVEERALKLGANKYIPKPFSIKELMEVVEKLLN
1618	MKKVLLVDDSETLRKIISFALEKKGYKVIYAPNGIEALKELEKFLPDLIIVDLRMRPMDGFELLKILKEDEELKKIPVIVLSLDRSPEVEKEALEAGANAYVPKPFSIEELMEIAEKMLN
1619	MKSVLLVDDSETLRKVIKFALESEGWTVVEAKNGKEALEKLKEFLPDLIIVDLSMPPMNGLELLKILKNDEKLKEIPVIVLSGNRDPEVEEEALKAGADAYVPKPFSIKELIEIAKKLLE
1620	MKKVLLVDDSETLAKIISFAIESKGYSVVLAPNGKEALKKLEEFLPDLIIVDLSMPPMNGYELLEKLKNDEKLKEIPVIVLSANRDPEVEKKALELGADKYIPKPFSIKELMEVIEELLN
1621	MKSILLVDDSETLRKIIKFALESKGYKVILAPNGIEALEKLKEFRPDLIIVDLRMPPMNGLELLKILANDPELRNIPVVVLSADRDPEVEKRALEAGANAYIPKPFSIKELMEVVEKLLN
1622	MKSILLVDDSETLRKVIEFALKKEGYTVVRAPDGRAALEELEKRLPDLIIVDLRMPLMDGFELLRRLREDPELREVPVLVLSGDRDPEVEERALELGADAYVPKPFSIKELMEIVKKLLE
1623	MKTILLVDDSETLAKVIKFALEKKGYKVVLAKNGIEALEKLKEFKPDLIIVDLNMPPMNGYELLKILKEDEELKNIPVIVLSLDRSPEVEKRALELGANAYIPKPFSIKELMETIEKLLN
1624	MKTVLLVDDSETLRKIISFALESEGYSVIFAPNGKEALEKLKEFLPDLIIVDLNMPPMNGFELLKILKNDEKLKKIPVIVLSADRSPEVEKKALELGANAYVPKPFSIKELMKIAKKLLN
1625	MKSVLLVDDSETLSKIISFALESRGYTVVRAKNGIEALEKLKKFTPDLIIVDLSMPPMNGLELLKKLKEDEKLKNIPVIVLSLNRDPEVEKEALEAGADAYIPKPFSIKELMEVVDKLLN
1626	MKTVLLVDDSETMRKVISFALESEGYKVIWAPNGIEALEKLEKFLPDLIIVDLSMPPMNGFELLKILKNDEKLRDIPVIVLSGNRDPEVEEKALELGADKYVPKPFSVEELLKVAKELLE
1627	MKKILLVDDSETLRKIISFGLEKKGYSVVYAKNGIEALKKLEEFLPDLIIVDLSMPPMNGFELLKKLKNDEKLKNIPVVVISLDRDPEVEEKCLELGANAYVPKPFSIKELLEIIEKLLN
1628	MKSVLLVDDSETLRKIISFALKSRGYTVVYAPNGIEALEKLKKFLPDLIIVDLSMRPMNGLELLKILKEDEELKKIPVVVLSANRDPEVEEECLKAGADKYVPKPFSIEELMKIVEELLN
1629	MKKVLVVDDSETLRKVITFALESRGYEVVLAPNGVEALEKLKEFLPDLIIVDLNMPPMDGLTLLKILKNDEKLKNIPVVVISADSDPEVEKEALEAGANKYIPKPFSISELMEVVDKLLN
1630	MKSVLLVDDSETLRKVISFALEKEGYSVVFAPNGKEALKKLEKFLPDLIIVDLRMPPMNGYEFLKILKNDEKLKNIPVVVISGDRSPEVEEKALKLGANKYVPKPFSIKELMEIVKKLLN
1631	MKSVLVVDDSETLNKIITFALESEGYKVILAKDGKEALEKLKKEIPDLIIVDLNMPKMNGFELLKILKNDEELKNIPVIVLSADRDPEVEKEALELGADAYVPKPFSIKELMEIAKKLLN
1632	MKSVLLVDDSETLAKIITFALEKRGYTVVLAPNGKEALEKLKKFLPDLIIVDLSMPLMNGLELLRILKEDEKLKNIPVIVLSANRDPEVEKEALEAGANAYVPKPFSIKELLEVAEKLLN
1633	MKKILLVDDSETLRKIISFALESEGYEVILAKDGIEALEKLKEFLPDLIILDLSMPKMNGFEVLKILKNDEKLKKIPVVVISGNRDPEVEKKALEAGANAYIPKPFSIKELMEVVKKLLN
1634	MKTILLVDDSETMNKIIKFGIEKEGYKVILAKDGIEALEKLKEFLPDLIILDLRMPKMNGFELLKKLKNDEKLKDIPVIVLSGDRSPEVEKKCLELGADAYVPKPFSISELMEIIKKMLN
1635	MKTILLVDDSETLQKIISFALESEGYSVILAKNGKEALEKLKKQLPDLIIVDLKMPPMNGLELLKILKNDEKLKNIPVVVLSADSSEEIKEKCLELGADKYVEKPFSIQELMEIIKELLN
1636	MKSILLVDDSKTLSKIISFALEKEGYKVVLAPNGKEALEKLKEFLPDLIIVDLNMPPMNGFELLKILKEDEKLKKIPVIVISRDRDPEVEKEALELGANKYIPKPFSIEELMKEVKKLLN
1637	MKSILLVDDSETLRKIISFALESEGYKVIYAPNGKAALEKLEKELPDLIIVDLSMPPMNGFELLKILKENEKLKKIPVVVLSRDRDPEVEEKALKLGADAYVPKPFSIKELMEIVKKLLN
1638	MKSILLVDDSETLSKIISFALEKEGYTVVLAKNGKEALEKLKEFLPDLIIVDLNMPIMNGYELLKILKEDEKLKKIPVIVLSADRDPEVEKEALELGANAYVPKPFSIEELIKIVKKLLN
1639	MKKILLVDDSETLRKVIKFALESEGYEVIEAKNGKEALEKLKKFLPDLIIVDLSMPPMDGFELLKILKEDPKLKKIPVIVLSKNRDPEVEKKALELGANKYVPKPFSIKELIKIVKELLN
1640	MKKVLLVDDSETLQKIITFALESKGYKVILAKNGKEALEKLKEFLPDLIIVDLRMPLMNGYELLKILKNDEELKKIPVVVISGDRDPEVEKKALELGANKYVPKPFSIKELMEVVEKLLE
1641	MKTVLLVDDSETLNKVIKFAIEKKGYKVILAKNGKEALEKLEKFLPDLIIVDLRMPPMNGFELLKILKNNEKLKNIPVVVLSRDRTPEVEEKALKLGANKYVPKPFSISELMEIIEELLN
1642	MKTVLLVDDSETLRKIISFALEKKGYKVVYAPNGKEALEKLKKFLPDLIILDLRMRPMNGLELLQTLANNPELAKVPVIVLSADRDPEVEEEALAAGASAYVPKPFSIEELIAIAEKLLN
1643	MKSILLVDDSETLRKIISFALESEGYTVVFAKNGKEALEKLEKFLPDLIIVDLSMRPMNGFELLKKLAEDEKLRKIPVVVLSLDSTPEVKERALKAGANAYIEKPFSIKELMEVVKKLLN
1644	MKSVLLVDDSETLRKIISFGLESKGYKVIFAPNGIEALKKLEEFRPDLIIVDLRMPLMNGFELLRILREDPELRDIPVVVLSADRDPEVEKECLEAGADAYIPKPFSIEELLKVVEELLN
1645	MKTVLLVDDSETERKIISFALEKRGYKVIFARNGREALEKLKKFRPDLIIVDLRMPPMDGYELLRILAEDPELRKIPVLVLSRNRDPEERERALALGANAYIPKPYSIEELMKVVEKLLN
1646	MKSILLVDDSEVLSKIISFALESKGYKVVRAPNGIEALEKLKEFLPDLIILDLNMPKMNGFEVLKILKNDPELKNIPVVVLSADRDPEVEKKALELGANAYVPKPFSIKELMEIIEKLLN
1647	MKSVLLVDDSETLRKVIKFAIEKEGYTVVEAPNGKEALEKLEKFLPDLIIVDLSMPPMNGFELLKILKNDEKLKNIPVIVLSRNRDPEVEEKALELGADKFIPKPFSIEELMKVIKKMLE
1648	MKSVLLVDDSEVLRKIISFALESKGYKVIFAENGIEALKKLEEFLPDLIIVDLRMPLMDGFELLKILKNDEKLKNIPVIVLSADRSEEVKKRALELGANAYVPKPFSIKELMKIAEKLLN
1649	MKSVLLVDDSETLRKIISFALEKEGLSVIYAKDGKEALEKLEKSTPDLIIVDLSMPKMNGFELLEILKNNPELKKVPVVVLSADRDPEVEERCLKAGANAYVPKPFSIEELMKIVKKLLN
1650	MKSVLLVDDSETLRKIISFALESEGYSVIFAPNGKEALEKLKEFKPDLIIVDLSMPIMDGFTLLKILKEDEELKNIPVLVLSANRDPEVEEEALKLGANAYVPKPFSIKELIEIVKKLLN
1651	MKSILLVDDSETLRKIIEFALKSRGYTVVRAPNGVEALEKLEEFLPDLIILDLRMPPMDGFEVLRTLKEDPELRKIPVLVLSADRDPEVEERCLELGADAYVPKPFSIEELMKIVEKLLN
1652	MKKVLLVDDSETLSKIISFALESEGLEVILAKDGVEALKKLEEFLPDLIIVDLRMPKMNGFELLKRLKNNEELKKIPVVVLSGDRSPEVEQRALELGADKYIPKPFSISELMEVVKKLLN
1653	MKSVLLVDDSETLRKIISFALEKEGYTVVYAPNGVEALKKLKEFLPDLIIVDLRMPPMNGLELLKILANNPELKNIPVIVLSGDRSPEVEKKALEAGAKAYIPKPFSIEELMKVVKKLLN
1654	MKKVLLVDDSETLRKIISFALKSEGYEVIEAPDGIEALKKLEEFLPDLIILDLRMPKMNGLEVLEKLKNDEKLKKIPVVVLSRDRSPEVKEKALKAGANAYVPKPFSISELMEIVKKLLN
1655	MKSVLLVDDSETLSKVISFALESEGYKVVLAKNGVEALKKLKEFLPDLIIVDLSMPLMDGLTLLKELKNDPELRKIPVVVLSGNRDPEVKEKCLKAGADKYIPKPFSIKELIKVVKELLN
1656	MKSILLVDDSETLRKIISFALESEGYTVVEAKNGKEALEKLKKFLPDLIIVDLSMPPMNGLELLKELKNDEKLKKIPVIVLSGDRSPEVEKKCLEAGANAYIPKPFSIKELMEVVKKLLN
1657	MKSVLVVDDSETLQKIITFALEKEGYTTVLAPNGKEALEKLEKFLPDLIICDLSMPPMNGFELLKILKNDEKLKDIPVIVLSGNRDPEVEKECLEAGANAYIPKPFSIEELIKTAKKLLN
1658	MKSVLLVDDSETLSKIIKFAIEKKGYTVTLAPDGIEALEKLEEFLPDLIIVDLRMPKMNGLELLKILKENEELRKIPVVVISGDRSEEVKKECLELGADYYVPKPFSIEELMKIIEKLLN
1659	MKSVLLVDDSETLRKIIKFALEKEGLKVIEAPNGKEALEKLKESLPDLIIVDLRMPPMNGFEFLKKLKEDEELRKIPVVVLSGDSTEEVKEKALKLGANKYIPKPFSISELMEVVKELLE
1660	MKKVLLVDDSETLRKIISFGLEKKGYSVVYAPNGIEALEKLKEFLPDLIIVDLRMPKMDGFTFLKILKEDEKLKEIPVIVLSADRSPEVEQKCLEAGANAYVPKPFSISELLKIVEELLN
1661	MKSVLLVDDSETLQKIISFALESEGWTVIRAKDGIEALKKLEKELPDLIIVDLRMPKMNGLELLRILKEDPKLKEVPVIVLSADRDPEVEKECLEAGANAYVPKPFSIQELIEIAKKLLN
1662	MKSILLVDDSETLNKIIKFSLEKEGYTVVLAPNGIEALEKLKEFLPDLIIVDLSMPPMNGFELLKILKEDPKLKNIPVIVLSLDRDPEVEERCLKAGANAYVPKPFSIKELMEIVKKLLN
1663	MKKILLVDDSETLRKIISFALKKRGYEVVFAKDGKEALEKLKKFKPDLIIVDLNMPKMNGYELLKILKEDEELKNIPVIVLSLDRSPEVEEEALKLGADKYIPKPFSIEELMKVVEELLN
1664	MKSVLLVDDSETLRKIISFALESEGYTVIFAKNGIEALKKLEKTLPDLIIVDLRMPPMNGFELLKILKNDEKLKNIPVIVLSGDRSPEVREKCLKLGADYYIPKPFSISELIEVAKKLLN
1665	MKSVLLVDDSETLRKIISFALEKEGYTVVFAPDGIEALEKLKEFLPDLIIVDLSMPKMDGFELLKILKNDEELKKIPVVVISLDRDPEVEKECLELGADKYIPKPFSIEELMKVVKELLN
1666	MKSILLVDDSETLSKIIKFALEKKGYKVTLAKNGKEALEKLKEFLPDLIIVDLNMPPMNGFEFLEKLKNDPELKKIPVIVISGDRTPEVEERCLKLGANYYIPKPFSIEELMKVVEKLLN
1667	MKSILLVDDSETLSKIIKFALEKEGYKVILARDGKEALEKLKKFLPDLIIVDLRMPKMDGLELLKILKEDEKLKKIPVVVLSGDRSPETEKRCLEAGANKYIPKPFSIEELIKVVKKLLN
1668	MKKVLLVDDSETLCKVIEFALKSEGLEVVRAPNGKAALEKLEEFLPDLIIVDLDMPPMNGFELLKKLKEDEKLKEIPVVVISRDRSPEVEKEALEAGADAYVPKPFSIEELMEIVKKLLE
1669	MKKILLVDDSETLRKIISFALESKGYSVIFAKNGKEALEKLKKFTPDLIIVDLRMPPMNGFELLKILKNDEKLKNIPVIVLSADRDPEVEKKCLEAGANAYVPKPFSIQELMKIVEKMLN
1670	MKSVLLVDDSETLSKIISFALEKEGWTVVRAPNGKEALEKLKEFLPDLIIVDLSMPPMNGFELLKILKNDPKLKDIPVIVLSKDRSPEVEEEALKLGADAYIPKPFSIKELIEVAKKLLE
1671	MKSVLLVDDSETLRKIIKFALESRGYTVIEAKNGKEALEKLKEFLPDLIIVDLLMPPMNGFELLKILKEDEELKNIPVIVLSLDRDEEVKQKALELGANAYVPKPFSIKELMEIVEKLLN
1672	MKKVLLVDDSETLRKIIKFILEKEGLEVIEAKNGKEALEKLKEFLPDLIIVDLRMPPMNGFELLKILKNDEELKKIPVVVLSLDRTPEVEKRALEAGADAYVPKPFSPQELMAIVKKLLE
1673	MKKILLVDDSETMRKIITFALESEGYSVVLAKDGIEALKKLEKFLPDLIIVDLNMPKMNGYELLKILKNNEKLKKIPVIVLSANRDPEVEKKCLELGANAYIPKPFSISELMKVVKELLN
1674	MKSVLVVDDSETLQKIITFALEKEGYTVTLAPNGKAALEKLKEQLPDLIILDLRMPPMNGFELLKILKNDPKLKNIPVIVLSADRDPEVEKKALELGANKYIPKPFSIKELIEVAKKLLN
1675	MKKVLLVDDSETLRKIITFALEKEGYKVIEAKNGKEALEKLKEFLPDLIIVDLNMPPMNGLELLKILKNDEKLKNIPVIVISKDRTPEVEKIALEAGANKYIPKPFSIEELIKVAKELLE
1676	MKTILLVDDSETLRKIIKFGLEKKGYKVIEAPDGIEALEKLEKFLPDLIIVDLRMPKMNGFELLKKLKEDEKLKEIPVIVLSRDRSPEVEEEALKAGANKYIPKPFSIEELLKVAEKLLN
1677	MKSVLLVDDSETLSKIISFALESEGYKVIFAPDGIEALEKLKEFLPDLIIVDLNMPKMNGLELLKILKEDEKLKKIPVVVLSADRDPEVEKEALELGANKYVPKPFSIKELMKVVKKLLE
1678	MKSVLLVDDSKTLRKIISFALESKGYTVTLAEDGIEALEKLKKSLPDLIIVDLRMPKMNGLEFLKILKNDEELKNIPVIVLSLDSSPEVEKKCLELGANKYIPKPFSIKELMEEVEKLLN
1679	MKTVLVVDDSETLNKVITFILEKEGLKTILAPDGVEALKKLKEFLPDLIIVDLRMPKMNGFELLKILKENEELKKIPVIVLSLDRDPEVEKECLELGANKYVPKPFSPKELMEVAKKLLE
1680	MKSVLLVDDSETLRKIISFALEKEGYTVVFAPNGIEALKKLKEFLPDLIIVDLSMPLMNGFELLKILKNNPELKKIPVIVLSGDRDPEVEKKALELGADKYIPKPFSISELMEVVKELLN
1681	MKTVLLVDDSETLRKIISFALESEGYKVIYAKNGKEALEKLKEFTPDLIICDLRMPLMNGLEFLKILKNDEKLKKIPVIVISKDRTPEVKERCLEAGADAYIPKPFSIKELMEVVKKMLN
1682	MKSVLLVDDSETLRKIISFALEKEGLTVTFAKDGVEALEKLEKELPDLIIVDLRMPKMNGLELLRRLAEDPELRKVPVIVLSLDRSPEVEEEALAAGASAYIPKPFSISELMKVAKKLLE
1683	MKSVLLVDDSETLRKIISFALEKEGYTVVLAKNGKEALEKLKEFLPDLIILDLRMPPMNGFEVLKILKEDEELKKIPVIVLSRDRDPEVEEKCLKLGADAYIPKPFSISELMEVVKKMLN
1684	MKTVLLVDDSETLRKIISFALEKEGYKVVYAPDGIEALKKLKEFLPDLIIVDLRMPKMNGLELLKILKNDEKLKKIPVVVISRDRSPEVEKECLEAGANAYIPKPFSISELMEVVKKLLN
1685	MKSVLLVDDSKTLQKVISFALKKEGLKVVYAPDGKAALEKLKKFLPDLIIVDLRMPPMNGFELLKILKNDEELKKIPVIVLSGDRDPEVEEKALELGANAYIPKPFSIEELMKVVKELLE
1686	MKSVLLVDDSETLNKVISFALESKGYSVTLAPNGIEALKKLEEFLPDLIICDLSMRPMNGFELLKILKENEKLKNIPVIVLSANRDPEVEKKCLELGANYYIPKPFSIKELIEVVEKLLN
1687	MKKVLVVDDSKTLRKIITFALESKGYSVVLAEDGVEALKKLEKFLPDLIIVDLRMPKMNGFELLKKLKEDEKLKEIPVVVLSGDSSPEVKEECLKLGADAYIEKPFSISELMKVVEELLN
1688	MKSILLVDDSETLRKIISFGIKKEGYSVVYAPNGKAALEKLKKFLPDLIIVDLNMPPMNGYELLKILKENEELKKIPVVVLSADRDPEVEEKALKLGANKYIPKPFSIKELMEVIKELLN
1689	MKSILLVDDSETLRKIISFALESRGYSVVLAPNGIEALKKLEEFLPDLIILDLRMPPMNGFEVLKILKNDEKLKNIPVVVLSRDRSPEVEKEALELGADAYVPKPFSIKELMEVVEKLLN
1690	MKSILLVDDSETLSKIISFALEKEGYTVTLAPNGKAALEKLEKFTPDLIIVDLSMPPMNGLELLRVLKNDPKLKKIPVVVLSGNRDPEVEEEALKAGADAYVPKPFSIKELIEIVKKLLE
1691	MKKILLVDDSETLSKIITFALEKEGYEVILAKNGKEALEKLKKFLPDLIILDLNMPPMNGLEVLKILKNNEKLKKIPVIVVSGDRSPEVEKRCLEAGANAYIPKPFSIEELMKVVKELLE
1692	MKSVLLVDDSETMQKIISFALEKEGYSVIRAPDGIEALKKLEEFTPDLIIVDLRMPKMNGYELLRILREDPELREVPVVVLSGNKDPEEEQRALELGADAYVPKPFSIQELLEVVKKLLE
1693	MKSVLLVDDSETLSKVIKFALEKEGYTVTLAKNGIEALEKLKEFLPDLIILDLSMPPMNGYEVLKILKNDEKLKEIPVIVLSGDRSPEVEKRALELGANYYIPKPFSIKELMKVAKELLN
1694	MKKVLVVDDSETLNKVITFALEKKGYEVVLAKNGIEALKKLEEFLPDLIIVDLRMPPMDGFTLLKILKNDPKLKKIPVVVLSADRSEEVKERALKAGADAYVPKPFSIEELIEIVEKLLN
1695	MKSILLVDDSEVLRKIISFALESKGYKVVFARNGKEALEKLKEFLPDLIIVDLRMPPMNGYELLKILKEDEKLKNIPVIVLSADRDPEVEERCLELGADYYIPKPFSIKELIEVVEKLLN
1696	MKKVLLVDDSETMRKIISFALESRGYKVIFAPDGIEALEKLEKELPDLIIVDLNMPKMNGYELLKILKNDEKLKNIPVVVLSADRSEEVKERALKLGANAYVPKPFSISELIEIIEKLLN
1697	MKKILLVDDSETLSKIISFALKSRGYEVILAKNGKEALEKLKEFLPDLIIVDLKMPLMNGFELLEILKNDEELKKIPVIVLSGDRDPEVEERCLKLGADAYIPKPFSIQELMEVVDKLLN
1698	MKKVLLVDDSETLRKIITFALEKEGLEVVLARNGIEALEKLKEFLPDLIIVDLNMPPMNGLELLKILKNNEELKKIPVIVLSGDRDPEVKEEALKAGANAYVPKPFSIEELMKIAKKMLE
1699	MKKVLLVDDSETLRKIIKFALESEGYKVVEAPNGKEALEKLKEFLPDLIIVDLDMPLMNGFELLKILKEDEKLKEIPVIVLSKDRTPEVEEKCLKLGADAYIPKPFSIKELIEVAKKLLN
1700	MKSVLLVDDSETLSKIITFALESKGYSVVLAPNGVAALEKLKEQLPDLIIVDLSMPPMDGYELLRVLKNDPELRKVPVVVLSLDRSPEVEERALALGADAYVPKPFSISELMEIVEKLLN
1701	MKSVLLVDDSEVLRKVISFALEKEGYTVKLAKDGIEALKKLEEFLPDLIILDLEMPKMNGFELLKILKNNEKLKKIPVIVLSKDRSEEVKKEALELGANKYIPKPFSIEELMKVVKELLN
1702	MKSILLVDDSETLQKIITFALESEGYTVIRAPNGIEALKKLEKELPDLIIVDLSMPPMNGLELLKILKNDEKLKNIPVVVLSRNRDPEVEQKCLEAGADAYIPKPFSIEELMKVVKELLN
1703	MKSILLVDDSETLRKIISFALEKEGYKVYLAPDGKEALEKLEKFLPDLIILDLRMPKMNGFELLKILKENEELKKIPVIVLSLDSDPEVEKEALEAGADAYIPKPFSIKELMEVVKKMLE
1704	MKSVLLVDDSEVLRKIISFALEKEGYKVVYAENGIEALKKLEEFLPDLIIVDLRMRPMNGLELLKKLKNDEELKNIPVIVLSADRDPEVEKECLEAGANAYVPKPFSIEELIKIAKELLN
1705	MKSILLVDDSETLRKIISFALESEGYSVTFAKNGKEALKKLKEFIPDLIIVDLKMPIMNGFELLKILKEDEKLKKIPVIVLSADRSEEVKEKCLKLGANKYVPKPFSIEELIKIVKELLN
1706	MKKVLLVDDSETMRKIISFAIKSKGYEVVFAPNGIEALKKLEEFLPDLIIVDLNMPPMNGFELLKILKNNEKLKKIPVIVLSLDEDEEVKKKCLELGANYYIPKPFSIKELMEVIEKLLN
1707	MKKVLLVDDSETLRKVIKFGLEKEGLTVIEAPNGKEALEKLKEFKPDLIILDLNMPPMNGFEVLKILKENEELKNIPVIVLSGDTSEEVKKKCLELGANKYIPKPFSIKELMEEVKKLLN
1708	MKSILLVDDSETLSKIIKFSLESRGYKVILAKNGIEALEKLKEFLPDLIIVDLRMPKMDGYTLLKILKEDEKLKNIPVVVLSADTSPEVEKEALELGANAYVPKPFSIKELMEIVEKLLN
1709	MKSILLVDDSETLRKIISFALESEGYTVVFAPNGIEALKKLEEFLPDLIILDLNMPPMNGFEVLKILKEDEKLKNIPVIVLSADRDEEVKEKALKLGANAYVPKPFSISELMKIVKKLLE
1710	MKKVLLVDDSETLSKIIKFAIEKEGYEVILAKNGIEALKKLEEFLPDLIICDLRMPKMNGLELLKILKNNEKLKKIPVIVISKDRDPEVKKKCLELGANYYIPKPFSISELMKVIKKLLE
1711	MKTILLVDDSETLSKVITFALEKEGYKVILAPNGKAALEKLEKFLPDLIIVDLSMRPMDGFELLKILKEDPERKNIPVVVLSLDRSPEVEERCLELGANKYVPKPFSIKELMKIVKELLN
1712	MKSVLLVDDSETLRKIIKFAIESKGYTVVEAPNGIEALEKLKEFLPDLIIVDLSMPPMNGLELLKKLKEDEELKNIPVVVISGDRSPEVKQKALEAGADAYVPKPFSIEELMKIIDKLLN
1713	MKSVLLVDDSETLRKIISFALEKEGYTVTLAPNGKEALEKLKEFLPDLIIVDLRMPPMDGFELLKELKNDEKLKKIPVIVLSLDRDPEVEKEALELGADKYIPKPFSISELMEEAKKLLE
1714	MKKVLLVDDSEVLRKIITFALEKRGLKVVEAKNGKEALEKLKEFTPDLIIVDLRMPLMDGFTLLKILKNDEKLKNIPVVVISGDRDPEVEKKALELGASKYIPKPFSIEELMKVVEKLLN
1715	MKKILVVDDSETLNKIITFALEKEGYEVVLAPNGKEALKKLEEFLPDLIILDLRMPPMNGFELLKKLKEDEELKKIPVIVLSADRDPEVEEEALKLGANKYIPKPFSIEELMEVVKKMLN
1716	MKKVLVVDDSETLRKIITFALEKKGYSVVLAPNGKEALEKLKKFLPDLIICDLRMPPMNGLELLKILKEDEKLKNIPVVVLSADRSPEVEKECLEAGADAYIPKPFSIKELMKVVEKLLN
1717	MKSVLLVDDSETLRKIISFALEKEGYTVTFAKDGKEALEKLEKFLPDLIIVDLEMRPMNGFELLKTLKENEELKNIPVVVLSANRDPEVEEEALELGADAYIPKPFSISELMEVVKKLLN
1718	MKSVLLVDDSETLAKIISFALESKGYSVILAKDGKEALEKLKEFTPDLIILDLSMPKMNGFELLKKLKEDEELKKIPVIVLSLNRDPEVEEKALKAGANAYIPKPFSIQELIKVAEKLLN
1719	MKSVLLVDDSETLSKIISFALERRGYTVTLAPNGKEALEKLKEFLPDLIIVDLRMRPMNGYELLKILKNDEKLKDIPVLVLSRDRSPEVEEKALKLGADAYIPKPFSIQELMEVVDKLLN
1720	MKKILLVDDSETLRKIISFALESKGYEVVFAPDGIEALKKLEEFLPDLIIVDLRMPKMNGYEFLKILKNNEKLKNIPVIVISKDTSPEVKEKALKLGANKYVPKPFSIEELIKIVEELLN
1721	MKTVLLVDDSETLNKIITFAIEKKGYKVVLAPNGKEALEKLEKFLPDLIILDLNMPIMNGFEVLKILKNNEELKNIPVIVLSGDRDPEVEKRALELGANKYIPKPFSIEELMKEIEKLLN
1722	MKSILLVDDSETLAKVIKFALESRGYKVVLAPNGKEALEKLKKFLPDLIIVDLRMPPMNGFELLKILKNDEKLKNIPVIVLSRDRSPEVEEKCLKLGANKYIPKPFSIQELMKVVEELLN
1723	MKTILLVDDSETLRKIIKFALESKGYKVIYAKDGIEALEKLKEFLPDLIIVDLSMPKMNGLELLKILKEDEKLKKIPVVVLSGNRDPEVEKKALELGANKYVPKPFSIKELMEIIEELLN
1724	MKKVLLVDDSETLRKIISFALESEGLEVVFAPNGKEALEKLEKFLPDLIICDLLMPPMNGLELLKKLKNDEKLKNIPVIVISGRRDPEVEKECLENGANYYIPKPFSIQELMKVVKKLLE
1725	MKKVLLVDDSETLRKIISFALESEGYSVVYAKDGVEALKKLEEFLPDLIIVDLSMPKMDGFTLLKILKENEELKKIPVIVISRDRDPEVEEKCLELGANAYIPKPFSIKELIKVVKKLLN
1726	MKKILLVDDSETLRKVISFALESKGYEVIFAPNGKEALEKLKEFLPDLIIVDLRMRPMNGFELLKILKEDEELKKIPVIVVSADRSPEVEQEALELGADAYVPKPFSIKELIEIVEKLLN
1727	MKSVLLVDDSETLRKIISFVLESRGYSVVFAPNGIAALEKLKEFLPDLIILDLRMPPMNGFEVLRILRNDEKLREVPVLVLSGDRDPEVKKRALELGADAYIPKPFSLEELMKEVEKLLN
1728	MKKVLLVDDSETLRKIITFALKSEGLEVVEAPDGKEALEKLKEFLPDLIIVDLRMPPMDGLELLKRLKNDPELRKVPVIVLSADRDPEVKKRALEAGADKYIPKPFSIKELMEVVKELLE
1729	MKSILLVDDSETLRKIISFALESEGYTVIFAPNGIEALKKLEKELPDLIIVDLDMPPMNGFELLKKLKNNEELKKIPVVVLSRDRSPEVEKKALELGADAYIPKPFSIKELIEVIKKMLN
1730	MKKILLVDDSETLSKIISFALEKEGYSVVLAKNGKEALEKLKEFKPDLIILDLRMPPMDGYEVLKRLKEDEELKEIPVIVLSADRDPEVEKKALELGADKYVPKPFSIKELMEEVKKLLN
1731	MKSVLLVDDSETLNKIISFALEKEGYKVILAKDGLEALEKLKKFLPDLIIVDLSMPKMDGYKLLEILKNDEELRKIPVLVLSKDRSPEVEKRALELGADAYVPKPFSIEELMKVVKELLN
1732	MKTVLLVDDSETLRKVITFALESEGYKVILAPDGIEALEKLKEFLPDLIIVDLRMPKMNGLELLKILKNDPELKKIPVVVLSLDSDPEVEEKCLELGANKYVPKPFSIKELIEIVKKLLN
1733	MKSILLVDDSKTMQKIITFALESKGYKVVLADNGKEALEKLEKFLPDLIIVDLRMPPMDGFELLKKLKENEELKKIPVVVVSLDSSPEVKEKALEAGADKYIVKPFSIEELIKVVEELLN
1734	MKSVLLVDDSETMRKIISFALESEGYKVVYAPNGKEALEKLKKFLPDLIIVDLRMPPMNGLELLKILKNDEKLKNIPVIVLSGDRTEEIKEKCLEAGANKYVPKPFSIKELIKIAKELLN
1735	MKSILLVDDSETLSKIISFALESEGYTVVLAKNGKEALEKLEKFLPDLIIVDLSMRPMNGFELLKILKENEKLKEIPVIVLSLDRSEEVKKRCLELGANKYIPKPFSISELIKVVKELLN
1736	MKSILLVDDSETLRKIITFALEKEGYSVVTAPNGKEALEKLKKFLPDLIICDLDMPPMDGFTFLEILKNDPKLKEIPVVVLSRDRSPEVERRCLEAGADAYVPKPFSIEELMKIVKEKLN
1737	MKKVLLVDDSKTLSKVIKFAIESKGYSVILASNGKEALEKLKEFLPDLIIVDLRMRPMNGYELLKILKNDPKLKKIPVIVLSLDRDPEVEKKALELGANKYIPKPFSIKELMEVIEKLLN
1738	MKKVLLVDDSETLRKIIKFALESKGYKVVLAKDGVEALKKLKEFKPDLIIVDLSMPKMNGLELLEILANDPELKEIPVVVISKDRTPEVEEKALKAGANKYVPKPFSIEELIKIVEELLN
1739	MKSILLVDDSETLSKIISFALEKEGYTVVRAPNGKEALEKLEEFLPDLIICDLNMPLMNGFELLKILKENPELRKIPVIVLSADRSPEVEKECLELGADKYVPKPFSIKELMEIAKELLN
1740	MKKILLVDDSETLRKIISFALESEGYSVIYAKNGIEALKKLEEFLPDLIIVDLSMPPMNGFELLKKLKEDEKLKKIPVIVISADRTPEVEEKALKLGANAYVPKPFSIKELIELVKKLLN
1741	MKTVLLVDDSETLRKIIKFALEKEGYKVIEAPNGVAALEKLEEFLPDLIIVDLRMPPMNGLELLRRLAEDEELRKVPVIVLSLDRTPEVEQRALEAGANAYIPKPFSIEELMKVAKKLLN
1742	MKKVLLVDDSETMAKIISFALEKEGLEVVLAPDGRAALEKLEEFTPDLIILDLRMPPMDGLELLRRLKEDEELREVPVIVLSGDSSPEVEKECLEAGADAYIPKPFSIKELMEVVKKMLE
1743	MKSVLLVDDSETLAKIIKFGLESEGYTVTLARNGKEALKKLEKFTPDLIIVDLSMPPMNGFELLKILKNDEKLKKVPVIVLSRDSSPEVEQKALEAGANAYVPKPFSISELMEIVKKMLN
1744	MKSVLLVDDSETLRKIISFALEKEGYSVVFAKDGKEALEKLKEFLPDLIIVDLRMPPMNGYELLKILKNDEKLRNIPVIVLSTNRDEEVKERALELGANAYIPKPFSIEELIEVAKKLLE
1745	MKKILLVDDSETLRKIISFALESRGYSVVYAPDGIEALEKLKKFKPDLIICDLRMPKMDGLTLLKILKNDEELKNIPVIVLSLDRDPEVEEECLKAGANAYVPKPFSITELMEIVEKLLN
1746	MKKVLLVDDSETMSKIISFVLEKKGYKVILAPNGKEALKKLEKELPDLIIVDLNMPLMNGFELLKILKNDEKLKKIPVLVLSGDRDPEVEKKCLELGANAYIPKPFSPEELMKVVEELLN
1747	MKTILLVDDSEVLRKVISFALESEGYKVIFAKNGIEALKKLEEFLPDLIIVDLSMRPMNGEELLKKLAEDEKLKEIPVVVLSGNRDPEVEQRALELGANAYIPKPFSIQKLMEVVKKLLN
1748	MKSVLLVDDSETLRKIISFALEKEGYTVTFAENGIEALEKLKEFTPDLIIVDLRMPPMNGYELLKILKNDEELKNIPVIVISGDRSPEVEKKCLELGANKYVPKPFSIEELIKEVKKLLN
1749	MKSILLVDDSETLRKIISFGLKSKGYTVVFAPNGKEALEKLEKFTPDLIILDLRMPPMNGFELLKKLKEDEKLKKIPVVVLSLDRDPEVEEKCLELGANKYIPKPFSISELLEVVEELLN
1750	MKTILLVDDSETLRKIISFALESKGYKVIFAPDGKKALEELEKFLPDLIIVDLSMPPMNGFELLRILKENPKLKKIPVVVLSKDRSEEVKEKALELGANAYIPKPFSIKELMKVVEKLLN
1751	MKTILLVDDSETLNKVIKFAIEKEGYKVILAKDGKEALEKLEKFLPDLIICDLNMPLMNGYELLKKLKEDEKLKNIPVIVLSGDRDPEVEKKCLELGADKYIPKPFSIKELMEVIKKMLN
1752	MKKILLVDDSETLRKIISFALEKEGYEVILAENGVEALEKLKEFLPDLIIVDLRMPPMNGFELLRELKNDPKLREVPVVVLSRDRSPEVEKEALELGADAYVPKPFSIQELLEVVKKLLE
1753	MKSVLLVDDSETLRKVIKFALEREGLKVIEAKDGVEALEKLKKSLPDLIILDLSMPKMNGFEVLKILKENEKLKNIPVIVLSLDRDPEVEKKCLELGANKYVPKPFSIKELMEEAKKLLE
1754	MKKVLLVDDSETLRKIIKFALESEGYEVVEAKNGIEALEKLKKFLPDLIILDLSMPPMNGFEVLKILKNDEKLREIPVIVISTDRDPEVEKRCLELGADKYIPKPFSISELLKVAKELLN
1755	MKSILVVDDSETLRKIITFGLEKRGYSVILAKDGKEALEKLKESLPDLIICDLSMPIMNGLELLKILKEDEELKKIPVIVLSANRDPEVEQRCLELGANAYIPKPFSIEELMKVIEKLLN
1756	MKKILLVDDSETLRKIISFALESKGYKVIYAPNGKEALEKLKKELPDLIIVDLSMPKMNGLELLKILKEDEKLKNVPVIVISGNRDPEVEEEALKAGADAYIPKPFSIEELIKVIEKLLN
1757	MKTVLLVDDSKTLSKIITFALESKGYKVVLAPNGKEALEKLEEFLPDLIIVDLSMPLMNGFELLKKLKEDEELKNIPVIVLSADRDEEVKEKALKAGANYYVPKPFSIQELMEIADKLLN
1758	MKSVLLVDDSETLSKIITFALESEGYSVVLAPNGKEALEKLKKFLPDLIILDLRMRPMNGEEVLRILKENEELKKIPVVVLSGDRDPEVEERALELGADAYVPKPFSIKELIEIVKKLLE
1759	MKKVLLVDDSETLRKIISFVIKKEGYEVIEAKDGKEALEKLKKSLPDLIIVDLDMPKMNGRELLKILKNDEELKNIPVIVLSANRDPEVEKEALELGADYYIPKPFSLKELMEVIKKLLN
1760	MKSILLVDDSETMSKIISFALEKEGYTVTLAPDGIAALEKLKEFLPDLIIVDLRMPKMDGFELLKILKNDEKLKNIPVVVLSADRSPEVEKKALELGADKYVPKPFSIKELVEIIKELLN
1761	MKSILLVDDSETLTKVITFALKSRGYSVVTAPNGIEALEKLKEFKPDLIIVDLRMPPMDGFTLLKILKENEELKNIPVIVLSADRSPEVKERALEAGADKYIPKPFSIEELMEVVEELLN
1762	MKTVLLVDDSETLRKIISFALESKGYKVIYAPNGIEALKKLEEFLPDLIIVDLRMPPMNGFELLKKLKENPELKKIPVIVLSGDRDPEVEKKALELGANKYIPKPFSIKELMEVVEKLLN
1763	MKSVLLVDDSETLRKIISFALEKEGLTVIYAPNGIEALEKLKEFLPDLIIVDLNMPPMNGFELLKILKNNEKLKNIPVVVLSADRSEEVKEECLKNGANKYVPKPFSIEELMKVVKELLN
1764	MKSILLVDDSETLRKIISFALESEGYTVVYAPNGIEALEKLKEFKPDLIIVDLSMRPMNGFELLEILKNDEELKNIPVVVLSGDRDPEVEKRCLELGADAYVPKPFSIKELIEVVKKLLE
1765	MKSILLVDDSETLRKIISFALEKKGYTVTYAPNGKEALEKLEKFLPDLIIVDLRMPPMNGYELLKILKNNEKLKNIPVLVVSGDRDPEVEKRCLELGANAYIPKPFSIEELMEVVEKLLN
1766	MKTVLVVDDSETLRKIITFAIESEGYKVILAKDGVEALEKLEKFTPDLIIVDLSMPKMNGFELLKILKEDEKLKKIPVIVLSLDRSPEVEKECLELGANAYVPKPFSIKELMEIIKKLLE
1767	MKSVLLVDDSKTLQKIISFILEKEGYSVVLAPDGKAALEKLKKFLPDLIIVDLSMPKMNGLELLKILKNDPELKKIPVIVLSGDADEEVKKKALEAGANAYVEKPFSPSELMEIAKKLLN
1768	MKSVLLVDDSETLRKIISFALESEGLTVVYAPNGKEALEKLKKFLPDLIIVDLNMPIMNGFELLKILKEDPKLKEIPVVVLSADRSPEVEEKALELGADKYIPKPFSIEELMKVVKELLN
1769	MKKVLLVDDSETLNKIIKFALEKEGYKVVLADNGIEALKKLEEFLPDLIIVDLRMPPMDGFELLKILKENEKLKEIPVIVLSRDRDPEVEEEALKLGADAYIPKPFSIEELMKVAKKLLN
1770	MKTVLVVDDSETLRKVITFALESEGYTVILAKNGIEALEKLKEFLPDLIILDLSMPPMNGYEVLKILKEDEKLKEIPVVVLSKNRDPEVEKKALELGADAYIPKPFSIKELMEVVKKLLE
1771	MKKILLVDDSETMRKVIKFAIEKEGYEVVEAPDGIEALEKLKEFKPDLIIVDLRMPKMNGFELLKILKNDEELKNIPVIVLSLDRDPEVEKKCLELGANAYIPKPFSIKELMEVIKKLLN
1772	MKSILLVDDSETLRKIISFSLESKGYTVIYAKNGKEALEKLKESLPDLIIVDLSMRPMNGFELLKKLKNDEKLKNIPVIVLSGNRDPKVEEEALEAGANKYVPKPFSIEELMKVVEELLN
1773	MKSVLVVDDSETMRKIITFALEKEGLTVIRAKDGIEALEKLKEFLPDLIIVDLRMPKMNGFELLKILANDPKLKKIPVIVLSLDRSPEVEEEALELGANKYIPKPFSIKELMEVAKKMLN
1774	MKKVLLVDDSETLSKIISFALKSEGYEVILAPNGIEALKKLEKELPDLIILDLRMPPMDGYELLKILKNDEKLKEIPVVVLSLDRDPEVKERCLELGANKYVPKPFSIEELMKVIKKLLN
1775	MKKILLVDDSETLRKIISFALKKKGYEVIYAKNGIEALKKLEEFLPDLIIVDLNMPPMNGFELLKILKNDEKLKNIPVVVLSADRSEEVKEKALEAGANKYVPKPFSIEELIKIVEELLN
1776	MKSVLLVDDSETLSKIISFALESKGYSVIFAPDGIEALKKLEEFLPDLIIVDLRMPKMNGFELLEKLKNNEELKKIPVIVLSRDRSPEVEERALKAGADAYIPKPFSIQELIKVAEKLLN
1777	MKSILLVDDSETLRKIISFGLESKGYKVVLAKNGKEALEKLKEFLPDLIIVDLSMPPMDGFTLLKILKNDEELKNIPVIVLSADRDPEVEEKALELGANKYVPKPFSIEELLKVVEKLLN
1778	MKTILLIDDDEVMSKIIKFALESKGYKVILAPNGKEALEKLKEFKPDLIILDLDMPPMNGLEVLKILKNDEELKKIPVVVLSRDRTPEVEKEALEAGANAYIPKPFSISELIEVIEKLLN
1779	MKSVLLVDDSETLRKIISFALESKGYSVILAPNGVEALRKLEEQLPDLIIVDLRMPPMDGFELLRRLAADPALREVPVLVVSGDRDPEVKRRALEAGADAYVPKPFSIEELMKIVEELLE
1780	MKSVLVVDDSETLRKIITFALESKGYKVILAEDGIEALKKLEKELPDLIIVDLSMPKMDGYELLKILKNDEKLKNIPVIVISGDRDPEVKERALKLGANYYIPKPFSIKELIEVAEKLLN
1781	MKSILLVDDSETMRKIISFALESKGYTVTYAPNGIAALEKLEEFTPDLIIVDLSMPPMNGFELLRKLAENEEWRKIPVVVLSLDRSPEVEERALKLGANAYIPKPFSIKELIEVIEKLLN
1782	MKKILVVDDSETLNKIITFALESEGYEVILAPNGKEALEKLEKFLPDLIIVDLSMPPMNGLELLRILKNDEELKNVPVVVLSADRDPEVEQKALEAGADAYVPKPFSISELMEIVKKLLN
1783	MKKILLVDDSETLRKIITFAIESRGYSVVTAPNGIEALKKLEEFLPDLIIVDLRMPPMNGYELLKILKEDPELRDIPVIVLSLDRDPEVEQRALELGADAYIPKPFSIKELMEVIEKMLN
1784	MKSVLLVDDSETLRKIISFALEKKGYSVILAPNGVEALEKLKEFRPDLIIVDLRMPPMNGFELLRVLKEDPELREVPVVVLSADRDPEVEERCLEAGADAYIPKPFSIEELMEVVEKLLN
1785	MKTVLLVDDSETLRKIITFALEKEGYKVVLAKDGIEALEKLKEFLPDLIIIDLNMPKMNGKELLKILKNDEKLKKIPVIVISGDRSPEVEKECLELGANAYIPKPFSIKELMEVVKKLLN
1786	MKSILLVDDSETLRKIISFALEKKGYKVVLAPDGREALEKLEKFLPDLIIVDLSMPPMNGEELLKILKNNPKLKNIPVVVISGNRDPEVKERALELGANKYVPKPFSIKELMEIVEKLLN
1787	MKTVLLVDDSETLRKIISFALKSKGYKVIFAPDGVEALEKLKEQLPDLIIVDLRMPKMDGLELLRILANDPELRKIPVVVLSADRTPEVEQRALEAGANAYIPKPFSISELMEVVDKLLN
1788	MKTVLLVDDSETLRKIISFALESEGYKVIFAPNGKEALEKLKEFKPDLIIVDLRMPPMNGFELLKILKEDEELKNIPVIVLSLDRDPEVEKKCLELGANKYIPKPFSIEELIKVAKKLLN
1789	MKSILLVDDSETLRKIISFGLESEGYTVIFAPNGKEALEKLKKFTPDLIIVDLNMPPMNGFELLKILKNDEKLKKIPVIVLSRDRSPEVEKKALELGANAYIPKPFSIKELLEVAKKLLN
1790	MKSILVVDDSETLRKIITFALESEGYTVRLAPDGIEALRKLEEFLPDLIIVDLRMRPMNGFELLEVLKNHPELRKIPVVVLSKDRSEEVKERCLKAGADAYIPKPFSIKELMEVVKKLLN
1791	MKTVLLVDDSETLRKIISFALEKEGWSVIFAPNGKEALEKLKKFLPDLIIVDLSMPPMNGFELLKILKEDPKLRKIPVIVISTDRSPEVEKKALELGADKYVPKPFSIEELIEIAKELLN
1792	MKSVLLVDDSETLRKIISFGLESEGYSVVFAPNGKEALEKLKEFLPDLIIVDLRMPIMNGLELLKILKEDEKLKKIPVIVLSGDRDPEVEEKALEAGADAYVPKPFSIKELMEIAKKLLN
1793	MKSVLLVDDSKTLRKIIKFSLEKEGYTVIEAPNGIEALKKLKEFLPDLIIVDLNMPPMNGFEFLKILKEDPELKKIPVIVLSRDRTPEVEKKCLELGANAYVPKPFSIKELMEIAKKMLE
1794	MKSILLVDDSETLAKIISFALESEGYTVKLAKNGIEALKKLEEFTPDLIIVDLRMPPMNGFELLKILKNDEKWKNIPVIVLSGDRSEEVKQRCLEGGANKYVPKPFSISELIKIVKELLN
1795	MKSVLLVDDSETLRKIISFALEKRGYTVIYAPNGVEALEKLKEFKPDLIILDLSMPPMNGRELLRILKNDPELRNIPVIVLSLNRDPEVEEEALKLGANKYIPKPFSIEELMKVADKLLN
1796	MKKVLLVDDSETLRKIISFALESKGYEVVFAKNGKEALEKLKEFLPDLIILDLRMRPMDGFTVLEILKNDPELKKIPVVVLSGDRSPEVEKRALELGADKYVPKPFSIEELMKVVEELLN
1797	MKSILLVDDSETLRKIIKFALESKGYTVIEAPNGIEALKKLKESLPDLIIVDLSMPPMDGFTLLKILKEDPELKKVPVIVLSGDRDPEVEKKCLELGADKYIPKPFSISELIKVVEELLN
1798	MKSVLLVDDSEVLSKIITFALESKGYKVVLAKDGKEALEKLKEFLPDLIILDLSMPPMNGLEVLKILKNDEKLKKIPVIVLSTNRDPEVEKEALEAGANKYVPKPFSISELMEIAEKLLN
1799	MKTVLLVDDSKTLSKIISFALKKKGYKVILAPNGKEALEKLKEFTPDLIIVDLSMRPMNGYELLKILKEDEKLKKIPVIVLSLDRDPEVEEKCLELGANAYVPKPFSIKELMEIAEKLLN
1800	MKSVLLVDDSETLNKIISFALEKEGYTVTLAKNGIEALKKLKEFLPDLIILDLSMPLMNGFEVLKILKNDEKLKNIPVIVLSGDSSEEVKEKCLKLGANAYVEKPFSIKELLEIAKKMLN
1801	MKSILLVDDSETLRKIITFALESRGYTVIEAPDGVEALEKLKEFLPDLIIVDLSMPKMNGFELLKILKNDPELKKIPVVVISGDRSPEVEKKCLEAGANAYIPKPFSIEELMEVVEKLLN
1802	MKSILLVDDSETLSKIIKFAIESEGYSVRLAKNGKEALEKLKEFLPDLIIVDLRMPPMNGFELLKILKEDEELRKIPVIVLSGDRDEEVKERCLEAGADKYIPKPFSIKELMEVIKKLLN
1803	MKSILLVDDSETLRKIISFGLESEGYSVIYAKNGKEALEKLEKFLPDLIIVDLRMPPMNGFELLKILKENEELKKIPVIVISGDRSPEVEKKALEAGANAYVPKPFSIKELLEIAKKLLN
1804	MKSVLVVDDSETLNKIITFALESEGLKVVLAPNGKAALEKLKKFKPDLIIVDLNMPPMNGLELLKILKNDEELKKIPVVVLSLDRSPEVEKKCLELGANKYIPKPFSIKELMEVVKKLLN
1805	MKSILLVDDSETLSKIIKFALEKEGYTVILAPNGKEALKKLEKSLPDLIICDLEMPPMNGYELLKILKENEKLKKIPVVVLSKDRSEEVKERCLELGASKYVPKPFSIEELMKIVKKLLE
1806	MKSILLVDDSETLRKIISFALESKGYKVVYAPNGIEALEKLKEFLPDLIIVDLRMPLMNGLELLRILKENEELKNIPVIVLSRDRTPEVEKEALEAGANAYVPKPFSIKELMEIVEKMLN
1807	MKSVLVVDDSETLRKVITFALEKEGYSVVLAPDGKEALKKLEKFTPDLIIVDLRMPKMNGFELLKRLKEDEELRKVPVIVLSADRSPEVEEEALKLGANAYIPKPFSIQELIEVAKKLLN
1808	MKTVLLVDDSETLRKIISFSLESEGLKVIYAPNGKEALEKLEEFLPDLIIVDLRMPPMDGLELLRRLAEDPELREVPVLVLSGDRDPEVEQEALEAGASAYIPKPFSIEELMEVVKKLLE
1809	MKTILLVDDSETLRKVISFALKSKGYKVIYAKDGIEALEKLKEFLPDLIIVDLRMPKMNGFELLKILKNDEKLKNIPVVVLSRDRDPEVEEKALELGANKYIPKPFSIKELIEVVEKLLN
1810	MKSVLLVDDSETLRKVIKFGLESKGYSVVEAKNGKEALEKLKEFLPDLIIVDLRMPLMNGYELLKILKNDPKLRKIPVIVISGDRDPEVKERALKLGANYYVPKPFSISELLKIIEKLLN
1811	MKKVLLVDDSETLSKIISFALESRGYEVIFAPNGKEALEKLKEFLPDLIIVDLSMPPMNGFELLKILKNDEKLKNIPVIVISRNRDPEVEKKALELGANAYVPKPFSIKELMEIAEKLLN
1812	MKSVLLVDDSEVLSKIISFALKSEGYTVILAKNGIEALEKLKKFLPDLIIVDLRMRPMNGFELLKILKEDEKLKNIPVIVLSGDRSPEVEQKALELGANKYIPKPFSIKELIEVAKKLLN
1813	MKSVLLVDDSETLRKIISFALESEGYSVVYAKNGKEALKKLEEFLPDLIILDLRMPPMNGFELLKILKNNEKLKKIPVIVLSLDRDPEVKERALKLGANAYIPKPFSISELIKEAKKLLN
1814	MKSVLLVDDSETLRKIIKFSLESEGYKVIEAKDGVEALEKLKEFLPDLIIVDLRMPKMNGFELLKILKNDEELKNIPVIVISGDRSPEVKEKCLKLGANYYVPKPFSIKELMEIAKKLLN
1815	MKTVLVVDDSETLRKIITFALESKGYKVVLAKDGIEALKKLKEFLPDLIIVDLNMPKMNGYELLKILKNDEELKKIPVIVLSRNRDEEVKKKCLELGADKYIPKPFSISELIEVVEELLN
1816	MKSVLVVDDSETLRKIITFALEKKGYTVRLAPNGRAALELLEEFLPDLIIVDLRMPPMDGFELLRRLREDPELREVPVVVLSGDRDPEVEERALELGADKYIPKPFSISELMEVVEKLLN
1817	MKSILLVDDSETLRKIISFALEKRGYSVVLARNGKEALEKLKKFLPDLIIVDLRMPPMNGFELLKILKNDEKLKKIPVIVLSGNRDPEVEERCLKLGANAYIPKPFSIKELMEVAEKLLN
1818	MKTVLVVDDSETLRKIITFAIEKEGYKVVLAKNGIEALEKLKEFLPDLIIVDLNMPPMNGFELLKILKNDEKLKEIPVVVLSGDRSPEVEKKALELGANAYVPKPFSIKELMEIIKKLLN
1819	MKSVLLVDDSETMNKIIKFGIEKEGYKVILAPNGIEALEKLEKFLPDLIIVDLSMPKMNGYELLKILKENEKLKNIPVIVISGNRDPEVEERALELGANAYVPKPFSIEELMKIIKKLLN
1820	MKSVLLVDDSETLRKIISFALEKRGYSVVYARNGKEALEKLKEFLPDLIIVDLRMPPMDGFTLLEILKNDPKLKKIPVVVLSRDRDPEVEKRALEAGANAYVPKPFSIEELMEIVEKLLN
1821	MKSVLLVDDSETLRKVISFALEKKGYTVVYAPNGKEALEKLEKFLPDLIIVDLRMPPMDGLTLLKILAENPELKKIPVIVLSADRDPEVEKEALEAGASAYVPKPFSIKELIEIAEKLLN
1822	MKTVLLVDDSETLSKIIKFALEKEGLKVVLAKDGKEALEKLKEFLPDLIICDLSMPKMNGYELLKILKNDEKLKEIPVIVLSADRSEEVKERALELGANKYVPKPFSIEELMEIAKKLLE
1823	MKKVLLVDDSETLRKIISFALEKEGYKVVFAKNGKEALEKLKKFKPDLIIVDLSMPPMNGFELLKILKEDEELKEIPVIVLSRDRSPEVEKKCLELGANAYVPKPFSIEELMKIVKEKLN
1824	MKKVLLIDDSETLRKIISFALESRGYKVIYAPNGKEALEKLEEFTPDLIILDLSMPPMNGLEVLKILKNNEKLKNIPVIVISADSSPEVEKEALEAGANYYVPKPFSIQELMEVAEKLLN
1825	MKSVLLVDDSETLSKVITFALESEGYKVVLAKDGIEALEKLKKFLPDLIILDLRMPKMNGFELLKILKNNEKLKKIPVVVLSGDRSPEVEKECLELGANKYIPKPFSIKELMKVVKELLN
1826	MKKILLVDDSKTLQKIISFALKSEGYEVIFAPNGKEALEKLEEFLPDLIIVDLRMPPMNGYELLKKLKNDEKLKEIPVIVISLDRDPEVKEKCLELGANAYIPKPFSISELMEVVKKLLN
1827	MKKVLLVDDSETLSKIISFALEKEGLKVVLAKNGKEALKKLEKFLPDLIIVDLRMPPMNGLELLKILKEDEKLKKIPVLVLSLDRDPEVEQRCLELGADKYVPKPFSIKELMEVVKKLLN
1828	MKKILLVDDSKTLRKIIKFALEKRGYEVVEAPNGKEALKKLEKFLPDLIILDLNMPPMNGYEVLKILKNDEKLKNIPVIVLSLDRTPEVEEKALELGANAYVPKPFSIKELMEIVEKLLN
1829	MKSVLLVDDSETLRKVISFALESEGYSVVLAPNGKEALEKLKEFLPDLIIVDLRMPPMDGLTLLEILRNDPELRKIPVIVLSGDSDPEVRERCLEAGADAYVEKPFSISELMEIAKKLLS
1830	MKSVLLVDDSETLRKVISFALKSEGYTVVEAKNGIEALKKLKEFKPDLIIVDLRMPPMNGFELLKILKNDEELKNIPVLVVSLDRSEEVKKEALEAGADAYVPKPFSIKELLEIVKKLLN
1831	MKSVLVVDDSETLRKIITFALESEGYTTVLAPNGVEALKKLEEFLPDLIILDLRMPLMNGYEVLKILKNDPKLKDIPVIVLSGDRDPEVEKKCLELGANAYVPKPFSISELMKIAKELLN
1832	MKSVLVVDDSEVLRKIITFALKSKGYSVVLARNGVEALEKLEEFLPDLIIVDLSMPPMNGRELLRRLAEDEPLRDVPVIVLSRNRDPEVEEEALALGARAYIPKPFSIEELLKVAEELLN
1833	MKSILLVDDSKTLRKIITFALEKEGYSVIEAPNGKEALEKLKESLPDLIIVDLDMPPMNGLELLKILKEDEKLRKIPVVVLSRNRDPEVEQQALEAGADAYVPKPFSIKELIEIVKKLLN
1834	MKKILLVDDSEVLSKIITFALKKEGYEVVLAKDGKEALEKLKKFLPDLIILDLRMPPMDGFTLLEKLKNDEKLKKIPVVVISADRDPEVKERALKGGANYYIPKPFSIKELMEVVKKLLN
1835	MKSILLVDDSETLRKVISFALESRGYKVVLAPDGVEALEKLKEFLPDLIIVDLSMPKMNGLELLKVLKNDEKLRKIPVVVLSGDRSPEVEKRCLEAGADAYVPKPFSIQELMEIVEKLLN
1836	KKSVLLIDDSETLRKVISFGIESRGYSVVLAKNGIEALEKLKKFLPDLIIIDLRMPPMNGLEVLKILKNDEELRNIPVIVLSLDRSPEVKKKALEAGANAYIPKPFSIKELMEVIDKLLN
1837	MKSILLVDDSETLRKIISFVLEKEGYKVTFAKNGKEALKKLEEFLPDLIIVDLSMPPMNGYELLKILKEDEKLKKIPVVVLSADRDPEVEERCLELGANAYVPKPFSLKELMEIVKKLLE
1838	MKSVLLVDDSETLRKIISFALESEGYSVVLAPNGKEALEKLKEFLPDLIIVDLSMPPMNGYELLKILKNDPELKKIPVVVLSKDSDPEVEQRCLELGANAYIPKPFSIKELIKTIKKLLN
1839	MKSVLLVDDSETLSKIITFALEKEGYKVILAPDGIEALKKLEKELPDLIIVDLSMPKMNGFELLKILKNDEKLKKIPVIVLSKDSDPEVEKKALELGADKYVPKPFSISELMEIAKKLLN
1840	MKSVLLVDDSETLQKVISFALEKEGLSVVRAKNGVEALKKLEEFLPDLIIVDLRMRPMDGFELLRKLKEDEKLRKIPVVVLSGDRDPEVEERALEGGADAYIPKPFSIKELMEVVKKLLE
1841	MKSVLLVDDSETLRKIISFGLESEGYTVTYAPNGIEALEKLKKFLPDLIILDLSMRPMNGFELLEILKNDEKLKKIPVVVLSADRDPEVEEKALKLGANKYIPKPFSIEELMKVVKELLE
1842	MKSVLLVDDSEVMRKIISFALEKRGLSVIYAPNGKEALEKLKESLPDLIIVDLRMPPMNGFELLKILKNDEKLKNIPVVVLSADRDPEVKEKCLELGANKYIPKPFSIEELMKVVEELLN
1843	MKSILLVDDSETMQKIISFALKSRGYSVVFAPNGVAALEKLKKFLPDLIILDLNMPPMNGLEVLRILKNDPKLRKIPVLVLSLDRDPEVEQECLEAGADKYIPKPFSIEELMKVVEELLN
1844	MKKVLLVDDSETLRKIISFALKSEGLEVIEAPNGKEALEKLKEFLPDLIIVDLRMPPMDGFELLKILKEDEKLRKVPVVVLSGDRDEEVKKECLELGADAYIPKPFSIKELMEVVKKLLE
1845	MKTVLLVDDSETLRKIISFALEKEGWKVIFARNGVEALEKLEEFLPDLIIVDLRMPPMNGLELLRRLKEDPKLREIPVIVLSSDRDPEVEERALAAGADAYVPKPFSIQELIEVAKKLLN
1846	MKTILLVDDSETMQKIISFGIEKRGYKVIRAPDGIEALEKLKEFLPDLIIVDLSMPKMNGLEFLKILKEDEELKKIPVVVLSADRSPEVEKKCLELGADAYIPKPFSISELMEVIDKLLN
1847	MKTVLLVDDSETLRKIISFALEREGYKVIFAKNGIEALEKLKEFLPDLIIVDLSMPKMNGFELLRILKEDEKLKNIPVIVLSADSSEEVKEECLELGANKYINKPFSISELIKVAKELLN
1848	MKSVLLVDDDEVLRKVISFALESRGYKVVLAKDGIEALKKLEKFLPDLIICDLRMPKMNGYELLKILKNNEKLKEIPVVVISRDRSPEVREKALELGAHKYVPKPFSIEELMKIIEELLN
1849	MKTVLVVDDSETLRKVITFALEKEGYKVILAPNGKEALEKLKKQTPDLIIVDLSMPPMNGFELLKILKNDEKLKNIPVIVLSLDRDEEVKKKALELGANAYIPKPFSIKELMEVVKKMLN
1850	MKSILLVDDSETLAKVISFALESRGYTVTLAKNGKEALEKLKKSLPDLIIIDLRMPIMNGFELLKILKNDEKLKKIPVIVLSGDRDPEVKKEALEGGASAYIPKPFSIQELMEVADKLLN
1851	MKKILVVDDSETLRKVITFALESKGYKVILAKNGVEALKKLEKELPDLIIVDLNMPPMNGLELLKKLKEDEKLKNIPVIVLSGDRSPEVEKECLEAGANAYIPKPFSIKELVEVIEKLLN
1852	MKKVLLVDDSETLQKIISFALESEGLEVIKAPNGIEALKKLEKELPDLIIVDLRMRPMNGFELLEKLKNDEKLKDIPVIVLSSDRDPEVEERCLKAGANAYVPKPFSIKELMEIVKKLLN
1853	MKTVLLVDDSETLRKIISFALESEGLKVVFAPDGVEALEKLKEFLPDLIIVDLNMPKMDGFELLRILKEDEELKKIPVIVISRDRTPEVEKKALELGANAYIPKPFSIEELMEVVKKLLE
1854	MKKILVVDDSETLRKIITFALESKGYEVILAPNGIEALEKLKEFLPDLIIVDLSMPPMNGLELLKILKNNEKLKKIPVVVISKDRSPEVKEKALKAGANKYIPKPFSIQELIEVVEKLLN
1855	MKSVLLVDDSETLSKIISFALESEGLTVTLARNGKEALKKLEKELPDLIIVDLAMPPMNGFELLKILKEDEELKKIPVVVLSADRSPEVEKEALELGADKYVPKPFSIKELMEVVKELLE
1856	MKTILLVDDSETLRKIISFAIEKEGYKVIFAKNGKEALEKLKEFLPDLIIVDLSMPIMNGFELLEKLKNDEELKKIPVIVLSRNRDPEVKERCLKLGANKYIPKPFSISELMEEIKKLLN
1857	MKSILLVDDSETLRKVIKFAIESKGYKVVTAPNGIEALEKLKEFLPDLIIVDLSMPPMNGYELLKILKNDEKLKKIPVIVISGDRDPEVEKKALELGANKYVPKPFSIEELMKIIEELLN
1858	MKKILLVDDSETLSKIISFALKKEGYEVVFAKNGKEALEKLKEFLPDLIIVDLRMRPMNGEELLKILKEDEKLKKIPVVVVSGDRDPEVEERALELGADAYVPKPFSIKELMEIVKKLLN
1859	MKSVLLVDDSETLRKVIKFALEKKGYTVVEAKNGIEALKKLKEFLPDLIIVDLSMPPMNGLELLKILKNDEKLKKIPVIVLSLDSDPEVKEECLKAGANKYIEKPFSIQELMKEVEKLLN
1860	MKSVLLVDDSETLRKIISFALKSEGLSVIYAKNGIEALKKLEKFLPDLIIVDLRMPPMNGYELLKKLKEDEKLKNIPVIVLSADRSPEVEKRALELGANAYIPKPFSIEELMKVAKKLLN
1861	MKSVLLVDDSEVLSKVISFALESEGYTVVKAPDGIEALKKLEEFLPDLIIVDLSMPKMNGFELLKVLKEDEKLRKIPVIVLSKDRSEEVKKECLELGADKYVPKPFSISELIKIAKELLE
1862	MKSVLLVDDSETLRKIISFALEKKGYKVTFAPNGKEALEKLEEFTPDLIIVDLRMPPMNGFELLKILKNDEKLKNIPVIVVSGDSSPEVEKKALELGANAYVPKPFSIEELMEIAEKLLN
1863	MKSILLVDDSETLRKIISFALESKGYTVVFAKDGVEALKKLEEFLPDLIIVDLSMPKMDGLELLKRLKEDPELKEVPVIVLSADRSEEVKEKCLELGANAYIPKPFSIEELMKVVEELLN
1864	MKSILLVDDSETLRKIIKFALEKEGYKVIEAKNGKEALEKLKKFLPDLIIVDLDMPPMNGFELLKKLKNDEKLKNIPVIVLSRDRSEEVKEKALELGADAYVPKPFSIKELMEIVKKLLN
1865	MKSVLLVDDSETLRKIISFAIESEGYSVIFAPNGIEALEKLKEFLPDLIILDLRMPPMNGYELLKKLKEDEKLKKIPVVVISGDRDPEVEERALELGANAYVPKPFSISELMKIIKELLN
1866	MKKILLVDDSETLSKIISFALEKEGYKVIFAKDGIEALKKLEEELPDLIIVDLSMPKMNGFELLKKLKNNEKLKEIPVIVLSSDRDPEVKEKALELGANKYIPKPFSIEELMKVVKELLN
1867	MKKVLLVDDSETLRKIISFALESRGYSVIFAENGIEALEKLKEFLPDLIILDLSMPKMNGLEVLKILKNDEELKKIPVIVLSGNRDEEVKEKALKAGANAYIPKPFSIKELMEVAEKLLN
1868	MKTVLLVDDSETLRKIISFALEKEGYKVIYAPNGIEALKKLEEFLPDLIIVDLSMPPMNGYELLKILKEDEKLKNIPVIVLSGDSSPEVEKKCLELGANYYIPKPFSISELMKVAKKLLN
1869	MKSVLLVDDSETLTKIIKFALESRGYTVTTAPNGKEALEKLKEFTPDLIIVDLSMPPMNGYELLKILKNDEKLKNIPVVVLSLDRSPEVEKKCLELGADYYVPKPFSIQELMEVVDKLLN
1870	MKSVLLVDDSETLRKIISFALESEGYSVIYAPNGIEALKKLKEFLPDLIIVDLSMRPMNGLELLKILKNDEKLKNIPVIVLSLDSSEEVKEKCLEAGANAYIPKPFSIKELIEVAKKLLN
1871	MKKILVVDDSEVMNKIITFALKSEGYEVVLAKNGIEALKKLEKFLPDLIIVDLSMPPMNGLELLKILKEDEKLKKIPVIVLSTNSDPEVEKKCLEAGANAYIPKPFSIKELIETAKKLLN
1872	MKSVLLVDDSETLNKIITFALESEGYTVKLAKNGIEALKKLEEFLPDLIIVDLNMPPMNGFELLKILKNNPELKNIPVIVLSTDRSEEVKEECLKLGANKYIPKPFSIEELMKVVKELLN
1873	MKKVLLVDDSKTMSKIITFALESEGYSVILAPNGIEALKKLEKFLPDLIIVDLNMPPMNGFEFLKILKNDEKLKEIPVVVLSADRSEEVKERALEAGANAYIPKPFSIEELMKVVKKLLN
1874	MKSVLLVDDSETMRKIIRFALESRGYTVVEAPNGKEALEKLKEFLPDLIIVDLNMPPMNGRELLKILKNDEKLKNIPVIVLSADRSPEVEKECLELGADKYIPKPFSIKELLEVAEELLN
1875	MKSILLVDDSETLRKVISFGLEKEGYKVILAKNGKEALEKLKKSLPDLIIVDLRMPPMNGLELLEILKNDPELKKIPVVVISLDRSPEVEEKCLKAGANKYVPKPFSIEELMKIVKELLN
1876	MKTILLVDDSETLSKIISFALESEGYKVIRAKDGKEALEKLEKFLPDLIIVDLNMPPMNGFELLKILKNNEKLKNIPVIVLSKDRSPEVEKRALELGADAYIPKPFSIKELMEVVKKLLN
1877	MKKILLVDDSETLRKIISFALESKGYSVVFAKNGIEALKKLEEFTPDLIIVDLNMRPMNGYEFLKILKNNEKLKKIPVIVLSADRSPEVEEKALKLGADKYIPKPFSIEELMKVVEELLN
1878	MKSVLLVDDSETLRKIIKFTLESEGFTVVEAPNGKEALEKLEKFLPDLIIVDLRMPPMNGRELLKKLKEDEKLKNIPVIVLSGDTDPEVEKEALELGANAYVPKPFSTKELMEIAKKLLN
1879	MKSVLLVDDSETLNKIISFALKKRGYSVVLAKNGKEALEKLKEFKPDLIILDLRMPPMNGFELLKKLKNDEELRNIPVIVLSADRTPEVEKEALELGADKYIPKPFSIEELMKVAEELLN
1880	MKSILLVDDSETLSKIIKFALEKKGYKVVLAPDGVEALKKLEKFTPDLIILDLRMPKMNGLELLKILKNNEKLKKIPVIVLSGDRDPEVEKECLEAGADKYIPKPFSIEELMEVVEKLLN
1881	MKKVLLVDDSETLRKIISFILESEGYEVVTAPDGKEALEKLEEFRPDLILVDLRMPLMDGFTLLEILANDEELREIPVIVISRDRSPEVEKRALEAGADKYIPKPFSPRELLKVAKELLE
1882	MKTVLLVDDSETLRKIIKFALEKEGYSVIEAPNGKEALEKLKKFLPDLIIVDLSMPPMNGFELLKILKEDEKLKKIPVIVLSLDRSPEVEKKALEGGANYYIPKPFSISELIEVAKKLLN
1883	MKSVLLVDDSEVLRKIIKFALESEGYTVVEAPNGKEALEKLKEFLPDLIIVDLRMRPMNGFELLKILKNDEKLKNIPVIVISGDRTPEVEKKALELGANKYIPKPFSIKELMKVAKELLN
1884	MKSVLLVDDSEVLNKVITFALESEGYKVTLAPDGKAALEKLKEFTPDLIIVDLRMPKMDGFTLLETLKNDEKLKNIPVIVLSLDRDPEVEEKCLKLGADKYVPKPFSIEELIKVAKELLN
1885	MKSVLVVDDSETLRKVITFALESRGYTVILAKNGKEALEKLKEFKPDLIIVDLSMPPMNGLELLKILKENPELKNIPVIVLSRDRSPEVEKECLEAGADKYIPKPFSIKELMEVADKMLN
1886	MKKILLVDDSETLRKIISFALKSKGYEVVEAKDGKEALEKLKEFLPDLIIVDLRMPKMNGFELLKKLKNDEELKKIPVVVLSADRDPEVEKKALELGADKYVPKPFSIKELMEVVEELLN
1887	MKSILLVDDSETLRKIISFALESEGYKVVFAKDGKEALKKLEKFTPDLIIVDLSMPPMNGYELLKKLKNDEKLKKIPVVVLSLDRSPEVKEKALELGANAYIPKPFSIKELLEVVKKLLE
1888	MKSVLLVDDSETMRKIITFALEKEGYTVVTAPNGVEALEKLKKFLPDLIIVDLSMPPMNGYELLKILKEDPELKKIPVIVLSLDRDPEVEKRALELGADKYVPKPFSISELIKIAKELLE
1889	MKSVLLVDDSETLRKIIEFALKKKGYKVVRAPNGIEALKKLEKFLPDLIILDLSMPPMNGFEVLKILKNNEELKKIPVIVLSADRSPEVEKEALELGANKYVPKPFSIEELMEIAEKMLN
1890	MKKILLVDDSETLRKIISFALEKEGYEVILAPNGKEALEKLKEFLPDLIIVDLSMPPMNGFELLKILKNDPKLKNIPVVVLSGNRDPEVEKKALELGANAYVPKPFSIEELMKIVKELLN
1891	MKSVLVVDDSETLQKIITFALEKEGYSVVRAKDGIEALKKLEKFLPDLIIVDLNMPKMNGFELLKKLKEDPELKNIPVIVLSGNRDPEVEKKALELGANYYVPKPFSIKELLEVVKKLLN
1892	MKSVLVVDDSETLRKIITFALESEGWTVVEAKDGKEALEKLKEFKPDLIIVDLSMPIMNGFELLKILKENEELKNIPVIVLSADRSPEVEEKALKLGANKYIPKPFSIEELIKVAKELLN
1893	MKSVLLVDDSEVLQKIISFALKSKGYKVIFAPDGKEALEKLKEFTPDLIIVDLRMRPMNGFELLKILKNDEKLKKIPVIVISADRTPEVEKKALELGANKYIPKPFSIEELMKEVEKLLN
1894	MKSILLVDDSETLRKIISFALEKKGYTVVLAPDGVEALEKLKKSLPDLIILDLSMPKMDGLTLLRELKNDEKLKKVPVIVLSLNRDPEVEELCLKAGADKYIPKPFSIKELMEVVEKLLN
1895	MKSILLVDDSETLSKIISFALESEGYTVVLAPDGKSALEKLKEFLPDLIIVDLLMPPMNGLELLKILKNDEKLKKIPVIVISKNRDPEIKEKCLEAGANAYVPKPFSIEELIEIVKKLLN
1896	MKSILLVDDSETLRKVISFALEKEGYKVIFAKNGKEALEKLEEFLPDLIIVDLRMPPMNGYELLKILKNNEELRNIPVIVLSGDSSPEVKERALELGANAYVEKPFSIEELIEIAKKLLE
1897	SKSVLLVDDSETLAKIITFALESRGLTVTRAPDGRAALAALAERLPDLIIVDLRMPPMDGLALLRRLAADPALREVPVLVLSADRDPEVEQRALEAGADAYVPKPFSIEELMAVVEELLT
1898	MKKILLVDDSETLRKIISFAIESKGYEVIFAPNGIEALEKLKKELPDLIIVDLSMPKMDGLELLKILKEDEKLKKIPVIVLSRNRDPEVEKKCLEAGANKYVPKPFSISELMKIIEELLN
1899	MKSVLLVDDSETLSKIISFALEKKGYTVVFAPNGIAALEKLKEFLPDLIICDLSMPPMNGLELLEILKNDPELRNIPVIVLSADRDPEVKQRCLEAGANYYIPKPFSIKELMEVAEKLLN
1900	MKTVLLVDDSETLSKIITFALESRGYKVILAKNGIEALKKLEKFLPDLIIVDLRMPPMNGFELLKKLKNDPKLKKIPVVVLSGDRSPEVEERCLELGADAYVPKPFSIKELMEIVEKLLN
1901	MKKVLLVDDSETLRKIISFAIEKEGYSVVYAPNGIAALKKLEEFLPDLIILDLRMPPMNGLEVLKILKENPKLKKIPVVVISGDRDPEVKEEALKAGADAYIPKPFSIEELMKVIKKLLN
1902	MKSVLVVDDSETLRKIITFALESEGYTVVLAPNGKAALEKLKEFLPDLIILDLSMPVMNGFEVLKILKNDEKLKKIPVIVLSGDRDPEVEEEALELGADAYIPKPFSIKELIEVAKKLLE
1903	MKSILLVDDSETLRKIISFALKSEGYTVTFAPNGKAALEKLKEFRPDLIILDLNMPPMNGLEVLKRLKEDEELREIPVVVLSADRDPEVEKEALEAGANKYIPKPFSIQELIKVIKELLE
1904	MKSVLLVDDSEVLSKIISFALESEGYTVVFAPNGKEALEKLKEFLPDLIIVDLSMRPMNGFELLKIIKEDEKLKKIPVIVLSGNRDPEVEKKALELGADKYIPKPFSIKELIKEAKKLLN
1905	MKSVLLVDDSETLRKVISFALEKEGLTVTLAPDGRAALEKLRKSLPDLIIVDLSMPPMNGLELLRILREDPELREVPVIVLSGDRDPEVEEEALRAGADAYIPKPFSIEELMEVAKKLLN
1906	MKSVLLVDDSETLQKIISFALEKEGLTVIRAPNGKEALEKLKEFLPDLIIVDLNMPPMNGFELLKKLKNDEKLRDIPVVVLSLDRDPEVEKKALELGANKYVPKPFSIKELMKIVKELLE
1907	MKSILVVDDSETLNKVITFALESRGYTTILAPNGIEALEKLKKQKPDLIIVDLDMPPMNGFELLKILKNDEELKNIPVVVLSRNSDPEVEQKALELGANAYVPKPFSIKELMEIIDKLLN
1908	MKSVLLVDDSETLRKVISFALKSEGYSVVFAPNGIEALEKLKEFLPDLIIVDLSMPPMNGLELLKILRENPELKKIPVLVLSKDRDPEVEKKCLELGANKYIPKPFSIKELMEVVKELLN
1909	MKSILLVDDSETLSKIISFGLESRGYTVTLAKDGIEALEKLKKFLPDLIILDLSMPKMNGYEVLEILKNDPELKKIPVIVLSKNRDPEVEERALKLGADAYVPKPFSIQELMEIVEKLLN
1910	MKKVLLVDDSEVLSKIISFALESEGLEVVLAPNGKEALKKLEKFLPDLIIVDLSMPPMNGLELLKILKEDEKLKNIPVVVLSGDRDPEVEKECLEAGANAYVPKPFSIKELMEIVKKLLE
1911	MKSVLLVDDSETLRKVISFALESKGYTVTYAPNGKEALEKLKESLPDLIIVDLRMPPMNGYELLKILKEDPELKKIPVVVLSGDRSPEVEERALKLGANAYIPKPFSIKELLEVVEKLLN
1912	MKTVLLVDDSETLRKIISFALESKGYKVIYAPNGKEALEKLKKFKPDLIIVDLNMPPMNGFELLKILKEDEELKKIPVVVLSADRDPEVKEKCLELGANKYVPKPFSIKELMKIVEELLN
1913	MKSVLLVDDSETLRKVISFAIESRGYTVVYAKDGKEALEKLKEFLPDLIIVDLSMPKMNGFELLKILKNDEKLKNIPVIVLSLDRDPEVEKRALELGANKYVPKPFSIKELMEEIEKLLN
1914	MKTILLVDDSETLRKIISFALESEGYKVIYAKNGIEALEKLKKFLPDLIIVDLRMRPMNGFELLKILKNDEKLKNIPVIVLSKDRDPEVEKKCLELGANKYVPKPFSIKELMEIAKELLE
1915	MKSILLVDDSETLRKVISFALEKKGYKVTLAKNGKEALEKLKEFTPDLIIVDLSMPPMNGFELLKILKNDEKLKKIPVIVLSGNRDPEVEKKALEAGANKYIPKPFSIKELMEVVEKMLN
1916	MKSVLLVDDSETLSKVISFALKSKGYTVIFAPDGIEALKKLKEFLPDLIIVDLRMPKMDGFELLKILKEDEELKKIPVVVLSGDRSEEVKEKALELGANAYIPKPFSIKELMEVVEKLLN
1917	MKKILLVDDSETLRKIIKFALEKEGYEVIEAPNGIEALEKLKEFLPDLIILDLRMPPMNGLEVLKILKNDEKLKKIPVLVLSADRSPEVEKKALEAGANAYIPKPFSIKELMETVKKLLN
1918	MKKILLVDDSETLSKIISFALESKGYSVIRAKNGIEALKKLKEFLPDLIILDLRMPPMNGFEVLKILKEDEKLKNIPVVVVSADRDPEVEKEALELGANAYVPKPFSIEELMKIVEKLLN
1919	MKKVLLVDDSETLNKIISFALESEGYSVVLAPDGVEALEKLKEFLPDLIIVDLSMPKMNGFELLKILKENEELKKIPVVVLSADRDPEVEERCLELGADKYVPKPFSIKELIEIVKKLLN
1920	MKKVLLVDDSETLRKIISFALESKGYEVIFARNGKEALEKLKEFLPDLIIVDLSMPPMNGFELLRELKNDEKLRDIPVIVLSKDRSPEVEQRCLEAGANAYIPKPFSIEELMKVVEKLLN
1921	MKSVLVVDDSETLNKIITFALEKEGYTVTLAPNGIAALEKLKEFLPDLIILDLRMPPMNGFEVLKILKEDEELKKIPVVVLSLDRDPEVEKEALELGANAYVPKPFSIKELMEIVKKLLE
1922	MKSVLLVDDSETMAKIISFALEKKGYTVTFAPNGKEALEKLKEFTPDLIICDLRMPPMNGFEFLKILKENEELKKIPVIVLSTDSSPEVREKALELGANKYIPKPFSIKELMKVVEELLN
1923	MKKVLLVDDSETLRKIISFALESRGYSVIYAPNGKEALKKLEEFTPDLIILDLRMPIMNGEEVLKILKENEKLRKIPVVVLSGDSSPEVEERALKLGADAYVPKPFSIKELMEIVEKLLN
1924	MKSILLVDDSETLRKIIKFALESEGYTVIEAKDGKEALEKLKKELPDLIIVDLRMPPMNGFELLKILKENEELKNIPVVVLSLDRSPEVEEKALEAGANKYIPKPFSIKELMAVVKELLN
1925	MKKVLVVDDSETLRKVITFALEKEGLKTILAKNGKEALEKLEKFLPDLIIVDLRMPPMNGYELLKILKENPELKKIPVIVLSGDRSPEVEKKCLELGANAYIPKPFSIEELMKKVKELLE
1926	MKSVLLVDDSETLRKIISFALEKEGYTVVLAPNGIEALKKLKEFLPDLIICDLSMPPMNGLEFLKILKEDEKLKNIPVIVLSGDRDPEVEEKCLEAGADKYVPKPFSIKELMKIAKELLN
1927	MKSVLLVDDSETLQKIISFALESRGYTVVRARNGIEALEKLKEFLPDLIIVDLRMRPMDGFELLKILKNDEKLKEIPVIVLSADRDPEVKEKALKAGANAYIPKPFSISELMEVVEKLLN
1928	MKSILLVDDSETLQKIISFALEKEGYKVIFAPDGIEALEKLKEFLPDLIIVDLRMPKMNGFELLKILKNDEKLKKIPVIVLSLDRSPEVEQKALEAGANAYVPKPFSISELMEIVKKLLN
1929	MKSVLVVDDSETLNKIITFALESEGYTVILAKDGIEALKKLEKFLPDLIIVDLRMPKMNGFELLRILKNNEELKKIPVIVLSADRSPEVEQRALELGANAYIPKPFSIKELIEVAKKLLN
1930	KKKILLVDDSETLRKIIKFALESKGYEVIEAKNGIEALEKLKEFLPDLIICDLNMPPMNGLELLKILKNDEKLKNIPVIVLSADRDPEVEKECLEAGANKYVPKPFSIKELIEIVEELLN
1931	MKSVLLVDDSEVLRKIISFALESEGWEVTFAPNGIEALEKLKEFTPDLIILDLSMPKMNGFELLKILKNDEKLKNIPVIVLSLNRDPEVEKKALEAGANKYIPKPFSIKELIKVAKELLN
1932	KKKVLLVDDSETLAKIITFALKSEGYEVVLAKDGKEALEKLEKFLPDLIIVDLSMPKMNGFELLKKLKNDEKLKKIPVIVVSGNSDPEVEKKCLELGADKYIPKPFSIKELIKEAKKLLN
1933	MKTVLLVDDSETLNKIIKFSIEKEGYKVVLAPNGKEALEKLKEFLPDLIIVDLNMPPMNGFELLKILKEDEELKKIPVIVLSGDRSPEVEKEALELGANKYIPKPFSIEELMKEIEKLLN
1934	MKSILLVDDSETLRKVISFALKKEGYKVVFAPDGKEALEKLEKFLPDLIILDLSMPPMNGLELLKKLKNDEKLKNIPVIVLSGDSSEEVKKKALEAGANAYVEKPFSIEELMKIVKKLLN
1935	MKSILLVDDSETLRKVISFAIESKGYTVVYAPNGKEALEKLKEFLPDLIILDLRMPPMNGFEVLKILKNDPELKKIPVLVLSADRDPEVEKECLELGADKYIPKPFSITELMKEIEKLLN
1936	MKTILLVDDSETLRKVISFALEKEGYKVVFAPDGIEALEKLKKFTPDLIIVDLNMPKMNGFELLKILKNDEKLKKIPVIVLSLDRSPEVEKKCLELGADYYIPKPFSIKELIEVVKKLLN
1937	MKSVLLVDDSETLRKIISFALESEGLSVTFAPNGKEALEKLEEFLPDLIIVDLSMPLMNGFELLKKLKEDPKLKEIPVIVLSGNRDPEVEKRALELGANKYVPKPFSIKELMEIVKELLN
1938	MKKVLLVDDSKVLRKIIKFALEKEGYEVIEAPDGIEALEKLKEFLPDLIIVDLRMPKMNGYELLKILKNDEKLKKIPVIVLSTDRDPEVEKKALELGADKYIPKPFSIKELMKVAKELLN
1939	MKSVLLVDDSETLRKIISFALEKEGLKVVFAKNGKEALEKLKEFLPDLIIVDLRMPLMNGYELLKILKNDEKLKEIPVLVISGDRDPEVEKECLELGANAYVPKPFSIEELMKIVKKLLN
1940	MKSVLLVDDSETLRKIISFALEKEGLKVVLAKDGIEALEKLKEFLPDLIIVDLNMPKMDGYTLLEILKNNEELKKIPVIVLSRDRTEEVKKRCLELGANAYIPKPFSIEELMEVVKKLLE
1941	MKTVLLVDDSETLRKIISFALEKEGLKVVFAKNGKEALEKLEEFLPDLIIVDLDMPPMNGFELLKKLKNNEELKKIPVVVLSGNRDPEVEEECLKLGANAYIPKPFSIKELMEVVKKLLE
1942	MKSVLLVDDSETLRKIISFALEKEGLSVTLAPNGKAALEKLKEFLPDLIIVDLNMPPMNGLELLKILKEDEKLKNIPVIVLSLNRDPEVEEKCLKLGANKYIPKPFSIKELMEVAKKLLN
1943	MKKVLLVDDSETLRKVISFALEKKGYEVVLAKNGKEALEKLKKFLPDLIIVDLRMPVMDGFELLKILKNDEKLKNIPVVVLSGDSTEEVKKKALELGANKYIPKPFSIEELMKVVEELLN
1944	MKKVLLVDDSETLRKIIKFAIEKEGYEVIEAPNGKAALEKLKKFLPDLIIVDLSMPPMNGFELLKILKEDEKLREIPVIVLSANRDPEVEQKALEAGANAYIPKPFSISELMKKIKELLE
1945	MKSVLLVDDSETLRKVISFALEKEGYTVTFARNGKEALEKLKEFLPDLIIVDLRMPPMNGLELLKELKNDEKLKKIPVIVLSLDRDPEVEKEALEAGANAYIPKPFSIKELIEVAKKLLE
1946	MKKVLVVDDSETLRKVITFALKSKGYEVIEAKDGIEALEKLKKFLPDLIILDLRMPKMNGYELLKILKEDEKLKKIPVVVLSADRDPEVEKKCLELGANKYIPKPFSIEELMKVVEELLN
1947	MKSILLVDDSEILRKVISFILEKEGYTVVLAKDGIEALEKLKEFLPDLIIVDLRMPKMNGLELLKILKEDEKLKKIPVIVLSGDSDPEVEEKCLKAGADKYIPKPFSPKELMEVVKELLN
1948	MKSVLLVDDSETLRKIISFALESKGYKVVYAPNGKEALEKLKKFTPDLIIVDLRMPLMNGFELLKILKNDEKLKEIPVVVLSGDRDPEVREKALKLGANKYIPKPFSIKELMKVVEELLN
1949	MKSILLVDDSETLSKIISFALEKKGYSVTLAPNGVAALEKLKEFLPDLIIVDLSMPPMNGYELLKILKEDPELKKIPVVVLSLDRDPEVEKRALELGADAYIPKPFSIEELMKVVEKLLN
1950	MKSVLLVDDSETMRKIISFALKKEGLTVTYAKNGKEALEKLEEFLPDLIIVDLRMPPMNGFELLERLKNDPKLRKIPVVVLSADRDPEVEKRALEAGADAYIPKPFSIEELMKVVKKLLE
1951	MKTILLVDDSETLSKIISFALEKEGYKVIKAKNGIEALKKLEEFLPDLIIVDLSMPPMDGFELLKILKNNEKLKKIPVIVLSLDSDPEVEKKCLEAGANKYVPKPFSIKELIKIVKELLN
1952	MKSVLLVDDSETLRKVISFGLKKEGYTVKYAPDGIEALEKLKEFLPDLIICDLRMPKMNGYEFLKILKNDEELKKIPVIVLSGDRDPEVEKRCLELGANYYVPKPFSISELMEIAKKLLE
1953	MKKILLVDDSETLRKIISFALESEGYEVIFAKNGKEALEKLKEFLPDLIIVDLRMPPMNGFELLKILKNDPKLKKIPVIVLSKDRTPEVKEKALKAGANAYVPKPFSISELISIVKKLLE
1954	MKKVLLVDDSETLAKIIKFALEKEGLEVVLAPNGIAALEKLKEFLPDLIIVDLRMRPMNGLELLRILKEDEKLKEIPVVVLSADRDPEVEEEALKAGADAYIPKPFSIKELMEVVKKLLE
1955	MKSVLLVDDSETLAKIIKFALESEGYKVILAPNGIEALKKLEEQLPDLIICDLSMPPMNGYELLKILKEDEKLKNIPVVVLSGNRDPEVEEECLKLGANYYIPKPFSIKELIEVIKKLLE
1956	MKKVLLVDDSEVMQKVISFALEKEGYEVVRAPDGKEALEKLKKFLPDLIIVDLNMPIMNGFELLKILKNDEKLKKIPVIVLSADRDPEVEEKALELGADKYIPKPFSIQELMEVVKKLLE
1957	MKSVLLVDDSETLRKIISFALKSKGYSVVFAKNGIEALEKLKEFLPDLIIVDLNMPPMNGYELLKILKEDEKLKNIPVIVLSANRDPEVEKKALELGANKYIPKPFSIQELMEVAEKLLN
1958	MKKVLLVDDSETLRKVISFALESRGYSVVFAPDGKAALEKLKKFLPDLIIVDLDMPKMNGLELLKILKEDPELRKIPVIVISKDRSPEVEKKCLEAGANAYVPKPFSIKELMEVAEKLLN
1959	MKSILLVDDSETLRKIISFALEKEGYTVTLAKNGIEALKKLEEFLPDLIILDLSMPPMNGFEILKILKENEKLKKIPVIVLSADRDPEVEQRALELGADKYVPKPFSIEELMKIVKELLE
1960	MKSILLVDDSETMSKIISFALESKGYSVVRAPNGLAALEALEKQRPDLIILDLRMRPMNGLEVLRRLAEDPELRGIPVVVLSGDRSPEVEEEALAAGADAYVPKPFSIKELIEIVEKLLN
1961	MKSILVVDDSETLNKIITFALEKEGYTVTLAKNGIEALEKLKEFLPDLIICDLNMPPMDGLTLLKILKNDEKLKKIPVIVLSLDSSPEVKKKALEAGADKYIDKPFSIKELMEEVKKLLN
1962	MKRVLLVDDSETLRKIISFALEKRGYSVVLAPNGREALEKLEEFLPDLIIVDLSMPPMNGYELLRRLREDPELREVPVVVLSGNRDPEVEKRALELGADAYVPKPFSIEELMEVVDRLLE
1963	MKSVLVVDDSKTLQKVITFALESEGYKVTLAPNGKEALEKLEKQLPDLIILDLRMRPMNGLEVLKILKNNEELKKIPVIVLSADRSPEVKEECLKAGANAYIPKPFSISELMEVAKKMLE
1964	MKSVLLVDDSKTLQKIISFALESKGYKVILAPNGIEALKKLEEFTPDLIIVDLSMPPMNGFELLKILKNNEKLKNIPVVVLSKDRDPEVKEECLKLGANKYIPKPFSIEELIEVVEELLN
1965	MKSVLVVDDSETLRKIITFALEKEGYTVTWAPNGKEALKKLEKELPDLIIVDLRMRPMNGLELLKILKNDEKLKKIPVIVLSKDRTPEVKEKCLEAGANKYIPKPFSIEELMKVAKKLLN
1966	MKKILVVDDSETLRKVITFALESKGYSVVLAPNGKEALEKLKEFLPDLIICDLRMPPMNGLELLKILKNNPELKKIPVIVLSLDRDPEVEQKCLEAGANAYVPKPFSIEELMKIVEELLN
1967	MKTVLLVDDSEVLRKIISFALESEGLKVIYAKNGIEALEKLKKELPDLIIVDLSMPKMNGFELLKILKEDEKLKNIPVVVLSKDRSPEVEKKCLELGANAYIPKPFSISELMEVVKKLLN
1968	MKTVLLVDDSETLRKIIKFGLEKEGYKVIEAKNGKEALEKLKKFLPDLIILDLRMPIMNGLEVLKILKENEELKKIPVVVLSGDRTPEVEKEALEAGANAYIPKPFSIKELLETIKKLLN
1969	MKKILLVDDSETLSKIISFALKSRGYEVIFAPNGIEALEKLKEFLPDLIIVDLRMPLMNGYELLKILKEDEKLKNIPVVVLSANRDPEVEEKALKLGANAYVPKPFSIRELMEIVEKLLN
1970	MKSVLLVDDSETLSKIISFALESEGYSVIFAPNGVEALEKLKEFLPDLIIVDLRMPPMNGFELLKILKENEELKKIPVIVLSADRDPEVKEECLKLGANKYVPKPFSIKELIEIVKELLN
1971	MKSVLLVDDSETLRKIISFVLKSKGLKVVYAPDGIEALKKLEEFLPDLIIVDLNMPKMNGFELLKKLKEDEKLKKIPVIVLSRNRDPEVEKEALELGANKYIPKPFSLKELMEVVEELLN
1972	MKSVLLVDDSEVLRKVISFAIEKEGYKVVYAPNGIEALEKLKEFLPDLIILDLSMPPMNGYEVLKILKEDEKLKNIPVIVVSGDSSPEVEEKALELGANAYVPKPFSIEELMKIIKELLN
1973	MKKVLLVDDSETLAKVIKFALEKEGYEVVLAPDGVEALKKLEKFLPDLIIVDLRMPKMNGLELLKILKEDEERKNIPVIVISRDRSPEVEEEALKAGADKYIPKPFSIEELMEVAKELLN
1974	MKSVLLVDDSETLRKIISFALEKEGYSVIFAKDGIEALKKLEEFLPDLIIVDLSMPKMNGLELLKRLKNDPKLKKIPVVVLSKNRDPEVEKKALELGADKYVPKPFSIKELMEIIKELLN
1975	MKSVLLVDDSETLRKIISFALEKEGYKVVLAKDGKEALEKLKKFLPDLIIVDLDMPKMNGYELLEILKNDEKLKKIPVIVLSGDSDPEVEEKALKLGADKYVPKPFSIKELMKIAKELLN
1976	MKSVLLVDDSKTLRKVIKFALESEGYTVIEAPNGKEALEKLKKFKPDLIIVDLRMPPMDGFTLLEILKNDEELKNIPVIVLSGDRDPEVEKRALELGADKYIPKPFSISELMEVAKKLLN
1977	MKSILLVDDSETMRKIIKFALESEGYTVVEAPDGRAALEKLKKFLPDLIILDLNMPPMNGLEVLRILAEDEELREIPVLVLSADRSPEVKERALEAGADAYVPKPFSISELMKIVKELLN
1978	MKKILLVDDSETLNKIISFALEKEGYSVIRAKNGIEALEKLKEFLPDLIICDLSMPKMNGYEFLKILKEDEKLKNIPVIVLSKDRDPEVEKKCLELGADAYVPKPFSIKELMEIVKELLE
1979	MKTVLLVDDSETLSKIISFAIESRGYKVILAPNGKEALEKLEKFLPDLIILDLRMPPMDGFELLKILKEDEKLKNIPVVVLSRDRSPEVEKKALEAGADAYVPKPFSIKELMEIIEKLLN
1980	MKKVLLVDDSETLSKIISFALEKRGYSVVLAPDGVAALEKLKKFRPDLIIVDLRMPKMDGLELLRILKSDPELRNIPVLVLSGNRDPEVEKECLEAGANAYIPKPFSIEELMEVVEKLLN
1981	MKSILLVDDSETMRKIIKFGLEKEGYKVIEAKNGKEALKKLEKFKPDLIILDLRMPIMNGYELLKILKENEELKNIPVIVLSGDRDPEVKEKALKLGANYYIPKPFSIKELLEVVKKLLN
1982	MKSVLVVDDSETMNKIITFALEKEGYKVTLAPNGKEALEKLKEFLPDLIIVDLSMRPMNGLELLKILKNDEKLKNIPVIVLSANRDPEVKKEALEAGANKYIPKPFSIKELMEVAKELLN
1983	MKSVLLVDDSETLRKVISFALEKRGYKVVFAPDGKTALEKLKEFLPDLIIVDLSMPPMNGFELLRILKNDEKLKKIPVIVLSANRDPEVEERCLELGADAYVPKPFSIKELMEIAEKLLN
1984	MKSVLLVDDSETLSKVISFALESEGLSVVFAPNGKAALEKLKEFLPDLIIVDLDMPPMNGLELLRELAEDEERRKIPVVVLSKDRSPEVEQRCLEAGANAYIPKPFSIKELMEVVKKLLN
1985	MKSILLVDDSETLSKIISFALESKGYKVTFAKNGKEALEKLKKFLPDLIIVDLSMPIMNGYELLKILKEDEKLKKIPVIVLSANTDEEVKEKALKLGANKYIPKPFSIKELIEVIEKLLN
1986	KKKILLVDDSKTLRKIISFALEKEGYEVVFAEDGIEALEKLKEFTPDLIIVDLRMPKMNGFELLKILKNDEKLKEIPVVVLSADRDPEVEKRCLELGANAYIPKPFSIKELMEVVKKLLE
1987	MKSILLVDDSETMSKIISFAIEKRGYSVIRAKDGKEALEKLKKFLPDLIILDLRMPKMNGFEVLKILKNNEELKNIPVVVLSADRSPEVEKKCLELGANKYIPKPFSIKELMKVIDELLN
1988	MKSVLLVDDSEVLRKIISFALEKRGYKVVLAPNGKEALEKLKKFTPDLIIVDLNMPPMNGFELLKILKNDEKLKKIPVVVLSADRDPEVEKEALELGADKYVPKPFSIEELMKVVEKLLN
1989	MKSILLVDDSETLRKIISFALKSRGYTVIEAKDGIEALKKLEKFTPDLIILDLNMPKMNGFELLKILRNNEELKNIPVVVLSRDRDPEVEQRALELGANAYIPKPFSIQELMKVVDKLLN
1990	MKKVLLVDDSETLRKIISFALEKEGYEVIFAPNGKEALEKLKEFLPDLIILDLNMPPMNGFELLKILKENEELKKIPVVVLSGDRSEEVKKEALEAGANAYIPKPFSIKELMEVVKKLLN
1991	MKSILLVDDSETLRKIISFGLESEGYSVTLAKNGKEALEKLKEFLPDLIILDLRMPPMNGYELLKILKNDEKLKKIPVVVISKDRDPEVEKRALELGANAYVPKPFSISELLKIIKKLLE
1992	MKSILLVDDSETLRKIISFALESKGYTVIFAPDGVAALKELEKQLPDLIIVDLRMPKMDGFELLRRLKEDEKLREIPVIVLSGDRDPEVEERCLELGANKYIPKPFSIQELMEEVEKLLN
1993	MKSVLLVDDSETLRKIISFALESRGYSVVRARNGKEALEKLKEQLPDLIIVDLRMPPMNGFELLKILKNDEKLKDIPVIVLSGDRDPEVEKKALEAGANAYIPKPFSIQELMEVVEKLLN
1994	MKKVLLVDDSETLRKIISFALKKEGLEVIYAPDGIEALEKLEKELPDLIILDLSMPKMNGFEVLKILKNNEKLKKIPVIVLSADRSPEVEEKALELGANKYIPKPFSIEELMKVVKEMLN
1995	MKSVLLVDDSETLRKIISFILESEGYSVVLARNGKEALRKLEEFRPDLIILDLRMPIMNGEEVLRRLAEDPELREVPVVVLSLDRSPEVEERALALGADAYVPKPFSPKELLEIVKKLLN
1996	MKSVLLVDDSETLRKIISFALEKEGYTVIFAPDGIEALEKLKEFLPDLIIVDLSMPKMNGLEFLKILKNDPKLKNIPVIVLSGNRDPEVEKRCLEAGANAYVPKPFSIKELMEIAKKLLN
1997	MKTVLVVDDSETLNKIITFGIEKEGYKVIRARNGIEALEKLKKFRPDLIIVDLRMRPMNGLELLRILAEDEELKGIPVVVLSRDRSPEVEQEALEAGADAYVPKPFSISELMEVIKKLLE
1998	MKSILLVDDSETLRKIISFALESRGYTVTFAPNGIEALKKLKEFLPDLIIVDLRMPPMNGYELLKILKNDEKLKKIPVLVLSGNRDPEEEERALKLGANAYVPKPFSIEELMEIVDKLLN
1999	MKTVLLVDDSEVLSKVISFALEKEGLKVIRAKDGIEALEKLKEFLPDLIIVDLNMPKMNGFELLKILKNDEKLKNIPVVVLSLDRDPEVEKRCLELGANKYVPKPFSIEELMKVVKELLN
[truncated: 3,001 more rows]

## Sheet: FS
ID	Sequence
1	MKSILLVDDSEELRKKIAEALKSKGYTVTFARDGVEALKKLEEFLPDLIIVDLRMPPMDGFTLLKRLKEDEELKKIPVIVISRDESPEVKEKALKAGANAYIPKPFDLEELMEVVDKLLN
2	KKKILLVDDSEELRKKISEALKSEGYEVIWARDGVEALKKLEEELPDLIIVDLDMPPMNGYELLKKLKENEKLKKIPVIVLSADTSPEVKERALKLGADAYIPKPFDLEELMKVVKKLLN
3	MKKVLLVDDSEELREEISKALKSRGYSVIYAPNGIEALEKLKEFTPDLIIVDLKMPPMNGFELLKILKNDEKLKNIPVIVLSRDTSPEVEKEALEAGANAYVPKPFDLDELMEIVEKLLN
4	MKSVLLVDDSEELRKKITEALESRGYSVVLARDGIEALKKLEKFLPDLIIVDLRMPPMNGLELLKKLKNDEKLKKIPVIVLSSDTSPEVKEECLKAGANAYIPKPFDLDELIEVAEELLN
5	MKSVLVVDDSEELRAEITAALEARGYTVVLAPDGVAALEKLKEFLPDLIIVDLRMPPMDGWELLEILRNDEELREVPVIVLSADTDPEVRRRALEAGADAYIPKPFDLDELMAVAEELLN
6	MKSVLVVDDSEELREKITKALESRGYTVTWAPNGEEALRKLEKQLPDLIIVDLRMPPMDGLELLRRLAEDEKLRKVPVVVLSRDTDPAVRERCLAAGADAYVPKPFDLEELMEIVDKLLN
7	MKSVLVVDDSEELREKITAALESEGLTTILAPNGIEALEKLEKELPDLIIVDLRMPPMDGLELLKILKENEKLKKIPVVVLSADTDPEVEEKCLKAGADKYVPKPFDLEELMAVVRELLN
8	MKSVLLVDDSEELQERIAAALEAEGLSVIRARNGEEALEKLKEFLPDLIIVDLRMPKMNGLELLKKLKEDPELKKVPVVVLSADTDPEVEKKCLEAGADAYVPKPFDLEELMAIVRELLE
9	MKSVLLVDDSEELRKEIKAALESEGYTVVEAPDGIEALKKLEEFLPDLIIVDLRMPPMDGFELLKILKNNPELRKIPVVVLSADTSPEVRERALKAGANKYVPKPFDLEELMKVVKELLE
10	MKTILLVDDSEELRELISKALESEGYSVIFAPDGIAALKKLEEFLPDLIIVDLRMPPMNGLELLKILKNNEKLKNIPVIVLSADTDPEVEKKCLEAGANAYIPKPFDLEELMEVVKKLLN
11	MKKVLVVDDSEELRKKITEALESEGLEVIWAPNGIEALKELEKFLPDLIIVDLDMPPMNGFELLKILKENEKLKEIPVVVLSSDTSPEVEKRCLEAGANAYVPKPFDLDELMEIVKKLLN
12	MKSVLLVDDSEELRARIAAALEARGYTVVLAPDGVEALRKLEEFRPDLIIVDLRMPPMDGFTLLRRLKEDPELREIPVVVLSADTSPEVRERALEAGADAYVPKPFDLDELMAVVEELLN
13	MKSVLLVDDSEELRKKIAEALESEGYSVVFAPNGIEALKKLEEFKPDLIIVDLDMPPMNGFELLKKLKEDEELKNIPVIVLSADTDPEVKERALKLGADKYVPKPFDLEELMEVAKKLLN
14	MKTVLLVDDSEELREKISKALESEGLKVIFARDGIEALEKLEKFKPDLIIVDLDMPPMDGFTLLEKLKNDEELKEIPVVVLSSDTSPEVRERALEAGADAYIPKPFDLEELMKVVKELLN
15	MKKVLVVDDSEELRKKISEALKKEGLEVIWARDGEEALEKLKEFLPDLIIVDLRMPKMNGFELLKKLKEDEKLKKIPVIVLSGDTSPEVEKKALEAGADAYIPKPFDLEELMEVVKKMLE
16	MKSVLLVDDSEELREEISAALRSRGYTVVWAPDGRAALEKLEEFRPDLIILDLEMPEMDGLEVLRRLREDPELREIPVIVLSADTDPEVERRCLEAGADAYIPKPFDLEELIAVAEKLLN
17	MKKVLLVDDSEELQEIISKALESRGYSVVRARNGVEALEKLKEFTPDLIIVDLEMPPMDGFTLLKILAEDEERRKIPVVVLSRDTSPEVKERCLKAGANAYIPKPFDLDELMEVVEKLLN
18	MKTVLVVDDSEELRKEITKALESEGYKVVLAPDGVAALEKLKEFRPDLIIVDLDMPPMDGLTLLRILAEDPELREIPVVVLSRNTDPEVRRECLEAGANAYVPKPFDLEELMKVVKELLN
19	MKSVLLVDDSEELRERIAAALRAEGWTVVFAPNGKEALEKLKKFLPDLIIIDLRMPDMNGFELLKILKENEELKKIPVIVLSGDTDPEVKEKCLKLGANAYIPKPFDLDELIAVARELLS
20	MKSILVVDDSEELREKITAALESRGYTVVLARDGKEALEKLKKFLPDLIIVDLEMPEMDGLTLLKVLKEDEKLKEIPVVVLSRDTSPEVERRCLELGANAYVPKPFDLDELMEIVEKLLN
21	MKSVLVVDDSEELREKITEALESEGLTVVLAPDGEEALEKLKEFLPDLIIVDLEMPKMDGLEFLKRLKEDEELKKIPVVVLSADTSPEVEEECLKAGADAYVPKPFDLDELMAIVRKLLE
22	MKKVLLVDDSEELREKIKKALESEGYEVVLAPDGIAALEKLKEFLPDLIIVDLRMPPMDGFTLLKILKNDEELKKIPVIVLSRDTSPEVEKKCLEAGADAYIPKPFDLEELMEVAKKLLN
23	MKSVLLVDDSEELRERIAAALRAEGLTVVFAPDGVAALEKLKEFLPDLIIVDLDMPPMDGFELLEKLKNNEELRKIPVVVLSSDTSPEVEKRALEAGADKYVPKPFDLEELMAIVRELLE
24	MKSVLVVDDSEELRKLITEALESRGYTVVLARDGVEALEKLKKFLPDLIIVDLRMPPMDGFELLRILKNDEKLKKIPVLVLSADKDPEVEKRALELGASAYVPKPFDLDELMEIVEKLLN
25	MKKILLVDDSEELRKRIAAALEAEGYSVVYAPNGIAALEKLKEFTPDLIIVDLDMPPMNGLELLKKLKNDEKLKKIPVIVLSRNTDPEVEEKCLKAGANAYVPKPFDLEELMEIVRKLLE
26	MKSVLLVDDSEELREEISKALKSEGYSVVYAPDGIAALEKLKEFLPDLIILDLDMPPMNGLEVLKILKNDEELKKIPVVVLSADTSPEVREKALEAGANAYVPKPFDLEELMEVVKKLLE
27	MKSVLLVDDSEELRERIAAALESRGLTVRFAPDGVAALEELEKWLPDLIIVDLDMPPMDGFELLRRLAADPELRGVPVLVLSADTSPEVRRRALEAGADAYVPKPFDLEELMAVVEELLS
28	MKSVLLVDDSEELREKIAAALESEGLTVVWAKDGIEALKKLEKFLPDLIIVDLRMPPMDGFTLLEILKNDEKLKNIPVVVISADTDPEVEKRCLEAGADAYIPKPFDLEELMAVVRELLN
29	MKKVLLVDDSEELREKIKKALESEGFSVVLARDGKEALEKLEKFLPDLIIVDLEMPEMNGFELLKILKENEKLKKIPVIVLSKNTDPEVEKKCLEAGADAYVPKPFDLEELLKIAKKLLN
30	MKSILVVDDSEELRKKITEALESEGYTVIWARDGIEALEKLKEFLPDLIIIDLRMPPMDGFELLKILKNDPELKKIPVVVLSADTDPEVKEEALKLGADAYIPKPFDLEELMEVIKKLLN
31	MKSVLLVDDSEELRERIEAALRAEGWTVRRAPDGVAALEKLKEFTPDLIIVDLRMPPMDGLELLRTLAEDEELRKVPVIVLSADASPEVRREALEAGADAYVPKPFDLDELVAVARALLE
32	MKSILLVDDSEELRKEIKAALEAEGYTVIEAPDGIEALKKLEEFLPDLIIVDLEMPPMNGLELLKILKENEELKKIPVVVLSARTDPEVEEEALEAGADAYVPKPFDLDELMAIVKKLLE
33	MKSVLVVDDSEEERERITAALEAEGLTVILARDGVEALEKLKEFTPDLIILDLRMPPMDGFTLLKELKEDEKLKKIPVVVLSRDTDPEVEKRALEAGANAYIPKPYDLEELMAVVKKLLE
34	MKSVLLVDDSEEERERIKKALESRGYTVTLAKNGKEALEKLKEFLPDLIIVDLRMPPMNGLELLKILKNDEKLKNIPVIVLSGDTSPEIKKKCLEAGANAYIPKPFDLEELMKVVEKLLN
35	MKSVLLVDDSEELRERIAAALEAEGYTVTFAPDGKAALEKLKESLPDLIIVDLRMPPMDGFTLLKILKEDPKLKEIPVIVLSGDTSPEVKKRALEAGANAYIPKPFDLDELMAVARELLE
36	MKKVLLVDDSEELREKIEKALRSRGYEVIRAPDGVEALEKLEKELPDLIIVDLRMPKMDGFELLRRLANDPKLREVPVIVLSADTDPEVRQRALEAGADAYVPKPFDLEELMKIVEELLN
37	MKSVLVVDDSEELREEITAALESEGLSVTLAPDGVAALEKLKKFLPDLIIVDLEMPPMDGFTLLEVLKNNEELKKIPVVVLSADTSPEVEERCLKAGANAYVPKPFDLDELMAIVKKLLN
38	MKKILVVDDSEELREKITKALESRGYETVWAPDGIAALEKLKKFLPDLIICDLRMPKMDGYTLLEILKNDEKLKNIPVVVLSRNTDPEVEKRCLELGANKYVPKPFDLEELMEIVEELLN
39	MKSILLVDDSEELQEKISKALESRGYTVIRAPDGIEALEKLKKELPDLIIVDLRMPPMNGFELLKTLKEDEKLKNIPVVVLSGDESEEVKEECLKLGANAYVPKPFDLEELMEIVEKLLN
40	MKSILLVDDSEELQKEIKEALEKEGYTVVFAPDGVSALEKLKKFTPDLIIVDLDMPPMNGFELLKTLKEDPELRKIPVIVLSRRKDPEVEKRCLELGADKYVPKPFDLEELMKIVKELLE
41	MKTVLLVDDSEELRKKISKALESRGYKVILARDGVEALEKLKKFLPDLIIVDLDMPPMDGFKLLETLKNDEELKKIPVIVLSRNTDEEVKERCLKLGANKYIPKPFDLEELMEVAEKLLN
42	MKSVLVVDDSEELREEIVKALESEGYSVVLAKDGEEALEKLKKFLPDLIIVDLRMPKMDGFELLKILKNDEKLKNIPVVVLSADTTPEVRERALKAGANAYVPKPFDLEELMEIVKKLLE
43	MKSVLLVDDSEELRKKISKALESEGYTVTWASNGVEALKKLKEFLPDLIIVDLRMPPMNGFEFLKILKNDEKLKNIPVIVLSSNSDPEVKEKCLKLGANKYVPKPFDLEELMKIAKELLN
44	MKSVLLVDDSEEERERIAAALESEGYTVTFARDGEEALKKLEEFTPDLIIVDLRMPKMNGFELLKILKENEKLKKIPVIVVSSDTDPEVKEEALKLGADAYVPKPYDLEELMAIARKLLE
45	MKSILLVDDSEELRKKISKALESRGYSVIYAPNGIEALKKLEEFLPDLIIVDLRMPPMDGLEFLKILKNNEELKNIPVIVLSRDTDPEVEKECLEAGANAYIPKPFDLDELMEVVDKLLN
46	MKSILLVDDSEELREKISKAIESEGYTVIYAPDGIEALEKLKEFKPDLIIVDLDMPPMDGFTLLEILKNDPELREIPVVVLSANTDPEVEERCLEAGADKYVPKPFDLEELMKVIKELLN
47	MKTVLVVDDSEELRREITAALESRGYSVIWAPDGIEALEKLKKQLPDLIIVDLEMPKMNGLELLKILKNNPKLKNIPVIVISSDTDPEVEEKCLEAGANAYVPKPFDLEELIAIAEKLLN
48	MKSVLLVDDSEELRERITEALESEGYTVRLAPDGVAALKELEKFLPDLIIVDLRMPPMDGFTLLKILKNNEKLKNIPVIVLSADTDPEVREKCLKLGANKYVPKPFDLDELIKIAKELLN
49	MKSVLLVDDSEELREEIAAALRSRGYTVVFAPDGVAALEKLKEFLPDLIIVDLRMPPMDGFELLKTLRNDEKLKKIPVLVLSADRDPEVRERCLEAGADAYVPKPFDLDELMAIVEELLN
50	MKSVLLVDDSEEERERIARALRSRGYTVVFAPNGVAALEKLKEFLPDLIIVDLRMPPMDGYELLKILKNDPELKKVPVIVLSGDTSPEVRERALKLGADKYVPKPFDLEELMAVAEELLN
51	MKSVLVVDDSEALRAEITAALESRGYTVTLAPDGKAALEALKKSLPDLIIVDLEMPEMDGLELLKVLKNDEKLKKIPVIVLSRNTDPEVEEECLKAGANAYVPKPFDLDELMAIAEKLLN
52	MKSVLLVDDSEELQELITKALESRGYTVIRAPDGIAALEKLKKTLPDLIIVDLKMPPMDGLTLLKILKEDEKLKNIPVIVLSSDSSPEVKEECLKAGADAYIPKPFDLEELMEVAEKLLN
53	MKKILLVDDSEELRKEITAALESRGYSVVTAPNGIEALKKLEKFTPDLIIVDLEMPPMDGFTLLEILKNNEKLKKIPVIVLSADTDPEVKERCLELGANAYVPKPFDLEELMAIVEKMLN
54	MKSVLVVDDSEELREEITRALESEGYTVVWAPDGVEALRKLEEFLPDLIIVDLDMPPMDGFELLRRLREDEELRKVPVIVLSADTDPEVEERALEAGADAYVPKPFDLDELMRIARELLE
55	MKTVLLVDDSEELRERISKALESRGYKVIFARNGIEALEKLKEFLPDLIILDLNMPPMDGFELLKKLKNDEKLKNIPVIVLSADTSPEVKKKCLELGANAYVPKPFDLDELMAIADKLLN
56	MKTVLLVDDSEELRKEISKALESRGYKVIFARNGIEALEKLKKFLPDLIILDLDMPEMNGLELLKILKEDEELKKIPVIVLSSNTSEEVKKECLEAGANAYVPKPFDLEELMKIAEKMLN
57	MKSILVVDDSEELREEITAALKAEGYTVTWAPDGKEALEKLKKFKPDLIIVDLRMPEMDGLELLKILKEDEELKNIPVIVLSGDTSPEVREKCLKAGADKYIPKPFDLEELMAVVKEMLE
58	MKSVLLVDDSEELRKEIAEALESRGYSVVFAPDGLEALEKLEEFLPDLIILDLRMPKMDGFELLRILKNDPELRKIPVIVLSGDTSPEVKERALEAGADAYIPKPFDLEELIEVAEKLLN
59	MKTILLVDDSEELREEISKALESEGYKVIFAKDGIEALKKLEKFLPDLIIVDLDMPKMNGFELLKILKNDEKLKNIPVVVLSRNTDPEVKKRALEAGADAYIPKPYDLEELMAVVKKLLE
60	MKKILLVDDSEEERKKIAEALKSKGYEVVFAPDGIAALEKLKEFLPDLIIVDLDMPPMNGYELLKILKNDEKLKEIPVVVLSRDTSEEVKKRALELGANAYVPKPYDLEELMEVVEKLLN
61	MKSILLVDDSEELRKEISAALESRGYSVVWAPDGVAALEKLEKFTPDLIIVDLEMPPMDGLELLRRLKEDPVLRKVPVVVLSADTDPEVERRCLEAGADAYVPKPFDLEELMAVVEKLLN
62	MKKILVVDDSEALRERITAALEAKGYTVIWAPDGKEALEKLKKELPDLIIVDLRMPEMDGFELLKILKNDEKLKKIPVVVLSADTSPEVEKRCLEAGADAYVPKPFDLEELMAIVEKLLN
63	MKSILVVDDSEELREKISKALESRGYTVIWAPDGKAALEKLKESLPDLIIVDLRMPPMDGYTLLKILKNDEKLKKIPVVVISSDTDPEVKEKCLKLGANAYVPKPFDLEELMEIVEKLLN
64	MKSVLLVDDSEELREEITAALRARGYTVTLARNGIEALEKLKEFRPDLIILDLRMPPMDGFTLLEILKNDEELKEIPVIVLSGNTDPEVEKRALEAGADAYIPKPFDLDELMAVAERLLN
65	MKSVLVVDDSEELRKRISEALESKGYTVVWAPNGIEALKKLEEFLPDLIIVDLEMPPMNGFELLKKLKNDEKLKNIPVVVLSKRKDPEVEKECLELGANKYVPKPFDLEELMKVCEELLN
66	MKSVLLVDDSEAEQEEIEAALRARGYTVVRAPDGVAALEKLEAFTPDLIIVDLDMPPMDGLALLERLAADPELRGVPVIVLSADTSPEVERRCLEAGADAYVPKPYDLDELMAIAERLLT
67	MKKVLLVDDSEELRKKISEALESEGYKVIWAENGIEALEKLKEFLPDLIIVDLEMPPMNGFELLKILKEDEKLKNIPVIVLSKNKDPEVKEKCLKAGANAYVPKPFDLEELIKIAKKMLN
68	MKTVLLVDDSEELRKEIAKALESEGYSVIFAPDGKEALEKLKEFKPDLIIVDLRMPEMNGLELLKILKNDEELKNIPVVVISADTSPEVEKKCLEAGANAYIPKPFDLEELMEVVKKLLN
69	MKSVLVVDDSEELQKEITKALESEGYSVVLAPDGKSALEKLKKFLPDLIILDLEMPPMNGYEVLKILKNDEKLKKIPVVVLSSNTDPEVEEKCLKLGANKYVPKPFSLEELMEIVKELLN
70	MKKVLLVDDSEELRERIAAALEAEGYEVVLAPDGVAALEKLKEFRPDLIIVDLEMPPMNGFELLRILKEDEELREIPVVVLSRDTSPEVRERCLEAGADRYVPKPFDLEELMAVVRELLE
71	MKSILLVDDSEELRKKIKEALESRGYTVILAPNGKAALEKLEKFLPDLIILDLRMPDMNGFEVLKILKNNPELKKIPVVVLSGNTDPEVKEKALKLGANKYIPKPFDLEELMKVVEELLN
72	MKSVLVVDDSEELREKITKALESEGYKVIWAPDGKAALEKLKKFKPDLIIVDLDMPPMDGFTLLKELKNDEELRNIPVIVVSADTSPEVRKRALEAGANAYVPKPFDLEELMKIVKELLN
73	MKSVLLVDDSEELQEEITAALEARGYTVVRAPDGVAALEKLKEFLPDLIIVDLRMPPMDGFTLLEILKNDPELRKIPVIVLSADTSPEVKERALEAGADAYVPKPFDLEELMAIAEKLLN
74	MKSVLLVDDSEELRKKIAEALESRGYTVVFAPDGIEALEKLKEFLPDLIICDLEMPKMNGFELLKILKNDEKLKKIPVIVLSGDSSEEVKERCLEAGANYYVPKPFDLEELMEIAEKMLN
75	MKSVLLVDDSEELRKRITAALEAEGYTVVEAPDGVEALKKLEESLPDLIIVDLDMPEMDGFELLERLKNDEKLRKIPVIVLSADTDPEVEKRALELGADKYVPKPFDLEELMAIARELLE
76	MKSVLLVDDSEELRERIAKALESRGYTVIFARNGIEALEKLKEFLPDLIILDLRMPPMNGFEVLKILKENEELKKIPVVVISARTDPEVEKECLELGANAYVPKPFDLEELMAVVEKLLN
77	MKTVLLVDDSEEEREEISEALEKEGYKVIRARDGEEALKKLEEFLPDLIIVDLDMPKMNGFELLKRLKNDEKLKKIPVIVLSSDTSPEVEKKCLEAGADKYIPKPYDLEELMKEVKKLLE
78	MKSVLLVDDSAALAEEISAALRSRGYTVTLAPDGVAALEALEKQLPDLIIVDLRMPPMDGLTLLERLRNDPRLREVPVVVLSADTSPEVRERCLEAGADAYVPKPFDLEELMAVVERLLE
79	MKSVLLVDDSEELREEITAALESRGYTVVTARNGKEALEKLKKFLPDLIIVDLEMPPMNGFELLKILKNDEELKNIPVIVLSADTSPEVKKKALEAGADKYVPKPFDLDELMAVAEELLS
80	MKSVLLVDDSEELQKEISAALESEGLTVVLAPDGVAALEKLEEFLPDLIILDLRMPPMDGLELLRRLAEDPELRKVPVVVLSRDTSPEVRQRCLEAGADAYVPKPFDLEELIEIVKKLLE
81	MKSVLLVDDSEALAERIEAALRARGYTVRRAPNGIAALEELKKFLPDLIIVDLRMPPMDGFELLKILKNDEKLKEIPVVVLSADTDPEVEEEALELGADAYVPKPFDLEELMAVVEELLN
82	MKSILLVDDSEELRKKIKEALESKGYTVTLARDGIEALEKLKKELPDLIIVDLRMPKMDGLELLKILKEDEKLKKIPVVVISRDTSPEVRERALEAGANAYVPKPFDLEELIKIIEKLLN
83	MKKVLLVDDSEELRRRIAEALRSEGLEVVEAPDGVAALEKLEKFRPDLIIVDLRMPPMDGLELLRRLREDPELREIPVVVLSADTSPEVERRALEAGADAYVPKPFDLEELMAIVRELLE
84	MKTVLLVDDSEELQDEITAALEKEGLKVVRAPNGIEALEKLKKFLPDLIIVDLRMPPMNGFELLKILKNDEKLKEIPVIVLSRNTDPEIEKKCLELGANKYVPKPFDLEELMKEVKKLLN
85	MKSILVVDDSKELREKITKALESRGYTVTLAEDGKEALEKLKKELPDLIIVDLRMPEMNGFELLKILKEDEKLKKIPVIVLSGDTSPEVEKRALEAGANAYIPKPFDLEELMEVVEKLLN
86	MKSILLVDDSEELREKISKALKSEGYSVTWAPDGIEALKKLEEFLPDLIILDLKMPKMNGLEILKKLKEDEELKKIPVIVLSRDKSPEVKEECLKLGANKYIPKPFDLEELMKVVKKMLE
87	MKSILLVDDSEELQERISKALESRGYTVVRAPDGVEALEKLKEFLPDLIIVDLRMPKMNGFELLKILKNDEELKNIPVIVLSGDSDPEVEKKALELGANKYVPKPFDLEELMKVAEELLN
88	MKSILLVDDSEELREKISKALESEGYTVVFARDGVEALEKLEKFLPDLIILDLDMPKMNGLEVLRRLKEDEELRKIPVVVLSARTDPEVRKEALEAGADAYVPKPFDLEELMEIVKKLLN
89	MKSVLLVDDSEELQEKITKALKSRGYTVIRAPDGIEALRKLEKFRPDLIIVDLRMPPMDGLELLRKLREDEELREIPVVVLSRDTSPEVREEALEAGADAYIPKPFDLDELMEVVDKLLN
90	MKSVLVVDDSEELRKEIAEALESRGYTVVWAPDGVEALRKLEEFLPDLIIVDLEMPPMDGLELLRRLAEDEELREVPVVVLSRDTSPEVRERCLELGADAYVPKPFDLEELMAIVDELLN
91	MKKVLVVDDSEELRERITAALKSEGLEVVLAPDGVAALEKLEEFLPDLIIVDLRMPPMDGLELLRTLAEDEKLREIPVVVLSADTSPEVERECLEAGADAYVPKPFDLDELMEIVKELLE
92	MKKILLVDDSEELRERIKKALESEGYSVVLARDGKEALEKLKEFKPDLIIVDLRMPEMDGFELLEILKNDEELKNIPVLVLSRDEDPEVRERCLEAGADAYVPKPFDLNELIEIVKKLLN
93	MKSVLLVDDSEELRKLIKEALESEGYTVVLARDGVEALEKLKEFLPDLIILDLRMPPMDGFTLLEELKNDEERRKIPVVVISSDTSPEVRERCLKAGADKYVPKPFDLEELMEIVKELLN
94	MKSILLVDDSEALRREIAAALEAEGYTVVFARNGIEALEKLEEFRPDLIILDLRMPPMNGFEVLKILKNDEELREIPVIVLSADTDPEVEKRCLELGADAYVPKPFDLDELMAIVREKLN
95	MKSVLLVDDSEELREEIAAALRSRGYTVVFAPNGIEALKKLEEFLPDLIIVDLRMPPMDGLELLKILKNDEKLKNIPVIVLSADTSPEVEKKALEAGANAYVPKPFDLEELMAVVERLLN
96	MKSVLVVDDSEELRERITAALESEGYTVTWAPDGIAALEELKKKLPDLIILDLRMPKMDGFTLLKILKNDPKLKKIPVIVISGDTSPEVKEKCLEAGADAYVPKPFDLEELMAIARKLLN
97	MKSVLLVDDSEELRKEISKALESRGYKVIWAPDGVAALEKLKEFLPDLIIVDLRMPKMDGFTLLEILKNDEKLKNIPVIVLSRDTTPEVREKALKAGANAYIPKPFDLEELMKVAEELLN
98	MKSILLVDDSEELRKEISAALEAEGYTVTWAPNGIEALKKLEKFTPDLIIVDLRMPPMDGLELLKILKNDEKLKNIPVVVLSGDKDPEVEKECLEAGANAYVPKPFDLEELMAVVKRLLE
99	MKTVLLVDDSEELRKEISAALESRGYTVVWAEDGVAALEKLKEFTPDLIICDLRMPKMNGFELLKILKNNEELKKIPVIVLSGDTSPEVRKECLELGANKYVPKPFDLDELMAVADELLN
100	MKSVLLVDDSEELQEEITAALESEGYTVVRARDGIEALEKLKEFTPDLIIVDLRMPPMDGFTLLKILKNDEKLKEIPVIVLSADSSPEVRKKALELGADKYVVKPFDLEELIAVAKELLE
101	MKKVLLVDDSEELREKISAALKAEGYEVIWARNGVEALEKLKKELPDLIIVDLRMPPMDGFELLKILKNDEKLKKIPVVVLSGDKSPEVKKKALEAGANAYVPKPFDLEELMEIVRKLLN
102	MKSILVVDDSEELREKITKALESRGYTVIWAPDGIEALEKLKKSLPDLIIVDLEMPPMDGFELLKTLKNDEKLKNIPVLVLSRDTSPEVEKRALEAGADAYVPKPFDLEELMEVVEKLLN
103	MKKVLVVDDSEELRERITAALKSRGYEVVWAPDGVEALEKLKKFLPDLIILDLRMPPMNGYEVLKILKEDEKLKKIPVIVLSADRSEEVKEKCLKLGANKYVPKPFDLEELMAVVEELLN
104	MKSVLLVDDSEELREKISKALESRGYSVVWAKDGIEALEKLKEFLPDLIILDLRMPPMDGFEVLKILKENPKLKEIPVIVLSRDTSPEVKEECLKAGANAYVPKPFDLEELMKIAEKLLN
105	MKSVLLVDDSEELRERIKKALESRGYSVVLAPDGVEALEKLKKFLPDLIILDLRMPKMDGFELLKILKNNEELKKIPVVVLSANTDPEVRKKCLELGADKYVPKPFDLEELMEVVEELLN
106	MKSILLVDDSEEERKKIAEALESKGYKVIFAKNGKEALEKLEKFLPDLIIVDLRMPEMDGFELLKKLKEDEKLKNIPVIVISGDSDPEVKEECLKLGADKYIEKPYDLEELIEVVEELLN
107	MKTVLVVDDSEEERERITAALEARGLKTIWAPDGVAALEKLKEFLPDLIIVDLRMPPMDGLELLRILAEDPELRKVPVVVLSADADPEVRERCLAAGASAYIPKPYDLDELMAVVEKLLT
108	MKSILLVDDSEELQKKISEALESRGYTVVRAPNGIEALEKLEKFLPDLIIVDLRMPPMDGFELLKKLKEDPELKKIPVIVLSGNTDPEVEKECLELGADKYIPKPFDLEELMKVVEELLN
109	MKSVLLVDDSEELREEISKALESEGYTVVYARNGIEALKKLEKFLPDLIILDLRMPPMDGFTLLEILKNNEKLKKIPVIVISSDTSPEVEKRCLELGANAYIPKPFDLEELIEVAKKLLE
110	MKSILLVDDSEELRKKISKALESKGYTVIYARNGIEALEKLKEFLPDLIICDLRMPPMDGFTLLKILKNDEKLKNIPVVVISRDTSPEVREEALKLGANYYVPKPFDLEELIKIIEKLLN
111	MKSVLLVDDSEELRKKITEALESEGYTVIKAKDGIEALEKLKEFLPDLIILDLDMPPMNGLEVLKILKNDEKLKNIPVIVLSGDTDPEVEKKCLEAGANAYVPKPFDLEELMAIVKKLLE
112	MKSILLVDDSRELREEISRALRARGYTVVWAPDGVAALEKLREFLPDLIIVDLDMPPMDGFALLRALREDPELREVPVVVLSADTSPEVRERALAAGADRYVPKPFDLEELMEIVEELLE
113	MKTVLLVDDSEELQKKIKKALEAEGYKVILAPNGIEALEKLKEFLPDLIIVDLRMPPMNGFELLKILKEDPELKNIPVVVISKDTDPEVKKKCLEAGADAYIPKPFDLEELMKVVKKLLN
114	MKKVLLVDDSEELQEEITKALESEGLTVIRAPNGEEALEKLKEFTPDLIIVDLDMPPMNGFELLKKLKEDEKLKNIPVIVLSSNTDPEVEEKCLELGANAYIPKPFDLEELMEVAKKLLE
115	MKSVLLVDDSEEERREISEALRSRGYSVVLARDGIEALEKLKEFLPDLIIVDLRMPKMDGFTLLKILKNDPELKKIPVLVLSADTDPEVKEEALKAGADAYIPKPYDLDELMAVVEELLN
116	MKTVLLVDDSEELRERITAALESRGYKVVWAPNGIEALEKLKEFLPDLIIVDLDMPPMNGLELLKILKNDEKLRKIPVVVLSRDTSPEVRKKALEAGADAYVPKPFDLDELMEIVDELLE
117	MKKVLVVDDSEEERERITKALESEGYSVVLAPDGIAALEKLKEFLPDLIIVDLEMPPMDGYEFLEILRNDPKLRKIPVVVLSRDTSPEVRERALELGADAYVPKPYDLEELMEIVKKLLE
118	MKSVLLVDDSKELREKISEALKSEGYTVVWAPDGIEALKKLEKFLPDLIILDLRMPKMDGFELLKILKNNEELKKIPVIVISSDTSPEVKEKALKLGANAYVPKPFDLDELIEIAKKLLN
119	MKSVLLVDDSEALREEITAALEAEGLTVVTARDGKEALEKLKEFLPDLIIVDLRMPEMDGLELLKILKEDEKLKNIPVVVLSRDTSPEVKEKCLKAGANAYIPKPFDLDELMAVVRKLLN
120	MKSVLLVDDSEELQEEITRALESEGWTVTRAPDGVAALEKLKEFLPDLIIVDLDMPKMNGFELLKKLKEDEELKKIPVIVLSRDKSPEVEEKCLKAGANKYVPKPFDLEELMAVARELLN
121	MKSILLVDDSEELQEKISAALKSRGYTVVRAPDGIEALEKLKEFLPDLIIVDLRMPPMDGFTLLKELKNDPKLKKIPVVVLSARTDPEVEKEALEAGADAYVPKPFDLDELMAIVEELLN
122	MKSVLLVDDSEELRERITAALESEGWTVVRARDGVEALKKLEEFLPDLIIVDLRMPKMDGFELLKKLKEDEKLKEIPVIVLSRDTSPEVKEKCLEAGADKYIPKPFDLEELLAVAKELLE
123	MKKVLLVDDSERERERISKALKSEGYEVVYAPDGIAALEKLKKFTPDLIIVDLRMPPMDGFELLKILKEDEKLKNIPVIVLSADTTPEVKERALKAGANAYIPKPYDLEELMEVAKKLLN
124	MKSVLLVDDSEELRERIAAALEAEGLTVVRARNGIEALEKLKEFLPDLIIVDLRMPPMNGLELLEKLKNDEKLKKIPVLVLSADADPEVERRCLEAGADAYVPKPFDLEELMAIVRELLN
125	MKSVLLVDDSEELRERISAALKSRGYTVVPARNGVEALEKLKEFLPDLIILDLDMPPMNGLEVLRILKNDPELKKIPVVVLSRRSDPEVEKEALEAGADKYVPKPFDLEELMAIVEELLN
126	MKSVLLVDDSEELRKKISEALKSRGYSVVFARDGIEALKKLEEFLPDLIIVDLEMPKMDGLELLKVLKNDEKLKKIPVIVISRDTDPEVEEEALKAGADAYVPKPFDLDELMEIVEKLLN
127	MKKVLVVDDSEELRERITAALESRGYEVIWAPNGKEALEKLKEFLPDLIIVDLRMPPMDGLELLKILKEDEELKKIPVIVISRDTSPEVEEECLKAGADAYVPKPFDLEELMAIVEELLN
128	MKSVLLVDDSEEERKEIAEALEKEGYTVTFARDGIEALEKLKEFTPDLIIVDLRMPKMDGLTLLEILANDEKLRKVPVVVLSADRDPEVEKRCLEAGANAYVPKPYDLEELMEIVKKLLE
129	MKSILLVDDSEELRERISKALESEGYTVVWAPNGIEALEKLKEFLPDLIIVDLRMPPMDGLEFLKILKNDEKLKKIPVVVLSGNTDPEVRQRCLEAGADAYVPKPFDLEELMKIVKELLE
130	MKSVLLVDDSEEERERISKALESRGYKVVFAKNGKEALEKLKKFLPDLIIVDLEMPEMNGFELLKILKNDEKLKKIPVIVISKNTDPEVEKECLEAGADKYVPKPFDLEELIAIAEELLN
131	MKSILVVDDSEELRERITKALESKGYTVVWARNGIEALKKLEKFLPDLIICDLRMPEMDGLELLKILKNNPELKKIPVIVISSDTSEEIKKKCLEAGADKYIPKPFDLEELMKEIEKLLN
132	MKSVLVVDDSEELREEITAALRSRGLTVTLAPNGIEALKKLEEFLPDLIILDLRMPPMDGFEVLKILKNNPKLREIPVIVLSRDTDPEVEKEALEAGADAYIPKPFDLDELMEVVEELLN
133	MKSVLLVDDSEELRKEIAEALESRGYSVIFAPDGIEALKKLEEFLPDLIILDLRMPPMDGFEVLRILKEDEKLKEIPVVVLSGDKSPEVREKALELGADAYIPKPFDLEELMAVVEELLN
134	MKSILLVDDSEELRERIAAALEARGYTVTFAPDGVAALEKLKEFTPDLIIVDLRMPPMDGFEFLEILKNDPELRKVPVVVLSADTSPEVEQRALEAGADAYVPKPFDLDELMAIVEELLN
135	MKSVLLVDDSEELQEKITAALEAEGYTVVRARDGIEALEKLKKFLPDLIIVDLRMPKMDGFELLRILKNDEELKEVPVIVLSADTSPEVRKKALEAGADAYVPKPFDLDELMAIAKELLN
136	MKSILLVDDSEEERRKIKEALESRGYTVVFAPDGIEALKKLEKFLPDLIIVDLRMPEMDGFTLLKKLKEDEKLKNIPVIVVSRDTSPEVKKEALEAGANAYVPKPYDLEELMKIVEKLLN
137	MKTVLLVDDSEELREKISAALEAEGLKVVWARDGVEALEKLKKFLPDLIILDLDMPPMDGFEVLKILKEDEKLRKIPVVVLSADTSPEVEKRCLELGANAYIPKPFDLEELMAVVKELLE
138	MKSVLLVDDSEELRREIAEALEAEGYTVVFARDGVEALEKLKEFLPDLIIVDLEMPPMDGLELLRILKNDEKLREIPVIVLSADTDPEVERLCLEAGADAYIPKPFDLAELMAVARELLE
139	MKTVLLVDDSEELREKISKALESEGYKVIFAPDGKKALEELKKFLPDLIIVDLRMPEMNGFELLKILKNDEKLKKIPVIVLSGDTDPEVREKCLELGANAYIPKPFDLEELMKVCKELLE
140	MKTVLVVDDSEELLERITAALRARGYTVIRAPDGIAALEKLEEFLPDLIILDLRMPPMDGFEVLEVLKNDPELREIPVVVLSADTSPEVKERALEAGADRYVPKPFDLDELLAVVEELLS
141	MKSVLLVDDSEEERERITAALRSRGLTVTLARNGKEALEKLKKFLPDLIIVDLRMPPMDGFELLRELKNDEKLKEIPVIVLSGDTSPEVEKEALELGADAYVPKPFDLEELMAVVERLLN
142	MKSVLLVDDSAELREKIRAALEAEGYTVVEAPDGVAALEKLKEFTPDLIIVDLRMPPMDGWELLRVLANDPELRDVPVVVLSADRSPEVRERALAAGASRYVPKPFDLDELMAVVRELLN
143	MKSVLLVDDSEELREKITKALESEGYTVTWAPDGIAALEKLKKFKPDLIIVDLRMPPMDGFELLKILKNDEELKNIPVIVISRDTDPEVEKKALEAGADYYVPKPFDLDELIEVVKKLLN
144	MKSILLVDDSEELRKKISKALESEGYTVVFARNGIEALEKLKKFLPDLIILDLKMPEMDGFTLLKILKNDEKLKNIPVIVLSANTDPEIKKKCLELGANKYVPKPFDLEELIKIIKELLN
145	MKKVLLVDDSEELQKLISEALKSKGYSVVLARDGIEALEKLKKFLPDLIILDLRMPPMNGFELLEILKNDEKLKKIPVIVISGDKDPEVKERALKLGANAYIPKPFDLEELMAVAEKLLN
146	MKSVLLVDDSEELRERISAALRAEGLTVTFAPNGIEALEKLKKFLPDLIILDLDMPPMNGFEVLKILKENEELKKIPVIVLSRDSSPEVKEEALELGANKYVVKPFDLDELMAVAREMLE
147	MKSVLLVDDSEELRKKISEALESEGFTVTWAKDGKEALEKLKKFLPDLIICDLRMPEMNGLELLKILKEDEKLKEIPVVVISADKSPEVEKKCLEAGANAYVPKPFDLEELMAIVRKLLN
148	MKSVLVVDDSEELRKRITAALESRGYTVVWARNGIEALEKLKEFLPDLIIVDLDMPPMDGFTLLKILKEDEKLKKIPVIVLSADTSPEVEKRALEAGANAYVPKPFDLDELMAVVEKLLN
149	MKSVLLVDDSEEERKKISEALESEGYKVIFAPDGVAALEKLKEFKPDLIIVDLDMPKMNGFEFLRELANDEELKNIPVIVLSRDKSPEVEEKCLKLGANAYIPKPYNLEELIEVAKKLLN
150	MKSVLLVDDSEELRERISAALRAEGLTVTWAPSGEEALAKLEEQLPDLIIVDLRMPPMDGLELLRRLAADPELRGVPVVVLSADTSPEVEEEALAAGADRYVPKPFDLEELMAVVRELLE
151	MKSVLLVDDSEELRTRIAAALEARGYTVTFAPNGVEALKKLEEFLPDLIISDLRMPPMNGLELLKILKENEKLKKVPVVVLSSDTSPEVEKEALEAGADKYVPKPFDLDELMAVVDELLE
152	MKKILLVDDSEELREKISKALESRGYEVIYAKNGIEALEKLKEFTPDLIICDLRMPPMDGFELLKILKNDEKLKNIPVIVLSADTSPEVRKKCLELGANYYVPKPFDLEELMKVVEKLLN
153	MKKILLVDDSEELRKKIKEALESRGYSVVFAPDGIEALEKLKEFLPDLIIVDLDMPKMNGFELLKILKNDEKLKNIPVIVLSRDTSPEVKEKCLEGGADAYIPKPFDLEELMEVVEKLLN
154	MKSVLLVDDSEELQERISRALRSRGYTVVRAPDGVAALEKLKEFLPDLIIVDLRMPKMDGLELLRILKNDPELKKVPVVVLSRDTDPEVEKEALEAGANAYVPKPFDLEELLAIVEELLN
155	MKSILVVDDSEELRKRITAALESRGYTVTLAPDGVSALEKLKEFLPDLIIVDLEMPPMDGLELLKILKNDEKLKNIPVVVLSADTSPEVKERCLEAGANAYIPKPFDLEELMAVVEKLLN
156	MKTVLVVDDSEELRRKITEALESRGYKVVLAPDGIEALRKLEEFTPDLIIVDLRMPPMDGFELLETLKNDEKLREIPVIVLSRDTDPEVRKRCLEAGADAYVPKPFDLDELMEIAEKLLN
157	MKSILLVDDSEELRKKITKALESEGYTVILAKNGIEALKKLEKSLPDLIILDLRMPPMNGLELLKILKEDEKLKKIPVVVLSADTSEEVKEECLKLGANKYVPKPFDLDELMEIVKELLN
158	MKKVLLVDDSEELRERIAAALEAEGYEVVFARDGKEALEKLKKFLPDLIILDLRMPEMDGFELLKTLKNDPKLKNIPVIVLSADTSPEVEEKALKLGADAYIPKPFDLEELMAVARKMLN
159	MKSILLVDDSEELREKISKALESKGYSVIWAPDGKAALEKLKEFLPDLIILDLEMPEMNGFELLKILKNDEKLKKIPVVVLSKNTDPEVEEEALKLGADKYIPKPFDLEELIKVIEELLN
160	MKSILLVDDSEELREIIEKALKSEGYTVVRARDGIEALEKLKEFLPDLIIVDLRMPKMDGFTLLKILKEDEKLKKIPVIVLSANTDPEVEKEALEAGADAYVPKPFDLDELMRIVKEKLE
161	MKKVLLVDDSEELRREISEALESEGYEVVFARDGIEALRKLEEFLPDLIIVDLDMPPMNGFELLKILKNDPELRKIPVIVLSSDTSPEVRKRALEAGADKYVPKPFDLEELMRVARELLN
162	MKSVLLVDDSEELRKEISEALKSEGLTVTWARDGVEALKKLEEFLPDLIIVDLEMPEMNGLELLKKLKENEELKNVPVIVLSARTDPEVEKECLEAGANAYIPKPFDLDELMEVALKLLN
163	MKSVLLVDDSEEERREIAEALESRGYTVVFAPDGVAALEKLEEFLPDLIIVDLRMPPMDGFELLKKLKEDEKLKNIPVIVLSSDTDPEVEKECLELGADYYVPKPYDLEELMEVAEKLLN
164	MKKVLLVDDSEELRKKISAALEAKGYEVVWAPDGIEALEKLKEFLPDLIIVDLRMPPMDGFTLLEILKNDEELKNIPVIVLSANTDPEVKQRCLEAGANYYVPKPFDLEELIAVAEKLLN
165	MKKVLLVDDSEELRKEIAAALEAEGYEVVLARDGIEALEKLKEFLPDLIIVDLEMPPMNGFELLKILKEDPELKKIPVIVLSANTSPEVKKEALELGANKYVPKPFDLEELMKVVREMLE
166	MKSVLLVDDSEELRELIARALESEGLSVKFARNGIEALEKLKEFLPDLIIVDLRMPPMDGFELLKILKNDEELKKIPVVVLSADTSPEVKERCLKAGANAYVPKPFDLEELMKIVKKLLN
167	MKSILLVDDSEELREKISKALEAEGYTVIWARNGIEALEKLKKELPDLIIVDLRMPPMNGFELLKILKNNEELKKIPVIVLSGDTSPEVEEKCLKAGANAYVPKPFDLEELIKIVKELLN
168	MKSVLLVDDSEEEREKISKALRSEGLTVTWAENGIEALKKLEKFLPDLIIVDLRMPPMDGFTLLEILKNNEKLKEIPVVVLSGNTDPEVEKRALELGADAYVPKPYDLEELIKIVKELLE
169	MKSVLLVDDSEELREKISKALESRGYTVRWAPDGVAALRLLEEFLPDLIIVDLRMPPLDGLELLRRLAADPRLREIPVIVLSADTDPEVRRRALEAGANAYVPKPFDLDELMEIAEKLLS
170	MKSVLLVDDSEEERERISAALRAEGYTVVWAKDGIEALEKLKKFLPDLIICDLRMPPMDGFTLLEILKNDEELKKIPVVVLSADTDPEVEERCLKAGADAYVPKPYDLDELMAIVRKLLN
171	MKSILLVDDSEELREKITAALESEGYTVTLARDGKEALEKLKEFTPDLIILDLRMPEMDGFTVLKILKNDEKLKNIPVVVLSADTDPEVKEKCLEAGADAYVPKPFDLEELMAIVKELLN
172	MKTVLLVDDSEELREKIAAALESEGYKVVLARDGVEALKKLEKFLPDLIIVDLEMPPMDGFELLKILKENEELKNIPVVVLSARTDPEVRERCLELGANAYVPKPFDLEELMAVVKKLLN
173	MKSVLLVDDSEELRAEIAAALEAEGLTVTWAPDGKEALEKLEKSLPDLIIVDLRMPPMNGFELLKILKNNEELKKIPVVVLSGNTDPEVRKKCLEAGANAYIPKPFDLAELMAVVKELLN
174	MKRVLLVDDSEELREEISAALESRGYSVVWAPDGLEALRKLEEFLPDLIIVDLRMPPMDGWELLRRLREDPELRGIPVIVLSADADPEVRRRALEAGADAYVPKPFDLDELMAIADRLLN
175	MKSVLLVDDSEELREEIKKALESEGYTVVFAPDGIEALEKLKEFLPDLIILDLKMPPMDGFTVLEILKNDEKLKEIPVIVLSANTDPEVKEKALKAGANAYVPKPFDLEELMEIAKKLLN
176	MKSVLLVDDSEELRERITKALEKEGLKVVLAPDGKEALKKLEKFLPDLIIVDLDMPEMNGFELLKKLKEDEKWKNIPVIVLSSDTSPEVKKKALEAGANAYIPKPFDLEELMEVVKKLLN
177	MKRVLLVDDSEELREEISKALEAEGYTVVYAPDGVAALEALEAFLPDLIIVDLDMPPMDGWELLRRLAEDPRLREVPVIVLSGDTSPEERERALAAGADAYVPKPFDLEELMAIAKELLE
178	MKSVLLVDDSEELRERIAAALESRGYTVVTAPDGVAALEKLKEFLPDLIILDLDMPPMDGFEVLRTLANDPELREIPVVVLSADTDPEVERRALEAGADAYVPKPFDLEELMAVVERLLS
179	MKSVLVVDDSEALRERITAALRAEGLEVVLAPDGVEALRKLEERLPDLIIVDLRMPPMDGWELLRRLREDERLRKVPVVVLSRDTSPEERERALRLGADRYVPKPFDLEELMAVVRELLE
180	MKSVLLVDDSEEEAKEIKEALESRGYKVVLAPDGVEALKKLEKFLPDLIIVDLKMPPMDGFTLLKILKNNEELKKIPVIVISADTSPEVKEKCLKLGANKYIPKPYDLDELMKVAEELLN
181	MKSVLLVDDSEELREEISAALESRGYTVTWARNGIEALEKLEEFLPDLIILDLRMPPMNGLEVLKILKNDPELKKIPVVVLSGDTSPEVEKEALEAGADAYVPKPFDLEELMAIVEKLLN
182	MKSVLLVDDSEELRERIARALESRGYTVVLAPDGVAALEALEKQLPDLIIVDLRMPPMDGLALLERLAADPELRKVPVLVLSADTTPEVRERALAAGANAYVPKPFDLEELMEIVEKLLN
183	MKTVLLVDDSEELRERIAAALRARGYRVVWAPDGIEALEKLKEFLPDLIIVDLDMPPMNGFELLEILKNDEKLRKIPVVVLSRRTDPEVEERALKAGADAYVPKPFDLDELMAVVERLLN
184	MKSILLVDDSEELQEKIKKALESEGYKVVLAPNGIEALEKLKEFLPDLIILDLRMPPMDGFTLLKILKNDEKLKKIPVVVLSGDTSPEVKKKCLEAGANAYIPKPFDLEELMKVVKELLN
185	MKSVLLVDDSEELQEKITKALESEGYKVIRAPNGEEALKKLEKELPDLIILDLEMPKMNGFELLKKLKNDEKLKNIPVIVLSKDTSEEVKKKCLEAGANKYIPKPFDLEELMKVAKELLN
186	MKSILLVDDSEELQEKITKALEAEGYKVIRAPNGIEALEKLKKELPDLIIVDLRMPPMDGEELLRILKNDEKLKKIPVIVLSSDTSPEVRERALELGADAYVPKPFDLEELMAIVKEKLE
187	MKSVLVVDDSEELRKKITEALESEGLTVILAKDGIEALEKLKEFKPDLIIVDLRMPKMDGFELLKKLKEDEELKKIPVVVLSADTDPEVKKEALELGADAYIPKPFDLDELMEVVKKLLE
188	MKKVLLVDDSEELRKEIKAALEKEGYEVVFAPDGKEALEKLKEFLPDLIILDLRMPEMDGFELLKILKNNEKLKKIPVIVLSGDSSEEVKKKCLELGANKYVVKPFDLEELMKVAKKLLN
189	MKSVLLVDDSEELREIISKALESEGYTVTYARDGKEALEKLKKFKPDLIIVDLEMPEMNGFELLKKLKEDEELKNIPVIVISKRKDPEVEKKALELGADKYVPKPFDLEELIEIAKKLLN
190	MKSVLLVDDSEEEREEISKALKSKGYSVIYAPDGVAALEKLKEFLPDLIIVDLRMPKMDGFTFLKILKEDEKLKNIPVIVISGDSSPEVKKRALELGANAYVPKPYDLEELIEIVEKLLN
191	MKSILLVDDSEELREKIEKALKSRGYKVVRARNGVEALEKLKKFLPDLIIVDLKMPPMNGFELLKILKNDEKLKKIPVVVLSADSSPEVKEKALKAGANKYVEKPFDLDELMEIVEELLN
192	MKTVLVVDDSEELQKEITKALESEGYKVILAPDGIAALEKLKKQLPDLIIVDLDMPKMNGFELLKILKNNEKLKNIPVVVLSANTTPEVEKEALELGANKYVPKPFDLKELIEIVKKLLN
193	MKTVLLVDDSEEERKKISEALKSRGYKVVWARNGLEALKKLEEFLPDLIILDLDMPPMNGLELLRKLKEDEKLREIPVIVLSADTSPEVERECLEAGADAYIPKPYDLEELMEVVEELLN
194	MKSVLLVDDSEELRERIAAALEAEGLTVVLAKDGIEALKKLEEFLPDLIIVDLRMPKMDGLTLLKILKNNEKLKNIPVIVLSRNTDPEIKEKCLKAGANAYVPKPFDLDELMAIVRELLE
195	MKKVLLVDDSEELRKKISEALKSRGYEVVFAKDGIEALEKLKKFLPDLIIVDLDMPPMNGYELLKILKNDEKLKNIPVIVLSKNTDPEVKERCLKLGANKYIPKPFDLEELMKVAEELLN
196	MKSVLLVDDSEELRERIAAALEAEGYTVVLAPDGLAALEALRERLPDLIILDLRMPPMDGLTLLRTLAEDPELRKVPVLVLSADTSPEVRERCLAAGADAYVPKPFDLDELMAVVRRLLE
197	MKSILLVDDSKEEREKIKKAIESRGYSVVEAPDGISALEKLKKFLPDLIIVDLEMPPMNGFEFLKILKNNEKLKNIPVIVLSGNKDPKVKEECLKAGANAYIPKPYDLEELMEVIEKLLN
198	MKSVLLVDDSEELQKKIKEALESKGYKVILAPNGIEALEKLKEFLPDLIIVDLNMPPMNGFEFLKILKNDEKLKKIPVIVVSKDTSEEVKKKCLELGANYYVPKPFDLEELMKIVEKLLN
199	MKSVLLVDDSEELAERIKKALESRGYTVTLAPDGVAALKKLEESLPDLIIVDLRMPEMDGFTLLEILKNNEELKKIPVIVISRDTDPEVREKCLKAGANKYVPKPFDLEELIAIAEELLN
200	MKTVLLVDDSEELREKISKALESEGYKVIFARDGIEALEKLKEFLPDLIIVDLKMPKMDGFTLLKILKEDEKLKNIPVIVLSRNKDPEVEKEALELGADYYVPKPFDLEELMEIAKKLLE
201	MKSVLVVDDSEELREEITAALEARGYTVVWAPDGVAALEKLKEFTPDLIILDLRMPPMDGFTVLETLKNDPVLRKVPVVVLSRDTDPEVEERALKAGADAYVPKPFDLEELMAVVEKLLN
202	MKSILLVDDSEELRERIRAALEAEGYTVVEAPDGVEALEKLKEFRPDLIIVDLRMPKMNGLELLKILKEDEELREIPVVVLSADTSPEVEEKALEAGADAYIPKPFDLAELMAVVRELLN
203	MKSVLVVDDSEELRKKITAALESEGYKVVWAPNGKEALEKLEKFLPDLIILDLRMPPMDGFEVLKILKENEKLKKIPVIVLSRDTDPEIKKRALEAGANAYIPKPFDLKELMEVVKKLLE
204	MKSILLVDDSEELRKKISEALKSKGYTVIYAPNGIEALEKLKEFLPDLIIVDLRMPPMNGFELLKILKNNEKLKKIPVVVISSDSSEEVKKKALELGADKYVEKPFDLEELMKIVEELLN
205	MKSILLVDDSEELRKKIAEALESEGYTVVYAKDGIEALKKLEEFLPDLIICDLNMPKMDGFTLLKILKNDPKLKNIPVIVISSDTDPEVKKKCLELGANAYIPKPFDLDELMEVVKKLLE
206	MKSVLLVDDSEELQERISKALESEGWTVVRAKDGVEALEKLKKFLPDLIIVDLRMPKMDGYELLKILKEDEKLKKIPVIVISRDKSEEVKEKALELGANKYVPKPFDLEELIKIAKELLE
207	MKSVLLVDDSEELREKISRALKSRGYTVVYAPNGIEALEKLKKFLPDLIIVDLDMPPMNGFELLKILKNDEKLKNIPVIVLSGDKDPEVKEKCLKLGANKYVPKPFDLEELMEEVEKLLN
208	MKSVLLVDDSEELRKKIKEALESRGYTVVEAPNGIEALEKLKEFLPDLIIVDLRMPPMDGFELLRVLKNDPKLRKIPVVVVSADEDPEVRERALELGADAYVPKPFDLEELMEIVDKLLN
209	MKTILLVDDSEKEREKIAKALKSEGYKVVFAPNGVEALEKLKKFLPDLIIVDLDMPPMNGYELLKTLKNDEKLKNIPVVVISKNSSEEEKERALKLGANAYVPKPYDLKELMEIVKKLLN
210	MKSILLVDDSEELRAEIAAALESRGYTVTYAPDGIEALEKLKKSLPDLIIVDLDMPPMDGFTLLEILKNDEKLKNIPVIVLSRDTSPEVEERCLKAGANAYIPKPFDLDELMAVVEKLLN
211	MKSILVVDDSEEERERITKALESRGYTVVWAPNGVEALKKLEEFLPDLIILDLRMPPMDGFELLKKLAENPELKKVPVVVLSADTSPEVEERALKAGANAYVPKPYDLEELMKIVEKLLN
212	MKRVLLVDDSEELRERIAAALRSEGYSVVWAPDGVAALEVLERFLPDLIILDLRMPPMDGFALLRRLAEDPELRGVPVVVLSADTDPAVEERALAAGADAYVPKPFDLEELMAVVRELLE
213	MKSVLVVDDSEELQERITRALESEGLTVVRARDGEEALKKLEKFLPDLIICDLRMPKMNGLELLKKLKEDEKLKEIPVVVLSADTSPEVKKKCLEAGANAYIPKPFDLEELMRVVRELLE
214	MKSILLVDDSEELRKRISEALESEGYTVVWARDGVEALKKLEKFTPDLIILDLDMPEMDGFEVLRILKNDPKLKKVPVIVLSADRSPEVEKRCLEAGADAYIPKPFDLDELMAVVRKLLN
215	MKSILLVDDSEELRKEISAALESRGYTVTWAPNGIEALKKLEEFLPDLIILDLRMPPMNGFEVLEKLKNDEELKKIPVIVLSADTDPEVRERALKAGADAYVPKPFDLEELMAIVDEKLN
216	MKTVLLVDDSEEERKLISKALESRGYKVIFAPDGVEALEKLKEFLPDLIICDLRMPPMNGFELLKILKEDEELKNIPVIVLSANKDPEVEKECLEAGADAYIPKPFDLEELMEVVEKMLN
217	MKTILLVDDSEEERERIKKALEKEGYKVIFARDGIEALKKLEKFLPDLIILDLDMPKMNGFELLKILKNNEKLKNIPVVVLSKDTSPEVKKKCLEGGANYYVPKPFDLEELIKIIKELLN
218	MKSILLVDDSEELRERISAALRSRGYTVTFARDGEEALKKLEKFLPDLIIVDLRMPPMDGLTLLKKLKEDEKLKKIPVVVVSRNTDPEIEKECLEAGANKYVPKPFDLEELMAVVEELLE
219	MKSILLVDDSEELRKKISEALESKGYKVVFARNGVEALKKLEEFLPDLIIVDLRMPEMNGLELLEILKNNEKLKNIPVIVISRDTSPEIRKRCLEAGADAYVPKPFDLEELMEIVEKLLN
220	MKSILLVDDSEEEREEITKALESRGYTVVRAPDGVEALKKLEEFLPDLIICDLKMPPMDGFTLLKKLKNDEKLKKIPVIVLSGDTSPEVEKECLELGANKYIPKPYDLEELMKVAEELLN
221	MKSVLLVDDSEELRKRISEALEAEGYSVVWAPDGVEALRKLEEFLPDLIIVDLRMPPMDGFELLRVLREDPELREVPVVVLSADTSPEVRRRCLEAGADAYVPKPFDLEELMAVVRELLE
222	MKTILLVDDSKELQEEISKALKSEGYKVIWAPDGIEALEKLKKFLPDLIICDLRMPPMNGFEFLEILKNNEELKKIPVVVLSSNTDPEVKEKALKAGANYYVPKPFDLEELMEIIKKLLN
223	MKSILLVDDSEELRERITAALEAEGYTVITAPNGIEALEKLKEFLPDLIILDLDMPPMNGFELLKILKENEELRKIPVVVLSGDTSPEVEEECLKLGADVYVPKPFDLEELMAVVKKLLN
224	MKSVLLVDDSEELRRRIAAALEAEGYTVHFAPNGVEALRKLEEFLPDLIIVDLRMPPMDGLELLKILKNDEKLKNIPVIVLSGNTDPEIEKKALELGANKYVPKPFDLDELMAVARELLN
225	MKSVLLVDDSKELREKITKALESRGYKVVEARNGIEALEKLKKFLPDLIILDLEMPPMNGFEVLKILKNNEELKKIPVIVLSRNKDPEVEKKCLELGADKYVPKPFDLEELMEIAEKLLN
226	MKKVLVVDDSEELREKITEALEKEGYEVVWAPDGVAALEKLKEFKPDLIIVDLRMPKMNGLELLKILKNDPELKNIPVIVLSGDTSPETRKRCLEAGADAYVPKPFDLEELMAVAKKLLE
227	MKSVLLVDDSEELRREIAAALEARGYTVVLARDGVEALRKLEEQLPDLIILDLEMPPMDGFEVLRRLAEDPELRGVPVVVLSRDTTPEVRERALAAGADAYVPKPFDLDELLAVVERLLS
228	MKKVLVVDDSEELREKITKALESKGYKVIWAKDGIEALEKLKEFLPDLIIVDLDMPPMDGLELLRILKEDEKLKNIPVIVLSRNTDPEVEKRCLEAGANAYVPKPFDLEELMKIAEKLLN
229	MKSVLLVDDSAELAAEITAALEAEGLTVTLAPDGVAALEKLKESLPDLIIVDLRMPPMDGFTLLRILKNDEKLKNIPVIVLSADTSPEVEKEALELGANAYIPKPFDLDELMAVARELLN
230	MKTVLLVDDSEELRERIAAALEAEGLTVIFAPDGVAALEELKKRLPDLIIVDLRMPPMDGFELLRILKEDEELRKIPVVVLSADTDPEVRKRALEAGADAYVPKPFDLEELMAVVRKLLN
231	MKSILLVDDSEEERKKIKAALEAEGYTVTEAPDGVAALEKLKEFTPDLIIVDLRMPPMDGFTLLRILKNNPELRKVPVVVVSGDTDPEVKERCLEAGADAYIPKPFDLEELMEVVKKLLN
232	MKSVLVVDDSEELRERITAALEARGYSVTWARDGVEALRKLEEFLPDLIIVDLRMPEMDGFALLRRLAADPRLREIPVIVLSADTSPEVRERALAAGANAYVPKPFDLEELMAIAEKLLN
233	MKSVLVVDDSEELRERITAALEAEGYTVVLAPDGVAALEKLKESLPDLIIVDLRMPPMDGLTLLRTLANDPELRKVPVVVLSADTSPEVEEECLRAGADAYIPKPFDLDELMAVVRELLN
234	MKSVLLVDDSEELRKKITKALESEGYKVVYAPNGKEALEKLKEFLPDLIIVDLDMPPMNGFELLKKLKNDPKLKEIPVIVLSGDTNPEVKEKCLKLGANEYIPKPFDLEELIKVAKKLLN
235	MKSVLLVDDSEELRKKISEAIESEGYSVVWAPNGIEALEKLKEFLPDLIIVDLRMPPMDGLELLKILKNDPELKKVPVVVISRDTDPEIRERCLKAGANEYIPKPFDLEELMEVIKKLLN
236	MKRVLLVDDSEELRERIAAALRAEGLEVVFAPDGIAALEKLKEFLPDLIIVDLRMPPMDGLTLLRILANDEELKKIPVVVLSADTDPEVEERCLAAGADAYVPKPFDLDELMAIVRELLE
237	MKSVLLVDDSEELRKLISEALESRGYTVTWAENGIEALEKLKEFLPDLIILDLEMPPMNGFELLKILKEDEKLKNIPVIVLSRRTDPEVKEEALKLGANAYIPKPFDLEELMEVVEELLN
238	MKSVLVVDDSEELRERITAALEAEGLTVIWAPDGVEALEKLKKQLPDLIIVDLRMPPMDGLTLLKILKEDEKLKEIPVIVLSSDTSPEVEEEALEAGADAYVPKPFDLDELMAVVRELLE
239	MKSVLVVDDSEELRERITAALEARGYTVTWAPNGIEALKKLEEFLPDLIIVDLRMPPMDGFELLKILKNNEKLKKIPVIVLSADTSPEVEKRCLEAGADAYVPKPFDLDDLMAVAEKLLN
240	MKSVLLVDDSEELRARIAAALEARGYTVVWAPDGVAALEKLEEFLPDLIIVDLRMPPMNGFELLRILKEDEELRKIPVVVLSGDTDPEVEERCLELGADKYVPKPFDLAELMEVVEELLN
241	MKSVLLVDDSAELRERIAAALEARGYTVTLAPDGVAALEALRKSLPDLIIVDLRMPPMDGLELLRVLREDPALRSVPVVVLSADTSPEVRREALEAGADAYVPKPFDLDELMAVVERLLS
242	MKSVLLVDDSEELRKEISEALESEGYTVTFAPNGIAALEKLKKFLPDLIIVDLDMPPMNGLEFLKILKEDEKLRKIPVIVLSADTDPEVKERCLEAGANKYVPKPFDLEELMKVAKELLN
243	MKKVLLVDDSEELRERIKKALESEGYEVVLAKNGIEALEKLEKFLPDLIIVDLEMPPMDGFELLKKLKEDEKLKKIPVIVLSADTSPEVKEKALKAGANAYVPKPFDLEELIKIAKELLN
244	MKSVLLVDDSEELRRLISEALRSRGYTVRFAPDGVAALEALREFTPDLIIVDLRMPPMDGFELLRRLASDPELRGVPVVVLSRDSSPEVRERALELGADAYVPKPFDLEELMRVVEELLN
245	MKSILLVDDSEEERKLISEALESEGYTVTFAPDGIAALEKLKEFLPDLIIVDLDMPPMNGYELLKILAENEELKKIPVIVLSGDTSPEVRKRCLELGANAYIPKPFDLEELMEVVKKLLE
246	MKSILLVDDSEELREKITKALESRGYTVVYAKNGEEALKKLEKFLPDLIIVDLEMPPMNGFELLKKLKEDPELKKIPVIVLSRNKSEEVKEKALKLGADKYVPKPFDLEELMKIAEELLN
247	MKSILLVDDSEELRKEISKALESEGYSVIFAPDGISALEKLKKFLPDLIILDLDMPPMDGFELLKILKNDEKLKNIPVIVISANKDPEVEKECLELGANKYVPKPFDLEELIEIVKELLE
248	MKSVLLVDDSEALRERIAAALRARGLTVVLAPDGEAALAKLAESLPDLIIVDLRMPPMDGFALLRRLAADPALRGVPVVVLSADTTPEVRERALAAGADAYVPKPFDLDELLAVVEELLA
249	KKSVLVVDDSEELRKKITEALEKEGYTVVEAKNGIEALEKLEKFLPDLIIVDLRMPPMDGFELLKILKNDEKLKNIPVIVISRDKSPEVEKKALEAGADKYIPKPFDLEELIEVAKKLLN
250	MKSVLVVDDSEELRKKITEALESEGLTVTLARDGVEALEKLKEFLPDLIIVDLRMPKMDGFELLKILKNDEELKKIPVIVLSRDTSPEVEEECLKLGADAYIPKPFDLEELMEVVKKLLN
251	MKTVLLVDDSEELREEITAALESRGYKVITAPDGIEALKKLEKFTPDLIIVDLRMPPMNGFELLKILKNNEKLKNIPVIVLSGRTDPEVKEECLKLGANAYIPKPFDLDELMAVVEELLN
252	MKTVLLVDDSEELRERISAALRARGYTVIFAPDGISALEKLKEFLPDLIIVDLRMPPMNGFELLKKLKNDEKLKKIPVVVLSGNTDPEVEKEALEAGADAYVPKPFDLDELMAVVERLLS
253	MKSVLLVDDSEELRRRIAEALEAEGLTVIWAPDGEAALAKLEERLPDLIILDLRMPPMNGLELLARLAADPALREVPVVVLSADTSPEVRERALAAGADAYVPKPFDLEELMEVVRRLLE
254	MKKILLVDDSEEEREEIAKALEKEGYEVILAPDGKAALEKLKEFLPDLIIVDLRMPEMDGFELLKILKEDEKLKNIPVIVLSANTDPEVEKKALEAGADAYVPKPYDLEELIEIVKKLLN
255	MKKVLVVDDSEELREKITKAIKSEGYEVVWAPDGKAALEKLKEFLPDLIIVDLRMPEMDGFELLKILKEDEKLRDIPVIVLSADTSPEVEEKALEAGADKYIPKPFDLDELMEVAKELLN
256	MKTILLVDDSEKERKEISKALESKGYKVIFARDGVEALEKLKKFLPDLIIVDLRMPKMDGFTLLKILKEDEKLKNIPVIVISGDTSPEVEKKALEAGANKYVPKPFDLDELMKIVEELLN
257	MKTVLLVDDSEELRERIKKALESRGYSVILARDGVEALEKLKKQKPDLIIVDLDMPPMNGFELLKILKEDEELKEIPVIVLSRNTDPEVRERALELGANKYVPKPFDLEELMKVAEELLN
258	MKSVLLVDDSEELREKISKALESEGWTVRWAPNGIAALEELEKFKPDLIIVDLRMPPMNGFELLKKLKNNEEWKNIPVIVLSRDTSPEVEKKCLEAGANYYIPKPFDLEELIEVAKKLLE
259	MKSVLVVDDSEELQKKITEALESRGYTVTLAPDGKAALEKLKKFKPDLIIVDLRMPEMDGFELLKVLKEDEELKEIPVVVLSRDTSPEVKERCLKAGANAYVPKPFDLEELMEIVEKLLN
260	MKSVLLVDDSEELRERIAAALRAEGYTVVEAPDGVEALKKLEKFLPDLIIVDLRMPEMDGFELLKKLKEDEKLKKIPVLVLSGDTDPEVEKRCLEAGANAYVPKPFDLDELLAIARELLE
261	MKSVLLVDDSEELAAEITAALESRGLTVTLAPDGVAALEALEKQRPDLIILDLRMPPMDGLELLRRLAEDPELREIPVVVLSADTSPEVERRCLEAGARAYVPKPYDLDELMAVVERLLN
262	MKSVLLVDDSEEERKEISEALEKEGYTVIWAKNGKEALKKLEEFLPDLIIVDLRMPEMNGFELLKKLKNNEKLKNIPVIVLSGDTSEEVKEKCLKLGADKYIPKPYDLEELIEVVKELLE
263	MKSILVVDDSEELREEITKALESRGYTVTLAPDGIAALEKLKEFLPDLIIVDLEMPKMNGFELLKILAENEELKKIPVIVLSRDKSPEVKKKALELGANAYVPKPFDLEELMEIVEKLLN
264	MKKVLVVDDSEEERKEITAALEAEGYSVIWAPDGVEALEKLKEFLPDLIIVDLKMPPMNGFELLKILKEDEELKKIPVIVLSGDKSPEVKKKCLEAGANAYVPKPYDLEELIAIARKLLN
265	MKSVLLVDDSEELRERIAAALESEGLTVVLAPDGVEALRRLEEFLPDLIIVDLRMPPMDGFELLRRLAADPALRGVPVLVLSGDTSPEVRQRALEAGADAYVPKPFDLDELMAVVRELLE
266	MKSVLLVDDSEELRKEISEALESEGLTVIYAKDGIEALEKLKEFLPDLIILDLDMPKMNGFELLKILKNDEKLKKIPVIVLSADTSPEVKKEALEAGADKYIPKPFDLEELMEVVKELLN
267	MKSILLVDDSKELREKIAKALESKGYTVTFAENGKEALEKLKKFLPDLIILDLDMPEMNGFELLKILKNDEKLKKIPVIVLSKDKSEEVKKKCLELGANKYIPKPFDLEELIKVIEELLN
268	MKSVLLVDDSEELRKEIKEALESEGYSVVFAPDGVEALEKLEEFLPDLIIVDLRMPPMNGFELLKILKNDEKLKDIPVIVLSSDTDPEVEKKALEAGADAYVPKPFDLEELIEVAKELLE
269	MKSVLLVDDSEELREKISAALKAEGYTVVFAPDGIEALKKLEKFLPDLIIVDLRMPPMDGFTLLRILKEDPKLRKIPVVVLSRDTSPEVEEECLRAGADKYVPKPFDLEELMAVVKELLE
270	MKSILLVDDSEELRKEISEALESRGYTVTFAPNGIEALEKLKEFLPDLIIVDLEMPPMNGLELLEILKNDPELKKIPVVVLSANTDPEIKERCLKAGANKYVPKPFDLEELIKIIEELLN
271	MKSVLLVDDSEELAERIRAALESEGYSVVLAPDGVAALEKLREFLPDLIILDLRMPPMDGLELLRRLAEDPELRGIPVVVLSADTSPEVERECLEAGADAYVPKPFDLDELMAVVRRLLE
272	MKSVLVVDDSEEERELITKALKSEGYTVTYARNGIEALKKLEEFLPDLIILDLEMEPMNGFEVLKKLKNDEKLKKIPVVVLSSDTSPEVEKECLELGANAYIPKPFDLEELMKVVKKLLN
273	MKSVLLVDDSEELRKEIAAALEAEGLTVVFAPDGIAALKKLEEFTPDLIIVDLNMPEMDGFELLKILKNDEKWKKIPVIVLSRDTSPEVRKKCLELGADEYIPKPFDLDELMAVVRKKLN
274	MKSILVVDDSEELRKKITEALEKEGYKVILAPDGIEALKKLKESLPDLIIVDLRMPPMDGFTLLEILKNDEKLKKIPVIVLSADTSPEVKERALKAGANAYIPKPFDLEELMKVAKKLLN
275	MKSVLLVDDSEELRKKISAALKSRGYTVVFARDGKEALEKLKKFLPDLIILDLRMPEMDGFTLLKILKENEKLKKIPVIVLSADTDPEVKEKCLKAGANAYVPKPFDLDELMEIVEKLLN
276	MKTVLLVDDSEELRERISKALESKGYKVIFAKDGIEALKKLEKELPDLIIIDLEMPPMDGFELLKKLKNDEKLKKIPVIVLSRDSSPEVKKRALELGADKYIVKPFDLEELMKEAEKLLN
277	MKTVLLIDDSEKLREKISKALKSRGYSVIFAKDGKEALEKLEKFLPDLIILDLRMPEMDGFTVLEILKNDEKLKEIPVVVLSRDTSPEVRERALELGADAYIPKPFDLEELMEVVEKLLN
278	MKKVLLVDDSEEERERISEALRSEGYEVIWAPDGIEALKKLEKELPDLIIVDLRMPKMDGLELLKILKNDEKLKNIPVVVLSGDTSPEVKERCLKAGADAYVPKPYDLEELMAIVKKLLE
279	MKTVLLVDDSEEEQEEITAALESRGYKVIRAPNGIAALEKLKEFLPDLIIVDLDMPPMNGFELLKILKNDEKLKKIPVIVLSRDTSPEVEKRALELGANAYVPKPYDLDELMAIVEKLLN
280	MKKVLLVDDSEELRKKIKEALEKEGYSVVEAPDGREALEKLREFLPDLIIVDLRMPEMDGLELLRVLAEDEELRKVPVIVLSRDTSPEVRQRCLEAGANAYIPKPFDLEELIEVAKKLLE
281	MKKILLVDDSERLREEISRALRSEGYEVIWAPNGIEALEKLKEFTPDLIIVDLRMPPMNGFELLEKLKNDEELKKIPVVVLSADKSPEIEKKALEAGANAYVPKPFDLEELMKIVKKLLN
282	MKKVLLVDDSEELREEIEAALRSEGFEVIRARNGKEALEKLKEFLPDLIILDLRMPEMDGLELLKILKEDPELKKIPVIVLSGDTSPEVKKKCLEAGADAYIPKPFDLEELMAVVKKMLE
283	MKTVLVVDDSEELRKKITEALEKEGYKVIWAPNGKEALEKLEKFLPDLIILDLRMPDMDGYEVLKILKEDEKLKNIPVIVLSADTDPEVRKRALELGANAYVPKPFDLDELMKVAKELLN
284	MKSVLVVDDSEELRKKITEALESEGYTVVWARDGVEALEKLKEFLPDLIIVDLDMPKMNGLELLKILKNDEKLKNIPVVVLSRDTSPEVEKKCLEAGADYYVPKPFDLEELIEVVKKLLE
285	MKSVLLVDDSEELREKISEALKKEGLTVVLARDGVEALEKLEEFLPDLIIVDLRMPKMDGFTLLKKLKEDEKLKNIPVVVISRDTSPEVKEKCLKAGANAYIPKPFDLEELMKVVKKLLN
286	MKSVLLVDDSEELRKKIKEALESRGYTVIEARNGVEALEKLKKELPDLIIVDLEMPEMNGLELLKILKNDEKLKKIPVIVLSRNTDPEVKKKCLEAGANKYVPKPFDLEELMKIAEELLN
287	MKSVLLVDDSEEEQKKIAEALESRGYTVVRAPDGEEALEKLKKFLPDLIIVDLRMPKMDGYTLLKILKEDEKLKNIPVVVVSADTSPEVEKRCLELGANAYIPKPYDLDELMEVVEKLLN
288	MKSVLLVDDSEELQARIAAALEARGYTVVRARDGVEALEKLKEFLPDLIIVDLEMPPMDGFELLRILKNDEKLKKVPVVVLSADTDPEVEERCLKAGADAYVPKPFDLDELMAVVDELLN
289	MKSILLVDDSEELREKISKALESEGYSVVWAKNGVEALEKLKKFLPDLIIVDLDMPPMNGLELLKILKNDEELKNIPVIVISGDTTPEVRKKALEAGADAYVPKPFDLEELMEIVKEKLE
290	MKSVLLVDDSKELQEKIKKALESKGYKVVLAENGIEALEKLKEFLPDLIIVDLRMPPMNGFELLKILKEDEKLKKIPVVVISGDTSPEVKERCLKAGANKYVPKPFDLEELMKVVEELLN
291	MKTVLLVDDSEELRERIAKALESRGYKVVFAPDGKEALEKLKEFLPDLIIVDLEMPEMNGFELLKKLKEDEKLKKIPVIVLSRDTSPEVRKKALELGADAYVPKPFDLEELMKIVEKLLN
292	MKSVLVVDDSEELRKEITEALESRGYTVTWAPNGKEALEKLEEFKPDLIIVDLRMPPMDGFELLKILKNDEELKNIPVVVLSRNTDPEVEKECLELGADKYIPKPFDLEELMEVVEELLN
293	MKSVLLVDDSREEREKISRALKSEGYTVIWAEDGIEALKKLKEFLPDLIIVDLDMPPMNGYELLKILKNDEKLKNIPVIVLSKNTDPEVKERALELGANKYVPKPYDLEELMKIAKELLE
294	MKSVLLVDDSEALRAEIAAALEARGYKVVLARDGIEALKKLKEFLPDLIIVDLRMPPMDGLTLLKILKSDEKLKNIPVIVLSADKSPEVEKKCLEAGANAYVPKPFDLDELMAVVEKLLN
295	MKSVLLVDDSEELRERISRALESRGYSVVWARDGVEALEKLREFRPDLIIVDLRMPPMDGWELLRRLAADPELREIPVVVLSADTDPEVERRALEAGADAYVPKPFDLDELMAVVEELLE
296	MKSILLVDDSEKLREEITKALKSEGYTVITAKNGKEALEKLKKQTPDLIIVDLRMPEMNGFELLKILKNDPKLKKIPVVVISRDKSPEVEKKALELGADKYVPKPFDLEELMKIVKELLE
297	MKSVLLVDDSEELAERIRAALEARGYTVTLAPDGIAALEKLEEFLPDLIILDLAMPPMDGLELLRRLAEDEELREVPVVVLSADTSPEVEQRALEAGADAYVPKPFDLDELMAVVERLLN
298	MKSVLLVDDSEELRKEISKALESEGYTVTYAPDGKEALKKLEKFLPDLIIVDLEMPEMNGLELLKILKNDEKLKKIPVIVLSGNTDPEIKKRCLEAGANAYIPKPFDLDELMKVARELLE
299	MKTVLLVDDSEELRKRISEALESEGYKVIYAPDGVEALEKLKEFLPDLIIIDLRMPPMDGFTLLKILKNDPKLKKIPVIVISGDTSPEVEKKALELGANAYIPKPFDLNELIEVAKKLLN
300	MKSVLLVDDSEELREKIAKALESEGYSVVFAPDGIEALEKLKEFLPDLIILDLEMPPMNGFELLKILKENPELKNIPVIVLSRNTDPEVKKRCLEAGANYYVPKPFDLEELMKVAKKLLN
301	MKSVLLVDDSEELRERIARALEARGYTVVWAPDGEAALAALEERLPDLIIVDLDMPPMDGFALLRRLREDPELREVPVVVLSADTSPEVRERALELGADAYVPKPFDLDELMAIVEELLN
302	MKSVLLVDDSEELQERIAAALEARGYTVTRAPDGVAALEKLEEFLPDLIIVDLRMPPMDGFELLKRLKEDEELREIPVIVLSADTSPEVEKRALELGADAYVPKPFDLEELMAIVEELLN
303	MKKVLVVDDSEELRKEISEALESRGLEVVFARDGKEALEKLKEFLPDLILCDLEMPEMDGFTLLKILKEDPELKKIPVVVISRDTSPEVEKECLELGANKYVPKPFDLEELMEVVEELLN
304	MKSVLLVDDSEELRERISAALRAEGYTVVWAPDGVAALRALEERLPDLIIADLRMPPMDGFELLRRLREDPRLREVPVVVLSADTSPEVRRRALEAGADAYVPKPFDLDELMAVVRELLE
305	MKSILLVDDSEELRARIAAALEAEGYTVTLAPDGIAALEKLEKSLPDLIILDLRMPPMNGLEVLKILKENEELKKVPVVVLSADTSPEVEKECLEAGANKYVPKPFDLDELMAVVRELLE
306	MKSILLVDDSEELRERIAAALESRGYTVTYAPDGIEALKKLEKFLPDLIILDLKMPKMDGFELLKILKENEELKKIPVVVLSSDTSPEVKEECLKGGANAYVPKPFDLDELMEVVEKLLN
307	MKSVLLVDDSEELQKEISEALESEGWKVIFAKNGIEALEKLEKEIPDLIIVDLDMPPMNGFELLKKLKNDEKLKKIPVIVLSSDTSPEVKKKCLEAGANAYIPKPFDLEELIEVAKKLLN
308	MKTILLVDDSEELRERITAALESRGYKVIWARDGIEALEKLKEFLPDLIIVDLEMPPMDGFELLKILKENPELKKIPVVVLSSNTDPEVEKKCLELGADKYVPKPFDLEELIAVIEELLN
309	MKSILLVDDSEELRERISEALRAEGYSVVLAPDGVAALEKLKEFLPDLIIVDLRMPPMDGLELLRRLAEDPELREVPVLVLSRDTSPEVRRRCLEAGAHAYVPKPFDLDELMEVIRRLLE
310	MKTVLLVDDSEELREEIERALRSRGYKVIRAKNGIEALKKLEEFLPDLIILDLEMPPMDGFTVLKILKNNPKLKKIPVVVLSRNKDPEVEEKCLKGGANKYVPKPFDLEELMEVVEELLN
311	MKTILLVDDSEELREKIAAALESEGYKVIFAPNGIEALKKLEEFLPDLIICDLRMPPMDGFELLKILKNNEKLKKIPVIVLSRNTDPEVKKKCLELGANKYIPKPFDLEKLMEEVKKLLE
312	MKTVLLVDDSEELREEITKALESEGYKVITAPDGVAALEKLKKQRPDLIIVDLRMPPMDGFTLLEILKNDPELRDIPVVVLSRDTDPEVEERALEAGADAYIPKPFDLEELMKVVKELLE
313	MKSVLLVDDSEELQERISEALESRGYTVVRAPDGVAALEKLREFLPDLIIVDLDMPPMDGLELLRVLAEDPELRKVPVVVLSADTSPEVERRCLEAGADRYVPKPFDLEELMAVVEELLN
314	MKSVLLVDDSEAERAEIAAALEARGYTVTLARDGVEALEKLKEFTPDLIIVDLRMPPMDGLELLRILAEDEELRKVPVVVLSADTSPEVEEEALRAGADAYVPKPYDLEELMAVVDELLN
315	MKTVLLVDDSEALRAQIAAALEARGYSVVLARDGIEALRKLEEFLPDLIIVDLRMPPMDGFTLLETLANDEERREIPVLVLSADTDPEVRERALEAGADAYVPKPFDLDELMAIVEKLLN
316	MKSVLLVDDSEELREKISKALESEGYTVIFAPDGVAALEKLEEFLPDLIILDLRMPPMDGFEVLRILREDPELREIPVIVISRDTSPEVERRCLEAGADAYIPKPFDLEELMKVARRMLN
317	MKRVLLVDDSEEERERITKALESRGYEVVLAPDGIAALEKLEEFLPDLIIVDLRMPKMDGLELLRILKEDPERRKVPVIVLSADTDPEVRERALKAGADKYVPKPYDLEELMAVAEELLN
318	MKSVLLVDDSEELREKIAAALKSRGYTVTFAPNGIEALKKLEKFLPDLIIVDLEMPPMNGFELLKILKNNEELKKIPVVVLSRRTDPEVREECLKAGANAYVPKPFDLEELMAIIDKLLN
319	MKSVLVVDDSEELREKITKALKSEGYTVTWARDGKEALEKLEKSLPDLIIVDLEMPPMNGLELLKILKNNEKLKNIPVIVLSARTDPEVREEALKAGANAYIPKPFDLEELIAVAKKMLE
320	MKSILLVDDSEELQEKITKALESKGYTVVRAKDGIEALKKLEKFKPDLIILDLEMPKMNGFEVLRILKNDEELKNIPVIVLSADKTPEVEEKCLKLGANAYIPKPFDLEELMEVVEKMLN
321	MKTVLLVDDSEELRERIAAALEARGYTVVFAPDGIAALEKLKEFLPDLIIVDLDMPPMDGFELLKRLKNDEELKKVPVVVLSANTDPEVEEKCLELGADAYVPKPFDLEELMAVVERLLN
322	MKRVLVVDDSEELREEITAALEAEGYTVVWARDGVEALEKLKEFRPDLIIVDLRMPEMDGFELLRRLAEDPELRDVPVIVLSRDTDPAVREEALAAGADAYVPKPFDLEELIAVARRLLE
323	MKSILLVDDSEELRERIAAALEAEGYTVTFAPDGIEALEKLKKSLPDLIILDLRMPKMDGLTLLKILKENEELKNIPVVVLSRDTSPEVKEKCLKAGANKYIPKPFDLDELMAVVRELLE
324	MKRVLLVDDSEELQKEISAALESRGYSVVLARDGIEALEKLKEFKPDLIILDLRMPPMNGFEVLKILKEDEELKNIPVIVLSRNKDPEVEKECLELGANKYVPKPFDLDELMAVVDELLN
325	MKKILLVDDSEELQKKISKALESEGYSVIFAPDGISALEKLKEFLPDLIILDLRMPPMNGFELLKILANNEELKKIPVIVLSRDTSPEVKKRCLEAGANAYVPKPFDLEELMEIVKKMLN
326	MKSVLLVDDSEELREKIAAALEARGYTVKFARDGVEALEKLKEFLPDLIIVDLRMPKMNGLELLKILKNDEELKKIPVIVLSADTSPEVKKEALEAGANAYIPKPFDLDELMEVVEKLLN
327	MKSILLIDDSEELRKKISKALKSEGYTVTFARNGIEALEKLKEFLPDLIILDLEMPPMDGFEVLKILKNDEKLKNIPVVVLSANKDPEVEKECLEAGANKYIPKPFDLEELMKVIKELLN
328	MKKVLVVDDSEELRERITEALRSRGYEVVWAPNGVEALKKLEEFLPDLIILDLRMPEMDGFELLKILKNNEKLKKIPVVVISGDTSPEVKEKALKLGADKYVPKPFDLEELMEVVEELLN
329	MKSILLVDDSEELAEKIKKALESEGYTVILAPDGISALEKLKKSLPDLIIVDLDMPPMNGLELLKILKNDEELKNIPVVVLSGDTSPEVKEKCLEAGANAYIPKPFDLEELIEVVKKLLN
330	MKRILVVDDSEELREKITKALESEGYEVVWAPDGKEALEKLKEFLPDLIILDLEMPEMDGFEVLEILKNDEKLRDIPVIVLSRDTDPEVRERALEAGADAYIPKPFDLDELMEVVKELLE
331	MKSVLLVDDSEELREKISKALRSRGYSVVWARDGREALRKLEEFRPDLIIVDLEMPEMDGLELLRRLAEDPELREVPVVVLSRDSSPEVEERCLAAGADRYVPKPFDLEELVEVIEELLN
332	MKTVLLVDDSEELRERIAKALESRGYKVIFAPNGIAALEKLKKFLPDLIIVDLRMPPMNGFELLEILKNDEELKKIPVVVLSADKSPEVEERCLKAGADAYVPKPFDLEELMAIVEKLLN
333	MKTVLLVDDSEELREEISKAIESEGYKVIYARDGIEALKKLEKFLPDLIILDLKMPPMNGLEVLKKLKEDPELKKIPVIVLSSDSDPEVEKECLEAGADAYVPKPFDLEELMKIAKKLLN
334	MKSVLLVDDSEEERERIAAALESEGLTVVFAPDGVEALEKLKEFTPDLIILDLRMPPMDGFEVLKILKNDEKLKNIPVLVLSSDTSPEVKKRALELGADAYIPKPYDLEELMAVVRKLLE
335	MKSVLLVDDSETEREEITRALESEGYTVRYAPDGIAALKELEKFLPDLIIVDLRMPKMNGFELLEILKNNEELKNIPVVVLSADTDPEVKERALKAGANAYVPKPYDLEELMKIVKKLLN
336	MKTILLVDDSEELRKKISKALESEGYKVIFAKDGIEALEKLKKFLPDLIILDLRMPKMDGFELLKILKEDEKLKKIPVIVLSADKDPEVEERALKLGADAYVPKPFDLEELIKIAKKLLE
337	MKSILVVDDSEELREEITRALESEGYTVTWAPNGVEALEKLKKFLPDLIILDLDMPPMNGFEVLEILKNDEKLKKIPVIVLSGDTSPEVKERALKAGADAYIPKPFDLEELMRVVKEKLE
338	MKKILLVDDSEELRKRISEALESEGYEVIYAPDGIAALEKLKKELPDLIIVDLRMPPMDGFTLLKILKEDEKLKKIPVVVLSRDTDPEVEKEALEAGANAYIPKPFDLEELMEVVKKLLN
339	MKSVLLVDDSEELQEKISKALEKEGLTVIRAPNGIEALEKLKKELPDLIIVDLRMPPMDGLEFLKILKNDEKLKNIPVIVLSADTDPKVKEECLKAGANAYIPKPFDLEELMAVVKKLLN
340	MKSVLVVDDSEELRKKITEALKSEGYTVTLARNGVEALEKLKEFLPDLIILDLRMPPMDGLELLKVLKENEELKKIPVVVLSADTDPEVEKRCLEAGANAYVPKPFDLEELIEIVKKLLN
341	MKSVLVVDDSEELRKKITAALEAEGWTTIWAKDGIEALEKLKEFLPDLIICDLRMPKMNGFELLKILKENEELKKIPVIVLSADTDPEVEKKCLEAGADKYIPKPFDLEELIAVAKELLN
342	MKTVLVVDDSEELRREITAALEAEGYTTIWAPDGKAALEKLKEFLPDLIIVDLDMPEMDGFTLLKKLKEDEKLKKIPVIVLSRDTSPEVEKRALELGANAYIPKPFDLEELMAVVRKLLE
343	MKSILLVDDSEKLREIISKAIESEGYSVIFAKDGKEALEKLKKFKPDLIIVDLDMPEMNGFELLKILKEDEELKNIPVIVLSSDTSPEVEKRCLEAGANAYVPKPFDLEELMEIIKKLLN
344	MKSVLLVDDSEELREKISKALESEGWTVIYAPDGIEALKKLEEFLPDLIICDLRMPPMDGFELLRRLKNDPELREIPVIVLSSDTDPEVEERCLEAGADAYVPKPFDLEELIEIAKELLE
345	MKSILLVDDSEELQKLISEALESRGYTVVRAPNGKEALEKLKKFLPDLIILDLEMPPMDGFELLKKLKNDEELKNIPVIVLSKNTDPEVEKKCLEAGADAYIPKPFDLEELMEVVDKLLN
346	MKSVLLVDDSEELRKEISKALESKGYSVVYAPNGIEALEKLKEFLPDLIIVDLDMPPMNGFEFLKILKEDEKLKKIPVIVLSSNTDPEVKEKCLKAGANYYVPKPFNLEELIEIAEKLLN
347	MKSVLLVDDSEELREKIAKALESEGLTVIYAPDGVAALEKLKEFLPDLIIVDLAMPPMDGLTLLKILKEDEKLKKIPVVVLSADTSPEVEEEALEAGADAYIPKPFDLEELMAVVKKLLE
348	MKSILVVDDSEELRKKITEALESEGYTVIWAENGIEALKKLEKFTPDLIIVDLRMPPMNGLELLEILKNNEELKKIPVVVISGNTDPEERERCLKLGANKYVPKPFDLEELMKVVKELLE
349	MKSVLLVDDSEALRERIAAALEAEGLTVVFARDGIEALEKLKEFLPDLIIVDLRMPPMDGLELLKILKEDEKLKKIPVIVVSGDTSPEVKERCLELGADAYVPKPFDLDELMAVVRKMLE
350	MKSILLVDDSEEERRRIAAALESEGYSVVEAPDGIAALEKLKEFLPDLIILDLRMPPMDGFEVLKILKEDEELRKVPVIVLSGDTDPEVEKRCLEGGADAYVPKPYDLEELMAVVRELLE
351	MKSVLLVDDSEELRKKIAEALESEGWTVVFAPNGIEALEKLKEFLPDLIICDLRMPPMNGFEFLKILKNDEELKKIPVIVLSRDTSPEVREKCLKAGANAYVPKPFDLEELIEIAKKLLE
352	MKSVLLVDDSEELRKKISEALESRGYSVVWAPDGVEALEKLKEFLPDLIIVDLRMPPMNGLELLKKLKEDEELKKIPVIVLSADTSPEVEKKCLEAGANAYIPKPFDLEELMEVVEKLLN
353	MKSVLVVDDSEELRKEITKALESEGYSVIWAPDGKAALEKLEEFLPDLIIVDLDMPEMNGLELLKILKNNPKLRKIPVIVLSANSDPEVKEKCLEAGADAYIPKPFDLEELMKVAKKLLN
354	MKKVLLVDDSEELREEISKALESEGYEVIWAPDGVEALEKLEEFLPDLIIVDLRMPPMDGLELLKKLKEDEELKEIPVIVLSRDTSPEVERKALEAGADAYIPKPFDLEELIEVAKKLLE
355	MKSVLLVDDSEELRKLISKALESRGYSVVFAPNGIEALEKLKEFLPDLIIVDLRMPPMNGFELLEILKNDEKLKNIPVIVLSGDTDPEVEKRCLEAGADAYVPKPFDLEELMKIVEKKLN
356	MKTVLLVDDSEELRKKISEAIESEGYKVIFARDGKEALEKLKEFLPDLIILDLNMPEMNGLEVLKILKNDPELKKIPVIVLSRNTDPEVEKEALEAGADKYIPKPFDLEELMKVAKELLN
357	MKSVLLVDDSEELREKISAALESRGYTVIFAPDGIEALKKLEEFLPDLIIVDLEMPPMDGFELLKKLKEDEKLKEIPVVVLSRRKDPEVEEECLELGADKYVPKPFDLEELMAVVEELLN
358	MKSILLVDDSEEEAKEISAALESRGYTVTLAPDGKEALEKLKKFLPDLIILDLRMPPMDGLELLKILKNNEELKKIPVIVLSGNTDPEVEKLCLEAGADAYIPKPYDLDELIAVAEKLLN
359	MKKVLVVDDSEELRERISKALEAEGYSVVWAPNGIEALEKLKKFLPDLIIVDLRMPPMNGFELLKILKNDEKLKNIPVIVLSADTDEEVKEKCLKLGADAYVPKPFDLDELMEIVKKLLE
360	MKTVLVVDDSEELRKKITAALEAEGYKVVWAPNGIEALKKLEEFLPDLIICDLRMPPMDGYTLLKILKENEELKNIPVLVLSADSSPEVKEKCLKLGANAYVPKPFDLEELMAVVRKLLN
361	MKSILLVDDSEKLRKEISAALKSRGYTVVEARDGVEALEKLKKFLPDLIILDLEMPKMNGFELLKKLKEDEELKNIPVIVLSRRSDPEVKEKALKLGANAYIPKPFDLEELMEVVEKLLN
362	MKSVLVVDDSEELRERISKALESRGYTVTWAPDGVAALEKLKEFTPDLIIVDLRMPKMDGLELLRILAEDPELRKIPVVVLSGDTSPEVEEECLAAGANAYVPKPFDLEELMAIVEKLLN
363	MKSVLLVDDSEELRKRISAALESRGYTVVYAPNGIEALEKLKEFLPDLIIVDLDMPPMNGFELLKILKNDEKLKEIPVIVLSRNTDPEVEKRCLELGADKYVPKPFDLDELMAIAEELLN
364	MKTVLVVDDSEELRKRITEALESEGYTVIWARDGVEALEKLEKQLPDLIICDLRMPPMDGLELLRVLAEDEERRKIPVVVLSADTDPEVEERCLAAGADAYVPKPFDLEELMEIVKKLLE
365	MKSVLLVDDSEELREEITKALEAEGLTVVLAENGEEALKKLEKFLPDLIIVDLDMPPMNGLELLKKLANDPELKKVPVVVLSRDTSPEVREEALKAGADAYVPKPFDLEELMAVVKELLE
366	MKSILLVDDSEELRKKIKEALESRGYKVKLARNGIEALEKLKEFLPDLIIVDLNMPPMNGFELLKILKEDEKLKNIPVIVISSDTSPEVKKEALELGADAYIPKPFDLEELMKVVEELLN
367	MKSVLLVDDSEELREQIAAALESRGYSVVFAPDGKEALKKLEKFLPDLIIVDLRMPEMDGLELLKILKNNEELKKIPVIVLSADTSPEVKEKALKLGANAYIPKPFDLEELMAVVEKMLN
368	MKSVLLVDDSEAEQERIAAALEAEGLTVKRAPDGIEALEKLKEFLPDLIILDLDMPKMDGFEVLKILKNDEKLKEIPVVVLSADTSPEVEKEALELGADAYVPKPYDLAELMAIVRELLE
369	MKSVLVVDDSEELRERITEALKSRGYTVVLAPDGIAALEKLKESLPDLIIVDLRMPPMDGFEFLKILKNNEELKKIPVVVLSADTSPEVEERCLEAGADAYVPKPFDLDELMEIIEKLLN
370	MKSILLVDDSEELREEISKALESRGYSVVLAPNGVEALKKLEEFLPDLIIVDLRMPPMDGLELLKRLKEDEELKKIPVIVLSRDKSPEVEKECLEAGANAYVPKPFDLEELMEIVEKLLN
371	MKTVLLVDDSEELRKRISEALESRGYKVVFAPDGIEALKKLEEFLPDLIIVDLRMPKMNGLELLKILKNNEKLKKIPVIVVSANTDPKIKEECLKLGASKYVPKPFDLDELMEVAEELLN
372	MKSILLVDDSEELRKLISEALESRGYTVTFARDGIEALEKLEKFLPDLIILDLRMPPMNGFEVLRILKNDEELKKIPVVVLSADTSPEVREEALKLGADAYVPKPFDLDELMEVVEKLLN
373	MKSILLVDDSEELRKEIAEALESRGYTVVFAPNGIEALEKLKKFLPDLIIVDLEMPPMNGFELLKILKNDEKLKNIPVIVLSSDTSPEVKEKCLKAGANKYIPKPFDLEELMEVVEELLN
374	MKSILLVDDSEELRERISAALESRGYTVRWARNGVEALEKLKEFLPDLIILDLRMPPMDGFELLKILKNNEELKKIPVIVLSADTDPEVEKRALELGADKYIPKPFDLEELMAVAEKMLN
375	MKSVLVVDDSEELRERITKALESRGYTVTWAPDGKEALEKLKEFLPDLIIVDLRMPPMDGFELLKILKEDEKLKNIPVIVLSADTSPEVEKKALEAGANAYIPKPFDLEELMAVAEKLLN
376	MKTILLVDDSEELRERIAAALESRGYKVVLAPDGVEALKKLEKFLPDLIIVDLRMPKMDGFELLRILKNDEKLKNIPVVVLSADTDPEVRQRALEAGANAYVPKPFDLEELMAIVEKLLN
377	MKSVLLVDDSEELQEEIAAALESRGLTVVRAPDGIAALKKLEEFLPDLIIVDLRMPPMDGLELLKRLKEDEKLKEIPVIVLSANTDPEVEKECLEAGANAYIPKPFDLEELMAVAEELLN
378	MKSVLLVDDSEELREEITAALESEGYSVTLAPDGIEALEKLKEFLPDLIIVDLRMPPMDGFELLKILKNDEKLKNIPVIVVSADTDPEVRERALELGANKYIPKPFDLEELMKVVKELLN
379	MKSVLLVDDSEELRKKIAAALESRGYSVVFAPDGVAALEKLEEFLPDLIILDLRMPPMDGFEVLRILKNDPELRKIPVVVLSADTTPEVRERALAAGADAYIPKPFDLEELMAVVEKLLN
380	MKSVLLVDDSEEEREEISKALKSRGYTVVYARDGVEALEKLKEFLPDLIIVDLRMPKMDGFELLKILKNDEKLKNIPVIVLSSRTDPEVKKKALEAGANKYVPKPYDLEELMAIADELLN
381	MKSVLLVDDSEELQARIAAALEAEGLTVIRARNGVEALEKLKKELPDLIIVDLRMPPMNGFELLKILKNDEKLKNIPVVVLSADTDPEVEKEALEAGADAYVPKPFDLAELMAVVRKLLN
382	MKTVLVVDDSEELRERITAALRSRGYTVILAPDGVAALEALKKQLPDLIILDLRMPPMDGFELLEVLKNDPALRKVPVVVLSADSSPEVRERALEAGADAYVPKPFDLDELMAVVERLLN
383	MKKILLVDDSEELQKEISEALKKEGYSVVFAPNGVEALEKLKKFLPDLIILDLRMPPMDGFTVLKILKENEELKKIPVIVLSGDTDPEVKEEALELGADYYVPKPFNLEELIEIAKKLLN
384	MKSVLLVDDSEEERERIAAALRARGYSVVFAPDGVEALEKLKKFLPDLIIVDLDMPPMDGFELLRVLKEDEELKKIPVVVLSRDTSPEVRERALEAGADAYVPKPFDLDELMAVVERLLN
385	MKSILLVDDSEELREKISKALKSEGYTVVYAPDGIEALKKLKEFLPDLIIVDLRMPPMDGFTLLEILKNDEELKKIPVIVLSGNTDPEVKERCLKLGANAYIPKPFDLEELIKVAKKLLN
386	MKSVLLVDDSEELRERISAALRSRGYTVIHAPDGVAALEKLKEQLPDLIIVDLDMPPMDGLELLRVLREDPELREIPVVVLSARTDPEVEREALEAGADAYIPKPFDLEELMAVVEELLN
387	MKSILLVDDSEELRKRIAEALESEGYTVVFARNGIEALEKLKEFLPDLIIVDLRMPPMDGFELLRILANDPELRKVPVVVLSADTSPEVRERALEAGADRYVPKPFDLEELIEVVRELLE
388	MKTVLVVDDSEELRKEITKALESEGYKVIWAPDGIEALEKLEKFKPDLIIVDLEMPKMNGLELLKKLKENEELKNIPVVVLSANTDPEVEKKCLEAGANAYVPKPFDLDELMEIVKKLLN
389	MKSVLVVDDSEELRKKIIEALESEGYKVVTARDGIEALEKLKEFLPDLIIVDLRMPPMDGFTLLKILKNDEKLRDIPVIVLSRDTSPEVEKKCLELGANAYIPKPFDLEELIKVAKELLN
390	MKTILLVDDSEKLREEISKALESEGYKVIFAKNGKEALEKLEKFLPDLIIVDLRMPEMNGFELLKKLKENEELKNIPVIVLSGDKSEEVKKEALEAGADKYVPKPFDLEELIEEVKKLLN
391	MKSILVVDDSEELRKKITKALEAEGYTVTLAPNGIEALEKLKEFLPDLIILDLRMPPMDGFTLLKTLKNDEKLKNIPVVVLSSDTSPEVEEEALKLGANKYVPKPFDLEELIKVVKELLE
392	MKRVLLVDDSEELREEIARALESRGYTVVFAPDGVAALRKLEEFRPDLIILDLRMPPLDGWEVLRRLAEDPELREIPVVVLSRDTDPEVRRRALEAGADAYVPKPFDLEELMAIVEELLN
393	MKTVLLVDDSEELREEITKALESEGYTVVTAPDGVAALEKLKKFLPDLIIVDLRMPKMNGEELLKILKNDEKLKNIPVVVLSRDTDPEVRERALKGGANAYIPKPFDLEELMAVVKKLLE
394	MKKVLVVDDSEELRKKITEALESEGWEVIWARNGIEALKKLEEFLPDLIIVDLRMPPMDGFTLLKILKNDPELKKIPVIVLSRDTDPEVEKKALEAGADAYIPKPFDLEELIEVAKKLLE
395	MKSILLVDDSEELRERIAKALESEGYTVTFAPDGKAALEKLKEFLPDLIICDLRMPEMDGLELLKILKEDEKLKKIPVVVLSRNTDPEMKERCLELGADAYVPKPFDLEELMEIVKKLLN
396	MKKVLVVDDSEELRKEITEALESRGYETILAPDGVAALEKLREFRPDLIIVDLRMPPMDGLELLRRLAEDEELRGIPVVVLSRDTDPEVRREALEAGADAYVPKPYDLDELMEIVEKLLN
397	MKSVLLVDDSEELRELISKALESKGYKVIRARDGIEALKKLEKELPDLIIVDLDMPPMNGFELLKILKENEELKKIPVVVLSRDTDPEVEERCLELGANAYIPKPFDLEELMKVVEKLLN
398	MKKVLLVDDSEELRKKISEALEKEGYEVVWAPNGVEALEKLKEFLPDLIIVDLDMPEMDGFELLKILKNDEKLKKIPVIVLSANTNPEIEKKALELGADKYVPKPFDLEELMKVAKELLE
399	MKSVLLVDDSEELQERIAEALEARGYTVVRAPDGVAALEKLKEFLPDLIIVDLRMPPMDGFTLLEILKNDPELREIPVIVLSADTDPEVERRALEAGADRYVPKPFDLEELLEVAEELLN
400	MKSVLLVDDSEELREKITAAIESRGYTVVTAPNGIEALEKLKKFLPDLIIVDLRMPPMDGFTLLKTLKENEELRKIPVVVLSRDTSPEVEKEALELGADKYVPKPFDLDELMAVIEELLN
401	MKKILVVDDSEELRKEITKALESRGYEVVWAPDGIAALEKLEEFLPDLIIVDLEMPPMNGFELLKKLKNDEKLKNIPVVVLSGDTSPEVRKKALELGANYYVPKPFDLDELMEIVEKLLN
402	MKSVLLVDDSEELQEKITKALESRGYTVVRAKNGIEALEKLKEFLPDLIIVDLDMPPMNGYELLKKLKNDEELKNIPVIVLSRDTSPEVEKKCLELGANAYVPKPFDLEELMEIVEKLLN
403	MKSVLLVDDSAELQEEISAALEAEGYTVTRAPDGVAALRALEERRPDLIIVDLDMPPMDGLELLRRLAEDPELRGIPVVVLSADTSPEVRRRALEAGADAYVPKPFDLEELMAVVRKLLE
404	MKSILLVDDSEEERKKISKALESEGYTVIYARDGIEALKKLEKFLPDLIILDLRMPKMDGLTLLKKLKNNEELKKIPVIVLSANKDPEVEEKCLKAGADKYVPKPYDLDELMEVVKKLLE
405	MKSVLLVDDSKEERERISAALEAEGYKVIWAENGVEALEKLKEQLPDLIIVDLRMPPMDGFELLKILKNDEKLKNIPVIVLSKDTDPEVEKEALEAGANAYVPKPYDLEELMAIAKKMLN
406	MKTVLVVDDSEEERKEITKALESRGYKVIWAPDGKEALEKLKKELPDLIILDLRMPEMDGFTLLKTLKNDEKLKKIPVVVISRDTSPEVEERALELGADKYIPKPYDLEELMKVIEELLN
407	MKSVLLVDDSEELRERIAAALKAEGLTVTLAPDGVEALEKLKEFKPDLIIVDLRMPEMNGFEFLKILKEDEELKNIPVIVLSADKSPEVEKECLELGANKYVPKPFDLDELMAVVKELLN
408	KKSILVVDDSEELREKITKALESEGYTVIWAPNGIEALKKLEKELPDLIIVDLRMPPMNGFELLKILKENEELKKIPVIVLSADTDPEVEKKALELGADKYVPKPFDLEELMKEVKKLLN
409	MKSILLVDDSEELREKITAALKAEGYTVITAPNGKEALEKLEKFLPDLIIVDLNMPDMNGFELLKILKNNEKLKKIPVVVLSSDTDPEVREKCLKLGANKYVPKPFDLEELMAIIRELLE
410	MKSVLLVDDSEELRERISEALRSRGYTVTFAPDGVAALEKLKKFLPDLIIVDLRMPPMNGLELLRILKNDEELKKVPVVVLSADTSPEVEKECLEAGADAYVPKPFDLEELMEIVEELLN
411	MKSVLLVDDSEALREEISRALKSRGYTVTYAPDGVAALEKLKKFTPDLIILDLRMPPMDGFEVLKILKNDEKLKNIPVIVLSRDTSPEVRKRALEAGANAYVPKPFDLDELMEIVEKLLN
412	MKSILVVDDSEELRKKITEALESEGYTVIWAPNGIEALEKLKEFKPDLIIVDLNMPPMNGFELLKILKEDEELKNIPVIVLSADTSEEVKEKCLKLGANKYIPKPFDLEELMKVVKELLN
413	KKSVLLVDDSEELARRIAAALEAEGLTVVWAPNGIEALEKLKEFLPDLIIVDLEMPPMNGLELLKILKEDEKLKKIPVVVLSRDTSPEVEKKALEAGADAYIPKPFDLEELMAVVRKLLE
414	MKSVLVVDDSEELRERITKALESRGLTVTWARNGIEALKKLEEFTPDLIILDLRMPPMDGFTLLKILKNDEKLREIPVVVLSGDTDPEVREEALAAGADRYVPKPFDLDELMAVVEELLN
415	MKSVLVVDDSEELRKEITEALEKEGLKVVLAKDGIEALKKLKEFLPDLIIVDLNMPKMNGLEFLKILKNDEKLKNIPVIVLSKDTSEEVKKKCLEAGADKYVPKPYDLEELMKEVKKLLN
416	MKTILLVDDSEELRKRISEALESRGYSVIWARNGVEALKKLEEFLPDLIICDLRMPPMDGFELLKVLKNDEKLKNIPVIVLSRDTSPEVEEECLKAGADKYVPKPFDLEELMAIVEELLN
417	MKSVLLVDDSEELREKISAALEAEGYTVRWAPDGLAALEALEEFLPDLIIVDLRMPPMDGLALLRRLAADPALREVPVLVLSRDTDPAVRERALAAGADAYVPKPFDLDELMEIVKELLE
418	MKSVLLVDDSEELRERIAAALESRGYTVVLAPNGVEALEKLEKFLPDLIIVDLEMPPMDGFTLLERLKNDPKLRKVPVIVLSRDTSPEVERRCLEAGADAYVPKPFDLDELMAVAERLLN
419	MKTILLVDDSEELREKIAKALESEGYKVIRAKDGIEALEKLKEFLPDLIIVDLKMPKMDGLELLKILKEDEKLKKIPVIVLSARKDPEVEKECLELGADKYIPKPFDLEELMAVVKEMLE
420	MKSILLVDDSEELREKISKALESKGYTVVFARNGIEALKKLEKFLPDLIILDLEMPPMNGLEVLKILKNNEKLKKIPVIVLSSDTSPEVKEKCLEAGANAYIPKPFDLEELMEVVEKLLN
421	MKSVLLVDDSEEERKEISEALEKEGLTVVWAENGVEALKKLEEFLPDLIIVDLEMPPMDGFEFLKKLKNDEKLKEIPVVVISRRTDPEVKKECLEAGADAYIPKPYDLEELMEVVKELLE
422	MKSILLVDDSEELRKKIAEALESEGYTVIFAPDGIEALEKLKEFLPDLIIVDLKMPKMDGFKLLEILKNDEKLKKIPVIVLSADTSPEVRERCLKAGADAYVPKPFDLEELMAIVKKLLN
423	MKTVLLVDDSEELRELIEKALRSRGLKVIRARDGIEALEKLKEFLPDLIILDLRMPPMDGYTLLKILKNDEELRKVPVVVVSGDTSPEVRERCLELGADAYVPKPFDLEELMAIVEELLE
424	MKKVLVVDDSEELRKKITEALKKEGLEVIWARDGEEALEKLEKEKPDLIIVDLRMPKMDGFELLRRLKEDEELREIPVVVLSSDTSPEVEEEALEAGADAYVPKPFDLEELMKIVKELLE
425	MKRVLLVDDSEALRRRITAALESRGYSVVWAPDGVAALEKLEAFLPDLIIVDLRMPPMDGLELLRRLAEDPELRGVPVVVLSRDTDPEVERRALEAGADAYVPKPFDLDELMAVVERLLE
426	MKSVLLVDDSEELARRIAAALEARGYTVVLAPDGVAALEKLKEFLPDLIIVDLRMPPMDGLELLKKLKEDEELKKVPVVVLSGDTSPEVEKECLEAGADAYVPKPFDLDELMAVVDELLE
427	MKSVLVVDDSEELRERITEALKSEGYTVVWAKDGIEALKKLEEFLPDLIIVDLEMPPMNGLEFLKKLKNNEKLKNIPVIVLSKNTDPEIKKKCLEAGANKYVPKPFDLDELMEIAKEMLN
428	MKSVLLVDDSEELRKKISEALESEGYTVTLAPDGVAALEKLKKFKPDLIILDLEMPPMDGFTVLKILKNDEELKNIPVIVLSRRTDPEVEQEALEAGANAYIPKPFDLEELMKVAKEMLN
429	MKKILLVDDSEEERKKISEALESRGYSVVWARNGIEALKKLEEFTPDLIIVDLRMPPMDGLELLKILKNNEELKKIPVIVISGDTSPEIKKKCLEAGANYYVPKPFDLEELMEIVEKLLN
430	MKSVLVVDDSEELRKEITEALEKEGLTVVWAPNGIEALEKLKKFLPDLIIVDLRMPPMNGFELLKILKNDEELKKIPVVVLSGDTSPEVEKRALEAGADKYVPKPFDLEELMEIVKELLE
431	MKSVLLVDDSEELRKEIKEALESRGYTVVEAPNGKEALEKLKEFLPDLIILDLRMPDMNGFEILKILKNDEELKKIPVIVISGDTDPEVEKKALEAGANAYIPKPFDLEELMEVVDKLLN
432	MKSVLLVDDSEELQKKITEALESEGYTVTLAKDGIEALEKLKEFLPDLIIIDLEMPPMNGFELLKKLKNDEKLKEIPVIVLSKNTDPEVKEKALEAGANAYVPKPFDLEELMEVVKKLLN
433	MKSVLLVDDSEELRKEISAALESEGLTVVFARDGVEALEKLKKFLPDLIIVDLDMPPMNGFEFLKILKNDEKLKKIPVVVLSKDTSPEVEKKCLELGANKYVPKPFDLDELMAIVKELLN
434	MKSVLLVDDSEEERERIAKALESRGYTVTFAPDGIAALEKLKEFLPDLIIVDLRMPPMDGFTLLKILKNDEKLKKIPVIVLSRDTNPEIEKKCLELGADKYIPKPFDLEELIEVIEKLLN
435	MKKVLLVDDSEELREKISKALKSEGYEVIFAPNGVEALEKLKEFKPDLIIVDLRMPEMDGFEFLKILKEDEELKNIPVIVISRNKSEEVKKEALEAGANKYVEKPFDLEELIKVAKELLN
436	MKKVLLVDDSEELAKKISEALESEGWEVVLAPDGVEALEKLKKFLPDLIIVDLEMPKMNGFELLKILKNDPKLKNIPVIVLSRRTDPEVRKKALELGADAYVPKPFDLEELIEIAKELLN
437	MKSILLVDDSERLRKEISKALESEGYTVIYARNGKEALEKLKEFLPDLIILDLRMPEMNGFELLKILKNDEERRNIPVIVLSSDTDPEVKKRCLELGANAYIPKPFDLKELMEVAKKLLN
438	MKKVLLVDDSEELQEKIEKALRSRGYEVIRAPDGKEALKKLKEFLPDLIIVDLRMPEMDGFELLKILKEDEELKKIPVVVLSADTSPEVRKRALELGANAYIPKPFDLEELMEVVEKLLN
439	MKKVLVVDDSEELRKKITEALKSEGLEVIEAPDGVAALEKLKEFLPDLIIVDLDMPPMNGYELLKILKNDEKLKEIPVVVLSRDTDPEVRQRCLELGANAYVPKPFDLEELMEIVKKLLN
440	MKSVLLVDDSEELQKEIAAALESRGYTVTLAPNGKAALEKLKEFTPDLIILDLEMPEMDGLEVLKVLKNDPKLKKVPVIVLSGNTDPEVEKKCLEAGANAYIPKPFDLEELMAVVEELLN
441	MKSVLLVDDSEELQERIAAALEAEGYSVIRAPDGVAALEKLKESLPDLIIVDLRMPPMDGFTLLEELKNDPELRKVPVIVLSADADPEVRERALKAGADAYVPKPFDLAELMAVARALLE
442	MKSVLLVDDSEELRKRISEALESRGYSVVFAPDGLSALEKLKEFLPDLIIVDLDMPPMNGLELLRILKEDPELKKIPVIVLSRDTSPEVEKEALEAGADAYVPKPFDLEELMEIAEELLN
443	MKKVLLVDDSEELRKRITEALESEGYEVIWAPDGIEALEKLKKFLPDLIIVDLKMPKMNGYELLKILKNNEKLKNIPVIVLSGDKSPEVEKKCLELGANKYVPKPFDLEELMEVVKKLLN
444	MKSILVVDDSEELREKITKALESEGYTVTWAPDGVAALEKLKEFTPDLIILDLRMPKMDGFTLLEKLKNDEELKNIPVIVLSGDTDPEVEKKALEAGADKYVPKPFDLEELMKIVKELLE
445	MKSVLLVDDSEELRREIAAALEARGYTVVWAPNGVEALEKLKEFLPDLIILDLRMPPMDGFEVLKKLAEDEELRGIPVVVLSADTSPEVRERALEAGADAYIPKPFDLDELMAVVEELLN
446	MKSVLLVDDSEELRERIAAALEAEGYTVTLARDGVEALKKLEEFLPDLIIVDLDMPPMNGLELLKILKNDPKLKEIPVIVLSADTSPEVEQKCLEAGADAYIPKPFDLDELMAVVRELLE
447	MKSVLLVDDSEELRKKISKAIESEGYTVIWAPNGVEALKKLEKFLPDLIILDLDMPPMNGFEVLKILKNNEELKKIPVIVLSANTDPEVKKKCLEAGADAYVPKPFDLEELMAIIKKMLN
448	MKSILLVDDSEELRKKISEALESEGYTVVFAKNGIEALEKLKEFLPDLIIVDLDMPPMNGLEFLKILKNDEKLKNIPVIVLSKNTDPEIKEKCLEAGADAYVPKPFDLDELMEIVKKKLN
449	MKSVLVVDDSEALRERITAALEAEGYTVVWAPDGVAALEALEERLPDLIIVDLRMPPLDGLALLRRLREDPALRGVPVVVLSRDRDPEVERRCLEAGADAYVPKPFDLEELMAVVRRLLE
450	MKSVLLVDDSEELRKEITEALESEGYTVVLAPDGVEALEKLEKFLPDLIIVDLRMPKMDGFELLEILKNNEELRKIPVIVLSADADPEVRERALKAGADAYVVKPFDLEELMAIVKELLE
451	MKSVLLVDDSEELRERIAAALEAEGWTVVWAPDGVEALRKLREFLPDLIIVDLRMPPMDGLELLRVLAEDEELRGIPVIVLSRDTSPEVRRRALEAGADAYIPKPFDLDELIAVARELLE
452	MKSVLVVDDSEELRRLITEALEAEGLTVVWAPNGVAALEKLEEFLPDLIIVDLDMPPMNGLELLKILKEDPERKKIPVVVLSGRTDPEVEQECLEGGADKYVPKPFDLDELMAVVRELLN
453	MKSVLLVDDSEELRERIAAALRARGYTVRLAPDGVAALELLKEFLPDLIIVDLRMPPMDGLELLRVLAEDPELRRVPVVVLSADRSPEVEREALEAGASAYVPKPFDLDELMAVVDALLN
454	MKSVLLVDDSEELQKEIKAALESRGYTVVLAPDGIEALEKLKEFLPDLIIVDLRMPKMDGFTLLEILKNDEKLKNIPVVVLSADTDPEVRERALKAGANAYVPKPFDLEELMAIVEKLLN
455	MKSVLLVDDSEELQERIAAALEAEGYTVVRAPDGVAALEALKKQLPDLIIVDLRMPPMDGLTLLEVLKNDEELKKIPVIVLSADTSPEVRQRALEAGANAYVPKPFDLEELMAIARKLLN
456	MKTVLLVDDSEELQDEIAAALEAEGYTVVRAPDGIAALEKLEEFLPDLIILDLDMPPMDGLELLRRLAADPELRKVPVVVLSADTDPEVRERALAAGADAYVPKPFDLEELMAVVRELLE
457	MKSVLVVDDSEELRERITRALESEGYTVRWAPDGVAALEKLKEFLPDLIIVDLRMPPMNGLELLKILKEDPELKEIPVIVLSADTSPEVEKRCLEAGADAYVPKPFDLEELMRIVRKLLN
458	MKSVLLVDDSAALRAKIKAALESRGYTVVEAPDGVAALEKLKEFTPDLIIVDLDMPPMDGFELLRVLREDEELRKVPVVVLSRDTDPEVRERALELGADAYIPKPFDLDELMAVVEELLN
459	MKSVLLVDDSEELRERIAAALESRGYSVVLARNGKEALEKLKEFLPDLIIVDLRMPDMNGFELLKILKNDEKLKNIPVIVLSADTDPEVEKKCLEAGADKYVPKPFDLDELMAVVEELLN
460	MKSVLVVDDSEEERKEITEALEKEGYKVVLAPDGISALEKLKKFLPDLIIVDLRMPPMDGFTLLKILKEDEKLKNIPVIVLSSDTSPEVEKEALELGADKYIPKPYDLEELMEVCKELLN
461	MKSVLLVDDSEELRERIAAALEAEGYTVTWAPNGVEALEKLEERLPDLIILDLDMPPMDGFALLRRLAADPELRGIPVLVLSADTDPAVRERALAAGADAYVPKPFDLAELLATVRALLS
462	MKSVLLVDDSEEERKEISEALESRGYKVVYAPNGEEALKKLEEFLPDLIIVDLRMPPMDGFEFLKKLKEDEKLKNIPVVVLSSDTDPEVEKRCLEAGANAYVPKPYDLEELMEICEKLLN
463	MKTVLLVDDSEELRKKIKKALESEGLKVIEAPDGIEALKKLEKFTPDLIIVDLRMPKMNGFELLKILKNNEKLKKIPVVVLSADKNPEVEKKALELGADKYIPKPFDLEELMKVVKELLE
464	MKSILLVDDSEELRKEISKALESKGYKVVFAKDGIEALEKLKKFLPDLIIVDLKMPKMDGFEFLKILKENEKLKNIPVIVISGNTDPEVKEKCLKLGANKYIPKPFDLEELIKVVEELLN
465	MKSVLLVDDSEKLRKEISKAIKSKGYTVVYAKDGIEALEKLKEFLPDLIILDLEMPPMNGFELLKILKEDEKLKKIPVVVLSRNTDPEVKERCLKLGADKYIPKPFDLEELMEVIEELLN
466	MKSVLLVDDSEELRKKISEALESRGYSVVLARDGKEALEKLEEFLPDLIIVDLDMPEMDGFELLKILKNDEKLKKIPVIVLSRDTSPEVRKKALELGADAYVPKPFDLEELMAIVEKLLN
467	MKKILLVDDSEELREKIAKALESEGYEVIFARNGIEALEKLKEFLPDLIIVDLRMPPMDGFEFLKILKNDEELKKIPVIVLSSDTSPEVKKECLEAGANAYVPKPFDLEELIEIVKKLLE
468	MKTVLVVDDSEELRERITAALRAEGLSVILAPDGVAALEALKERRPDLIILDLRMPPMDGLTVLRVLAEDPELRGVPVIVLSSDTSPEVRERCLAAGADAYVPKPFDLDELMAVARRLLN
469	MKSVLVVDDSEELRERITRALESEGLTVVWAPDGVEALKKLEEFLPDLIILDLRMPPMDGFELLKKLKNDEKLKKIPVIVLSADTDPEVEERCLKAGADAYIPKPFDLEELMRVAKELLE
470	MKSVLVVDDSEELRERITKALESRGYKVVWAPNGIEALEKLKKFLPDLIIVDLRMPPMDGFELLRILKNDPKLRKIPVVVLSADTDPEVEKRALEAGADAYIPKPFDLEELMEVVEKLLE
471	MKSVLLVDDSEELRERIAAALEAEGYTVVLAPDGVAALERLREQRPDLIIVDLRMPPMDGFELLRVLAEDPELREIPVVVLSADTSPEVRRRALEAGAHRYVPKPFDLEELMEVVRELLE
472	MKTVLLIDDSEELRERISKALESRGYKVIYAPDGKEALEKLKKFLPDLIILDLDMPPMNGFEVLKILKEDPELKNIPVIVLSRDTDPEVEKEALEAGADKYVPKPFDLEELMKIAEELLN
473	MKSILLVDDSEELRKKITKALESEGYTVITAPNGIEALEKLKEFLPDLIIVDLRMPKMDGFEFLKILKNDEKLKKIPVIVLSRDTDPEVKEKALELGANKYVPKPFDLEELMKIAKELLN
474	MKSILLVDDSEELRKKISKALESEGYKVIWAPDGVEALKKLEEFLPDLIILDLDMPPMDGFTVLKILAENEELRKIPVIVLSRDTSPEVRERALELGANAYVPKPFDLEELMKIVKKMLN
475	MKKVLLVDDSEELAKEIKKAIESEGYEVVLAPNGIEALKKLEEFLPDLIIVDLRMPPMNGLEFLKILKNNPELKKIPVIVISGDKSPEVEKECLEAGADAYIPKPFDLKELMEVIKKLLN
476	MKSVLLVDDSEELREKISKALESEGYTVIFAPDGVAALKKLEEFLPDLIICDLNMPPMNGFELLKTLKNDEKLKEIPVIVLSADTSEEVKKKCLELGANKYVPKPFDLNELIEEAKKLLN
477	MKSILLVDDSEELLEEISAALEAEGYTVVRARDGVEALKKLKEFTPDLIIVDLRMPPMDGLELLRVLREDPELRKVPVVVLSADASPEVERRCLEAGADAYVPKPFDLDELMAVVRELLN
478	MKSILLIDDSEALREKISKAIESEGYTVIYARDGIEALEKLKEFLPDLIILDLKMPPMDGFEVLKILKNDEKLKKIPVIVLSADKSPEVKKRCLEAGADAYIPKPFDLEELMKTIKKLLN
479	MKSVLLVDDSEEEREEISRALESRGYTVVYAPDGKEALEKLKEFLPDLIILDLKMPEMDGFTLLKILKNDEELKNIPVIVLSSNSDPEVKKKALEAGANAYIPKPYDLEELIKVAEELLN
480	MKTVLLVDDSEELRERITKALKSRGYTVIWAPDGISALEKLKKFLPDLIILDLDMPPMNGFEFLKILKNDEELKNIPVLVLSANSDPEVKKKALELGANKYVVKPFDLEELMEIVEELLN
481	MKSVLLVDDSEELRKKITEALESEGYTVTWAPDGIEALEKLKKSLPDLIIVDLRMPKMDGFELLKILKNDEKLKKIPVIVLSKDTSEEVKEKCLELGADAYVPKPFDLDELMKIVKKLLN
482	MKSVLLVDDSEEEREEISKALESRGYTVIFAPNGEEALRKLEEQRPDLIIVDLRMPPMDGFALLERLANDPELREIPVIVLSADTSPEVRERALAAGANAYVPKPYDLEELMEIAEKLLN
483	MKTVLVVDDSEKLRKIITEALEKEGLKVIWARNGKEALEKLKKFLPDLIICDLKMPEMDGLELLKILKNNEELKNIPVVVLSSDTTPEIKKKCLEAGANAYIPKPFDLEELMKVVKELLE
484	MKKVLLVDDSEELRKEISEALESRGYSVIWARDGIEALEKLKKELPDLIIVDLRMPKMNGFELLEILKNDEKLKKIPVVVLSSDTDPEVREKCLKAGANAYIPKPFDLEELMEVVDKLLN
485	MKKVLLVDDSEELRKKISEALESEGLSVVFAPDGIAALEKLKEFLPDLIILDLRMPPMDGREVLKILKEDEELRKIPVVVLSRDTSPEVEKECLELGADAYIPKPFDLEELMEVVKKLLN
486	MKSVLLVDDSEELREKIKKALESEGYKVILAKDGVEALEKLKEFLPDLIILDLKMPPMDGFTFLKILKNNEELKKIPVIVLSADTDPEVKEKCLKAGANAYVPKPFDLEELIKIAKKLLN
487	MKSILLVDDSEELRKKISEALKSKGYTVVFAPDGIAALEKLKKFTPDLIIVDLRMPPMDGFTLLRILKEDEELRKIPVVVLSRDTSPEVRKEALEAGADAYIPKPFDLDELMKVIEKLLN
488	MKSILLVDDSEELQEKISKALESRGYTVIRAPDGVAALEKLKEFLPDLIIVDLDMPPMNGFELLKIISENPELKKIPVVVLSRDTSPEVRERALKAGANAYVPKPFDLEELMKIVEKLLN
489	MKTVLLVDDSEELREKIEKALKSRGYSVIRAKDGIEALKKLEKFLPDLIILDLDMPPMNGFEVLKILKNNEELKNIPVIVISRDKSPEVKKKALELGANYYVPKPFDLEELMEIAEKLLN
490	MKSVLLVDDSEELREKISAALESRGYSVRWAPNGIEALEKLKEFLPDLIILDLRMPPMDGLEVLRVLKEDPELRKIPVVVLSADTSPEVRERCLEAGADAYVPKPFDLDELMAIVEELLN
491	MKSILLVDDSEELRKKISEALESRGYSVVFARNGIEALEKLKEFLPDLIILDLRMPPMDGFTVLKILKNDEELKKIPVVVLSADTSPEVKKRALELGANEYIPKPFDLEKLMEVVEKLLN
492	MKSVLLVDDSEELRREIAAALEAEGLTVVEAPDGIAALEKLKEFLPDLIIVDLRMPKMDGLTLLKILKEDEKLKKIPVVVLSADTSPEVREECLKAGADAYVPKPFDLAELMAIVRELLE
493	MKKILVVDDSEELRKKITEALKSEGYEVIWAPDGIEALEKLKKELPDLIIVDLRMPPMDGFTLLKILKNDEKLKKIPVIVLSRDTSEEVKKEALEAGANAYVPKPFDLEELMEVVKKLLN
494	MKSVLLVDDSEELRERISKALESKGYTVTFAKNGVEALEKLKKSLPDLIIVDLDMPPMDGFTLLEKLKNDEKLKKIPVIVLSGDKSEEVKKRCLEAGANAYIPKPFDLEELMEVVEKLLN
495	MKKVLLVDDSEELREEISKALESRGYEVIWARNGIEALKKLEEFLPDLIILDLEMPPMNGFELLKILKNNEKLKKIPVIVLSRDKSPEVEKKCLELGANKYIPKPFDLEELMKVAEELLN
496	MKSILLVDDSEELRKKISEALKSKGYSVVFAPNGIEALEKLKKFLPDLIIVDLNMPPMDGLTLLKELKNDEKLKKIPVVVLSRNTDPEVKEECLKAGADAYIPKPFDLEELMKVVEKLLN
497	MKSVLVVDDSEELRERITAALRSRGYSVVWAPDGVAALEKLEKFLPDLIIVDLRMPPMDGLTLLKILKENEKLKNIPVVVLSRDTSPEVEKEALEAGANAYIPKPFDLDELMAVVDKLLN
498	MKSVLLVDDSEELRERITAALKSEGLKVVLAPDGVEALEKLKEFLPDLIIVDLDMPPMNGLELLKILKENEELKNIPVIVLSANTDPEVEEKCLAAGANAYIPKPFDLEELMAVVKKMLN
499	MKSVLLVDDSEELRKLISEALESRGYTVTFARNGKEALEKLKKFTPDLIIVDLNMPDMDGFTLLKILKNDEKLKNIPVIVISGRTDPEVKEKCLEAGANAYIPKPFDLEELIKVAERLLN
500	MKSVLLVDDSEELRKKISEALESEGYTVTFARDGVEALEKLKEFLPDLIIVDLDMPPMDGFTLLEILKNDPELRKVPVLVLSADTSPEVRERALEAGADAYVPKPFDLEELMEVVRELLN
501	MKKVLLVDDSEALREEISAALRSRGYEVVFARDGVEALEKLKEFLPDLIIVDLRMPPMDGFELLRVLKNDEKLRDIPVVVISADTSPEVKERCLEAGADAYVPKPFDLDELMAIVDELLN
502	MKKILLVDDSEELRKLISEALKARGYSVVFAPDGKAALKKLEEFLPDLIILDLDMPEMDGFEVLEILKNDEKLKDIPVIVLSRDTSPEVEERALKAGANAYVPKPFDLDELMAIADKLLN
503	MKTVLLVDDSEELQEEITKALESEGYKVIRARDGKEALEKLEKFLPDLIIVDLRMPEMDGFELLKILKNDEKLKNIPVIVLSSDTSPEVEKEALELGANAYIPKPFDLEELIEVVKKLLN
504	MKSVLLVDDSEEERERISKALRSRGYKVIWAPDGVEALEKLKEFLPDLIIVDLDMPPMDGLELLKILKNDEKLKEIPVIVLSRDTTPEVREKALEAGADAYVPKPYDLEELMEIVEKLLN
505	MKSILLVDDSEELREEIAAALKSEGYTVVFAPDGVAALEKLKEFTPDLIIVDLRMPEMDGFELLKRLKEDPELRKVPVVVLSADTSPEVRKRALEAGADAYIPKPFDLDELMAVVKKLLN
506	MKSVLLVDDSEELRKKIAEALESEGLTVIFAPDGVAALEALEKQLPDLIIVDLDMPPMDGLELLRRLASDPELRGIPVLVLSRRTDPEVERECLEAGADAYVPKPFDLEELMAVARELLN
507	MKSVLVVDDSEELRKEITAALESEGYTVIEAPDGVAALEALERQRPDLIIVDLDMPPMDGFELLRRLAEDPELRKIPVVVLSARTDPEVRERALAAGADRYVPKPFDLEELMAIVKELLE
508	MKSILLVDDSEELRKKISEALESKGYKVIFAPDGEEALKKLEKFTPDLIIVDLRMPKMNGLELLKKLKNDEKLKKIPVVVLSRDTSPEVKEKCLKAGANAYIPKPFDLEELMKVVEKLLN
509	MKKVLVVDDSEELREKITKALKSEGYEVVLAPNGIEALKKLEEFLPDLIIVDLRMPEMDGYELLKILKNNEKLKNIPVVVISGNKDPEVEKKALELGANKYVPKPFDLEELIKIIKELLN
510	MKKVLLVDDSEELQERIERALRSEGLEVVRARNGVEALEKLKEFTPDLIIVDLDMPPMDGFELLKILAEDEKLKKVPVVVLSRRTDPEVEERCLEAGANAYVPKPFDLEELMRVVRELLN
511	MKSILVVDDSEELREKITAALESRGYTVVLARDGVEALKKLEEFLPDLIIVDLRMPKMDGFELLKKLKEDEKLKNIPVVVLSRNKDPEVEEEALKAGANAYVPKPFDLEELMAIVEELLN
512	MKTVLLVDDSEELREEIAAALESEGLKVVLAPDGVAALEKLKEFLPDLIIVDLDMPPMNGLELLRTLRENEELRKIPVIVLSRDTSPEVRERALEAGADAYVPKPFDLEELMEVVKKLLN
513	KKSVLLVDDSEELQKEISKALESKGYTVILARDGIEALEKLEKFLPDLIILDLDMPPMNGFEVLKILKNNPELKKIPVIVLSGDTSPEVEKEALEAGADAYVPKPFDLEELMKIVEEKLN
514	MKSVLLVDDSEELAERIRAALESRGYTVTLARNGVEALEKLEKSLPDLIIVDLRMPPMNGFEFLRILKENEELRKIPVVVLSGDTDPEVRERALEAGADAYVPKPFDLDELMAVVEELLN
515	MKKILLVDDSEEERERIKAALESRGYEVIEARNGIEALKKLEEFKPDLIIVDLEMPPMNGYELLKILKEDEEWKEIPVVVLSKDTSPEVEEKCLELGADAYIPKPFDLDELMAVVEELLN
516	MKKVLLVDDSEELRKEIKEALESEGYEVIEARDGIEALEKLKEFLPDLIIVDLRMPPMNGFELLKILKNDEKLKKIPVIVLSRDKSPEVEKEALELGADAYVPKPFDLEELIRIAKELLN
517	MKSILLVDDSEELRRRIAAALEARGYTVVFAPDGKAALEKLEKFLPDLIIVDLRMPEMDGFELLRILKNDPKLKEIPVVVLSADTDPEVEERALELGANAYVPKPFDLDELMAVVERLLN
518	MKSVLLVDDSEELRKRISEALESEGYTVVWAPDGIEALKKLEEFLPDLIIVDLRMPPMNGFELLKILKNNEKLKKIPVIVISGDTSPEVEKECLELGADKYVPKPFDLDELMKIVKELLN
519	MKSILVVDDSEELRKRITEALESEGYTVIWAPNGIEALEKLEKSLPDLIIVDLEMPPMNGLELLEKLKNDPELKKVPVVVLSSRTDPEVEERCLKAGANAYVPKPFDLEELMAVVKKLLN
520	MKSVLLVDDSEELREKITKALESEGYTVVTAPNGVEALKKLEEFLPDLIILDLRMPPMDGFEVLKKLKEDEELKEIPVVVLSSDTSPEVEKKALEAGANAYIPKPFDLEELMKVVKELLN
521	MKSVLVVDDSEELREKITAALESKGYKVIWARNGKEALEKLKKELPDLIIVDLRMPPMDGFELLKILKNDEKLKNIPVIVLSGDTSPEVEEECLKLGANAYIPKPFDLEELMEVVDKLLN
522	MKSVLVVDDSEEERELITKALESEGLTTVWAPNGIEALKKLEEFLPDLIIVDLRMPPMNGLEFLKILKNNPELKEIPVIVLSADTSPEVEKKALEAGADKYVPKPFDLEELMEIVKELLE
523	MKSILLVDDSEELRRKISEALESEGYTVVFARDGIEALKKLEKFLPDLIIVDLRMPPMNGFELLKILKNDEKLKNIPVIVLSADTSPEVKEKCLELGANYYVPKPFDLEELMEIAKKLLN
524	MKKVLLVDDSEELREKISKALESKGYEVITAKDGIEALKKLEEFLPDLIILDLRMPPMNGFELLKKLKNNEELKKIPVIVLSANTDPEVKEEALKLGADAYVPKPFDLDELMEVAEKMLN
525	MKSVLLVDDSEELREKITKALESEGLTVIRARDGIEALEKLKKSLPDLIIVDLRMPKMDGFTLLKILKEDEKLKKIPVIVLSADTDPEVEKRALEAGADAYIPKPFDLEELMEVVKKLLN
526	MKSVLLVDDSEELREKISKALESRGYTVTYAPDGVAALEKLKEFLPDLIIVDLDMPKMDGFTLLRILKNDEKLKNIPVIVLSRDTSPEVRERCLKLGANAYVPKPFDLEELMKIAEKLLN
527	MKTVLVVDDSEELREKITKALESRGYKVILAPNGIAALKELEKQLPDLIILDLEMPEMDGLELLKVLKNNEKLKKVPVIVLSRNRDPEVKKRCLEAGANAYVPKPFDLEELMEIVEKLLN
528	MKKVLLVDDSEELRKKITKALESRGYEVIWAPDGVEALKKLEEFLPDLIIVDLEMPKMNGLELLKILKENEELKNIPVIVLSSNKNPEIEKECLEAGANYYIPKPFDLEELMEVVEKLLN
529	MKTVLLVDDSEELRKIISEAIESEGYKVIWAPDGVEALEKLKEFKPDLIIVDLRMPKMDGFELLRILKEDEELKEIPVIVLSADTDPEVEKEALEAGADAYVPKPFDLDELMEIAKKMLE
530	MKSVLLVDDSEELRARIAAALESRGYTVTLAPDGVAALEKLKESLPDLIIVDLEMPPMDGFTLLETLANDPELRKVPVIVLSRDTDPEVRERCLKAGADAYIPKPFDLEELMAVADELLN
531	MKSVLVVDDSEELRKRITEALESEGYSVVLAPDGIEALKKLKEFLPDLIIVDLKMPKMDGFTLLKILKEDPKLKKIPVIVLSGDTSPEVEKKALELGADAYIPKPFDLEELIEVAKKLLN
532	MKTVLLVDDSEELRERIKRALESRGYKVVLARNGIEALEKLKKFLPDLIIVDLRMPPMDGFELLKILKNDEKLKKIPVIVLSADTSPEVAERCLELGADKYIPKPFDLEELMEVAEELLN
533	MKSILLVDDSEELREKIKKALESRGYTVVEAPDGIEALEKLKEFLPDLIILDLEMPPMDGFEVLKTLKENEELKKIPVVVLSRDSSPEVEKRALEAGADAYVPKPFDLDELMEVVEKLLN
534	MKSVLVVDDSEELRERITAALESEGYTVVWAPDGVAALEKLEEFLPDLIIVDLRMPPMDGFTLLKILKNDEKLRNIPVVVLSGDTDPEVEKRALEAGANAYVPKPFDLEELMAVVKKLLN
535	MKSVLLVDDSEELQEKITKALESRGYTVVRAPDGEEALEKLKEFLPDLIIVDLEMPKMNGFELLKILKENEELKKIPVIVLSRNTDPEVRKKALELGADKYVPKPFDLEELMEVVDELLN
536	MKSVLLVDDSEELRERIAEALEAEGWSVVWAPDGVEALRKLEEFLPDLIIVDLDMPPMDGLALLRRLRNDPRLREIPVIVLSADTDPEVRERCLAAGADAYIPKPFDLEELVEVARELLE
537	MKRVLLVDDSEELRERIRAALESRGYEVVYAPDGVAALEKLEEFLPDLIIVDLRMPPMDGFELLERLKNDPELRKVPVVVLSADTDPEVRRRALEAGADRYVPKPFDLEELMAVVEELLN
538	MKSVLVVDDSEELRKEITAALEAEGLTVVWARDGIEALEKLKEFRPDLIIVDLEMPPMNGFELLRILKEDEELREIPVVVLSKRTDPEVEREALEAGADAYVPKPFDLDELMAVVRELLE
539	MKTILLVDDSEELRKKIKEALESEGYKVILAKNGVEALEKLKEFLPDLIIVDLDMPPMNGLELLKTLKNDEKLKNIPVVVLSRDTDPEVRERCLEAGANAYVPKPFDLEELMEVVKKLLN
540	MKSVLLVDDSEELREKIKKAIESKGYSVVLARDGVEALEKLKEFLPDLIIVDLRMPPMDGFTLLRILKNDPKLRKIPVLVLSRDEDPEVEKRALELGADAYVPKPFDLEELMEIIEKLLN
541	MKSVLLVDDSEELRERIAAALRAEGYTVVFARNGKEALEKLKEFLPDLIIVDLDMPEMDGFEFLKILKEDEKLKEIPVVVLSRDTSPEVRERCLEAGADAYVPKPFDLDELMAVVRRLLE
542	MKTVLLVDDSEELRAEIAAALEAEGYTVVFAPDGIAALEKLKKFLPDLIIVDLRMPPMDGYTLLKILKNDEKLKNIPVIVLSADTSPEVEEKALKLGANAYIPKPFDLEELMAVARKLLN
543	MKKVLVVDDSEELREEITKALESRGYEVVLAPDGVAALEKLKKFLPDLIIVDLDMPPMDGLELLRVLAEDPELRKVPVIVLSADTSPEVRQRALEAGADAYIPKPFDLEELIEVAEKLLN
544	MKSVLVVDDSEELRKRITEALESEGLTTVWARDGIEALEKLKEFLPDLIIVDLDMPKMDGLTLLKELKNDEKLKKIPVVVVSRDTSPEVEKECLEAGADKYIPKPFDLEELMEVVKELLN
545	MKSVLLVDDSEELRERITAALESEGLTVVRAPDGVEALRRLEEFLPDLIIVDLDMPPMDGLELLRRLAEDPELRKIPVVVLSRDTSPEVRRRCLEAGASAYVPKPFDLEELMEIVRKLLN
546	MKSILVVDDSEELREKITKALESEGYSVVWAPDGIEALEKLKKFLPDLIILDLRMPPMNGLEVLRILKNDEELKNIPVIVLSADTSPEVRKECLEAGADAYIPKPFDLDELMAVVKKLLE
547	MKSILLVDDSEELRKKISEALKSRGYTVTFAPDGVEALKKLEEFLPDLIIVDLKMPKMDGFELLKKLKNDPKLKKIPVIVLSRNKDPEVREECLKLGADYYVPKPFDLEELMKIVEKLLN
548	MKSVLLVDDSEELRKEISEALESRGYTVTWAPDGVAALEKLEEFLPDLIILDLRMPPMDGFELLRRLREDPELRDIPVIVLSADTSPEVRERALEAGADAYIPKPFDLEELMEVAEELLN
549	MKKVLLVDDSEELREEIKKALESRGLSVIEARDGVEALEKLREELPDLIILDLRMPPMDGFTLLRRLAEDPELREIPVVVLSSDTSPEVRQRALEAGANAYIPKPFDLDELMEVIEKLLN
550	MKSVLLVDDSEELQEEITKALESEGLKVIRAPDGIAALEKLKEFLPDLIIVDLRMPPMDGYELLKILKEDEKLKKIPVIVLSSDTDPEVEKKCLELGADKYVPKPFDLEELMAVVKELLE
551	MKTVLLVDDSEELRERIAAALEAEGYRVILARDGVEALEKLKEQLPDLIIVDLRMPPMDGFELLRELAEDEELRKVPVIVLSADTDPEVRRRALEAGADAYVPKPFDLEELMAVARELLE
552	MKSVLLVDDSEELRERIAAALRARGYSVVLARDGVEALRKLEEFTPDLIILDLRMPPMDGLALLERLRNDPELRKVPVIVLSADTSPEVERRCLEAGADAYIPKPFDLDELMAVAERLLN
553	MKSILLVDDSEELREKITKAIESRGYTVTLARDGIEALEKLKEFTPDLIILDLDMPKMNGFELLKILKEDPKLKNIPVIVVSARTDPEVEEEALKLGADKYIPKPFDLEELMEVIEEMLE
554	MKSVLLVDDSEELRERISAALRARGYTVVHAPDGIAALEKLKEFLPDLIIVDLRMPPMDGFTLLKILKNDPKLRKIPVVVLSADTSPEVEKECLEAGADAYVPKPFDLDELMAIVDELLN
555	MKRVLLVDDSEELRERISKALESEGLEVVLARDGKEALEKLKEFLPDLIIVDLEMPEMDGYELLRVLKNDEELRKVPVVVLSANTDPEERQRALELGANAYVPKPFDLEELMEIVKKLLN
556	MKSILLVDDSEELREKIKKALESEGYKVVFARNGIEALEKLKEFLPDLIILDLRMPPMNGFELLKILKNNEELKKIPVIVISRNTDPEVKKRALELGADAYIPKPFDLEELIKVVKELLE
557	MKSVLLVDDSEELRERIAAALEAEGLSVVFAPNGVEALEKLKEFLPDLIIVDLDMPPMNGLELLKILKNDEKLKKIPVVVLSRDTSPEVEQKALEAGADAYVPKPFDLEELMAVVRALLE
558	MKSVLVVDDSEELREEITKALESEGYSVVWAPDGVEALEKLKEFRPDLIIVDLRMPPMDGYELLEILKNDEELKEIPVIVLSADTSPEVRKRALELGANAYVPKPFDLKELIEIAKKLLN
559	MKSVLLVDDSEEERKEIAEALESRGYTVTFAPDGKAALEKLKKFLPDLIIVDLDMPEMDGFELLKILKSDEKLKKIPVIVLSRDTSPEVEKRCLEAGANAYVPKPYDLEELIEVAEKLLN
560	MKKILLVDDSEELRKKIKEALESRGYSVVFARDGIEALKKLKEFLPDLIIVDLEMPPMNGYELLKILKENEELKKIPVVVLSSDTSPEVEKKALELGANKYIPKPFDLEELMEVIEKLLN
561	MKRVLLVDDSEELRERIAAALESRGLTVVLAPDGVEALEKLREFTPDLIIVDLRMPPMDGFTLLRVLAEDPELRGVPVVVLSRDTSPEVRERALAAGADAYVPKPFDLEELMAVVERLLS
562	MKSVLLVDDSEEERERISAALRSRGYTVTYARDGVEALEKLKKFLPDLIIVDLRMPEMDGLELLRVLREDPKLREIPVIVLSGNTDPEVERRCLEAGADRYVPKPYDLEELMAVAEELLN
563	MKSILVVDDSEELRKEITKALESKGYKVVWARNGIEALEKLEKFLPDLIIVDLEMPPMDGFELLKILKNNPKLKKIPVIVISRNKDPEVEERCLKAGANAYVPKPFDLEELMEIVEKLLN
564	MKKVLLVDDSEELRKKISEALKSKGYEVIFARNGIEALEKLKKFLPDLIIVDLNMPPMNGFELLKILKNDPKLKNIPVIVLSRDTSPEVKKRALEGGANYYVPKPFDLEELMEIAEKLLN
565	MKKVLLVDDSEELRERIAAALESRGYEVIWARNGIEALEKLKEFLPDLIIVDLDMPPMDGFELLEILKNDEKLREIPVVVVSARTDPEVEERALEAGADAYVPKPFDLEELMAVVDELLE
566	MKRVLLVDDSEELARRIKAALESRGLEVVLAPDGVAALEKLEAFLPDLIIVDLRMPPMDGFELLRRLAADPELRGIPVVVLSADTDPEVRERCLAAGADAYVPKPFDLEELMAIVEKLLE
567	MKSVLLVDDSEELRKKIAEALESEGYTVIFAPDGIEALKKLEKELPDLIIVDLDMPKMNGFELLKILKENEKLKNIPVIVLSRDTNPEVKEKALKLGANKYVPKPFDLEELMKIVKELLN
568	MKKVLLVDDSEELREKISKALKSRGYEVIWAPDGVEALKKLEKELPDLIILDLRMPEMDGLELLRRLREDPELREIPVVVLSADASPEVRRRCLEAGADAYVVKPFDLEELMAVVEELLN
569	MKSVLLVDDSEELRERIAEALRSRGYTVVWARNGIEALEKLKEFLPDLIILDLRMPPMDGLEVLRILKEDPALRKVPVVVLSGDTSPEVEEEALRAGADAYVPKPFDLEELMEVVERLLN
570	MKTVLLVDDSEELRKLITEALESEGYKVIEAKDGVEALEKLKKELPDLIIVDLRMPKMNGFELLKILKEDEKLKNIPVIVLSSDRSPEVEKEALELGADKYVPKPFDLEELMEVVKKLLE
571	MKTVLVVDDSEELREKITKALESEGLKVVWAPNGIEALEKLKEFLPDLIIVDLRMPPMDGWTLLEILKNNEELKNIPVVVLSGDKSPEVKKRALEAGANYYVPKPFDLEELIKVIKKLLN
572	MKSVLLVDDSEELREEISAALESEGYTVTYAPDGIAALKKLEEFLPDLIIVDLRMPPMDGFTLLKILKNDEKLKKIPVVVLSADTDPEVEKRALEAGANAYIPKPFDLEELMAVVKKLLE
573	MKKILLVDDSEELRKKIKEALESKGYEVIFAPNGIEALKKLEKFLPDLIIVDLEMPPMDGFTLLKILKNNEKLRKIPVIVLSADTSPEVKKRCLELGADAYIPKPFDLEELMEVIEKLLN
574	MKSILLVDDSEELRKLISEALESRGYTVTWAKDGKEALEKLKEFKPDLIICDLRMPEMDGFELLKILKNDEELKNIPVVVISRDTSEEVKEKALEAGADKYVPKPFDLEELMEIVEELLN
575	MKSVLLVDDSEELREKIRKALESEGLTVVFAPNGIEALKKLEEFLPDLIIVDLEMPPMNGLELLKILKNNEKLKEIPVIVLSRDESPEVKKKCLEAGANKYVPKPFDLEELMAIVKELLN
576	MKSILVVDDSEELRKRITEALESRGYTVIWAPDGIAALEKLKKQLPDLIIVDLRMPPMDGFELLRILKNDPELKKIPVLVISKDTSPEVKERALEAGADAYVPKPFDLEELMAVVEKLLN
577	MKSILLVDDSEELREKIKKALESRGYTVVYAKDGKEALKKLEKFLPDLIIIDLKMPEMDGFTLLKILKNNEKLKKIPVIVLSADTDPEVKEEALKLGANAYIPKPFDLDELMEVIEKLLN
578	MKTILVVDDSEELREEITKALESEGYSVVWARNGIEALEKLKKFLPDLIIVDLEMPEMDGLELLKILKNDEKLKNIPVIVLSANTDPEIEKRCLEAGANAYVPKPFDLEELMEIVKKMLN
579	MKKVLLVDDSEELREKISKALESEGYSVVYARNGIEALEKLKKFLPDLIIVDLNMPPMDGLELLKILKENEELKNIPVIVISADTDPEIEKKCLEAGANAYIPKPFDLEELIEVAKKLLE
580	MKSVLLVDDSEELREEISAALEAEGLTVRWARDGIEALRLLEEFLPDLIIVDLRMPPMDGYELLRRLAEDPELRRIPVLVLSADTSPEEEERALRLGATAYVPKPFDLEELMAVVRELLE
581	MKTVLLVDDSEELRKKISEALESEGYSVIFAPNGIEALEKLEKQLPDLIIVDLRMPPMNGFELLKKLKNDEKLKNIPVIVLSGDKSPEVEKRCLEAGANKYIPKPFDLKELMEVCKKLLN
582	MKKILLVDDSEELRKEIAKALESEGYTVVFARNGIEALEKLKEFTPDLIILDLRMPPMDGFTLLKILKNDEKLKNIPVIVLSGDTSPEVKERCLKAGANAYIPKPFDLEELIEVVKKLLN
583	MKSILLVDDSEEEREKIAAALRSRGYTVIYAPNGVEALKKLEEFLPDLIIVDLRMPPMDGFTLLERLKNDPELRKIPVLVLSADTSPEVEKRCLEAGADAYVPKPYDLEELMAIVEKLLN
584	MKKILLVDDSEELREEISKAIESEGYSVIWAPNGKEALKKLEKFLPDLIILDLNMPEMNGYELLKKLKNNEELKNIPVVVLSRDKSPEVKERCLKLGANKYVPKPYDLEELMEIIKKLLN
585	MKSVLLVDDSEELREEIAAALRSRGYTVTFARDGIEALEKLEKFLPDLIILDLDMPKMNGFELLKKLKENEELKKIPVIVLSADTDPEVKEKALEAGADKYVPKPFDLDELMAVADEMLN
586	MKTVLLVDDSEELRKRIAKALEAEGLKVVFAPDGIEALEKLKEFLPDLIIVDLRMPPMDGFELLKILKNNPKLKKIPVVVISSDTSPEVEKKALEAGANKYVPKPFDLEELMEVVKELLN
587	MKSILLVDDSEELRKIITEALESEGYTVTTAPNGKAALEKLEKFLPDLIILDLRMPDMDGLTLLKILKNNEKLKNIPVIVLSADTDPEVRKECLEAGADAYVPKPFDLEELIKIIKKKLN
588	MKSVLLVDDSEEERKRIAEALESEGYTVTLARDGVEALRKLEEQLPDLIIVDLRMPPMDGYELLRRLREDERLRGIPVVVLSANTDPEERERALELGADRYVPKPYDLEELMAVVRELLE
589	MKSILLVDDSEELQKKIKEALESEGYTVVLARNGVEALEKLKEFLPDLIILDLRMPPMDGFTLLRELKENEELKKIPVIVLSGDTDPEVERRCLEAGADAYIPKPFDLEELMKVVKELLN
590	MKSVLLVDDSEEEREKISAALKSRGYTVTWAPDGISALEKLKEFLPDLIILDLRMPPMDGFELLKILKEDEKLKNIPVIVLSSRRDPEVEEEALKLGADKYVPKPYDLEELMEVVEELLN
591	MKSVLLVDDSEEERKEISAALESEGYTVVYAPDGIAALEKLEKFLPDLIIVDLDMPKMNGFELLKKLKNDEKLKKIPVIVLSGNTDPEVKKKCLELGADAYIPKPYDLEELMAVARRLLN
592	MKSVLLVDDSEELRKKISKAIESEGYTVVWAPDGIEALEKLKKFLPDLIIVDLEMPKMNGFELLKILKNDEKLKNIPVVVLSKDTSEEVKKEALELGANKYIPKPFDLEELMKVIKELLN
593	MKSVLLVDDSEELRERISKALESEGYTVTWARDGIEALEKLKEFLPDLIIVDLRMPPMNGFELLKILKEDEKLKKIPVIVLSRNTDPEVKEKALELGADKYVPKPFDLEELMKIAKELLN
594	MKTILVVDDSEELREEITKALKSRGYKVVWARDGVEALEKLKEFLPDLIIVDLEMPPMDGFELLKTLKNDEKLREIPVIVLSSDTSPEVRERCLKLGANKYVPKPFDLEELMKVVEELLN
595	MKSVLLVDDSEELQERITAALESRGYTVVRAPDGVAALEKLKEFLPDLIIVDLEMPEMNGFELLEKLKNDEKLKKIPVIVLSADTSPEVRKRALEAGADAYVPKPFDLDELMAVAERLLN
596	MKKVLLVDDSEELRKEISKALESEGYEVVWAKNGVEALEKLKEFLPDLIILDLRMPPMDGFEVLKILKNDEELKNIPVIVLSRDKTPEVEKKALELGANAYIPKPFDLDELMKVVKELLN
597	MKSVLLVDDSEELREKIKKALESEGYTVILARNGKEALEKLKKFLPDLIIVDLEMPEMNGYELLKILKNDEKLKKIPVIVISRNTNEEVKKKCLEGGANAYIPKPFNLEELIEVAKKLLE
598	MKSVLLVDDSEELRKKISKALESKGYKVVFAPDGIEALEKLEKFLPDLIIVDLRMPKMNGFEFLEKLKNNEKLKKIPVIVISRDKSPEVEKKALEKGANAYIPKPFDLEELIKEAEKLLN
599	MKKVLLVDDSEELRKRIAEALESKGYSVIFAPDGIEALKKLEEFLPDLIIVDLRMPKMNGFELLKILKNDEERKDIPVIVLSADTDPEVEEKALEAGADAYIPKPFDLEELMAVADKLLN
600	MKKVLLVDDSEELRKEISKAIESRGYTVVYAPNGEAALKKLEEFLPDLIILDLRMPPMDGFEVLKRLKEDEKLKNIPVIVLSKDTDPEVKERCLKGGADAYIPKPFDLEELMKTIEKLLN
601	MKSVLVVDDSEELRAEITAALEAEGYTTVLARDGIEALKKLEEFLPDLIIVDLEMPEMDGLELLKILKEDEKLKKIPVVVISRDKSPEVEEECLKAGANAYVPKPFDLDELIAIVKKLLN
602	MKKVLVVDDSEEERKKITEALESRGYEVVWAPDGIAALEKLEEFLPDLIIVDLDMPPMDGFTLLKKLKEDEKLKEIPVVVLSRDTSPEVKKKALEAGANAYVPKPFDLEELMKVVEKLLN
603	MKTVLLVDDSEELRERIAAALEARGYRVVRAPDGVEALKKLEKFLPDLIILDLDMPPMDGLEVLRRLAEDPELRGVPVVVLSARTDPEVREEALAAGASAYVPKPFDLDELMAVVERLLN
604	MKSVLLVDDSEELREKISKALESEGLTVIFARNGKEALEKLKEFLPDLIIIDLDMPPMNGLELLKILKNNEELKKIPVIVISRDKSPEVEKKCLEAGANKYIPKPFDLEELMEVVKELLE
605	MKSVLLVDDSEELRKKIAEALESEGYKVIFAPDGIAALEKLKKFTPDLIIVDLRMPKMDGFTLLKILKNDEKLKNIPVIVLSSDKSPEVKKEALELGANKYIPKPFDLEELMEVAKKLLE
606	MKTILLVDDSEELRKKIEAALKSRGYKVIRAPDGIAALEKLKKFLPDLIIVDLKMPKMDGLTLLKILKNNEKLKNIPVIVLSSDKSEEIKKKCLEAGANYYVPKPFDLEELMKVVEKLLN
607	MKTVLLVDDSEEERERIAAALESRGLKVVRAPDGVAALEKLEEFTPDLIIVDLRMPPMDGFELLRRLREDERLRKVPVVVLSADTDPEVRERALRLGADAYVPKPYDLDELMAVVERLLN
608	MKSVLVVDDSEELREKITKALESRGYTVVWAPDGIEALEKLKEFLPDLIIVDLDMPPMNGLELLKILKNDPELKNIPVIVLSGRTDPEVEKKALEAGANAYIPKPFDLEELMEVAEKLLN
609	MKSILLVDDSEELRERISAALKSKGYTVIFAPDGVAALEKLKKSLPDLIILDLRMPKMNGFEVLKILKNDPKLKKIPVIVLSRDTSPEVKKKALEAGANAYVPKPFDLEELMEIVDKLLN
610	MKSVLLVDDSEELREKIAKALESEGYTVTFAPDGVAALEKLEKFLPDLIIVDLRMPPMDGFTLLERLKNDPELRKIPVVVLSRDTSPEVRERCLEGGANAYIPKPFDLKELMEVVKKLLN
611	MKSILLVDDSEELRKRISKALESEGYTVVFARDGIEALEKLKEFLPDLIIVDLKMPPMDGFELLKILKNDPELKNIPVVVLSADKDEEVKEKCLELGANKYVPKPFDLEELMKVVKELLE
612	MKSILVVDDSEELRKKITKALESRGYTTVWAPDGKEALEKLEKFLPDLIIVDLDMPEMDGFTLLKKLKENEELKKIPVIVLSRNTDPEVKEKCLEAGANYYVPKPFDLDELMAIVDKMLN
613	MKSILLVDDSEELRKEISEALESRGYTVIYARDGIEALEKLKKQLPDLIIVDLRMPKMDGFTLLKILKEDEKLKEIPVIVLSRDRSPEVEEKCLEAGADKYVPKPFDLEELMEVVEELLN
614	MKSILVVDDSEELRKEITKALESRGYTVTWAPDGKEALEKLKKFTPDLIIVDLRMPEMNGLELLKILKEDEKLKNIPVIVLSSNTNPEVEKEALEAGANAYVPKPFDLEELMKIIEKLLN
615	MKKILLVDDSEELREKIKKALESEGYEVVLARDGIEALEKLKEFLPDLIIVDLRMPPMDGFELLKILKEDPELKKIPVIVLSGDTSPEVRERALELGANAYVPKPFDLEELMEIVKKLLN
616	MKSILLVDDSEELRKIISEALKSRGYSVIYAPNGIEALEKLKKFLPDLIIVDLKMPPMDGFTLLEILKNDEKLKKIPVIVLSRDKSPEVEEKALKAGANAYVPKPFDLDELMEIVDKLLN
617	MKSVLLVDDSEELRERISKALESEGYTVVFAKDGIEALEKLKEFLPDLIILDLRMPPMDGFELLKILKNDEKLKKIPVIVLSANTDPEVKEKALKLGADAYIPKPFDLEELMEVARKMLN
618	MKSVLVVDDSEELREKITKALESEGYTTVWAPNGVEALKKLEKFRPDLIIVDLRMPPMDGFTLLEILKNDEELREIPVVVLSADTSPEVEKRALEAGADAYVPKPFDLEELMEIVKKLLE
619	MKSVLLVDDSEEEREKIKAALESEGYTVVFAPNGIEALEKLKEFLPDLIIVDLRMPPMNGLELLKILKEDEKLKKIPVIVVSRNTDPKVKEECLKAGANAYIPKPYDLEELMEVAKKLLN
620	MKSILLVDDSEELQARIAAALESRGYTVTLAPDGVAALEKLKEFLPDLIIVDLEMPPMDGLTLLKTLKEDEKLKNIPVIVLSRDTSPEVEKECLEAGADAYVPKPFDLEELMAIVEELLE
621	MKSVLVVDDSEELREKITAALESRGYTVTLAPDGVAALEKLEKFLPDLIILDLDMPPMNGFELLKKLKEDEKLKKIPVIVLSADTDPEVKERALKGGADAYVPKPFDLEELMAIAEELLN
622	MKSILVVDDSEELREKITKALESEGYTVTWAPDGIEALEKLKEFLPDLIICDLDMPPMNGYELLKILKENEKLKKIPVIVISRNRDPEEEKRALELGANKYIPKPFDLEELIEVVKKLLN
623	MKSVLLVDDSDELQEEITAALEAEGLTVIRARNGKEALEKLEKELPDLIIVDLRMPEMDGFELLKKLKEDEELKKIPVIVLSRDTSPEVKERCLKAGANAYIPKPFDLEELMAVAKKLLN
624	MKSVLLVDDSEELRERISAALRSEGLTVTWAPDGVAALRALEEFLPDLIIVDLEMPEMDGFELLRRLAADPELRRVPVLVLSADTDPEVRERCLAAGADAYVPKPFDLEELMARVRELLN
625	MKSVLLVDDSEELQEEIAAALEARGYTVVRARDGIEALEKLKEFLPDLIIVDLRMPPMDGFELLRILKEDEKLKKVPVVVLSRDTDPEVKERALKAGANAYIPKPFDLDELMAVVEELLN
626	MKKVLVVDDSEELQKRITEALKSRGYEVVLARNGIEALEKLEKFLPDLIIVDLRMPPMDGFELLKILKEDEKLKKIPVVVLSADTSPEVKKRCLEAGANAYIPKPFDLEELMEVVEKLLN
627	MKSILLVDDSEELREKISKALESRGYSVVFAPDGVEALEKLKEFLPDLIILDLEMPKMDGLEVLRILKNDEELREIPVIVLSGRSDPEVEKEALEAGADKYIPKPFDLDELMEVVEELLN
628	MKTVLLVDDSEELRKEISEALESKGYKVIYAPDGIEALKKLKEFTPDLIIVDLRMPEMDGFELLKILKNDEKLKEIPVVVLSRDTSPEVEKECLELGADAYVPKPFDLEELIEIIEKLLN
629	MKSILVVDDSEELRKKITKALESEGYTVVWAPDGVEALEKLKKFLPDLIIVDLRMPKMDGFEFLRVLANDPELRKIPVVVISRNTDPEVEEEALRLGANAYIPKPFDLEELMEVVKKLLN
630	MKSVLLVDDSEELREKISAALESEGLTVVFAPDGVEALRKLEEFLPDLIIVDLRMPPMDGLELLRRLKEDPELRKVPVVVLSADTSPEVERRALEAGADRYVPKPFDLEELMAVVRELLN
631	MKTVLLVDDSEELRKRISKALESEGLKVIFARDGIEALEKLKEFLPDLIIVDLRMPPMDGFELLKILKEDEKLREIPVIVLSRDSDPEVEKRCLEAGADKYVVKPFDLEELMEVVKELLE
632	MKSILLVDDSEELRKKISEALESKGYTVTYAPDGIEALEKLKEFLPDLIILDLRMPPMDGFTVLKILKEDEKLKEIPVIVLSRDTDPKVKEEALEAGADAYIPKPFDLDELIEVVEKLLN
633	MKTVLLVDDSEEEREEISKALESRGYKVVFAPDGVEALEKLKEFLPDLIIVDLEMPKMNGFELLKILKNDEKLKNIPVIVLSRDTSPEVEKKCLEGGADKYIPKPYDLDELMEVAEELLN
634	MKSVLLVDDSEELRKEISKALESEGLKVVWAPNGVAALEKLKEFLPDLIIVDLRMPPMDGFELLKILKNDEKLKNIPVVVISRDKDPEVRKKALELGADAYVPKPFDLEELMEVVKKLLN
635	MKSVLLVDDSEELRRRIAEALEAEGYTVTLAPDGVAALEKLKEQTPDLIIVDLRMPPMDGFELLKTLKEDEKLKNVPVLVLSADTSPEVEKECLEAGADAYVPKPFDLDELMAVVRELLE
636	MKSVLLIDDSEELREKIAKALESRGYTVIFAPDGKEALEKLKEFTPDLIILDLKMPEMDGFEVLKILKEDEKLKNIPVIVLSGDTSPEVEKKCLEAGADAYIPKPFDLEELMAVVEKMLN
637	MKSILLVDDSEELRKEIKEALESEGYSVVEAPDGVAALEKLKKFTPDLIIVDLRMPVMDGLELLRRLAEDPELRKVPVIVLSADTSPEVRERCLAAGADAYVPKPFDLEELMEIVRKLLE
638	MKSVLLVDDSEELQERITRALESEGLTVVRAPDGIAALEKLEEFLPDLIIVDLDMPPMDGFTLLRILKEDEKLREVPVIVISRDTSPEVEQRALEAGADAYVPKPFDLAELMEIVRRLLE
639	MKSVLLVDDSEELRKRITAALESRGYTVVLARNGIEALKKLKEFLPDLIIVDLRMPPMNGFELLKILKNDEKLKDIPVIVLSRDTSPEVRKECLEAGADKYVPKPFDLDELMAVAEELLN
640	MKKILLVDDSEELREKIAKALESRGYSVVLARNGKEALEKLKEFLPDLIIVDLEMPEMDGFTLLEILKNDPELRKVPVVVLSRDRSPEVEERALAAGADAYVPKPFDLEELMEIVEKLLN
641	MKKVLLVDDSEELRKKISEALESKGYSVVWAKDGIEALKKLEKFLPDLIIVDLDMPKMNGFELLKILKENEKLKKIPVIVISKNTDPEVKEKCLKLGANKYIPKPFDLEELMKVAEELLN
642	MKSVLVVDDSEELRKRITAALESEGYTVTLARNGIEALEKLKKSKPDLIIVDLEMPPMDGFTLLKILKEDEELKNIPVIVLSRDTSPEVKERCLEAGADYYVPKPFDLDELMEVVKELLE
643	MKTILLVDDSEELRKEIAEALESKGYKVIFAPDGVEALKKLEKFLPDLIIVDLRMPPMDGFELLKILKNDEKLKKIPVIVLSADTDPEVKKRCLEAGANAYIPKPFDLEELMEVVEKMLN
644	MKSILLVDDSEELQERISKALESEGYTVTRAPNGKEALEKLEKFLPDLIIVDLRMPPMNGFELLKILKENEKLKEIPVVVISGNKDEKVKEEALKAGANYYIPKPFDLEELMKVIRELLN
645	MKSVLLVDDSEELRKRISEALESRGYTVVLAPNGIAALEKLKEFTPDLIICDLRMPPMNGFELLKILKNDPKLKKVPVIVISRDTSPEVKKRALEAGADYYIPKPFDLEELMEVAEKLLN
646	KKSVLLVDDSEEEREKITEALKSKGYTVVEAKNGIEALEKLKKFLPDLIILDLDMPPMNGFEVLKILKNDEKLKNIPVIVLSGNTDPEIEKKCLEAGANAYIPKPYDLDELIEVAEKLLN
647	MKSVLLVDDSEELRERITKALESRGYSVVTAPDGISALEKLKKFLPDLIILDLDMPPMNGFEVLKILKNDEKLKEIPVIVLSRDTSPEVKEKCLEGGANKYVPKPFDLEELMKVAEELLN
648	MKSILLVDDSEELRKKISKALESKGYKVILARNGIEALEKLKEFLPDLIIVDLDMPEMDGFELLKILKEDEKLKNIPVIVISGDESEEVKKRCLELGANKYIPKPFDLEELMKEVEKLLN
649	MKSILLVDDSEELRELISKALESEGYKVIWAPNGIEALEKLKEFTPDLIILDLRMPPMDGFTLLKILKEDEKLKKIPVVVLSADTDPEVKKECLEAGADAYIPKPFDLEELMEVVKKLLN
650	MKKVLLVDDSEELRKRISEALRSRGYEVIFAPDGVAALEKLEKELPDLIILDLRMPPMDGLEVLRILKEDEKLRKVPVIVLSADTSPEVRQRALEAGADAYIPKPFDLEELMEVAEKLLN
651	MKSVLVVDDSEELRERIAAALRSRGYTVTWAPDGIEALEKLKEFTPDLIIVDLRMPKMNGFELLKILKNNPVLKNIPVIVISRDTSPEVEEECLKLGANAYVPKPFDLEELMAIVEKLLN
652	MKSVLVVDDSEELRERITKALESRGYTVILAPDGIEALKKLEKSLPDLIIVDLRMPPMNGFELLKILKENEKLKKIPVIVLSGDTDPEVKERCLEAGADKYVPKPFDLEELMEIAEELLN
653	MKSVLVVDDSEELRERITAALRAEGLTVVLAPDGVAALEALRERLPDLILLDLDMPPMDGLALLRELAADPALRGVPVVVLSRDTDPAVRERALAAGAAAYVPKPFDLEELLAVVRELLE
654	MKTILLVDDSEELRKKITEALESRGYKVIWAPDGIEALEKLKKQLPDLIIVDLDMPKMNGFELLEILKNNPELKKIPVVVISRDTSEEVKEKCLKAGANAYVPKPFDLEELMEVVEKLLN
655	MKRVLLVDDSEELRKLISEALESRGYTVVWAPDGVAALRALEEFLPDLIIVDLRMPPLDGRALLARLAADPELRGVPVVVLSANADPAVAEEALALGADRYVPKPFDLEELMAVVEELLN
656	MKTVLVVDDSEELREKISKALKSRGYSVIWAPNGIEALKKLEEFLPDLIIVDLDMPPMNGFELLKILKENEKLKNIPVIVLSKRTDPKVKEEALKAGANKYVPKPFDLEELMKIADKLLN
657	MKSVLLVDDSEELAEEIAAALRARGYTVTRAPDGVAALEALRASRPDLIIVDLRMPPMDGFELLRRLAEDPELRGIPVIVLSRDTSPEVRERCLAAGADAYVPKPFDLEELMAIAERLLN
658	MKKVLLVDDSEELRKKIKEALESEGYKVIEARDGIEALKKLKEFTPDLIIVDLRMPKMDGFELLKILKNDEKLKNIPVIVLSGDKDPEVEKKALELGANAYIPKPFDLEELMKVVKKLLN
659	MKSVLLVDDSEALAAEITAALEARGYTVTLAPDGVAALEKLEEFLPDLIIVDLRMPPMDGFELLRRLAEDEELRKVPVVVLSADTSPEVERRALELGADAYVPKPFDLEELLAIVEELLS
660	MKTVLLVDDSEELQEKITKALESEGLKVIRAPDGVAALEKLKEFLPDLIIVDLDMPPMNGFELLKKLKEDEKLKKIPVIVLSGDTSPEVEKKALELGADKYVPKPFDLEELMEIVKELLE
661	MKSVLLVDDSEELRKEISKALESEGYSVVFARDGIEALKKLEEFLPDLIIVDLEMPPMDGFTLLEILKNNPELRKIPVIVLSRDSSPEVEKRCLEAGADAYVPKPFDLEELMKIVKELLN
662	MKKILLVDDSEELRRKIAEALESEGYEVVFAPDGIEALEKLKEFIPDLIILDLRMPKMNGYEVLKILKNNEELKKIPVVVLSADTSPEAKERALKLGANKYVPKPFDLEELMEIVKELLN
663	MKSVLVVDDSEELRKKITEALESEGYSVTLARNGVEALEKLKEFLPDLIIVDLRMPPMDGFELLRILKNDPELREVPVVVLSADTDPEVEERCLEAGADAYVPKPFDLEELMAICRELLN
664	MKTVLLVDDSEELRKKISKALESRGYKVVLAEDGVEALKKLKEFLPDLIIVDLRMPEMDGFELLKILKNDPKLKEIPVIVISRNTSEEVKERALKLGANAYIPKPFDLEELMKVIEELLN
665	MKKILLVDDSEELAEKIKKALESEGYEVVLAPDGKAALEKLKKFLPDLIILDLRMPPMDGFTLLEILKNDEERKNIPVIVLSRDTSPEVEKRCLELGANKYIPKPFDLEELMEVVKELLE
666	MKSVLVVDDSEELRKEITAALESEGWTVVWAPDGEAALAALEERLPDLIIVDLRMPPLDGLELLRRLAADPRLREVPVIVLSADSDPEVRERCLAAGARAYVPKPFDLEELMRIARELLE
667	MKTVLLVDDSEELREEIAKALESRGYKVIFAPDGVAALEKLEKFLPDLIIVDLRMPPMDGFELLRRLAEDEELRKIPVIVLSADTDPEVRERALKAGADAYVPKPFDLDELMEVVEKLLN
668	MKTVLLVDDSEELREKISKALESRGYKVIWAKDGVEALEKLKEFLPDLIILDLRMPPMNGFEVLKILKNDEKLKNIPVIVLSGDTDPEVEKKCLEAGANYYVPKPFDLEELMEIVEKLLN
669	MKSVLLVDDSEELRERITKALEAEGYTVVRARNGIEALEKLKEFLPDLIIVDLRMPPMNGFELLKILKNDEKLKKIPVIVLSADSSPEVEKKALELGANKYVPKPFDLEELMKIAREMLN
670	MKSVLLVDDSEELREKISKALKSEGLTVTWAPDGIEALEKLKKFTPDLIIVDLRMPPMDGFTLLEILKNDEELKKIPVIVLSANTDPEVEERALKGGANAYIPKPFDLEELMKVVKKLLN
671	MKSILLVDDSEELRKKISEALEKEGYKVIFARNGIEALKKLEEFLPDLIILDLRMPPMNGFELLKILKNNEKLKKIPVIVISGDTDPEVKEKALKAGANAYIPKPFDLEELMKVVKEMLE
672	MKSVLLVDDSEELAERIRAALEARGWTVTLARNGIEALEKLKEFKPDLIILDLDMPPMDGFTLLEILKNDEELKNIPVIVLSRDTSPEVRKRCLEAGANAYVPKPFDLDELVAIAERMLN
673	MKSILVVDDSEELREKITKALESEGYTVTWAPDGIAALEKLEEFLPDLIIVDLDMPKMNGFELLKILKNDEKLKNIPVIVISRDTSEEVRKEALELGANAYVPKPFDLEELIEVVKKLLE
674	MKSVLLVDDSEELRRKISEALESEGYTVVFARDGIEALEKLKKFLPDLIIVDLDMPPMDGLTLLEILKNDPELKKIPVVVLSKDTSPEVEKRALEAGADAYIPKPFDLEELMEVVRKLLE
675	MKSILLVDDSEELREEISKALKSEGYSVVFAPDGVSALEKLKKFLPDLIIVDLDMPPMNGFELLKILKNNEELKKIPVVVLSKNTDPEVRERALEAGADAYVPKPYDLEELMEVVKKLLE
676	MKSVLLVDDSEELQKLISEALKSEGYTVVFAPDGISALEKLKKFTPDLIIVDLRMPPMDGFELLKILKNDEKLKNIPVVVLSSDTSPEVEKKCLEGGADKYVPKPFDLDELMEIVKELLN
677	MKSVLLVDDSEEERRRISAALESRGYTVVFARDGLEALAKLEEFLPDLIIVDLRMPPMDGLALLRRLAEDPELREIPVVVVSADRTPEERERALAAGADAYVPKPFDLEELMAVVDELLN
678	MKSVLVVDDSEELRERITAALEARGYTTVWAPNGIEALEKLKEFTPDLIIVDLEMPPMDGFELLKILKNDEKLKNIPVIVLSRRTDPEVKERALKLGADKYVPKPFDLDELMAVAEELLN
679	MKTVLLVDDSEELRKEIAAALEARGYKVVFAPDGVEALEKLKEFLPDLIIVDLRMPPMDGLELLKILKEDEELKKIPVVVLSANKDPEIRRLCLELGASAYVPKPFDLDELMAVIEKLLN
680	MKSILVVDDSEELREKITKALESEGYTVTLARNGKEALEKLKKFKPDLIILDLEMPPMDGFEVLKILKEDEELKEIPVIVLSRNTDPKVREEALELGADAYVPKPFDLEELMEIVKKLLE
681	MKTVLVVDDSEELREKITAALESRGYKVVLARDGVEALEKLREFRPDLIIVDLRMPPMDGLELLRILASDPELREIPVLVLSADTDPEVEERCLEAGASAYVPKPFDLEELMAVVEKLLN
682	MKSVLVVDDSEELRKKITKALESEGYTTIWAPNGIEALEKLEKFLPDLIILDLRMPPMDGFTVLKILKENEKLKNIPVIVISRDTSEEVKKKALELGANAYIPKPFDLEELMKTVKKLLN
683	MKKILLVDDSEELQEKISKALESKGYKVIRARDGIEALEKLEEFLPDLIIVDLKMPKMDGLELLKKLKNDEKLKKIPVIVLSSDTDPEIKEKCLKAGADYYVPKPFDLEELMKVVEKLLN
684	MKTVLLVDDSEELRKKITKALESEGYKVIYAPNGIEALEKLKEFLPDLIIVDLRMPPMDGYELLKILKNDEKLKEIPVIVLSANTDPEEKKRALELGADKYVPKPFDLEELIKVAKELLN
685	MKSVLLVDDSEALRKEIAAALEAEGYTVVEAPDGVAALEKLEEQLPDLIIVDLEMPPMDGLELLRRLREDPALREVPVVVLSADTSPEVRERALAAGADAYVPKPFDLEELMAVVRELLN
686	MKSVLVVDDSEELRKKITEALESEGYTVVWAEDGVEALKKLKEFLPDLIIVDLRMPKMDGFELLKILKNDEELKKIPVIVLSADTSPEVKKRALEAGADYYVPKPFDLEELMKVVKELLN
687	MKSVLLVDDSEELAARIRAALESRGYTVTLAPDGVAALEKLEESLPDLIILDLEMPPMDGLELLRKLAEDEPLRKVPVVVLSRDTDPAVEERCLAAGADAYVPKPFDLDELMAVVEKLLS
688	MKSVLVVDDSEELREEITKALESRGYKVVWAPDGEEALKKLEKFLPDLIIVDLRMPKMNGFELLEILKNDEKLKDIPVIVLSRDTSPEVRKKCLEAGANAYVPKPFDLEELMAIAEELLN
689	MKSVLVVDDSEKLRKEITEALKSKGYTVVWAPNGIEALEKLKEFLPDLIIVDLRMPPMDGLELLKVLKNDPELRKIPVVVLSADTDPEVEKECLEAGANAYVPKPFDLEELIEIVEKLLN
690	MKRVLLVDDSEELREEIARALEAEGLSVVRAPNGEEALKKLEEFLPDLIILDLDMPPMDGLELLKKLKEDEELKKIPVVVLSADTSPEVRERCLEAGADAYIPKPFDLEELVAVIRELLE
691	MKKVLLVDDSEEERKIISEALESRGYTVIFAPDGVAALEKLKKELPDLIIVDLRMPKMDGFTLLKILKEDEKLKNIPVVVLSRDTSPEVKERALKLGANKYVPKPFDLDELMEVVEKLLN
692	MKSVLLVDDSEELRERISAALEARGYTVVWAENGIEALKKLEEFTPDLIILDLEMPPMNGFEVLKILKENEKLKKIPVIVLSRDTSPEVEKEALEAGADAYVPKPFDLDELMAIAEKLLN
693	MKKILLVDDSEELREKIKKALESEGYEVVFARDGKEALEKLKEFLPDLIIVDLRMPEMDGFELLKILKNDPELRKIPVVVISRDTDPEVRKRALEAGADAYVPKPFDLEELIKIIKKLLN
694	MKSVLVVDDSEEERKKITEALESEGYTVVLAPDGIEALEKLKEFLPDLIILDLEMPKMNGFELLKILKNDEELKNIPVIVISKNKDPEVEKKALELGANKYIPKPFDLEELIKVVKELLN
695	MKSVLLVDDSEELRARIAAALESRGYTVVFAPDGRAALEKLKEFLPDLIIVDLRMPEMDGWELLETLANDPELRKIPVVVLSADTDPEARERALAAGADAYVPKPFDLDELIAIVEELLE
696	MKSVLLVDDSEELRARITAALESRGYTVVTAPDGVAALEALRERLPDLIIVDLDMPPMDGWELLRTLAEDPELRGVPVVVLSADSTPEVRRRALEAGADAYVPKPFDLEELMAVVERLLN
697	MKTVLLVDDSEELRERIAAALESRGYKVVWARDGIEALKKLEKQLPDLIIVDLRMPPMDGFELLKKLKENEELKKVPVVVLSADTSPEVRERCLEAGADAYVPKPFDLEELLAVVERLLN
698	MKSVLLVDDSEELRKKIAEALESEGYTVVFAPDGIEALEKLEKFLPDLIIVDLNMPKMNGFELLKKLKEDPKLKKIPVVVLSKDKSPEVEKKCLEAGANAYVPKPFDLEELMEIVKKLLE
699	MKTVLVVDDSEELREKITKALESEGLSVILARNGVEALEKLEKQLPDLIIVDLRMPPMNGFELLRRLKENPELKKIPVVVLSGDSSPEVKKRALEAGADAYVPKPFDLDELMEVVKKLLE
700	MKKVLLVDDSEEEREKISKALRSRGYEVVLARNGVEALEKLKEFLPDLIIVDLEMPPMNGFELLKILKNDPKLKEIPVIVLSKRTDPEVEKEALEAGADAYIPKPYDLDELMEVADKLLN
701	MKSVLLVDDSEALREEITAALRARGYSVVWAPDGVEALRKLEEFRPDLIIVDLEMPPMDGFELLRRLREDPELREVPVLVLSSRTDPEVRRRCLEAGADAYVPKPFDLEELMAIAEELLE
702	MKSILLVDDSEELRKKIKAALESEGYKVIFAPDGIEALEKLKKQLPDLIIVDLRMPPMDGFELLKILKNNEELKKIPVIVISRDTSPEVEKKCLELGANAYVPKPFDLNELIEIIKKLLN
703	MKSVLLVDDSEELRKKIKEALESRGYTVVLAPDGKAALEKLKEFLPDLIIVDLRMPEMDGFTFLEELKNDEERKKIPVIVLSRDTDPEVRKRCLELGADKYVPKPFDLEELMEIAEELLN
704	MKSVLLVDDSEEERERITAALESRGWTVVEAPDGVAALEKLKEFTPDLIIVDLRMPKMDGLTLLKILKNDEELKNVPVIVLSGDTSPEVREKCLEAGANKYVPKPYDLEELVAVAEELLN
705	MKSVLLVDDSEELRKKISEALKSRGYTVVFAPDGIAALEKLKKFLPDLIIVDLDMPPMNGLELLKTLKEDEKLKKIPVIVLSGDTSPEVKKECLEAGADAYVPKPFDLEELMAIAEEKLN
706	MKTILVVDDSEELREKITKALESEGYKVIYAPDGIEALKKLEKFLPDLIIVDLKMPPMDGFELLKILKENEELKNIPVIVLSADTSPEVEKKALEAGANAYVPKPFDLKELMEIVKKLLN
707	MKKILVVDDSEELREKITKALESEGYKVIWAPNGKEALEKLKEFKPDLIIVDLRMPDMDGFTLLKILKEDEELKNIPVIVLSGDSSPEVKERCLKGGANAYIPKPFDLEELMEVVKKLLN
708	MKTILLVDDSEELRKKIAEAIEKRGYKVVFAPNGIEALEKLEKFLPDLIIVDLKMPPMNGFELLKKLKNDPKLKKIPVIVISGNTDPEVEKKCLEAGANKYVPKPFDLEELMKEIEKLLN
709	MKSVLVVDDSEELRERITEALKSKGYTVIWAKNGIEALKKLEEFLPDLIIVDLRMPPMDGFTLLKILKNNEKLKNIPVIVLSSDKSPEVEKKCLEGGANAYVPKPFDLEELMEIVEKLLN
710	MKTILLVDDSEELREKISKALESRGYKVIFAPDGIEALEKLKEFLPDLIIVDLRMPPMNGFELLEILKNDEELKNIPVVVLSADRDPEVEERALEAGANAYVPKPFDLEELMAVIEELLN
711	MKSILVVDDSEELRKLITEALESEGYTVTWAPDGLAALEKLEEFLPDLIILDLEMPPMDGFEVLRVLKEDPELRKVPVIVLSRNTTPEVRERCLEAGADAYVPKPFDLDELMEIVKKLLN
712	MKTILLVDDSEELRKEIAKALESKGYKVIYAKNGIEALEKLKKFTPDLIIVDLDMPPMNGFELLKILKNDPKLKEIPVIVLSADTSPEVEKECLEAGADKYIPKPFDLEELIKVIEELLN
713	MKSVLLVDDSEELREEISAALRAEGYTVTWARDGIEALKKLEKFLPDLIIVDLRMPPMDGYELLRRLAEDPERRKIPVVVLSADTDPEVRQRALELGANAYVPKPFDLEELMAIVRRLLN
714	MKTVLLVDDSEELREKIKKALESRGYKVIYAPDGVEALEKLKEFLPDLIICDLEMPPMDGLELLKILKEDEKLKNIPVIVLSRNTDPEMEKKCLEAGANAYVPKPFDLEELMKIVEKLLN
715	MKSILLVDDSEELRKRIKEALESRGYSVTEAPDGIAALEKLKKQLPDLIIVDLRMPPMNGFELLKILKENEELKKIPVVVLSRDTTPEVKEEALKLGANAYVPKPFDLEELMEIVERLLN
716	MKSVLVVDDSEELREKISKAIESRGYTVVWARNGVEALEKLKEFLPDLIILDLRMPPMDGFTLLKKLAEDEELRKIPVVVLSRDTSPEVEERALRAGANAYIPKPFDLEELMRVIEKLLN
717	MKSILLVDDSEELRERITAALRARGYTVTLAPDGIEALKKLEEFLPDLIIVDLDMPPMNGFELLKKLKNDEKLKNIPVVVLSADSSPEVRKRCLEAGANAYVPKPFDLEELMAVVEKLLN
718	MKTVLLVDDSEELREEIARALESEGLSVIFAPDGVEALEKLKEFLPDLIIVDLDMPPMDGFTLLKILKEDEELKKIPVIVLSRDTSPEVKKRCLELGADKYVPKPYDLEELMRIARELLE
719	MKSVLVVDDSEELRERITAALEAEGYTVVWAPDGVEALEKLKEFLPDLIIVDLRMPPMNGLELLKILKENEELKNIPVVVLSADTSPEVEKKCLEAGANKYVPKPFDLEELMAVVRELLE
720	MKSVLVVDDSEELRERIIKALESRGYTCIFAPDGIEALEKLKEFLPDLIILDLRMPPMDGYEVLKILKNDEKLKKIPVIVLSGDTSPEVEEKALKLGANYYVPKPFDLEELMEVVEKLLS
721	MKSILLVDDSEELQKRITAALEAEGYTVVRAPDGIAALKELEKRLPDLIIVDLRMPPMDGLELLKRLKEDPELREVPVVVLSADTDPEVERRCLEAGADRYVPKPFDLEELMAVVKELLE
722	MKSVLLVDDSEELAARIAAALRARGYTVVLAPDGVAALEKLKEFLPDLIIVDLRMPPMDGFELLKRLKNDPELKKIPVVVLSRDTSPEVEKECLEAGADAYVPKPFDLDELMAVVERLLS
723	MKSVLLVDDSEELRKEIAAALEAEGYTVVFAPDGVEALKKLEEFLPDLIIVDLDMPPMDGFELLKILKNDEKLRKVPVLVLSANTDPEVEKRALEAGADAYVPKPFDLAELMAIVKELLE
724	MKTVLLVDDSEELREEITKALESEGLKVVRARDGVEALEKLKKFLPDLIILDLEMPKMDGFTVLEILKNDEELKKIPVIVLSRDTSPEVKERCLKAGADYYVPKPFDLEELMEVVKKLLN
725	MKTILLVDDSEELREEIKKALESEGYKVIFAPDGVEALRKLEEFLPDLIIVDLRMPPMDGFELLRRLRNDPKLREIPVVVLSADTSPEVRERALELGADAYIPKPFDLEELIEVIKELLE
726	MKSILVVDDSEELREKITAALKSRGYTVIYAPDGIEALEKLKKSLPDLIICDLDMPKMNGFELLKILKNNPKLKEIPVLVISSNTDPEVKEKCLELGADKYVPKPFDLDELIAVIEELLN
727	MKSVLLVDDSEELRKKISEALESEGLTVTYAPNGIEALKKLEKFLPDLIIVDLDMPPMNGFELLKILKNDEKLKNIPVIVLSSNTDPEVEKEALELGANKYIPKPFDLDELMEVVKELLN
728	MKTVLLVDDSEELRKEITAALESRGYKVVTAPNGIEALKKLEKFLPDLIILDLRMPPMNGYEVLKILKNNPKLKKIPVIVLSADTTPEVEEKALELGADAYVPKPFDLDELMAVVEKMLN
729	MKSVLLVDDSEELRKRIAAALESRGYTVTWARNGIEALEKLKEFTPDLIIVDLRMPPMDGFELLKILKNDPKLKEIPVVVLSRRRDPEVEKEALEAGANAYVPKPFDLDELMAVVEKLLN
730	MKTVLLVDDSEELRKEISKALESEGYKVVFAKNGKEALEKLKEFLPDLIIVDLRMKPMNGLELLKILKNDEKLKKIPVIVVSANKDPEIKKRCLEAGANYYVEKPFDLKELMEIVKKLLE
731	MKSVLLVDDSEELREEIAAALESEGYTVVFAPDGEAALAALEERLPDLIIVDLDMPPMDGFELLRRLAEDPELAKVPVLVLSRDTSPEVRERALAAGADRYVPKPFDLEELMAVVRELLN
732	MKSVLLVDDSEELRREIREALESRGLTVVEAPDGVEALKKLEEFLPDLIIVDLDMPPMDGFTLLKILKENEELKKIPVVVLSRNTDPEVEKEALELGANAYIPKPFDLEELMEVVEKLLN
733	MKSVLLVDDSEELRKKISAALESEGYTVTYAPNGIAALEKLKKSLPDLIIVDLDMPPMNGFELLKILKNDPELRKIPVIVLSANTDPEVEKKALEAGADAYVPKPFDLDELMAIAKKLLE
734	MKSVLVVDDSEELRKKITEALKSKGYSVVLARDGIEALEKLKKFLPDLIIVDLRMPKMNGFELLKILKNNPELKNIPVIVLSRDTDPEVKEKCLELGADKYIPKPFDLEELMEVADKLLN
735	MKTVLLVDDSEELREEISKALKSEGYKVIFARDGIEALEKLKEFLPDLIILDLEMPKMNGFEVLKILKNDPKLKKIPVIVLSGNKDPEVEKKALEAGANKYIPKPFDLEELMKVAKELLN
736	MKSVLVVDDSEELRKRITAALESKGYTVIEAPNGVEALEKLKKQLPDLIIVDLDMPPMNGFELLKILKEDEELKNIPVIVLSADTSPEVKERALELGADKYIPKPFDLDELMEVADELLN
737	MKSVLLVDDSEEERRRIAAALESRGYTVVLARDGIEALEKLEKFRPDLIIVDLRMPKMNGFELLRKLKNDPELKEIPVVVLSADTSPEVRERALEAGADAYVPKPFDLEELMAVVERLLS
738	MKSVLLVDDSEELREEIEAALRSRGYTVIRAPDGVSALEKLKEFTPDLIIVDLRMPPMNGFELLKKLKEDEKLKEIPVIVLSGNTDPEVEKEALELGANAYVPKPFDLEELMAIADKLLN
739	MKSVLLVDDSEELRKRIKKALESRGYSVVEARNGKEALEKLKKFLPDLIIVDLRMPPMDGFTLLKILKEDPELRKIPVIVLSRDTDPEVRERALEAGADAYVPKPFDLDELMEIAEKLLN
740	MKSVLLVDDSEELRREISAALESRGYTVVFAPDGKEALEKLEKFLPDLIILDLRMPVMDGFEVLKILKNNEKLKNIPVIVLSADTSPEVEKKCLELGADAYVPKPFDLEELLAIAEELLN
741	MKSILLVDDSEELRERISAALEAEGYTVVFAPNGKEALEKLEKFTPDLIILDLRMPEMDGFTLLKILKNDPKLREIPVVVLSADTSPEVRERALEAGADAYIPKPFDLEELMAVIRELLE
742	MKKVLLVDDSEELRKRIRAALESEGYEVIEAKDGKEALEKLKEFLPDLIIVDLEMPEMDGFELLKILKEDEKLKEIPVIVLSRDTSEEVKKKALELGANKYIPKPFDLEELMAVAKELLN
743	MKSILLVDDSAELREEITAALESRGYTVRLAPDGVAALEKLEEFLPDLIIVDLRMPPMDGFALLRRLAEDPELRKVPVVVLSADTDPEVERRALEAGADAYVPKPFDLEELMAVVEKLLN
744	MKSVLVVDDSEELREEITRALESEGYKVIWARNGIEALEKLKEFLPDLIIVDLRMPPMNGFELLKILKNDEKLKNIPVIVLSRDTSPEVEKEALELGADAYIPKPYDLKELMEVVKKMLN
745	MKSVLLVDDSEEERERISAALESRGYTVVFAPDGIEALEKLEKFLPDLIIVDLRMPKMDGFELLKILKNNEELRKVPVIVLSSDTDPEVEERCLELGADKYVPKPYDLDELMAVAEELLN
746	MKSVLLVDDSEELREKIKKALESRGYSVIFAPDGITALEKLKEFLPDLIILDLRMPPMDGFTLLKILKNDPKLKNIPVIVLSGDTSPEVEKKALEAGANAYIPKPFDLEELMEVVDKLLN
747	MKSVLLVDDSEELRKEIAEALESRGYTVTLAPDGIAALEKLKEFLPDLIILDLRMPPMDGFELLKILKNDEKLKKIPVVVLSADTDPEVEKRCLEAGADAYIPKPFDLDELMEVVEKLLN
748	MKTVLLVDDSEEEREEIAAALRSRGYTVVFAPDGVEALKKLEKQLPDLIIVDLRMPKMDGFELLKILKNDEKLKNIPVVVLSRDSSPEVREKCLELGADKYVPKPFDLEELMAVVEELLN
749	MKSVLLVDDSEELRKRIAEALESRGYTVVWARNGIEALEKLKEFLPDLIIVDLRMPPMDGFTLLKILKNDPKLKNIPVIVLSGDTTPEVKEECLKLGANAYIPKPFDLEELMAVADELLN
750	MKSVLVVDDSEELRKKITEALESRGYKVVLAPDGKEALEKLKEFLPDLIIVDLEMPPMDGFELLRILKNDEKLRKIPVVVLSRRTDPEVRERALELGADAYVPKPFDLEELMEIVEKLLN
751	MKSVLLVDDSEELRKRISEALESEGLTVTYAPDGIEALEKLKEFLPDLIICDLRMPKMNGLELLKILKNDPELKKIPVIVLSSDTSPEVEEECLKAGANAYVPKPFDLEELIKIAKKLLN
752	MKSILVVDDSEELRERITAALESRGYTTVWAPDGVEALEKLKEFLPDLIIVDLRMPKMDGFELLRRLKNDEELKKIPVVVLSSDTSPEVRERALELGANEYVPKPFDLEELMAVVDRLLN
753	MKSVLLVDDSEELRERISEALKSRGYTVTYAPNGIEALEKLKEFLPDLIIVDLDMPPMNGFELLKILKNDEKLKNIPVIVLSRNTDPEVKKKCLELGANAYIPKPFDLEELMKVAEKMLN
754	MKSVLLVDDSEELRRRISAALEAEGYTVVWAPDGIAALEKLKEFLPDLIIVDLEMPPMDGFTLLKILKEDEKLKKIPVVVLSGNTDPEVKERALKAGANAYIPKPFDLEELIEVIKKLLN
755	MKTILLVDDSEELREKISKALKSKGYKVVYARNGIEALEKLKEFLPDLIILDLRMPPMNGFEVLKILKNDPKLKKIPVIVISGNTDPEVEKKALEAGANKYIPKPFDLEELMKVVEKLLN
756	MKRVLLVDDSEELREEIEAALRAEGLTVVRARDGVEALRALEAFRPDLIIVDLDMPPMDGWELLRRLAADPELRGVPVVVLSADTDPAVRERALAAGADRYVPKPFDLEELMAVVRELLE
757	MKSVLLVDDSEELRRRIAAALEAEGYTVTWAPDGIAALEKLKEFTPDLIILDLRMPPMDGFEVLKILKNDEKLKEIPVVVLSRDTSPEVEKKALEAGANAYVPKPFDLEELMAVVRELLE
758	MKSVLLVDDSEEERKLISKALESRGYTVIFAPDGIEALKKLEEFLPDLIILDLKMPPMDGFTLLKILKNNEKLKNIPVIVLSRDRSPEVKEKALEAGANAYVPKPFDLDELMEIAEKLLN
759	MKTVLLVDDSEELRARITAALEARGYTVVTAPNGVAALEKLKEFLPDLIIVDLKMPPMDGFTLLKELKNDEKLKNIPVIVLSRDTSPEVEKKCLELGANKYVPKPFDLEELMAVAEELLN
760	MKSVLLVDDSEELRELISKALESEGYKVIYAPDGIEALEKLKEFLPDLIIVDLRMPKMDGFTLLKILKNDEKLKEIPVIVLSRDTSPEVEEKCLELGANKYVPKPFDLEELIRIAKELLE
761	MKSVLLVDDSEELRRRISAALESRGLTVVWAPNGVEALEKLKEFLPDLIILDLRMPPMDGLEVLKTLKNDPKLRKVPVLVLSADTSPEVRERALEAGADRYVPKPFDLEELMAVVEELLN
762	MKSVLVVDDSEELRERITAALRARGYTVTWAPDGIEALEKLEKFRPDLIIVDLRMPPMDGFELLRVLREDPELREVPVIVLSADTSPEVRERALELGADAYVPKPFDLEELMAVVEELLN
763	MKSVLLVDDSEEEREEISKALKSKGYTVTFAPDGIEALKKLEKFLPDLIIVDLEMPPMNGLELLKKLKENEELKNIPVIVLSKNTDPEIKKKCLELGANYYVPKPYDLEELMKIAEKLLN
764	MKSILLVDDSEELRERIAAALRARGYTVVWAPDGIEALKKLEEFLPDLIILDLRMPPMNGLELLKKLKENEELKKIPVIVLSRNKSPEVEKECLEAGADAYVPKPFDLDELMAVVEKLLN
765	MKRVLLVDDSEELRARIAAALESRGYSVVLAPDGVAALAALEEFLPDLIIVDLRMPPLDGEELLRRLAEDEELRGVPVVVLSADTSPEVRRRALELGADAYIPKPFDLEELMAVVERLLN
766	MKSILLVDDSEELRKKIAEALESRGYTVTLARDGKEALEKLKEFLPDLIIVDLDMPEMDGFELLKTLKENEELKNIPVIVLSADTDPEVEERALEAGADAYIPKPFDLEELMAVVDKMLN
767	MKSILLVDDSEELREKITAALKSEGYTVTLAPDGVAALEKLKEFTPDLIIVDLRMPKMDGFTLLKKLKNDEKLKNIPVVVLSADKSPEVEKEALELGANKYVPKPFDLEELMKIVKELLE
768	MKSVLLVDDSEELRKRISEALESEGYTVVWARDGIEALEKLEEFLPDLIIVDLEMPPMDGFELLKRLKEDEKLKNIPVIVLSRDSSPEVRERCLKLGANKYVVKPFDLEELMEVAKKLLN
769	MKSILLVDDSEELQEEIAKALESKGYTVVRARNGIEALEKLEKFLPDLIIVDLEMPPMDGFELLKRLKNDEELKKIPVIVLSRNKDPEVEKRCLELGANAYVPKPFDLEELMKIVEKLLN
770	MKKILLVDDSEELRKEIAKALESEGYEVVFAPDGIAALEKLKKFLPDLIILDLRMPPMDGLELLKILKNDEKLKEIPVIVLSADTSPEVKELALKAGANAYIPKPFDLDELIEVVKKLLN
771	MKSVLVVDDSEELRKEITEALEKEGYTVVLAPNGIEALKKLEEFTPDLIILDLEMPPMDGFELLKKLKNDPELKNIPVIVLSRDTDPEVKKRALELGANKYVPKPFDLEELMEVAKKMLN
772	MKSILLVDDSEELREKISKALESEGYTVVYARNGIEALEKLKKFLPDLIIVDLRMPPMNGFELLKILKNDKELKKIPVIVLSADTSPEVRKRALEAGADKYVPKPFDLEELMKIVKELLN
773	MKSVLLVDDSEELREKISEALKSRGLSVVYARDGKEALEKLKEFLPDLIIVDLNMPEMNGLELLEILKNDPKLKKIPVVVLSADKSPEVEKKCLEAGANKYIPKPFDLEELMEVVEELLN
774	MKSVLVVDDSEELRERIVEALESRGYTVTLARDGIEALKKLEEFLPDLIIVDLRMPPMDGLELLKKLKENEELKKIPVVVLSRNRDPEVEEEALEAGADAYIPKPFDLDELMAVVEKLLN
775	MKSVLVVDDSEELRKKITEALESEGYTVVWARDGVEALKKLEKFLPDLIIVDLDMPPMNGFEFLKTLKNNEKLKKIPVIVLSGNTDPEVEKRCLELGANAYIPKPFDLEELIEVAKKLLE
776	MKKILLVDDSEEEREEITAALEAEGYSVVLAPNGIEALEKLKEFLPDLIILDLRMPPMNGFEVLKILKNDEELKKIPVIVLSRNTDPEVEKKCLELGADKYIPKPYDLEELMAVVKELLN
777	MKSVLLVDDSEELREKISKALESRGYTVIFARNGIEALKKLEEFLPDLIIVDLRMPPMDGFELLKKLKNDEKLRKIPVIVLSRDTSPEVRERALEAGANAYVPKPFDLEELMEVAEKLLN
778	MKSILLVDDSEELRREIAAALESRGYTVTFAPDGIEALKKLEKELPDLIIVDLDMPPMNGFELLKILKNNPKLKKIPVVVLSADTSPEVEKRCLEAGANAYIPKPFDLEELMAVVEKLLN
779	MKSVLLVDDSEELRERIEAALRSRGYSVVRARDGKEALKKLEEFLPDLIIVDLEMPEMDGLELLKILKENEKLKEIPVVVISRNTSPEIEEKCLKAGANAYIPKPFDLEELMAVVEKLLN
780	MKSVLLVDDSEEEQREIAEALEAEGYTVVRAPSGVEALEKLREFLPDLIIVDLRMPPMDGLELLRRLAEDPELREVPVVVLSADTDPEVRERCLAAGADAYVPKPYDLEELMAVVRKLLE
781	MKSVLVVDDSEKEREEITKAIESKGYKVIWAKDGIEALEKLKEFLPDLIIVDLKMPKMNGLEFLKILKNDEELKKIPVIVLSGNTDPEIKKKCLELGANYYVPKPFDLEELMEIIEKLLN
782	MKSVLLVDDSEELRKKISEALESEGYSVVWAPDGVAALEKLKEFLPDLIIVDLRMPPMDGFELLKILKENEELKKVPVIVLSKNTSPEVKKKALEAGANAYVPKPFDLEELMKIAKKLLE
783	MKSILVVDDSEELRKKISEALESRGYTVIWAENGIEALEKLKKFLPDLIIVDLEMPPMDGLELLRILKEDEKLREIPVVVLSRRTDPEVRERALEAGADAYVPKPFDLDELMEIIEKLLN
784	MKTVLVVDDSEELREKITAALESRGYTVRWAPDGVAALKELEKFLPDLIILDLDMPPMNGLEVLEKLKNDEELKKIPVIVLSRDTSPEVKERALKAGANAYVPKPFDLDELMAIADKLLN
785	MKSVLLVDDSEELRRRIAEALEAEGWTVTLAPDGIAALEALEKFTPDLIIVDLRMPPMNGLELLRRLREDPVLREIPVIVLSRDTSPEVREEALEAGADAYVPKPFDLDELMAVARRLLN
786	MKSVLLVDDSEELRERIAAALEAEGLTVVYAPDGKAALEKLEKFLPDLIICDLDMPEMDGFELLKKLKNDEKLKNIPVVVLSADTSPEVREKALELGANKYVPKPFDLEELMAVVRELLN
787	MKSVLVVDDSEEERERITAALESRGYTVIWAENGIEALKKLEEQLPDLIILDLRMPPMNGFEVLKILKNNPELKNIPVIVISGNKSEEVKEKALKLGANAYVPKPYDLDELMAVCEKLLN
788	MKSVLLVDDSEELRERISKALKSEGLTVVFARNGKEALEKLEKFTPDLIIVDLEMPEMDGFELLKILKNNEKLKNIPVIVISRNKDEEVKKRCLELGANKYIPKPFDLEELMKVVKELLN
789	MKRVLLVDDSEELRKKISEALEAEGYTVVFARDGKEALEKLKEFLPDLIICDLEMPEMNGFELLKILKEDEELKKIPVIVLSGRTDPEVEEECLKLGADAYVPKPFDLEELMAIARELLE
790	MKSVLLVDDSEELREEIAKALESEGYTVIFAPDGIAALKELEKFTPDLIIVDLEMPKMDGLTLLKILKNDEKLKKIPVIVLSGDTSEEVKKKALEAGADAYVPKPFDLDELMKIARELLN
791	MKSVLLVDDSEELRREIAEALEAEGWTVTLAPDGVAALEALAARRPDLIIVDLRMPPLDGLELLRRLAADPALRDIPVIVLSADTSPEVEARCLAAGASAYVPKPFDLEELIAVARELLE
792	MKSVLLVDDSEELRKEISKALESEGLTVTFAKDGVEALEKLKEFLPDLIILDLEMPKMNGFELLKILKEDEKLKKIPVIVLSGRTDPEVKEKCLELGADAYVPKPFDLEELIEIIKKLLN
793	MKSVLVVDDSEELREKITKALESEGWTVTWAPNGIEALEKLKKFTPDLIIVDLNMPPMDGFEFLKILKNDEKLKNIPVIVISADTSPEVEKKCLELGANAYIPKPFDLEELIEVAKKLLN
794	MKSILVVDDSEELRKKITEALESKGYTTVWAPNGIEALKKLEKFLPDLIICDLRMPPMNGFELLKILKENEKLKKIPVVVISSDTSPEVKKKALELGANKYIPKPFDLEELMKVIEELLN
795	MKTILLVDDSEELRKEISKALESRGYKVIWAPDGIAALEKLKEFLPDLIICDLEMPPMNGFEFLKTLKNDEKLKKVPVIVLSSNTDPEVREKCLKLGANKYVPKPFDLEELMKIVEEMLN
796	MKSVLLVDDSEELRERISKALESRGYTVVWAPDGVAALEKLKEFLPDLIIVDLRMPPMDGFELLKRLKNDEKLKEIPVVVLSRDTDPEVRERCLELGANYYVPKPFDLEELMEVIEKLLN
797	MKSVLLVDDSEELREKIKKALESRGYTVVEAPDGEEALRKLEEFLPDLIILDLEMPPMDGFELLRRLAEDPELREVPVLVLSKNTDPEVRRRALEAGADAYVPKPFDLEELMAIVEKLLN
798	MKKVLVVDDSEELRKKITAALEAEGYTVIWAKNGIEALEKLKEFLPDLIIVDLDMPPMNGFELLKKLKNDPKLKKIPVIVLSRNSDPEVKKKALELGADAYIEKPFDLEELMAVARKLLN
799	MKKILLVDDSEELREKISKALESEGYEVIFAKNGKEALEKLKKFLPDLIIIDLRMPEMNGFELLKKLKEDEKLKKIPVVVLSRDTDPEVKEKALELGADKYVPKPFDLEELMKIVKELLN
800	MKKILLVDDSEELQKLITEALKSKGYSVVLAPDGVAALEKLKKFTPDLIIVDLRMPPMNGEELLKILAEDEKLRKVPVVVISADTDPEVEKRALELGANAYVPKPFDLEELIEVVEKLLN
801	MKTILLVDDSEEERKKITEALESEGYKVIWAPDGKEALEKLEKFLPDLIIVDLRMPPMDGFELLKKLAEDPKLKEIPVVVLSRDTSPEVEKRALEAGANAYIPKPYDLKELMEVIKKLLN
802	MKSVLLVDDSEELRKKISEALKSEGLTVTFAKNGKEALEKLKKFLPDLIIVDLRMPDMDGFELLKILKNDPELKKIPVIVLSSDKSPEVEKKCLEAGANAYIPKPFDLEELMKVAKKLLN
803	MKTVLLVDDSEELRERISEALESEGYKVIFAEDGIEALEKLKEFLPDLIILDLRMPKMNGFEVLKILKEDPELRNIPVIVLSRDTDPEVRERALKLGADAYIPKPFDLEELMEVAKKLLE
804	MKTVLVVDDSEEERELISKALESEGYKVIWAKDGIEALEKLKKFTPDLIILDLRMPPMDGLEVLKILKNDEKLKNIPVIVLSRNTDPEVKEECLKAGADKYIPKPFDLEELMKVAKELLN
805	MKSILLVDDSEELRERIAKALESEGYKVIFAPNGIEALKKLEEFTPDLIIVDLDMPEMNGLELLKILKNNEKLKNIPVIVLSRNTDPEIEKKCLEAGADAYIPKPFDLEELMEVVKKMLN
806	MKSILLVDDSEELRKEITAALEAEGYTVTWAPDGIEALEKLKEFKPDLIIVDLRMPPMDGLELLKILKNDEELKNIPVIVLSRDTSPEIEKKALEAGADAYVPKPFDLEELMAIVRELLE
807	MKSVLLVDDSEELRKKISAALESEGLTVTFAPDGVEALKKLEEFLPDLIIVDLEMPPMNGEELLRILKEDEERRKIPVLVLSANTDPEVRERALELGADAYVPKPFDLEELMAIVRKLLN
808	MKSVLVVDDSEELQAEITAALEAEGYTVRRAPDGIAALKELEKFTPDLIIVDLRMPPMDGFELLKKLKEDEELKKIPVIVLSRNTDEEVKKKALEAGANAYVPKPFDLEELMAIARKLLN
809	MKSILLVDDSEELQEEITAALESRGYTVIRAPDGVAALEKLKEFLPDLIILDLRMPPMDGFTLLSILKNDEKLRKIPVVVLSRDTDPEVKQRCLEGGADRYVPKPFDLEELMAVVEELLN
810	MKSILLVDDSEELRKKITKALESEGYTVVYAPNGVEALKKLEKFTPDLIILDLDMPPMNGLEVLKILKENEKLKKIPVIVLSADTSPEVKKKALEAGANYYVPKPFDLEELMKVVKKLLN
811	MKSILLVDDSEELREEIAAALESRGYTVVFAPDGVAALEKLKKFKPDLIIVDLRMPPMDGLTLLRILKEDEELREIPVIVLSADTSPEVERECLEAGADAYVPKPFDLDELMAIAEELLN
812	MKSVLLVDDSEELAARITAALESEGLTVRLAPDGVEALRLLEEFRPDLIIVDLRMPPMDGLELLRVLREDPELREIPVVVLSADASPEVERECLEAGADAYVPKPFDLEELLAVVRELLN
813	MKSVLVVDDSEELREKITAALESEGYTVTLAPNGIEALEKLKEFTPDLIIVDLEMPPMNGFELLKILKNDEKLKKIPVIVISRRTDPEVEEKALKAGANAYIPKPFDLEELMAVAKKLLE
814	MKSVLLVDDSEELQERIAAALEAEGYTVVRARNGVEALKKLEEFLPDLIIVDLRMPPMDGFTLLKILKNDEKLRKIPVVVLSADKSPEVRERALELGADRYVPKPFDLDELMAVVRELLE
815	MKTVLLVDDSEELRAEISAALESRGYTVIHAPDGVAALEALAERLPDLIIVDLEMPPLDGLELLRRLAADPELREVPVLVLSRDTSPEVRERALAAGADAYVPKPFDLEELIAIAEELLE
816	MKSVLVVDDSEELRERITAALEAEGYTVVLAPNGIEALKKLEEFLPDLIIVDLDMPPMNGFELLKILKENEKLKKIPVVVLSRDSSPEVRKKCLEAGADRYVVKPFDLEELMAVVRELLE
817	MKKVLVVDDSEEERERITAALEAEGYSVVWAPDGIAALKKLEEFLPDLIIVDLDMPKMNGLELLKILKNNPKLKNIPVIVLSSDTSEEVKKRCLEAGADAYIPKPYDLEELMAVAKKLLN
818	MKTILLVDDSEELREKITKALESRGYKVVWAKDGIEALEKLKEFLPDLIIVDLRMPKMDGFTLLKILKEDEKLKNIPVIVLSADTSPEVREKALELGANKYVPKPFDLEELMKIVEELLN
819	MKSVLLVDDSEELRKLISEALESRGYSVVLAPDGVAALEKLEEFLPDLIIVDLRMPPLDGLTLLRILAEDPELRKIPVIVLSADTDPEVRERALEAGADAYIPKPFDLDELMEVAEKLLN
820	MKSILLVDDSEELQEEISAALESRGYTVVRARDGVEALKKLEEFLPDLIILDLDMPPMNGFEVLKILANNPELKNIPVVVLSANTDPEVEEECLKLGANAYVPKPFDLEELMEIVEKLLN
821	MKSVLVVDDSEELRERIVAALEAEGWTVTLAPDGIEALRKLKEFTPDLIIVDLDMPPMDGFTLLEILKNDPELKKVPVIVLSRDTDPEVEQRCLEAGANAYVPKPFDLDELLAVARALLE
822	MKKILLVDDSEELRKKISEALESEGYKVIFAPNGIEALKKLEKELPDLIICDLRMPPMNGFELLKILKNNEKLKNIPVIVLSSDTSPEVEKECLELGANKYVPKPFDLEELIKIVKELLE
823	MKSILLVDDSEELREKISKALESRGYKVVWAKDGIEALEKLKEFLPDLIIVDLDMPPMDGFTLLEILKNDEKLKKIPVVVLSSDTDPEVKERCLKLGADKYIPKPFDLEELMKVVEELLN
824	MKSVLLVDDSAELAERISAALEAEGYTVTLAPDGVAALEKLKERTPDLIILDLRMPPMDGLTVLRTLAEDPELRKVPVVVLSADTDPEVEEECLRAGADAYVPKPFDLDELMAIVRELLN
825	MKSVLLVDDSAREREEIAAALRAEGLTVVTAPDGVAALEKLEEQLPDLIIVDLRMPPMDGLELLRRLAEDPELRKVPVVVLSADRDPEVRERCLRLGANAYVPKPYDLAELMAVVRKLLE
826	MKSILLVDDSKELRERISKALESRGYTVVWAENGKEALEKLKEFLPDLIILDLRMPEMNGFEVLKRLKEDPELRKVPVVVLSRDTDPEVRERALEAGADKYVPKPFDLEELMEVVEELLN
827	MKSVLLVDDSEELREEISKALESEGYTVTWARNGIEALKKLEEFLPDLIIVDLEMPPMNGFELLKILKNDEKLKNIPVIVLSSRTDPEVKKKCLELGANAYVPKPFDLDELMAIVKKMLN
828	MKSVLLVDDSEELREKISKALESEGLTVTFAPNGIEALEKLKEFLPDLIILDLEMPPMDGFTLLEILKNDEELKNIPVVVLSRDTSPEVEKKCLEAGADAYIPKPFDLEELMEVVKKLLE
829	MKSVLLVDDSEELQERIEAALRAEGYTVVRAPDGVAALEKLEEFRPDLIIVDLRMPPMDGFELLRVLKEDPELREIPVVVLSADTDPEVERRCLEGGANAYVPKPFDLAELMAVVRELLN
830	MKSVLVVDDSAAERERITAAIKSRGYTVITAPDGIAALKKLEEFTPDLIIVDLRMPPMNGFELLKILKNDEKLKKIPVIVLSANTNPEVKEKALKLGANAYVPKPFDLEELMEIAEKLLN
831	MKKVLLVDDSEELRKKISEALESEGYEVIFAKDGIEALKKLEKFLPDLIIVDLNMPKMNGLELLKILKNNEELKKIPVIVLSSNTDPEIKKKCLEAGANYYVPKPFDLKELIEIAKKLLE
832	KKKVLLVDDSEELRKKISEALKSKGYEVVFAKDGIEALEKLKKFLPDLIIVDLRMPPMDGFELLKTLKNDEKLKNIPVIVLSGDTDPEVEKKALEAGANAYIPKPFDLEELIKEVEKMLN
833	MKTVLLVDDSEELQKKIAEALEKEGLKVVRAPDGVAALEKLEEFLPDLIIVDLDMPEMDGFELLRRLAEDERLRKIPVIVLSRDTSPEVRRRCLEAGADAYVPKPFDLEELMEIVKKLLE
834	MKSVLLVDDSERLREEIERALRSEGYTVVRAPDGKAALEKLKEFLPDLIIVDLRMPEMDGLTLLKELKNDEERKKIPVIVLSANTDPEIEQKCLEAGASKYVPKPFDLEELMEVARELLE
835	MKSILLVDDSEELRERIAKALESEGYKVIFARDGVEALKKLKEFLPDLIIVDLRMPPMDGLTLLRELKNDEKLKEIPVVVLSADTDPEVREEALKAGANAYVPKPFDLDELMEIVKKLLN
836	MKSVLLVDDSEELQDLISKALESRGYTVVRARNGIEALEKLKEFLPDLIIVDLDMPPMNGLELLKILKNDEKLKNIPVIVLSRDSSPEVKKKCLEAGANKYIPKPFDLEELMKVAEELLN
837	MKSVLLVDDSEELRKEISKALESEGYTVVWAPNGVEALEKLEKFLPDLIILDLRMPPMDGWELLRRLAADPELRKIPVIVLSGDTSPEVRRRALEAGADAYIPKPFDLEELMEVVKKLLN
838	MKSILLVDDSEELRKKISEALKSEGYTVIEAPDGKEALEKLKEFLPDLIIVDLEMPEMNGFELLKILKEDEKLKKIPVIVLSKDTSPEVKEKCLKAGADKYIPKPFDLKELMEVVKKLLN
839	MKSVLVVDDSEELREKITAALESRGYTTVWAPDGVAALEKLRERTPDLIIVDLRMPPMDGFELLRRLAEDPELREVPVIVLSADTSPEVKQRALEAGADAYIPKPFDLEELMAVAEELLN
840	MKTVLLVDDSEELQERIAAALEAEGYTVIRARNGVEALEKLEEQLPDLIILDLEMPEMNGFEVLRKLREDEELRKVPVVVLSRDTSPEVEERCLELGADRYVPKPFDLAELMAVVRELLN
841	MKSVLLVDDSEALRERIAAALESEGLSVVLARDGIEALKKLEEFLPDLIILDLEMPPMDGFEVLKILKNNEKLKDIPVIVLSGDTSPEVEKKALEAGADAYIPKPFDLEELLAVARRLLE
842	MKTILLVDDSEELRKKISEALESKGYKVIYARDGIEALKKLEKFLPDLIIVDLSMPPMDGFTLLEILKNNEELKKIPVLVLSADTSPEVEKRCLEAGANAYVPKPFDLEELMKIVEKLLN
843	MKKVLLVDDSEELREEISKALESEGYEVVWAPDGVEALEKLKKFLPDLIIVDLRMPKMDGFTLLEILKNDEELKKIPVVVLSRDTDPEVRKRALELGANAYVPKPFDLEELMEIVKKLLN
844	MKSILLVDDSEELRKKISEALKKEGYTVTFAKDGVEALEKLKEFLPDLIIVDLDMPKMNGFELLKILKNDEKLKEIPVIVLSGDTSPEVEKKCLELGANAYIPKPFDLEELIEVAKKLLN
845	MKSVLLVDDSEELRERISAALRSRGYTVVFAPDGVEALRKLEEFLPDLIIVDLRMPPMDGFELLRRLAEDERLREIPVVVLSADKSPEVERRALEAGANAYIPKPFDLEELMAVVERLLN
846	MKTVLLVDDSEEERDEITAALESRGYKVVRAPNGIEALKKLEEFLPDLIIVDLDMPPMNGFELLKILKNDEKLKNIPVIVLSKRTDPKVKEEALKAGANKYVPKPYDLEELMAIAEELLN
847	MKSILLVDDSEELAKKISEALESEGYKVILARDGIEALEKLKEFRPDLIIVDLRMPPMNGFELLKILKNDEELRKIPVVVLSSDTDPEVERRALEAGADVYVPKPFDLEELIAIVKELLE
848	MKSVLLVDDSEELREEIAEALRSEGLTVTFARNGVEALEKLKEFLPDLIIVDLDMPPMNGFELLKELKNDEKLKKIPVIVLSRNTDPEVKERCLKAGANAYVPKPFDLEELMEIVRKLLE
849	MKSVLLVDDSEELRKRISAAIESKGYTVTWARNGKEALEKLKKFKPDLIIVDLRMPPMNGFELLKILKEDEELKEIPVVVLSADTSPEVEEKCLEAGADAYVPKPFDLEELMAIIDELLN
850	MKKVLLVDDSEELRKKISEALESEGYSVVWAKDGIEALKKLKEFRPDLIILDLRMPKMDGFTLLKILKEDEELKNIPVVVLSSDTSPEVKEKALEAGANYYVPKPFDLEELIKVVKKLLE
851	MKSVLLVDDSEELRERIAAALEAEGYTVVLARDGVEALRKLEEQLPDLIIVDLEMPPMDGFTLLRRLAADPELRKVPVIVLSADTSPEVRERALAAGANRYVPKPFDLEELLAVARELLN
852	MKRVLLVDDSEELRRRIAAALEARGYTVVWAPNGIEALEKLKEFTPDLIIVDLRMPPMDGYTLLKELANDEKLKKVPVIVLSGDTSPEVKKRALELGASAYVPKPFDLDELMAVAEALLS
853	MKSVLLVDDSKELREKIAAALESEGLTVVLAEDGVEALEKLKEFLPDLIIVDLRMPKMNGFELLEKLKNDEELKKIPVIVLSGDTTPEVEEKCLEAGADKYVPKPFDLEELMAVVRELLN
854	MKSVLLVDDSEELRKKIKEALEKEGLTVVEARDGIEALEKLKEFKPDLIILDLRMPPMDGFEVLKKLANDEELKNIPVIVLSADTSPEVEERCLKAGANAYIPKPFDLEELMAVAKELLN
855	MKSVLVVDDSEALREEITAALRARGYTVTLAPDGVAALEKLREFLPDLIILDLRMPPMDGFALLRRLREDPELRDIPVIVLSADTDPEVREEALRAGADAYIPKPFDLEELMAVADELLN
856	MKSILVVDDSEELRKKITEALESEGYKVIWAKNGIEALKKLEKELPDLIIVDLRMPEMDGYELLKILKNDEKLKKIPVIVISRNTDPEEKKKALELGADYYVPKPFDLEELIKVVKKLLN
857	MKTILLVDDSEEEREKISKALESEGYKVIFAPDGKEALEKLEEFTPDLIILDLRMPEMDGFEVLKILKNDEELKKIPVIVVSGDTSPEVKKRCLEAGANKYVPKPYDLEELIEIVKEMLE
858	MKSVLLVDDSEELRKEIKAALESRGWTVIEARNGVEALEKLKKFTPDLIIVDLDMPPMNGFELLKILKNDEKLKEIPVIVLSRDTSPEVRKRCLELGANAYIPKPFDLEELIEVAEELLN
859	MKSVLLVDDSEELRKKISEALESRGYTVTWAENGIEALEKLKKFLPDLIILDLRMPPMDGFTLLKILKEDEKLKKIPVIVLSRDESPEVKKECLELGANKYIPKPFDLEELMEVVEELLN
860	MKTILVVDDSEELREKITKALESEGYKVIWAKNGEEALKKLEEFLPDLIIVDLDMPPMNGFELLKKLKENEELKKIPVIVISGNTDPEVKKKCLELGANKYIPKPFDLEELIKVAKELLE
861	MKSVLLVDDSEELREKIAAALESKGYTVTFAPDGIEALEKLKKFLPDLIIVDLRMPPMDGFTLLEKLKNDEKLKNIPVVVLSADTDPEVKERCLKAGANAYIPKPFDLEELMAVVEKLLN
862	MKSVLLVDDSEELRERIAAALRAEGYSVTLARDGIEALEKLKKFLPDLIILDLRMPPMDGLELLRTLAEDPELREIPVVVLSADRDPEVEREALEAGADAYVPKPFDLDELMAVVRELLS
863	MKSVLVVDDSEALRERITAALRSEGWTVVWAPDGVAALEKLEEFLPDLIIVDLRMPPMDGLELLKKLKNDPKLKKVPVIVLSGDTSPEVEREALEAGANAYVPKPFDLDELMAIAKKLLE
864	MKSVLLVDDSEELRKRISEALESEGLTVIFAPDGIEALEKLKEFLPDLIILDLRMPKMDGLEVLKILKNDPELKNIPVIVLSRDTSPEVKEKCLKAGANAYIPKPFDLEELMKVVRKLLN
865	MKSVLLVDDSEAEREKISKALESEGLTVIWAKDGKEALEKLKKELPDLIIVDLEMPEMNGFELLKILKNDEKLKKIPVVVLSRDTSPEVEKKALEAGADKYIPKPYDLEELMKVVKELLN
866	MKSILVVDDSEELRKKITEALESEGYKVVLAPNGKAALEKLKKFLPDLIIVDLNMPDMDGFTLLKILKNDEKLKKIPVIVLSSNTDPEVEKEALEAGADAYIPKPFDLDELMEVVKKKLN
867	MKSILLVDDSEELREKISEAIKSEGYTVIYAPNGIEALKKLEEFLPDLIIVDLEMPPMNGFELLKKLKEDEKLKKIPVIVLSKNKDPEVEKECLEGGADYYVPKPFDLEELMEIIKKLLE
868	MKSILLVDDSEELRKKISEALKSEGYTVTFARDGKEALEKLKEKLPDLIIVDLRMPEMNGYELLKILKENEELKKIPVIVISRDKSPEVKEEALKLGANKYIPKPFDLEELMAVVKELLN
869	MKTVLLVDDSEELREEISKALESRGYKVIWAPNGLEALEKLKEFLPDLIILDLDMPPMNGFEVLRILKNDPELREVPVVVLSRDTSPEVRERALELGADAYVPKPFDLEELMEIVEKLLN
870	MKKILLVDDSEELRKKISKALESRGYEVIFARNGKEALKKLEEFLPDLIIVDLEMPEMDGFELLKKLKNDEELKKIPVVVLSRDRSPEVEEECLKLGADAYVPKPFDLEELMKIVEKLLN
871	KKKVLVVDDSEELREKITKALESKGYSVVWARNGEEALKKLEKFLPDLIIVDLDMPPMNGFELLEILKNDEKLKKIPVIVLSRDTSPEVEKKCLEAGADAYIPKPFDLEELMEVAEKLLN
872	MKSVLLVDDSEEERKRIKEALESEGYTVIEAPDGVAALEKLKEFLPDLIIVDLEMPKMDGFELLKKLKEDEKLKNIPVIVLSKDTSPEVEKKCLELGADAYIPKPYDLEELMEVAKKLLE
873	MKSVLLVDDSEELREEIARALESEGYTVVLAPNGIEALEKLKEFLPDLIIVDLRMPPMNGFELLKKLKEDEKLKKIPVVVLSADTSPEVKEKCLKLGANKYVPKPFDLDELMRVVRELLE
874	MKSVLLVDDSEELRERISRALRSRGYTVVFARDGVEALEKLKEFTPDLIIVDLRMPPMDGFELLKILKENEKLKNIPVIVLSRNTDPEVEKEALELGANKYIPKPFDLEELMRVVEELLN
875	MKTILLVDDSEELREEISKALESEGYKVIFAKDGVEALEKLEKQLPDLIIVDLKMPPMDGFELLERLKNDEKLKKIPVIVLSSDTSEEVKKEALEKGADKYIPKPFDLEELIKEIKKLLN
876	MKSVLLVDDSEELREKISKALKSRGYTVIYAKDGIEALEKLKEFLPDLIIVDLNMPKMNGFELLKILKNDEKLKNIPVIVLSRDSSPEVRERALELGANAYIPKPFDLEELMEVAEKMLN
877	MKSVLLVDDSEELRKLISEALESRGYTVTLARDGIEALKKLEEFLPDLIIIDLDMPKMNGFELLKILKNDEKLKKIPVIVISANKDEEVKERALEAGADAYVPKPFDLEELMEIAEKLLN
878	MKTVLLVDDSEELREKIAEALKSRGYKVIFAPNGVEALEKLEKFTPDLIIVDLDMPPMNGLELLERLKNDPKLREVPVIVLSRDTSPEVERRALEAGADAYIPKPFDLEELMKVVEELLN
879	MKSVLLVDDSEELRERISAALRSRGYTVTFARNGKEALEKLEEFLPDLIIVDLDMPEMDGFTLLKILKNNEELKKIPVIVLSGDTDPEVEEKCLKLGADKYVPKPFDLEELMAVAEELLN
880	MKRVLVVDDSEELRERITRALRAEGLEVVWAPDGVEALKKLEEFLPDLIIVDLDMPEMDGFELLKKLKNDPELRKVPVIVLSRNTDPEVEQRCLEAGADAYVPKPFDLDELMAVARKLLN
881	MKSVLVVDDSEELREKITKALESEGYSVTWAPDGIEALEKLKEFLPDLIIVDLRMPKMDGFTLLKILKNDEKLKKIPVIVISADKSPEVKKKCLEAGANKYIPKPFDLEELIKVAKELLE
882	MKSVLLVDDSEELRKRITAALEAEGYTVVWAPDGISALEKLKKFKPDLIILDLRMPPMDGFELLKILKENEELKNIPVIVLSSDTSPEVKEKALELGANKYIPKPFDLDELMAVARELLN
883	MKSILLVDDSEELAERIKAALESEGYSVTLAPDGIEALKKLEKFLPDLIIVDLKMPPMNGFELLKILKNDEKLKNIPVVVISADKSPEVKKKCLELGANAYIPKPFDLEELMKVIKKLLN
884	MKSVLVVDDSEELRERITAALEARGYTVTLAPDGVAALEKLEEFLPDLIIVDLRMPPMDGLELLRRLREDPELREVPVIVLSADTSPEVRERCLEAGADAYVPKPFDLDELMAIAEELLN
885	MKSVLLVDDSEELREKIKKALESEGLTVTLAEDGIEALEKLKKFLPDLIILDLRMPKMNGLELLKILKEDEKLKNIPVIVLSRNTDPEIEKECLELGANAYIPKPFDLEELMEVVKKMLN
886	MKSVLLVDDSEELQKEIAAALESRGYTVVFAPDGVAALEKLKEFLPDLIIVDLRMPPMDGFELLEILKNDEKLRNIPVIVLSADTSPEVEERALKAGANAYVPKPFDLEELMAIADEMLN
887	MKSVLLVDDSEELRKKISEALESEGLTVVFAPDGIEALEKLKEFLPDLIIVDLRMPKMNGFELLKILKNDEKLKKIPVVVISGDKSPEVEKEALELGADKYVPKPFDLEELMRVVKELLE
888	MKTVLLVDDSEELRKEIKKALESEGYKVILAKDGIEALKKLEKFLPDLIIVDLDMPPMDGLTLLKILKENEELKNIPVIVLSGDTSEEVKKRCLEAGANKYIPKPFDLEELIKVAKELLN
889	MKSVLLVDDSEELRERIRAALESRGYTVVEAPDGIAALEKLKEFLPDLIIVDLRMPKMDGFTLLKTLKNDPKLKNIPVIVLSRDTSPEVEKKCLELGANKYVPKPFDLDELMAVAEELLN
890	MKKVLVVDDSEELREKITKALESEGLKVVWAPNGKEALEKLKEFLPDLIILDLRMPDMNGFEVLKKLKNDPKLKKIPVIVLSGNTDEEVKKEALEAGANAYIPKPFDLEELMKVAKKLLE
891	MKKILLVDDSEELRKKIKEALESKGYEVVEAPNGVEALEKLKEFLPDLIIVDLEMPPMDGFELLRKLAEDPELRKIPVVVLSRDTDPEVEKRCLEAGASAYVPKPFDLEELMEIVEKLLN
892	MKSVLLVDDSEELAKEISAALESRGYTVTLAPDGVAALEKLEEFLPDLIIVDLRMPPMDGLTLLRKLREDPELRKIPVVVLSADTDPEVERRCLEAGADAYVPKPFDLEELMAVVEELLN
893	MKRVLLVDDSEALAERITAALRAEGYEVVLAPDGVEALRRLEEFLPDLIILDLRMPPMDGFEVLRRLAEDPALRGVPVLVLSADTDPEVRERALAAGADAYVPKPFDLDELLAVARRLLE
894	MKSVLLVDDSEELRERIAAALEARGYTVTLARDGIEALKKLEEFLPDLIIVDLEMPPMDGFELLKKLKNDEKLKEIPVLVLSRNTDPEVEKKALEAGADYYLPKPFDLDELMAVVEELLN
895	MKSVLLVDDSEELRERITAALESEGYSVVTAPDGISALEKLKEFLPDLIIVDLRMPPMDGFELLKILKEDEKLKKIPVIVLSSDTSPEVEKKCLELGANAYIPKPFDLEELMAVAKKLLN
896	MKTVLVVDDSEELRKKITEALESEGYKVIWAPDGKEALEKLKEFLPDLIIVDLRMPEMDGFELLKILKNNEELKKIPVVVLSRDKSPEVEKKALEAGANAYVPKPFDLEELMAVVKKLLN
897	MKTILLVDDSEELQERITKALESRGYKVVRARDGIEALEKLKKFLPDLIIVDLRMPPMNGFELLEILKNDEELKKIPVVVLSRDTDPEVKERCLKLGADKYVPKPFDLDELMKVVEELLN
898	MKSILLVDDSEELREEISKALKSRGYTVTYAPNGIEALKKLEKFLPDLIIVDLEMPPMNGLELLKILKNDEKLKNIPVIVLSADKSPEVEEEALKAGANAYVPKPFDLEELMKIVEKLLN
899	MKSILLVDDSETLRKEISRALESRGYTVIWARDGKEALEKLEEFLPDLIIVDLRMPEMDGFELLKTLKENEELKKIPVIVLSADTSPEVRKRCLEAGANAYVPKPFDLEELMEVVEKLLN
900	MKKVLLVDDSEELQKEIKKALESEGYEVILAKNGKEALEKLEKELPDLIIVDLEMPEMDGLEFLKILKNNEELKNIPVIVISRRKDPEVKEECLKAGANAYIPKPFDLEELIEVIKKLLE
901	MKSVLLVDDSEEEREEIAKALESKGYKVIYARDGIEALEKLKEFLPDLIIVDLRMPKMNGYELLKILKNDEKLKNIPVIVISGDTDPEVREEALKLGANYYIPKPYDLEELIEVAEKLLN
902	MKKVLVVDDSEALRERIVAALEAEGYSVVLAPDGIEALEKLEEFTPDLIIVDLRMPPMDGFTLLKILKENEKLKKIPVVVLSRDTSPEVEKEALEAGADAYVPKPFDLEELMAIVRKLLN
903	MKSVLLVDDSEELREKITKALKSRGYTVIEARDGVEALEKLKKQLPDLIIVDLDMPPMNGFELLKILKNDEELKKIPVIVLSANTDPEVEEEALKAGADAYVPKPFDLDELMEVAEKLLN
904	MKSILVVDDSEELREKITKALESEGYSVTLAKNGIEALEKLKKKLPDLIIVDLRMPEMDGFELLKKLKEDEKLKEIPVIVISGDTNPEVEKEALELGADKYIPKPFDLEELMKVVKELLE
905	MKSVLVVDDSEELRKKITEALESEGYSVVLAPNGVEALEKLKEFLPDLIIVDLRMPPMDGLELLKKLAENEELKKIPVVVLSRDTSPEVREKALKAGANKYIPKPFDLEELMKVVKELLN
906	MKSILLVDDSEELQEEIAKALESRGYTVIRARNGIEALEKLKKSLPDLIIVDLRMPPMDGFELLEILKNDEELKKIPVVVLSGDTDPEVEERCLKAGANAYVPKPFDLEELMAVVEELLN
907	MKSILLVDDSEELRKKISEALESEGYKVIWAPDGIAALEKLKEFLPDLIIVDLRMPPMDGFTLLRILKEDEKLKKIPVIVLSRDTSPEVEEKCLELGADKYVPKPFDLEELIEEVKKLLE
908	MKTVLLVDDSEEERELISKALKSRGLKVIFAPDGVAALEELEKQLPDLIILDLRMPKMDGFEVLKILKNNEKLKKIPVVVISGDTDPEVKERCLEAGADAYIPKPYDLDELMEVVEKLLN
909	MKTILLVDDSEELREKIEEALKAEGYKVIRARDGIEALEKLKEQLPDLIIVDLRMPPMDGFELLRILKNDPKLKKIPVVVISRDRSPEVRERALEAGADKYVPKPFDLEELMAIVKELLE
910	MKSILLVDDSEELRERIAAALESRGYTVTLARDGIEALEKLKKFLPDLIIVDLRMPKMNGFELLKILKEDEKLKKIPVVVVSADTDPEVKEKALEAGADAYVPKPFDLDELMEVVEELLN
911	MKSILLVDDSEEEREKITKALESEGYTVIYARDGIEALEKLKKELPDLIILDLRMPKMNGFEVLKILKNDEKLKKIPVIVLSGDTSPEVEKKALELGANAYIPKPYDLEELMKVVKKLLN
912	MKRVLVVDDSEELRKRISAALESRGYSVVWAPDGVAALEKLKEFLPDLIIVDLEMPPMDGLTLLEILKNDPELRKIPVVVLSADTDPEVRERCLAAGADRYVPKPFDLDELMAVVEELLN
913	MKSVLLVDDSEELQEEITAALESEGYTVVRARDGIEALKKLEKFLPDLIIVDLEMPEMDGFELLKKLKEDEKLKKIPVIVLSSDTSPEVEKKCLELGANKYVPKPFDLDELMAIAKELLN
914	MKSILLVDDSEELRKKISEALESEGYTVKLARNGKEALEKLKEFLPDLIIVDLRMPEMDGFTLLKILKEDEELKNIPVIVLSADTDPEVKERCLELGADKYVPKPFDLEELIEVVKELLN
915	MKKVLLVDDSEELRKKITEALESEGYEVIWARDGKEALEKLKEFLPDLIIVDLKMPEMDGFTLLEILKNDPKLKKIPVIVLSGDTSEEVKKRCLEAGADAYIPKPFDLEELIEVAKKLLN
916	SKSVLLVDDSEELRERISKALKSRGYTVVYAPNGIEALEKLKEFLPDLIILDLRMPPMNGFEVLKILKNDEKLKNIPVIVLSGDTSPEVEKEALEAGANAYIPKPFDLEELMAVAEKLLN
917	MKSVLLVDDSEELREEIAAALEAEGYTVTFAPDGVAALEKLKEFLPDLIILDLKMPPMDGFELLKILKNDEELKNIPVVVLSADTSPEVEKECLELGADKYIPKPFDLEELMAVVRELLE
918	MKTILLVDDSEELRKRIAAALESRGYKVIWARDGVEALEKLKEFLPDLIIVDLRMPPMDGLELLRRLKEDEELRKVPVVVLSADTDPEVEQRCLEAGADAYVPKPFDLDELMAVVDELLE
919	MKSVLLVDDSEELRAEIAAALEAEGLTVTLAPDGVAALEALEKQLPDLIIVDLRMPPMDGLELLRVLAEDPELRKVPVLVLSADTSPEVRRRCLEAGASAYVPKPFDLAELMATVRALLN
920	MKSILVVDDSEELREKITKALESEGYTVVLARNGKEALEKLEEFKPDLIIVDLDMPDMDGFTLLEKLKNDEELKNIPVVVLSRNTDPEVRERCLEAGADAYVPKPFDLDELMEIVKELLN
921	MKSVLVVDDSEELRKRITEALESEGYTVVLAPDGIEALKKLEEFLPDLIILDLRMPPMDGFTLLKKLKNDEKLKNIPVIVISRDTSPEVRKKCLELGANAYVPKPFDLEELMEVAKKLLN
922	MKSILLVDDSEELRKRISEALESKGYTVVLARDGIEALKKLEEFLPDLIILDLDMPPMNGFELLKKLKEDEKLKNIPVVVLSRNTSPEVEKEALEAGANAYIPKPFDLDELIEVVEKLLN
923	MKSVLLVDDSEELAERIRAALESRGYTVVLAPDGVAALEKLEEFLPDLIIVDLRMPPMDGLELLRRLAEDPELRGVPVIVLSADTSPEVERECLEAGADAYVPKPFDLEELMEIAERLLN
924	MKSILLVDDSEELRERISKAIESEGYSVIYAPNGIEALKKLEKELPDLIIVDLKMPDMDGFTLLKILKNDEKLKKIPVIVLSADKSPEVEKECLELGADKYVPKPFDLEELMKIIKELLN
925	MKSVLLVDDSEELRERIAAALEARGYTVTWAPDGVAALEKLKESLPDLIIVDLRMPKMDGFELLKILKEDEKLKEIPVVVLSADRDPEVEEEALKAGADKYVPKPFDLEELMAVVEELLN
926	MKTILLVDDSEELRKKISEALESRGYKVIWAPNGIEALEKLKEFLPDLIIVDLEMPPMNGLELLKVLKNDEKLKNIPVVVLSARTDPEVEKECLEAGADKYVPKPFDLEELMEIVEELLN
927	MKSVLLVDDSEELRKLISKALESEGYSVIFAKNGKEALEKLKEFLPDLIIVDLEMPEMNGLELLKKLKEDEKLKNIPVIVISKDKSEEVKKKCLEAGANAYIPKPFDLEELIKVAKELLN
928	MKRILLVDDSEELREEISKALRSEGYEVIWAPDGVEALKKLEEFLPDLIIVDLDMPEMNGFELLEILKNDEELRKVPVVVLSGNTDPEVEKRCLEAGADAYVPKPFDLEELMEIVKKLLN
929	MKSVLLVDDSEELRERISAALRAEGYTVIWARDGIEALEKLKEFLPDLIILDLDMPPMNGFELLEILKNDEKLREIPVVVLSADTSPEVRQRALEAGADAYVPKPFDLEELMAVVRELLN
930	MKTVLLVDDSEELREEIAAALEAEGYKVVFARDGVEALKKLEKFLPDLIILDLDMPEMDGFELLKKLKEDEKLKKIPVVVLSADTSPEVKERCLKGGADAYVPKPFDLDELMAIVRKLLN
931	MKSILLVDDSEELREKISKALESEGYKVIYAPNGIEALKKLEEFLPDLIILDLRMPPMDGFTLLKILKNNEELKKIPVVVLSSDTSPEVKKKCLELGANKYVPKPFNLEELIKIIKELLN
932	MKSILLVDDSEELQKEIAEALESEGYTVVRAPDGISALEKLKEFLPDLIICDLDMPPMDGLELLKILKNDEKLRNIPVVVLSGDKSPEVEKRCLEAGANAYIPKPFDLEELMEVVKKLLN
933	MKSVLVVDDSEEERERITAALEAEGLTVTWARDGIEALKKLEKSLPDLIIVDLNMPKMNGLEFLKILKNNEKLKKIPVVVISSNTDPEVKKECLEAGANAYIPKPYDLEELMEVVKKLLN
934	KKKILLVDDSEELREEIAKALEEEGYEVIFAPNGIEALEKLKEFLPDLIILDLDMPPMNGFEVLRILKNDPKLREIPVIVLSRDTSPEVRERCLEAGADKYIPKPFDLEELMKVVKELLE
935	MKSVLLVDDSEELQKKITEALESEGLTVIRAPDGIEALKKLEEFLPDLIIVDLRMPPMNGFELLRVLKEDEKLREVPVVVISGDTSPEVEERCLEAGANYYVPKPFDLEELMEIVKKLLN
936	MKKVLLVDDSEEEREEITKALKSEGYSVVTAPDGVAALEKLKEFLPDLIIVDLDMPKMNGFELLKILKENEELKKIPVIVLSSDTSEEVKEEALKAGANYYVPKPYDLEELIKVAKKLLN
937	MKSVLLVDDSEELRKLISEALESEGLTVVFAPNGIEALEKLKEFLPDLIIVDLRMPPMDGFELLKILKNDPKLKKIPVVVLSRDTSPEVEKKCLELGANAYVPKPFDLNELMEIVKKLLE
938	MKSILLVDDSEKERKEIAKALESRGYTVTFARDGKEALEKLKKFLPDLIIVDLRMPEMNGFELLKILKNDEKLKKIPVVVISRNKDEKVKEEALKLGADKYVPKPFDLEELMKIVEELLN
939	MKSVLLVDDSEELRERIAAALEAEGYKVVLAPNGKEALEKLKKFLPDLIIVDLRMPPMDGFTLLKILKNDEKLKNIPVVVLSADTTPEVKKRCLEAGANKYVPKPFDLEELMAVVRELLN
940	MKTVLLVDDSEELRKKISKALESEGYKVIFAKDGVEALKKLEEFLPDLIIVDLRMPKMNGFELLKKLKENEELKKIPVIVLSADTSPEVKKRALELGANAYIPKPFDLEELMKVAKKLLN
941	MKSVLLVDDSEELAERIAAALEAEGYTVVRARDGVEALRALEERLPDLIIVDLDMPPMDGLELLRTLANDPALRKVPVVVLSADTSPEVRRRCLEAGASAYVPKPFDLAELMEVVRRLLE
942	MKSVLLVDDSEELRKRISEAIESEGYTVTFAPDGVEALEKLEKFLPDLIIVDLRMPPMDGYELLKKLKEDEKLKKIPVIVLSSNTSEEEKKRCLELGANKYVPKPFDLDELMEIIKELLN
943	MKRVLLVDDSEALRERIAAALRSRGYEVVPAPDGIEALKKLEKFLPDLIIVDLRMPPMDGFTLLKKLKEDEKLKEIPVIVLSADTSPEVEEECLKGGANAYVPKPFDLEELMEIAEKLLN
944	MKSILLVDDSEELRKKISAALKSEGYTVVFAPDGVAALEKLKEFLPDLIIVDLRMPPMDGFTLLRILKEDPELRKIPVIVLSRDRDPEVEEECLELGADAYIPKPFDLEELMEVVKKMLN
945	MKSVLVVDDSEELRKEITAALESEGLTVTLARNGIEALEKLKKFLPDLIIVDLDMPPMDGFTLLKILKNDEKLKKIPVIVLSRDTSPEVEKEALELGANAYVPKPFDLEELMAIVRKLLE
946	MKSILLVDDSEELRKKIAEALESEGYSVVLAPNGIEALRKLEEFLPDLIILDLEMPPMDGLTLLKILANNPELRKIPVIVLSRNTDPEIEQKALEAGASAYVPKPFDLEELMEIVKKLLS
947	MKSVLLVDDSEELREEITKAIESRGYKVVYAPDGIEALKKLEKFLPDLIICDLRMPPMDGFTLLEKLKNNPELKKIPVIVLSRNSDPEVKKRCLEAGANAYVPKPFDLEELMEIIEKLLN
948	MKSVLLVDDSEELQEKISKAIESRGYKVVRAPDGIEALKKLEEFLPDLIIVDLEMPPMNGFELLKILKENEKLKKIPVVVLSRNTDPEVREKCLKAGANAYVPKPFDLEELMEIIEKLLN
949	MKKVLVVDDSEELREKITKALKSKGYEVVWARDGIEALEKLKEFLPDLIILDLKMPKMDGYTVLKKLKNDEKLKKIPVIVLSADKSPEVEKRALELGANAYVPKPFDLEELIAIAEKLLN
950	MKSVLLVDDSEELREEIAAALEAEGYTVTLARDGIEALKKLEKFLPDLIICDLRMPEMDGFTLLKILKEDEKLKNIPVLVLSADTSPEVEKECLELGANAYIPKPFDLEELMAVVRKLLN
951	MKSVLVVDDSEEERERISAALEARGYTVVWAKDGVEALKKLEKFTPDLIIVDLRMPPMDGFELLKVLKNDEKLKEIPVVVLSGDTSPEVRERALKLGANAYIPKPYDLDELMAVVEELLN
952	MKSILLVDDSEEEQEEISKALESRGYKVIRAPDGIEALKKLEKELPDLIIVDLKMPKMNGLELLKILKNNEELKKIPVIVLSADTSPEVRKKCLEAGANAYVPKPYDLEELMKIVEKLLN
953	MKTVLVVDDSEELRERITAALEARGYSVILAPDGIAALEKLEKFLPDLIIVDLRMPPMDGFELLKKLKNDEELKKVPVLVLSADRDPEVEERALEAGADAYVPKPFDLEELMAIVERLLN
954	MKTVLLVDDSEELRERIAAALEAEGWKVIRARDGKEALEKLKEFTPDLIIVDLDMPEMDGLTLLKELKNDEKLKKIPVIVLSRNTDPEVEKKCLEAGADAYVPKPFDLDELIEIARKLLE
955	MKSILLVDDSEELRKEISAALESEGYTVTFAPNGIEALEKLKEFTPDLIILDLRMPPMNGFELLKILKEDPKLRKIPVVVLSSDTDPEVEKRALELGANAYVPKPFDLDELIAIIKKLLN
956	MKSVLLVDDSEELRERISKALKSEGYSVVFARNGIEALEKLKKFLPDLIIVDLDMPPMNGFELLKILKEDEKLKKIPVIVISGDTSPEVKEKCLKLGADKYVPKPFDLEELMEVAKELLN
957	MKSVLVVDDSERLRERITAALRAEGLTVTWARDGIEALKKLEEFLPDLIIVDLRMPKMDGLELLKILKENPELKKIPVIVLSRRTDPEVEEEALKAGADAYVPKPFDLDELMALARELLN
958	MKKVLVVDDSEEERKKITEAIESEGYSVVLAKNGIEALEKLKKFLPDLIIIDLRMPEMNGFELLKILKNDEKLKNIPVIVISGNTDPEVKKEALELGADYYVPKPFDLEELMKVIKKMLN
959	MKKVLLVDDSEELRKRIKKALESEGYEVIEAPNGIEALEKLKKFLPDLIILDLKMPPMDGFEVLKILKNDEKLKKIPVVVLSSDTSPEVKEKALEAGANAYVPKPFDLEELIEIVKKLLE
960	MKTVLVVDDSEEEREKITKALESEGYKVILAKDGIEALKKLEKFLPDLIIVDLRMPKMDGLEFLKKLREDEKLKEIPVVVISRDTSPEVKKECLEAGADKYVPKPFDLEELMKIVKELLN
961	MKKVLLVDDSEELRKRITAALESEGLEVVTAPNGIEALKKLEEFLPDLIILDLRMPPMNGFEVLKILKNNEELKKIPVVVLSADTNPEVKKEALELGADKYVPKPFDLEELMAVVKELLE
962	MKSVLLVDDSEELRKRISEALESEGLTVTWAPDGVAALEKLKEFRPDLIILDLRMPPMDGLEVLRRLREDPELREIPVVVLSADTDPEVRERALEAGADRYVPKPFDLDELMEVVRELLE
963	MKSVLLVDDSEELRKKISEALESRGYTVTWARDGIEALEKLKEFLPDLIIVDLRMPKMNGFELLKILREDEKLRDIPVIVLSADTSPEVKEKCLELGADAYVPKPFDLEELMAIAEKLLN
964	MKKVLLVDDSEELREKISKALKSRGYEVVLAPNGKEALEKLEEFLPDLIILDLEMEPMDGLEVLKILKNDEKLKKIPVIVLSRRTDPEVEEECLKAGANAYVPKPFDLEELMKIAEKLLN
965	MKSVLLVDDSEELRERITAALESRGYSVTLARDGKEALEKLKKFLPDLIIVDLRMPEMDGYELLKILKENEKLKNIPVVVLSADTSPEVKKKCLELGANKYIPKPFDLDELMAVVDELLN
966	MKSILVVDDSEELRKEITEALESEGYTVVWAPNGIEALEKLKEFTPDLILVDLEMPPMDGFELLKKLKEDEKLKKVPVVVISKRTDPEVREKALEAGANAYVPKPFDLDELMEIVKKLLN
967	MKSILLVDDSEELRKKISKALESKGYTVVLAKNGIEALKKLKEFTPDLIICDLEMPPMNGFELLKILKNDEKLKDIPVIVLSSDTSPEVKEKCLKAGADKYIPKPFDLEELMEVVEELLN
968	MKSVLLVDDSEELRERIAAALESRGYTVTWAKNGIEALKKLEKFLPDLIIVDLRMPEMDGFELLKILKEDEKLKNIPVIVLSGDTDPEVRKECLELGADKYVPKPFDLDELMAVADELLN
969	MKSVLLVDDSEEERERIAAALRAEGYTVTFAPDGVAALEKLKEFLPDLIIVDLRMPPMDGLTLLRILREDPELREVPVVVLSANTDPEVERECLEAGADAYVPKPYDLAELMAVVRRLLE
970	MKSVLLVDDSEELRKKIAEALESEGLSVVLAPDGVEALEKLKESLPDLIIVDLRMPPMNGFELLKILKEDEELKKVPVVVLSGDSSPEVEKEALEAGADAYVPKPFDLDELMEIVRKLLE
971	MKSILLVDDSEELRKKISEALESEGYKVVFAPNGIEALEKLKKFLPDLIIVDLRMPPMDGYELLKILKNNEELKKIPVIVLSGDTNPEVKKKCLELGANKYIPKPFDLNELMEVVKKLLN
972	MKSVLLVDDSEELREKISKALESEGYKVIYAEDGIEALEKLKEFLPDLIIVDLDMPKMNGFELLKILKEDEELKKIPVIVLSRNTDPEVKERALKGGANAYVPKPFDLEELIAVAKKLLN
973	MKSVLLVDDSEEERKEIAAALEAEGWKVVYARDGKEALEKLKEFLPDLIICDLRMPEMNGLELLKILKNNPKLKKIPVIVLSADTDPEVRKEALEAGADYYIPKPYDLDELIAVAKELLN
974	MKSVLLVDDSEELRERISAALRSRGYTVTWAPNGVEALKKLEKFLPDLIIVDLEMPPMNGLELLKKLKEDEKLKEIPVVVLSGRTDPEVEKECLEAGADYYVPKPFDLEELVRIIEELLN
975	MKSILLVDDSEEEREKISKALKSKGYKVIYAPDGIEALEKLKKSLPDLIILDLNMPKMNGFEVLKILKEDEELKNIPVIVVSSRTDPEVKEEALKLGASAYIPKPYDLEELMEVVEKLLN
976	MKSVLLVDDSEELRKKIAEALKSEGYTVVTAPDGVAALEKLREQLPDLIIVDLRMPPMDGLELLRRLAEDPALREVPVVVLSRDTTPEERERALAAGARAYVPKPFDLDELMAIVRELLN
977	MKSILLVDDSEELQKEIKEALEKEGYSVILAPNGIEALEKLKEFTPDLIIVDLRMPPMNGFELLKILKNDPELKKIPVVVLSADEDPEVKERALELGANAYIPKPFDLEELMEVVKKLLN
978	MKSVLLVDDSEELREKISAALESRGYTVTWAPDGVEALKKLEKFLPDLIIVDLRMPKMNGFELLKILKNDEKLKEIPVVVLSRNTDPEVKKKCLELGADKYIPKPFDLEELMAVVEELLN
979	MKSVLVVDDSEELREEISAAIEKEGYTVTWARNGVEALEKLEKFLPDLIIVDLRMPPMNGFELLKKLKEDEKLKEIPVIVLSADTDPEVKERALELGANAYIPKPFDLDELMEVIKKLLN
980	MKSVLLVDDSEKERKEIAKALESEGYTVTFAPDGIAALEELKKRRPDLIICDLRMPPMNGFELLKILKEDEELKEIPVVVLSRNTSEEVKKECLELGADKYIPKPYDLEELMEVVKELLE
981	MKSVLLVDDSEELAKRIKEALESRGYSVVLAPDGVAALEKLKEFLPDLIIVDLRMPPMDGLELLRILKNDPERRKIPVIVLSADTSPEVEQQCLEAGADAYVPKPFDLEELMEIVEELLE
982	MKSILLVDDSEELQERIAAALESRGYTVRRAPDGVAALEKLKEFLPDLIIVDLEMPEMDGFELLKILKNDEKLKNIPVVVLSANTDPEVEKRALELGANAYVPKPFDLDELMAIVEKLLN
983	MKSVLLVDDSEELRERITAALRAEGYTVVWAPDGVAALEKLKEFTPDLIIVDLRMPPMDGFELLRILAEDPELREIPVIVLSADTSPEVRRRALEAGADAYVPKPFDLDELMAVARELLE
984	MKTVLLVDDSEEERKEITEALESRGYKVIRARDGIEALKKLEKELPDLIIVDLRMPPMNGFELLKILKENEELKEIPVVVLSRDTSPEVEKEALELGANAYVPKPYDLEELMEVVEKLLN
985	MKSVLLVDDSEELRKEIAAALRSRGYTVRLAPDGVAALAALEEFLPDLIIVDLRMPPLDGLELLRRLAADPALRGVPVIVLSADRDPEVERRALEAGADAYVPKPFDLDELMAVADRLLN
986	MKTILLVDDSEELRKKIAEALESRGYKVIFAKDGIEALEKLKEFTPDLIILDLRMPKMDGFTLLKILKNNEKLKNIPVIVISRNTDPEIKEKALKLGANKYVPKPFDLEELMKVVDELLN
987	MKKVLLVDDSEELRKEISEALKSEGYEVVFAPDGKAALEKLEKFRPDLIIVDLEMPPMDGFELLRRLAEDEELREIPVIVLSRDTSPEVRERALRLGADRYVPKPFDLEELIEVAKELLE
988	MKSVLLVDDSEELRKEISEAIEKEGYKVIWAENGKEALEKLEKELPDLIILDLRMPEMNGFEVLKILKNDEKLKNIPVIVLSGDTSEEVKKKALEAGADKYIPKPFDLEELMKVIKELLE
989	MKTVLVVDDSEELRKKITAALESEGLKTIWAPDGKEALEKLKKELPDLIIVDLRMPPMDGFELLKILKEDEKLKKIPVIVISANTDPEVEKKALELGADKYVPKPFDLEELMKVAKKLLN
990	MKKVLLVDDSEELRKKISEALKSEGYSVVYAPNGIEALEKLKEFLPDLIICDLDMPPMNGLELLKILKNNEELKKIPVIVLSRDTNPEVEKKCLEAGANAYVPKPFDLEELMKIVKKLLN
991	MKTILLVDDSKELREEIKKALESRGYKVIEAPDGKEALEKLKKFLPDLIILDLRMPEMDGFEVLKILKNNPELKNIPVIVISADTDPEVEKKALEAGADKYVPKPFDLEELMKVVEELLN
992	MKSVLVVDDSEELRKEITAALESRGYKVVWAPDGKEALKKLEKFLPDLIIVDLRMPPMNGFELLKELKNNEKLKKIPVIVLSGDTSEEVKKEALELGADKYVPKPFDLEELMKIAEELLN
993	MKSVLLVDDSEELRERIAAALRSRGYTVVYAPDGVAALEKLKEFRPDLIIVDLRMPPMDGLELLRVLREDPELRDIPVVVLSRDTSPEVRERCLELGADAYVPKPFDLEELMAVVEELLN
994	MKSVLLVDDSEELRKKITEALESKGYTVVLAKNGIEALEKLKKFLPDLIICDLEMPPMNGFELLKILKNNEKLKNIPVIVLSKNTDPEIKKKCLEGGANAYIPKPFDLEELIKVIEKLLN
995	MKSILLVDDSEELRDRITEALESRGYTVIRARNGIEALEKLKEFLPDLIILDLRMPPMNGLEVLKILKNDEKLKKIPVVVLSGDTSPEVKERCLEAGADAYIPKPFDLEELMEVVEKLLN
996	MKSVLVVDDSEELREEITAALEAEGLSVIRAPDGIEALEKLKEELPDLIIVDLEMPPMDGFELLKILKEDEKLKEIPVVVLSADSSPEVEERCLEAGADVYVPKPFDLEELMAVVRRLLE
997	MKSVLLVDDSETLRKKISKALESEGYKVVWAKDGIEALEKLKEFLPDLIIVDLRMPKMDGFELLKKLKENEELKKIPVIVISADTDPEVKEKCLKLGANAYVPKPFDLEELIKIAKKMLN
998	MKTVLLVDDSEELRERISAALESEGYKVVWARDGVEALEKLKEFLPDLIIVDLRMPPMDGFELLKILKENEELKKIPVIVLSADTSPEVEKKCLELGANYYIPKPFDLEELMAVAKKLLN
999	MKSILLVDDSEELREKISKALESRGYTVTWAPDGVEALEKLKKFLPDLIIVDLRMPPMNGFELLKILKEDPELKNIPVVVLSADTTPEVKERALELGADAYVPKPFDLEELMKVIEELLN
1000	MKSILLVDDSEEERKKIAEALEKEGYTVKFARDGIEALEKLKEFKPDLIIVDLRMPKMDGFELLKILKEDEELKNIPVVVLSGNKSPEVEEEALKLGANAYVPKPYDLEELMEIVKKLLE
1001	SKSVLVVDDSEELRERITAALRAEGLTVVWAPDGVAALEKLEEFTPDLIIVDLEMPPMDGFELLRRLANDPRLRDVPVLVLSADTSPEVEERCLRLGANAYVPKPFDLAELMAVVRALLE
1002	MKSVLVVDDSEELRKEITEALESKGYTVTLAPDGIEALKKLEEFLPDLIIVDLRMPPMNGFELLRILKNDEKLKEIPVIVLSGDRDPEVRKRCLELGANAYVPKPFDLEELIEVAEKLLN
1003	MKRVLLVDDSEELREEIAAALEAEGLEVVLAPDGVEALRKLEEFLPDLIILDLEMPPMNGLELLRRLAEDPELREVPVVVLSADSDPEVRERCLAAGAHAYIPKPFDLEELMAVVRELLE
1004	MKTVLVVDDSEELRKEITAALESKGYKVIWAPDGIAALEKLKEFLPDLIIVDLRMPKMNGYELLKILKNDEKLKNIPVIVLSANTNPEEKKRALELGANAYIPKPFDLEELMEVADKLLN
1005	MKKVLVVDDSEELRKKITEALEKEGLEVVWAKDGEEALEKLKKFLPDLIIVDLRMPKMNGFELLKILKNDEELKKIPVIVLSRDTDPEVEKEALELGADKYVPKPFDLEELMEIVKKLLE
1006	MKKILVVDDSEELREKITKALESRGYEVIWAKDGIEALEKLKKFLPDLIILDLRMPPMDGLELLKILKEDEELKKIPVIVISADTSPEVEKECLEAGADYYVPKPFDLEELMEIIEKLLN
1007	MKSVLLVDDSEELREKITAALKSRGYTVITAPNGKEALEKLEKELPDLIILDLRMPPMDGFTLLKILKENEKLKNIPVIVLSGRTDPEVEKEALEAGADAYIPKPFDLEELMAVADELLN
1008	MKSILLVDDSEELRAEIAAALEAEGYTVVFAPDGVEALEKLEKFKPDLIIVDLRMPKMDGFELLKKLKNDEELKGIPVLVLSADTDPEVEKRCLEAGADAYVPKPFDLEELMRIVRELLE
1009	MKSVLLVDDSEEEREEISKALESEGYSVIFAPDGVAALEKLEESLPDLIIVDLEMPPMDGFTLLRRLAEDPELREIPVIVLSGDTSPEVRRRCLEAGADAYVPKPYDLEELMEIAKELLN
1010	MKRVLLVDDSEELRKRIAAALESEGYTVVFAPDGVEALEKLEEFLPDLIILDLRMPPMDGLELLRRLAEDPELRDIPVIVLSADTSPEVRERCLEAGADAYVPKPFDLEELMAIARELLE
1011	MKSVLLVDDSEELRKKISEALESRGYTVTWAPNGVAALEKLKEFLPDLIIVDLRMPPMNGFELLKILKNDEKLKKIPVIVISGNTDPEVEKEALELGANKYIPKPFDLEELMKVAEELLN
1012	MKSVLLVDDSEALRERITAALEAEGLTVITAPDGIAALKKLEEELPDLIILDLDMPEMNGFELLEKLKNDEKLKKIPVVVLSADTSPEVEERALKAGADAYIPKPFDLEELMAVVRELLE
1013	MKSVLVVDDSEELREKITKALESEGYTVVWAPNGIEALEKLEKFLPDLIIVDLKMPPMDGLTLLKILKNDEKLKKIPVIVLSGDTSPEMKEKCLKLGADAYIPKPFDLEELMKVVKELLN
1014	MKSVLLVDDSEEEREKIAKALESEGLTVVRAPNGIEALKKLEEFLPDLIIVDLRMPPMNGFEFLKKLKNDEKLKKIPVVVLSSNTDPEIKKLALEAGANAYVPKPYDLDELMEIVKKLLE
1015	MKSVLVVDDSEELRKRITEALESEGWTVVLAKNGKEALEKLKKFKPDLIILDLKMPPMNGFELLKILKEDEELKNIPVIVLSRNTDPEVKKEALEAGANAYIPKPFDLDELIEVAKKLLN
1016	MKRVLLVDDSEELRERIAAALRARGYEVVFARDGVEALEKLKEFLPDLIIVDLRMPPMDGFELLKILKEDPELRKVPVVVLSRDTSPEVEKECLELGADAYVPKPFDLEELMAVIDELLN
1017	MKSILLVDDSEELRERITAALEARGYTVVRARNGVEALEKLKKFLPDLIIVDLRMPPMDGFELLKILKNDEKLKEIPVVVLSADTDPEVEEEALKLGADKYVPKPFDLEELMAVVEELLS
1018	MKKVLLVDDSEELRERIAAALEARGYSVVRAPNGIEALEKLKEFLPDLIIVDLEMPPMNGFELLKILKEDEKLKNIPVVVLSGNTDPEVEEKALKAGANAYVPKPFDLDELMAVVEKLLN
1019	MKSVLLVDDSEELRAEIAAALEARGYTVVLAPDGIAALEKLKEFKPDLIIVDLRMPPMDGFTLLKILKEDEELKNIPVVVLSANTDPEVKQRALELGADKYIPKPFDLEELMAVVEELLN
1020	MKKILLVDDSEELQERIAAALEAEGYEVVRAPNGIEALEKLKKFLPDLIIVDLDMPPMNGLELLKILKNNEELKNIPVIVLSANTNPEIEKECLELGADYYVPKPFDLEKLMEVVRKLLN
1021	MKSILVVDDSEELRKRITEALESRGYTVVLARDGIEALEKLKEFLPDLIIVDLKMPPMNGFELLKILKNNEKLKNIPVIVLSADTNPEVKKKALELGANKYIPKPFDLEELMKVVEKLLN
1022	MKSVLLVDDSEELQERIAAALESEGLTVVRARDGVEALRRLEESLPDLIIVDLRMPPMDGLALLRRLREDPRLRGVPVVVLSGNSDPEVEREALEAGADAYVPKPFDLEELMAVVRRLLE
1023	MKSILLVDDSEELRKEISKAIESKGYKVIFARDGVEALKKLEEFLPDLIIVDLDMPPMNGLELLKKLKENEKLKNIPVVVLSADTSPEVEKEALEAGANAYVPKPFDLEELMKIIEKLLN
1024	MKSVLLVDDSEELRKRIAKALEAEGYTVVFAPDGIEALEKLKEFLPDLIILDLEMPPMNGEEVLRTLKNDEELKKIPVIVLSSDTSPEVEKRALELGADAYVPKPFDLEELMAIAKELLE
1025	MKTVLLVDDSEELRKLISEALESRGYTVIWAPDGIEALRKLEEFLPDLIIVDLRMPPMDGLELLRRLAADPRLRGVPVLVLSANTDPEERERALAAGADAYVPKPFDLDELMAIVDELLE
1026	MKSILLVDDSEELRKKIKKALESEGYKVIEAKDGIEALKKLEKFLPDLIIVDLEMKPMDGFELLKKLKNDEKLKNIPVVVLSRNTSPEVEKKCLELGANKYIPKPFNLEELIEVVKKLLN
1027	MKKVLVVDDSEEERKRITEALKSEGYEVVWAPNGIEALEKLKEFLPDLIIVDLRMPPMDGFTLLEILKNDPKLRNIPVLVLSADTSPEVRERALAAGADAYVPKPYDLDELMAVVKELLE
1028	MKKILLVDDSEELREKITKALESKGYSVILARNGIEALEKLKKFLPDLIILDLRMPPMNGLEVLKILKEDEKLKKIPVIVISRDTDPEVKEECLKAGADAYIPKPFDLEELMEVVEKLLN
1029	MKSILLVDDSEELREEITKALESRGYKVILAPDGIAALEKLKEFRPDLIIVDLDMPPMNGFELLKILKNDEELKKIPVLVLSGDTDPEVRERALKLGANAYVPKPFDLEELMKIVEKLLN
1030	MKSVLLVDDSEELRERIAAALEAEGYTVVWARDGKEALEKLEKFLPDLIIVDLDMPEMDGLELLERLANDPRLREVPVIVLSRDTSPEVRERALAAGADAYVPKPFDLDELLAVARRLLE
1031	MKKILLVDDSEELRKEISKALKSEGYEVIEARNGIEALEKLKKFLPDLIIVDLEMPPMNGFELLKILKNNEELKKIPVIVLSKDSSEEVKEEALKLGANKYVVKPFDLDELMKIVKELLN
1032	MKTILLVDDSEELRKKIAEALESRGYKVVFARNGIEALEKLKKFLPDLIIVDLRMPPMNGLELLKILKEDEELKKIPVVVVSGNTDPEVKKKALEAGADAYVPKPFDLEELMKIIEKLLN
1033	MKSILLVDDSEELRKKIAEALESRGYTVVWAPDGIEALEKLKEFLPDLIIVDLEMPPMDGLTLLKILKEDEKLKNIPVVVLSRDTSPEVREKCLKAGANYYVPKPFDLEELMEVVEKLLN
1034	MKTVLLVDDSEELREEISRALESRGYKVIFAKDGKEALKKLEEFLPDLIIVDLEMPEMDGFELLKKLKENPELKKIPVIVLSGDTSPEVEKRCLELGADAYIPKPFDLEELMEVAEKLLN
1035	MKSILLVDDSEEERERIAEALRSEGYTVTFAPDGEEALKKLEKFLPDLIIVDLRMPPMDGLTLLRILAEDPKLREIPVIVLSRDTDPEVRERCLKAGANAYVPKPYDLEELMEIVRELLE
1036	MKKVLLVDDSEELRKEIAEALESRGYSVIFAKDGIEALEKLKKFTPDLIIVDLRMPKMDGFELLKILKNDEKLREVPVVVISRDTDPEVKEECLKLGADKYVPKPFDLEELMAVVEELLE
1037	MKSVLVVDDSEELRERITKALESRGYTVIYAPNGIAALEKLKKTLPDLIIVDLDMPPMDGFTLLKILKNDEELKKVPVVVLSRDTSPEVKEKALKAGANYYVPKPFDLDELMEVVEKLLN
1038	MKSVLLVDDSEELREEIKKALESRGYKVVLAKNGKEALEKLKKFLPDLIILDLRMPEMNGFEILKILKNDPKLKKIPVIVLSADTDEEVKKKCLEAGANYYVPKPFDLEELMEIVEKLLN
1039	MKSVLLVDDSEELRKEIAEALESRGYSVTFAPDGVAALEKLREFLPDLIIVDLEMPPMDGLELLRRLAADPELRKVPVVVLSRRTDPEERERALAAGADAYVPKPFDLEELMEIVEKLLN
1040	MKTILVVDDSEELRKKISKALESRGYKVIWAPDGIAALKKLEEFLPDLIICDLRMPKMDGYELLKILKENEKLKKIPVIVLSSNTDPEVKERCLKLGANAYVPKPFDLEELMKIVEKLLN
1041	MKRVLLVDDSEELQEKITAALESRGYTVIRAPNGIEALEKLKEFLPDLIIVDLRMPPMDGFEFLKILKNNEELKNIPVIVLSANTDPEVEKEALEAGADAYIPKPFDLEELMAVADKLLN
1042	MKKVLLVDDSEEERKEISEALKKEGLEVIFARNGIEALEKLKEFLPDLIIVDLEMPPMNGLELLKILKNDPELKKIPVIVLSRNTDPEIREKCLEAGADAYIPKPYDLEELMEVAKKLLN
1043	MKTVLLVDDSEELRERIAAALESRGLTVVWAPDGVAALEKLEEQLPDLIIVDLRMPPMDGFTLLRRLREDPALREIPVVVLSADTSPEVRERALALGADAYVPKPFDLDELMAIVERLLE
1044	MKSILLVDDSEEERKKIAEALESEGYTVIFAPDGIEALEKLEKSLPDLIIVDLNMPKMNGFELLKILKNDEKLKNIPVVVLSSDTSPEVKEKALEAGANAYIPKPYDLEELIKVIKKLLN
1045	MKSVLVVDDSERLREEITKALKSRGYTVTWARNGVEALEKLEKFLPDLIIVDLRMPPMDGYELLKKLKNDPKLRKIPVVVLSADTSPEVRERALELGADAYIPKPFDLEELMKVVEKLLN
1046	MKTILLVDDSEKLAEKIKKALESRGYKVILAPDGISALEKLKEFLPDLIIVDLRMPPMNGFELLKILKEDEKLKNIPVVVISKNKDPEVEKECLEAGANAYIPKPFDLEELMEVVEKLLN
1047	MKTVLVVDDSEELRKRITEALESRGYKVIWARDGVEALEKLKEFLPDLIIVDLRMPPMDGLELLRILANDPKLRDIPVVVLSADTSPEVREEALAAGADAYVPKPFDLEELMEVVEELLN
1048	MKTVLLVDDSEELRRRISAALESRGYKVIWARDGKEALEKLKEFLPDLIIVDLEMPPMNGLELLKILKNDPELKKIPVIVLSKNTDPEVKEKCLKAGANAYIPKPFDLEELMAVAEKLLN
1049	MKSVLLVDDSAELRERISAALKARGYTVVEAPDGVEALKKLEEFLPDLIIVDLRMPPMDGLTLLEILKNDPERRKIPVVVLSADTDPEVRKRALEAGANAYVPKPFDLEELMAVVEKLLN
1050	MKTVLVVDDSEELRKKITEALESEGWKVIWAENGVEALEKLKKFLPDLIIVDLRMPPMDGFTLLKELKENEELKKIPVIVLSADTDPEVKEKALKAGANAYVPKPFDLEELIEIAKKLLN
1051	MKSVLLVDDSEELREKISKALESEGYSVTWAPDGVAALEKLAESLPDLIILDLRMPPLDGFELLRRLAADPELRKVPVVVLSADTSPEVEARALAAGADAYVPKPFDLEELMEVVRKLLN
1052	MKSVLLVDDSEELRKKIKEALESEGYTVVFAPDGIEALEKLKEFLPDLIIVDLEMPPMDGFTLLKILKNDEKLKNIPVIVLSRDKSPEVEKKCLELGANKYIPKPFNLEELIEVVKELLE
1053	MKSVLLVDDSEELREEISRALESEGLTVTWAPDGVAALEKLEEFLPDLIILDLRMPPMDGFEVLRILKNDEELRKIPVVVLSADTDPEVRERALELGADAYVPKPFDLEELMEIVRELLN
1054	MKSVLLVDDSEELRERISAALRAEGYTVVFAPNGVEALEKLKEFLPDLIICDLDMPPMNGFELLKILKEDEKLKEIPVIVLSSNTNPEVEKKCLELGADAYVPKPFDLEELMAIAREMLE
1055	MKKVLLVDDSEELRKEISKALESRGYKVVFAKDGIEALEKLKEFKPDLIILDLEMPKMNGFEVLKILKEDEELKKIPVIVLSSNKNPEVKERALKAGANAYIPKPFDLEELMEVVEKLLN
1056	SKTVLLVDDSEELRERISAALRSRGLSVVFAPDGIAALEKLKEFLPDLIIVDLDMPPMDGLTLLKILKENEELKKIPVIVLSADTSPEVEEKCLEAGADAYVPKPFDLDELMAIAEELLN
1057	MKKVLVVDDSEELRERIAKALEAEGLSVIWARDGVEALEKLKKETPDLIIVDLEMPKMDGLELLKILKNDEKLKKVPVVVLSANADPEVEKEALEAGADAYVPKPFDLDELMAVVRELLE
1058	MKSVLVVDDSEALRERITAALRARGYTVVWAPNGVEALEKLKEFLPDLIILDLRMPPMNGLEVLEILKNDPELKKIPVIVLSADTSPEVKERALEAGADAYVPKPFDLDELMAVAERLLT
1059	MKSVLVVDDSEELRERITAALRSRGYSVTWAKDGIEALKKLEEFLPDLIIVDLRMPPMDGLTLLKILKEDEKLKKIPVIVLSADTTPEIEKKCLEAGADKYVPKPFDLDELMAVVDELLN
1060	MKSILLVDDSEEERERIAKALESEGYTVVFAPDGIEALEKLKEFLPDLIIVDLDMPPMNGFELLEILKNDEKLREIPVVVISADSDPEVRKRCLEAGADAYVPKPFDLDELIEIVKKLLE
1061	MKSVLLVDDSEELRKKISEALESEGYTVTYARDGIEALEKLKKFTPDLIIVDLRMPPMDGLTLLKILKNDPKLRKIPVIVLSGDTSPEMKEKALKAGANAYVPKPFDLEELMEIAKKLLN
1062	MKTVLLVDDSEELQKKIKEALESEGYKVIYAPDGVSALEKLEQFLPDLIICDLRMPPMDGFELLKRLAEDPKLRNIPVIVLSSDTSPEVRQRCLEAGANAYIPKPFDLEELIEVAKKLLN
1063	MKSVLLVDDSEELRREISKALESEGYTVVFAPDGKEALEKLKEFLPDLIIVDLDMPPMNGFELLKKLKNDEELKKIPVIVLSSDTSPEVKEECLKAGANAYIPKPFDLEELMEVARKLLN
1064	MKKVLLVDDSEELQEKITAALEAEGYSVIKAPDGIEALEKLEKELPDLIIVDLRMPPMDGFELLKKLKEDEKLREIPVIVLSADTDPEVRERALEAGADAYIPKPFDLEELMAVARELLE
1065	MKSVLVVDDSEELRKKITEALESRGYTVVWAPNGVEALKKLEEFLPDLIIVDLDMPPMDGFELLRILANDPKLRKVPVVVLSRDTSPEVRERCLELGADRYVPKPFDLEELMAVVDELLN
1066	MKTVLLVDDSEELREKISKALKSEGWEVIFAPDGVAALEKLEKQLPDLIIVDLRMPPMDGFELLKRLKEDPELREIPVIVLSADTSPEVEKRALEGGADAYIPKPFDLDELIEVAKKLLE
1067	MKSVLLVDDSEELREEISKALRSEGLTVTFARDGVEALEKLKEFRPDLIIVDLRMPPMDGLELLRRLAEDPELREVPVVVLSADTDPEVRQRCLEAGADAYIPKPFDLEELMAVVRELLN
1068	MKKVLLVDDSEELREKISKALESEGWSVVYAKDGKEALEKLKKFLPDLIIVDLNMPEMNGFELLKILKEDEELKKIPVIVLSADTSEEVKEEALKAGADYYVPKPFDLEELIKIAKELLN
1069	MKSVLLVDDSEELRKKISEALESEGYTVVWAPNGIEALKKLEKFLPDLIIVDLRMPPMNGYELLKRLKNDEKLKKIPVIVLSRDTSPEVEKRALELGANAYIPKPFDLNELMEVAKKLLN
1070	MKKVLVVDDSEELRKKITEAIESRGYTVILAPDGIAALEKLKEFLPDLIIVDLDMPPMNGLELLKILKEDEKLKKIPVVVISRDTSPEVEKECLEAGANAYIPKPFDLEELMKVIEKLLN
1071	MKSILLVDDSEELREEIKKALESRGYSVVLAPNGVEALEKLKEFLPDLIILDLDMPPMDGFELLKILKENEKLKNIPVVVISRDTSPEVKEECLKLGANKYVPKPFDLEELMKVVDELLN
1072	MKSVLLVDDSEELQERISAALEAEGLKVVRAPNGIEALKKLEEFLPDLIILDLRMPPMNGFEVLKILKNDEKLKKIPVVVISRRTDPEVKERCLEAGANAYVPKPFDLEELMAIVKKLLE
1073	MKSILLVDDSEELRKKISEALKSEGYTVIWAKDGKEALKKLEKFTPDLIILDLRMPEMDGFEVLKILKNDEKLKKIPVIVLSANKDPEVEKRCLELGANKYIPKPFDLEELMKVVKELLN
1074	MKKILLVDDSEELRKKIAEALEKEGYSVVFARNGKEALEKLEEFLPDLIIVDLRMPDMDGFELLKILKEDEKLKKIPVVVISADTDPEVEKKALELGANAYIPKPFDLDELMAVVKKLLN
1075	MKSVLLVDDSEELRKEISEALEKEGLTVTLAPDGVEALEKLKEFLPDLIILDLEMPKMDGFEVLKILKEDEKLKKIPVLVLSRDTSPEVEKKCLEAGADAYVPKPFDLEELMEIVKKLLN
1076	MKTILLVDDSEELREEIAKALESRGYKVIFARNGIEALEKLKKFLPDLIILDLRMPPMDGFTLLKILKEDEKLKNIPVIVLSGDKDPEVKKKCLEAGANYYVPKPFDLDELMEVVEKLLN
1077	MKSVLLVDDSEELRKEISAALESRGYTVTWAPDGIAALEKLKEFLPDLIIVDLEMPEMDGFELLKILKNNEKLKKIPVIVLSSNEDPEVEKEALELGADKYVPKPFDLEELMEIADELLN
1078	MKSVLLVDDSEELRKKISEALESEGYSVVWARNGVEALEKLEKQLPDLIIVDLDMPPMNGFELLKTLKEDEKLREIPVVVLSSRTDPEVKERALEAGADAYVPKPFDLEELIRIVKELLE
1079	MKSVLLVDDSEELAKEISAALESEGYTVTLAPDGIAALKKLEEFLPDLIIVDLDMPPMDGFTLLEKLKNDEKLKNIPVIVLSRDTSPEVKEKALKLGANKYIPKPFDLEELMKVARKLLN
1080	MKKVLLVDDSEEERKKIAEALEKEGYSVVFARNGKEALEKLKEFLPDLIIVDLDMPEMNGLELLKILKEDEELKKIPVIVISKNTDPEIEEKCLELGANAYIPKPFDLEELMKVVKKLLE
1081	MKSVLLVDDSEELRKKISAALESRGYTVIWAPDGIEALEKLKEQLPDLIILDLRMPPMNGFELLKILKNNPELKKIPVIVLSRNTSPEVRKRALEAGADAYIPKPFDLDELMAVAEELLN
1082	MKSVLLVDDSEELREKISKALKSEGYTVIFAPDGVAALEKLKKELPDLIIVDLRMPPMDGFELLRVLKNDPKLRDIPVIVLSGDSSPEVRERALELGADKYVVKPFDLEELMKIAKELLN
1083	MKSVLLVDDSEELREEISKALESRGYTVTFAPNGIEALEKLEKFLPDLIILDLRMPPMDGFEVLKRLKNNPELRNIPVVVISGDTSPEVKERALEAGANAYIPKPFDLEELMEVVEKLLN
1084	MKSVLVVDDSEELRELITKALESRGYTVVRAPNGVEALEKLKKFLPDLIIVDLRMPPMNGLELLKILKNDEKLKEIPVLVLSADTSPEVEEKALELGANAYVPKPFDLEELMKIVEKLLN
1085	MKSVLVVDDSEELRERITAALEARGYTTIWAPDGVAALEKLEKSLPDLIIVDLEMPEMDGLELLRRLREDPELRGIPVIVLSRDTSPEVERECLEAGADAYVPKPFDLDELMAVAERLLT
1086	MKSILLVDDSEEERKRIAEALRSRGYTVVLARDGVEALKKLEEFLPDLIIVDLRMPPMDGWELLRRLAEDPELRKVPVVVLSADTSPEVRERALAAGADAYVPKPYDLEELMAVVERLLN
1087	MKSVLLVDDSEELRKKIAEALESEGYTVTFARDGVEALEKLKEFLPDLIIVDLEMPEMDGFTLLEILKNDEKLKKIPVVVISKNTDPEVKERCLKAGANAYIPKPFDLEELIEVVKKLLN
1088	MKSVLVVDDSEELRKRITEALESEGYTVTWAPDGVEALKKLEESLPDLIILDLRMPPMDGLEVLKILKNNPELKKIPVIVLSADTSPEIEKKCLEAGANAYIPKPFDLEELMKVAKKLLN
1089	MKRVLLVDDSEELRERIAAALRAEGLSVVFAPDGVEALEKLKEFLPDLIIVDLRMPKMNGFELLKKLKEDEKLKEIPVLVLSANTSPEVEKEALEAGADAYVPKPFDLEELLAIVRELLE
1090	MKKVLLVDDSEELRERISKALESEGLKVVFAPDGIEALEKLKEFKPDLIIVDLDMPPMNGYELLKILKNDEELKKIPVVVLSANTSPEVEKKALELGANAYIPKPFDLEELMEVVKKLLE
1091	MKSILLVDDSEELRQRIAEALEARGYTVVFAPDGVEALKKLEEFLPDLIIVDLRMPPMDGLELLKKLKEDEKLKEIPVVVLSADTDPEVEKEALEAGADAYVPKPFDLEELMAVVEELLN
1092	MKSVLVVDDSEELRKKITEAIESEGYSVVWAPDGVEALEKLKEFLPDLIIVDLRMPKMDGFELLRILKEDEKLKNIPVIVLSSDTSPEVRERCLEAGANKYIPKPFDLEELMKVIKELLN
1093	MKSVLVVDDSEELRKKITEALESKGYTVTWARNGVEALEKLKKFLPDLIICDLDMPPMNGLELLKILKNDEKLKKIPVIVLSRDTDPEVKKRCLEAGANYYVPKPFDLDELMKIAEKLLN
1094	MKTVLLVDDSEELRKKIAEALESRGYTVIFAPDGLEALRKLEEQLPDLIIVDLRMPEMDGLALLRVLREDPELREIPVVVLSADTDPAVERRCLEAGADAYIPKPFDLDELMEVVEELLN
1095	MKKVLLVDDSEELQKRIKEALESRGYSVILAPDGISALEKLKEFLPDLIIVDLRMPPMDGFELLKILKEDEELRNIPVLVLSADTSPEVKEKALKAGANAYIPKPFDLEELMAVVEKLLN
1096	MKSVLLVDDSEELRRRISEALESEGYTVTWAPDGIAALEKLKEFLPDLIILDLEMPPMDGYTVLEILKNDPELKKIPVIVISRDTSPEVRKRCLELGANAYVPKPFDLEELIEVAKKLLN
1097	MKSVLLVDDSEELRERISAALRAEGLTVRFARDGVEALEKLKEFLPDLIILDLEMPEMDGFELLRILKEDEELRNIPVIVLSRRTDPEVEEEALELGADAYVPKPFDLDELMAIARELLN
1098	MKTILLVDDSEELRKEISKALESEGYKVIFAPNGVEALEKLKEFKPDLIIVDLRMPPMDGFELLKILKNDEELKNIPVIVLSGNKDPEIEEKALELGANKYIPKPFDLNELIEVVKKLLN
1099	MKSILLVDDSEELRKKISKALESRGYSVIFAPDGVEALKKLKEFLPDLIIVDLKMPPMDGFELLKILKEDEELKKIPVIVLSRDSSPEVKERCLELGANAYVPKPFDLEELMEIVEKLLN
1100	MKSILLVDDSEELRERIAAALRAEGYTVVFARNGIEALEKLEKFLPDLIIVDLRMPPMDGFELLERLKNDEKLRKVPVVVLSRDTSPEVRRRCLEAGADAYVPKPFDLEELMAIVRELLN
1101	MKSVLVVDDSEELRARITAALEARGYTVVLAPDGISALEKLKEFLPDLIILDLRMPPMNGFELLKILKEDEKLKEIPVIVLSSDTSPEVKEECLKLGADAYVPKPFDLDELMAIVERLLN
1102	MKSVLLVDDSEELRERIAAALRAEGYTVVLARDGIEALEKLKEFLPDLIILDLRMPPMDGFELLKILKNDEKLKNIPVVVLSRDTSPEVEKRCLEAGANAYVPKPFDLEELMAVVRRLLS
1103	MKSVLLVDDSEELREEIAAALEARGYTVVWAPDGVAALEKLRERLPDLIIVDLRMPEMDGLTLLRILREDPELREVPVLVLSRDTSPEVRRRCLEAGADAYVPKPFDLDELMAVAERLLN
1104	MKTVLLVDDSEEEREKISKALESEGYKVIWAPDGVEALEKLEKQLPDLIIVDLRMPKMDGFELLRILKNNPELRDIPVVVLSADTSPEVEERALEAGADYYVPKPFDLEELIEIVKKLLN
1105	MKSVLVVDDSEELREKITEALESEGYKTIWAKNGIEALEKLKKQKPDLIIVDLRMPPMDGFELLKILKNDPELKEIPVIVLSGDTSEEVKKKCLEAGANAYVPKPFDLEELMKIVKELLE
1106	MKSVLLVDDSEELRERIAAALEAEGYTVTFAPNGKEALEKLKKFTPDLIIVDLRMPEMNGLELLKTLKNDEKLKEIPVVVLSGRTDPEVERECLEAGADRYVPKPFDLDELMAVVRELLE
1107	MKSVLLVDDSEELRKEISEALEAEGYSVIWAPDGVAALEALAEQLPDLIIVDLRMPPMDGLELLRRLAADPALRGVPVLVLSADTDPEVRERALAAGADAYVPKPFDLEELMEVVRELLE
1108	MKSILLVDDSEELRKEIAKALESEGYSVVFAPDGVEALKKLEKFLPDLIIVDLDMPPMNGFELLEKLKNDEKLKNIPVIVLSKDTSPEVKKRCLEAGADAYIPKPFDLEELMEVVKKLLN
1109	MKKVLLVDDSEELRKEIAAALESRGYTVVLAPDGIEALKKLEEFLPDLIIVDLDMPPMDGLELLKILKEDEKLKKIPVIVLSSDTSPEVKKKCLEAGADAYIPKPFDLEELMAVAEKLLN
1110	MKSVLLVDDSEELREEIKKALEKEGYKVVLARDGKEALEKLKEFLPDLIIVDLDMPEMDGLTLLKILKNDEKLKKIPVIVLSADTDPEIRERCLKLGANKYIPKPFDLEELIEVVKKLLE
1111	MKSVLLVDDSEELRKKISEALKSEGYTVVYAPNGIEALEKLKKFLPDLIIVDLRMPPMDGFTLLKILKENEKLRKIPVIVISGDKSPEVEKECLELGADKYVPKPFDLEELMKIVKELLE
1112	MKSVLLVDDSEELRKKIKEALESRGYTVVEAPDGKEALEKLKKFLPDLIICDLRMPEMNGFELLKTLKEDEKLKEIPVIVISADTNPEVEEECLKLGADKYVPKPFDLDELMAVAEELLN
1113	MKTVLVVDDSEELRKKISEALESEGYKVIFAPDGIEALEKLKEFLPDLIIVDLKMPKMNGFELLKILKEDEKLKKIPVIVLSADTDPEVEERCLKAGANAYVPKPFDLKELIEIAKKLLN
1114	MKSVLLVDDSEELRKLISKALESRGYKVVWARDGIEALEKLKEFLPDLIILDLRMPKMNGFEVLKILKNDEKLKEIPVIVLSKNTDPEVEKRCLELGANKYVPKPFDLEELMEIAEELLN
1115	MKKILLVDDSEELREEIEKALRSRGYSVIRARNGIEALEKLKEFLPDLIIVDLEMPPMDGLTLLKILAEDEELKNIPVVVLSSNTDPEVEKRCLEAGANAYVPKPFDLDELMKIVEELLN
1116	MKKILLVDDSEELRKKISEALKKEGYSVVFAPDGKEALEKLKKFTPDLIIVDLEMPEMNGEELLKILKNDEKLKNIPVIVLSRDTSPEVKKRCLELGANKYIPKPFDLEELIEEIKKLLN
1117	MKTILVVDDSEELRKKITEALESEGYKVIWAKNGIEALKKLEKFTPDLIIVDLEMPPMNGFELLKKLKEDEKLKEIPVIVLSKDTSPEVEKKALELGANKYVPKPFDLEELMEVVKELLE
1118	MKSVLLVDDSEELAAEISAALEAEGLTVTLAPDGVEALRKLEEFLPDLIIVDLRMPPMDGFELLRVLKEDEKLREIPVVVLSADTSPEVRERCLAAGADAYIPKPFDLEELMAVVKELLE
1119	MKSVLLVDDSEELRKRISEALKSRGYTVTWARNGIEALEKLEKELPDLIIVDLEMPPMNGFELLEKLKNDEELKNIPVVVLSANTDPEVEKRALELGADKYIPKPFDLEELMAVVEELLN
1120	MKSILLVDDSEELRKKISEALESRGYTVTLAPDGIAALEELEKKTPDLIIVDLDMPPMDGLELLKILKNNEKLKNIPVIVLSANTDPEVREKALKAGANAYVPKPFDLEELMEIVEKLLN
1121	MKTVLLVDDSEELRELISEALRSRGYTVVWAPDGIAALKELEKQLPDLIIVDLEMPPMDGFELLKKLKEDPKLKEIPVVVLSSDTSPEVEKRCLELGANAYIPKPFDLEELMAVVEELLN
1122	MKTVLLVDDSEELRKEITKALESKGYKVIWAPNGKEALEKLKKFLPDLIIVDLRMPEMDGFELLKILKENEELKKIPVIVLSSDKDEEVKEKCLELGANKYIPKPFDLEELIKVAEELLN
1123	MKSILLVDDSEELRKLISKALESEGYKVIFAKNGIEALEKLKEFLPDLIIVDLRMPPMDGFTLLEILKNDEKLKKIPVIVLSSDKSPEVRERALKAGANAYIPKPFNLEELIEVIKKLLN
1124	MKRVLLVDDSEELRRRIAAALEAEGLEVVWAPDGVAALEKLEEFRPDLIIVDLRMPPMDGLELLRRLASDPELRGIPVVVLSADTSPEVRERALEAGADAYVPKPFDLAELLAVVRELLE
1125	MKSVLVVDDSEEERKEITKALESRGYKVIWARDGIEALEKLKKELPDLIIVDLKMPPMDGFELLKILKENEELKKIPVLVISADTSPEVKEEALKLGANAYVPKPYDLEELMEIVEKLLN
1126	MKSILLVDDSEELRKEISEALESRGYTVTFARDGIEALKKLEEFLPDLIIVDLRMPKMDGYTLLKILKNNEKLKKIPVIVLSGDTSEEVKERCLKLGANKYVPKPFDLEELMEIVEELLN
1127	MKTVLVVDDSEELRKEITKALESEGYTVVWARDGVEALRKLEEFLPDLIIVDLRMPEMDGFELLRRLKEDPELRKIPVIVLSSDTDPEVEERCLEAGADKYVPKPFDLDELMKVAKELLN
1128	MKSILLVDDSEELRKRIAEALESRGYTVVFAPDGVEALEKLKEFLPDLIIVDLRMPPMNGFELLKILKEDEKLREIPVIVLSADTSPEVKKRALEAGADKYVPKPFDLEELMEVVEELLN
1129	MKKVLLVDDSEEEREKIAKALESRGYKVVFAPNGIEALEKLKEFLPDLIIVDLRMPEMDGFELLKILKNDEKLKKIPVIVLSRDTSPEVKKECLELGANAYIPKPYDLEELMEVVEKMLN
1130	MKSVLLIDDSEEEREEISKAIESEGYTVRWAPDGIEALKKLKEFLPDLIILDLRMPPMNGFEVLKILKEDEELRKIPVIVLSRNTDPEVEEECLKAGANYYVPKPYDLDELMEIIKKLLN
1131	MKSILLVDDSEELREEIAKALEAEGYTVIFAPNGKEALEKLKKTLPDLIILDLDMPEMDGLELLKILKEDPELKEVPVVVLSADTSPEVRERALEAGADRYVPKPFDLEELMAVVRELLE
1132	MKSILLVDDSEELQERISRALESEGYTVTLAPDGKAALEKLKKFLPDLIILDLRMPEMDGFTLLKILKNDEKLKNIPVIVLSADKDPEVKERCLKGGANKYVPKPFDLEELMKIVKELLN
1133	MKSILVVDDSEELRKKITEALEKEGYKVVYAPDGKEALEKLKEFLPDLIIVDLRMPEMDGYELLKKLKNDEKLKNIPVVVISSDTSPEVKERCLELGANKYIPKPFDLEELIKVIKELLN
1134	MKRVLLVDDSEELRERIAAALRAEGYEVVFARDGVEALKKLEEFLPDLIIVDLRMPPMDGWELLRRLAEDPELRGVPVVVLSGDTDPAVRERALAAGADAYVPKPFDLAELLAVVRRLLE
1135	MKSILLVDDSEELRKKISKAIESEGYTVVWAPDGVAALEKLKKQLPDLIIVDLDMPKMNGFELLKILKNDPELKKIPVIVLSRDTSPEVKEKALKAGANAYVPKPFDLEELMKIIKKLLN
1136	MKSVLLVDDSEELRERIAAALESRGYKVVFAPDGISALKKLEEFLPDLIICDLRMPPMNGFELLKKLKEDEKLKKIPVIVLSRDTSPEVEKKALELGADKYVPKPFDLEELMAEAEKLLN
1137	MKSVLVVDDSEELRERITAALEAEGYTVRWAPDGVAALKELEKFLPDLIILDLRMPPMDGLEVLRILKENEELRKIPVVVLSRNTDPEVERECLEAGADRYVPKPFDLEELMAVVRELLN
1138	MKSVLLVDDSEELRKRIKEALESKGYTVTLARDGKEALEKLEKSLPDLIILDLRMPEMDGFELLKILKNNEKLKKIPVLVISADTDPEVEKKALELGANAYVPKPFDLDELMEIIEKLLN
1139	MKSVLLVDDSEELRRRIAAALESRGYTVTLAPDGVEALRVLEQRLPDLIILDLEMPPMDGFELLRRLKEDPELRRVPVIVLSADTSPEVKRRALEAGADAYVPKPFDLEELVAVAEELLS
1140	MKSVLLVDDSEELQERITAALESRGYTVVRAPNGIAALEKLKEFLPDLIILDLRMPPMDGFTLLKILKNDPELKKIPVIVLSADTDPEVEKEALEAGADYYVPKPFDLEELMAVVEKLLN
1141	MKSILLVDDSEEERKRISEALESKGYTVTYAEDGIEALKKLKEFLPDLIIVDLRMPKMDGYELLKILKNNEELKKIPVIVISGDTSEEVKEKCLKLGANYYVPKPFDLDELMAVVEKLLS
1142	MKSVLLVDDSEELRKEISEALKSRGYTVTYAPDGIEALEKLKEFLPDLIIIDLRMPKMNGFELLKILKNDEKLKKIPVIVLSGNKSPEVEKKCLEAGANKYIPKPFDLEELMEVVEELLN
1143	MKSVLLVDDSEELRKEISKALEAEGYTVVFAKNGIEALEKLKKFLPDLIIVDLEMPPMNGFELLKILKEDEKLKNIPVVVLSANTDPEVEKKALELGANAYIPKPFDLKELIEVVKKLLN
1144	MKTILLVDDSEELRKKIKEALESRGYKVIEAPDGIAALEKLKKQLPDLIILDLEMPEMDGFEVLKILKEDPKLKKIPVIVLSRDKSPEVEKEALELGADAYIPKPFDLEELMKVVEKLLN
1145	MKSILVVDDSEELRKKITEALESEGYTVTWAKNGKEALEKLKEFLPDLIIVDLRMPDMDGFTLLKILKNDEKLKNIPVIVISRRKDPEVEKECLELGANKYIPKPFDLEELMKVVKKLLN
1146	MKTVLLVDDSEELRDRIEAALRARGYTVIRAPDGVAALEKLKEQLPDLIIVDLRMPPMDGLTLLRVLRNDPALRDIPVVVLSADTDPEVERECLEAGADAYVPKPFDLEELMAVVEELLE
1147	MKSVLLVDDSEEERKEISKALESRGYTVVEARDGVEALEKLKEFLPDLIICDLEMPKMDGLELLKILKNDEELKKIPVIVLSRDTSPEVEEKCLKAGANKYIPKPYDLEELMEVAEELLN
1148	MKKVLVVDDSEELRERITAALEARGYETVWAPDGIEALEKLKEFLPDLIIVDLRMPKMDGYELLKILKEDEKLRKIPVVVLSADKDPEVEERCLKLGADKYVPKPFDLDELMAVVEELLN
1149	MKSILLVDDSEELRERIKKALESKGYTVIEAKNGIEALEKLKEFLPDLIILDLKMKPMNGLEVLKILKEDEKLKNIPVIVLSRDTDPEIEKKCLELGADKYVPKPFDLEELMEVVEEMLN
1150	MKTVLVVDDSEELREEIAAALEAEGLKVIFAPNGVEALEKLKEFLPDLIIVDLDMPPMNGLELLKILKEDEELKKIPVIVLSARKDPEVEKEALEAGADAYVPKPFDLDELMAVVRKLLN
1151	MKTVLVVDDSEELRKLITKALESEGYKVIWAPDGKEALEKLKEFLPDLIIVDLKMPEMDGFTLLKILKENEELKNIPVIVISGDKDPEVKEKALELGANAYIPKPFDLEELMKVVKKLLE
1152	MKTILLVDDSEEERKKISEALEKEGYKVIFAPNGIEALEKLKEFLPDLIIVDLRMPPMDGFELLKILKNDPKLKKIPVVVLSSDKTPEVEEECLKLGANKYIPKPYDLEELMEVIKKLLN
1153	MKSVLLVDDSEALRERIAAALEARGYSVVRARDGVEALEKLREFRPDLIILDLDMPPMDGLELLRVLAEDPELRGVPVVVLSADTDPEVEERALAAGADAYVPKPFDLEELMAIVERLLG
1154	MKSVLLVDDSEELQKKISEALEKEGYKVTWAPDGKSALEKLKKFLPDLIIVDLKMPPMDGFTLLKILKNDEKLKNIPVVVISGNTDPEVKKKCLEAGANKYVPKPFDLEELMEIVKELLE
1155	MKSVLLVDDSEELRERISAALRSRGYTVVWARDGKEALEKLKKQLPDLIIVDLRMPEMDGFTLLKILKNDEELKKVPVIVLSRNTDPEVEERALKAGADAYVPKPFDLDELMAIAEELLN
1156	MKTVLLVDDSEELRERIAAALRARGYTVVLAPDGLEALRVLEEQRPDLIIVDLDMPPMDGLELLRVLREDPELRNIPVVVLSRDTSPEVRRRCLEAGADAYVPKPFDLEELMAVVERLLN
1157	MKSVLLVDDSEELQEEIEKALRSEGLKVIRARNGVEALKKLEEFLPDLIIVDLDMPPMNGLELLKKLKEDPELKKIPVVVLSGNTSPEVEKECLEAGADAYVPKPFDLDELMEIVKALLS
1158	MKRVLLVDDSEEERAEIAAALEARGYSVVLAPDGVAALEKLREFRPDLIIVDLEMPPMDGLELLRRLREDPELREVPVIVLSARTDPAVREECLAAGADAYVPKPYDLDELMAIVEELLE
1159	MKSVLVVDDSEELRERITRALEAEGYTVRLAPDGVAALEALEEFLPDLIIVDLEMPPMDGFELLRRLREDPELREVPVVVLSRDTTPEVRQRALELGADRYVPKPFDLEELLAVVRELLE
1160	MKSVLLVDDSEELQERIAAALESRGYTVVRAPDGIAALEKLKEFLPDLIIVDLRMPPMDGFELLKILKEDEELKKIPVIVLSADTSPEVEKECLELGANAYVPKPFDLEELMAIAEELLN
[truncated: 3,840 more rows]
