# Supplementary material for: Energetic Frustration Dictates Cognate Specificity of Two-Component Signaling System
Source: Research Square preprint supplement (doi:10.21203/rs.3.rs-7586528/v1), 2025-10-31
Supplement: Supplementary file 2 [file bc53a1494b2cfdd1a14efc86.xlsx]

## Sheet: Sheet1
Sequence identifier	Sequence of HK-RR
>Acear_0856_HK_Classic|Acetohalobium_arabaticum_DSM_5501|Pair_Acear_0855|HisKA_368-433/Acear_0855_RR_OmpR|Acetohalobium_arabaticum_DSM_5501|Pair_Acear_0856|Response_reg_6-118	-RTEFVSNVSHELRTPLTSIKGYVETLLDEPGVRERFLQVIKDETDRLERLITDLLNLSQLES-ILVVDDEENIVELVKFNLEKEGY-QVFVTYDGQAALDKLQEEDIDLLVLDLMLPEIGGLDICRQIRNDDSDLPIIMLTAKEKEVDRILGLELGADDYVTKPFSPRELVARVK
>Acear_1914_HK_Classic|Acetohalobium_arabaticum_DSM_5501|Pair_Acear_1915|HisKA_248-315/Acear_1915_RR_OmpR|Acetohalobium_arabaticum_DSM_5501|Pair_Acear_1914|Response_reg_6-113	-QKQFVSDASHELRTPISVIQGYIDLLDRDKEVLEEAIEAIQAETTSMKKLLEQLLFLARSDKGVLIIEDEEKIARFLELELEHEGY-EVEAVYNGEEGLEAIIEGDFDLVLLDIMLPGLSGMEICRRVRKES-EIPIIMLTAKDDTTDKVMGLDLGAHDYITKPFAIEELLARM-
>CHY_0091_HK_Classic|Carboxydothermus_hydrogenoformans_Z-2901|Pair_CHY_0092|HisKA_258-322/CHY_0092_RR_OmpR|Carboxydothermus_hydrogenoformans_Z-2901|Pair_CHY_0091|Response_reg_4-113	-RKELIANISHDLKTPITAIKGYVEGIRDSPEKLSRYVDTIYRKILEVDGLIDELFLFSKLD--VLIIEDDRSIAELERDYLEVAGF-LVEIAVNGDQGLKKALEEEYDLILLDLMLPGIDGFEVLRKVRAEK-DTPVLLVSARREDIDKIRGLGLGADDYITKPFSPSELVARVK
>CHY_0605_HK_Classic|Carboxydothermus_hydrogenoformans_Z-2901|Pair_CHY_0606|HisKA_309-375/CHY_0606_RR_OmpR|Carboxydothermus_hydrogenoformans_Z-2901|Pair_CHY_0605|Response_reg_4-113	-KSEIIAMVSHELKTPLTSILAFGEILLALLPWQKEYLEDIMESGQELLKQIETLLTMAKIEAGILVVEDDQKIQKALAHLLKAENY-DFVQAYDGEAAVEHFYRENFDLVILDLNLPKQDGFSVLKEIKNRE-DVPVIILTARGEEMDKITGFTLGVDDYLTKPFSPAELMLRI-
>CHY_1124_HK_Classic|Carboxydothermus_hydrogenoformans_Z-2901|Pair_CHY_1125|HisKA_239-293/CHY_1125_RR_IclR|Carboxydothermus_hydrogenoformans_Z-2901|Pair_CHY_1124|Response_reg_3-113	-----LHSLVHDLKTPLMTIQGLSSLIGLDSPKLQEYVQKIEQAVENVNKMISEIL--------VLIIDDDEGIRYTVGEIIAFMGW-EAIKAENGAIGIEKFVREKPDMVLVDYHMPALDGLDTVERIREIDQGVPIIVLTVDERQQIADKFLEVGASDFALKPIKAPDLIARL-
>CHY_1412_HK_Classic|Carboxydothermus_hydrogenoformans_Z-2901|Pair_CHY_1413|HisKA_255-321/CHY_1413_RR_OmpR|Carboxydothermus_hydrogenoformans_Z-2901|Pair_CHY_1412|Response_reg_4-113	-RREFLANVSHELRTPLTIIQGYTEALLDTDEKIREHLKNILQEAERLKAMANELLDLASIEEGILLVDDEEKIREVLRLYLEKEGF-LVLEAQDGKEALKRFSEHKIDLIILDLMLPEIDGMEIAKEIRKTS-LVPIIMLTARGEEIDKILGLEIGADDYVVKPFSPREVVARV-
>CHY_1856_HK_Classic|Carboxydothermus_hydrogenoformans_Z-2901|Pair_CHY_1855|HisKA_367-441/CHY_1855_RR_NtrC|Carboxydothermus_hydrogenoformans_Z-2901|Pair_CHY_1856|Response_reg_7-117	-LGLLAAGVAHEINNPLATVSAYAEDLLERSGELARYLQVIGKQIERCKKITGSLLNFARQPA-VLVVDDEENFRDLLIQRLTRKGY-EVKGAATGEEALQFLKEETFHLAIFDIKMPGIDGIELLQRARQLDENLQVIILTGHGTIESAIGAMKLGAYDYLTKPCNLAELE----
>CHY_2046_HK_Classic|Carboxydothermus_hydrogenoformans_Z-2901|Pair_CHY_2047|HisKA_218-284/CHY_2047_RR_OmpR|Carboxydothermus_hydrogenoformans_Z-2901|Pair_CHY_2046|Response_reg_3-115	MRSEFIANVSHELRTPLTSIKGFLETLLDDKTIAKHFLQIMNSETERLTRLIDDLLSLSKIEA-ILVVDDEAPIVELIKFNLEREGY-KVLEAYDGIRALEIVKKELPDLVILDIMLPGMSGLEVCKNIRNNEAEIPIIMLSARGEEVDKILGLELGADDYMVKPFSPRELVARVK
>CHY_2566_HK_Classic|Carboxydothermus_hydrogenoformans_Z-2901|Pair_CHY_2567|HisKA_228-291/CHY_2567_RR_OmpR|Carboxydothermus_hydrogenoformans_Z-2901|Pair_CHY_2566|Response_reg_5-114	-RRQMIADIAHELRTPLSILQGNFELLLEVIEADEETLRSLAEEVKRLSRLVEELRELSLAEAGILIVDDEPKIVTMVKSYLLKEGY-EVITAFNGREALNSFYKEKPDLIVLDWMMPEMSGIEVLREIRKKS-QIPIIMLTAKTEEVDKLIGFEFGVDDYVVKPFSLRELSARI-
>SMWW4_v1c04190_HK_Classic|Serratia_marcescens_WW4|Pair_SMWW4_v1c04200|HisKA_136-195/SMWW4_v1c04200_RR_OmpR|Serratia_marcescens_WW4|Pair_SMWW4_v1c04190|Response_reg_3-113	--RLFTADAAHELRTPLAGIRLHLELMEK---QGVKGSQALIARIDQLMHTVEQLLMLSRAG---LVVEDDELLQQGLALALTGEGY-VCDCAATAAEASSLLITSQYSMVILDLGLPDMDGAALLRQWRRQQIDLPVLILTARDALEDRVDGLDAGADDYLVKPFALVELQARV-
>SMWW4_v1c09070_HK_Classic|Serratia_marcescens_WW4|Pair_SMWW4_v1c09060|HisKA_178-235/SMWW4_v1c09060_RR_OmpR|Serratia_marcescens_WW4|Pair_SMWW4_v1c09070|Response_reg_3-102	--------MAHELRSPLTASIVRLQGIMDVFEPDKHQLNLVMQPLKSLNRLIDDLQMLSLSQAG---------VAEVLEAYLKRECF-TVAKVGDGVKGLEMAFSWQPDLILLDVMLPGISGNEILARVRRKS-DVPVIMVTAIGEIQDKISSLRHGVDDYIVKPYNPGEVVARV-
>SMWW4_v1c09980_HK_Classic|Serratia_marcescens_WW4|Pair_SMWW4_v1c09970|HisKA_203-268/SMWW4_v1c09970_RR_OmpR|Serratia_marcescens_WW4|Pair_SMWW4_v1c09980|Response_reg_5-117	ARRNFFANVSHELRTPLTVLQGYLEMMGDDGSLRSKALSTMQEQTRRMDGLVKQLLTLSRIEA-ILVVEDEAPIREMVCFVLEQNGY-QPLEAEDYDSAVTRLSEPFPDLVLLDWMLPGGSGIQFIKHMKREARDIPVMMLTARGEEEDRVRGLEVGADDYITKPFSPKELVARIK
>SMWW4_v1c12100_HK_Classic|Serratia_marcescens_WW4|Pair_SMWW4_v1c12090|HisKA_667-733/SMWW4_v1c12090_RR_OmpR|Serratia_marcescens_WW4|Pair_SMWW4_v1c12100|Response_reg_19-128	-RNSLLAALSHDLRTPLTVLFGQAEILLDEGSNHATQASQIRQQVLSTTRLVNNLLDMARIQSGILIVEDEKEIRRFVRTALESEGL-RVFESETLQRGLIEAGTRKPDLIILDLGLPDGDGLSYIRDLRQWS-AIPVIVLSARNAEEDKIAALDAGADDYLSKPFGIGELLARVR
>SMWW4_v1c14850_HK_Classic|Serratia_marcescens_WW4|Pair_SMWW4_v1c14840|HisKA_248-313/SMWW4_v1c14840_RR_OmpR|Serratia_marcescens_WW4|Pair_SMWW4_v1c14850|Response_reg_3-112	-LTQFSADLAHEIRTPVGALMGQCQVALYSVEEYETLLSNNMDELERISRMVENILFLARAGE-ILVVEDDIGTGDYLKKGLGEAGY-GVDLARTGTDGLFRALEQDYDAIVLDVMLPGLDGWQIIEVLRKKS-DVPILFLTARDGVQDRIHGLELGADDYLIKPFSFTELVLRL-
>SMWW4_v1c14860_HK_Classic|Serratia_marcescens_WW4|Pair_SMWW4_v1c14870|HisKA_267-334/SMWW4_v1c14870_RR_OmpR|Serratia_marcescens_WW4|Pair_SMWW4_v1c14860|Response_reg_9-119	-RREFIANVSHDLRTPLTSLHGYLETLKASDADRRRYLEIALAQSRKVGKLAQELFELARLEYGILIVEDDGDIADLLQLHLRDEGY-AISHAADGNQGMAMLEQGGWDALILDLMLPGVDGLEICRRARTMTRYTPIIITSARSSEVHRVLGLELGADDYLAKPFSMLELVARV-
>SMWW4_v1c20430_HK_Classic|Serratia_marcescens_WW4|Pair_SMWW4_v1c20440|HisKA_270-329/SMWW4_v1c20440_RR_OmpR|Serratia_marcescens_WW4|Pair_SMWW4_v1c20430|Response_reg_3-111	----TLSDLTHSLKTPLAVLQSTLRSLRSKQTTIEEAEPIMLDQIGRISQQIGYYLHRASINSGVLVVEDNGLLRHHLSVQMREMGH-QVDAAEDAKEADYFLQEHAPDIAIVDLGLPGEDGLSLIRRWRAHQTKLPILVLTARESWQDKVAVLEAGADDYVTKPFHLEEVIARM-
>SMWW4_v1c25740_HK_Classic|Serratia_marcescens_WW4|Pair_SMWW4_v1c25730|HisKA_211-269/SMWW4_v1c25730_RR_OmpR|Serratia_marcescens_WW4|Pair_SMWW4_v1c25740|Response_reg_7-113	SKKQLIDGIAHELRTPLVRLRYRLEMSDNLSESEQQ---ALNRDIGQLESLIDELLTYARLDR-IVFVEDDPEVGKLIAAYLGKHDI-EVLIEPRGDSAQARIEREQPDLVLLDIMLPGKDGMTLCRDLRPTF-PGPIVLLTSLDSDMNHILSLEMGANDYILKTTPPAVLLARL-
>SMWW4_v1c33620_HK_Classic|Serratia_marcescens_WW4|Pair_SMWW4_v1c33630|HisKA_353-414/SMWW4_v1c33630_RR_NarL|Serratia_marcescens_WW4|Pair_SMWW4_v1c33620|Response_reg_4-114	-LGEMASGFAHELNQPLAAIRHYAQGCLRAGHPLLTPLENIDRQAQRGGETIHNLRQ-------IHLVDDDVAVTDACHFLLTSLGH-DVQCWNDSTDFLAQADLFQTGIVLLDMRMPKLDGHQAYAELRRLGSTLAVVFLSGHGDVPMAVEQMKYGAVDFLQKPIAAEPLIAAL-
>SMWW4_v1c34540_HK_Classic|Serratia_marcescens_WW4|Pair_SMWW4_v1c34550|HisKA_247-311/SMWW4_v1c34550_RR_OmpR|Serratia_marcescens_WW4|Pair_SMWW4_v1c34540|Response_reg_3-113	-QERFSADASHQLRTPLAVLKTQVGVALARPQQWRESLQAMSATLDNTVALTDRLLYLSRLKA--LLVEDHPELSHWLQKALTGAGF-AVDVAPDGVAADHLLLNERYALAVLDVALPRLNGLDLLARLRKRGQDLPVLLLTARTDVADRVRGLNLGADDYLTKPFELDELEARIR
>SMWW4_v1c35620_HK_Classic|Serratia_marcescens_WW4|Pair_SMWW4_v1c35630|HisKA_211-273/SMWW4_v1c35630_RR_OmpR|Serratia_marcescens_WW4|Pair_SMWW4_v1c35620|Response_reg_3-112	-REQLLHDVSHELRSPLARLQLAIGLARQNAGNVETSLKRIEHESGRLDKMIGELLALSRTEH-ILLVDDDLELGTMLSEYLTGEGF-DATLVLTGKAGVEGALSGDYTAMILDIMLPDMSGIDVLRDVRKKS-RLPIIMLTAKGDNIDRVIGLEMGADDYMPKPCYPRELVARL-
>SMWW4_v1c36660_HK_Classic|Serratia_marcescens_WW4|Pair_SMWW4_v1c36670|HisKA_234-298/SMWW4_v1c36670_RR_OmpR|Serratia_marcescens_WW4|Pair_SMWW4_v1c36660|Response_reg_10-119	MRRAFMADVSHELRTPLAVLRGELEALQDVRQPTPASLSSLQAEVSTLTKLVDDLHQLSLSD--IMIVEDEPKLGQLLVDYLQAAGY-ATRWLTNGNEVVPTVHQHPPALILLDLMLPGADGLTVCRELRRFS-DVPIVMVTAKIEEIDRLLGLEIGADDYICKPYSPREVVARV-
>SMWW4_v1c40230_HK_Classic|Serratia_marcescens_WW4|Pair_SMWW4_v1c40220|HisKA_243-306/SMWW4_v1c40220_RR_OmpR|Serratia_marcescens_WW4|Pair_SMWW4_v1c40230|Response_reg_3-113	--KRFMADAAHELRTPIAAVLAQLHLLTQEQQERREIIGDMQQGLDRAASLSRQLINLAKLEA-ILLVEDDLQLGKALCRALELAGF-NLCWVRLLVDAENKLSSGGFDLMLLDLTLPDGDGLQRLIAWRAAGQNIPIIILTARDRIESLVNSLDSGADDFLAKPFALPELISRV-
>SMWW4_v1c40980_HK_Classic|Serratia_marcescens_WW4|Pair_SMWW4_v1c40990|HisKA_241-304/SMWW4_v1c40990_RR_OmpR|Serratia_marcescens_WW4|Pair_SMWW4_v1c40980|Response_reg_3-113	--RRFTSDAAHELRSPLAALRVQTEVVQLDAPMREHALDNLTLGIDRATRLVDQLLTLSRLDS-ILLIEDDKLIGDGIKAGLTKLGF-NLDWFTDGAVGKNALDSAPYDAVILDLSLPGLDGLDLLREWRQAGQDVPVLILTARDALEQRVSGLQSGADDYLCKPFALAEVAARL-
>SMWW4_v1c45740_HK_Classic|Serratia_marcescens_WW4|Pair_SMWW4_v1c45750|HisKA_234-293/SMWW4_v1c45750_RR_OmpR|Serratia_marcescens_WW4|Pair_SMWW4_v1c45740|Response_reg_7-117	--TLLMAGVSHDLRTPLTRIRLATEMMSA---EDGYLAESINKDIEECNAIIEQFIDYLR----ILVVDDDMRLRALLERYLTEQGF-QVRSVANAEQMDRLLTRESFHLMVLDLMLPGEDGLSICRRLRSQSNPMPIIMVTAKGEEVDRIVGLEIGADDYIPKPFNPRELLARIR
>SMWW4_v1c47420_HK_Classic|Serratia_marcescens_WW4|Pair_SMWW4_v1c47410|HisKA_238-299/SMWW4_v1c47410_RR_OmpR|Serratia_marcescens_WW4|Pair_SMWW4_v1c47420|Response_reg_4-112	-QQRLISDISHELRTPLTRLQLATALMRR-RHGEGHELARIETEAQRLDSMINDLLALSRGQ--ILLVDDDRELTSLLKELLEMEGF-NIVVAHDGEQALSLLDSS-VDLLLLDIMMPKKNGIDTLKELRQHH-QTPVIMLTARGSELDRVLGLELGADDYLPKPFNDRELVARIR
>SMWW4_v1c47990_HK_Classic|Serratia_marcescens_WW4|Pair_SMWW4_v1c48000|HisKA_131-186/SMWW4_v1c48000_RR_NtrC|Serratia_marcescens_WW4|Pair_SMWW4_v1c47990|Response_reg_8-116	--RDLVRGLAHEIKNPLGGLRGAAQLLAKPDPALTEYTKVIIEQADRLRNLVDRLLGPQR----VWIVDDDSSIRWVLERALTGAGL-SCATFEGGNDVLEALATQTPDVLLSDIRMPGIDGLALLKQIKQRHPMLPVIIMTAHSDLDAAVSAYQQGAFDYLPKPFDIDEAVALV-
>BCAH820_0628_HK_Classic|Bacillus_cereus_AH820|Pair_BCAH820_0627|HisKA_167-234/BCAH820_0627_RR_OmpR|Bacillus_cereus_AH820|Pair_BCAH820_0628|Response_reg_3-112	-QQQFVSDASHELRTPLAVIQSKTDILQSTIEEKAMDISTISKECRRLSKLVANLLLLARSDS--LVVEDNASLLESIVQILC-DEF-EVDTALNGEDGLFLALQNIYDAILLDVMMPEMDGFEVIQKIRDKKIETPVLFLTARDSLEDRVKGLDFGGDDYIVKPFQAPELKARIR
>BCAH820_1913_HK_Classic|Bacillus_cereus_AH820|Pair_BCAH820_1912|HisKA_63-124/BCAH820_1912_RR_OmpR|Bacillus_cereus_AH820|Pair_BCAH820_1913|Response_reg_6-115	MKNEMISNISHDLRTPVTSLIGYADLLGNNGEECEQYVSILKRKSYELKNQVDELLEY------ILIVDDDQDIVRFMNVNLMQEGF-KVFSAYNGEEALEIINNNSIQLAILDIMMPQMDGIELCRRIREKH-SLPIIFLSAKSSDVDKVVGFSTGADDYIVKPFSTIEFIARV-
>BCAH820_2241_HK_Classic|Bacillus_cereus_AH820|Pair_BCAH820_2240|HisKA_232-294/BCAH820_2240_RR_OmpR|Bacillus_cereus_AH820|Pair_BCAH820_2241|Response_reg_5-115	-QQQFVSDASHELRTPLTVIESYAKLLKRKQDVLEESVEAIYSEAVRMKGMTNQMLLLANS---ILIVEDEEKIARVVQLELEFEGY-ESEIAKTGTEAMEKFGNGNWDLILLDVMLPNISGLEVLRRIRLKNAVIPIILLTARDSVVDKVSGLDQGASDYITKPFQIEELLARIR
>BCAH820_3208_HK_Classic|Bacillus_cereus_AH820|Pair_BCAH820_3209|HisKA_226-292/BCAH820_3209_RR_OmpR|Bacillus_cereus_AH820|Pair_BCAH820_3208|Response_reg_5-114	-QRYFFSAASHELKTPIAATSILLEGMLEY-KDHPKYLRECMKMMDAQDNVISEILEIV-----ILLVEDDEHICNAVKVFLSGAGY-KVDACFNGDEAHTKFYDNTYQLVILDILLPGMNGHELLREFRKLN-NTPVLMMTALSDDENQIRAFDAEADDYVTKPFKIQLLLKRVE
>BCAH820_3236_HK_Classic|Bacillus_cereus_AH820|Pair_BCAH820_3235|HisKA_209-275/BCAH820_3235_RR_OmpR|Bacillus_cereus_AH820|Pair_BCAH820_3236|Response_reg_3-113	-EKQFTSDASHELRTPTSVIISQCEYAQRNPKEMEESLEVILKQSRKMSALISQLLLLARADQGVLIVEDEQDLQNILVKRLNAEHY-SVDACGNGEDALDYINLATYDLIVLDIMIPGINGLQVLQKLRADNHTTPVLLLTAKDTIDDRVKGLDLGADDYLVKPFAFDELLARIR
>BCAH820_4518_HK_Classic|Bacillus_cereus_AH820|Pair_BCAH820_4519|HisKA_127-179/BCAH820_4519_RR_OmpR|Bacillus_cereus_AH820|Pair_BCAH820_4518|Response_reg_4-113	-------QWIHQMKTPVSVIELLLQKFGKEHREARATVESIREENNRILNGLDLALHMARLEQ-ILIVEDDEKIAGILEEHLERYGY-QSFRASDLRHIKDEFVKVNPHLVLLDINLPYFDGFYWCRQIRTVS-NAPIIFVSARTGEMDQVMAIENGGDDYITKPFHLDVVMAKV-
>BCAH820_4962_HK_Classic|Bacillus_cereus_AH820|Pair_BCAH820_4963|HisKA_138-205/BCAH820_4963_RR_OmpR|Bacillus_cereus_AH820|Pair_BCAH820_4962|Response_reg_6-115	SKDQLVVNLAHDLRTPLTSVLGYLDLLKDTKEQIKHFSTIAYTKSQRLESLIDELFEITRMN--ILIADDEAEIADLIEIHLEKEGY-HVVKAADGEEAMHIIETQPIDLVVLDIMMPKMDGYEVTRQIRAKH-HMPIIFLSAKTSDFDKVTGLVLGADDYMTKPFTPIELVARVN
>c0509_HK_Classic|Escherichia_coli_CFT073|Pair_c0508|HisKA_203-268/c0508_RR_OmpR|Escherichia_coli_CFT073|Pair_c0509|Response_reg_5-117	ARRNFFANVSHELRTPLTVLQGYLEMMDEEGAVREKALHTMREQTQRMEGLVKQLLTLSKIEA-ILVVEDEVPIREMVCFVLEQNGF-QPVEAEDYDSAVNQLNEPWPDLILLDWMLPGGSGIQFIKHLKRESRDIPVVMLTARGEEEDRVRGLETGADDYITKPFSPKELVARIK
>c1508_HK_Classic|Escherichia_coli_CFT073|Pair_c1509|HisKA_272-318/c1509_RR_OmpR|Escherichia_coli_CFT073|Pair_c1508|Response_reg_3-111	----TLTDLTHSLKTPLAVLQSTLRSLRSEKMSVSDAEPVMLEQISRISQQIYYL---------VLVVEDNALLRHHLKVQIQDAGH-QVDDAEDAKEADYYLNEHLPDIAIVDLGLPDEDGLSLIRRWRSNDVSLPILVLTARESWQDKVEVLSAGADDYVTKPFHIEEVMARM-
>c5203_HK_Classic|Escherichia_coli_CFT073|Pair_c5204|HisKA_450-512/c5204_RR_PrrA|Escherichia_coli_CFT073|Pair_c5203|Response_reg_11-121	--GQTMTTLAHEINQPLNALSMYLFTARRQKEQASMMLGKAEGVISRIDAIIRSLRQFTRR---ILLIDDDADVLDAYTQLLEQSGY-RVFACNNPFEAQAWIQPDWPGIVLSDVCMPGCSGIDLMMLFHQDDQQLPILLITGHGDVPMAVDAVKKGAWDFLQKPVDPGKLLSLV-
>Mesci_0201_HK_Classic|Mesorhizobium_ciceri_biovar_biserrulae_WSM1271|Pair_Mesci_0200|HisKA_211-273/Mesci_0200_RR_PrrA|Mesorhizobium_ciceri_biovar_biserrulae_WSM1271|Pair_Mesci_0201|Response_reg_18-127	--DGLAAAAAHELGTPLATIALVAKEMEKKDPKYGEDVTLLRSQSERCREILKRLTSLSSEG---LVVDDDKPFLTRLARAMEARGF-VVETAESVEEAVAKARANPPAYAVVDMRLGDGNGLDVVAAIREKREDSRTIILTGYGNIATAVTAVKLGAVDYLSKPADADDIFAAL-
>Mesci_0468_HK_Classic|Mesorhizobium_ciceri_biovar_biserrulae_WSM1271|Pair_Mesci_0469|HisKA_358-423/Mesci_0469_RR_OmpR|Mesorhizobium_ciceri_biovar_biserrulae_WSM1271|Pair_Mesci_0468|Response_reg_4-113	---SFAADVSHELKNPLTSLRSAVETLLANDDSRGRLMDIIQHDVRRLDRLITDISDASRLDA-IALVDDDRNILTSVSIALESEGY-RVETYTDGASALEGLAARPPNLAILDIKMPRMDGMELLRRMRQKS-DLPVIFLTSKDDEIDELFGLKMGADDFIRKPFSQRLLVERVR
>Mesci_0887_HK_Classic|Mesorhizobium_ciceri_biovar_biserrulae_WSM1271|Pair_Mesci_0888|HisKA_234-299/Mesci_0888_RR_OmpR|Mesorhizobium_ciceri_biovar_biserrulae_WSM1271|Pair_Mesci_0887|Response_reg_3-113	--KQVSANIAHDLKTPLNRLQMILDTASESGRKIAAELAEAHAESLQINETFDALLRIAQIEAG-LLVEDDHRTADYIVRGLTEAGH-VCDLLRNGHDGLFAATRGKYDVIVADRMIPGLDGLSMVKAVRAAGVRTPAIFLTSVGGIDDRVEGLEAGGDDYLVKPFAFSELLARIN
>Mesci_0924_HK_Classic|Mesorhizobium_ciceri_biovar_biserrulae_WSM1271|Pair_Mesci_0923|HisKA_325-392/Mesci_0923_RR_OmpR|Mesorhizobium_ciceri_biovar_biserrulae_WSM1271|Pair_Mesci_0924|Response_reg_5-114	--QTFATHVSHELKSPLTAIQGAAELLRDDDAERRRFSNNIVTDAGRLNLLVRRLLDLARAEN-ILVADDDPHIREVICFALEKAGM-KTTGVADGAAALQAIGRRAPDLVVLDIGMPEMDGLEVCRRLRHIS-DVPVLFLSARDEEIDRILGLEMGGDDYVTKPFSPRELVARVN
>Mesci_1197_HK_Classic|Mesorhizobium_ciceri_biovar_biserrulae_WSM1271|Pair_Mesci_1198|HisKA_467-534/Mesci_1198_RR_OmpR|Mesorhizobium_ciceri_biovar_biserrulae_WSM1271|Pair_Mesci_1197|Response_reg_17-125	-QRDFVALVSHEFRGPLAVISAAADNLSSSADNIKLRTTRIRQTVKRMSSLIENVLAFDRLNGGVYLVDDDRDFREEMVFGLSRLGL-NVHGFHNAAALYRACAAKPAEIVILDIGLEGEDGLSIATHLRALQ-SVGIVMATARSSIDDRLNGLEAGADAYLVKPIDVRELAATV-
>Mesci_1804_HK_Classic|Mesorhizobium_ciceri_biovar_biserrulae_WSM1271|Pair_Mesci_1805|HisKA_669-736/Mesci_1805_RR_OmpR|Mesorhizobium_ciceri_biovar_biserrulae_WSM1271|Pair_Mesci_1804|Response_reg_8-118	-RSALLTSISHDLKTPLAAIMGAAGTLRDPEPDRAELLSTVLDESERLNRFIANLLDMTKIESGILVVDDEPPIRKLLRVGLGSQGY-AISEAPNARAAIELMEAEKPDLVLLDLGLPGMSGHELLRKWRDDGLDIPVVILSSRTDEAGIVQALELGADDYVTKPFGMNELVARIR
>Mesci_1924_HK_Classic|Mesorhizobium_ciceri_biovar_biserrulae_WSM1271|Pair_Mesci_1925|HisKA_252-311/Mesci_1925_RR_OmpR|Mesorhizobium_ciceri_biovar_biserrulae_WSM1271|Pair_Mesci_1924|Response_reg_4-114	-QADFMRVVSHEFRTPLAIIRNAADMIGLSPEATRERIAGIGEALDRLFSLIDRF---------ILIVEDEPRLRKDLADFLELTGF-TAEGVATAGELRQTLANGSPAVIILDVGLPDGNGFDLATEIRKSH-ACGIIMLTALGDSDDRIRGFESGADIYLVKHSTLREIDAAI-
>Mesci_2174_HK_Classic|Mesorhizobium_ciceri_biovar_biserrulae_WSM1271|Pair_Mesci_2175|HisKA_267-325/Mesci_2175_RR_OmpR|Mesorhizobium_ciceri_biovar_biserrulae_WSM1271|Pair_Mesci_2174|Response_reg_20-129	-RTAMLTGVSHDLRTILTRFKLQLALS----GGKAETKAALDQDIDDMQSMLEGYLSFARGEA--LVVDDDTRIRNLLKQYLTENGF-RVTVAGNAGEARRKLAGLDFDLLVLDVMMPGETGVDLTKSLRAEK-NVPILMLTALSETDSRISGLEAGADDYLPKPFDPRELILRI-
>Mesci_2864_HK_Classic|Mesorhizobium_ciceri_biovar_biserrulae_WSM1271|Pair_Mesci_2865|HisKA_210-262/Mesci_2865_RR_OmpR|Mesorhizobium_ciceri_biovar_biserrulae_WSM1271|Pair_Mesci_2864|Response_reg_7-117	SRMRLVAAAGHDLRTPMTRMRLRAEFLDDD-------LDELDRIADSAIRL-------------ILVVDDDREIRTLLQRYLDSQGF-RVTAAADRRECEQRLGSGQFDLIVLDVMLPDGSGLDICRGLRDRKPHTPIILLTALKEDVDRIIGLELGADDYLGKPFNPRELIARIR
>Mesci_3722_HK_Classic|Mesorhizobium_ciceri_biovar_biserrulae_WSM1271|Pair_Mesci_3723|HisKA_217-280/Mesci_3723_RR_PrrA|Mesorhizobium_ciceri_biovar_biserrulae_WSM1271|Pair_Mesci_3722|Response_reg_7-115	-MGLLASGAAHELGTPLATLSVILNDWQRADPDLAQEIREMQGQLDRCKKIVSGILM--------LIVEDDIAFANALRRSFERRDY-ETHSCRSVDGVQALIGTVAFQYAVVDLKLASGSGLECVRALHEHDPEMRIVVLTGFASIATAVEAIKLGACQYLAKPANTDDIEAA--
>Mesci_4229_HK_Classic|Mesorhizobium_ciceri_biovar_biserrulae_WSM1271|Pair_Mesci_4230|HisKA_230-285/Mesci_4230_RR_OmpR|Mesorhizobium_ciceri_biovar_biserrulae_WSM1271|Pair_Mesci_4229|Response_reg_14-123	-RTRMLRSVSHDLRTPLTRLRLRAERMDDP------IRTAILSDVQHIEILIDET---------ILIVEDDLEIARMLGDTLTDNGM-TVEIAESGVQMNAALRTQKFDLIVLDVMLPGENGLNICRRLRAAT-NIPILMLTALGEEIDRIFGLEIGADDYVTKPFSARELTARIR
>Mesci_4687_HK_Classic|Mesorhizobium_ciceri_biovar_biserrulae_WSM1271|Pair_Mesci_4686|HisKA_232-297/Mesci_4686_RR_OmpR|Mesorhizobium_ciceri_biovar_biserrulae_WSM1271|Pair_Mesci_4687|Response_reg_3-113	AQRRFIANAAHQLRTPLALLSTQASYALRAADARQEALVALQASSGKLARLAEQLLTLSRAEPG-LLVEDNRELADWLGKTLRQANY-VVDIVHDGEDVEHALAAGDHALVILDLALPRMSGLEVLRMLRTRGNRVPVIVLTANASLDGRVKGLNEGADDYLAKPFQIEELEARIR
>Mesci_4870_HK_Classic|Mesorhizobium_ciceri_biovar_biserrulae_WSM1271|Pair_Mesci_4871|HisKA_267-332/Mesci_4871_RR_OmpR|Mesorhizobium_ciceri_biovar_biserrulae_WSM1271|Pair_Mesci_4870|Response_reg_20-130	---QVSDNIAHDLKTPLTRLRNRAEATLSKPTDYRQALEGTIAESDQLIKTFNAILMISRLEAGILVIEDDREAADYLQKAFAEAGH-TAHVAGDGETGFALADAGDYDVMVIDRMMPRRDGLSVIAGLRSRGNTTPVLILSALGEVDDRVTGLRAGGDDYLTKPYAFSELLARV-
>Mesci_4879_HK_Classic|Mesorhizobium_ciceri_biovar_biserrulae_WSM1271|Pair_Mesci_4880|HisKA_267-318/Mesci_4880_RR_OmpR|Mesorhizobium_ciceri_biovar_biserrulae_WSM1271|Pair_Mesci_4879|Response_reg_3-113	---TQVGNLAHSLKTPLAVLLNEGRALGGAASMQKQYLQRARVAAQ------------------VLVVEDDKDLNRQISDALVDAGY-VVDRAFDGEEGHFLGDTEPYDAVVLDIGLPQMDGISVVERWRRGGRKMPVLILTARDRWSDKVSGIDAGADDYVTKPFHIEEVLARL-
>Mesci_5189_HK_Classic|Mesorhizobium_ciceri_biovar_biserrulae_WSM1271|Pair_Mesci_5188|HisKA_435-498/Mesci_5188_RR_NtrC|Mesorhizobium_ciceri_biovar_biserrulae_WSM1271|Pair_Mesci_5189|Response_reg_8-118	-LGQIAAGVAHEINQPVAAIRTYAENAGRKTGSASGNLTSIVSMTERIGAITGTLRTFARR---VALVDDDADLLHATTQLLELAGF-TVVALDAAEAALAVVDRNFEGVVVSDIRMPGMNGLQLFDRIKAIDADIPVILVTGHGDVDLAVAALKDGVYDFIPKPYAGERLVEAL-
>Mesci_5968_HK_Classic|Mesorhizobium_ciceri_biovar_biserrulae_WSM1271|Pair_Mesci_5967|HisKA_271-320/Mesci_5967_RR_OmpR|Mesorhizobium_ciceri_biovar_biserrulae_WSM1271|Pair_Mesci_5968|Response_reg_3-113	--NRFLTDAAHELRTPIAILRTRAELLKQE-PQSA----RLLHDIERLSHLAQQLLD-------ILLIEDEPEMASVLKTALERQDI-IVDHAATLADAEAVARLGHHDAVVLDRRLPDGDGLSLIPRLRALHLDVPVIALTALSGLDDRVAGLDAGADDYMVKPFATVELVARL-
>FB2170_11156_HK_Classic|Maribacter_sp._HTCC2170|Pair_FB2170_11161|HisKA_272-339/FB2170_11161_RR_OmpR|Maribacter_sp._HTCC2170|Pair_FB2170_11156|Response_reg_4-113	-RRELIANVSHDLRTPLAVLKGYIETLQILSEREKQYLQITHDNVDKLSKLINQLFEYSKLEA-ILIIEDDPEIIKLLEIHLTDLIY-TTAKAMDGQQGLNMALENNYDLILLDLTLPTLDGVEICKKLRAVK-NTPIIMLTAKSEEIDRVLGLEIGADDYITKPFSIRELLARVK
>FB2170_13341_HK_Classic|Maribacter_sp._HTCC2170|Pair_FB2170_13336|HisKA_302-367/FB2170_13336_RR_OmpR|Maribacter_sp._HTCC2170|Pair_FB2170_13341|Response_reg_8-118	-KSDFINNMTHEFKTPIATINLAVEAIKNDKERVMRYLQMIRDENKRMHAQVENVLRISKLE--ILLVEDDPNFGIVLKDYLSMNNF-DVTLAKNGMEGFEKFKKDNYDVCILDVMMPYKDGFTLAREIREKNENVPIVFLTAKTMKEDVLKGYKAGADDYLNKPFDSEVLLMKL-
>FB2170_14498_HK_Classic|Maribacter_sp._HTCC2170|Pair_FB2170_14493|HisKA_185-252/FB2170_14493_RR_unclassified|Maribacter_sp._HTCC2170|Pair_FB2170_14498|Response_reg_4-116	-KTKFLSLVSHEFKTPLSGILTSATLVGKHQEKRDKHLKTIIGEVKHLNAILTDFLSIERLEKGVLLIEDDTVLRENTAELLELSDY-EVITASNGRKGVIAAKEHMPNVIVCDIMMPVLDGYGVLKELGEDEKHIPFIFLSAKTEKKDVRKGMNLGADDYVTKPFEETELINAIE
>V910_200768_HK_Classic|Brucella_ceti_TE10759-12|Pair_V910_200767|HisKA_264-320/V910_200767_RR_OmpR|Brucella_ceti_TE10759-12|Pair_V910_200768|Response_reg_7-116	-REQLAAALAHDLRTPLTLMKLRMELLDDLRQSLSRDLNDIEA---------------------ILIVDDDKDIRDLLHEFLKRRGM-HVSIACNGDEILDVLSRTPIDLVILDVMLPGKSGIEICQDVRRTS-RVPIIMLTAIADAADKILGLEIGADDYIAKPFDPRELLARIR
>V910_101362_HK_Classic|Brucella_ceti_TE10759-12|Pair_V910_101363|HisKA_228-280/V910_101363_RR_OmpR|Brucella_ceti_TE10759-12|Pair_V910_101362|Response_reg_3-113	---TQVGNLAHSLKTPLSVLVNEARAMGGM-----QYLQR------------------------ILIVEDDKDLNRQLSEAMIAAGY-VVDSAYDGEEGHYLGDTEPYDAVVLDIGLPQMDGISVVERWRRSGRTMPVLMLTARDRWSDKVAGIDAGADDYVAKPFHIEEVLARL-
>V910_102050_HK_Classic|Brucella_ceti_TE10759-12|Pair_V910_102051|HisKA_364-429/V910_102051_RR_OmpR|Brucella_ceti_TE10759-12|Pair_V910_102050|Response_reg_10-119	---SFAADVSHELKNPLTSLRSAVETLLATDESRKRLLDVIQHDVRRLDRLITDISDASRLDA-IALVDDDRNILTSVSIALESEGY-RVETYTDGASALDGLMARPPNLAIFDIKMPRMDGMELLRHLRQKS-DLPVIFLTSKDDEIDELFGLKMGADDFITKPFSQRLLVERVK
>C248_0789_HK_Classic|Staphylococcus_aureus_08BA02176|Pair_C248_0790|HisKA_122-180/C248_0790_RR_OmpR|Staphylococcus_aureus_08BA02176|Pair_C248_0789|Response_reg_4-113	-KTELIQNLAHDLKTPLASIISYSEGLRDKDHEIKESYDILIKQANRLSTLFDDMTH--------LIVDDEQDIVDICQTYFEYEGY-KVTTTTSGKEAISLLSND-IDIMVLDIMMTEVNGYDIVKEMKRQKLDIPFIYLTAKTQEHDTIYALTLGADDYVKKPFSPRELVLRI-
>HM1_1290_HK_Classic|Heliobacterium_modesticaldum_Ice1|Pair_HM1_1289|HisKA_245-311/HM1_1289_RR_NtrC|Heliobacterium_modesticaldum_Ice1|Pair_HM1_1290|Response_reg_7-122	SLGQVATWVAHEVRNPLGAIKGLLQLIQEPDGQSRRYCETAVRESERLERFVGDLLAYSRL----LVADDEEAMRLFLSAALERAGH-RVDAVEDGQSALEKIS--KYALALIDLQMPRLPGMDLLSHIRREWPRLPVIILTAHGSIPTAVEAMKLGAADFLVKPLSPGHLRAAV-
>HM1_1059_HK_Classic|Heliobacterium_modesticaldum_Ice1|Pair_HM1_1060|HisKA_433-491/HM1_1060_RR_CheY|Heliobacterium_modesticaldum_Ice1|Pair_HM1_1059|Response_reg_7-121	---QMAAGIGHEIRNPMTTVRGFLQILRAK-DELANHFDLMIEELDRANAIISEFLSLAKH---ILIGEDNVANCELLKKILSPQGH-RVFIAHNGRDVVEMAKRLQPQLLLLDIMMPIMDGFQTIAELQRDWKSIPVMMVTSSSKTADVLRSKAAGVAGYILKPYEPKVLLERI-
>HM1_1536_HK_Classic|Heliobacterium_modesticaldum_Ice1|Pair_HM1_1535|HisKA_250-318/HM1_1535_RR_OmpR|Heliobacterium_modesticaldum_Ice1|Pair_HM1_1536|Response_reg_3-113	-QREFVADASHELRTPLSILQSSIDVIEALSEFSRQVLADMKDEVGRMTRLVGDLLTLARADSGILLAEDDQRLGKLIDHMLRREGH-DVDWVQRGDDAYHYAKASHYDLLVLDWMMPAMDGVILCRQLRQEGLQCPILMLTAKDAVEDRVQGLDAGADDYLVKPFASAELMARL-
>HM1_1582_HK_Classic|Heliobacterium_modesticaldum_Ice1|Pair_HM1_1583|HisKA_85-149/HM1_1583_RR_OmpR|Heliobacterium_modesticaldum_Ice1|Pair_HM1_1582|Response_reg_6-115	SRRQLVSDISHELGTPMTAIQGYLRAMLDV-APDQENLTMIYEKVLLVNQLVEDLFDLSKLE--VLIVEDDTKIQQLLVLYLEKKGY-RTAVAQRGAEALRLFESEQPDLILLDILLPDMDGYQICQEIRSCS-NVPILFMSCMKEADNIIQALKLGGDDYITKPFDPKVLMARVE
>HM1_1645_HK_Classic|Heliobacterium_modesticaldum_Ice1|Pair_HM1_1644|HisKA_82-146/HM1_1644_RR_OmpR|Heliobacterium_modesticaldum_Ice1|Pair_HM1_1645|Response_reg_4-113	-RRRFITAITHDLRTPLASVLGYLEAVHKNPDKKDEYIETAYYKGLTLLNTLNRFFEWAKLD--ILIVEDEIDVAKLVADQLKSEGF-QVLMAHDGKSAIDSIDVEEFNLFILDIMLPDMDGSEVLQYIRRKT-SKPVIMLTAKDNDMDKVVNFTLGADDYIVKPFSLIELTARV-
>HM1_1808_HK_Classic|Heliobacterium_modesticaldum_Ice1|Pair_HM1_1809|HisKA_257-321/HM1_1809_RR_OmpR|Heliobacterium_modesticaldum_Ice1|Pair_HM1_1808|Response_reg_4-113	-QRSFLQTASHELKTPLMSIQGYAEGIKEEGEEAEKGLDTIIAESQRLKGIVDEMILLSKLES-IFIADDEPPILELIRRYLEKEGF-EAVTFTNGDDLLAAYAQQVPDLVILDIMMPGTNGLDVCKRLRRDS-DVPIIIVSAKDDEIDRILGLELGGDDYLSKPFSPRELVVRV-
>HM1_2079_HK_Classic|Heliobacterium_modesticaldum_Ice1|Pair_HM1_2078|HisKA_251-318/HM1_2078_RR_OmpR|Heliobacterium_modesticaldum_Ice1|Pair_HM1_2079|Response_reg_4-116	MRTEFVANVSHELRTPLTSIKGFVETLLDDTKVARRFLSIINEETQRLQRLIEDLLQLSRIES-ILVVEDDQHILELVRFNLEKEGH-TVQVAVDGEAALACLQEELPDLIILDLMLPRLDGLELCRRVRSRNAHLPILMLTAKGEEVDKVIGLEMGADDYMTKPFSPRELVARIK
>HM1_2814_HK_Classic|Heliobacterium_modesticaldum_Ice1|Pair_HM1_2813|HisKA_328-395/HM1_2813_RR_OmpR|Heliobacterium_modesticaldum_Ice1|Pair_HM1_2814|Response_reg_7-116	SMRDLAANVSHDLRTPLFLIQGYAEALRDTPDDRRQMAEIILEETDRMQRLVQDMLQLAQLESGVLLVEDEEKIRRMLRLFLEQEAF-GVVEAEECRPALEILRQGQVDLVILDVMMPGLDGWTTCRKIREFS-EVPILFLTARGEESDRVLGFELGADDYVIKPFSPRELVLRV-
>S23_06480_HK_Classic|Bradyrhizobium_sp._S23321|Pair_S23_06470|HisKA_233-293/S23_06470_RR_PrrA|Bradyrhizobium_sp._S23321|Pair_S23_06480|Response_reg_7-115	-MGLLASGAAHELGTPLASLSVILSDWRRADQELAEDLSEMETSLQRCKSIVTGIL---------IVVEDDAGFARTLKRSFERRGY-DVVLAASIEEVRKVLEERSFGHAVVDLKLGGASGLACVELLHTHDPEMLIVVLTGFASISTAVEAIKLGACHYLAKPSNTDDIEAAF-
>S23_07600_HK_Classic|Bradyrhizobium_sp._S23321|Pair_S23_07610|HisKA_365-430/S23_07610_RR_OmpR|Bradyrhizobium_sp._S23321|Pair_S23_07600|Response_reg_4-113	---MFAADVAHELKNPLTSLRSAVETLARNENSRARLLEVIEHDVKRLDRLISDISDASRLDA-IALVDDDRNILTSVSIALEAEGY-RIMTYTDGASALDGFRTTQPDLAILDIKMPRMDGMETLRRLRQKS-DLPVIFLTSKDEEIDELFGLKMGADDFIRKPFSQRLLVERVK
>S23_13240_HK_Classic|Bradyrhizobium_sp._S23321|Pair_S23_13230|HisKA_241-300/S23_13230_RR_OmpR|Bradyrhizobium_sp._S23321|Pair_S23_13240|Response_reg_4-114	-------DIAHDLRTPLTRVRLALERGRTTLEELQDVSDKAIAGIDQSLAIVTALLRLTEIEN-ILLIEDDAETAEAIVAELADRGF-EVQWAGDGVDGLDRARASSPDAMIVDRMLPGMDGLTVIEALRKDQVRTPVLVLSALGAVDDRVRGLRMGGDDYLTKPFALVELVARIE
>S23_15360_HK_Classic|Bradyrhizobium_sp._S23321|Pair_S23_15370|HisKA_675-742/S23_15370_RR_OmpR|Bradyrhizobium_sp._S23321|Pair_S23_15360|Response_reg_8-117	-RSALLTSISHDLKTPLASVLGAASTMRDSDTEKRDLLATVIDESERLNRFIANLLDMTKLESGVLVIDDEPPIRKLLRMGLTTQGY-EILEAPSGKVALEKLAEG-PALIILDLGLPDVQGHELLRTIRARNESVPIVVLSSRGDEAGKVQALDLGADDYLTKPFGMDELLARL-
>S23_16580_HK_Classic|Bradyrhizobium_sp._S23321|Pair_S23_16590|HisKA_229-284/S23_16590_RR_OmpR|Bradyrhizobium_sp._S23321|Pair_S23_16580|Response_reg_8-117	-RTRMLAAISHDLRTPITRLRLRAEFIED--EGHR---KRMLIDLDQMRSMLESVLSLL-----ILVVEDDRETRTLIAKYLRNNAC-NVTAVSDGREMSRAMADHRVDLIILDVMLPGEDGLSLCRKVRSET-QTPIIMLTARGEDVDRIVGLEMGADDYLSKPFNPRELLARIN
>S23_20330_HK_Classic|Bradyrhizobium_sp._S23321|Pair_S23_20340|HisKA_229-286/S23_20340_RR_OmpR|Bradyrhizobium_sp._S23321|Pair_S23_20330|Response_reg_8-117	-RTRMLAAISHDLRTPITRLRLRSEYIEDP-AQRMQ----TVRDLDQMQSMLESVLSLL-----VLVIEDDQQTRDLIARYLREHSF-SVGAVTNGKEMDRYLSHNRVDLIVLDLMLPGEDGLSLCRRLRAGS-STPIIILTAKGEDLDRILGLEMGADDYLPKPFNPRELLARIN
>S23_30170_HK_Classic|Bradyrhizobium_sp._S23321|Pair_S23_30160|HisKA_263-328/S23_30160_RR_NtrC|Bradyrhizobium_sp._S23321|Pair_S23_30170|Response_reg_4-113	ALGRMSAGLAHEIRNPIAAMRLKAENALADGSRSEAALNAILQQVDRLDTLLRDLLEMTQA---VLIVDDDAALREGLAEALADLGH-SPRLAASGREGLAALDGE-VDVVLLDLRMPGMDGIEVLRRIRARTDAPPVVVLTAFASAANTIEAMRLGAFDHLSKPIGRAELKDL--
>S23_33680_HK_Classic|Bradyrhizobium_sp._S23321|Pair_S23_33690|HisKA_251-305/S23_33690_RR_OmpR|Bradyrhizobium_sp._S23321|Pair_S23_33680|Response_reg_3-113	--KRFVADAAHELRTPIAILNTRLESLAP-GPDK----TRLLEDAARLATLAEQLLDIQRLD--ILLVEDEAEMACALASALKRYDM-VVDHAPTLAEAEEAISADVHAAVLLDRQLPDGDGLALIPKLRARAGGVPIIVLTARGELADRVAGLDSGADDYLAKPFAVEELLARL-
>S23_36920_HK_Classic|Bradyrhizobium_sp._S23321|Pair_S23_36910|HisKA_484-554/S23_36910_RR_NtrC|Bradyrhizobium_sp._S23321|Pair_S23_36920|Response_reg_5-113	--GDVARRIAHEIKNPLTPIQLSAERIRRDKQIFEQCTDTIVRQVDDIRRMVDEFSRFARM---ILIVDDEADIRDLVAGILEDEGF-VTRTARDSDTALAEIANRRPHLVFLDIWLQGLDGLQLLEQVKKDNADLPVVMISGHGNIETAVAAIKRGAYDFIEKPFKADRLIL---
>S23_36940_HK_Classic|Bradyrhizobium_sp._S23321|Pair_S23_36930|HisKA_143-194/S23_36930_RR_NtrC|Bradyrhizobium_sp._S23321|Pair_S23_36940|Response_reg_6-115	----LAAMLAHEIKNPLSGIRGAAQLLEQASSEDRMLTRLICDEADRIVTLVDRME--------ILVADDDTAIRTVLNQALSRAGY-EVRLTGNAATLWRWVSQGEGDLVITDVVMPDENAFDLLPRIKKMRPNLPVIVMSAQNTFMTAIRASERGAYEYLPKPFDLKELIAIV-
>S23_45000_HK_Classic|Bradyrhizobium_sp._S23321|Pair_S23_45010|HisKA_241-297/S23_45010_RR_OmpR|Bradyrhizobium_sp._S23321|Pair_S23_45000|Response_reg_3-113	-QRQFTADAAHQLRTPLAILRTRIETLGD-----GAAREVLHADIEGMSRIVAQLLEIAELDT--LIVEDNAELSRLVAAGLAAAGY-ESDIVGSAAEAREAVSSVSYAAMILDLGLPDGDGLSVLRELRRQMEPLPVLVLTARGGLQDRVTGLRSGADDYLAKPFAMEELVARL-
>S23_48700_HK_Classic|Bradyrhizobium_sp._S23321|Pair_S23_48710|HisKA_238-303/S23_48710_RR_OmpR|Bradyrhizobium_sp._S23321|Pair_S23_48700|Response_reg_10-120	---EVSDNIAHDLKTPLTRLRNRAEEALASEADYRAALERTIEESDGLIRTFNALLMIARAESG-LIIEDDRESADYLVKAFREVGH-IADHAADGEEGLAMAENGEYDVLVVDRMLPKRDGLSLIGVLRDKGNTTPVLILSALGQVDDRIKGLRAGGDDYLPKPYSFAELLARV-
>S23_52950_HK_Classic|Bradyrhizobium_sp._S23321|Pair_S23_52960|HisKA_174-238/S23_52960_RR_CheY|Bradyrhizobium_sp._S23321|Pair_S23_52950|Response_reg_1-105	-QEQFMAVLGHDLRNPLAAIAAGTRLLARLDEKAKSLIAMMETSTIRMSSLIEDVIDLARSR-----VEDEPLILLDVELGLQQADH-TVISVCNADRAISILRAQAVDLVLTDIDMPGMDGLELAAAVRDGWPPVKIVLMSGKRRPA--DDELPPHA-RFIPKPFSQSQLLQTV-
>S23_60930_HK_Classic|Bradyrhizobium_sp._S23321|Pair_S23_60920|HisKA_258-316/S23_60920_RR_OmpR|Bradyrhizobium_sp._S23321|Pair_S23_60930|Response_reg_23-132	-RTAMLAGVSHDLRTILTRFKLELELIGD-----SPELEGMRKDVDEMSMMLEDYLAFARGDSG-LLVDDDRRIRDLLSRFLASEGY-RVTTAASAGDARSKLLGLHFDLLILDVMMPGETGFDLARFIRTSS-SVPIVMLTARHEAEARIEGLQIGADDYVAKPFEPRELALRI-
>S23_62350_HK_Classic|Bradyrhizobium_sp._S23321|Pair_S23_62340|HisKA_320-387/S23_62340_RR_OmpR|Bradyrhizobium_sp._S23321|Pair_S23_62350|Response_reg_5-114	---TFSAHLTHELKSPLTSIKGAAELLQDTPAEQKTFIANILSDTQRLEAMAQRLRELARAES-ILIVDDEGHIREVIRVALKKAGM-DVIEARDGKQALVRFAADRPDLIVLDIGMPEFDGLDVCREIRKGS-DVPILFLSARDEEIDRILGLEIGGDDYVTKPFSPRELVARVN
>S23_69040_HK_Classic|Bradyrhizobium_sp._S23321|Pair_S23_69050|HisKA_212-273/S23_69050_RR_PrrA|Bradyrhizobium_sp._S23321|Pair_S23_69040|Response_reg_15-125	--DGLAAAAAHELGTPLATIFLISRELEKKDPSFAADLKTLREQTQRCREILSKITQLSSTG---LIVEDDKPFLERLSRAMETRGF-AVTSCDTVSDGLAQIGKAAPAYAVVDLRLGDGNGLDVVSALKKKRPEARAIVLTGYGNIATAVTAVKMGAIDYLSKPADADDVVAAL-
>DND132_0169_HK_Classic|Desulfovibrio_desulfuricans_ND132|Pair_DND132_0170|HisKA_274-334/DND132_0170_RR_NtrC|Desulfovibrio_desulfuricans_ND132|Pair_DND132_0169|Response_reg_7-116	--GQFSAGVAHEINEPLANILGFAELALQLPEQVTTDLNNIVDSSLHAREIIRKLMFFGR----ILAVDDSKSTLEVLKRNLVPAGY-DVFTCGRVDEAVALLEDVVIDLVITDYRMPAASGLDLIKHVRANLPDVEIMMITGYPSIPGAVEAIKDGAGEYLAKPFTTEELLSS--
>DND132_0181_HK_Classic|Desulfovibrio_desulfuricans_ND132|Pair_DND132_0180|HisKA_569-630/DND132_0180_RR_NtrC|Desulfovibrio_desulfuricans_ND132|Pair_DND132_0181|Response_reg_5-113	-VGQLAAGLAHEINNPLGVILCYAELLAAKNGQAQADLAVIIRHTEMAQRVVRDLLDFSR----ILIVDDEPDFAQGLARLIAFPEV-EISLTGDGAEALEILKSSGVDLMLSDLRMPRLNGQELLHRALEIEPGLTVILVTGFGSVEAAVTALKAGAYDFLTKPVKRDELLRSV-
>DND132_0638_HK_Classic|Desulfovibrio_desulfuricans_ND132|Pair_DND132_0637|HisKA_240-304/DND132_0637_RR_OmpR|Desulfovibrio_desulfuricans_ND132|Pair_DND132_0638|Response_reg_7-116	--RELTANLSHELRSPLARIRVSQQILERRTDGVVKHVRRMEEEIDHMDSLIDQIMKLSKLD--ILIIDDDQKLRDLVAEYLGEYDF-PTATLPSGMKAVETIRSLNPSVIVLDVMMPGKDGLEVLRDIRVEF-ATPVIMLTAKGEDTDRIVGLELGADDYMAKPFNPRELLARIK
>DND132_1173_HK_Classic|Desulfovibrio_desulfuricans_ND132|Pair_DND132_1174|HisKA_250-313/DND132_1174_RR_NtrC|Desulfovibrio_desulfuricans_ND132|Pair_DND132_1173|Response_reg_6-112	-IGTLASGIAHQLNNPLNNISTSAQILEEQDEFADKMMHNIIQETLRARDIVKGLLEFSRH---ILVIEDERIARENLTHVLTGSGY-EVTAIASAEEGLRELDKKEFDLVITDLMLPGMDGIQILEHIRAHHPLTIVIVVTGHATVANAVKAMQKGAHSYIAKPLKLDELRLQV-
>DND132_1306_HK_Classic|Desulfovibrio_desulfuricans_ND132|Pair_DND132_1305|HisKA_443-505/DND132_1305_RR_CheY|Desulfovibrio_desulfuricans_ND132|Pair_DND132_1306|Response_reg_4-113	SLGLLAGGVAHEINTPLGIILGYAQLLQEAGSQIHQDLAIIEKQTQVCKKIVADLLGFSRQ---ILVLDDISDAGMLVKRILERKGH-KVWNFTEEEDALKHAASTAIDLAILDIKLKKMTGVEALEELKKVNPDMKAIMLTGYPTLETARESLRLGAQEYCVKPINKEELEAKV-
>DND132_1359_HK_Classic|Desulfovibrio_desulfuricans_ND132|Pair_DND132_1358|HisKA_429-488/DND132_1358_RR_NtrC|Desulfovibrio_desulfuricans_ND132|Pair_DND132_1359|Response_reg_5-110	--GKMAASLAHEINNPLGVIQANAEDLEELVPDVKDGLLAIQRNAIRAGEITKGLLEAA-----ILLVDDEQELLAVLKRSLGRQGY-VVDTASTGQEAWKALSETAYDLVVSDLAMEPMSGLELLKQIRTIDHIQPFIIMTGAGTIETAVEAIKLGAYHYITKPFKTQELA----
>DND132_1378_HK_Classic|Desulfovibrio_desulfuricans_ND132|Pair_DND132_1377|HisKA_243-310/DND132_1377_RR_NtrC|Desulfovibrio_desulfuricans_ND132|Pair_DND132_1378|Response_reg_7-115	-IGTLTSGIAHELNNPLNNVSLTADTLLEPEAEVRELLGDIINETGRASEVVRNLLDFSREEE---VIDDEAQAAKMVGRALGKLGF-EVETFGLGHNFLARMAEDPFQLAFIDLKLPDMDGIEILEAVKTGFENVEAVIITGHGSIASAVEATAKGAANYIVKPFRLQEIRTV--
>DND132_1383_HK_Classic|Desulfovibrio_desulfuricans_ND132|Pair_DND132_1384|HisKA_182-256/DND132_1384_RR_NtrC|Desulfovibrio_desulfuricans_ND132|Pair_DND132_1383|Response_reg_9-114	----LAEGVAHEINNPLTSIRGFAEALLDLLETFEEYLDIVLKECNRCSEIVHNLLSFGHR---VLVVDDEPFIRKLAERELALPGR-EVTTAATAAQAQRLVKRGDFDVILLDVRLPDGNGNRLLEHFRETLPDVEVIMITGYSEVDSAVEAMKAGAYDYVTKPFSLDRMN----
>DND132_1672_HK_Classic|Desulfovibrio_desulfuricans_ND132|Pair_DND132_1671|HisKA_428-490/DND132_1671_RR_NtrC|Desulfovibrio_desulfuricans_ND132|Pair_DND132_1672|Response_reg_8-121	--GSLAAGVAHEVRNPLSSLRGFAQLFATGQAPLDQYAAAMVQEADRLNRVVTDLLYLAK-----LIVDDEPGHRMMVRAVLEDDGW-TVLEAESGERALTVLAEEAPDVAMVDMKMPGMDGMQLLKELQVRRPSMPVVLLTAFGSVGSAVDAMKRGAFDYLTKPADNDELTAV--
>DND132_2349_HK_Classic|Desulfovibrio_desulfuricans_ND132|Pair_DND132_2350|HisKA_273-335/DND132_2350_RR_OmpR|Desulfovibrio_desulfuricans_ND132|Pair_DND132_2349|Response_reg_10-120	-QRRFIRQIAHELGSPIARTKFGLAVLEELDGDFANRARKISRDVEEIAVLVEDVLGYLRSE--VLMIDDDENLCGVVSDFMGAYGL-EVQYALDGNDGLQMALSSAFDAILLDMMLPDIDGLTILKQLRAKAPKLPVIIISAQTDVSDKIVGLEMGADDYVPKTFAPRELLARL-
>DND132_2883_HK_Classic|Desulfovibrio_desulfuricans_ND132|Pair_DND132_2882|HisKA_374-438/DND132_2882_RR_NtrC|Desulfovibrio_desulfuricans_ND132|Pair_DND132_2883|Response_reg_4-114	ALGEMATAIAHELNQPIAATKTYVASCRLL-DDLDPTLIKVSELGDRMAKVTGQLKSFARR---VILVDDEQSVRDSARQWLELSDF-EVADYADARVALRDITPDYAGIVLTDVKMPGLDGLAFQKKIADIDEHIPVVLFTGHGDIAMAVEAIRGGAYDFVEKPFDPEQILETI-
>DND132_3051_HK_Classic|Desulfovibrio_desulfuricans_ND132|Pair_DND132_3050|HisKA_433-500/DND132_3050_RR_unclassified|Desulfovibrio_desulfuricans_ND132|Pair_DND132_3051|Response_reg_5-114	SLGEMSAGMAHEINQPLNAIKVGSEFLSMPKEHFKEVVNEISAQVDRAAEIIDTLRSFGRK---VLVIDDERPTLKMFTLLLTAYGY-EVLTAENGLEGVEIFKRESPALVLTDIKMPIMDGIEALKAIKKLNPAAEVIVITGHGDMDLAIQALNLDATDFINKPLKREALEKAL-
>BSA_19830_HK_Classic|Streptococcus_agalactiae_09mas018883|Pair_BSA_19840|HisKA_332-397/BSA_19840_RR_OmpR|Streptococcus_agalactiae_09mas018883|Pair_BSA_19830|Response_reg_2-114	-QREFTANVSHELKTPLHVISGYSELLANPNEEVPQFAAKIHKESERLVKLVEDIINLSHLDE-IYCVEDDADIREMMLYTLQMAGF-TAQGFSSSELFWEAIQEKVPDLILLDIMLPGDDGLTILERLRRKHEMIPVIMTTAKGSEYDKVKGLDLGADDYLVKPFGMMEMISRI-
>Murru_0219_HK_Classic|Muricauda_ruestringensis_DSM_13258|Pair_Murru_0218|HisKA_160-219/Murru_0218_RR_NtrC|Muricauda_ruestringensis_DSM_13258|Pair_Murru_0219|Response_reg_8-118	-MGEITAGIAHELNTPLANILGFAELLLDTDTGTRRDLQTILDNAIFSREIVKKLMF-------ILIVDDDIKILELLARRLKEFNY-HVFKAISVKEALFILKDTPIDLLITDIQMPEVDGIQLLKYANEHYPNMPKLVVTGYPSVDGALEVIKSGAMDYMTKPFTKTELKMAV-
>Murru_0433_HK_Classic|Muricauda_ruestringensis_DSM_13258|Pair_Murru_0434|HisKA_626-693/Murru_0434_RR_unclassified|Muricauda_ruestringensis_DSM_13258|Pair_Murru_0433|Response_reg_4-115	-KTQFISTASHEFRAPLSVILSSASLIEKKGERRLAHLEKIKSNVRYLVNILNDFLSVTKLDEGILVIEDHKEFRENTMEILEMANY-VVLGAANGRFGIQMALEHLPDLIISDIMMPEANGYTVLEVLGKDPSKIPFIFLTAKDRKEDMRMGMNLGADDYIYKPYETQELLDAI-
>Murru_0982_HK_Classic|Muricauda_ruestringensis_DSM_13258|Pair_Murru_0983|HisKA_121-187/Murru_0983_RR_OmpR|Muricauda_ruestringensis_DSM_13258|Pair_Murru_0982|Response_reg_8-120	-RKDFLGNVSHELKTPLFTVQGYILTLLDDKKLRKKYLQRANKGVERLIYIVKDLDLITKLEAGILLVDDEPDILEIISYNLSSEGY-EVYTAKNGIEGVAKAKKKSPHLIIMDVMMPEMDGIEACEVIRNTPDHTIITFLTARGEDYSQVAGFDAGADDYITKPIKPKVLVSKV-
>Murru_1288_HK_Classic|Muricauda_ruestringensis_DSM_13258|Pair_Murru_1287|HisKA_149-209/Murru_1287_RR_NtrC|Muricauda_ruestringensis_DSM_13258|Pair_Murru_1288|Response_reg_7-117	-LGEITAGIAHELNTPLANILGFTELLQENDPQALKDLDKIITNT-------------------ILLVDDDIDILELLQRHLKSMDY-HTYKAVSVKEALYILKDTEIDLLVTDINMPEIDGLELVKYVAEHYPNMPKLVVTGFPSVEDASSVIKHGATDYLTKPFTKMELDGAV-
>Murru_1771_HK_Classic|Muricauda_ruestringensis_DSM_13258|Pair_Murru_1770|HisKA_265-325/Murru_1770_RR_CheY|Muricauda_ruestringensis_DSM_13258|Pair_Murru_1771|Response_reg_5-125	-LQNFVRIISHNLRGPISNLLMLSKIYEWKDEINDDIVKKIEHTTEALDQTIKDLLSLS-----IYLVDDEDLVNTVNAIHFRRMGMDRVKSFTNPELALDDLRFRDKTLILLDINMPEMSGFEFLEFMMLEDITNEVLLVTSSESDADKEEAKKYEVKEFITKPLRIEHLEDYL-
>Murru_2334_HK_Classic|Muricauda_ruestringensis_DSM_13258|Pair_Murru_2335|HisKA_203-265/Murru_2335_RR_OmpR|Muricauda_ruestringensis_DSM_13258|Pair_Murru_2334|Response_reg_7-117	--NDFINNLTHELKTPVFSIGLATKILEEVPDNKKAVVELIRTESDRLKKHIEKVLELASMESG-ILVEDDNSLGYLLSEYLGMKGF-NVTWAKDASEAMLKTKTNVFDLAILDVMLPDMDGFELSQKIKAINAELPFIFLTARSLKIDVLKGFSLGAVDYLKKPIDEEELVVRIN
>Murru_2845_HK_Classic|Muricauda_ruestringensis_DSM_13258|Pair_Murru_2846|HisKA_267-334/Murru_2846_RR_unclassified|Muricauda_ruestringensis_DSM_13258|Pair_Murru_2845|Response_reg_4-116	-KTKFLSLVSHEFKTPLSSILTSTSLLSKQ---QDKHIGTIKSKVKYLDNILTDFLSIERLDL-ILLVEDDTSLRENVAELLELSGF-NVCSASNGKIAVDKAIKEQPDLVLCDIMMPEMDGYEVLEQLSSIERYIPFIFVSAKTEKQDVRRGMNLGADDYLTKPFEEEELLSAIQ
>Murru_3454_HK_Classic|Muricauda_ruestringensis_DSM_13258|Pair_Murru_3453|HisKA_303-368/Murru_3453_RR_OmpR|Muricauda_ruestringensis_DSM_13258|Pair_Murru_3454|Response_reg_8-118	-KSDFINNMTHEFKTPIATINLAVEAIRNDKEKVLRYLGMIRDENKRMHAQVENVLRISKLE--ILLVEDDPNFGIVLKDYLNMNDF-DVVLAKNGMEGFEKFKKDNYDVCILDVMMPYKDGFTLAKEIREKNENVPIIFLTAKTMKEDVLKGYKAGADDYLNKPFDSEVLLMKL-
>F7308_0486_HK_Classic|Francisella_sp._TX077308|Pair_F7308_0487|HisKA_666-733/F7308_0487_RR_OmpR|Francisella_sp._TX077308|Pair_F7308_0486|Response_reg_5-114	---SMLSSVSHDLKTPLASIMGALSSVKSTQEQQDEMIDLALTESKRLDNYIDNIIQMLKVDSGILIVEDEPQIKKLLEKTFLVLGY-DVESAPTASIATSLLGQYHPDVVILDLGLPDQDGQDWLEAVRVSS-DVPIIVVSARNDTEEVVKALENGANDYVKKPFDMPELIARVR
>F7308_0817_HK_Classic|Francisella_sp._TX077308|Pair_F7308_0818|HisKA_116-170/F7308_0818_RR_OmpR|Francisella_sp._TX077308|Pair_F7308_0817|Response_reg_12-122	------NNIAHDLKTPLTRLKNKLESLEQ--TCPNDDTAEALAECNQLLNIFNSILRLNRLEHGVLVADDDKKIAQFIKTKFEENGI-ETTLAHDGKEALFLINTNNYDVVVIDWMMPYLDGISLLKILRKQNVTIPVIILSALDSTENKIQGLTSGSDDYLTKPFSIDELIVRV-
>HCW_00820_HK_Classic|Helicobacter_cetorum_MIT_00-7128|Pair_HCW_00815|HisKA_167-205/HCW_00815_RR_OmpR|Helicobacter_cetorum_MIT_00-7128|Pair_HCW_00820|Response_reg_5-116	---NFLKNTTHELNTPMSALLLSLKTLED--NKQHH---R------------------------IFLLEDDYLLSESIKEFLEHLGY-GVTCAFNGIEAYEMLSIERFNLLLLDVQVPKMNSLELFKNIKNDFISTPTIFITALQDNTTLKHAFSLGASDYLKKPFDLDELEARIK
>HCW_07330_HK_Classic|Helicobacter_cetorum_MIT_00-7128|Pair_HCW_07335|HisKA_205-262/HCW_07335_RR_OmpR|Helicobacter_cetorum_MIT_00-7128|Pair_HCW_07330|Response_reg_4-112	---LFLRSIMHELRTPIAKGQILVAMLEEL-----THLDMLIEQFARIEQL-------------VLMIEDDIELAEILSEYLSQHGI-RVTNYDEPYTGISAVNTQHYDLLLLDLTLPNLDGLEVCKRISKQK-SIPIIISSARSDVEDKVKALDYGADDYLPKPYDPKELLARI-
>ECBD_3092_HK_Classic|Escherichia_coli_BL21-Gold(DE3)pLysS_AG|Pair_ECBD_3091|HisKA_261-327/ECBD_3091_RR_OmpR|Escherichia_coli_BL21-Gold(DE3)pLysS_AG|Pair_ECBD_3092|Response_reg_3-113	-QSNFSADIAHEIRTPITNLITQTEIALSSQKELEDVLYSNLEELTRMAKMVSDMLFLAQADN--LIVEDEKKTGEYLTKGLTEAGF-VVDLADNGLNGYHLAMTGDYDLIILDIMLPDVNGWDIVRMLRSANKGMPILLLTALGTIEHRVKGLELGADDYLMKPFAFAELLARVR
>ECBD_4029_HK_Classic|Escherichia_coli_BL21-Gold(DE3)pLysS_AG|Pair_ECBD_4028|HisKA_237-299/ECBD_4028_RR_NtrC|Escherichia_coli_BL21-Gold(DE3)pLysS_AG|Pair_ECBD_4029|Response_reg_8-118	ALGHLAAGVAHEIRNPLSSIKGLAKYFAEAGGEAHQLAQVMAKEADRLNRVVSELLELVR----ILVVDDDISHCTILQALLRGWGY-NVALANSGRQALEQVRERVFDLVLCDVRMAEMDGIATLKEIKALNPAIPVLIMTAYSSVETAVEALKTGALDYLIKPLDFDNLQATL-
>NMV_0125_HK_Classic|Neisseria_meningitidis_8013|Pair_NMV_0126|HisKA_483-551/NMV_0126_RR_PrrA|Neisseria_meningitidis_8013|Pair_NMV_0125|Response_reg_6-117	-WGEVAKRLAHEIRNPLTPIQLSAERLAWLDEQDAQSTDTIVKQVAALKEMVEAFRNYARS---ILIVDDEIGIRDLLSEILQDEGY-SVALAENAEEARKLRHQARPAMVLLDIWMPDCDGITLLKEWAKNGLNMPVVMMSGHASIDTAVEATKIGAIDFLEKPISLQKLLSAV-
>Halhy_0096_HK_Classic|Haliscomenobacter_hydrossis_DSM_1100|Pair_Halhy_0095|HisKA_125-191/Halhy_0095_RR_OmpR|Haliscomenobacter_hydrossis_DSM_1100|Pair_Halhy_0096|Response_reg_6-118	-RRAFLGDISHELKTPIFNIQGYIESLIDDPVFSLSFLKKAAKNVDRLQTIIQDLETISKLETGILIVDDEPDILEILQYNLEKEGY-QVVTASSGEEALVVAEKEQPNLIVLDIMMPKIDGVEVCRILRTKPDRTAITFLTAREEDYSQIAALDVGGDDYITKPIRPRVFISRI-
>Halhy_0425_HK_Classic|Haliscomenobacter_hydrossis_DSM_1100|Pair_Halhy_0426|HisKA_233-294/Halhy_0426_RR_OmpR|Haliscomenobacter_hydrossis_DSM_1100|Pair_Halhy_0425|Response_reg_4-114	-QKNFISNASHELSTPLTSIIGEADVAKETIEDYQLAMQNILQQAERLDQITKSLLFLAQ----ILLVDDEVSVVNFIKKGLADENY-EVSVAFDGSTGVKMALEAPFDLIILDIMLPDKNGLEVCKEIRFGNIQTPILFLTALGASENVALGLDMGADDYLVKPFKFIELNARI-
>Halhy_0919_HK_Classic|Haliscomenobacter_hydrossis_DSM_1100|Pair_Halhy_0918|HisKA_230-295/Halhy_0918_RR_OmpR|Haliscomenobacter_hydrossis_DSM_1100|Pair_Halhy_0919|Response_reg_4-114	-QQQFIRNASHEIRTPLTAITAEVDLLQKNPEKYQHALENIRQRAGQLNELVTQLLLLAKVEA-ILIIEDEAQIAGLISQTLQEMSF-KTFVALDSSTALDLFDLISPQLVITDLVMPQVSGHELCAQIRNRKRSIPILMLTALGSTEDIVKGLDNGADDYMVKPFRIPELQARV-
>Halhy_1804_HK_Classic|Haliscomenobacter_hydrossis_DSM_1100|Pair_Halhy_1805|HisKA_219-284/Halhy_1805_RR_OmpR|Haliscomenobacter_hydrossis_DSM_1100|Pair_Halhy_1804|Response_reg_3-112	-QKEFTENASHELQTPLAIIQSKLDLMRQLDREQSQHIDEASKALARASRINKNLLLLAKIEN--LIIEDEPELSKSIKEYLSSESY-LCEFADTFQQALEKIALYSYDCILLDLMLPGGDGIKILEELKKQQKEEGVIIISAKNALEDKVLGLQLGADDYLSKPFHLSELAARI-
>Halhy_2679_HK_Classic|Haliscomenobacter_hydrossis_DSM_1100|Pair_Halhy_2678|HisKA_202-269/Halhy_2678_RR_unclassified|Haliscomenobacter_hydrossis_DSM_1100|Pair_Halhy_2679|Response_reg_6-118	-KSRFVSMASHEFRTPLSTILSSADLLEMTAEEQQDHTTRIKSAVNNLISVLNDFLSLSRLEEGILVIEDNQEVRENLEEILELSGY-EVHLAEDGTVGVDAAQKIKPDLILCDVMMPKLDGFGVLNILGKRPAAIPFVFLTAKTERVDFRRGMNLGADDYITKPFFKDELLAVI-
>Halhy_3192_HK_Classic|Haliscomenobacter_hydrossis_DSM_1100|Pair_Halhy_3191|HisKA_204-270/Halhy_3191_RR_OmpR|Haliscomenobacter_hydrossis_DSM_1100|Pair_Halhy_3192|Response_reg_5-115	-QKDFINNMTHEFKTPLSTIQIAADVFLKKDQRLFQYAGIIKEQNTRLNQQVERVLDIARFE---LYVEDDASLSFVTRDNLELNGY-QITCCADGKEAMDLIKNQRFDLCILDVMLPEVDGFTLAKEIRKYDGEVPILFLSAKSLKEDRLEGLRIGGDDYLTKPYSIEELLLKV-
>Halhy_3331_HK_Classic|Haliscomenobacter_hydrossis_DSM_1100|Pair_Halhy_3330|HisKA_269-335/Halhy_3330_RR_OmpR|Haliscomenobacter_hydrossis_DSM_1100|Pair_Halhy_3331|Response_reg_6-115	MKTDFINNMTHEFKTPIATISLASDSIVSNPEKVQRFANIIKQENKRMNSQVEKVLQMALLD--ILLVEDDQNFGDVLRSYLEMHDY-DVTLAKDGVEGLESYKKGHYDLCIFDVMMPKKDGFTLAREIREKDREMPIVFLTAKTMKDDVLEGFRIGADDYISKPFNSEELLFRI-
>Halhy_3519_HK_Classic|Haliscomenobacter_hydrossis_DSM_1100|Pair_Halhy_3518|HisKA_572-639/Halhy_3518_RR_LytTR|Haliscomenobacter_hydrossis_DSM_1100|Pair_Halhy_3519|Response_reg_3-109	-KDKFFGIIAHDIRSPIIALDGVGEQMLERPEKLVLLAERVDKTAKQLTALLDNLLNWALLQQGILIVEDEELYADKLEMLIEKLEYTHLGTVDNSSAALQLIRKTPPDLILMDIHIQGHDGIELADLINKEF-DIPIVFITSLQDDLTFNRAARTRPKQFITKPFNELQLQRSI-
>Halhy_4538_HK_Classic|Haliscomenobacter_hydrossis_DSM_1100|Pair_Halhy_4537|HisKA_114-177/Halhy_4537_RR_OmpR|Haliscomenobacter_hydrossis_DSM_1100|Pair_Halhy_4538|Response_reg_3-113	--RNFLLSITHELKSPIASIRLVLETLLRPKEKTTQLQSNALKETERLNTLVNNLLFSAKLES-ILLVEDEENIRDVVKLNLELENF-EVVATGNGRDAIRYFQEQHFDLIILDVMLPEIDGFQICEQIRLTDMEVPVIFLTAKDAVGDRISGLKRGADDYLTKPFVLEELLLRI-
>Halhy_6162_HK_Classic|Haliscomenobacter_hydrossis_DSM_1100|Pair_Halhy_6163|HisKA_443-507/Halhy_6163_RR_LytTR|Haliscomenobacter_hydrossis_DSM_1100|Pair_Halhy_6162|Response_reg_7-116	-KAQLLAVLSHDLRHPLSNLISLLHLQKNTPEIASQNQARITTNTEMLLENLENMLLWSKEQ---IIVDDDTVDLLMNVSMVRKVPFDLLGTFSSSLEAAQFLQTNQVEVLFLDIDMPEQSGLEFWQSLDPKP---ICVFITAHPE--YALDSYESAAFDFLVKPLKSERF-----
>Halhy_6240_HK_Classic|Haliscomenobacter_hydrossis_DSM_1100|Pair_Halhy_6239|HisKA_189-252/Halhy_6239_RR_OmpR|Haliscomenobacter_hydrossis_DSM_1100|Pair_Halhy_6240|Response_reg_7-113	---DFFNHMAHEFKTPLTNIKLAAGLLGRKKPELKDVLQVITKESNQLIQQIERFLQMASLE--VLIVEDDLSLGFLLMELLESEGY-SVKLARNGQTGLEQFKKQAFDLCILDVMLGDTDGFQVAKQIRLENTQIPFLFLTARVLKEDRLKGYALGAEDYITKPFEEEELLCKI-
>MKAN_02475_HK_Classic|Mycobacterium_kansasii_ATCC_12478|Pair_MKAN_02480|HisKA_236-297/MKAN_02480_RR_OmpR|Mycobacterium_kansasii_ATCC_12478|Pair_MKAN_02475|Response_reg_17-127	--RDFAAVASHELRTPLTAMRTNLEVLHTPPEQRKEITEDTMRTQSRIEATLTALERLAQG----LVVADDEDVLTSLERGLRLSGF-DMTSAKTGPDALGVLAEARPQAVVVDIDQPTLRGVSVVSAVRSVDNRIPVCVLSGRSAISDRVPGLAEGADDFMYKPYRLSELVTRVR
>MKAN_08380_HK_Classic|Mycobacterium_kansasii_ATCC_12478|Pair_MKAN_08375|HisKA_272-339/MKAN_08375_RR_OmpR|Mycobacterium_kansasii_ATCC_12478|Pair_MKAN_08380|Response_reg_34-144	-MRQFITDASHELRTPLAAIQGYAELTRQLPPTTEYALARIESEARRMASLVDELLLLSRLGEGVLLVDDEPALTNLVKMALHYEGW-DVEIAHNGREAIAKFERISPDVLVLDIMLPDVDGLQILQRVRESDDYTPTLFLTARDSVMDRVTGLTAGADDYMTKPFSLEELVARL-
>MKAN_08405_HK_Classic|Mycobacterium_kansasii_ATCC_12478|Pair_MKAN_08410|HisKA_619-686/MKAN_08410_RR_OmpR|Mycobacterium_kansasii_ATCC_12478|Pair_MKAN_08405|Response_reg_4-113	-RRSLLSAVSHDLRTPLAAAKVAVSSLRASPADTAELLATIEESIDALTALVGNLLDSSRLAAGVLVIDDEPHILRALRINLTVRGY-EVITASTGAGALRAAAEHPPDVVILDLGLPDISGIDVLAGLRGWL-TAPVIVLSARTDSSDKVEALDAGADDYVTKPFGMDEFLARL-
>MKAN_08860_HK_Classic|Mycobacterium_kansasii_ATCC_12478|Pair_MKAN_08865|HisKA_239-311/MKAN_08865_RR_OmpR|Mycobacterium_kansasii_ATCC_12478|Pair_MKAN_08860|Response_reg_5-113	-QARLVTDAGHELRTPLTSLRTNVELLMAPEQE--MLRADVLAQIEELSTLVGDLVDLTRGDAGILVVDDDRAVRESLRRSLSFNGY-SVELAHDGLEALDMIASDRPDALVLDVMMPRLDGLEVCRQLRSTGDDLPILVLTARDSVSERVAGLDAGADDYLPKPFALEELLARM-
>MKAN_09365_HK_Classic|Mycobacterium_kansasii_ATCC_12478|Pair_MKAN_09360|HisKA_232-294/MKAN_09360_RR_OmpR|Mycobacterium_kansasii_ATCC_12478|Pair_MKAN_09365|Response_reg_13-123	--RDFAAVSSHELRTPLTAMRTNLEVLSTPEDQRKEVLNDVIRTQSRIEATLSALERLAQG---VLVVDDDSDVLASLERGLRLSGF-EVSTAVDGAEALRSATETRPDAIVLDINMPVLDGVSVVTALRAMDNDVPVCVLSARSSVDDRVAGLEAGADDYLVKPFVLAELVARVK
>MKAN_11330_HK_Classic|Mycobacterium_kansasii_ATCC_12478|Pair_MKAN_11335|HisKA_249-311/MKAN_11335_RR_OmpR|Mycobacterium_kansasii_ATCC_12478|Pair_MKAN_11330|Response_reg_19-129	-MRRFITDASHELRTPLTTIRGFAELYRQAARDVAMLLSRIESEASRMGLLVDDLLMLARLD--ILVVDDEANIVELLSVSLKFQGF-EVHTASNGAQALDRAREARPDAVILDVMMPGMDGFGVLRRLRADGVDAPALFLTARDSLQDKIAGLTLGGDDYVTKPFSLEEVVARL-
>MKAN_13915_HK_Classic|Mycobacterium_kansasii_ATCC_12478|Pair_MKAN_13920|HisKA_250-314/MKAN_13920_RR_OmpR|Mycobacterium_kansasii_ATCC_12478|Pair_MKAN_13915|Response_reg_11-121	--RQFVADASHELRTPLAAIRGYTELAQRDREAVAHAMSRVASETERITRLVEDLLLLARLDSGVLVVDDEPVLAEMVSMALRYEGW-NITTAQDGASAIAAARAARPDVVVLDVMLPDMSGLEVLHKLRRENPRLPVLLLTAKDAVEDRIAGLTAGGDDYVTKPFSIEEVVLRL-
>MKAN_21285_HK_Classic|Mycobacterium_kansasii_ATCC_12478|Pair_MKAN_21280|HisKA_296-362/MKAN_21280_RR_OmpR|Mycobacterium_kansasii_ATCC_12478|Pair_MKAN_21285|Response_reg_8-117	-QRRFTSDVSHELRTPLTTVRMAADLIYDLDPTLRRSTELMVSELDRFESLLNDLLEISRHDAGILVVDDDASLAEMLTIVLRGEGF-DTAVIGDGTQALTAVRELRPDLVLLDLMLPGMNGIDVCRVLRADS-GVPIVMLTAKTDTVDVVLGLESGADDYIMKPFKPKELVARVR
>BL0031_HK_Classic|Bifidobacterium_longum_NCC2705|Pair_BL0030|HisKA_290-356/BL0030_RR_OmpR|Bifidobacterium_longum_NCC2705|Pair_BL0031|Response_reg_4-113	-QKRFVSDVSHELRTPVTTMRMASDLLEMFDPSTKRTVELLAGQISRFQDMLADLLEISRYDAGIFIVDDDQAIGEMLSLVLENEGF-QTVTCLDGLRAVEMFPIVKPDLILLDVMLPGLDGTGVARRIRATS-NVPIIMLTAKSDTLDVVAGLEAGADDYVPKPFKVAELLARIR
>HPAG1_0161_HK_Classic|Helicobacter_pylori_HPAG1|Pair_HPAG1_0162|HisKA_204-265/HPAG1_0162_RR_OmpR|Helicobacter_pylori_HPAG1|Pair_HPAG1_0161|Response_reg_4-113	-RVLFLRSIMHELRTPITKGKILSSMLKE--ELPQKHLNMLIEQFARIEQL-------------VLMIEDDIELAEFLSEFLLQHGI-HVTNYDEPYTGLSAANTQNYDLLLLDLTLPNLDGLEVCRRISKQK-HIPIIISSARSDVEDKIKALDYGADDYLPKPYDPKELLARIQ
>HPAG1_1311_HK_Classic|Helicobacter_pylori_HPAG1|Pair_HPAG1_1312|HisKA_169-221/HPAG1_1312_RR_OmpR|Helicobacter_pylori_HPAG1|Pair_HPAG1_1311|Response_reg_5-116	---HFLKNTTHELNTPMSALVLSLKTLED-----NQQHRRIKIAIQRMSFLY------------IFLLEDDYLLSESIKEFLEHLGY-EVFCVFNGKEAYERLSVERFNLLLLDVQVPEMNSLELFKRIKNDFISTPVIFITALQDNATLKNAFNLGASDYLKKPFDLDELEARIK
>HAPS_0340_HK_Classic|Haemophilus_parasuis_SH0165|Pair_HAPS_0341|HisKA_240-299/HAPS_0341_RR_OmpR|Haemophilus_parasuis_SH0165|Pair_HAPS_0340|Response_reg_4-113	--HRLLSDISHELKTPLTRMQLALSLLLRR-NGESSEITRIEGEITKLDTMIHDLLVLSRKQA-ILLVDDDVDLTELLSELLSLEGF-DIHTVHNGQDALTELKIQSYDLILLDVMMPILNGIETLKQVRQKY-STPVLMLSARDDEIDRVLGLELGADDYLPKPFNDRELVARIK
>HAPS_2055_HK_Classic|Haemophilus_parasuis_SH0165|Pair_HAPS_2054|HisKA_242-305/HAPS_2054_RR_OmpR|Haemophilus_parasuis_SH0165|Pair_HAPS_2055|Response_reg_3-113	--RRFTSDAAHELRSPLAALKIQTEIAQLDTALREKALHNLTQGINRATQLIEQLLTLSRLDN-ILLIEDDPLIGEGLKLGLSKSGF-SVDWFTDGKTGLDALSSAPYDAVVLDLTLPKMDGLEVLQSWRRANQDVPVLILTARDTLDERIMGLQRGADDYLCKPFALAEVVARL-
>EUR_01160_HK_Classic|Eubacterium_rectale_DSM_17629|Pair_EUR_01150|HisKA_268-331/EUR_01150_RR_OmpR|Eubacterium_rectale_DSM_17629|Pair_EUR_01160|Response_reg_4-113	----LISNIAHDLKTPITAVKGYAEGILDTPEKVDKYVRTIYNKANDMDKLINELTLYSKIDT-ILIVEDEVAIADLEKDYLELSGF-EVEVENDGTSGLARALAEDFDLFILDLMLPGIDGFEICKQIREKK-NTPILMVSAKKDDIDKIRGLGLGADDYVTKPFSPSELVARVK
>EUR_07740_HK_Classic|Eubacterium_rectale_DSM_17629|Pair_EUR_07730|HisKA_124-189/EUR_07730_RR_OmpR|Eubacterium_rectale_DSM_17629|Pair_EUR_07740|Response_reg_3-112	-LQELISDISHQVKTPIANLKMINSTLLEPVQKQKEFLTAQASQLDKLDFLMQMMIKTSRLEAGILVVEDDRLLNNTLCYNLNTAGY-AVDSALTKSAAGSFLTEQDYDLIVLDVNLPDGNGFDFCREVKERRPDTAIIFLTANDMESDMLKGYELGAEDYVTKPFPMSVFQKK--
>EUR_08240_HK_Classic|Eubacterium_rectale_DSM_17629|Pair_EUR_08230|HisKA_591-656/EUR_08230_RR_OmpR|Eubacterium_rectale_DSM_17629|Pair_EUR_08240|Response_reg_4-113	-RTELITNVSHDIKTPLTSIINYVDLLQKDNEKVREYLDVLDRQSSRLKKLIQDLLEASKAST-VLVCDDEKDIVSAISIYLTSDGY-EVIPARNGLEALDIVKHNDVHLVLMDIMMPVMDGIEAMVEIRKIS-NVPVILLTAKSEDTDKVLGLTVGADDYVTKPFNPVELQARV-
>EUR_08320_HK_Classic|Eubacterium_rectale_DSM_17629|Pair_EUR_08310|HisKA_222-287/EUR_08310_RR_OmpR|Eubacterium_rectale_DSM_17629|Pair_EUR_08320|Response_reg_4-116	SRQDFTANVSHELKTPLTAISGYAELIENEKEQQIHFATEIRRNAQRLLSLINDIIKLSELDS-IYIVEDDESIREIETIALKNSNY-IVSAFENAKEFYKKLDELVPDLILLDVMLPDESGYDIVRKLRKRPQDIPIIMVTAKTTEMDMIKGLDGGADDYIKKPFSIMELITRVK
>EUR_08750_HK_Classic|Eubacterium_rectale_DSM_17629|Pair_EUR_08760|HisKA_253-312/EUR_08760_RR_OmpR|Eubacterium_rectale_DSM_17629|Pair_EUR_08750|Response_reg_7-116	-QRKFVSNVSHDFRSPLTSIKGYVEAMLDPVEMQDKYLNIILFETERLNKLTKSLIDLNQ----ILIVDDDNNIAELISLYLTKECY-DTKIVNDGEQALIAFEHYKPNMLLLDLMLPGIDGYQVCREIRAKS-DVPIIMLSAKGEVFDKVLGLELGADDYILKPFDSKELVARVK
>EUR_11900_HK_Classic|Eubacterium_rectale_DSM_17629|Pair_EUR_11890|HisKA_254-320/EUR_11890_RR_OmpR|Eubacterium_rectale_DSM_17629|Pair_EUR_11900|Response_reg_5-114	SRQEFVSNVSHELKTPLTSMKVLADSINSPIEMYREFMGDITSEIDRETKIINDLLSLVKMD--VLVVDDEKLIVKGIRFSLLQDGM-EVDCAYDGEEALNMAKANSYDMILLDVMLPKMDGFEVCQAIREFS-DVPIVMLTAKGDDMDKILGLEYGADDYITKPFNILEVKARI-
>EUR_16900_HK_Classic|Eubacterium_rectale_DSM_17629|Pair_EUR_16910|HisKA_253-313/EUR_16910_RR_OmpR|Eubacterium_rectale_DSM_17629|Pair_EUR_16900|Response_reg_4-113	-QEDFTANFAHELKTPMTSIIGYADTLQKSEDEVHSAAGVILNEGMRLEALSFKLLELITLD--ILIVEDDNDINNLICNTLKAEGY-QCERAFDGKEGADKIEQNIYDLLLLDIMLPEINGYELLDYVRRIG-DTPVIIISAMGQVDERIRGLRMGADDYICKPFQIGELLARV-
>EUR_19740_HK_Classic|Eubacterium_rectale_DSM_17629|Pair_EUR_19730|HisKA_272-332/EUR_19730_RR_OmpR|Eubacterium_rectale_DSM_17629|Pair_EUR_19740|Response_reg_4-112	-REQFVADFTHEIKTPMTSIIGYADTMRSPREEQMMALGYIFSEGKRLESMSQKLFE-------ILIVEDEKPISDLIRLNLMKAGY-SCTCAFDGMEAADILEERNFDLIILDVMLPKLNGFELMEYIKPLG--IPVIFLTAKATLDDRLRGLTSGAEDYMVKPFEIVELLARVN
>EUR_23240_HK_Classic|Eubacterium_rectale_DSM_17629|Pair_EUR_23230|HisKA_198-263/EUR_23230_RR_OmpR|Eubacterium_rectale_DSM_17629|Pair_EUR_23240|Response_reg_4-112	--KDALSDISHQLKTPLTSLSINLENLEGASENRNRIMRRAKRDVDNISHMVQAILKLSRLEA-ILLIEDNKGITEGLCDTFTEPEY-ELLTAGNLKEAGALLCEH-PGLVLLDVSLPDGNGFDFYSERLEKE-KTPVIFLTARDEENDIVKGLELGAEDYITKPFSVRELVARVN
>EUR_28610_HK_Classic|Eubacterium_rectale_DSM_17629|Pair_EUR_28600|HisKA_235-300/EUR_28600_RR_OmpR|Eubacterium_rectale_DSM_17629|Pair_EUR_28610|Response_reg_3-112	-KADLITNVSHDIKTPLTSIVNYVDLLKRENENAKYYIHVLEEKSQRLKQLTEDLVETSKITSGILVCDDDKEIVEAIEIYLMQEGY-DVEKAYDGIQAVEIMKNKKIDLMIIDVMMPKLDGIRATLQIRKES-RVPIIILSAKTEDADKILGLNVGADDYVTKPFNPLELVARVK
>EUR_30220_HK_Classic|Eubacterium_rectale_DSM_17629|Pair_EUR_30210|HisKA_233-294/EUR_30210_RR_OmpR|Eubacterium_rectale_DSM_17629|Pair_EUR_30220|Response_reg_4-112	-KKQQMSALAHDIKTPLTIVRGNAELLSELTTEQKKNITYVLNGTTQIQSYVKQLIDVTK----ILAVDDEPAILEMIESILNKDGH-LVTKVSNPLK-INMEELHRYDLILLDIMMPGIDGFELCKRIRALV-DCPILFLTAKTEENSLVNGLSLGADDYISKPFGVMELRARIN
>OTT_0302_HK_Classic|Orientia_tsutsugamushi_str._Ikeda|Pair_OTT_0301|HisKA_296-361/OTT_0301_RR_PrrA|Orientia_tsutsugamushi_str._Ikeda|Pair_OTT_0302|Response_reg_4-116	---DIARKVAHEINNPLTPIQLSASMLADDTIMFTKYLNIISRHAKDIETIIKEFADFAKI---VLIIDDEHDVRALLSDIVKSKGF-TPTTAENSSEALSILDVKLPKIVILDVWLRGLDGLGILEIIRKKHPLVPVIIISGHATIETAVTAIKMGAYDYVEKPFTADKIVTVL-
>BMASAVP1_0009_HK_Classic|Burkholderia_mallei_SAVP1|Pair_BMASAVP1_0010|HisKA_242-307/BMASAVP1_0010_RR_OmpR|Burkholderia_mallei_SAVP1|Pair_BMASAVP1_0009|Response_reg_3-112	-LSQFSSNLAHDMRTPLTNLLAEAQVALSTADEYRDVIESSIDEYQRLSRMIEDMLFLARSDN-ILIVEDEPKTGMYLRKGLTEAGF-IADWVEDGVTGLHQAETEEYDLIILDVMLPGHDGWTVLERLRRAH-STPVLFLTARDDVGDRVKGLELGADDYVVKPFDFVELVARVR
>BMASAVP1_0558_HK_Classic|Burkholderia_mallei_SAVP1|Pair_BMASAVP1_0559|HisKA_230-295/BMASAVP1_0559_RR_OmpR|Burkholderia_mallei_SAVP1|Pair_BMASAVP1_0558|Response_reg_16-125	--RSFAANSAHELRTPIAAALAQTQRLIAPAEPLRERARRVEGALHTLSRVSEQLMQLAKAEDGVLLVEDDPWLGEAVRAQIEKDGH-PTDCVASLAHARRHVAVAPYDLILLDLLLPDGRGLDFLRELRAGGSTVPVIILTALDQVANRIAGLNAGADDYLIKPFDLSELSARV-
>BMASAVP1_1230_HK_Classic|Burkholderia_mallei_SAVP1|Pair_BMASAVP1_1231|HisKA_74-141/BMASAVP1_1231_RR_NtrC|Burkholderia_mallei_SAVP1|Pair_BMASAVP1_1230|Response_reg_13-125	ALGQMAAGITHELNQPLAAIMTLSSNAVRRSADLTRNLELVNDLAGRMGKIVAHMKGFARHES-VYVIEDDAAVRLGCSQALALEGI-GVREFEDAESALAALKRDPPAAIVSDVRLPGMGGLALLDSMKAHPADIPVILMTGHGDVAMAVGAMRCGAYDFIEKPFHSDRLVDTV-
>BMASAVP1_A0604_HK_Classic|Burkholderia_mallei_SAVP1|Pair_BMASAVP1_A0603|HisKA_214-278/BMASAVP1_A0603_RR_OmpR|Burkholderia_mallei_SAVP1|Pair_BMASAVP1_A0604|Response_reg_66-174	--KAFVADAAHELRTPLAAVQIQAQLVARDDVSRREAIVDLQSGVTRATRLAEQLLALARAEPGILLVEDDRMIAEGVRKALKADGC-AVDWVQDGDAALTALGGEAYDLLLLDLGLPKRDGIDVLRTLRARGLALPVLILTARDAVADRVKGLDAGADDYLVKPFDLDELAARM-
>BMASAVP1_A0994_HK_Classic|Burkholderia_mallei_SAVP1|Pair_BMASAVP1_A0993|HisKA_223-276/BMASAVP1_A0993_RR_OmpR|Burkholderia_mallei_SAVP1|Pair_BMASAVP1_A0994|Response_reg_5-115	----MLAGVAHDLRTPLARMRLRAEMMDD-----ARLRDGVVRDVDSMTHIVDQFLVFAHGD--ILIVDDDQELRDLLRDYLVRQGI-EVSVLHDAASLEKRLERERPDLIVLDLMMPGVDGLTVLRQLRAAGDDIPVIMLTARADDVDRIVGLELGADDYLGKPFNPRELLARA-
>BMASAVP1_A1087_HK_Classic|Burkholderia_mallei_SAVP1|Pair_BMASAVP1_A1088|HisKA_639-709/BMASAVP1_A1088_RR_OmpR|Burkholderia_mallei_SAVP1|Pair_BMASAVP1_A1087|Response_reg_10-119	-RNSLLSAISHDLRTPLTAIVGLSSMLANSPAREDELVDAIHDEALRMTGIVTNLLDMARLQAGVVLIEDEKQIRRFVRSALEEEGI-AVFDAETGRQGLIEAATRKPDLAIVDLGLPDGDGLDVIRELRGWS-EMPVIVLSARTHEEEKVAALDAGADDYLTKPFGVSELLARIR
>BMASAVP1_A1297_HK_Classic|Burkholderia_mallei_SAVP1|Pair_BMASAVP1_A1296|HisKA_206-272/BMASAVP1_A1296_RR_OmpR|Burkholderia_mallei_SAVP1|Pair_BMASAVP1_A1297|Response_reg_5-117	MRRDFVANVSHELKTPLTVLSGFLETMRESDDERARYLELMEQQASRMRHIVTDLLVLAKLEG-ILVIEDEPAISELISVNLQHAGHCPI-RAYNAEQAQSLISDVLPDLVLLDWMLPGKSGIAFARDLRNNEKHIPIIMLTARGDEQDKVLGLEIGADDYVTKPFSPKELMARIK
>BMASAVP1_A2231_HK_Classic|Burkholderia_mallei_SAVP1|Pair_BMASAVP1_A2232|HisKA_637-706/BMASAVP1_A2232_RR_NarL|Burkholderia_mallei_SAVP1|Pair_BMASAVP1_A2231|Response_reg_12-126	-MGEMASSIAHELNQPLAAINNYCSGTLASPETLAPALEKTAQQALRAGMIVKRIREFVKR---VFVVDDDEAVRDSLRWLLEANGY-RVQCFSSAEQFLDAYQPAQIACLILDVRMSGMSGLELQERLIAENAALPIIFVTGHGDVPMAVSTMKKGAMDFIEKPFDEAELRKLV-
>BMASAVP1_A2251_HK_Classic|Burkholderia_mallei_SAVP1|Pair_BMASAVP1_A2250|HisKA_154-213/BMASAVP1_A2250_RR_NtrC|Burkholderia_mallei_SAVP1|Pair_BMASAVP1_A2251|Response_reg_6-114	--KQLIRNLAHEIKNPLGGIRGAAQLLEFERDELREYTQVIIKESDRLQTLVDRLLEPHR----IWIVDDDQSIRWVLEKALARESF-ATRSFANVRDALAALDQETPQVLVSDIRMPGGSGLELLQAMHDRLPGLPVIIMTAFSDLDSAVAAFQGGAFEYLAKPFDVDKAVELI-
>BMASAVP1_A2670_HK_Classic|Burkholderia_mallei_SAVP1|Pair_BMASAVP1_A2671|HisKA_272-335/BMASAVP1_A2671_RR_OmpR|Burkholderia_mallei_SAVP1|Pair_BMASAVP1_A2670|Response_reg_3-113	-QKRFIADAAHQMKTPLAGLRTQAEFALRVNADVAHSLEQIATSSEQAARLVTQLLALARAEN-ILIAEDDSILADGLTRSLRQSGY-AVDHVRNGVEADTALSMQTFDLLILDLGLPRMSGLEVLRRLRARNSNLPVLILTAADSVDERVKGLDLGADDYMAKPFALNELEARV-
>BMASAVP1_A2691_HK_Classic|Burkholderia_mallei_SAVP1|Pair_BMASAVP1_A2689|HisKA_326-423/BMASAVP1_A2689_RR_unclassified|Burkholderia_mallei_SAVP1|Pair_BMASAVP1_A2691|Response_reg_44-155	-IGQLAAGVAHEINNPIGFVNANLNTLRSR-----DILALIDESIDRVRRIVCDLRDFSRP---ILIVDDEPSILSALKRLLRTARY-QVVTAESGAAALDVLAVGEVDLIISDMRMPCMTGAEFLARAQTLHPDTMRILLTGYSEIDAVVSAIEGGVYRYLNKPWDDHDLLLTV-
>BMASAVP1_A2799_HK_Classic|Burkholderia_mallei_SAVP1|Pair_BMASAVP1_A2798|HisKA_540-608/BMASAVP1_A2798_RR_PrrA|Burkholderia_mallei_SAVP1|Pair_BMASAVP1_A2799|Response_reg_4-115	-WGEVARRLAHEIKNPLTPIQLSAERLQMDADVLKRGATTIVNQVAAMKRMVDDFRDYAR----ILVVDDEMGIRELLSEILSDEGH-VVDVAENAQAARDYRLRQAPDLVLLDIWMPDTDGVTLLKEWASQGLTMPVIMMSGHATIDTAVEATKIGALDFLEKPITLQKLLKSV-
>BMASAVP1_A2913_HK_Classic|Burkholderia_mallei_SAVP1|Pair_BMASAVP1_A2914|HisKA_201-234/BMASAVP1_A2914_RR_PrrA|Burkholderia_mallei_SAVP1|Pair_BMASAVP1_A2913|Response_reg_7-116	-LGVQAATVAHEMGTPLSTIAMLTEELREL-ARYDADLKVLEEQMSQCTSALARLR---------LVIDDNEVFAGTLARGLERRGY-AVRQAHNKDEALKLAGAEKFEFITVDLHLGNDSGLSLIAPLCDLQPDARILVLTGYASIATAVQAVKDGADNYLAKPANVESILAAL-
>BMASAVP1_A3275_HK_Classic|Burkholderia_mallei_SAVP1|Pair_BMASAVP1_A3276|HisKA_239-303/BMASAVP1_A3276_RR_OmpR|Burkholderia_mallei_SAVP1|Pair_BMASAVP1_A3275|Response_reg_3-113	-QRRFIADAAHQLRTPIAVIDTQIQCARQGDAALAALLASMQRSSRRMADVTDKLLLLAHAEA--LLVEDNAELAHWIVDLLRGEGF-GVDSAPDGESADTVLKAQRYDALLLDMRLPGMSGKELLARLRRRGDNVPVLMLTAHGSVDDKVDCFSAGADDYVVKPFESRELVARIR
>BMASAVP1_A3387_HK_Classic|Burkholderia_mallei_SAVP1|Pair_BMASAVP1_A3386|HisKA_233-298/BMASAVP1_A3386_RR_OmpR|Burkholderia_mallei_SAVP1|Pair_BMASAVP1_A3387|Response_reg_3-113	-QRKFIADAAHQLRTPLTAIKLHAEQAARD-PQQALAVRELRSAADRAVRLSNQLLSLARAEPG-LLIEDDRPIARGIQSSLEQAGF-TVDMVHDGIFAEQALAQNRHELVILDLGLPGIDGMTLLSRFRQTNRHTPVIVLTARDELNDRVQGLNSGADDYMLKPFEPAELEARIR
>LILAB_00990_HK_Classic|Myxococcus_fulvus_HW-1|Pair_LILAB_00995|HisKA_471-539/LILAB_00995_RR_CheY|Myxococcus_fulvus_HW-1|Pair_LILAB_00990|Response_reg_1-113	AKSQFLANMSHEFRTPLNAILGYTNMLLQLNPAQKRNLTRIDSNGRHLLEVINEILDITRIEAGVLVVDDYQDAREMYAEYLEFSGF-RVAEAKNGQEALDKAFELHPDIILMDLSLPIMDGWEATRRLKNDDRTIPVVALTGHAMTGQSDEAKGAGCDSFVTKPCLPDALVDEV-
>LILAB_02050_HK_Classic|Myxococcus_fulvus_HW-1|Pair_LILAB_02055|HisKA_282-349/LILAB_02055_RR_OmpR|Myxococcus_fulvus_HW-1|Pair_LILAB_02050|Response_reg_9-119	MKTDFVSLVSHELRTPLTSIRMFIETLGRDPAQMQEVLTLLMRETERLSIFVERVLDWARIEGGILVVEDDLSILTGLSMNLRFEGY-EVLQAQDGRTGLARALDESPDLVVLDVMLPELNGFEVLKELRQRGRDTPVVVLSAKGLEPDKILGLNLGADDYVVKPFGLQELLARIK
>LILAB_02645_HK_Classic|Myxococcus_fulvus_HW-1|Pair_LILAB_02650|HisKA_202-272/LILAB_02650_RR_NtrC|Myxococcus_fulvus_HW-1|Pair_LILAB_02645|Response_reg_7-118	--QDVARALAHELKNPLTAMKLSLARLSRDSTRITEAVALLQEEVDLLMRMTQSFSTFARLP--ILVVDDDSGVLKALRGLLSDEGF-TPVEARSTAEATRALPEGPPAMMLLDLRMPGETGLELLARLPRPF-ATPVVVLSGEASPAEAVQALRLGATDFVEKPPSPERLLTAIR
>LILAB_02770_HK_Classic|Myxococcus_fulvus_HW-1|Pair_LILAB_02765|HisKA_232-293/LILAB_02765_RR_NtrC|Myxococcus_fulvus_HW-1|Pair_LILAB_02770|Response_reg_6-112	--DAFTRRVAHDLISPLAPLKGYLTLIRRNDAGALEMLAQCESSAVRMGELIEALLRFCRAG--ILVVDDDPQARDLLQRLLGPLGA--VTQAPDPRRATERIAEGAFDLVLTDMAMPEGDGLKVLHEVKAQLPDTPVVVVTAFGNIEGALDSIQQGAFDYLAKPFDVDAILR---
>LILAB_02970_HK_Classic|Myxococcus_fulvus_HW-1|Pair_LILAB_02975|HisKA_284-350/LILAB_02975_RR_NtrC|Myxococcus_fulvus_HW-1|Pair_LILAB_02970|Response_reg_9-119	-LGRFSAQMAHDLKNPIAAMKGAAQYLKEPWDGHGEFLDLLLEQVERLDRVVDTYQRLARVE--VLLVDDDPAVAKVLGALLTQAGL-TTHAARDGQEALALLASKPVDVVVSDVRMPGMDGLQVLAEVSRGWPDVPVILLTAHGTVPLAVEAMKAGAADFVLKPFDREEIL----
>LILAB_03250_HK_Classic|Myxococcus_fulvus_HW-1|Pair_LILAB_03245|HisKA_605-667/LILAB_03245_RR_NtrC|Myxococcus_fulvus_HW-1|Pair_LILAB_03250|Response_reg_1-108	ALGELSAIVAHEVRNPLGVIFNAVASLRRPGGDAAMLLDILGEESDRLNRIVGDLLDYTRP------VDDQRNMRATTALLLRAENY-TVFEAATGEEALAQLASGSIDLLLTDLKMEPMDGLTLLRRALEVAPRLQVIMMTAFGSIESAVEAMRLGAYDYVTKPFKESELRYRV-
>LILAB_04010_HK_Classic|Myxococcus_fulvus_HW-1|Pair_LILAB_04015|HisKA_260-322/LILAB_04015_RR_NtrC|Myxococcus_fulvus_HW-1|Pair_LILAB_04010|Response_reg_1-102	--GKMASGVAHELGTPLNVVMGRAKMISSEGEEVGECAQIISQQAQHMTAIIRQLLDFARRR-----------MRAMLEKGLTRRGF-TPVAMPSADEALVRLAAEDFDVVLTDLRMPGMDGLALCERIALNRPDIPVVVVTAFGSLETAVAAIRAGAYDFVTKPIDVDALVLV--
>LILAB_09120_HK_Classic|Myxococcus_fulvus_HW-1|Pair_LILAB_09115|HisKA_268-330/LILAB_09115_RR_NtrC|Myxococcus_fulvus_HW-1|Pair_LILAB_09120|Response_reg_8-118	-VGQLSAGLAHEIGSPLLILNGRAQGLAALPEDVRRNARILVEQSERIERIVRQLLDLARR----LILDDDAGVVDFLRESLDARGYEAVG-RTSPEEALALFEREPFDLVITDVEMPRMRGTEVLEALLTRKPGQLVVLITAFGGVELAVAAVKAGACDFVTKPFNIDALVLT--
>LILAB_11520_HK_Classic|Myxococcus_fulvus_HW-1|Pair_LILAB_11515|HisKA_216-273/LILAB_11515_RR_PrrA|Myxococcus_fulvus_HW-1|Pair_LILAB_11520|Response_reg_14-122	SLATLAAGAAHELSTPLSTIAVVAKEVERTSESVREDLRLIRQQVDRCRDVLVQM----------LLVDDDATLRERLARAFRERGW-DVTTAGDYDEALAAARRESPEYAVVDLRMPGRSGLEVVRDLLAVDASTRVIVLTGYGSIATTVDAIRLGAVNYLPKPADVDDVLAA--
>LILAB_14485_HK_Classic|Myxococcus_fulvus_HW-1|Pair_LILAB_14490|HisKA_388-453/LILAB_14490_RR_OmpR|Myxococcus_fulvus_HW-1|Pair_LILAB_14485|Response_reg_8-118	-KSDFVATVSHELRTPLASIRLLAETLEWEGTDARDYPARIVREADGLGFLVENLLSFNRIDKG-LLVEDDANLRLALRDNLEQGGY-AVEEATCVREAREHLGRREFQLILLDVMLPDGDGYTLCRALREEGVTTPVLMLTARTLEDDVVRGFESGAQDYLGKPYRLRELLARV-
>LILAB_15320_HK_Classic|Myxococcus_fulvus_HW-1|Pair_LILAB_15315|HisKA_235-293/LILAB_15315_RR_PrrA|Myxococcus_fulvus_HW-1|Pair_LILAB_15320|Response_reg_12-120	SLSTLAAGAAHELSTPLGTIAIAANELDAAPQEALEDARLIRDEVERCRDILERM---------VLVVDDDERFRERLVRAFVRHGF-QAQGAATTQAALEAARTLRPRYAVVDLRLPDGSGLELVRELKALDANTTVVVLTGYGSIATAVEAVRRGATHYLAKPADVDDILLA--
>LILAB_16305_HK_Classic|Myxococcus_fulvus_HW-1|Pair_LILAB_16310|HisKA_234-289/LILAB_16310_RR_OmpR|Myxococcus_fulvus_HW-1|Pair_LILAB_16305|Response_reg_7-116	-LERHLADVAHDLKTPIASLQLSLELASTPTEPAAALLRQGLEDTVYLTSLVDNL---------ILVVEDDAPIAAGIVRGLKLAGF-QVALATDGVLALEMAEREQPDLVVLDLNLPGQDGFEVMEAWRFRL-RVPVIVLTARQELEARLRSFGLGAADYLPKPFWMEELVARIR
>LILAB_21600_HK_Classic|Myxococcus_fulvus_HW-1|Pair_LILAB_21595|HisKA_387-452/LILAB_21595_RR_OmpR|Myxococcus_fulvus_HW-1|Pair_LILAB_21600|Response_reg_14-124	-KSDFVATVSHELRTPLASIRLLGETLERRTPEVRDYPARIVQAADGLHFLVENILSFNRIDKGVLIVEDDAHLRVGLRDNLLDEGY-LVAEAPNTRDAERLLAERAFDLLILDVMLPGEDGYSFCRRLRTQGNKSMVLMLTARSLEDDILKGFEVGAQDYLTKPYRLRELLARVR
>LILAB_22535_HK_Classic|Myxococcus_fulvus_HW-1|Pair_LILAB_22540|HisKA_106-173/LILAB_22540_RR_CheY|Myxococcus_fulvus_HW-1|Pair_LILAB_22535|Response_reg_12-123	--VRYLSMASHDLRGSLANVRSYAALLLNLEPKVQRGLETILRNADRSLAFSQDFFDASRADL-VLVVDDDPDILEALSEILEAEGF-EIRRARNGKEALERLEPEPPNLILLDLMMPVMDGWEFAQRMRQKPPEIPLIVLSADR--NVGSKASDIGAVGHLAKPFELNDLLDMV-
>LILAB_25015_HK_Classic|Myxococcus_fulvus_HW-1|Pair_LILAB_25010|HisKA_231-292/LILAB_25010_RR_OmpR|Myxococcus_fulvus_HW-1|Pair_LILAB_25015|Response_reg_3-113	-QERLIARAAHELRTPLALMRTGLDLALRGAEELRTVLEENRREVDRLAGVAGALLELSAA----LLVEDEERMAKLLRRGLGEEGH-LVDTCRTAEDALEQAGEVAYDAIILDWALPGMDGVALLRRWRERGLMTPVLMLTARGTVGERVTGLRAGADDYLVKPFAFEELLARL-
>LILAB_26590_HK_Classic|Myxococcus_fulvus_HW-1|Pair_LILAB_26585|HisKA_276-343/LILAB_26585_RR_OmpR|Myxococcus_fulvus_HW-1|Pair_LILAB_26590|Response_reg_5-113	ALRDFLANTTHDVMTPLTVLQGHLSALQQR-GEALEVVGDAMGEAHYIASLVHNLAAAARLEAGILLVEDAPQLGAQIVEHLRGAGF-EPAWWREGR-VLAPGELPDVSLVVLDLMLPGTYGLDMLKSLRAFS-EVPVLILSARNDTLDKVRALKLGADDYLTKPFWPEELIERVR
>LILAB_28980_HK_Classic|Myxococcus_fulvus_HW-1|Pair_LILAB_28975|HisKA_326-391/LILAB_28975_RR_OmpR|Myxococcus_fulvus_HW-1|Pair_LILAB_28980|Response_reg_7-116	--RSFAANVSHEFKTPLASIQGAVELLRDSPEQRARFLANVDADARRLTRLVQRLLELARADS-VLVVDDDPHLREIVRFALEQGGF-RVDEAPDGRAALAQVDRALPALIVLDIMMPELDGLAVCREVRRKH-ELPIVFLSSRDDEVDRILGLELGGDDYLTKPFSPRELVARVK
>LILAB_29115_HK_Classic|Myxococcus_fulvus_HW-1|Pair_LILAB_29110|HisKA_199-257/LILAB_29110_RR_NtrC|Myxococcus_fulvus_HW-1|Pair_LILAB_29115|Response_reg_4-114	-LGTMSAVLAHELRNPLASLKGHAQLLAERDAVLAPKADRVVSEAVRLEQLMNDLLGF------ILVADDEEGVRSFLAEALEYEGH-SVTTAADGEEAARLMARQGVDLLLTDLRMPGMDGLTLLRKVREEQPDVEVVVLTAVGTVESAVAAMKAGAFDYLLKPVSPAELRL---
>LILAB_30885_HK_Classic|Myxococcus_fulvus_HW-1|Pair_LILAB_30890|HisKA_253-320/LILAB_30890_RR_NtrC|Myxococcus_fulvus_HW-1|Pair_LILAB_30885|Response_reg_8-118	-KDAFVASASHDLRTPLARLRTAIGLLADLTAQQQRVVELARVACEREIRLVTALLDLTRVQAGVLVVDDDAELCELISLRLEAKGM-RVTTALTAARGLALLESEEPDAVVLDLRLEGVDGLEVLGQMRARSPDLPVVILTAHGTIETAVEAMQRGAYGFLTKPFQDHELFQKL-
>LILAB_31840_HK_Classic|Myxococcus_fulvus_HW-1|Pair_LILAB_31835|HisKA_223-288/LILAB_31835_RR_OmpR|Myxococcus_fulvus_HW-1|Pair_LILAB_31840|Response_reg_4-116	-RKDFVANVSHELRTPITAIRGYAETLQGDPVMAPKMVEIIHRQSERLSELVEDLLELSRLEA-ILIIEDEQDLAGLVDYNLRAAGF-ETETANTGAGGLAKARAHPPDLVLLDLMLPDVAGSEVLRMLKADTRKASVIIVSAKGQESDRVQGLELGADDYVVKPFSVRELLLRV-
>LILAB_33585_HK_Classic|Myxococcus_fulvus_HW-1|Pair_LILAB_33590|HisKA_102-156/LILAB_33590_RR_NtrC|Myxococcus_fulvus_HW-1|Pair_LILAB_33585|Response_reg_4-119	--SRLSSSLSHEIRNPLSSVKMAVQTLARLNDRDKRRLTIANREIRTMERML-------------LIVDDDVSLLETLKMHFEQPRY-QVATATSAAAGLRAAQEAMPSVVILDMMLPDRTGLEIIEEMKGLCGDARIILVTAYHDMETTIRAMKAGAFDYIHKPFDPAAL-----
>LILAB_34405_HK_Classic|Myxococcus_fulvus_HW-1|Pair_LILAB_34400|HisKA_246-307/LILAB_34400_RR_OmpR|Myxococcus_fulvus_HW-1|Pair_LILAB_34405|Response_reg_5-114	-QRELLAAVSHELRTPLARLRVLTELLRD-RGGNPKTLDQVDREVVELDALVGELLASSRLD--VLLIDDDTRMYELLEQYLGQNGL-SVTHAADGGRGLAALEASAFDAVLLDVMMPGMDGLEVCKRIRARS-RIPVIMLTAKGDETDRVVGLELGADDYLPKPFSPRELLARL-
>LILAB_36380_HK_Classic|Myxococcus_fulvus_HW-1|Pair_LILAB_36375|HisKA_163-222/LILAB_36375_RR_NtrC|Myxococcus_fulvus_HW-1|Pair_LILAB_36380|Response_reg_7-113	--GRLAAGVAHEVGNPLAGILGYVALARTDTPELKDFLERIDHEVQRIDRIIRGLLDLGRPG--ILVADDEPSIRHILTLVLTSHGY-DVRAVADGEDALKELNARDYDVLLCDVRMPKKDGLSVLREALAAHPALTAVVMSAYGSQEQALQAVAAGAFDYVQKPFKPDEIV----
>LILAB_36415_HK_Classic|Myxococcus_fulvus_HW-1|Pair_LILAB_36410|HisKA_312-373/LILAB_36410_RR_NtrC|Myxococcus_fulvus_HW-1|Pair_LILAB_36415|Response_reg_15-125	SLGALSAQLAHELRNPLASMRGSAQLLQDQDGVSQKLTNILMRESDRLARLVEDFLRFAR----VLVVDDELSMREYLELLLQREGY-SVTSVAGVKSACDVLAQDGVDLVISDLKLGTGSGLDVLRAARARPASPEVVLITAYGTPAAAVEAMREGAYDYICKPFDNEEMRLL--
>dcmb_80_HK_Classic|Dehalococcoides_mccartyi_DCMB5|Pair_dcmb_79|HisKA_340-393/dcmb_79_RR_OmpR|Dehalococcoides_mccartyi_DCMB5|Pair_dcmb_80|Response_reg_5-115	--------LIHDLKTNLTPMITASELFENKTEPLISLSRNITSGVKGLEKRINDLLDLARSE--IVIIEDDLRIVEMIAMALYIRWPNKVISTRFGEEGIEIVSNENPDAVVLDLGLPDIDGLLVLKAIRRYS-DLPVLILTVRTIESDIVQGLELGADDYMVKPFKQLELLARL-
>dcmb_84_HK_Classic|Dehalococcoides_mccartyi_DCMB5|Pair_dcmb_85|HisKA_269-334/dcmb_85_RR_OmpR|Dehalococcoides_mccartyi_DCMB5|Pair_dcmb_84|Response_reg_1-107	-KAELLSVVSHELRTPLTSIKGLTDSLLRDDNTKKDFLESIRSETGKLSRLIDDLLDTTKLE-----VDDDPIIIKFVKANFIADGW-LVTTASNGQEALRILNQNIPDIIVLDVLMPVMDGMETCIQVRKQS-SIPIIMLSAKGSSFDKIQCLKLGADDYLTKPFDIDELTARVE
>dcmb_121_HK_Classic|Dehalococcoides_mccartyi_DCMB5|Pair_dcmb_122|HisKA_312-377/dcmb_122_RR_OmpR|Dehalococcoides_mccartyi_DCMB5|Pair_dcmb_121|Response_reg_3-114	-RAEFTRILVHELKTPLTPIIAASDMLVKY-DDLHELANQINKGAEELENRMNDLFDLVRGE--ILIIEDNTQTTEVVKLAFKWPDV-RLVEANSGEKGIEMVETAKPDAIILDIGLPDISGYEVLRQIRLFS-ELPVIMLTVRNEEGDIIKALSLGADDYLVKPFRQMELLARIK
>dcmb_238_HK_Classic|Dehalococcoides_mccartyi_DCMB5|Pair_dcmb_237|HisKA_363-425/dcmb_237_RR_OmpR|Dehalococcoides_mccartyi_DCMB5|Pair_dcmb_238|Response_reg_3-114	---EFTRALVHELKTPLTPIMAASDTLSSKQEPWLNLAQNINKGALNLNKRIDELLDLARGE---LLIEDDAEIIDVVCTIFQSCPNSRVLSASNGRRGIETVESANPDIILLDLGLPDMNGFDVLKQIRTFS-DTPIIILTVRGDESDVVRGLTLGANDHIIKPFRQMELLARV-
>dcmb_1372_HK_Classic|Dehalococcoides_mccartyi_DCMB5|Pair_dcmb_1371|HisKA_322-385/dcmb_1371_RR_OmpR|Dehalococcoides_mccartyi_DCMB5|Pair_dcmb_1372|Response_reg_3-114	--IEFTRALVHELKTPLTPLMGASGALTDDTEPLISLARCIRKSSESLNKRIQELLDFSKGE--IILIEDQEDVVEYMSIALRWPDI-EIQSTASGQEGIDLAAKGTADLITLDLGLSDVSGFEVLKAIRLFS-QVPIIIITVRSDEIDIVKGLDLGAQEYIVKPFGQMEFLARI-
>dcmb_1377_HK_Classic|Dehalococcoides_mccartyi_DCMB5|Pair_dcmb_1378|HisKA_161-223/dcmb_1378_RR_OmpR|Dehalococcoides_mccartyi_DCMB5|Pair_dcmb_1377|Response_reg_4-115	-RTEFYKALVHELKTPLTPIVLNSEVLEDLEGESKKLANNINIASLELLTRINELYDMAKGE--ILIIEDDLKTADAFSSIFRLTWPAEIMVTSNGEQGIQKIEDRQPEIVILDIGLPDISGFDVIREVRRFT-DVPIIVITARTDELDVVKALELGANDFISKPPRKMELIARIK
>dcmb_1423_HK_Classic|Dehalococcoides_mccartyi_DCMB5|Pair_dcmb_1424|HisKA_203-266/dcmb_1424_RR_OmpR|Dehalococcoides_mccartyi_DCMB5|Pair_dcmb_1423|Response_reg_8-118	----FTLALIHELKSPLTPILSSSETLSRPDSLNAELARNIYHGAKSLNACISELLDLAKSE---LIIEDNEDIVQAVSLAFQIRWPSTIFSTASGEEGVLKVEDNNPSFVIVDLNLTDINGFEVIKEIRTFS-KVPVIVLSIKNSEADIVRALELGADDYILKPFHQLELTSRVN
>Q7A_121_HK_Classic|Methylophaga_sp._JAM1|Pair_Q7A_122|HisKA_200-265/Q7A_122_RR_OmpR|Methylophaga_sp._JAM1|Pair_Q7A_121|Response_reg_5-117	MRRDFVANVSHELRTPLTVLRGYLETLTTDQELWQQALPIMQQQSQRMHLMIKDLLALSQLETGVLLVEDDAAIRDMINFSLRQAGF-TCEAVKDGETGLDWLKNQQPDMILLDWMLPGIDGIEFIRRLRANEASIPVIMLTAKGESEDMVKGLSVGADDYINKPFSPPELIARIK
>Q7A_254_HK_Classic|Methylophaga_sp._JAM1|Pair_Q7A_255|HisKA_494-562/Q7A_255_RR_PrrA|Methylophaga_sp._JAM1|Pair_Q7A_254|Response_reg_8-118	-WGEVARRLAHEIKNPLTPIQLSAERLQHQTETLQKLTDTIVQQVEAMKDMVNEFSDYARS---ILVVDDEPDIRELIKDILEDEAY-RVVTASNGEEARLVFNQNQPQLVLLDIWMPDVDGITLLKEFKQQNKSVTIVMMSGHGTIETAVEATRSGANDFIEKPLSMAKLLRAV-
>Q7A_401_HK_Classic|Methylophaga_sp._JAM1|Pair_Q7A_402|HisKA_269-330/Q7A_402_RR_NtrC|Methylophaga_sp._JAM1|Pair_Q7A_401|Response_reg_11-124	ALGQLSAGVAHELGAPLTVVDGRASRLLRENENDVKELNEIRQQAARMTSIIQQLLSFGRS---ILLIEDDQALARLISDELEAEGW-NLEIHHQLQSALDWLNINQPALIVTDLRLPDGNGMQVVEQVVTHWQRPGLIVITAFGSVRQAVQALQAGADDFLTKPLDLEHFLLAV-
>Q7A_626_HK_Classic|Methylophaga_sp._JAM1|Pair_Q7A_627|HisKA_271-329/Q7A_627_RR_NtrC|Methylophaga_sp._JAM1|Pair_Q7A_626|Response_reg_5-117	ALGELVPLVAHNIRNPLAGIRAAAQVIEEANEESRAVLKDIIVAVDRLENWVTSLLM--------LLIEDERLFAKSVKRRLEREGY-KVNIADTITNGVVLLNNEPPDVLLLDVRLPDGNGLDVLNAIRVDGQNLPVIMMTAYGELEDAVNAMKSGASDYLKKPVDLDELMLTI-
>Q7A_707_HK_Classic|Methylophaga_sp._JAM1|Pair_Q7A_706|HisKA_217-279/Q7A_706_RR_OmpR|Methylophaga_sp._JAM1|Pair_Q7A_707|Response_reg_8-119	---MFIKTASHELRTPIAILSGALDVIKRLSAADKQTMRRIRQTVNHMQIEVNTLLALLRNEQ-ILIVEDQVALAENLFEFFEDTHY-ELDFAADGLTALHLLATNDYDVIVLDIMLPGLSGYEICRRVRQDLKNTPIIMVTAKGTLPDKEEGFGVGADDYLVKPFDLRELQLRI-
>Q7A_1292_HK_Classic|Methylophaga_sp._JAM1|Pair_Q7A_1293|HisKA_135-191/Q7A_1293_RR_NtrC|Methylophaga_sp._JAM1|Pair_Q7A_1292|Response_reg_9-120	-QQQVVRGLAHEIKNPLGGLRGAAQLLERASDDLKEYTRIIINEADRLQNLMTRML----------IVDDDRSIRWVLQKALEAVDI-TVKAFESGDLVLEQLKRGTPDVLVSDIRMPGLDGLQLLAEIQRKQPDLPVIIMTAYSDLDSAVSVYEGGAFEYLPKPFDVDEAVDLV-
>Q7A_1310_HK_Classic|Methylophaga_sp._JAM1|Pair_Q7A_1311|HisKA_228-296/Q7A_1311_RR_OmpR|Methylophaga_sp._JAM1|Pair_Q7A_1310|Response_reg_4-114	--HRFLRYTSHELRTPISVIRNNIELQYKLNPMHKDIVDRINRASLTMQHLTETLLWLSREDN-VLLIEDDLDLAQTVMDYLQLEAI-SCDHASNGAAGLNLLQQNYYDVLLLDLNLPRIDGLTVCERLRHEGSDIPVLMLTARDQLTDKQAGFTAGTDDYLVKPFELKELVMRI-
>Q7A_1361_HK_Classic|Methylophaga_sp._JAM1|Pair_Q7A_1362|HisKA_312-377/Q7A_1362_RR_PrrA|Methylophaga_sp._JAM1|Pair_Q7A_1361|Response_reg_6-115	SLGRLTASIAHEIRNPLSAISHASELLAEGDASVSKLTEIIQRHSVRMDNIIETILEMSRRK---LIVDDEPDILDLLSMTLSGMSI-DCVTAESIAEAERLLAQQSFDLCFTDMRLPDGDGLELVKKIQTSYPELPIAVVTAYGNMDLAITALKSGAFDFVSKPLKLRVLRELV-
>Q7A_1373_HK_Classic|Methylophaga_sp._JAM1|Pair_Q7A_1372|HisKA_230-291/Q7A_1372_RR_OmpR|Methylophaga_sp._JAM1|Pair_Q7A_1373|Response_reg_11-120	-QRHLTSDLSHELRTPLTRVELALSIAEQ-SNPNDESLQRIRHECLQMRELVEDALTLAWLEN-ILIIEDDLVLNHQLKQLLENQSF-VVCQCFNGEQGLLTAVSNHFDLILLDISLPQRDGYSVLNTLRKTR-QTPVIILTAHGAEEERILGFKNGADDYLPKPFNFTELVLRI-
>Q7A_1585_HK_Classic|Methylophaga_sp._JAM1|Pair_Q7A_1584|HisKA_237-297/Q7A_1584_RR_OmpR|Methylophaga_sp._JAM1|Pair_Q7A_1585|Response_reg_3-112	--RRFTGDVAHELRTPLAGIKTQLQVARLQGGKAMHALVQAEKATDRLQRTLDQLLLLARVEG-VLIVEDDALMGEGIQAGLTALGI-QAEWVVNAGGAETAMATASFDAVILDLGLPDQDGMHLLSRWREHGNNLPVLILTARDAVPDRVSGLQAGADDYMSKPFDLTELAARL-
>Q7A_1771_HK_Classic|Methylophaga_sp._JAM1|Pair_Q7A_1770|HisKA_284-351/Q7A_1770_RR_OmpR|Methylophaga_sp._JAM1|Pair_Q7A_1771|Response_reg_4-113	--ATLLSSVSHDLRTPLSSIIGASSSLRESTDDQQLLIQTIEDEAHRLDRHIQNLLDMTRLSQGILLIEDEVQIKKFLRISLEAHHH-KVLEARLGEQGLAIMVEQQVDLLIVDLGLPDMDGQDVIKALRKWS-QIPIIVLSVRSSEDEKVQALDAGANDYVTKPFGISELMARVR
>Q7A_1811_HK_Classic|Methylophaga_sp._JAM1|Pair_Q7A_1812|HisKA_228-294/Q7A_1812_RR_OmpR|Methylophaga_sp._JAM1|Pair_Q7A_1811|Response_reg_3-113	-LSHFSADIAHELRTPLTNLIIQTQVLGKTLEEYRELLYSNLEEQERLAKMINDILWLAKSDHG-LLVEDEVKTGDYLQKGLSEAGF-QVNLVRNGLDGHHLAMTEAFDLIVLDVMLPDVDGWRILQSLREAECQTPVLFLTARDTVDDRVKGLELGADDYLVKPFAFAELLARIR
>Q7A_1957_HK_Classic|Methylophaga_sp._JAM1|Pair_Q7A_1956|HisKA_246-308/Q7A_1956_RR_OmpR|Methylophaga_sp._JAM1|Pair_Q7A_1957|Response_reg_3-113	--KRFIIDASHELRTPLSILQLHAQNLNSTEQEKQQAISAIDTGSKRMVHLVNQLLAMARIEQ-ILLIEDDQLLALGIITALKRMGY-QLEHCTTGLHAKQAVLNGEFALMILDLGLPDGSAVPLIKSIRKNGHSLPILVLTAQDQIEIKLAALNNGADDYLVKPTDVREIEARI-
>Q7A_1979_HK_Classic|Methylophaga_sp._JAM1|Pair_Q7A_1980|HisKA_220-277/Q7A_1980_RR_OmpR|Methylophaga_sp._JAM1|Pair_Q7A_1979|Response_reg_3-113	--QRFAADAAHELRTPISALQIHLHNLRQY-GVNTEDWQLMQAAVDRMGHLVNQILMLYR----ILLIEDDLSLAQGLMRSLRHDRF-TVNHLSLGRQAINSIKTAAPDIVILDLGLPDMDGTAVLAEIRKVNASLPILVLTARGSINDRVIGLDAGADDYLAKPFDIDELLARL-
>Q7A_2374_HK_Classic|Methylophaga_sp._JAM1|Pair_Q7A_2373|HisKA_162-226/Q7A_2373_RR_NtrC|Methylophaga_sp._JAM1|Pair_Q7A_2374|Response_reg_6-116	-MGEMAARLAHQIRTPLSSATLYLAPLLKETEQTTQFARRLHDSLSHMEQLVRNMLAFSRGD--IMVVEDDANLRTALCDTLELAGY-KVTSTDHGQKALDKLANEPIGLLLSDLQMQPMDGHTLLKKARAMLPSLPVVLMTAYGSVQSAVEAMHEGACDYLMKPFEADDLLQRVQ
>Q7A_2721_HK_Classic|Methylophaga_sp._JAM1|Pair_Q7A_2722|HisKA_212-274/Q7A_2722_RR_OmpR|Methylophaga_sp._JAM1|Pair_Q7A_2721|Response_reg_3-114	--RSFTAAASHELRTPLTVMMGALDVLSAHSPASQRALERINRACTEMLAFIEATLLLSREES-VLVIEDNRDIAANIADYLEPKGH-VLDFATTGPHGLKLALSERYDVIVLDIMLPGLNGMEVCRRLRNEGNDVPVLMLTARDQLDDKLEGFQAGADDYLVKPFSVKELEVRL-
>Q7A_2907_HK_Classic|Methylophaga_sp._JAM1|Pair_Q7A_2906|HisKA_229-292/Q7A_2906_RR_OmpR|Methylophaga_sp._JAM1|Pair_Q7A_2907|Response_reg_4-113	-QKRLLHDVSHELRSPLARMQAAIGLAQQSPDKTAKMLDRVERESERIDHLIGELLNLSRLEN-VLIIDDDVILSGLFQDYLEEEKF-QVRTADTATEGLQLALQGEFDIVILDVMLPDMSGTEVLKAIRQQS-HVPILMFTAKGDDVDRIMGLESGADDYVPKPCTPRELIARIK
>COB47_0067_HK_Classic|Caldicellulosiruptor_obsidiansis_OB47|Pair_COB47_0066|HisKA_342-407/COB47_0066_RR_OmpR|Caldicellulosiruptor_obsidiansis_OB47|Pair_COB47_0067|Response_reg_6-115	MRKQFVADVSHELRTPITTIKTYSETLLDDETVKREFLSVIIKECDRMTRLITDLLYLSRLDSGILVVDDEKPIVDIIKFNLEKEGY-KVTTSYDGEDALNRIKSGNFDMVLLDVMLPKIDGFSVCKKVREFS-DVPIIMITAKADEVDKVLGLELGADDYITKPFGIRELIARIR
>COB47_0245_HK_Classic|Caldicellulosiruptor_obsidiansis_OB47|Pair_COB47_0246|HisKA_237-302/COB47_0246_RR_OmpR|Caldicellulosiruptor_obsidiansis_OB47|Pair_COB47_0245|Response_reg_3-112	-RRDFIANTTHELRTPLSIIKSYAEAIYDNKDQIKEYAYSIMVEADHLNNLINEILELSKLQSGILLIEDEEKLRKIMKLYLEKEGF-EVEEASDGNEAIEKFQPSMYSVVILDVMLPQKDGWSVLREIRKKD-DTPVIMLTARGEDDDKIFGFELGADDYVVKPVSPKEIVARVK
>COB47_0269_HK_Classic|Caldicellulosiruptor_obsidiansis_OB47|Pair_COB47_0270|HisKA_237-301/COB47_0270_RR_OmpR|Caldicellulosiruptor_obsidiansis_OB47|Pair_COB47_0269|Response_reg_3-113	--RRFLSDASHELRTPLATIKALVEELERTKDRYHQQLHYIYREILKMNKIISQLFMLSRCEEGILIVEDQESLAHTIARRLQEVGY-STDITFDGQEGLHFATSTSYDLIILDIMLPKIDGINLLKLIRLKGIQTPVLCLTAKDSIEDRVIGLDAGADDYLVKPFSFDELLARIR
>COB47_0834_HK_Classic|Caldicellulosiruptor_obsidiansis_OB47|Pair_COB47_0833|HisKA_237-302/COB47_0833_RR_OmpR|Caldicellulosiruptor_obsidiansis_OB47|Pair_COB47_0834|Response_reg_6-115	-QIRFLQNISHELKTPLTSVRGYAEMLKEDKSKMESAADKIIWHVDRLKSLINQIIDLTKIES-VYVVDDEKDILELVSEYLTQKGY-AVRTFESGESFLGEFEKSEPDIVILDIMLPDIDGYEICKRIRKNS-DVPIIMLSAKGEELDKVLGLELGSDDYISKPFSLSELEARIK
>COB47_1068_HK_Classic|Caldicellulosiruptor_obsidiansis_OB47|Pair_COB47_1067|HisKA_346-411/COB47_1067_RR_OmpR|Caldicellulosiruptor_obsidiansis_OB47|Pair_COB47_1068|Response_reg_4-116	-RSDFVANVSHELKTPLTSIKGFVETLKDDKDVALKFLNIIEVEVERLVRLINDLLYLSEIEN-ILIVDDEQHILELLKFNLRKEGY-NTFEADSGVQALEILKNNKVDLVILDIMMSDKDGYEVLKEIRFNRKNLPVILLSAKSEEIDKILGLELGADDYITKPFSVKELVVRV-
>COB47_1099_HK_Classic|Caldicellulosiruptor_obsidiansis_OB47|Pair_COB47_1098|HisKA_246-310/COB47_1098_RR_OmpR|Caldicellulosiruptor_obsidiansis_OB47|Pair_COB47_1099|Response_reg_3-112	-RKSFISNVSHELRSPLTSIRGFVEGILDPDDKRDFYLTLVKEEVIKLNNLINQLLELSRLE--ILVIDDDIKICEVIKLYLEKEGF-EVVVTHNGMDGISVFKNEMPDLVILDIMLPKKDGYEVCRELRKIS-NIPIIMLTAKGETFDKVLGLELGADDYIVKPFDPKELIARIK
>SbBS512_E1795_HK_Classic|Shigella_boydii_CDC_3083-94|Pair_SbBS512_E1794|HisKA_211-269/SbBS512_E1794_RR_OmpR|Shigella_boydii_CDC_3083-94|Pair_SbBS512_E1795|Response_reg_7-113	SKKQLIDGIAHELRTPLVRLCYRLEMSD---NLSAAESQALNRDISQLEALIEELLTYARLDR-IVFVEDDAEVGSLIAAYLAKHDM-QVTVEPRGDQAEETILRENPDLVLLDIMLPGKDGMTICRDLRAKW-SGPIVLLTSLDSDMNHILALEMGACDYILKTMPPAVLLARL-
>SbBS512_E3460_HK_Classic|Shigella_boydii_CDC_3083-94|Pair_SbBS512_E3459|HisKA_238-301/SbBS512_E3459_RR_OmpR|Shigella_boydii_CDC_3083-94|Pair_SbBS512_E3460|Response_reg_3-113	--RRFTSDAAHELRSPLTALKVQTEVAQLDPQARKKALLQLHSGIDRATRLVDQLLTLSRLDS-ILLIEDDMLIGDGIKTGLSKMGF-SVDWFTQGRQGKEALYSAPYDAVILDLTLPGMDGRDILREWREKGQREPVLILTARDALAERVEGLRQGADDYLCKPFALIEVAARL-
>SbBS512_E4345_HK_Classic|Shigella_boydii_CDC_3083-94|Pair_SbBS512_E4344|HisKA_131-186/SbBS512_E4344_RR_NtrC|Shigella_boydii_CDC_3083-94|Pair_SbBS512_E4345|Response_reg_8-116	--RDLVRGLAHEIKNPLGCLRGAAQLLSKPDPSLLEYTKVIIEQADRLRNLVDRLL--------VWVVDDDSSIRWVLERALAGAGL-TCTTFENGAEVLEALASKTPDVLLSDIRMPGMDGLALLKQIKQRHPMLPVIIMTAHSDLDAAVSAYQQGAFDYLPKPFDIDEAVALV-
>SbBS512_E4947_HK_Classic|Shigella_boydii_CDC_3083-94|Pair_SbBS512_E4946|HisKA_257-319/SbBS512_E4946_RR_OmpR|Shigella_boydii_CDC_3083-94|Pair_SbBS512_E4947|Response_reg_1-108	----YVYALTHELKSPLAAIRGAAEILREPPEVVARFTDNILTQNARMQALVETLLRQARLEN----VEDEQGIADTLVYMLQQEGF-AVEVFERGLPVLDKARQLVPDVMILDVGLPDISGFELCSQLLALHPALPVLFLTARSEEVERLLGLEIGADDYVAKPFSPREVCARV-
>BCGMEX_0502_HK_Classic|Mycobacterium_bovis_BCG_str._Mexico|Pair_BCGMEX_0503|HisKA_157-221/BCGMEX_0503_RR_OmpR|Mycobacterium_bovis_BCG_str._Mexico|Pair_BCGMEX_0502|Response_reg_4-113	ARRDFVANVSHELKTPVGAMALLAEALLADSETVRRFAEKVLIEANRLGDMVAELIELSRLQG-VLIVEDEESLADPLTFLLRKEGF-EATVVTDGPAALAEFDRAGADIVLLDLMLPGMSGTDVCKQLRARS-SVPVIMVTARDSEIDKVVGLELGADDYVTKPYSARELIARIR
>RATSFB_0210_HK_Classic|Candidatus_Arthromitus_sp._SFB-rat-Yit|Pair_RATSFB_0209|HisKA_253-314/RATSFB_0209_RR_OmpR|Candidatus_Arthromitus_sp._SFB-rat-Yit|Pair_RATSFB_0210|Response_reg_5-116	-KNEFISTVSHELRTPLTSIKGWAITLQYNDPDLLNGLKIIEGETERLSSMVEELLDFSK----ILLVENEVSIRQFLKINFDREGF-HVIEADRGDTAIEIALLEKPQVVLLDVGLEGMDGFQVCSNLRKHFPKMGIIMLTARSQEMERVMGLEFGADDYVVKPFNPLEVMLRV-
>RATSFB_0298_HK_Classic|Candidatus_Arthromitus_sp._SFB-rat-Yit|Pair_RATSFB_0297|HisKA_200-258/RATSFB_0297_RR_OmpR|Candidatus_Arthromitus_sp._SFB-rat-Yit|Pair_RATSFB_0298|Response_reg_3-113	----FITNAGHEIKTPLAIILANTEVMEMF-NGENEWTKSTINQVKRLDGLVKRLLSLSKMDE-ILLAEDEKELSNAIVAILKHNYY-SVDCVYNGEDALDWILNDEYDLIILDIMMPKIDGLNVLKILREKNVDVPVLILTAKGEIDDRVIGLDLGADDYMCKPFDIKEFLARV-
>RATSFB_0679_HK_Classic|Candidatus_Arthromitus_sp._SFB-rat-Yit|Pair_RATSFB_0680|HisKA_190-253/RATSFB_0680_RR_OmpR|Candidatus_Arthromitus_sp._SFB-rat-Yit|Pair_RATSFB_0679|Response_reg_5-117	--TEFISNITHELKTPLTSIIGFADTLKNENENDRQFYDIISKEAIRLNNLISDILIFSEIQT-ILIVEDEFNIVELLRYNLTKNGF-DVKYVLDGLDIINIVTEFKPELILLDLMLTGKDGFEICSELSNNEKKIPIIIVSSKSREFDKVLALNLGADDYICKPFSINEIVARIK
>RATSFB_0976_HK_Classic|Candidatus_Arthromitus_sp._SFB-rat-Yit|Pair_RATSFB_0977|HisKA_229-295/RATSFB_0977_RR_OmpR|Candidatus_Arthromitus_sp._SFB-rat-Yit|Pair_RATSFB_0976|Response_reg_4-113	-QKQFVHDASHELRTPLTILKGHLQMLNRDPETLDKSLKIASEELERLIKLVNDLLNLNKMET-ILVIEDEKNIASFLKMELEYEGY-EVENSYDGKEGLEKALNTNFNLIILDLMIPYLNGLEVCRRIRKSK-NTPIIMLTARDSVMDKVSGFQMGADDYLVKPFAIEELLARIE
>RATSFB_1285_HK_Classic|Candidatus_Arthromitus_sp._SFB-rat-Yit|Pair_RATSFB_1286|HisKA_245-310/RATSFB_1286_RR_OmpR|Candidatus_Arthromitus_sp._SFB-rat-Yit|Pair_RATSFB_1285|Response_reg_8-117	-RREFLSNVSHELRTPLTTIIGFLSGILDSPENHIEKLTIVYDEVKRLSRLVNDLLDLNAIESGVLIVDDDVNILEVLKMYLGNSGY-DIRSCSDGREVQEIFPDYKPNLVILDIMMPILDGTEVLKWIRRDS-SVPIIMLTAKGELFDKCLALELGADDYMVKPFEPKELLARIK
>ABC0044_HK_Classic|Bacillus_clausii_KSM-K16|Pair_ABC0045|HisKA_275-340/ABC0045_RR_NtrC|Bacillus_clausii_KSM-K16|Pair_ABC0044|Response_reg_4-113	--GEMAAGVAHELNSPLTAILGNSQLILRNHDSLFPLLTDIKNCGDRCKRIINSLLTFSRQD--ILIIDDEVEVGNFLSHLFTSKGY-KVRVVNSKKEFDAIFDHHQFQGAMIDLKLPDANGLALLKHVKRRQPHCKVIIMTGYSTIKTAVEAMKLGASDYIEKPFDDIDLLEK--
>ABC0389_HK_Classic|Bacillus_clausii_KSM-K16|Pair_ABC0390|HisKA_217-284/ABC0390_RR_OmpR|Bacillus_clausii_KSM-K16|Pair_ABC0389|Response_reg_4-114	-QDRFVSDASHELRTPLLVIQGYADLLERDIAIRQEAISSIKKEASYINKLVERLLLLAKSGQ-ILLIEDDAAIARYLELELKHEGF-ELIIENDGEGGLAKALLEKFDVILLDVMLPKISGIEVLRRLRKSKETTPVILLTAKGEVSDKVTGLDSGANDYMTKPFFIEELLARIR
>ABC0528_HK_Classic|Bacillus_clausii_KSM-K16|Pair_ABC0529|HisKA_215-280/ABC0529_RR_OmpR|Bacillus_clausii_KSM-K16|Pair_ABC0528|Response_reg_6-115	-RRFMIAAIAHDLRTPLFALRGYLDGLEQSPDKITKYVAVCKEKSRQLDRLVEDLFTFTTME--ILVVDDDQSIADLLRDFLENDHF-YVLTASNTEEAWEAFQQSAVDCLILDIMMPGENGFAFCRRIRAKS-DVPILFLSARSADVDKIRGLTLGGDDYIVKTASPGEIVARV-
>ABC1170_HK_Classic|Bacillus_clausii_KSM-K16|Pair_ABC1169|HisKA_85-152/ABC1169_RR_OmpR|Bacillus_clausii_KSM-K16|Pair_ABC1170|Response_reg_4-113	-QRKMLANISHDLKTPLTVMIAYIEKLELPEQERMRIIGRLHEKTEQVISQMNKFFALAKLEAGILLVEDDPEISDLVKAHLENEGY-RVLTAADGEEAARLFANGGVDLVLLDLMLPKMNGMTLLKQIRVHS-SVPILILSAKGSDLDKALGLGFGADDYIAKPFSLIELTARVQ
>ABC1176_HK_Classic|Bacillus_clausii_KSM-K16|Pair_ABC1177|HisKA_141-208/ABC1177_RR_OmpR|Bacillus_clausii_KSM-K16|Pair_ABC1176|Response_reg_6-115	SKDQLVVNLAHDLRTPLTSVLGYLDLLKDTKEQVRHYLTIAFTKSTHLERLIDELFEITKMN--ILIADDEEEIADLLAIHLEKEGY-SVAKAADGQEAIHIVETQPIDLLILDIMMPKMDGYEVTRRIRETH-NMPIIFLSAKTSDFDKVHGLVIGADDYITKPFTPIELVARVN
>ABC1206_HK_Classic|Bacillus_clausii_KSM-K16|Pair_ABC1207|HisKA_237-297/ABC1207_RR_OmpR|Bacillus_clausii_KSM-K16|Pair_ABC1206|Response_reg_4-112	AKGEQIGALAHDLKIPVTVIKGNAELLSLQQEEQSAYTHYILNAVHKIEQYISQLIHLSHTD--ILAVDDEQDILVLIQNILQRDGH-KVDTIAQPDKVA-LNAFAGYDLILLDVMMPHLNGFDLCEKIRPIV-DCPILFLTAKAEEAAVVEGFTSGGDDYISKPFSIRELSARVN
>ABC1524_HK_Classic|Bacillus_clausii_KSM-K16|Pair_ABC1523|HisKA_233-298/ABC1523_RR_OmpR|Bacillus_clausii_KSM-K16|Pair_ABC1524|Response_reg_6-114	-QKTFIQHASHELKTPIMVIKSYSQSVKDPKENLEQTMDVITEEANRMERRVIDMLYYTKLDQ-IYLVEDEANLSEVLKAYLQKEGW-NVTVFLDGNAAIEAVPDK-PHLWVLDIMLPGTDGYQVLKAIKEQE-DTPVIFISARDQDLDRVLGLEMGSDDYLAKPFLPQELIIRV-
>ABC1836_HK_Classic|Bacillus_clausii_KSM-K16|Pair_ABC1835|HisKA_369-435/ABC1835_RR_OmpR|Bacillus_clausii_KSM-K16|Pair_ABC1836|Response_reg_7-116	-RKDFIANVSHELRTPISMLQGYSEAMVDSDEERKEVAQIIYDESLRMGRLVNELLDLARMEAG-LVVDDEERIRRLLRMYLEREEY-QIEEASNGEEALELALAKEYDLILLDVMMPGMDGVEMCQELRKKK-ATPVMMLTAKGEEANRVQGFEVGADDYIVKPFSPREVVLRV-
>ABC1860_HK_Classic|Bacillus_clausii_KSM-K16|Pair_ABC1859|HisKA_243-301/ABC1859_RR_OmpR|Bacillus_clausii_KSM-K16|Pair_ABC1860|Response_reg_3-112	-RKKLIAAISHDLRTPLTSIRAYAEGMNAHPDKREEYSKVILAKTEYMQRLIEDLLIFSQV---ILLIEDDRSIATIVKEYLERESF-KVVWQADGESGYHAFCEGAYQLVLIDLMLPKMDGFALCEKIRASS-EVPIIVVSAKQTDFDKVQSFGLGADDYVTKPFSPLELTARV-
>ABC2710_HK_Classic|Bacillus_clausii_KSM-K16|Pair_ABC2711|HisKA_363-428/ABC2711_RR_OmpR|Bacillus_clausii_KSM-K16|Pair_ABC2710|Response_reg_5-115	-RKDFVANVSHELKTPVTSIKGFAETLLDDPVLSKQFTEIIWKESDRLQMLIVDLLELSKIEN-ILVVDDEPSISTLLQYNLEQAGF-EVETKLDGQAGFDRAKEADFDLIILDLMLPGMDGMDVCRQLRQEQIFVPILMLTAKDDEFDKVLGLELGADDYMTKPFSPREVTARV-
>ABC3228_HK_Classic|Bacillus_clausii_KSM-K16|Pair_ABC3227|HisKA_130-187/ABC3227_RR_OmpR|Bacillus_clausii_KSM-K16|Pair_ABC3228|Response_reg_4-113	---MFINQWVHHMKTPVSVISLLIQEGKQ-TLTDKEWLDDISAENDRFRHGLELMLHLARLDH-IYIVEDDQQIRRIMADHLERYGY-RVTWAENFETIKQEFVAIQPDLVLLDINLPLYDGFYWCRQIRTVS-NAPVLFISARTDDMNQVMAIENGGDDYITKPFHLEVLLAKV-
>ABC3552_HK_Classic|Bacillus_clausii_KSM-K16|Pair_ABC3553|HisKA_249-304/ABC3553_RR_OmpR|Bacillus_clausii_KSM-K16|Pair_ABC3552|Response_reg_4-113	-RSEFISSVSHDLKTPLTIMKANAQMLERKDEQHKTYIANMIGEIERTEKLVQEL---------ILIVDDEIQITSIVGELLQEEGY-QTTVANDGMNAIKLIKEQDFDLIILDIMMPYVNGLDVCRSVREFT-DVPILFVTARTSMNDQINGLNIGGDDYINKPFTHEQLLARIK
>ABC3642_HK_Classic|Bacillus_clausii_KSM-K16|Pair_ABC3641|HisKA_138-206/ABC3641_RR_OmpR|Bacillus_clausii_KSM-K16|Pair_ABC3642|Response_reg_6-116	AKQEWIAGISHDLKTPLTYITGYSTLLLTSTEEARSFTQEIYDKGKHMEELIQDLNL-------ILIVDDEIGIVKLLEITLEKENFIHIDKATTGKEALQLTKEKTFNLILLDIMLPDISGFELCTEIRRNT-DTPIIFVSSRATDFDKLTGLGIGGDDYITKPFNPLEVIARI-
>ABC4009_HK_Classic|Bacillus_clausii_KSM-K16|Pair_ABC4010|HisKA_242-303/ABC4010_RR_OmpR|Bacillus_clausii_KSM-K16|Pair_ABC4009|Response_reg_6-115	-RNAFLANVAHELRTPLSYMIGYAEGIQEV-IERNKGMAVIEKEAKRLDRLVNDLLDLAQLEG-VLVVDDEPELLELVVTYLRKESY-RALTADNGADALKRIEQDAVDLVILDVMMEGMDGFHVCERIRQKH-SLPVIMLTARGNEADKVRGLKTGADDYMVKPFSPKELMARVE
>ABC4098_HK_Classic|Bacillus_clausii_KSM-K16|Pair_ABC4099|HisKA_381-448/ABC4099_RR_OmpR|Bacillus_clausii_KSM-K16|Pair_ABC4098|Response_reg_5-114	-RREFVANVSHELRTPLTTMKSYLEALADDEDIAPRFLEVTQKETDRMIRLVNDLLQLSKIDS-ILVVDDEKSIADILKFNLEKEGF-DVTCAYDGNEALERVKERKPDLMLLDIMLPYKDGMEVCREVRKQY-DLPIIMLTAKDSEIDKVLGLELGADDYVIKPFSTRELLARVK
>RAF_ORF0551_HK_Classic|Rickettsia_africae_ESF-5|Pair_RAF_ORF0552|HisKA_272-329/RAF_ORF0552_RR_OmpR|Rickettsia_africae_ESF-5|Pair_RAF_ORF0551|Response_reg_8-118	-KTTMLAMISHDLRTPLTRMKLQLELMEE-----SEEIEGLKQDILTMQQMINSYLDFAKGES-ILIVDDDSRILALLKQFLNKNAF-LVSTTSSVIEAKNLLKTSNYDLIILDVMLPEITGLDFATTIRDAGNNIPIVMLTALSEADDRVKGLEAGASDYITKPFEPRELLLRI-
>EGYY_02400_HK_Classic|Eggerthella_sp._YY7918|Pair_EGYY_02390|HisKA_220-287/EGYY_02390_RR_OmpR|Eggerthella_sp._YY7918|Pair_EGYY_02400|Response_reg_3-112	-QTEFVQNASHELRTPLAVMQTTSELLLDRIVDRFEDVNVITSETKRLSHLVDDLMALSLDDAG-LIVEDDRLLSNALARTLA-DTY-DINQAFDGEEGLFYAAQDVYDLVVLDVMLPQRDGFSVLEALRAREVNTPVLMLTAKGTTADKLRGLRAGADDYLTKPFDRDELLARIE
>EGYY_03250_HK_Classic|Eggerthella_sp._YY7918|Pair_EGYY_03260|HisKA_94-160/EGYY_03260_RR_OmpR|Eggerthella_sp._YY7918|Pair_EGYY_03250|Response_reg_8-117	--AAFISDVAHELRTPLTAIRGNAEMLADPPDMHEKFCSIIIDESERLSRLTNDLLTLQRIED-ILVVDDEPSITEFVSYALKKEGF-YTDVVDNGEDALELATKNPYDLFVLDIMLPGMDGYELCRRLRSKT-SVPVLFLSARDTELDKVVGLEIGGDDYLAKPFGVRELIARVR
>EGYY_03880_HK_Classic|Eggerthella_sp._YY7918|Pair_EGYY_03870|HisKA_310-371/EGYY_03870_RR_OmpR|Eggerthella_sp._YY7918|Pair_EGYY_03880|Response_reg_8-117	--RRLTTDVAHELRTPLMAIQSTVEAMVDVFEADEERLETVNSEVQRLSRLVDAILKLSRLEN-ILLVEDEKAIRDAVTAYLERENY-WVTAVGDGQEALEEFSKHHFDLVILDLMLPRVPGERVCRAIRDNS-DVPIIMLTAKGEVEDRIIGLELGADDYLVKPFSPRELVARA-
>EGYY_06090_HK_Classic|Eggerthella_sp._YY7918|Pair_EGYY_06080|HisKA_684-751/EGYY_06080_RR_OmpR|Eggerthella_sp._YY7918|Pair_EGYY_06090|Response_reg_7-116	-RSNLLRTISHDLRTPLTSISGDADMLLDERAQRERLYRDIHDDAQWLIALVENLLSITRIENGILVVEDDTAVRRLVVTTLDVHGY-AVREAKTVAQALLELSSQPPDLAILDLGLPDGDGVDVIRTLREWS-SLPVIVLSARLEDADKVAALDAGADDYLVKPFSVEELLARL-
>EGYY_06620_HK_Classic|Eggerthella_sp._YY7918|Pair_EGYY_06610|HisKA_153-216/EGYY_06610_RR_OmpR|Eggerthella_sp._YY7918|Pair_EGYY_06620|Response_reg_16-125	-KNELVAYLAHDIKTPLTSVLGYLSLLREPRAARQEYADIAYAKAERLEGLVDEFFEITR----ILIVDDEKAIADLVGKLLAAEGM-DVRACYSGERALELFERERFDLAILDIMMPGLDGFEVCQRIRTVS-DLPVIFLSAKDEEVDKVVGLTLGADDYVTKPFKSRELVARVK
>EGYY_10130_HK_Classic|Eggerthella_sp._YY7918|Pair_EGYY_10140|HisKA_323-389/EGYY_10140_RR_OmpR|Eggerthella_sp._YY7918|Pair_EGYY_10130|Response_reg_8-118	-KSDFLAMMSHELRTPLTSIIAFTEFLNRHDEREAETRREIEANSRALLLMINDILEMSRLDAGIMLIDDDESLHVLIHRIAEEAGY-DFCSAFDGEQGLAVLAAEKPDLLLLDVMMPGMNGFDVCLRMREEGRRIPIIFLSAKGDIVDKSIGFKAGGDDYVVKPFSSDELLLRI-
>EGYY_16760_HK_Classic|Eggerthella_sp._YY7918|Pair_EGYY_16770|HisKA_129-175/EGYY_16770_RR_OmpR|Eggerthella_sp._YY7918|Pair_EGYY_16760|Response_reg_4-113	----------HEIKTPIAAAHLMAASLHG------PEASKLKGELDRIESYVEQALYYAR----IYLVEDDASLRDELARLLELQGY-AVTTATSFDWIVGEVIAAQPECVILDLKLPGTDGHTICRNLRRES-DVPIIMLTSSDNEFDEVMSMNLGADDYVTKPYNPAVLLAHI-
>EGYY_18900_HK_Classic|Eggerthella_sp._YY7918|Pair_EGYY_18890|HisKA_245-309/EGYY_18890_RR_OmpR|Eggerthella_sp._YY7918|Pair_EGYY_18900|Response_reg_18-136	-RANWIRGISHDIRTPLSMILGYADSIASTGEEARANAQVIRTQGLKIKDLVTDLNTASKLD--IFIVDDERELASMVATILHGAGFTCVDVAHSGTEALTAVDERAFQLFVLDVMMPHMDGFELLTHLRERPAGVPVVFLTAKDEPFDRVSGLSLGADDYIAKPFLPQELVLRI-
>EGYY_21460_HK_Classic|Eggerthella_sp._YY7918|Pair_EGYY_21450|HisKA_442-506/EGYY_21450_RR_OmpR|Eggerthella_sp._YY7918|Pair_EGYY_21460|Response_reg_7-116	-KSRLYADVSHEMKTPLTVIAANAQFAAQVDRETVVDLHAISAEAKRLGQMVTSLVQLNRT---ILLVEDDLDVLRTNRRILEREGY-TVLCADTLQAARACLGNGRPDALVIDILMPDGSGLDFCTEIRAAT-PAPILFLTALDEKSEIIEGLVAGGSDYITKPYDVDEFLARV-
>EGYY_22070_HK_Classic|Eggerthella_sp._YY7918|Pair_EGYY_22060|HisKA_252-316/EGYY_22060_RR_OmpR|Eggerthella_sp._YY7918|Pair_EGYY_22070|Response_reg_4-111	-RREQVAALAHDLKTPLTVVRGNLDVVLELPDEERACAVDAAASAARMGEYVRKLIDVSNGDA-ILAVDDDRAILTMLGRILTKDGH-DLTTTDDPA-RVEALDLGRFDLIVLDVMMPEMDGFELCRRIRDKV-DAPIAFLTAKSAEEDAVYGLGLGADDYVRKPFGAAELRAKV-
>EGYY_27720_HK_Classic|Eggerthella_sp._YY7918|Pair_EGYY_27730|HisKA_237-302/EGYY_27730_RR_OmpR|Eggerthella_sp._YY7918|Pair_EGYY_27720|Response_reg_5-114	MRRDFSSNVSHEMKTPLQVISGYAELMKNQPADRQKFAGLIYDEAQAMRSLINDVLTLSKLDE--YYVEDDTNIRDLTVYALKQAGF-EAQGFPAAGEFFAACKQQLPDLVLLDIMLPEIDGLEILHMLREDAKHVPVMMLTAKGTEFDTVSGLDAGADDYLAKPFGMMELVSRVN
>BT0764_HK_Classic|Borrelia_turicatae_91E135|Pair_BT0763|HisKA_154-218/BT0763_RR_NtrC|Borrelia_turicatae_91E135|Pair_BT0764|Response_reg_4-114	---RHARNIAHEIKNPLGAIDINLQLLKKKSTKANNYFKIIKEEINRMDKTVTDFLL--------LVADDEKNIREGIATYLEEEGY-FVFTASDGKEALETIKNEKIDAIISDLRMPQISGEELLKIVKDKNPNIPFIILTAHGTVDSAVDAMREGAYDFLTKPVDLERLLLII-
>BARCL_0060_HK_Classic|Bartonella_clarridgeiae_73|Pair_BARCL_0061|HisKA_354-419/BARCL_0061_RR_OmpR|Bartonella_clarridgeiae_73|Pair_BARCL_0060|Response_reg_11-120	--ERFAADVSHELKNPLTSLRSAVETLTKNKAQQTQLLEIIQHDVHRLDRLITDISDASRLDA-IVLVDDDSNILTSLSFALETEGY-RVESYTDGSAALKNLTVNPPHLAIFDIKMPRMDGMELLRRLRQKS-DIPVIFLTSKDDEIDELFGLKMGADDFITKPFSQRLLIERVK
>BARCL_0329_HK_Classic|Bartonella_clarridgeiae_73|Pair_BARCL_0330|HisKA_243-299/BARCL_0330_RR_OmpR|Bartonella_clarridgeiae_73|Pair_BARCL_0329|Response_reg_15-124	-RTMMLSGVSHDLRTILTRFKLQLALVSND-------INPLEQDVSDMQ----------------LVIDDDTRIRNLLSQFLIKNGF-RVSVSANADEAKRQLKSLDFDLLIVDVMMPGENGIDLTHSLRQTK-NVSILMLTALSEIDNRIHGLEAGADDYLAKPFDPRELLLRI-
>BARCL_0385_HK_Classic|Bartonella_clarridgeiae_73|Pair_BARCL_0384|HisKA_262-317/BARCL_0384_RR_OmpR|Bartonella_clarridgeiae_73|Pair_BARCL_0385|Response_reg_3-113	----QVGNLAHSLKTPLSVIINEVDNMTGQALLLREQTKIMHSQIN------------------ILIVEDDRDLNHQLAKAVKDAGY-VSDSAFNGEDGYFLGSTEPYDAVILDIGLSRMDGIQVVERWRKEGYSMPILMLTARDRWSDKVRGIDAGADDYVVKPFHLEEVMARL-
>BARCL_0394_HK_Classic|Bartonella_clarridgeiae_73|Pair_BARCL_0393|HisKA_244-309/BARCL_0393_RR_OmpR|Bartonella_clarridgeiae_73|Pair_BARCL_0394|Response_reg_3-113	--RQVSDNIAHDLKTPLTRLRNRAEEAKKTEFEYRQVLDDVIAESDYLIRTFSAILMISRIEAGILIIEDDRETGRYLEKAFLEAGH-AADIAYDGDTGYTLAETIDYDVMVVDRMLPHRDGLSIVAGLRAKGNETPVLILSALSQVDDRITGLRAGGDDYLTKPYAFSELLARV-
>BARCL_0602_HK_Classic|Bartonella_clarridgeiae_73|Pair_BARCL_0603|HisKA_509-577/BARCL_0603_RR_NtrC|Bartonella_clarridgeiae_73|Pair_BARCL_0602|Response_reg_5-113	----IARRIAHEIKNPLTPIQLSAERIRRDREVFDQCIDTIVRQVGDIGCMVDEFSSFARM---ILIVDDEADIRELVAGILDDEGY-ETRMACNSDEALAQISERIPKLIFLDIWLQGLDGLALLDEIKVRYPSLPVVMISGHGNIETAVSAIKRGAYDFIEKPFKASRLL----
>VSAL_II0198_HK_Classic|Aliivibrio_salmonicida_LFI1238|Pair_VSAL_II0197|HisKA_227-292/VSAL_II0197_RR_OmpR|Aliivibrio_salmonicida_LFI1238|Pair_VSAL_II0198|Response_reg_3-113	-LSDFSSDIAHELKTPLSNIVTQTQVTLSSTQDYQDILSSNLEELERINKTINDTLYLAKSEN--LIIEDETKAGDYLKKGLTESGY-TVDLSRDGVDGLYNATTYQYDLIILDVMLPKLNGWQILQTLRNCENSTPIIMLTAKDQVDDRVKGFELGANDYLIKPFAFAELKARIE
>VSAL_II0355_HK_Classic|Aliivibrio_salmonicida_LFI1238|Pair_VSAL_II0354|HisKA_251-314/VSAL_II0354_RR_OmpR|Aliivibrio_salmonicida_LFI1238|Pair_VSAL_II0355|Response_reg_3-113	--KRLSSDIAHELKTPIAELISLSEMNIRDIRISATYKEDVLSISNNMKNIVNQLMMLNQSG--ILLIEDSEHLRRSLVVGLSNLGF-TIDETGDGSKGLSMAITNDYDFIILDLMLPNVDGITLLKSIRKMGNDVKVIILSAKSLPEDRVEGLLSGADDYLVKPFSFDELHARI-
>VSAL_II0651_HK_Classic|Aliivibrio_salmonicida_LFI1238|Pair_VSAL_II0650|HisKA_282-338/VSAL_II0650_RR_OmpR|Aliivibrio_salmonicida_LFI1238|Pair_VSAL_II0651|Response_reg_4-94	----VLQILTHELRTPIASLALTVEGFRRLPESLYDEFRRLCEDSRRLRQLAE----------------------------LEEAGY-NCIHSDNATDVSSFWAEA--DIVILDRQLPEGDSLTWLPEWKQIK-DIPVILLTALVSIRDKVTGLDSGANDYLTKPFAEAELLARL-
>VSAL_I2311_HK_Classic|Aliivibrio_salmonicida_LFI1238|Pair_VSAL_I2310|HisKA_125-187/VSAL_I2310_RR_NtrC|Aliivibrio_salmonicida_LFI1238|Pair_VSAL_I2311|Response_reg_6-115	SLGKMVASLAHQVRTPLSSAMLYASNLGSPAATHKRFQTKLVDRLHDLEKQVNDMLLFAKGG--VLIVEDDEGLREALIDTLELAGY-EWVEADSAETALLILKKEPVDIVVSDVQMAGMGGLALLRSIKLNWPNLPVLLMTAYANIEDAVSAMKDGAIDYMAKPFAPEVLLNMV-
>VSAL_I2456_HK_Classic|Aliivibrio_salmonicida_LFI1238|Pair_VSAL_I2457|HisKA_205-271/VSAL_I2457_RR_OmpR|Aliivibrio_salmonicida_LFI1238|Pair_VSAL_I2456|Response_reg_5-117	MRRNFFANVSHELRTPMTVLRGYLEMSEDVGPMWNRAHGVMTEQLTRMEGLVEQLLTLSKIEA-ILVVEDEAPIREMLCFVLEQKGY-EPIEAEDYDTALALLCEPYPDLILLDWMLPGGSGINLIKHLKRDEKKIPVVMLTARGEEEDKVRGLEVGADDYITKPFSPKELMARL-
>VSAL_I2798_HK_Classic|Aliivibrio_salmonicida_LFI1238|Pair_VSAL_I2797|HisKA_247-306/VSAL_I2797_RR_OmpR|Aliivibrio_salmonicida_LFI1238|Pair_VSAL_I2798|Response_reg_4-112	-QQRLLSDISHELRSPLTRLRMATALATRK-QGESSELSRIDMEAERLEQMISELLELSRIQ--ILLVDDDVELTALLKDILNLEGY-TVVEANNGIEGLNAITDD-LDLILLDIMMPKMNGMDMLRKLRETN-ETPVLMLTAKGEEIDRVIGLELGADDYLPKPFSDRELLARIR
>lse_0710_HK_Classic|Listeria_seeligeri_serovar_1/2b_str._SLCC3954|Pair_lse_0709|HisKA_238-304/lse_0709_RR_OmpR|Listeria_seeligeri_serovar_1/2b_str._SLCC3954|Pair_lse_0710|Response_reg_4-114	ARQEFVANVSHELQSPLTSMQGFATLLASTEKERAEYLAVLSEETTRLSSLTKQLLTLASLDQ-ILVVDDDKHIRQLVGHYLRREGF-AVLEAMDGEAAEQIVTSQQVHLAVIDLMMPKMDGFELCQKIRTSYPEIPVIMLTAKDALIDKSRGFEVGTDDYVTKPFEPEELVFRI-
>lse_1423_HK_Classic|Listeria_seeligeri_serovar_1/2b_str._SLCC3954|Pair_lse_1422|HisKA_252-318/lse_1422_RR_OmpR|Listeria_seeligeri_serovar_1/2b_str._SLCC3954|Pair_lse_1423|Response_reg_3-112	-RRQFIADVSHEMRTPLTTISGLTEGLVNPKTETDRCIALIDTEARRLTKLVNENLDYEKIRS--LMIEDNVSVCEMIEMFFMKEEI-DATFVHDGKKGYETFLKEDFDIAIIDLMLPNMDGMTICRKIREVS-DMPIIILTAKESESDQVLGLEMGADDYVTKPFSPLTLMARIK
>lse_1934_HK_Classic|Listeria_seeligeri_serovar_1/2b_str._SLCC3954|Pair_lse_1935|HisKA_365-432/lse_1935_RR_OmpR|Listeria_seeligeri_serovar_1/2b_str._SLCC3954|Pair_lse_1934|Response_reg_7-116	MKSDFVNNVSHELRTPISMLQGYSEAIIDSDEEVREFAQIIYDESLRIGRLVNDMLDLARMEAGVLVVDDEDRIRRLLKMYLERENY-RIEEASDGDEALDMALNNNYEVILLDLMMPGKDGIEVCRELREYK-STPVVMLTAKGEEANRVQGFEVGADDYIVKPFSPREVVLRV-
>lse_2321_HK_Classic|Listeria_seeligeri_serovar_1/2b_str._SLCC3954|Pair_lse_2322|HisKA_159-225/lse_2322_RR_OmpR|Listeria_seeligeri_serovar_1/2b_str._SLCC3954|Pair_lse_2321|Response_reg_5-115	-RNDLITNVSHDLRTPLTSILGYLSYIHEDEIELRYYTELVYGKARHLHKLIDDLFSYTRLDS-ILIADDDKEIVDLVKLYLQNEGY-TIYLAYDGAEVWRLVQEKQPTLVILDIMMPEMNGLEVCRLMRSEGILTPILMLSAKAEDNDKIMGLLTGADDYMVKPFNPLELSVRV-
>lse_2400_HK_Classic|Listeria_seeligeri_serovar_1/2b_str._SLCC3954|Pair_lse_2401|HisKA_366-432/lse_2401_RR_OmpR|Listeria_seeligeri_serovar_1/2b_str._SLCC3954|Pair_lse_2400|Response_reg_4-114	-RSEFVTNVSHELKTPVTALKGFAETLLDDEALLKKFLTIIKEESDRLHRLIMDILALSRIEQ-ILVVDDEASIVTLLQFNIEKAGF-GVVTAEDGRAGYELALSEKPDLIVLDLMLPEMDGIEVTKKLRQNKVDVPILMLTAKDEELDKIIGLELGADDYMTKPFSPREVVARIK
>lse_2585_HK_Classic|Listeria_seeligeri_serovar_1/2b_str._SLCC3954|Pair_lse_2584|HisKA_668-736/lse_2584_RR_OmpR|Listeria_seeligeri_serovar_1/2b_str._SLCC3954|Pair_lse_2585|Response_reg_7-116	MRSNLLRAISHDLRTPLTGIIGASSALLEDKATQHDLIKGIKDDSGWLIRMVENLLSVTRISEGVLIVEDESGISNFISAVLTASDY-AVIKAVSGKEALEQTASHSPDVVLLDLGLPDMEGLDVLRDIRAWS-KVPIIVVSARDHEREKVTALDLGADDYITKPFGTSELLARIR
>BSU02010_HK_Classic|Bacillus_subtilis_subsp._subtilis_str._168|Pair_BSU02000|HisKA_129-185/BSU02000_RR_OmpR|Bacillus_subtilis_subsp._subtilis_str._168|Pair_BSU02010|Response_reg_6-111	-KKELLQKLRHDINTPLTALRLQLFYLED-QCHGQAVFESLYQQIEYISELTNEFNLYS-----ILIVEDDVMIGDLLQKILQREGY-RVIWKTDGADVLSVIQK--VDLVIMDVMLPGEDGYQMSAKIKKLGLGIPVIFLSARNDMDSKLQGLQIG-EDYMVKPFDPRELLLR--
>BSU02560_HK_Classic|Bacillus_subtilis_subsp._subtilis_str._168|Pair_BSU02550|HisKA_85-152/BSU02550_RR_OmpR|Bacillus_subtilis_subsp._subtilis_str._168|Pair_BSU02560|Response_reg_1-109	SMKRMLTNMSHDLKTPLTVILGYIEAIQSPDEERERLLGKLRQKTNELIQMINSFFDLAKLES--LLVEDDHSISEMVDHYLTKEGF-GIVHAFDGEEGIRLFQQGSYDLVLLDIMLPKLNGMDFLKIIREKS-NIPVLMISAKDGDVDKALGLGFGADDYIAKPFSMIELTARV-
>BSU03760_HK_Classic|Bacillus_subtilis_subsp._subtilis_str._168|Pair_BSU03750|HisKA_247-313/BSU03750_RR_OmpR|Bacillus_subtilis_subsp._subtilis_str._168|Pair_BSU03760|Response_reg_3-112	-RRQFIADVSHELKTPLTTINGLVEGLNSPEDKKDKCFSLISEETKRMLRLVKENLDYEKIRS-ILMIEDNVSVCTMTEMFFFKEGF-EAEFVHDGLEGYQRFTEENWDLIILDIMLPSMDGVTICRKIRETS-TVPIIMLTAKDTESDQVIGFEMGADDYVTKPFSPLTLVARIK
>BSU13260_HK_Classic|Bacillus_subtilis_subsp._subtilis_str._168|Pair_BSU13250|HisKA_231-298/BSU13250_RR_OmpR|Bacillus_subtilis_subsp._subtilis_str._168|Pair_BSU13260|Response_reg_6-116	-QQQFVQDASHELKTPLTIIESYSSLMKRKPEVLEESIEAIHSEAVHMKKLTNQLLALAKSHQ-ILIVEDEEKIARVLQLELEYEGY-SVTIKHNGTEGLDAAAEGGYSLVLLDVMLPGLSGLEVLRRLRKTDSQTPVILLTARDSIPDKVTGLDIGANDYVTKPFEIEELLARIR
>SALIVB_0318_HK_Classic|Streptococcus_salivarius_CCHSS3|Pair_SALIVB_0317|HisKA_273-333/SALIVB_0317_RR_OmpR|Streptococcus_salivarius_CCHSS3|Pair_SALIVB_0318|Response_reg_5-114	-QMRFLSDVSHELRTPIAVIKGHMDLLQRDPEILEESLEAASHEANRMTIMINDMLD-------ILIVEDEKNLARFVSLELQHEGY-DVVTADNGREGLEMALEKDFDLILLDLMLPEMDGFEVTRRLQQEK-DTYIMMMTARDSIMDIVAGLDRGADDYIVKPFAIEELLARIR
>SALIVB_0433_HK_Classic|Streptococcus_salivarius_CCHSS3|Pair_SALIVB_0432|HisKA_190-252/SALIVB_0432_RR_OmpR|Streptococcus_salivarius_CCHSS3|Pair_SALIVB_0433|Response_reg_5-115	-QRRFITNAGHELKTPLAIISANTEL-QELMTGENEWTKSTNDQVARLTTLINSLVALSRLEE-ILLAEDEEALSRVYKAALEHQGY-EVDQAFNGQEAVDLAAQNAYQVMIMDIMMPIKTGIEALKEIRSSGDRTHVIMLTAMAEIDDRVTGLDAGADDYLTKPISLKELLARL-
>SALIVB_0669_HK_Classic|Streptococcus_salivarius_CCHSS3|Pair_SALIVB_0670|HisKA_229-293/SALIVB_0670_RR_OmpR|Streptococcus_salivarius_CCHSS3|Pair_SALIVB_0669|Response_reg_12-112	-KENWISGIAHDIKTPLSVIISNASLIKSADKNQLRRLRSILNESYYIQNTINDLNIFARLT--ILVVDDDVALNHSIREILSVSGFSKIYSAYSISEGIESFVKNSIDLIILDVMLPDGEGYLLSKYVRKES-DIPILFLTAKNEPEDEIQGLQSGGDDFITKPFLPKILI----
>SALIVB_0711_HK_Classic|Streptococcus_salivarius_CCHSS3|Pair_SALIVB_0710|HisKA_231-296/SALIVB_0710_RR_OmpR|Streptococcus_salivarius_CCHSS3|Pair_SALIVB_0711|Response_reg_3-112	-KVEFLRGASHELKTPLASLKIILENMRDY-KDRERYLAVSLDIVDEMNQIVLEILSLSSVQ--ILIVEDEVLIREGMSDYLMECGY-EVFEAGDGQEALDIFHREAPDLVLLDIQLPIFNGLEVLKTIRKTS-SVPVLMLTAFHDEDYKLTAFGELADGYLEKPFSLSLLKVRI-
>SALIVB_0861_HK_Classic|Streptococcus_salivarius_CCHSS3|Pair_SALIVB_0860|HisKA_250-317/SALIVB_0860_RR_OmpR|Streptococcus_salivarius_CCHSS3|Pair_SALIVB_0861|Response_reg_4-113	--KAFVENASHELRTPLAVIQNRLEVLFRTILDNSENIASSLDEVRNMRLLTTNLLNLARRDDGILLVEDDLSLSNSVFDFLD--DFADVMQVFDGDEGLYEAESGVYDLILLDLMLPEKDGFTVLRELRDKGVTTPVLIMTAKESLDDKGHGFELGADDYLTKPFYLEELKMRI-
>SALIVB_0932_HK_Classic|Streptococcus_salivarius_CCHSS3|Pair_SALIVB_0931|HisKA_199-259/SALIVB_0931_RR_OmpR|Streptococcus_salivarius_CCHSS3|Pair_SALIVB_0932|Response_reg_4-111	-KQNQISALTHDLKTPLTVARGNAELLAMLDENQTDLLEHFQKGIAQVDAYVKELSELNK----ILVVDDQEDIVQFVVKALELQNH-KVTGLTSVLDL-DKNSLPRFDLILLDIMMPDVDGLQFCHDIRDQV-DCPILFITAKTQEADIVQGLTYGADDYICKPFGIKELQARV-
>SALIVB_1146_HK_Classic|Streptococcus_salivarius_CCHSS3|Pair_SALIVB_1147|HisKA_207-272/SALIVB_1147_RR_OmpR|Streptococcus_salivarius_CCHSS3|Pair_SALIVB_1146|Response_reg_4-113	-RRLFVSNVSHELRTPLTSVKSYLEALDDDEEIAPNFIKVSLDETNRMMRMISDLLALSRIDN-ILVVDDERPISDIIKFNLTKEGY-EVVTAFDGREALEQFEAEKPDLVILDLMLPELDGLEVAKEIRKTS-HTPIIMLSAKDSEFDKVIGLEIGADDYVTKPFSNRELLARIK
>Calkr_0110_HK_Classic|Caldicellulosiruptor_kristjanssonii_177R1B|Pair_Calkr_0109|HisKA_211-277/Calkr_0109_RR_OmpR|Caldicellulosiruptor_kristjanssonii_177R1B|Pair_Calkr_0110|Response_reg_4-110	-RREFVANFVHDLKTPIAVIKGYCESTKYDKEKIKQNMDGIEKQCDYMQNLISNMVELSKISAGILVVEDQQDLNQIITRFLKNEGF-NVINSYTAKDALEKLND--ADLIILDIMLPDMEGYEVLKEASKKG--IPTIILTSKSEEFDKLKGFELGAEDYITKPFSMLELIARV-
>Calkr_0245_HK_Classic|Caldicellulosiruptor_kristjanssonii_177R1B|Pair_Calkr_0246|HisKA_237-302/Calkr_0246_RR_OmpR|Caldicellulosiruptor_kristjanssonii_177R1B|Pair_Calkr_0245|Response_reg_3-112	-RRDFIANTTHELRTPLSIIKSYAEAIYDNKDQIKEYAYSIMIEADHLNNLINEILELSKLQSGILLIEDEEKLRKIIKLYLEKEGF-EVEEVSDGNEAIEKFQPSMYSVVILDVMLPQKDGWSVLREIRKKD-DTPVIMLTARGEDDDKIFGFELGADDYVVKPVSPKEIVARVK
>Calkr_0254_HK_Classic|Caldicellulosiruptor_kristjanssonii_177R1B|Pair_Calkr_0253|HisKA_238-305/Calkr_0253_RR_OmpR|Caldicellulosiruptor_kristjanssonii_177R1B|Pair_Calkr_0254|Response_reg_6-115	-QNQFVSDASHELRTPLSVINGYINLIDRDKEVLQESIVAIKNEVKYMTELVERLLFLARGDSGILIIEDEKQIARFIELELKHEGY-DVYVCYDGKEGLKKVEEIHPDLILLDIMLPGINGIEICRKIRQHS-NVPIIMVTAKDDIPDRVMGLDSGADDYVTKPFAIEELLARIR
>Calkr_1440_HK_Classic|Caldicellulosiruptor_kristjanssonii_177R1B|Pair_Calkr_1441|HisKA_246-310/Calkr_1441_RR_OmpR|Caldicellulosiruptor_kristjanssonii_177R1B|Pair_Calkr_1440|Response_reg_3-112	-RKSFIFNVSHELRSPLTSIRGFVEGILDPDDKRDFYLTLVKEEVIKLNNLINQLLELSRLE--ILVIDDDVKICEVIKLYLEKEGF-EVVVAHNGMDGIAMFKNEMPDLVILDIMLPKKDGYEVCRELRKIS-NIPIIMLTAKGETFDKVLGLELGADDYIVKPFDPKELIARIK
>Calkr_1471_HK_Classic|Caldicellulosiruptor_kristjanssonii_177R1B|Pair_Calkr_1472|HisKA_346-411/Calkr_1472_RR_OmpR|Caldicellulosiruptor_kristjanssonii_177R1B|Pair_Calkr_1471|Response_reg_4-116	-RSDFVANVSHELKTPLTSIKGFVETLKDDKDVATKFLNIIEVEVERLVRLINDLLYLSEIEN-ILIVDDEQHILELLKFNLRKEGY-NTFEADSGVLALEILKHNKVDLVILDIMMSDKDGYEVLKEIRFNRKNLPVILLSAKSEEIDKILGLELGADDYITKPFSVKELVVRV-
>Calkr_1765_HK_Classic|Caldicellulosiruptor_kristjanssonii_177R1B|Pair_Calkr_1766|HisKA_237-302/Calkr_1766_RR_OmpR|Caldicellulosiruptor_kristjanssonii_177R1B|Pair_Calkr_1765|Response_reg_6-115	-QIRFLQNISHELKTPLTSVRGYAEMLKEDKSKMESAAEKIIWHVDRLKSLINQIIDLTKIES-VYVVDDEKDILELVSEYLIQKGY-AVKTFENGESFLEEFGKSEPDIVILDIMLPDIDGYEICKRIRKNS-DVPIIMLSAKGEELDKVLGLELGSDDYISKPFSLSELEARIK
>Calkr_2459_HK_Classic|Caldicellulosiruptor_kristjanssonii_177R1B|Pair_Calkr_2460|HisKA_342-407/Calkr_2460_RR_OmpR|Caldicellulosiruptor_kristjanssonii_177R1B|Pair_Calkr_2459|Response_reg_6-115	MRKQFVADVSHELRTPITTIKTYSETLLDDETVKKKFLNVIIKECDRMTRLISDLLYLSRLDSGILVVDDEKPIVDIIKFNLEKEGY-KVTASYDGEDALNRIKSENFDMVLLDVMLPKLDGFSVCKKVREFS-DVPIIMITAKADEVDKVLGLELGADDYITKPFGIRELIARIR
>TWT046_HK_Classic|Tropheryma_whipplei_str._Twist|Pair_TWT047|HisKA_249-314/TWT047_RR_OmpR|Tropheryma_whipplei_str._Twist|Pair_TWT046|Response_reg_30-139	-MKQFLADASHELRTPLVSLRGYAELYRIGKEDIDNAIERIEKEAIRMGTMVEDLLSLTRLEK-ILVVDDEANIRDLLAASLRFAGY-GVVTAGNGAGAVSAVLAEEPDLIIMDVMLPDMSGFAATKRLREAGFRCPVIFLSARDSTEDKITGLTVGGDDYVTKPFSLDEILARV-
>CE0234_HK_Classic|Corynebacterium_efficiens_YS-314|Pair_CE0233|HisKA_262-325/CE0233_RR_OmpR|Corynebacterium_efficiens_YS-314|Pair_CE0234|Response_reg_6-116	-QRQFVDDAGHELRTPITVVRGQLELLESPPEERTRSIELATTELDRMARMVNDLLTLAVADSGILIAEDDDGIADFIRRGLVQEGF-ECEVAVSGAAAFARAHSGDFDLMILDLGLPHMDGADVLEQLRVLKVSLPIIVLTARTNIEDRIRSLEGGADDYMPKPFQFAELLARVK
>CE0279_HK_Classic|Corynebacterium_efficiens_YS-314|Pair_CE0278|HisKA_144-206/CE0278_RR_OmpR|Corynebacterium_efficiens_YS-314|Pair_CE0279|Response_reg_15-124	-RRQMLSDLAHEMGTPLSVLAVYLDGLQDVIDWNTATQKVISDQLSRLTRLTEDMDEVSRVQ--VLIVDDEKPLAQMVETYLLRAGF-ETVQAHTGIDAVHEARRFSPDVVILDLGLPELDGLEVCRQVRAFS-DCYILMLTARGSEEDKITGLTMGADDYITKPFGIRELVTRVR
>CE0424_HK_Classic|Corynebacterium_efficiens_YS-314|Pair_CE0425|HisKA_156-220/CE0425_RR_OmpR|Corynebacterium_efficiens_YS-314|Pair_CE0424|Response_reg_4-113	ARRDFVANVSHELKTPVGGMALLAEALMEDPEQVEYFGARLHREAHRMADMINELISLSKLQG-ILIVEDEESLADPLAFLLRKEGF-DTIIAGDGPTALVEFSRNDIDIVLLDLMLPGMSGTDVCKELRLVS-NVPVIMVTARDSEIDKVVGLELGADDYVTKPYSSRELIARIR
>CE0770_HK_Classic|Corynebacterium_efficiens_YS-314|Pair_CE0769|HisKA_244-310/CE0769_RR_OmpR|Corynebacterium_efficiens_YS-314|Pair_CE0770|Response_reg_5-114	-QRQFTSDVSHELRTPLTTVRMAADLIADLSSVARRASELMVRELDRFESLLNDLLEISRHDAGILVVDDDPAISEMLTIVLSAEGF-DTVAVTDGALAVETAEREQPDLILLDLMLPGMNGIDICRAIRQDS-AVPIIMLTAKTDTVDVVLGLESGADDYVNKPFKAKELVARIR
>CE0949_HK_Classic|Corynebacterium_efficiens_YS-314|Pair_CE0948|HisKA_253-324/CE0948_RR_OmpR|Corynebacterium_efficiens_YS-314|Pair_CE0949|Response_reg_3-113	-QSQLVADAGHELKTPLTSMRTNIELLMMSEQDRHELECDVLAQMEEMSTLIGDLVDLTREEE-VLVVDDEPAVRESLRRSLTFNGY-NVVTAEDGVQALEVIEREHPEIVILDVMMPRMDGLEVCRTLRSQGDDRSILILTARDNVSDRVGGLDAGADDYLTKPFALEELLARVR
>CE2493_HK_Classic|Corynebacterium_efficiens_YS-314|Pair_CE2494|HisKA_254-316/CE2494_RR_OmpR|Corynebacterium_efficiens_YS-314|Pair_CE2493|Response_reg_15-125	-MRRFVGDASHELRTPLTSVKGYSELYHSA-TRDADVLSKISGEAQRMSVLVEDLLSLTRAEG-VLVVDDEPNIVELLTVSLKFQGF-NVMTASDGNEGLKIAREFRPDAYILDVMMPGMDGFELLTKLRAEGLDGPVLYLTAKDAVENRIHGLTIGADDYVTKPFSLEEVITRL-
>HELPY_1354_HK_Classic|Helicobacter_pylori_B38|Pair_HELPY_1355|HisKA_169-221/HELPY_1355_RR_OmpR|Helicobacter_pylori_B38|Pair_HELPY_1354|Response_reg_5-116	---HFLKNTTHELNTPMSALVLSLKTLED-----SQQHRRIKIAIQRMSFLY------------IFLLEDDYLLSESIKEFLEHLGY-EVFCAFNGKEAYERLSVERFNLLLLDVQVPEMNSLELFKRIKNDFISTPVIFITALQDNATLKNAFNLGASDYLKKPFDLDELEVRI-
>TEH_08120_HK_Classic|Tetragenococcus_halophilus_NBRC_12172|Pair_TEH_08110|HisKA_252-318/TEH_08110_RR_OmpR|Tetragenococcus_halophilus_NBRC_12172|Pair_TEH_08120|Response_reg_3-115	-RRQFMSDASHEMRTPLTTINGLLEGLQYP-EDQKDAIRLMKNETNRLIRLVSENLDYEKIRT-VLMIEDNESVCEMMQMFFVNEGW-EVTFKYDGQTGIDAFNPQNWDMIILDLNLPEVDGMVVARKIREVSSTVPLVMLTARDSESDQVIGLEIGADDYVTKPFSPLTLIARIK
>TEH_09060_HK_Classic|Tetragenococcus_halophilus_NBRC_12172|Pair_TEH_09050|HisKA_265-331/TEH_09050_RR_OmpR|Tetragenococcus_halophilus_NBRC_12172|Pair_TEH_09060|Response_reg_4-113	-QEQFVEDVSHELRTPVAVIEGHLKMLQRDPEVLEESIEASLQEIARMKTLVQEMLDLSRAEQ-ILIIEDEKNLARFVELELKHEGY-DTEVHYNGRTGLDAALNNDWDAILLDLMLPELNGLEICRRVRQIK-NTPIIMMTARDSVIDRVSGLDHGADDYIVKPFAIEELLARL-
>TEH_10320_HK_Classic|Tetragenococcus_halophilus_NBRC_12172|Pair_TEH_10310|HisKA_227-291/TEH_10310_RR_OmpR|Tetragenococcus_halophilus_NBRC_12172|Pair_TEH_10320|Response_reg_6-117	--KQFVSDASHELRTPIAAIRGHVNLIQRHPEVIPQSLEFIDKESKRIELLSEQLLTLGRVEN--LLVEDEESLASFIQSELQFEGY-KTSWEKNGEAALDTFYKEQFDLILLDWMLPGLDGITIARRIRKVS-KIPIIMMTARTQTTDIVTGLDTGLDDYITKPFEIEELFARIR
>TEH_11190_HK_Classic|Tetragenococcus_halophilus_NBRC_12172|Pair_TEH_11180|HisKA_377-444/TEH_11180_RR_OmpR|Tetragenococcus_halophilus_NBRC_12172|Pair_TEH_11190|Response_reg_4-113	-RREFVSNVSHELRTPLTSTRSYIEALSEDEEIAPKFLNVTLNETDRMIRMINDLLSLSRMDSGILVVDDEKPITDIVNFNLSKEGY-EVYTAYDGEEALEQVEEVKPDLVLLDLMLPKVDGLEVAREIRKTY-DMPIIMVTAKDAEIDKVLGLELGADDYVTKPFSNRELVARVK
>TEH_14590_HK_Classic|Tetragenococcus_halophilus_NBRC_12172|Pair_TEH_14580|HisKA_266-330/TEH_14580_RR_OmpR|Tetragenococcus_halophilus_NBRC_12172|Pair_TEH_14590|Response_reg_4-113	-RRELISNISHDLKTPITSITGYVEGLLDTEEKRVSYLKTIHEKSLTLNELIDELFLYSKLD--ILIIEDDESIANLQKDYLEINEM-EVTIETDGKKGLQSALDYPYDLIIVDLMLPSMDGFEICKQIRLKK-QLPIMIASAKKEDFDKVRGLGLGANDYLVKPFSPNELVARVK
>TEH_17300_HK_Classic|Tetragenococcus_halophilus_NBRC_12172|Pair_TEH_17290|HisKA_351-413/TEH_17290_RR_OmpR|Tetragenococcus_halophilus_NBRC_12172|Pair_TEH_17300|Response_reg_4-114	-QNDLIGNVSHELKTPVTSLIGFTETLLDDPETLKSFLEIMQKDAYRLQDLVQEIIESSK----ILVVDDEPSIVTLLTFNLEKAGY-QVTSAEDGKKAYELATNQTFDFIILDIMLPFIDGIDLTQKLRQEKIDTPILILTAKDESIDRILGLEIGADDYLTKPFSPREVIARIK
>TEH_25190_HK_Classic|Tetragenococcus_halophilus_NBRC_12172|Pair_TEH_25180|HisKA_159-226/TEH_25180_RR_OmpR|Tetragenococcus_halophilus_NBRC_12172|Pair_TEH_25190|Response_reg_3-113	SKDELITNISHDIRTPLTSIIGYLGLIEDSEEELLKYTHTAFVKTKQMKSLVDDLFEYTKAR--ILVADDDKEIVELLSIYLHNEGY-EPIVAYDGKEVLSKIHTLSIELVILDIMMPELDGMQIVKTLRKES-QIPIILLTAKTTDMDKIKGLVAGADDYVTKPFNPLEVMARV-
>RHA1_ro01229_HK_Classic|Rhodococcus_jostii_RHA1|Pair_RHA1_ro01228|HisKA_618-685/RHA1_ro01228_RR_OmpR|Rhodococcus_jostii_RHA1|Pair_RHA1_ro01229|Response_reg_4-113	-RRSLLSAVSHDLRTPLAAVKAAASSLRSSPEDTAELLATIEESADVLTSLVGNLLDSSRLAAGVLVVDDEPQILRALRINLSVRGY-DVVTAASGAAALRAAAERPPDVIVLDLGLPDMDGTEVLAGLRGWC-PAPVIVLSARTDSADKVEALDAGADDYVTKPFGMDEFLARV-
>RHA1_ro02069_HK_Classic|Rhodococcus_jostii_RHA1|Pair_RHA1_ro02068|HisKA_154-217/RHA1_ro02068_RR_OmpR|Rhodococcus_jostii_RHA1|Pair_RHA1_ro02069|Response_reg_4-113	-RRDFVANVSHELKTPVGAMGLLAEALLEDPESVRHFGERVLSESVRLGKMVTELIALSRLQG-VLIVEDEESLADPLAFLLRKEGF-ETTIVGDGPSALAEFDRAGADIVLLDLMLPGMSGTDVCKQLRSRS-GVPVIMVTARDSEIDKVVGLELGADDYVTKPYSARELIARIR
>RHA1_ro02300_HK_Classic|Rhodococcus_jostii_RHA1|Pair_RHA1_ro02301|HisKA_247-306/RHA1_ro02301_RR_OmpR|Rhodococcus_jostii_RHA1|Pair_RHA1_ro02300|Response_reg_3-110	-QRQLIADTAHQLRNPLAALHIRLDSLGPVSETGAETYRRTGMEVDRLGGILDGLLALAV----IAVVEDDDGVGDALVEALATHGH-EAVRMRRGSDLL--LGHRGMDAVILDLGLPDADGLQVLRQLRAVS-DVPVVILTARDDERSVVRGLRGGADDYLVKPARLAELLARL-
>RHA1_ro03353_HK_Classic|Rhodococcus_jostii_RHA1|Pair_RHA1_ro03354|HisKA_250-314/RHA1_ro03354_RR_OmpR|Rhodococcus_jostii_RHA1|Pair_RHA1_ro03353|Response_reg_6-113	-QQRLIADTAHQLRNPLAALQFRLDLLDDVPDSAREDYHSVTEEAKRLQTILDSLLSLASAET-IAVVEDDDGVGNAIVAGLTRQAHQPVR-MKFGSELL--LHHGEVDFVLLDLGLPDRDGLEVLRQLRQVS-AVPVIILTARDDERSVVRGLRGGADDYLVKPARMSELFARIE
>RHA1_ro04742_HK_Classic|Rhodococcus_jostii_RHA1|Pair_RHA1_ro04741|HisKA_239-303/RHA1_ro04741_RR_OmpR|Rhodococcus_jostii_RHA1|Pair_RHA1_ro04742|Response_reg_10-120	-MRRFVADASHELRTPLTTIRGFAELYRQAMTDTETLMSRIEGEASRMGLLVEDLLMLARLDA-VLVVDDEPNILELLSVSLRFQGF-EVATASTGAEGLDTARTFRPDAVILDVMMPGMDGFGLLKRLRADGVDAPVLFLTAKDAVEDKISGLTLGADDYVTKPFSLEEVVTRL-
>RHA1_ro05000_HK_Classic|Rhodococcus_jostii_RHA1|Pair_RHA1_ro05001|HisKA_223-285/RHA1_ro05001_RR_OmpR|Rhodococcus_jostii_RHA1|Pair_RHA1_ro05000|Response_reg_9-119	--RDFAAVSAHELRTPLTAMRTDLEVLTTTPEQQHEILRDLARSQGRVESTLSDLERLARGE--VLVVDDDEDVRTSLERGLRLSGF-TVLTAVDGADALRVVSERRPDAMVLDMNMPVIDGTGVVTALRAMNNDIPICVLSARDTVDDRISGLESGADDYLVKPFVLAELIARIR
>RHA1_ro05053_HK_Classic|Rhodococcus_jostii_RHA1|Pair_RHA1_ro05052|HisKA_112-175/RHA1_ro05052_RR_OmpR|Rhodococcus_jostii_RHA1|Pair_RHA1_ro05053|Response_reg_6-114	-RRELIGNVSHELRTPISALQALLENIVDVEEPDPARMRVALDQTERLGRLVAELLDLSRVEGGVLVVDDEATIREAVAARLRAEGF-DVVTASDGPSAVAECEASSPDVLVLDVMLPGYDGLEVCRRVQASR-PVPVLMLTARADETDMLIGLGVGADDYLSKPFSMRVLVARV-
>RHA1_ro05623_HK_Classic|Rhodococcus_jostii_RHA1|Pair_RHA1_ro05622|HisKA_265-337/RHA1_ro05622_RR_OmpR|Rhodococcus_jostii_RHA1|Pair_RHA1_ro05623|Response_reg_3-113	-QSRLVADAGHELRTPLTSLRTNMELLIAPDEDMAELRTDVVAQIEELSQLVGDLVDLAREDA-ILVVDDDRAVRESLRRSLSFNGY-SVELAVDGIDALEKVANARPDAIVLDVMMPRLDGLEVCRRLRSTGDDLPILVLTARDSVSERVSGLDAGADDYLPKPFALEELLARL-
>RHA1_ro06325_HK_Classic|Rhodococcus_jostii_RHA1|Pair_RHA1_ro06324|HisKA_298-364/RHA1_ro06324_RR_OmpR|Rhodococcus_jostii_RHA1|Pair_RHA1_ro06325|Response_reg_5-114	-QKRFTSDVSHELRTPLTTVRMAADLIHDLDPVLRRSSELLVAELDRFEGLLADLLEISRHDAGILVVDDDTALAEMLTIVLRGEGF-DPYVVGDGTQALTAVRETRPDLVLLDLMLPGMNGIDVCRVLRADS-GVPIVMLTAKTDTVDVVLGLESGADDYIMKPFKPKELVARVR
>Clo1100_0269_HK_Classic|Clostridium_sp._BNL1100|Pair_Clo1100_0268|HisKA_265-328/Clo1100_0268_RR_OmpR|Clostridium_sp._BNL1100|Pair_Clo1100_0269|Response_reg_4-113	-RRELIANISHDLRTPLTMITGYGEVMRDPGENTPENVQIIIDEAIRLTTLVNDILDISQLQSGILIVDDEDGIRAIIKKYAVFEGH-EVVEATDGMEAIQVCREMEFDIIVMDVMMPELDGFSACKEIRKFS-MTPVLMLSARGEEYDKIHGFELGIDDYVVKPFSPKELMMRIN
>Clo1100_1595_HK_Classic|Clostridium_sp._BNL1100|Pair_Clo1100_1594|HisKA_123-185/Clo1100_1594_RR_OmpR|Clostridium_sp._BNL1100|Pair_Clo1100_1595|Response_reg_4-117	----LISDISHQLKNPLANLKIYVSLIMDNPLMRMEYLKNIDNQLDKLNWLMESMIKMTRLESGILIVEDDKLLNDGISIALKKCGH-TVLSGYSYHEAFCLFLNNSFELILLDINLPDRSGLELCSEIRKKS-DIPIIFITANDTEQDIVNGFVNGCDDYIAKPFSLEVMNRR--
>Clo1100_2288_HK_Classic|Clostridium_sp._BNL1100|Pair_Clo1100_2287|HisKA_524-590/Clo1100_2287_RR_OmpR|Clostridium_sp._BNL1100|Pair_Clo1100_2288|Response_reg_3-112	MKAELITNVSHDLKTPLTSIITYVDLLKSASENSKKYLEIIDKKSQRLKTLTEDLFEAAKASS-ILVCDDDKEIVDAIEIYLKNEGY-CVYKAYNGAEALSVFDNSEIHLVIIDIMMPVMDGIRATMKIREKY-NIPVLMLSAKSEDTDKIIGLNMGADDYVTKPFNPLELVARVK
>Clo1100_2513_HK_Classic|Clostridium_sp._BNL1100|Pair_Clo1100_2512|HisKA_376-441/Clo1100_2512_RR_OmpR|Clostridium_sp._BNL1100|Pair_Clo1100_2513|Response_reg_6-118	-RTEFVSNVTHELKTPLTSIRGFVETLKNDATVAVKFLDIIDIEAERLYTLINDILQLSEIEA-IFVVEDEMHIQQLIKYNLEANGF-KVNVFDNGEDLLAYSSENVPDLFILDIMLPGIDGLEVCRNLKQTSKTIPIIMLTAKSEEFDKVLGLELGADDYITKPFSVRELVARVK
>Clo1100_2693_HK_Classic|Clostridium_sp._BNL1100|Pair_Clo1100_2694|HisKA_248-314/Clo1100_2694_RR_OmpR|Clostridium_sp._BNL1100|Pair_Clo1100_2693|Response_reg_5-115	-KNDFISTVSHELRTPLTSIKGWANTIIDDREILSDGLNIIVKESDRLTDMVEELLDFSRIVS-VLIIEDEESIRGFLKINFKKHNF-IVVEAATGEEGLLKARQENPDVVLLDVMLPGISGFQVCETLRKELPGVGIIMLTARGQDIDKIKGLEYGADDYVVKPFNTTELILR--
>Clo1100_2888_HK_Classic|Clostridium_sp._BNL1100|Pair_Clo1100_2889|HisKA_269-334/Clo1100_2889_RR_OmpR|Clostridium_sp._BNL1100|Pair_Clo1100_2888|Response_reg_6-117	MRKEFISNVSHELKTPIAIVQGYAEGLKLDDEENKNYCDVIIDEANKMDSMVRKLLELSELE--ILIADDEERMRRLVADFLKKQGY-SVIEADNGMQALKIFQKEAINLVILDVMMPVMDGWETLRSIRQYS-KVPVIMLTAKSTEADELLSFGIGADEYITKPFSLMILLARV-
>Clo1100_2899_HK_Classic|Clostridium_sp._BNL1100|Pair_Clo1100_2900|HisKA_84-151/Clo1100_2900_RR_OmpR|Clostridium_sp._BNL1100|Pair_Clo1100_2899|Response_reg_7-116	--KQLIANISHDIRTPLTSLLGFVEVLQKSNTEQKEYLGIIHTKAQNLYKMIQDFFELSQLES-ILIVEDDREINMLIADNLIKEGY-CVISTYDGAAATEKFTADKFQLVILDIMLPKVGGYEVLQKIREKG-NTPVLILSAKCQETDKIIGLGLGADDYLAKPFGIGELTARVK
>Clo1100_2903_HK_Classic|Clostridium_sp._BNL1100|Pair_Clo1100_2904|HisKA_192-258/Clo1100_2904_RR_OmpR|Clostridium_sp._BNL1100|Pair_Clo1100_2903|Response_reg_3-111	-LKRIMADISHQLKTPLASLIMFNDIMKNLSEEERDFVLESKNQLDRMEWLIKNILKMAKLEAGILLVEDDAPLAMGIEYALKKQDF-AVSIAKNIKDAYRMFNED-IQLILLDVTLPDGNGYDFCKQIRQTS-NVPIIFMTALDDEPNVVFGLDIGGDDYISKPVRTSELISRIN
>Clo1100_3156_HK_Classic|Clostridium_sp._BNL1100|Pair_Clo1100_3155|HisKA_195-261/Clo1100_3155_RR_OmpR|Clostridium_sp._BNL1100|Pair_Clo1100_3156|Response_reg_3-113	-QKQFVADASHELKTPLAVINTNVDVLLSTIDSQSKWLNYIKSESERMAKLTNDLLYLTQMD--ILIVEDEIHLAEALSQILRKNNY-TVDIAYDGSTGLDNALSGIYDLILLDIMLPNMDGISVLKHIRSENILTPVILLTAKGEIADKVKGLDSGADDYLPKPFATEELLARIR
>Clo1100_3165_HK_Classic|Clostridium_sp._BNL1100|Pair_Clo1100_3166|HisKA_127-192/Clo1100_3166_RR_OmpR|Clostridium_sp._BNL1100|Pair_Clo1100_3165|Response_reg_4-114	-RNDFVNNVSHEFKTPLAAIEGYATLLQDPREEEQKYINYILDNTARLAKLTQNILSLSRLDN-ILVVEDDQSLSKLFCTVLAKHGY-SYYVANDGLEAWDIIEKQYIDLVISDIMMPNMDGYELVKSLRDNGYNMPVLMITAKDTFEDMKNGFRVGTDDYMIKPVNVNEMILRV-
>Clo1100_3923_HK_Classic|Clostridium_sp._BNL1100|Pair_Clo1100_3922|HisKA_386-453/Clo1100_3922_RR_unclassified|Clostridium_sp._BNL1100|Pair_Clo1100_3923|Response_reg_4-113	-RTDFIATISHEFKTPLTSIVMGTDILSDLNDDQKQIIKAIREDSDRLTKLVNDLLELTRIESGVLVVDDTKNIRMILTKCLELEGY-EVLTASDGTQALELFTTHTFDLAFLDIKLPGVRGTEVLKRIRENGIKTPVIIITAYATVKNAVDCTNLGAVAYVQKPFSADKIRNV--
>Clo1100_3989_HK_Classic|Clostridium_sp._BNL1100|Pair_Clo1100_3990|HisKA_382-449/Clo1100_3990_RR_OmpR|Clostridium_sp._BNL1100|Pair_Clo1100_3989|Response_reg_5-114	MRREFVANVSHELRTPITSIKSYTETLLEDQETSKRFLSVIDSEADRMTRLVKDLLQLSRLDN-ILIVDDEKNIVDILKFNLKKEGY-DTIEAYDGEEAVNLALSQNPDLILLDIMLPKMDGFTVCRKLRQSI-STPILMLTAKEEEVDKVLGLELGADDYITKPFSPRELMARVK
>BMB171_C0254_HK_Classic|Bacillus_thuringiensis_BMB171|Pair_BMB171_C0255|HisKA_108-175/BMB171_C0255_RR_OmpR|Bacillus_thuringiensis_BMB171|Pair_BMB171_C0254|Response_reg_6-115	SRKQLLSSISHDIRTPLTSIIGYIDALKDSEIEKQEYLKILYMKSNNLKHLVDEIFNMAKLDA-ILIADDDKEIRNLLKIYLERELY-MVDTAINGEEALHLFNQNNYNLVILDLMMPKIDGIEVCKKLRDKT-NVPILMLTAKDHEVDKILGLSIGADDYITKPFSIHEVIARV-
>BMB171_C0507_HK_Classic|Bacillus_thuringiensis_BMB171|Pair_BMB171_C0508|HisKA_262-327/BMB171_C0508_RR_OmpR|Bacillus_thuringiensis_BMB171|Pair_BMB171_C0507|Response_reg_4-113	-RNEFLASVAHELLTPLTYMKGYAKVAKRTKEEREEYLQIIEDETDSVTDLVQDLFMLVQLEQ-ILLVDDEERMLRLLDLFLSPRGY-FCMKATSGLEALKLIEQKEFDIILLDVMMPSMDGWDTCYQIRQIS-NVPIIMLTARNQNYDMVKGLTMGADDYITKPFDEHVLVARIE
>BMB171_C0570_HK_Classic|Bacillus_thuringiensis_BMB171|Pair_BMB171_C0571|HisKA_234-299/BMB171_C0571_RR_OmpR|Bacillus_thuringiensis_BMB171|Pair_BMB171_C0570|Response_reg_4-113	-RSEFLASVAHELRTPLTYVRGYADILKEPSEQRLRYLSIIKDESDYITNLVQDLFSLAQMEQ-ILLVDDEPRMLELLTLYLTPIGY-NCVCATSGEEAILHIENQNFKFVLLDIMMPKMDGWETCKKIRSFS-NIPIIMVTARDQTVDVVQGLKIGADDYVTKPFHEEELFARIE
>BMB171_C0984_HK_Classic|Bacillus_thuringiensis_BMB171|Pair_BMB171_C0985|HisKA_356-414/BMB171_C0985_RR_OmpR|Bacillus_thuringiensis_BMB171|Pair_BMB171_C0984|Response_reg_6-114	-REEWITGLTHDLKTPLSSIYGYALLLESTDRDIQQFGSVMKEKSQYMTTLIDDLL--------ILLVDDETAILQLLTTILEKEGFSHITTATSAEMALSLTKQNNYDLIILDVMLPGQSGFDICPIIRQQT-DCPIFFLSAKASDLDKISGFSYGADDYITKPFNPLEVVARM-
>BMB171_C1760_HK_Classic|Bacillus_thuringiensis_BMB171|Pair_BMB171_C1759|HisKA_235-302/BMB171_C1759_RR_OmpR|Bacillus_thuringiensis_BMB171|Pair_BMB171_C1760|Response_reg_4-114	MKNEFIASISHEIRTPLTGIKGWSETLKTTEEEIKQGMGIISGETDRLIHLVEELLDFSRLQS-ILVLEDELTIRSFIVLNLKRAGF-YVIEATTGEEALQILSEQTVDIALLDVMLPGIDGLEVCKAIRKENKKMGIIMLTARVQDEDKVQGLGMGADDYIAKPFSPVVLTARIQ
>BMB171_C2301_HK_Classic|Bacillus_thuringiensis_BMB171|Pair_BMB171_C2300|HisKA_124-170/BMB171_C2300_RR_OmpR|Bacillus_thuringiensis_BMB171|Pair_BMB171_C2301|Response_reg_4-113	----FMNQWIHQMKTPLSVIE----LITQ--DEVDSRFESINEETDRLKKGLEMALYVARLEA-IMIVEDDMKIAELLSTYVAKYGY-QGVIVSDFQNVLDIFLDEQPELVLLDINLPSFDGYFWCRQIRSVS-TCPILFISAREGTMDQVMALENGGDDFIPKPFHYEVVVAKI-
>BMB171_C4308_HK_Classic|Bacillus_thuringiensis_BMB171|Pair_BMB171_C4307|HisKA_255-319/BMB171_C4307_RR_OmpR|Bacillus_thuringiensis_BMB171|Pair_BMB171_C4308|Response_reg_4-113	-RKELISNISHDLKTPITSIIGYVEGIKDTPEKMDKYLTTIHTKARHMDTLIDELFLFSKLD--ILLIEDEVSIAELQRDYLEINDF-QVDVEHSGETGLQIALQEDYDLIILDIMLPKMNGFEICKQIRAVK-DIPILLVSAKKEDIDKIRGLGLGADDYITKPFSPSELVARVK
>BMB171_C4488_HK_Classic|Bacillus_thuringiensis_BMB171|Pair_BMB171_C4489|HisKA_141-208/BMB171_C4489_RR_OmpR|Bacillus_thuringiensis_BMB171|Pair_BMB171_C4488|Response_reg_6-115	SKDQLVVNLAHDLRTPLTSVLGYLDLLKDTKEQIKHFSTIAYTKSQRLESLIDELFEITRMN--ILIADDEAEIADLIEIHLEKEGY-HVVKAADGEEAIHIIETQPIDLVILDIMMPKMDGYEVTRQIRTKH-HMPIIFLSAKTSDFDKVTGLVLGADDYMTKPFTPIELVARVN
>BMB171_C4855_HK_Classic|Bacillus_thuringiensis_BMB171|Pair_BMB171_C4856|HisKA_247-304/BMB171_C4856_RR_OmpR|Bacillus_thuringiensis_BMB171|Pair_BMB171_C4855|Response_reg_3-112	-QKDFLDRITHELKTPLTAIIGYVDLIPKSKEDVQESLRYVAVESERLLSLVEELLKSSKY---ILVVDDESSIRNLIRMQLEMEGY-EVLAAADGREALEKWNEG-PDVLILDVMLPDTDGYELLRLFRERDRDIPVLMLTAKSQMNDKLLGLQLGADDYVTKPFNYAELILRV-
>DehalGT_0560_HK_Classic|Dehalococcoides_sp._GT|Pair_DehalGT_0559|HisKA_632-697/DehalGT_0559_RR_RpfG|Dehalococcoides_sp._GT|Pair_DehalGT_0560|Response_reg_8-114	SLGELSAGLAHELNNPLTSVLGFSELIQELPEDLRQDIQIISQEAQRAAEIIRNLLTFARRH--VLTVDDEDTIRRLLYQKITSEGY-KCLTASNATEAMEIVKNHDIALAILDIKMPGLSGMDILPEIRIVSPDTAVIMATAISDTDTAINCMKLGAYDYVTKPFKLDAV-----
>DehalGT_1289_HK_Classic|Dehalococcoides_sp._GT|Pair_DehalGT_1288|HisKA_369-425/DehalGT_1288_RR_OmpR|Dehalococcoides_sp._GT|Pair_DehalGT_1289|Response_reg_3-114	-------ALVHELRTPLTPIILASDALHSVDNKLKSLVNNINNGASELNTRISELLDLARGE---LIIEDDPQIIDAISSVLKWSNI-RVLSSTSGKGGIELVESQNPDAVLLDLGLPDIDGFDVLRQIRAFS-LVPIIIITVCEDENILVKAFELDANDYLVKPFRQLELIARL-
>DehalGT_1314_HK_Classic|Dehalococcoides_sp._GT|Pair_DehalGT_1313|HisKA_302-365/DehalGT_1313_RR_OmpR|Dehalococcoides_sp._GT|Pair_DehalGT_1314|Response_reg_4-114	-RNYFMRALVHELKTPLTPLLASSEYLSESDSTLLGYARNMQNGAINLNNKIDDLMNLAKGE---LIIEDDLSIIDLVALTFSWPDI-QIVRTQLGKEGIELAETEAPDFIILDLGLPDMSGVEVLQEIRSFS-KVPIIVLTVKKDEMDVVVALSKGADEFISKPFRQMELISRV-
>DehalGT_1348_HK_Classic|Dehalococcoides_sp._GT|Pair_DehalGT_1349|HisKA_168-231/DehalGT_1349_RR_OmpR|Dehalococcoides_sp._GT|Pair_DehalGT_1348|Response_reg_3-114	---TFTRALVHELKTPLTSMLATSELLSKLAEEPNLYMKCLYAGIQDLNLRIDELLDIARGE--ILIIEDDYKIVQAISFALKICWPDATLSASRGENGLKIIEEQSPNLIILDLSLPDMDGLEVLKDARLFC-DTPIIILTVRAEESDVVEALELGANEYIIKPFRQMELLARIR
>Kole_0009_HK_Classic|Kosmotoga_olearia_TBF_19.5.1|Pair_Kole_0010|HisKA_674-735/Kole_0010_RR_CheY|Kosmotoga_olearia_TBF_19.5.1|Pair_Kole_0009|Response_reg_6-115	ALGEMSAKVAHEIRNPITIISGFTRRIARDREKIQQYVEILNRELERLETIVNDVLDYSRR---IMIVDDEENMRFLLTEELGEEGF-HVITAASAEEALDLFEKHPISLVTIDIEMPGISGLELAGMLRNKKPDLKIVLLTAYTH--YKQDMASWAADAYVVKSTDLREFKETI-
>Kole_0110_HK_Classic|Kosmotoga_olearia_TBF_19.5.1|Pair_Kole_0111|HisKA_321-388/Kole_0111_RR_RpfG|Kosmotoga_olearia_TBF_19.5.1|Pair_Kole_0110|Response_reg_34-147	-KSEFLATMSHELRTPLNSITGFVSMILQINEEQRKQLSMVHSSSIHLLNLINDILDISKIEAGILAVDDNKENIYMLETLFKSYGY-EVESSQNGVEALEKLAEQDFDVVISDILMPEMDGFQLCRRVKMDDKEIPFILYTAYTDPEDRKFALSLGVDRFIIKPLEPDAFVKIV-
>Kole_0550_HK_Classic|Kosmotoga_olearia_TBF_19.5.1|Pair_Kole_0551|HisKA_231-296/Kole_0551_RR_OmpR|Kosmotoga_olearia_TBF_19.5.1|Pair_Kole_0550|Response_reg_3-113	SQKQFSANAAHDLRTPLTSIKGIIDVLNRDALEYKDSLIQIRKQVERMSKLVDTLLIVARFDS-ILLVEDEEAITEFVKKGLSEEGY-IVDTVDNGEDALNKIFDVDYDLIILDIMLPVKDGLKVCREVRENGISTPILMLTALDSTEDKVTGLNAGADDYLVKPFSFSELLARIR
>Kole_0705_HK_Classic|Kosmotoga_olearia_TBF_19.5.1|Pair_Kole_0706|HisKA_104-171/Kole_0706_RR_OmpR|Kosmotoga_olearia_TBF_19.5.1|Pair_Kole_0705|Response_reg_3-113	AKTDFVNFFVHEISTPLAVVSGYAQLIFDP-PELSEAASGILKSSERLSKLIEELGELANIEL-ILVVDDDPDILNIVKTACEQECF-NVRTANSARNMWEALENDPPDLIVLDIMLPDASGLDVIKKLKRKYEEIPVIFLTARKSDLDMILGLELGADDYITKPFNPRTLIARIK
>Kole_0837_HK_Classic|Kosmotoga_olearia_TBF_19.5.1|Pair_Kole_0838|HisKA_191-255/Kole_0838_RR_OmpR|Kosmotoga_olearia_TBF_19.5.1|Pair_Kole_0837|Response_reg_4-113	-LRIFISQMTHQLKTPLASMKLMIELLSDDPEKKREFLERSLAEQNKMEWLIQTLLDISRLE--ILLVEDDETLAMGIKYALEQEAF-LVEVATELESARKRIDEKDFDLILLDVMLPNGNGFQLCKEIRTYS-DLPIIFLTARDEEVNIVMGLELGADDYITKPFKLKELVARIR
>Kole_0916_HK_Classic|Kosmotoga_olearia_TBF_19.5.1|Pair_Kole_0915|HisKA_224-287/Kole_0915_RR_OmpR|Kosmotoga_olearia_TBF_19.5.1|Pair_Kole_0916|Response_reg_5-116	-QEQFSSDVAHEIRSPLTAILGFSRMIQRDPEIVEESAKNIAETAAKMLTLTEGLLFLSK----VLLVEDDPHIRKFIQLELEHEGY-EVKTAVTGPQALDELEKELPDVVLLDVMLPEMNGFTVLERIREDFTELPVIMLTARGELEDRVRGLKSGADDYIVKPFHIEELLARL-
>Kole_1428_HK_Classic|Kosmotoga_olearia_TBF_19.5.1|Pair_Kole_1429|HisKA_224-286/Kole_1429_RR_OmpR|Kosmotoga_olearia_TBF_19.5.1|Pair_Kole_1428|Response_reg_3-114	----LSAKIAHELRTPLSVLKSTLQLLARSVDSMKRSLKESLRELDNLIQTSNDLLLISNIEKGILVVEDNKKLAENIKKYLELEGF-IVDLAYDGNEGLDLALSYNYDCIILDIILPGMSGIEICRFLRDEESQVPILMLTALGSVENRVEGLNVGADDYMPKPFDLRELVARVR
>Kole_1572_HK_Classic|Kosmotoga_olearia_TBF_19.5.1|Pair_Kole_1571|HisKA_186-253/Kole_1571_RR_OmpR|Kosmotoga_olearia_TBF_19.5.1|Pair_Kole_1572|Response_reg_6-118	MRREFVSNVSHELRTPLTSIHGYAETLLEDEETVRKFLRIIEGESARMTRLINDLLDLEKLEAGILVIDDEPSIVELLSFNLKKEGY-DVLKAYDAEEALKIVEDNDVDMFIVDIMLPGMDGFELVRNLRSTERHTPVIFLSAKSEEFDKVLGLELGADDYITKPFSVREALARI-
>Kole_1593_HK_Classic|Kosmotoga_olearia_TBF_19.5.1|Pair_Kole_1592|HisKA_224-274/Kole_1592_RR_NtrC|Kosmotoga_olearia_TBF_19.5.1|Pair_Kole_1593|Response_reg_5-113	----SVADLAHGLKQPLATIQLTFDMYIR--TKDEKYLEQLKRNLSEFREKIAAV----------LVVDDDMAFNLILCEALESEGY-LVTKAHDLKSAKELLQEESFDCALLDIRLPDGDGIELIDFARSQE--TIVIVMSAHGNIETAVSAVKKGAYNFLEKPFDLNH------
>Kole_1858_HK_Classic|Kosmotoga_olearia_TBF_19.5.1|Pair_Kole_1857|HisKA_226-280/Kole_1857_RR_OmpR|Kosmotoga_olearia_TBF_19.5.1|Pair_Kole_1858|Response_reg_3-113	-------SAAHELKTPLANIIGYVGMLRRHEDIAYESLERIERTAIELNDLVSKFLNL------VLVVEDDEGLRRLLNLELTHYGY-EVKTSGKGIDALRMYRDFCPDIVLLDILLPQLDGFELLVAFREIFPGAGIIILSVINDKESKLKAFRLGVDDYVTKPFDMEELLARIE
>NMBM01240355_0111_HK_Classic|Neisseria_meningitidis_M01-240355|Pair_NMBM01240355_0112|HisKA_483-551/NMBM01240355_0112_RR_PrrA|Neisseria_meningitidis_M01-240355|Pair_NMBM01240355_0111|Response_reg_6-117	-WGEVAKRLAHEIRNPLTPIQLSAERLAWLDEQDAQSTDTIVKQVAALKEMVEAFRNYARS---ILIVDDEIGIRDLLSEILQDEGY-SVALAENAEEARKLRHQARPAMVLLDIWMPDCDGITLLKEWAKNGLNMPVVMMSGHASIDTAVEATKIGALDFLEKPISLQKLLSAV-
>FIC_00036_HK_Classic|Flavobacteriaceae_bacterium_3519-10|Pair_FIC_00035|HisKA_519-587/FIC_00035_RR_CheY|Flavobacteriaceae_bacterium_3519-10|Pair_FIC_00036|Response_reg_3-113	-KDDFIKMASHELKTPVTTIKGYVQLLKRDDKFLVNSLNTIENQVNNLSVLIGDLLDISRMENGILVVDDNKDICTLIENILLSEGY-DVQTCCNPLEVSTIIKDTRPALIITDMLMSGFDGRTLTKEVKADPEHIKIMMMSAHPDAESISR--SIGVDDFLTKPFEIDDLVNKV-
>FIC_01009_HK_Classic|Flavobacteriaceae_bacterium_3519-10|Pair_FIC_01008|HisKA_658-725/FIC_01008_RR_CheY|Flavobacteriaceae_bacterium_3519-10|Pair_FIC_01009|Response_reg_4-116	-KDDFLDSVAHELRTPITAIRATSELLMDPTEIKKDFLENIISESDRLAEIINDILYLDKLEAGILIADDEHKIIMTLEYAFRKAGY-EVYIARDGAEVLEIIKTEIPDIILLDIMMPNVDGYTTLSEIRKDKENIKVVFLSAKTGEADIKKGLERGADAYVTKPYSIKKLTEKVE
>FIC_01552_HK_Classic|Flavobacteriaceae_bacterium_3519-10|Pair_FIC_01551|HisKA_413-481/FIC_01551_RR_CheY|Flavobacteriaceae_bacterium_3519-10|Pair_FIC_01552|Response_reg_6-116	-KDTFLGIASHELKTPLTSLKLYAQVLERGDQKHADLAKKMDLQVVKLTSLIADLLDVTKINAGIIIVDDDTAILDSLSVMLDYEGF-DVNAFQRGTEIFPFVESVSPDLILLDIWLSGEDGRDICKKLKENEKNIPVVMMSAGRD--LEKAAYNSGATAFISKPFEIEEVVDT--
>FIC_01782_HK_Classic|Flavobacteriaceae_bacterium_3519-10|Pair_FIC_01783|HisKA_119-185/FIC_01783_RR_OmpR|Flavobacteriaceae_bacterium_3519-10|Pair_FIC_01782|Response_reg_8-120	--KEYLGNVSHELKTPLFSIQGYVETLIDL-AIRDKYLERIDKSVERLLNIVKDLDMINQY---ILLIDDEQDILEILSYNLQKEGY-EVHTAQNGNEGIQKAKEIVPDLILLDVMMPEKDGIETCQDLRKLPQKTLIVFLSARSEEFSQLAGFQAGANDYIVKIIKPKVLISKVN
>FIC_02421_HK_Classic|Flavobacteriaceae_bacterium_3519-10|Pair_FIC_02420|HisKA_291-356/FIC_02420_RR_OmpR|Flavobacteriaceae_bacterium_3519-10|Pair_FIC_02421|Response_reg_5-115	-KTDFINNMSHEFKTPLATISVATDSLANNPEKVKYYSGLIKQENLRMKKQVENVLNMSKLER-ILLVEDDQSFGAVLKDYLSINNF-EVTLATDGEQGLKEFTENEFDICIFDVMMPKKDGFSLAEDVKRIDKNTPIIFLTARNMREDILKGYQLGADDYITKPFDTELLLYKI-
>ACP_0181_HK_Classic|Acidobacterium_capsulatum_ATCC_51196|Pair_ACP_0180|HisKA_674-736/ACP_0180_RR_NtrC|Acidobacterium_capsulatum_ATCC_51196|Pair_ACP_0181|Response_reg_23-133	--GLLAAGVAHEVNTPLAVISSYTQMLSKGDDRLSPLLDKITQQTFRASEIVNGLLNFSRTG--ILIIDDEAALRETLEALLSLEGY-EVETAIHGEAGLEKIDRNSYDLVLLDLALPGKNGIEILGLIRDRNADLPVIMITAFGTVDNVMDAMRAGAQNFIQKPWDNEKLLADI-
>ACP_0678_HK_Classic|Acidobacterium_capsulatum_ATCC_51196|Pair_ACP_0677|HisKA_412-474/ACP_0677_RR_NtrC|Acidobacterium_capsulatum_ATCC_51196|Pair_ACP_0678|Response_reg_27-136	-IGRLTAGVGHEVKNPINAIVVHLELLRNLKEPAQKHLDIIQSEIRRLDRVVQTLVDFSR----VLIVEDEPHALTGLAELVSAWDY-RTETARDGIEALEKVRGWQPAIVVTDLKMPRMDGMQLLERLNQMDGSRAVIVLTAQGSIESAVEAMKIGAFDYLQKPVDSVRLRTIL-
>ACP_1260_HK_Classic|Acidobacterium_capsulatum_ATCC_51196|Pair_ACP_1259|HisKA_239-304/ACP_1259_RR_OmpR|Acidobacterium_capsulatum_ATCC_51196|Pair_ACP_1260|Response_reg_3-112	-LSRFSADVSHDLRTSITVMLGTAQLSLRSAQEHRDDLERIVTECRTASTLLDALLSLARSDN-VLLIEDDRRIAQLVERGLREDGH-RVSVTHDGADGARRMLSGEFDAALLDILLPGMSGLEVLERVRAQHCKTPILMLTAVDAVPKVLEAFDLGADDYLVKPFLLEILLARV-
>ACP_1692_HK_Classic|Acidobacterium_capsulatum_ATCC_51196|Pair_ACP_1693|HisKA_531-593/ACP_1693_RR_NtrC|Acidobacterium_capsulatum_ATCC_51196|Pair_ACP_1692|Response_reg_4-105	---EVAQRVAHEIKNPLTPVTLSAERIRRNTPESQQCCDIILSAAESVRRLVDQF---------ILIVDDEAEIRQSLEEILKEEGY-IVTTAATATEARTLLHDAAYDVMLLDIWLPDGDGLDVLANAQTLGSRPEVIVISGHANIATAVKATKLGAFDFLEKPLLLE-------
>ACP_2198_HK_Classic|Acidobacterium_capsulatum_ATCC_51196|Pair_ACP_2197|HisKA_255-323/ACP_2197_RR_PrrA|Acidobacterium_capsulatum_ATCC_51196|Pair_ACP_2198|Response_reg_8-118	SLGTLAAGAAHELGTPLGTIAIVARELERACDDLSEDARLIRSEVERCQRILQGM---------VYVVDDDEVFRNRLARALRQRHW-NAQPAASAEEAWALARQQTPDLVLLDLRMPGMGGLELIEKLRALDATMKIIMLTGYGSIPTTITALKRGADDYLSKPADADQIVAAY-
>ACP_2690_HK_Classic|Acidobacterium_capsulatum_ATCC_51196|Pair_ACP_2691|HisKA_242-308/ACP_2691_RR_OmpR|Acidobacterium_capsulatum_ATCC_51196|Pair_ACP_2690|Response_reg_3-114	--QIFLHNAAHELKTAVTIVKSSLQLLASSSEDYHAGLNLCLADCGRMEELVQSMLLLARLEQ-ILVVEDEERLAGNIAAAMRGPGW-AVDLAHSGLAGRDLCLQTEYDLVLLDLMLPGLDGLGVLRDMRGKGIATPVLVLTAVAEKASVIELLNAGADDYLAKPFDLGELLARA-
>ACP_2863_HK_Classic|Acidobacterium_capsulatum_ATCC_51196|Pair_ACP_2862|HisKA_257-308/ACP_2862_RR_OmpR|Acidobacterium_capsulatum_ATCC_51196|Pair_ACP_2863|Response_reg_3-113	---TMTDALAHDMRSPITAIRGRLEALLRLCEVLTKSLDVAEASAD-------------------LVVEDDVANAQFLERALAENGY-NIDLAHNAAAAERLALEGGHAVIILDLGLPDEDGLSLITRLKAGGVKAPVLILSARRAVDDRVRGLEQGGDDYLTKPYALPELLARV-
>DP0375_HK_Classic|Desulfotalea_psychrophila_LSv54|Pair_DP0376|HisKA_343-409/DP0376_RR_NtrC|Desulfotalea_psychrophila_LSv54|Pair_DP0375|Response_reg_4-113	ALGKMASGIAHEIRNPLGTLRGFAYFFGKASEETKEYSQLMVAEIDRLNRIVSGLLQFSRPR--ILLVDDDKGHRTMLKVNLGELGY-QVITAGDGDEVLAKLTKNKIDLILLDMKMPRIDGLATLSLLSQQNNRIPVIVITAFSSMENAIEAMKKGAFDYVTKPVDIDNLHIAI-
>DP0601_HK_Classic|Desulfotalea_psychrophila_LSv54|Pair_DP0600|HisKA_244-305/DP0600_RR_OmpR|Desulfotalea_psychrophila_LSv54|Pair_DP0601|Response_reg_3-113	-----LDNVAHDLRTPIARLRSTAEYLQGL-PRLQDALANCLEESEQISAILRIMMSVAEAESG-LLIEDDLTIADLIQKGLEEAGF-AVDSCHNGREGLSHALKGAYSAAIIDIMLPERDGLSIIEEMRAAGKETPVLILSAKQSVDDRIQGLQRGGDDYMIKPFSFGELLVRV-
>DP0954_HK_Classic|Desulfotalea_psychrophila_LSv54|Pair_DP0953|HisKA_180-249/DP0953_RR_NtrC|Desulfotalea_psychrophila_LSv54|Pair_DP0954|Response_reg_8-118	--GTLAAGIAHEINNPLTSISGFAQGLQRLVADFDEYTETIITECLRCRDIVKTLLTFSR----ILVIDDERSIRRLLEKELRSPER-KILLAECGKEALELASQNQIDVIIMDLRLPDVEGLDLLVQMKEQISHAQIIMISGHGDVDTAVKAMKFGICDFIQKPFDLDKLDL---
>DP1041_HK_Classic|Desulfotalea_psychrophila_LSv54|Pair_DP1040|HisKA_259-319/DP1040_RR_NtrC|Desulfotalea_psychrophila_LSv54|Pair_DP1041|Response_reg_5-108	---LLAAEIAHELGTPLNVVDGRAKMIIRNPQEIKECATIIKSQSERMAVIIRQLLEFTR----ILIIEDDQDMCDMLAMGLRRRGF-AVSTYISGQEGLAAINPETTDVVLSDINLPDANGLDICKEVVANTPDIPVIIMTAFGSMDTAISAIRSGAYDFVTKPLDIDILA----
>DP1886_HK_Classic|Desulfotalea_psychrophila_LSv54|Pair_DP1885|HisKA_374-438/DP1885_RR_OmpR|Desulfotalea_psychrophila_LSv54|Pair_DP1886|Response_reg_6-120	-RRDFVANVSHELRTPITAIRGYVETLLDQKEDARRFLAIVLRQSSRLSDIINDLLALSRIE--ILIVEDEADIQQLVSYNLVRAGF-NVTCADSGEEALGCLAREAFDCILLDIMLPGISGLEVCQSIRQNEAGSPIIMMTAKGEEEDIIDGLEKGADDYITKPFSPKVLVARV-
>DP2722_HK_Classic|Desulfotalea_psychrophila_LSv54|Pair_DP2721|HisKA_331-400/DP2721_RR_NtrC|Desulfotalea_psychrophila_LSv54|Pair_DP2722|Response_reg_4-114	--GTMSASIAHEFRNPLTAISGSAQILEEETTISYELCAIILRESDRLLETISNFLIFAKPEH-ILVVDDERSMREFFKILLHKEGY-KAYTTANINEAREIFSQEPIDLIITDIRMPSGSGFDLLENIREENPHIPIILITAFTEPNDALRAMKNGAFDYISKPFNIEEIKSVV-
>DP2822_HK_Classic|Desulfotalea_psychrophila_LSv54|Pair_DP2823|HisKA_531-599/DP2823_RR_NtrC|Desulfotalea_psychrophila_LSv54|Pair_DP2822|Response_reg_5-114	--REVARRIAHEIKNPLTPIQLSAQRLRRYPEILKECTSTIISQVDELKTLVSEFSQFARM---VLIIDDEASIRITLQGILEDEGF-QTLACASAEEGIELLEKEIIDIVLLDIWLGDMDGLTALEIIHERF-SLPVIMISGHGNVETAVQATKKGAFDFIEKPLSYEKILVAI-
>SPUL_1962_HK_Classic|Salmonella_enterica_subsp._enterica_serovar_Gallinarum/pullorum|Pair_SPUL_1961|HisKA_231-297/SPUL_1961_RR_OmpR|Salmonella_enterica_subsp._enterica_serovar_Gallinarum/pullorum|Pair_SPUL_1962|Response_reg_3-112	-LNQFADDLAHELRTPVNILLGKNQVMLSSAEEYQQALVDNIEELEGLSRLTENILFLARAEH-ILLIEDNQKTIEWVRQGLTEAGY-VVDYACDGRDGLHLALQEHYSLIILDIMLPGLDGWQVLRALRTAH-QSPVICLTARGSVEDRVKGLEAGANDYLVKPFSFAELLARVR
>SPUL_4577_HK_Classic|Salmonella_enterica_subsp._enterica_serovar_Gallinarum/pullorum|Pair_SPUL_4576|HisKA_257-319/SPUL_4576_RR_OmpR|Salmonella_enterica_subsp._enterica_serovar_Gallinarum/pullorum|Pair_SPUL_4577|Response_reg_8-116	----YVYALTHELKSPLAAIRGAAEILREPADVVTRFTENILAQNTRMQALVETLLRQARLEN-VWLVEDEQGIADTLIYTLQLEGL-TVELFARGLPALEKARQQRPDAVILDVGLPDISGFELCRQLLERHPALPILFLTARSDEVDRLLGLEIGADDYVAKPFSPREVSARV-
>Entcl_0059_HK_Classic|Enterobacter_cloacae_SCF1|Pair_Entcl_0060|HisKA_229-292/Entcl_0060_RR_OmpR|Enterobacter_cloacae_SCF1|Pair_Entcl_0059|Response_reg_3-113	-QQRFIADAAHELRTPLTALSLQAERLAGMSPEAQSRLDALRQGLKRAHHLLEQLLALAREQQ-ILLVEDDPMVGEVLESSLKDASY-AVDWVKNGDDALAGFAAQPYDVVLLDLGLPGKDGFTVLDGLRRKDAAVPVLILTARDALADRLKGLDGGADDYILKPFEMSELLARIR
>Entcl_0729_HK_Classic|Enterobacter_cloacae_SCF1|Pair_Entcl_0730|HisKA_239-302/Entcl_0730_RR_OmpR|Enterobacter_cloacae_SCF1|Pair_Entcl_0729|Response_reg_3-113	--RRFTSDAAHELRSPLTALKVQTEVAQLDPESREKALSQLHAGIDRATRLVEQLLTLSRLDS-ILLVEDDKLIGDGLRAGLVKMGF-TLDWFTRGEEGKAALLAAPYDAVILDLTLPGIDGLDILRAWRAQGRQEPVLILTARDALAQRVEGLRLGADDYLCKPFALIEVAARL-
>Entcl_1468_HK_Classic|Enterobacter_cloacae_SCF1|Pair_Entcl_1467|HisKA_246-306/Entcl_1467_RR_OmpR|Enterobacter_cloacae_SCF1|Pair_Entcl_1468|Response_reg_3-113	-QERFSADASHQLKTPLAILKTQASVALTQPQAWRESLEAMSHTLDNTIQLTERLLQLS------LLAEDNRELAHWLEKALVQGGF-AVDAVSDGRAADHLLQSEKYALAVLDIGMPGLDGLEVVQRLRRRGQTLPVLLLTARSAVADRVVGLNAGADDYLPKPFELEELDARL-
>Entcl_1616_HK_Classic|Enterobacter_cloacae_SCF1|Pair_Entcl_1615|HisKA_240-304/Entcl_1615_RR_OmpR|Enterobacter_cloacae_SCF1|Pair_Entcl_1616|Response_reg_13-122	MRRDFMADISHELRTPLAVLRGELEAIQDVRKFTPESVASLQAEVATLTKLVDDLHQLSMSDEGILIVEDEPKLGQLLIDYLLAANY-APTLISHGDKVLPYVHQSPPALILLDLMLPGTDGLTLCREIRRFS-DVPIVMVTAKIEEIDRLLGLEIGADDYICKPYSPREVVARV-
>Entcl_2024_HK_Classic|Enterobacter_cloacae_SCF1|Pair_Entcl_2025|HisKA_249-314/Entcl_2025_RR_OmpR|Enterobacter_cloacae_SCF1|Pair_Entcl_2024|Response_reg_3-113	-LNRFSSDIAHELRGPINNLISAASVTQASSQEYQETLAAIVEEGERLSRMISSMLFLARADN-ILLVEDQKMASEYIAKGLTENNF-VVDVAQNGVDGLHYLLTNDYNLAILDVMLPGIDGWKIIEMARQAGKQTPIMFLTARDDVEDRVRGLELGAEDYLIKPFSFSELLARA-
>Entcl_2149_HK_Classic|Enterobacter_cloacae_SCF1|Pair_Entcl_2150|HisKA_353-421/Entcl_2150_RR_NarL|Enterobacter_cloacae_SCF1|Pair_Entcl_2149|Response_reg_2-111	-LGEMASGFAHELNQPLSAIRMYAQGCLREPQPVREAIDQIEKQAGRGGDIIRNLRQWASGENGIHLVDDDEAVTDACRFLLAAMGY-EVQCWNNSGAFLAQAGLHQEGVALLDMRMPPPDGHAIFAHLRRERSTLAVVFLTGHGDVGMAVEEMKLGAVDFLQKPVAQEPLRAAI-
>Entcl_2236_HK_Classic|Enterobacter_cloacae_SCF1|Pair_Entcl_2237|HisKA_211-269/Entcl_2237_RR_OmpR|Enterobacter_cloacae_SCF1|Pair_Entcl_2236|Response_reg_7-113	SKKQLIDGIAHELRTPLVRLRYRLEMSENLSEAE---SQALNRDIGQLEALIQELLTYARLDR-IVFVEDDPEVGSLIAAYLNKHDM-DVIVEPRGDRAEEVVLREDPDLVLLDIMLPGKDGMTICRDLRAQW-QGPIVLLTSLDSDMNHILSLEMGASDYILKTTPPAVLLARL-
>Entcl_2665_HK_Classic|Enterobacter_cloacae_SCF1|Pair_Entcl_2664|HisKA_272-330/Entcl_2664_RR_OmpR|Enterobacter_cloacae_SCF1|Pair_Entcl_2665|Response_reg_3-113	----TLTDLTHSLKTPLAVLQSTLRSLRGLTVEDAE--PVMLEQISRISQQIGYYLHRASMRS-VLVVEDNALLRHHLKVQLQELGH-QVDAAEDAKEADYYLGEHVPDIAIVDLGLPDEDGLSMIRRWRSHDVSLPILVLTAREGWQDKVEVLGAGADDYVTKPFHIEEVAARI-
>Entcl_2952_HK_Classic|Enterobacter_cloacae_SCF1|Pair_Entcl_2953|HisKA_268-336/Entcl_2953_RR_OmpR|Enterobacter_cloacae_SCF1|Pair_Entcl_2952|Response_reg_7-117	-RREFIANISHDLRTPLTSLLGYLETLSMSPEDNRQYLAIALRQGHKVRHLSQQLFELARLEHGILLVEDDRDIATLLRLNLQDEGY-KIVHEADGARALALLDKQVWDAVILDLMLPHVDGLEICRRIRQMARYLPVIIISARTSETHRVLGLEMGADDYLPKPFSVLELIARV-
>Entcl_3044_HK_Classic|Enterobacter_cloacae_SCF1|Pair_Entcl_3043|HisKA_146-203/Entcl_3043_RR_OmpR|Enterobacter_cloacae_SCF1|Pair_Entcl_3044|Response_reg_3-113	--RMFTADVAHELRTPLAGLKLHLELMAK---VHGVKVEPLLQRLDQMTDSITQLLQLARV---VLVVEDDSLLLQGLILAMQSEGY-VCDGVTTAHEAALCLANSHYSLMVLDLGLPDEDGLDFLSRIRREKFSLPVLILTARDTVNDRIEGLDTGADDYLVKPFALEELNARV-
>Entcl_3122_HK_Classic|Enterobacter_cloacae_SCF1|Pair_Entcl_3123|HisKA_663-729/Entcl_3123_RR_OmpR|Enterobacter_cloacae_SCF1|Pair_Entcl_3122|Response_reg_4-113	-RNSLLAALSHDLRTPLTVLFGQAEILLDEGSKHAPQANEIRQHVLNTTRLVNNLLDMARIQSGVLIIEDEQAIRRLLRSALEGDGL-RVHEAETLQRGLLEAATRKPDLVILDLGLPDGDGIDFIRDFRQWS-QVPIIVLSARAEETDKITALDAGADDYLSKPFGIGELQARL-
>Entcl_3254_HK_Classic|Enterobacter_cloacae_SCF1|Pair_Entcl_3253|HisKA_260-326/Entcl_3253_RR_OmpR|Enterobacter_cloacae_SCF1|Pair_Entcl_3254|Response_reg_3-113	--ANFSADLAHEIRTPITNLVTQTEIALSTTKELEDVLYSSLEEYNRMAKMVSDMLFLAQADN-ILIVEDEVKTGEYLSKGLTEAGF-VVDLADNGLTGYHLAMTADYDLIVLDIMLPDVNGWDIVRMLRTANKGMPILLLTALGTIEHRVKGLELGADDYLVKPFAFAELLARVR
>Entcl_3419_HK_Classic|Enterobacter_cloacae_SCF1|Pair_Entcl_3420|HisKA_203-268/Entcl_3420_RR_OmpR|Enterobacter_cloacae_SCF1|Pair_Entcl_3419|Response_reg_5-117	ARRNFFANVSHELRTPLTVLQGYLEMMQEEGAPREKALHTMREQTQRMEGLVRQLLTLSKIEA-ILVVEDEAPIREMVCFVLEQNGF-QPVEAEDYDSAVTQLNEPWPDLILLDWMLPGGSGIQFIKHLKREARDIPVVMLTARGEEEDRVRGLETGADDYITKPFSPKELVARIK
>Entcl_4156_HK_Classic|Enterobacter_cloacae_SCF1|Pair_Entcl_4155|HisKA_250-312/Entcl_4155_RR_NtrC|Enterobacter_cloacae_SCF1|Pair_Entcl_4156|Response_reg_7-116	ALGHLAAGVAHEIRNPLSSIKGIAKYFAEEGGEPHELARVMAKEADRLNRVVSELLELVK----VLVVDDDVSHCTILQALLRGWGY-QVAIANSGKEALRQVREHVFDVVLCDVRMAEMDGIDTLKEIKALNPAIPVLIMTAFSSVETAVEAIKSGALDYLIKPLDFDRLQETL-
>Entcl_4350_HK_Classic|Enterobacter_cloacae_SCF1|Pair_Entcl_4349|HisKA_238-299/Entcl_4349_RR_OmpR|Enterobacter_cloacae_SCF1|Pair_Entcl_4350|Response_reg_4-112	SQQRLLSDISHELRTPLTRLQLGTALLRR-RAGESKELERIETEAHRLDSMINDLLVMSRNQA-ILLVDDDRELTSLLKELLDMEGF-NVLVAHDGEQALALLDDS-IDLLLLDVMMPKKNGIDTLKELRQTH-QTPVIMLTARGSELDRVLGLELGADDYLPKPFNDRELVARIR
>Entcl_4385_HK_Classic|Enterobacter_cloacae_SCF1|Pair_Entcl_4386|HisKA_131-186/Entcl_4386_RR_NtrC|Enterobacter_cloacae_SCF1|Pair_Entcl_4385|Response_reg_8-116	--RDLVRGLAHEIKNPLGGLRGAAQLLSKPDPSLMEYTNVIIEQADRLRNLVDRLL--------VWIVDDDSSIRWVLERALSGAGL-SCTTFENGNEVLDALASKTPDVLLSDIRMPGMDGLALLKQIKQRHPMLPVIIMTAHSDLDAAVSAYQQGAFDYLPKPFDIDEAVALV-
>AMEC673_01920_HK_Classic|Alteromonas_macleodii_str._English_Channel_673|Pair_AMEC673_01915|HisKA_239-301/AMEC673_01915_RR_OmpR|Alteromonas_macleodii_str._English_Channel_673|Pair_AMEC673_01920|Response_reg_25-135	-QKRLLADVSHELRSPLARLQMALGLAHQ-QNVDPATLSRVEREADRMEALVSQLLTLSRAEAGILVIDDDLELTEMLSTYLSSMGY-QVQVRNDGEEGLSEASGRHYDLVLLDVMMPKMDGFDVLKKLRVSH-STPVLMLTARGDDYDRILGLEMGADDYLPKPFNHRELVARIK
>AMEC673_02675_HK_Classic|Alteromonas_macleodii_str._English_Channel_673|Pair_AMEC673_02670|HisKA_225-289/AMEC673_02670_RR_OmpR|Alteromonas_macleodii_str._English_Channel_673|Pair_AMEC673_02675|Response_reg_4-113	--REFVNHASHELRTPIAVIRSSAALLHRENTKGNNALARVDHASKTMADLTETLLWLGRNEE-VLLVEDDMGLAGNIIDYLELEDM-VCDHAANGVAALSLIQKHPFDVVVLDINLPRLDGLSVCERVREDGNDTPIIMLTARDQLENKLEGFQKGADDYLVKPFDMPELVARV-
>AMEC673_03850_HK_Classic|Alteromonas_macleodii_str._English_Channel_673|Pair_AMEC673_03845|HisKA_257-320/AMEC673_03845_RR_OmpR|Alteromonas_macleodii_str._English_Channel_673|Pair_AMEC673_03850|Response_reg_3-113	--KRLTSDIAHELKTPVSELINLAEVAMKE-ERLEKFKPQILRIGMRMKNIISGLMLIQK----ILLIEDSLSLRNSLSLGLEKLGH-SVDLAATGPDGLSMALLGSYDIIVLDRMLPELDGMAILKTLRKRRVETKVLILSARAEPEEKVEGLLAGADDYLSKPFSFEELSARL-
>AMEC673_04060_HK_Classic|Alteromonas_macleodii_str._English_Channel_673|Pair_AMEC673_04055|HisKA_226-285/AMEC673_04055_RR_OmpR|Alteromonas_macleodii_str._English_Channel_673|Pair_AMEC673_04060|Response_reg_4-114	--QAFARYASHELRTPLTIVKGANNLLSRLTEWQERQVARINDAVSEMIKMVDALLSIVRYE--ILLIEDSREVAGILFEYYESKGV-ELDYADNGELGFELAKAESFDLILLDLMLPRMDGLTLCNKLRDEGITTPILMLTALDNREDMLNGFKHGADDYLTKPFDFDLLDAR--
>AMEC673_04915_HK_Classic|Alteromonas_macleodii_str._English_Channel_673|Pair_AMEC673_04920|HisKA_153-219/AMEC673_04920_RR_NtrC|Alteromonas_macleodii_str._English_Channel_673|Pair_AMEC673_04915|Response_reg_6-115	SLGKMVASLAHQIRTPLSAAMLYASNLTRGQEAQTQFANKLTDRLKELESQVNDMLLFAKSGE-ILIVEDDVGLREALLDTLLLGNY-EVVAADCAEEALMVLSSRSVDLVVSDIQMGEMSGLTLLKSIKTKYPNMPVLLMTAYATIDDAVQAMRDGATDYLSKPFAPEVLLNL--
>AMEC673_06385_HK_Classic|Alteromonas_macleodii_str._English_Channel_673|Pair_AMEC673_06390|HisKA_117-184/AMEC673_06390_RR_OmpR|Alteromonas_macleodii_str._English_Channel_673|Pair_AMEC673_06385|Response_reg_5-114	--SSVLRSVSHDLRTPLSTIIGSVETYMTDDIERQALLKGVHDEGKRLYVYVENLLQATRIEH-ILLVEDDANIRQMLSIALGAEGY-LCVEAASVREALSLFNQHRPDLVILDLGLPDGEGSEVLKRIRESS-RLPVLVLSARDQELDKVDLLSRGANDYVSKPFGIRELVTRVK
>AMEC673_06495_HK_Classic|Alteromonas_macleodii_str._English_Channel_673|Pair_AMEC673_06500|HisKA_248-288/AMEC673_06500_RR_OmpR|Alteromonas_macleodii_str._English_Channel_673|Pair_AMEC673_06495|Response_reg_3-111	-----LGDLAHSLKTPLAVASGTSDLPTEVNEALQQIDRIIKRQLKRAS---------------ILVAEDDSRLLTQLDALLQQNGY-SVDLADNGEHALFLIKEYSYDLAIVDIGMPKLDGFEVIRKARQADSSCPILILTARDRWQEKVEGLDAGADDYLTKPFHNEELLART-
>AMEC673_07945_HK_Classic|Alteromonas_macleodii_str._English_Channel_673|Pair_AMEC673_07940|HisKA_296-361/AMEC673_07940_RR_OmpR|Alteromonas_macleodii_str._English_Channel_673|Pair_AMEC673_07945|Response_reg_3-112	-RRQFMADVSHELRTPLTIIRGEAQVTLRSNEIYKETLETILEQAVNLSKLVDDLLLLARAE--ILIADDEAPLLRFLSRGLSAEGF-ECIEESALHNLVTRIRHEAPAIIVLDRMFGDEDSVELLPAIKSLPHAPMVLLLTAVDEVRERVNGLKQGADDYLCKPFDFDELLARI-
>AMEC673_10000_HK_Classic|Alteromonas_macleodii_str._English_Channel_673|Pair_AMEC673_10005|HisKA_230-291/AMEC673_10005_RR_OmpR|Alteromonas_macleodii_str._English_Channel_673|Pair_AMEC673_10000|Response_reg_6-115	-QRELLSDLSHELRTPLTRMDMAIDTIEN-GINDSDTLTRLRYESNNMRALVEDTLTLAWLNN-ILIIEDDITLNKQIAALLKDRGF-DVHQCHDGNQGLVTALRERFDLILLDVLLPNLNGFSLLSQLRKRK-QTPVIMVTACGAEQERIKGYSNGADDYMPKPFSFVEMMLRI-
>AMEC673_14895_HK_Classic|Alteromonas_macleodii_str._English_Channel_673|Pair_AMEC673_14890|HisKA_260-306/AMEC673_14890_RR_OmpR|Alteromonas_macleodii_str._English_Channel_673|Pair_AMEC673_14895|Response_reg_3-113	------DSIAHDLRTPLSRLRNTLEKIED-----DQLREDTTQEADNLLNMFNSLLRISGLET-VLLVEDDPKVASHIANGLLGEGH-ECITVGDGTSGYQQASSNELDAVILDVMLPELDGFSVLEKLREEGNTTPVLLLSAKSQVEDKVKGLRTGANDYLTKPFAFEELLARVE
>AMEC673_15330_HK_Classic|Alteromonas_macleodii_str._English_Channel_673|Pair_AMEC673_15335|HisKA_134-188/AMEC673_15335_RR_NtrC|Alteromonas_macleodii_str._English_Channel_673|Pair_AMEC673_15330|Response_reg_8-111	--RELVRGLAHEIKNPLGGIRGAAQLLEKLIDEHKEFTSMIIEQSDRLRNLVDRLLG-------VWIVDDDSSIRWVLQKALQAADI-SCLSFENPEDLLLQLQSGQPEVIISDIRMPQMDGMTLLNEVHASHPMLPVIIMTAHSDLDSAVNAYQKGAFEYLPKPFDIDEAVT---
>AMEC673_15660_HK_Classic|Alteromonas_macleodii_str._English_Channel_673|Pair_AMEC673_15655|HisKA_229-287/AMEC673_15655_RR_OmpR|Alteromonas_macleodii_str._English_Channel_673|Pair_AMEC673_15660|Response_reg_3-112	---AFTDNAAHELRTPLTGIISQLQVAKVQGETQQRAIEKSLFSARRLQSLLENLLLLARVD--ILLVEDDLVIADAVCVYLQSKLM-QVTHAVTLSEAKHYVSINQFDVCLLDIALPDGSGLELLSLVRKKKLPMAIILLTARDAIEDKVTGLNKGADDYVTKPFDFEELIARI-
>AMEC673_17510_HK_Classic|Alteromonas_macleodii_str._English_Channel_673|Pair_AMEC673_17505|HisKA_499-562/AMEC673_17505_RR_OmpR|Alteromonas_macleodii_str._English_Channel_673|Pair_AMEC673_17510|Response_reg_5-116	--ENMASRLSHELRTPIAVVKSSLDMLTQDADQQAVFVERAQSGVNRLSTILNSMSEATRLEQ-IALVEDDAAIRENYIMALKAQGY-SVNAYEDRPSAAEAFNHTLPDLAIIDIGLKDEGGFMLCQQLRGLSQTLPIIFFTARDNDVDTISGLRMGADDYLTKDISMAHLLARI-
>AMEC673_18050_HK_Classic|Alteromonas_macleodii_str._English_Channel_673|Pair_AMEC673_18045|HisKA_230-291/AMEC673_18045_RR_OmpR|Alteromonas_macleodii_str._English_Channel_673|Pair_AMEC673_18050|Response_reg_6-115	-QRSLLADLSHELRTPLARIDMAIDFVEQ-DINREQALSRLRYEASTMRELVEDTLTFAWLNT-ILIVEDDATLSEQITQLLQSRGF-DTRHESDGNAGLQAVLEENFDLVLLDIRLPSLNGLSLLNQLRQIK-QTPVMMITASGAEQERIEGYRKGADDYLPKPFNFTEMMLRI-
>AMEC673_18900_HK_Classic|Alteromonas_macleodii_str._English_Channel_673|Pair_AMEC673_18895|HisKA_230-289/AMEC673_18895_RR_OmpR|Alteromonas_macleodii_str._English_Channel_673|Pair_AMEC673_18900|Response_reg_8-118	---IMTAGISHDLRTPLTRIRLASEML---PEDQDWIKDGIVNDIEDMNAIIDQFIDYARYDT-ILVVDDDMRLRSLLERYLLEQGY-QVRSAANAEQMDRLLERENFHLMVLDLMLPGEDGLSICRRLRQQENDMPIIMLTAKGDEVDRIIGLEMGADDYLPKPFNPRELLARA-
>BT9727_0243_HK_Classic|Bacillus_thuringiensis_serovar_konkukian_str._97-27|Pair_BT9727_0242|HisKA_276-343/BT9727_0242_RR_OmpR|Bacillus_thuringiensis_serovar_konkukian_str._97-27|Pair_BT9727_0243|Response_reg_6-115	-KNELITNVSHDLRTPLTSIMGYLRLLRDNKEQHDEYTKIAFAKSEQLKNLIEDLFEYTKLT--ILVVDDEKEIRNLITIYLKNEGY-KVLQAGDGEEGLRLLEENEVHLVVLDIMMPKVDGIHMCMKVREEK-EMPIIMLSAKTQDMDKILGLTTGADDYVTKPFNPLELIARIK
>BT9727_0254_HK_Classic|Bacillus_thuringiensis_serovar_konkukian_str._97-27|Pair_BT9727_0255|HisKA_111-178/BT9727_0255_RR_OmpR|Bacillus_thuringiensis_serovar_konkukian_str._97-27|Pair_BT9727_0254|Response_reg_6-115	SRKQLLSSISHDIRTPLTSIIGYIDALKDSEIEKQEYLKILYMKSNNLKHLVDEIFNMAKLDA-ILIADDDKEIRNLLKIYLERELY-MVDTAIDGEVALQLFNQNNYSLVILDLMMPKVDGIEVCRKLRDKT-NVPILMLTAKDHEVDKILGLSIGADDYITKPFSIHEVVARV-
>BT9727_0483_HK_Classic|Bacillus_thuringiensis_serovar_konkukian_str._97-27|Pair_BT9727_0482|HisKA_191-258/BT9727_0482_RR_OmpR|Bacillus_thuringiensis_serovar_konkukian_str._97-27|Pair_BT9727_0483|Response_reg_3-112	-QQQFVSDASHELRTPLAVIQSKTDILQSTIEEKAMDISTISKECRRLSKLVANLLLLARSDS--LVVEDNASLLESIVQILR-DEF-EVDTALNGEEGLFLALQNIYDAILLDVMMPEMDGFEVIQKIRDEKIETPVLFLTARDSLEDRVKGLDFGGDDYIVKPFQAPELKARIR
>BT9727_0562_HK_Classic|Bacillus_thuringiensis_serovar_konkukian_str._97-27|Pair_BT9727_0563|HisKA_234-299/BT9727_0563_RR_OmpR|Bacillus_thuringiensis_serovar_konkukian_str._97-27|Pair_BT9727_0562|Response_reg_4-113	-RSEFLASVAHELRTPLTYVRGYADILKESPEQRLRYLSIIKDESDYITNLVQDLFSLAQMEQ-ILLVDDEPRMLELLTLYLTPIGY-NCICARSGEEAISHIENQNFKFILLDIMMPTMDGWETCKKIRSFS-NVPIIMVTARDQTIDVVQGLKLGADDYVTKPFHEEELFARIE
>BT9727_0924_HK_Classic|Bacillus_thuringiensis_serovar_konkukian_str._97-27|Pair_BT9727_0923|HisKA_240-299/BT9727_0923_RR_OmpR|Bacillus_thuringiensis_serovar_konkukian_str._97-27|Pair_BT9727_0924|Response_reg_13-117	--AEWIINISHDLKTPLSSIKGYSEVIGNTAQEMYQYAEVIQNKSIYIEKMIDDLL--------ILIVDDEKEILNLLEAVLKKEGFRHIYTCTTGKGGIHMCRQVQPDLILLDIMLPDLDGYSVCEQIRQFT-FVPIFFLSAKNEDLDKILGLSIGGDDYITKPFSPKEVA----
>BT9727_1716_HK_Classic|Bacillus_thuringiensis_serovar_konkukian_str._97-27|Pair_BT9727_1715|HisKA_150-211/BT9727_1715_RR_OmpR|Bacillus_thuringiensis_serovar_konkukian_str._97-27|Pair_BT9727_1716|Response_reg_6-115	MKNEMISNISHDLRTPVTSLIGYADLLGNNGEECEQYVSILKRKSYELKNQVDDLLEY------ILIVDDDQDIVRFMNVNLMQEGF-KVFSAYNGEEALEIINNNSIQIAILDIMMPQMDGIELCRRIREKH-SLPIIFLSAKSSDVDKVVGFSTGADDYIVKPFSTIEFIARV-
>BT9727_1791_HK_Classic|Bacillus_thuringiensis_serovar_konkukian_str._97-27|Pair_BT9727_1790|HisKA_127-193/BT9727_1790_RR_OmpR|Bacillus_thuringiensis_serovar_konkukian_str._97-27|Pair_BT9727_1791|Response_reg_34-143	MRQEFVSNVSHEIQSPLTSIKGFARALQDPEEKRKHYLTIIETETTRLSKLSQNLLKLTLLES-ILIVDDDPHIRELVSVFLEREGF-QIYEAIDGLDALQKMNEVKVDMVILDIMMPNMDGFDVCFELRKYY-EIPILMLTAKGETSQKVKGFHLGTDDYLVKPFDPIELVVRV-
>BT9727_2379_HK_Classic|Bacillus_thuringiensis_serovar_konkukian_str._97-27|Pair_BT9727_2378|HisKA_131-177/BT9727_2378_RR_OmpR|Bacillus_thuringiensis_serovar_konkukian_str._97-27|Pair_BT9727_2379|Response_reg_4-113	----FMNQWIHQMKTPLSVIE----LITQ--DEVDPRFESINEETDRLKKGLEMALYVARLEA-IMIVEDDMKIAELLSTHVAKYGY-EGIIVSDFQNVLNIFLEEQPELVLLDINLPSFDGYYWCRQIRGVS-TCPILFISAREGTMDQVMALENGGDDFISKPCHYEVVMAKI-
>BT9727_2620_HK_Classic|Bacillus_thuringiensis_serovar_konkukian_str._97-27|Pair_BT9727_2621|HisKA_244-303/BT9727_2621_RR_OmpR|Bacillus_thuringiensis_serovar_konkukian_str._97-27|Pair_BT9727_2620|Response_reg_3-112	-LKRFMGDVTHELKTPIALVKAYSMGIKD-GLDDGTYVDTIIKQTDQISNLIEELLRFSKLE--VLIADDEQDMLRILKAYFEKEGF-EVFLAKDGEEALQIFYDEKIDLAILDWMMPKHSGITVCQEIKKNS-SVKVLMLTAKSESEDELAALQSGADEYVKKPFHPGVLITRA-
>BT9727_2824_HK_Classic|Bacillus_thuringiensis_serovar_konkukian_str._97-27|Pair_BT9727_2825|HisKA_137-190/BT9727_2825_RR_OmpR|Bacillus_thuringiensis_serovar_konkukian_str._97-27|Pair_BT9727_2824|Response_reg_6-113	-KKELLNKLRHDINTPLTAVRLQLYYLEGY-KEQAPVLESLYEQIQYISDLTNEFNM-------ILIVEDDLIIGDLLQKILQREKY-NVYWEKEGRKVLDIIHE--IDLVVMDVMLPGEDGYQITKKIKNLGLNIPIIFLSARNDMDSKLKGLTIG-EEYMIKPFDPRELLLRI-
>BT9727_3012_HK_Classic|Bacillus_thuringiensis_serovar_konkukian_str._97-27|Pair_BT9727_3013|HisKA_238-304/BT9727_3013_RR_OmpR|Bacillus_thuringiensis_serovar_konkukian_str._97-27|Pair_BT9727_3012|Response_reg_6-111	MRQEFVSNVSHEFQSPLSSIQGFSKTLQTSMEERNHYLQIIEGESKRMSSLCKQLLTLASLDK-ILLADDDKHIRELLHYHLQKEGF-KVFEAEDGKVAQEVLEKGNIHLAIVDIMMPFVDGYTLCEEIRKYH-DIPVILLTAKDQLVDKEKGFISGTDDYIVKPFEPAEVI----
>BT9727_4271_HK_Classic|Bacillus_thuringiensis_serovar_konkukian_str._97-27|Pair_BT9727_4272|HisKA_85-152/BT9727_4272_RR_OmpR|Bacillus_thuringiensis_serovar_konkukian_str._97-27|Pair_BT9727_4271|Response_reg_5-114	SMRKMLSNISHDLKTPLTVILGYTEMLKDNEEEQQILLEKVHVKTLEVMELIHKFFDLAKLESGILLVEDDLSIQEMVEKYLVKEGF-QVTIASDGEEGVNTYLKGSFDLIILDIMMPKLDGLEVVRIIREKS-AVPILMMSAKDTDVDKAVGLGLGADDYICKPFSMIELAARV-
>BT9727_4545_HK_Classic|Bacillus_thuringiensis_serovar_konkukian_str._97-27|Pair_BT9727_4546|HisKA_398-462/BT9727_4546_RR_OmpR|Bacillus_thuringiensis_serovar_konkukian_str._97-27|Pair_BT9727_4545|Response_reg_5-114	-RKEFISGVSHELKTPLSIMKSCIFILKDA-EHKKDYFQAMEREVDKMDTLILDMLELAKFESGILIVEDEDILREILKDYFLSEQY-VVFEARDGKEALVVFEEEEVDLVILDIMLPELDGWSVCRRIRKTS-EVPIIMLTARVDEDDTLLGFELGADDYVTKPYSPPILLAR--
>BT9727_4800_HK_Classic|Bacillus_thuringiensis_serovar_konkukian_str._97-27|Pair_BT9727_4801|HisKA_277-344/BT9727_4801_RR_OmpR|Bacillus_thuringiensis_serovar_konkukian_str._97-27|Pair_BT9727_4800|Response_reg_6-115	-KNELITNVSHDLRTPLTSIMGYLRLLQDNREQYDEYIKIAFSKSEQLKNLIEDLFEYTKLT--IMVVDDEKEIRELIAIYLKNEGY-RVLQAENGEEGLELLKKNEVHLIVLDIMMPKIDGIHMCMKVREIA-EMPIIMLSAKTQDMDKILGLTTGADDYVTKPFNPLELIARIK
>BT9727_4943_HK_Classic|Bacillus_thuringiensis_serovar_konkukian_str._97-27|Pair_BT9727_4944|HisKA_247-304/BT9727_4944_RR_OmpR|Bacillus_thuringiensis_serovar_konkukian_str._97-27|Pair_BT9727_4943|Response_reg_3-112	-QKDFLDRITHELKTPLTAIIGYVDLIPKAKEDVKESLRYVAVESERLLSLVEELLKSSKY---ILVVDDESSIRNLIRMQLEMEGY-EVLTAADGREALERWNEG-PDVLILDVMLPDTDGYELLRLFREKDRDIPVLMLTAKSQMNDKLLGLQLGADDYVTKPFNYAELILRV-
>PFLU0087_HK_Classic|Pseudomonas_fluorescens_SBW25|Pair_PFLU0088|HisKA_376-443/PFLU0088_RR_NtrC|Pseudomonas_fluorescens_SBW25|Pair_PFLU0087|Response_reg_11-119	-RSEFVLRASHELRTPVTGMHMAFGLFREPDSREADLLDTVNEEMQRLMQLINDLLNFSRYQNGILLVDDESAILRTFRYCLEDEGY-TVATANSAAQADTLMQRQVFDLCFLDLRLGEDNGLDVLAQMRIQAPWMRVVIVTAHSAVDTAVDAIQAGAADYLVKPCSPDQLRLA--
>PFLU0287_HK_Classic|Pseudomonas_fluorescens_SBW25|Pair_PFLU0286|HisKA_368-434/PFLU0286_RR_NtrC|Pseudomonas_fluorescens_SBW25|Pair_PFLU0287|Response_reg_9-119	ALGTMSASISHELNQPLAAIRSYAENAEIRTTDARGNLKLISELTGRMASIIAHLRAFARRD--VVLIDDDPHLRQALCQTLDLAGL-KVLTLGEATGLTARLSRDWPGVVVSDIRMPGMDGLELLAELHGQDPDLPVLLITGHGDVPLAVQAMRAGAYDFLEKPFASDALLDSV-
>PFLU0700_HK_Classic|Pseudomonas_fluorescens_SBW25|Pair_PFLU0701|HisKA_241-307/PFLU0701_RR_OmpR|Pseudomonas_fluorescens_SBW25|Pair_PFLU0700|Response_reg_3-112	-LSQFSDDLAHELRAPLTNLMGKAQVLSRPSEEYKTSLESCTEEMERLSRMVSDMLFLAQ----ILVVEDEQKTADYLQQGLTESGY-VVDCAASGIDGLHLARQHRYELVILDVNLPNTDGWEVLEQLRRDG-NQRVMMLTARGRLADKIKGLDMGADDYLVKPFEFPELLARVR
>PFLU0829_HK_Classic|Pseudomonas_fluorescens_SBW25|Pair_PFLU0830|HisKA_203-259/PFLU0830_RR_PrrA|Pseudomonas_fluorescens_SBW25|Pair_PFLU0829|Response_reg_15-125	----QAAGAAHELGTPLATMSVLLNEMQDHDPALQEDLGVLREQVKQCKQTLQQLVR--------LLVDDDATFTRVMARAMSRRGF-RVSTAGSAEEGLTIAQADLPDYAALDLKMDGDSGLVLLPKLLELDPEMRVVILTGYSSIATAVEAIKRGACNYLCKPADADDVLAAL-
>PFLU1131_HK_Classic|Pseudomonas_fluorescens_SBW25|Pair_PFLU1132|HisKA_366-428/PFLU1132_RR_NtrC|Pseudomonas_fluorescens_SBW25|Pair_PFLU1131|Response_reg_5-110	-LGEVAMGLAHEIRNPLGIIKTATQLLHRLADTDKRHLEYVISEVSRINDLITEFLDFAKP---ILVVDDEPKLCDLLASALGQNNV-QVFIAGNGLHALKVLEQEDIDLVISDWRMPGMDGPALLAEIKVRYPHVPVIVMTAYSTVKNAVQSMRNGAYDYIAKPFDIDELD----
>PFLU1135_HK_Classic|Pseudomonas_fluorescens_SBW25|Pair_PFLU1134|HisKA_410-477/PFLU1134_RR_NtrC|Pseudomonas_fluorescens_SBW25|Pair_PFLU1135|Response_reg_14-124	--GQMSTSIAHELNQPLAALRTLSGNTVRL-DTASANLKTINELIDRMGRITASLRSFARRG--VLIVEDDPHVLLGCQQALALEDIPSVG-VGSAEEALKRIGENFAGIVISDIRLPGIDGLELLTRLKALDKSLPVVLITGHGDISMAVGAMRNGAYDFMEKPFSPERLVDV--
>PFLU1452_HK_Classic|Pseudomonas_fluorescens_SBW25|Pair_PFLU1451|HisKA_244-309/PFLU1451_RR_OmpR|Pseudomonas_fluorescens_SBW25|Pair_PFLU1452|Response_reg_3-113	-QAQFIADAAHELRTPLAALKARLELGLREPATWRSTLETAAQGTDRLTHLANQLLSLARIENGVLLVEDHLQLAESVAQALKSTGL-TVDVLHDGVAADLALSSEEYAAAILDVGLPRMDGFEVLARLRARGKNLPVLMLTARSDVKDRVHGLNLGADDYLAKPFELTELEARV-
>PFLU1575_HK_Classic|Pseudomonas_fluorescens_SBW25|Pair_PFLU1576|HisKA_230-296/PFLU1576_RR_OmpR|Pseudomonas_fluorescens_SBW25|Pair_PFLU1575|Response_reg_3-113	-LSAFSADIAHELRTPLSNLLTQTQVILTPLEDYREALHSNLEELQWMAQLVNDMLYLAKADHG-LIVEDQPKTGQYLRQGLTEAGF-TTELVADGTSGQHLALTGAYDLLILDVMLPGRDGWQILQAVRTAGLDIPVLFLTARDAVEDRVHGLELGADDYLVKPFAFSELLARVR
>PFLU1679_HK_Classic|Pseudomonas_fluorescens_SBW25|Pair_PFLU1680|HisKA_652-719/PFLU1680_RR_OmpR|Pseudomonas_fluorescens_SBW25|Pair_PFLU1679|Response_reg_10-119	-RSALLASVSHDLRTPLTSMRGSIDSLLAPLEDRRELLEGTRDEAERLDRYIQNLLDMTRLGHGILVIDDEPQIRKFLRISLASQGY-KVIEAGTGTEGLAQAALSKPDLLVLDLGLPDMDGQQVLREFREWS-TVPVLVLSVRASEGQKVEALDSGANDYVTKPFGIQEFLARV-
>PFLU1849_HK_Classic|Pseudomonas_fluorescens_SBW25|Pair_PFLU1850|HisKA_142-185/PFLU1850_RR_OmpR|Pseudomonas_fluorescens_SBW25|Pair_PFLU1849|Response_reg_13-121	-RARMLGAVSHDLRTPLSRLKLRLEQIEDLQGQMRQDLDDMIGMLD-------------------LIVDDDVPIRELLIDYLARFGI-LATGVTDGTTMRQAMQAETFDVVVLDLMLPGEDGLSLCRWLRSES-DIPILMLTARCEPTDRIIGLELGADDYMSKPFEPRELVARIQ
>PFLU2571_HK_Classic|Pseudomonas_fluorescens_SBW25|Pair_PFLU2572|HisKA_245-303/PFLU2572_RR_OmpR|Pseudomonas_fluorescens_SBW25|Pair_PFLU2571|Response_reg_4-114	-------NIAHDLRTPLTRLRAQLYRIKQAESDYAVKLDDAIAETDTLMARFRGLLRISELE--ILTIEDDAVTAREIVAELSSHGL-DVDWVDNGREGLVRAVSGDYDLITLDRMLPELDGLAIVTTLRTIGVSTPILMISALSDVDERVRGLRAGGDDYLTKPFASDEMAARV-
>PFLU2723_HK_Classic|Pseudomonas_fluorescens_SBW25|Pair_PFLU2722|HisKA_212-277/PFLU2722_RR_OmpR|Pseudomonas_fluorescens_SBW25|Pair_PFLU2723|Response_reg_20-130	-QRDLLNAVSHELRTPLTRLDFGLALLSELPEASRERLQSLVAHIRELDELVLELLSYSRLQN-ILLVEDDAALSELIASYLERNGY-QVSVLSRGDHVRERARLNPPDLVILDLMLPGLDGLQVCRLLRADSAGLPILMLTARDDSHDQVLGLEMGADDYVTKPCEPRVLLARV-
>PFLU3075_HK_Classic|Pseudomonas_fluorescens_SBW25|Pair_PFLU3074|HisKA_136-200/PFLU3074_RR_OmpR|Pseudomonas_fluorescens_SBW25|Pair_PFLU3075|Response_reg_21-128	-----NAAIAHELRTPLTILRGRLQGLAEFTPDQAQ-FYSLLNQVEGLTRLIEDLRVVGLAD--ILIAEDEPEIADILSAYLKRSGF-QTAQALDGRRALELHQSLKPDLVLLDVLMPNLDGWMVLAEIRHRG-TTPVIMLTAQDQDMDKLMGLRIGADDYIVKPFNPAEVVAR--
>PFLU3127_HK_Classic|Pseudomonas_fluorescens_SBW25|Pair_PFLU3126|HisKA_240-301/PFLU3126_RR_OmpR|Pseudomonas_fluorescens_SBW25|Pair_PFLU3127|Response_reg_3-113	--RRFIADAAHEMRTPLAVLRVHAQNLLETDTERRESLAFLITGVDRTTRLVNQLLTMARLE---LLIEDDDALGGGIHQALAREGY-TVDWLQDGNSALHALLSETFDAVVLDLGLPRMDGLEVLRRLRDSGATVPVLILTARDATEDRIAGLDAGADDYLVKPFDLAELKARL-
>PFLU3483_HK_Classic|Pseudomonas_fluorescens_SBW25|Pair_PFLU3484|HisKA_206-270/PFLU3484_RR_OmpR|Pseudomonas_fluorescens_SBW25|Pair_PFLU3483|Response_reg_9-118	-QRELTNAVSHELRTPIARLSFELDQLKQDPRQRSELIADMYADLGELEEMVSELLTYASLERGVLLVEDDEKLAGLIAHFLSQHGF-EVRVEHRGDKALAAFLEFKPKIVVLDLMLPGQSGLHVCRGIRTVS-DTPIVILTAKEDDLDHILGLESGADDYVIKPIKPPVLLARL-
>PFLU3642_HK_Classic|Pseudomonas_fluorescens_SBW25|Pair_PFLU3641|HisKA_237-293/PFLU3641_RR_OmpR|Pseudomonas_fluorescens_SBW25|Pair_PFLU3642|Response_reg_12-120	-RTRMLAAVSHDLNTPLTELRLQVELLEP-----GEARDDMLESLSELSAMVRETLNFVRDDA-VLVVDDHRKIREPLATYLRRHTF-DVRTAEDAAGMWQLLKTQAFDVVVLDVLLPDGDGFELCNQLHRRS-NTPVILLTARDNAADRVRGLDLGADDYVTKPFEPRELVARI-
>PFLU4102_HK_Classic|Pseudomonas_fluorescens_SBW25|Pair_PFLU4103|HisKA_205-261/PFLU4103_RR_OmpR|Pseudomonas_fluorescens_SBW25|Pair_PFLU4102|Response_reg_14-123	---HLLHDISHELRSPLTRMQAAIGLLRQ-DAARLEMLERIERESERMDTLIEALLTLARLQG-VLLVDDDQELTEMLRQYLECEGF-AATAVHTGEAGEAEALSGRYSIVVLDVMLPQRSGIEVLRRIRAVS-QVPVVLLTARGDNIDRITGLELGADDYVPKPSSPGELVARL-
>PFLU4121_HK_Classic|Pseudomonas_fluorescens_SBW25|Pair_PFLU4122|HisKA_239-298/PFLU4122_RR_OmpR|Pseudomonas_fluorescens_SBW25|Pair_PFLU4121|Response_reg_7-116	MRREFMADVSHELRTPLSVLRGELEAIEDVRTLDQGSMKSLQGEVSMLSKLVDDLYDLSLAD--ILIVEDEPKLAALLQDYLVAAGY-PTLCLDNGLQVVPTVRAQPPRLILLDLMLPGRDGMQVCQDLRGFS-AVPIIMITARVEEVDRLLGLDLGADDYICKPFSPREVVARV-
>PFLU4172_HK_Classic|Pseudomonas_fluorescens_SBW25|Pair_PFLU4171|HisKA_245-309/PFLU4171_RR_OmpR|Pseudomonas_fluorescens_SBW25|Pair_PFLU4172|Response_reg_3-112	-LGQVSTDMAHELRTPINNLLGETQVLQQSIESYQQLLASNVEELERLARMLDNMLFLARTD--ILVVEDEPKAGNYLLNGLQELGY-SVSLARDGVDGLHQALETPFDVIVLDVMMPKMDGWEVLRRLRKEA-DTPVLFLTARDDIADRIKGLELGADDYLIKPFSFAELVARL-
>PFLU4380_HK_Classic|Pseudomonas_fluorescens_SBW25|Pair_PFLU4381|HisKA_227-287/PFLU4381_RR_OmpR|Pseudomonas_fluorescens_SBW25|Pair_PFLU4380|Response_reg_3-113	--RRLTGDAAHELRSPLTAIKTHLQVARMEGAARDQSLAHAEEGADRLHRTLEQLLLLARVEG-VLVCEDDELIASGIVAGLTAQGF-TVERVATAGAARAMLKAATFDIMVLDLGLPDEDGLKLLQQQRSQGLEIPVLILTARDSVTNRVDGLQAGADDYLLKPFDLRELAARL-
>PFLU4442_HK_Classic|Pseudomonas_fluorescens_SBW25|Pair_PFLU4441|HisKA_186-250/PFLU4441_RR_NtrC|Pseudomonas_fluorescens_SBW25|Pair_PFLU4442|Response_reg_5-114	SLGRMVASLAHQIRTPLSAALIYASHLTDPVATHQRFAGRLKERLHELEHQVRDMLVFARGE--VLLVEDDRALREALADTLLLAGH-DYRAVGSAEDALEAVEQESFSLVVSDVNMPGMDGHQLLSLLRARQPQLPVLLMTAHGAVERAVDAMRQGAADYLVKPFEPKALIELV-
>PFLU4719_HK_Classic|Pseudomonas_fluorescens_SBW25|Pair_PFLU4720|HisKA_243-298/PFLU4720_RR_OmpR|Pseudomonas_fluorescens_SBW25|Pair_PFLU4719|Response_reg_3-111	-----LDDLAHSLKTPLAVLQGVSEDMQR--PEDRDQAWVLQSQIERMSQQISYQLQRAS-----LVVEDEALLRHHLLTRLTDSGH-VVEAVANAEEALYQTGQFNHDLAIIDLGLPGMGGLDLIRQLRTQAKTFPILILTARGNWQDKVEGLAAGADDYVVKPFQFEELEARM-
>PFLU4723_HK_Classic|Pseudomonas_fluorescens_SBW25|Pair_PFLU4724|HisKA_309-373/PFLU4724_RR_OmpR|Pseudomonas_fluorescens_SBW25|Pair_PFLU4723|Response_reg_8-117	-QRELVRAVSHELRTPVARLRFGLEMVGDTPEARRKYLEGMDSDIQDLDGLVDEMLTYARLEQGVLIVEDDERLAELTREYLESNGL-QVSVEGDGALAAARIIAEQPDLVILDLMLPGEDGLSICRTVRERY-DGVILMLTARTDDMDQVLGLDMGADDYVCKPVRPRLLLARIQ
>PFLU4953_HK_Classic|Pseudomonas_fluorescens_SBW25|Pair_PFLU4954|HisKA_363-427/PFLU4954_RR_NtrC|Pseudomonas_fluorescens_SBW25|Pair_PFLU4953|Response_reg_5-115	ALGQMSAALAHEINQPLTAQRMQLATLRLV-DDAYKALTPLDDMLTRMAALTGHLKTFAR----VIVVDDEASIRTAVEQWLSLSGF-EVQLFSRADECLARLPKDFPGVILSDVRMPGLSGLELLAEVQRRDADLPVILLTGHGDVPMAVEAMRDGAYDFLEKPFSPDALLNSL-
>PFLU4961_HK_Classic|Pseudomonas_fluorescens_SBW25|Pair_PFLU4962|HisKA_270-313/PFLU4962_RR_OmpR|Pseudomonas_fluorescens_SBW25|Pair_PFLU4961|Response_reg_8-120	-RSQLFSAISHDLRTPITRLRLRVELLEDL-DELELLVKGALQC--------------------ILLVDDDQEIRELLQTYLSRAGF-QVRGVPDGAGFRQAMNEAPCDLVILDVMLPDEDGFSLCRWIRQHPAQVPIIMLTASSDEADRVIGLELGADDYIGKPFSPRELQARIK
>PFLU4983_HK_Classic|Pseudomonas_fluorescens_SBW25|Pair_PFLU4984|HisKA_215-276/PFLU4984_RR_OmpR|Pseudomonas_fluorescens_SBW25|Pair_PFLU4983|Response_reg_3-114	---MFTSDVSHELRTPLMVLASSCELLLEIDQRGRNQVQRIARACEEMRELVQTFLMLARAEH-ILLVEDNRDILANLADYLGLKGY-TVDCAQDGLSGLHLAATEHYDLIVLDIMLPGIDGYTLCKRLREDARDTPVIMLTARDQLDDRLQGFKSGADDYLLKPFALSELAARIE
>PFLU5110_HK_Classic|Pseudomonas_fluorescens_SBW25|Pair_PFLU5111|HisKA_240-301/PFLU5111_RR_OmpR|Pseudomonas_fluorescens_SBW25|Pair_PFLU5110|Response_reg_3-113	--RRFIADAAHELRTPLAILRIHAQNAQSTEAQRREALDFLVNGVDRATRIGSQLLTMARIE---LLVEDDRALGQGIRVALGAEGY-TLDWLQDGVAALHALRTESFDLLLLDLGLPRLDGLDLLQQLRAEQHDVPVLILTARDGTAERIAGLDAGADDYLVKPFDVEELKARVR
>PFLU5236_HK_Classic|Pseudomonas_fluorescens_SBW25|Pair_PFLU5237|HisKA_756-817/PFLU5237_RR_unclassified|Pseudomonas_fluorescens_SBW25|Pair_PFLU5236|Response_reg_4-109	-IGRLAAGVAHEIGNPITGIACLAQNLREEREEDGEISGQILEQTKRVSRIVQSLMSFAHA---ILIVEDETIIRSALRRLLERNQY-QVSEAGSVQEAQERFSIPTFDLIVSDLRLPGAPGTELIKL----GQGTPVLIMTSYASLRSAVDSMKMGAVDYIAKPFDHDEMLQAV-
>PFLU5640_HK_Classic|Pseudomonas_fluorescens_SBW25|Pair_PFLU5641|HisKA_260-319/PFLU5641_RR_OmpR|Pseudomonas_fluorescens_SBW25|Pair_PFLU5640|Response_reg_4-113	-----VHTLTHELKSPLAAIRGAAELLQGTREQQQRFVGNIDSESARLQQLIERLLNLAQVEQ-ILIVEDEAAIADTLIFALQGEGF-TTTWLSLGQEALAYQRQTPADLVILDIGLPDITGFETCKQLRRFS-EVPVMFLSARDGEIDRVVGLEIGADDYVVKPFSPREVTARV-
>PFLU6040_HK_Classic|Pseudomonas_fluorescens_SBW25|Pair_PFLU6039|HisKA_205-271/PFLU6039_RR_OmpR|Pseudomonas_fluorescens_SBW25|Pair_PFLU6040|Response_reg_6-118	MRKDFVANVSHELRTPLTVICGYLETLLDINPRWSRALQQMQQQGSRMQTLLNDLLLLAKLEA-ILIVDDEAPIREMIAVALEMAGY-DCLEAENSQQAHAIIVDRKPDLILLDWMLPGTSGIELARRLKRDEGDIPIIMLTAKGEEDNKIQGLEVGADDYITKPFSPRELVARL-
>CD241_0240_HK_Classic|Corynebacterium_diphtheriae_241|Pair_CD241_0239|HisKA_41-98/CD241_0239_RR_OmpR|Corynebacterium_diphtheriae_241|Pair_CD241_0240|Response_reg_6-118	--------LAHEIRTPLSLIKGAAELLSQDPHKCERLVATIGANSTRAIEVAESFLLQAKLNSGVLVVDDEPQMVQIISYALELEGW-EVLSASSAQKGWQLLGEYRCDLVILDVMLPDASGYALCERIRAAGAATPVIMLTALGDTDNRVEGLEAGADDYVAKPFSPKELVLR--
>CD241_0328_HK_Classic|Corynebacterium_diphtheriae_241|Pair_CD241_0329|HisKA_149-213/CD241_0329_RR_OmpR|Corynebacterium_diphtheriae_241|Pair_CD241_0328|Response_reg_4-113	ARRDFVANVSHELKTPVGGMALLAEAITEDQEQVKYFGNRLYKEAHRLADMINELISLSKLQG-ILLVEDEESLADPLAFLLRKEGF-DVVIAGDGPSALVEFDRNAIDIVLLDLMLPGMSGTDVCKRLRAVS-SVPVIMVTARDSEIDKVVGLELGADDYVTKPYSSRELIARIR
>CD241_0633_HK_Classic|Corynebacterium_diphtheriae_241|Pair_CD241_0632|HisKA_257-323/CD241_0632_RR_OmpR|Corynebacterium_diphtheriae_241|Pair_CD241_0633|Response_reg_5-114	-QKQFTSDVSHELRTPLTTVRMAADLIVDLSPGTRRASELMVRELDRFEALLADLLEISRHDAGILVVDDDPAISEMLTIVLEAEGF-EPVAVTDGAVAVDAFRAESPDLVLLDLMLPGMNGIDICRIIRQES-AVPIVMLTAKTDTVDVVLGLESGADDYINKPFKPKELIARL-
>CD241_0767_HK_Classic|Corynebacterium_diphtheriae_241|Pair_CD241_0766|HisKA_249-320/CD241_0766_RR_OmpR|Corynebacterium_diphtheriae_241|Pair_CD241_0767|Response_reg_3-113	-QTELVADAGHELKTPLTSMRTNIELLMMSEEDKQALQSDVIAQMEELSTLIGDLIDLARQET-IVVVDDEQAVRESLCRSLSFNGY-EVHLAQDGVEALEVIEREQPELVILDVMMPRMDGLEVCRTLRGSGDDRPILVLTARDGVSDRVAGLDAGADDYLPKPFALEELLARVR
>CD241_1848_HK_Classic|Corynebacterium_diphtheriae_241|Pair_CD241_1849|HisKA_293-355/CD241_1849_RR_OmpR|Corynebacterium_diphtheriae_241|Pair_CD241_1848|Response_reg_11-121	-MRRFVGDASHELRTPLTSVKGYAELYRSATTDADLVIEKIEDEAKRMSLLVEDLLALTRAEG-VLVVDDEPNIVELLKVSLKFQGF-EVETAQSGLEALEKARSFQPDAFILDVMMPGMDGYELLPKLRADGFEGPVLYLTAKDAVEHRIHGLTIGADDYVTKPFSLEEVITRL-
>KUI_1322_HK_Classic|Taylorella_equigenitalis_ATCC_35865|Pair_KUI_1321|HisKA_312-362/KUI_1321_RR_OmpR|Taylorella_equigenitalis_ATCC_35865|Pair_KUI_1322|Response_reg_8-118	---TMLAGLPHDLKGPLARMRLRLEMSED-----DPIKKGMLNDVQEMQSIIEQFI--------VMIVDDDPDLRQLLAQYLNRHGY-DTLLVSDGNDLADRIIRFSPDLIVLDRMLPSGDGVDFCRNLRDQHEDIPIILLTARDETADRVLGLESGADDYIGKPFDPRELLARIE
>KUI_1448_HK_Classic|Taylorella_equigenitalis_ATCC_35865|Pair_KUI_1447|HisKA_354-416/KUI_1447_RR_NarL|Taylorella_equigenitalis_ATCC_35865|Pair_KUI_1448|Response_reg_1-90	MLGEMVSGIGHELNQPLSAILYFAEGLKLK-----NALDSIVCEVKSSKKIIDNVRLW---------------------------GY-QYKTWSDSLEFLRLTDLHSTAVVITDLRMPNIDGEHLVQHLNNSKSTLGVIVLTGHGDVDTAVKLLKNGIVDFLQKPVEAKNLAESI-
>MIP_00605_HK_Classic|Mycobacterium_indicus_pranii_MTCC_9506|Pair_MIP_00603|HisKA_279-343/MIP_00603_RR_OmpR|Mycobacterium_indicus_pranii_MTCC_9506|Pair_MIP_00605|Response_reg_11-121	--RQFVADASHELRTPLAAIRGYTELTQRDREAVAQAMSRVASETERMTRLVEDLLLLARLDSGVLVVDDEPVLAEMVSMALRYEGW-NISTAGDGESAIAAARNQRPDVVVLDVMLPDMSGLDVLHKLRGEIPQLPVLLLTAKDAVEDRIAGLTAGGDDYVTKPFSIEEVVLRL-
>MIP_01074_HK_Classic|Mycobacterium_indicus_pranii_MTCC_9506|Pair_MIP_01073|HisKA_229-291/MIP_01073_RR_OmpR|Mycobacterium_indicus_pranii_MTCC_9506|Pair_MIP_01074|Response_reg_15-125	-MRRFITDASHELRTPLTTIRGFAELYRQAARDVAMLLSRIESEASRMGLLVDDLLLLARLD--VLVVDDEANIVELLSVSLKFQGF-EVYTATNGAQALDRAREARPDAVILDVMMPGMDGFGVLRRLRADGIDAPALFLTARDSLQDKIAGLTLGGDDYVTKPFSLEEVVARL-
>MIP_01493_HK_Classic|Mycobacterium_indicus_pranii_MTCC_9506|Pair_MIP_01496|HisKA_231-293/MIP_01496_RR_OmpR|Mycobacterium_indicus_pranii_MTCC_9506|Pair_MIP_01493|Response_reg_1-110	--RDFAAVSSHELRTPLTAMRTNLEVLSTPDEQRKEVLGDVIRTQSRIEATLTALERLAQG----LVVDDDSDVLASLERGLRLSGF-EVSTAVDGAEALRSATETRPDAIVLDINMPVLDGVSVVTALRAMDNDVPVCVLSARSSVDDRVAGLEAGADDYLVKPFVLAELVARVK
>MIP_01596_HK_Classic|Mycobacterium_indicus_pranii_MTCC_9506|Pair_MIP_01594|HisKA_232-304/MIP_01594_RR_OmpR|Mycobacterium_indicus_pranii_MTCC_9506|Pair_MIP_01596|Response_reg_3-111	-QARLVTDAGHELRTPLTSLRTNVELLMAPEQEMVDLRADVVAQIEELSTLVGDLVDLTRDDAGILVVDDDRAVRESLRRSLSFNGY-SVELAHDGVEALELIASDRPDALVLDVMMPRLDGLEVCRQLRSTGDDLPILVLTARDSVSERVAGLDAGADDYLPKPFALEELLARM-
>MIP_01732_HK_Classic|Mycobacterium_indicus_pranii_MTCC_9506|Pair_MIP_01730|HisKA_629-696/MIP_01730_RR_OmpR|Mycobacterium_indicus_pranii_MTCC_9506|Pair_MIP_01732|Response_reg_4-113	-RRSLLSAVSHDLRTPLAAAKVAVSSLRASATDTAELLATIEESIDQLTALVGNLLDSSRLAAGVLVIDDEPQILRALRINLSVRGY-EVVTASSGAGALRAAAEHKPDVVILDLGLPDISGIDVLAGLRGWL-TAPVIVLSARTDSSDKVEALDAGADDYVTKPFGMDEFLARL-
>MIP_01739_HK_Classic|Mycobacterium_indicus_pranii_MTCC_9506|Pair_MIP_01740|HisKA_277-344/MIP_01740_RR_OmpR|Mycobacterium_indicus_pranii_MTCC_9506|Pair_MIP_01739|Response_reg_34-144	-MRQFISDASHELRTPLAAIQGYAELTRQLPPTTEYALARIESEARRMALLVDELLLLSRLGEGVLLVDDEPALTNLVKMALHYEGW-VVDIAHNGREAMAKFERVNPDVLVLDIMLPDVDGLRILERVRQSDVYTPTLFLTARDSVMDRVTGLTAGADDYMTKPFSLEELVARL-
>MIP_04225_HK_Classic|Mycobacterium_indicus_pranii_MTCC_9506|Pair_MIP_04224|HisKA_236-298/MIP_04224_RR_OmpR|Mycobacterium_indicus_pranii_MTCC_9506|Pair_MIP_04225|Response_reg_14-123	-RRAFTADVAHELRTPLAILRSELEAVQDIRQPTDGVIRSLHNETLRLTHLVADLEALASADA-VLVVDDEKKLRTLVREYLEREGY-AVLEAADGQTALDLARTAGPDLVLLDLGLPRLPGDEVARLLRKDS-DLPIVMLTAKASENDRVAGLRLGADDYVVKPFSPRELVARVE
>MIP_04646_HK_Classic|Mycobacterium_indicus_pranii_MTCC_9506|Pair_MIP_04647|HisKA_270-336/MIP_04647_RR_OmpR|Mycobacterium_indicus_pranii_MTCC_9506|Pair_MIP_04646|Response_reg_25-133	--RRFLVDAAHELRTPIAGIQVAAEQLANHDGSQYRRAALLFSDARRAGRLVSDMLDLSRIDAGVLVVEDSETIREMVSEALADVGY-HTDARCDGDGLEEVLDGMRPDLVVLDVMLPGRDGFALIDVIREWG-DIGIVLITARDGLPDRLRGLDGGADDYVIKPFELAELVSRV-
>MIP_06127_HK_Classic|Mycobacterium_indicus_pranii_MTCC_9506|Pair_MIP_06130|HisKA_274-340/MIP_06130_RR_OmpR|Mycobacterium_indicus_pranii_MTCC_9506|Pair_MIP_06127|Response_reg_8-117	-QRRFTSDVSHELRTPLTTVRMAADLIYDLDPTLARSTELMVSELDRFESLLNDLLEISRHDAGILVVDDDASLAEMLTIVLRGEGF-DTAVIGDGTQALTAVRELRPDLVLLDLMLPGMNGIDVCRVLRADS-GVPIVMLTAKTDTVDVVLGLESGADDYIMKPFKPKELVARVR
>MIP_06901_HK_Classic|Mycobacterium_indicus_pranii_MTCC_9506|Pair_MIP_06899|HisKA_155-218/MIP_06899_RR_OmpR|Mycobacterium_indicus_pranii_MTCC_9506|Pair_MIP_06901|Response_reg_4-113	-RRDFVANVSHELKTPVGAMALLAEALLADSETVRRFAEKVLVEANRLGDMVAELIELSRLQG-VLIVEDEESLADPLAFLLRKEGF-EATVVTDGSAALAEFDRAGADIVLLDLMLPGMSGTDVCKQLRARS-SVPVIMVTARDSEIDKVVGLELGADDYVTKPYSARELIARIR
>Btoyo_0011_HK_Classic|Bacillus_toyonensis_BCT-7112|Pair_Btoyo_0010|HisKA_258-323/Btoyo_0010_RR_OmpR|Bacillus_toyonensis_BCT-7112|Pair_Btoyo_0011|Response_reg_6-115	-RREFFAIVAHELKSPLTVMKGYLEGMIYY-QNRDQYLKKNHQIIESMEQLVREILSVSKLEQ-ILVVEDDQEIQELIKQFLMTQHY-TVVVASDGLEGMTQFNNQSFDLILLDVMMPNLNGFEVSKMIRSQS-NVPIIMLTALEEEEDQMKGFDLGIDDYITKPFSFHVLIRRV-
>Btoyo_0148_HK_Classic|Bacillus_toyonensis_BCT-7112|Pair_Btoyo_0149|HisKA_244-303/Btoyo_0149_RR_OmpR|Bacillus_toyonensis_BCT-7112|Pair_Btoyo_0148|Response_reg_3-112	-LKQFMGDMTHELKTPIALVKAYSMGIKD-GLDDGTYVDTIIKQTDQISNLIEELLRFSKLE--VLIADDEQDMLKILKAYFEKEGF-EVLLAKDGEEALQIFYDEKIDLAILDWMMPKHSGITVCQEIKKNS-SVRVLMLTAKSESEDELAALQSGADEYVKKPFHPGVLITRA-
>Btoyo_0339_HK_Classic|Bacillus_toyonensis_BCT-7112|Pair_Btoyo_0340|HisKA_83-136/Btoyo_0340_RR_OmpR|Bacillus_toyonensis_BCT-7112|Pair_Btoyo_0339|Response_reg_6-113	-KKELLNKLRHDINTPLTAVRLQLYYLEGY-KAQAPVLESLYEQIQYISDLTNEFNIQ------ILIVEDDLIIGDLLQKILQREKY-NVCWEKEGRKVLDIIHE--IDLVVMDVMLPGEDGYQITKKIKNLGLNIPIIFLSARNDMDSKLKGLTIG-EEYMIKPFDPRELLLRI-
>Btoyo_1775_HK_Classic|Bacillus_toyonensis_BCT-7112|Pair_Btoyo_1776|HisKA_85-152/Btoyo_1776_RR_OmpR|Bacillus_toyonensis_BCT-7112|Pair_Btoyo_1775|Response_reg_5-114	SMRKMLSNISHDLKTPLTVILGYTEMLKDNEEEQKILLEKVHIKTLEVMELIHKFFDLAKLESGILLVEDDISIQEMVEKYLIKEGF-QVTIASDGEEGVNTYLKGSFDLIILDIMMPKLDGLEVVRIIREKS-AVPILMMSAKDTDVDKAVGLGLGADDYICKPFSMIELAARV-
>Btoyo_1907_HK_Classic|Bacillus_toyonensis_BCT-7112|Pair_Btoyo_1906|HisKA_255-319/Btoyo_1906_RR_OmpR|Bacillus_toyonensis_BCT-7112|Pair_Btoyo_1907|Response_reg_4-113	-RKELISNISHDLKTPITSIIGYVEGIKDTPEKMDKYLTTIHTKAKHMDTLIDELFLFSKLD--ILLIEDEVSIAELQRDYLEISDF-QVDVEHSGEIGLQMALQEDYDLIILDIMLPKMNGFEICKQIRAIK-DIPILLVSAKKEDIDKIRGLGLGADDYITKPFSPSELVARVK
>Btoyo_2051_HK_Classic|Bacillus_toyonensis_BCT-7112|Pair_Btoyo_2052|HisKA_405-469/Btoyo_2052_RR_OmpR|Bacillus_toyonensis_BCT-7112|Pair_Btoyo_2051|Response_reg_5-114	-RKEFISGVSHELKTPLSIMKSCISILKDVAEHKKEYFQAMEREVDKMDTLILDMLELAKFESGILIVEDEEILREILKDYFLSEQY-VVFEARDGKEALVVFEEEEVDLVILDIMLPELDGWSVCRRIRKTS-EVPIIMLTARVDEDDTLLGFELGADDYVTKPYSPPILLAR--
>Btoyo_2267_HK_Classic|Bacillus_toyonensis_BCT-7112|Pair_Btoyo_2266|HisKA_211-277/Btoyo_2266_RR_OmpR|Bacillus_toyonensis_BCT-7112|Pair_Btoyo_2267|Response_reg_4-113	SRKEFMSMISHELKTPIAAVMGQLDGMIHY-KDRDKYLKRSYEMMQDINILTEKVSELSKIQN-ILVIEDNPDIQELIREFLMAQNF-TVDVVGAGTEGILLFQKNSYDLVLLDVMLPDIDGYSICKIMRGQS-DVPIIMLTGLHNEESEIKGFELGIDDYITKPFHYTVFIKRV-
>Btoyo_2460_HK_Classic|Bacillus_toyonensis_BCT-7112|Pair_Btoyo_2461|HisKA_247-304/Btoyo_2461_RR_OmpR|Bacillus_toyonensis_BCT-7112|Pair_Btoyo_2460|Response_reg_3-112	-QKDFLDRITHELKTPLTAIIGYVDLIPKSKEDVQESLRYVAVESERLLSLVEELLKSSKY---ILVVDDESSIRNLIRMQLEMEGY-EVLVAADGREALEKWKEG-PDVLILDVMLPDTDGYELLRLFREKDRDIPVLMLTAKSQMNDKLLGLQLGADDYVTKPFNYAELILRV-
>Btoyo_2974_HK_Classic|Bacillus_toyonensis_BCT-7112|Pair_Btoyo_2973|HisKA_231-298/Btoyo_2973_RR_OmpR|Bacillus_toyonensis_BCT-7112|Pair_Btoyo_2974|Response_reg_6-115	-KNELITNVSHDLRTPLTSIMGYLRLLRDNKEQHDEYTRIAFAKSEQLKNLIEDLFEYTKLT--ILVVDDEKEIRKLITIYLKNEGY-KVLQAGDGEEGLRMLEENEVHLVVLDIMMPKVDGIHMCMKVREAK-EMPIIMLSAKTQDMDKILGLTTGADDYVTKPFNPLELIARIK
>Btoyo_3262_HK_Classic|Bacillus_toyonensis_BCT-7112|Pair_Btoyo_3263|HisKA_259-324/Btoyo_3263_RR_OmpR|Bacillus_toyonensis_BCT-7112|Pair_Btoyo_3262|Response_reg_4-113	-RNEFLASVAHELLTPLTYMKGYAKVAKRTKEEREEYLQIIEDETDSVTDLVQDLFMLVQLEQ-ILLVDDEERMLRLLDLFLSPRGY-FCMKAKSGLEALELIQQKKFDIILLDVMMPNMDGWDTCYQIRQIS-NVPIIMLTARNQNYDMVKGLTMGADDYITKPFDEHVLVARIE
>Btoyo_3329_HK_Classic|Bacillus_toyonensis_BCT-7112|Pair_Btoyo_3330|HisKA_234-299/Btoyo_3330_RR_OmpR|Bacillus_toyonensis_BCT-7112|Pair_Btoyo_3329|Response_reg_4-113	-RSEFLASVAHELRTPLTYVRGYADILKEPSEQRLRYLSIIKDESDYITNLVQDLFSLAQMEQ-ILLVDDEPRMLELLTLYLTPIGY-NCVCATSGEEAILHIENRNFKFVLLDIMMPKMDGWETCKKIRSFS-NIPIIMVTARDQTVDVVQGLKIGADDYVTKPFHEEELFARIE
>Btoyo_3655_HK_Classic|Bacillus_toyonensis_BCT-7112|Pair_Btoyo_3654|HisKA_230-296/Btoyo_3654_RR_OmpR|Bacillus_toyonensis_BCT-7112|Pair_Btoyo_3655|Response_reg_3-113	-EKQFTSDASHELRTPTSVIISQCEYAQRNPKEMEESLEVILRQSRKMSSLISQLLLLARVDQGVLIVEDEQDLQNILVKRLNAEYY-SVDGCGNGADALDYISMATYDLIVLDIMIPRIDGLQVLQRLRADNNTTPVLLLTAKDTIDDRVKGLDLGADDYLVKPFAFDELLARIR
>Btoyo_3759_HK_Classic|Bacillus_toyonensis_BCT-7112|Pair_Btoyo_3760|HisKA_356-414/Btoyo_3760_RR_OmpR|Bacillus_toyonensis_BCT-7112|Pair_Btoyo_3759|Response_reg_6-114	-REEWITGLTHDLKTPLSSIYGYALLLESTDRDIQQFGSVMKEKSQYMTTLIDDLL--------ILLVDDETAILQLLTTILEKEGFSHITTATSAELALSLIEQNNYDLIILDVMLPGQSGFDICPIIRQQT-DCPIFFLSAKASDLDKISGFSYGADDYITKPFNPLEVVARM-
>Btoyo_4531_HK_Classic|Bacillus_toyonensis_BCT-7112|Pair_Btoyo_4530|HisKA_133-199/Btoyo_4530_RR_OmpR|Bacillus_toyonensis_BCT-7112|Pair_Btoyo_4531|Response_reg_5-114	MRQEFVSNVSHEIQSPLTSIKGFARALQDSEEKRKHYLTIIETETTRLSKLSQNLLKLTLLES-ILIVDDDPHIRELVSVFLEREGF-QTYEAIDGIDALRKMDEVKVDMVILDIMMPNMDGFDVCFELRKYY-DIPVLMLTAKGETSQKVKGFHLGTDDYLVKPFDPIELVVRV-
>Syn6312_0108_HK_Classic|Synechococcus_sp._PCC_6312|Pair_Syn6312_0109|HisKA_197-261/Syn6312_0109_RR_OmpR|Synechococcus_sp._PCC_6312|Pair_Syn6312_0108|Response_reg_5-115	--GEFATMIVHELRNPLTTIKMGLNYFFKLPAAAQERLTLALEEAHRLEMLLSEILLYAKPQ--ILLIEDEPKIARFIQLELESEGY-EITVSHDGQAGLILAREHPLDLMIVDWMLPGLTGVEICRRLRATGNVMPVIMLTGRDDIPDRIAGLDAGADDYVIKPFSIEELLARIR
>Syn6312_0134_HK_Classic|Synechococcus_sp._PCC_6312|Pair_Syn6312_0133|HisKA_541-608/Syn6312_0133_RR_PleD_VieA|Synechococcus_sp._PCC_6312|Pair_Syn6312_0134|Response_reg_8-119	-KTSFISMVSHEFRTPLTSIFSSTELLGSNPERQKKHFERIYSSIYRLEQMLDDVLLIGRVESGILVIEDDENIRENIVEMLTDAGF-QVLVAENGVSGLRIAQENHPNLILCDIMMPQLDGYGVLLALRQKPELIPFIFLTARADRTDQRIGMQLGADDYVTKPFSRADLLEAI-
>Syn6312_2726_HK_Classic|Synechococcus_sp._PCC_6312|Pair_Syn6312_2725|HisKA_123-190/Syn6312_2725_RR_NarL|Synechococcus_sp._PCC_6312|Pair_Syn6312_2726|Response_reg_8-120	-REDFILTLTHDLKTPLLGAIETLKAMEIITNAQKNAIQIMIRSHQKTLKLVETMLDVYEIDN-ILLVEDDELFRLGLSTRLQEVNFQVMAQAEDGETALDFLRTNVVDVVILDVGLPGLGGLETCYQIKQNYPKLPVLILTSHSSSNLITDLIKKQAQGYCLKGGASEHLVLAI-
>Syn6312_2835_HK_Classic|Synechococcus_sp._PCC_6312|Pair_Syn6312_2836|HisKA_190-257/Syn6312_2836_RR_OmpR|Synechococcus_sp._PCC_6312|Pair_Syn6312_2835|Response_reg_3-113	-LKQFTADASHELRSPLMAIETNVEVALTRSKGDTEKFEAIASATSQMTRLTEDLLFLARTDQ-ILLVEDDDRIAKPLAEALRHQNH-GIDIAKDGVEGWDCATAVRYDLILLDIMLPRLDGITMCKQLRSAGSQALILMLTARDTTTDKVVGLDAGADDYLVKPFKLEELAARIR
>Syn6312_3246_HK_Classic|Synechococcus_sp._PCC_6312|Pair_Syn6312_3245|HisKA_184-245/Syn6312_3245_RR_OmpR|Synechococcus_sp._PCC_6312|Pair_Syn6312_3246|Response_reg_26-149	-RDRWASDVAHELKTPLTSLRLVAETLQQVDPSLRSWVDRLLAETVRLSLLVQELLELNRL---IFLVEDEDLIRDTIALALQDEGY-AVVTASDGRQALDRINSQLFDLIILDLMLPFVNGLDICRFLRREGCSVPILMLSAKGSEIDRVVGLEVGADDYLTKPFGMRELIAR--
>Deide_01480_HK_Classic|Deinococcus_deserti_VCD115|Pair_Deide_01470|HisKA_296-362/Deide_01470_RR_OmpR|Deinococcus_deserti_VCD115|Pair_Deide_01480|Response_reg_16-125	SQRRFTSDASHELRTPVTAISGHASYLLRPTGQQAESLKIIQSESERLTNLIASLLQLARSDSGVLVIEDEKDIARFIELELAAEGY-ATEVAFDGVTGLSKFREVNPDLVILDLMLPVLDGLEVARRIRKTS-NTPIIILTAKDGIQDKVEGLDSGADDYLIKPFSIEELLARVR
>Deide_01870_HK_Classic|Deinococcus_deserti_VCD115|Pair_Deide_01860|HisKA_295-363/Deide_01860_RR_CheY|Deinococcus_deserti_VCD115|Pair_Deide_01870|Response_reg_6-127	-LEQFAYVASHDLQEPLRTIGSYTELLARLDARADQYITFTIDATSRMKTLIQDLLAFSRVRQGILLVEDNPADILLTEEAFEEADFHRLHVAKDGVEALAFLRHEGPDVILMDLNMPRMGGLEVLDILKEDERSIPVIVLTTSRAETDIWRSYNLHANAYIPKPVSVSEFVEVI-
>Deide_14510_HK_Classic|Deinococcus_deserti_VCD115|Pair_Deide_14520|HisKA_123-189/Deide_14520_RR_NarL|Deinococcus_deserti_VCD115|Pair_Deide_14510|Response_reg_5-109	-RNAFMATLVHDLKTPLIATSHLTHALATPEEERREVGQHIQAETGRLLALVQQMADAHRF----VIADDHPLFRMGLKYALIQQGFDVVAEAADGVSALEACRRLVPDAALLDVKMPGMTGIEVCEKLRLTHPEVVGVLITTFSEPAIVQAARSAGARGYVSKETDPESLARQV-
>Deide_19810_HK_Classic|Deinococcus_deserti_VCD115|Pair_Deide_19800|HisKA_112-168/Deide_19800_RR_OmpR|Deinococcus_deserti_VCD115|Pair_Deide_19810|Response_reg_4-114	-LREATAVLSHEFRTPVAALRGVLEALEYPTDLAQNFVKQGLQETERLARLVEDL---------VVVIEDEGTVRDVLRFHLERAGL-RVTALDSTHGALEQLGGA--DALVLDWMLPGESGLGFLRRLRADARRMPVLMLTARAAEAERVEGLESGADDYLTKPFSAAELVARVR
>Deide_22150_HK_Classic|Deinococcus_deserti_VCD115|Pair_Deide_22160|HisKA_251-309/Deide_22160_RR_OmpR|Deinococcus_deserti_VCD115|Pair_Deide_22150|Response_reg_3-113	--QAFLRAAAHDLRSPLAALSARVEGLARDAGRYRSDLKEIGTDLNRLATLTNHLLLLARD----LLVEDDPRIAQPTTGVLREAGY-AVTWAQTGPEGLEAAMLGEYPLIVLDVMLPGLDGFEVARELRAGGVDSAILFLTARGELADRIEGLDLGGDAYLVKPFAMPELLATL-
>Fisuc_0434_HK_Classic|Fibrobacter_succinogenes_subsp._succinogenes_S85|Pair_Fisuc_0435|HisKA_458-525/Fisuc_0435_RR_OmpR|Fibrobacter_succinogenes_subsp._succinogenes_S85|Pair_Fisuc_0434|Response_reg_6-116	MKANFLSSVSHELKTPLTSIKMFAEMMARKVEKVQEYSGLIGKEATRLENLIGAILNYTRMEHGILIVEDEEIIRLGLQDNFELENY-EVETACDGEEAIAKTDSFQPHLILLDVMLPKKSGFEVCRIIRKKHPECIIIMLTAKTEETSKVAGLDMGADDYVTKPFSILELLARV-
>Fisuc_1321_HK_Classic|Fibrobacter_succinogenes_subsp._succinogenes_S85|Pair_Fisuc_1320|HisKA_410-475/Fisuc_1320_RR_OmpR|Fibrobacter_succinogenes_subsp._succinogenes_S85|Pair_Fisuc_1321|Response_reg_10-120	-RQDFVSAITHELKTPLTAIKMYAELLQNSEEKKQKYYGQIASEADRLSRLIQNVLNLSKLDG-ILIIEDEIAIAEGLVDLCELNGY-RVKHVVDGESGLAEALSGQYGLVLLDLMLPGMDGFTVCDKIREKDKSLPIIILSAKNSDDDIINGLKFGADDYIPKPFSVPMLLARI-
>Fisuc_1699_HK_Classic|Fibrobacter_succinogenes_subsp._succinogenes_S85|Pair_Fisuc_1698|HisKA_236-302/Fisuc_1698_RR_OmpR|Fibrobacter_succinogenes_subsp._succinogenes_S85|Pair_Fisuc_1699|Response_reg_2-114	MRDEFTANASHELKTPLTSISGYAELIENKPEDVKRFAGKIHKEAGRLLSIANDIMTLSKLDA-IYIVEDDAEVREMETYALKSGSF-DVMAFECGKVMDEQVKVKVPDLFILDIMLPGEDGLSILKRLRGQEKNIPVIMLTAKGTELDKVKGLDLGADDYIAKPFGILELISRV-
>PT7_0186_HK_Classic|Pusillimonas_sp._T7-7|Pair_PT7_0187|HisKA_370-436/PT7_0187_RR_NarL|Pusillimonas_sp._T7-7|Pair_PT7_0186|Response_reg_13-126	---NFGAMVSHQFRTPLAIVDSSLQRLIRL-AEVRERSGRAREAIKRMTKLIECTLDAGRLDAGILCVEDEADLLRDTAEELSEAGY-TPLLASNGDEALDQLRTTRPDLILCDISMPDMDGFSLLCAVQGMAAGIPFVFLTALSDPREVVEGKRLGADDYLVKPVDYDLLLATI-
>PT7_0617_HK_Classic|Pusillimonas_sp._T7-7|Pair_PT7_0616|HisKA_135-199/PT7_0616_RR_OmpR|Pusillimonas_sp._T7-7|Pair_PT7_0617|Response_reg_3-113	-QKRFIGHAAHQLRTPLTGLKLESELMTRLPDDVRERAERIKSVSDRMIRLGQQLLVLAKADS-VLVIEDDTTLGHALQEFLVEQGY-AVDWLADGDQVLGAVAGQSYDLLLLDLNLPGHSGLDILAKLRAEGEQVPVLILTARDGVEDRVAGLDAGADDYVTKPFDLTELAARV-
>PT7_1014_HK_Classic|Pusillimonas_sp._T7-7|Pair_PT7_1013|HisKA_360-429/PT7_1013_RR_NarL|Pusillimonas_sp._T7-7|Pair_PT7_1014|Response_reg_10-119	-MGEMASSLAHELNQPLTAISNYSMAAVADHGRLVEALEKAASQAERAGKIISRIREFVKR---IYIVDDDEAVRDSLRWLLEANGY-RVRSYSGAEEFLHAYEPDQVGVLIADVRMPGMSGLELQEELLQRDAPLPIVFITGHGDVPMAVSTMKKGAVDFLEKPFNETDLRNIV-
>PT7_1096_HK_Classic|Pusillimonas_sp._T7-7|Pair_PT7_1097|HisKA_246-312/PT7_1097_RR_OmpR|Pusillimonas_sp._T7-7|Pair_PT7_1096|Response_reg_3-113	-LSDFSGDIAHELRTPVTNLKTQTEVALSSVEQYREILYSNLEEYERMAKMLSDMLFLAQADN--LVVEDEIKTGDYVRQGLIESGF-VVDLTRTGLDGHHLALTGSYDLIILDVMLPDVDGWRIVQALRDAKSSTPVLFLTARDSVEDRVKGLELGADDYLVKPFAFSELLARVR
>PT7_1193_HK_Classic|Pusillimonas_sp._T7-7|Pair_PT7_1192|HisKA_124-181/PT7_1192_RR_NtrC|Pusillimonas_sp._T7-7|Pair_PT7_1193|Response_reg_6-108	-QRESLRNLAHEVKNPLGGIRGAAQLLEAGNDALDEYTQVIIAEADRLASLVDRLI--------VWIVDDDQSIRWVLEKALARVAI-PARSFDSAAQVLAALETETPSVLVTDVRMPGEDGLSLLHRIKQVRPDLPVIVMTAFTDLNSTVQAFQKGAFDYLPKPFDVNA------
>PT7_1229_HK_Classic|Pusillimonas_sp._T7-7|Pair_PT7_1230|HisKA_255-305/PT7_1230_RR_NtrC|Pusillimonas_sp._T7-7|Pair_PT7_1229|Response_reg_8-118	-LGRISATLAHELRNPLTGMMTALQTIRMNPRSRGEALDFIDRGIQSLQGV-------------VLLVEDDGVLGGAVAQRLRLEGM-SVHWAQTVSDALENLERYEPALMMCDIRLPDGTGTDLYKRAGRLIWETDVIFATAYADIQQAIDLVKTGATDYLIKPYDINELVRRI-
>PT7_1354_HK_Classic|Pusillimonas_sp._T7-7|Pair_PT7_1353|HisKA_268-331/PT7_1353_RR_OmpR|Pusillimonas_sp._T7-7|Pair_PT7_1354|Response_reg_3-113	-QRRFVANAAHQLKTPLAGMRTQAELALRSPDKLNASLEQMVLGSERATRLVNQLLTLAKAES-ILIAEDDSILADGLSRSLRYEGY-AVDVVNDGSSADSALKLQSFDLLILDLDLPQLHGLAVLRLLRQRQTPLPVLILTAADSVEQRVKGLDLGADDYMAKPFALTELEARV-
>PT7_1744_HK_Classic|Pusillimonas_sp._T7-7|Pair_PT7_1743|HisKA_252-306/PT7_1743_RR_OmpR|Pusillimonas_sp._T7-7|Pair_PT7_1744|Response_reg_12-122	---IMLAGISHDLRTPLARMRLEIELS----DVSDETRQSIDEDLGQIDHSIGQLMEYARP---ILVVDDDPRLRDLLRRYLTEQGF-NVFVAEDAKEMGKLWQREHFDLLVLDLMLPGEDGLSICRRLRGGHDNTPIIILTAKAEEIDRIVGLEMGADDYLSKPFNPRELLARVN
>PT7_1816_HK_Classic|Pusillimonas_sp._T7-7|Pair_PT7_1815|HisKA_246-312/PT7_1815_RR_OmpR|Pusillimonas_sp._T7-7|Pair_PT7_1816|Response_reg_3-113	-LSDFSGDIAHELRTPITNLKTQTEVALSSVEQYREILYSNLEEYERMAKMVGDMLFLAQADN--LLVEDETKTGDYVRQGLVESGF-VVDLVRTGLDGHHLALTGSYDLIILDVMLPDVDGWRIVQALRDAKSSTPVLFLTARDSVEDRVKGLELGADDYLVKPFAFSELLARVR
>PT7_2012_HK_Classic|Pusillimonas_sp._T7-7|Pair_PT7_2011|HisKA_235-288/PT7_2011_RR_OmpR|Pusillimonas_sp._T7-7|Pair_PT7_2012|Response_reg_8-118	-QRTLLAGLPHDLKGPLSRMWLRIEMVDD-----PTFKDGMLKDVQDMQRMVNQFIGFAR----VLVVDDDPALRQLLADYLNRHNY-DTLLAPDASDLPARIQRYSPDLIVLDRMMPDGDGAEACRRLRQQGEDIPVILLTARDETVDRVIGLEAGADDYLGKPFDPRELLARIE
>PT7_2517_HK_Classic|Pusillimonas_sp._T7-7|Pair_PT7_2518|HisKA_457-521/PT7_2518_RR_YesN|Pusillimonas_sp._T7-7|Pair_PT7_2517|Response_reg_15-127	-KTETLSYVGHDLRAPLATIVGYARMLQASTPEQKNHIEAIERSANYQMSLIDEIVDYARHEQ--LIIDDRLDELRLLIELVRGQGY-RISIAFDGAQGYQRAQALQPDLILLDVHMPVLNGFNASRLLKNDPAHIPIIFLTSANDLNDRLEGLTNGGVDYVIKPFEQEEVLARIR
>PT7_2560_HK_Classic|Pusillimonas_sp._T7-7|Pair_PT7_2559|HisKA_535-603/PT7_2559_RR_unclassified|Pusillimonas_sp._T7-7|Pair_PT7_2560|Response_reg_4-114	-WGEVARRLAHEIKNPLTPIQLSAERLAMD----AASTNTIVSQVASLKKMVDDFREYAR----ILVVDDEIGIRELLSEILYDEGH-TVELAENAAQARAARLRSRPDLVLLDIWMPDTDGVSLLKEWGSQGLDMPVIMMSGHATVDTAVEATRIGAVDFLEKPITLQKLLKTI-
>PT7_2694_HK_Classic|Pusillimonas_sp._T7-7|Pair_PT7_2693|HisKA_220-277/PT7_2693_RR_OmpR|Pusillimonas_sp._T7-7|Pair_PT7_2694|Response_reg_10-120	----LLNLASHELRTPIAVMSGALDILESLNPNDQTTLKRIRKACDEMGDNINILLQLARRES--LIVEDHAGLATNLLEFFDNERY-ILDFASDGLTALHLIATNEYDVIILDVMLPGLSGFEICRRIRNDLRSTPVIIMTSKDQLRDKEEGFTVGADDYLIKPFNLRELQLRV-
>PT7_3379_HK_Classic|Pusillimonas_sp._T7-7|Pair_PT7_3380|HisKA_202-269/PT7_3380_RR_OmpR|Pusillimonas_sp._T7-7|Pair_PT7_3379|Response_reg_5-117	-RKDFVANVSHELRTPLTVLSGFLETLHDSDEQRQRYLAMMLEQAQRMQAIVEDLLTLSTLES-ILVVEDEPAIQELISVNLSFAGH-KVLRAFDAEQAQTLIRAELPDLILLDWMLPGASGITLARTLRSDERHVPVIMLTAKGAEHDKVEGLEAGADDYITKPFSPKELIARIK
>PT7_3651_HK_Classic|Pusillimonas_sp._T7-7|Pair_PT7_3650|HisKA_208-273/PT7_3650_RR_OmpR|Pusillimonas_sp._T7-7|Pair_PT7_3651|Response_reg_15-126	-QKEFSSNFNHEIRKPLSLIRTDAELGKLPTDKVVLRFERIMRSIDEMTESLEATYYLAQSEH-ILVVEDDAALAGNVLTALTLEGF-LVDAAYDGNMAIHALAERKFDLLVLDIGLPGKDGYQVLTHLRETLSEVPVILLTARGSLEDKKTGFTVGADDYLTKPFALEELVYRI-
>PT7_3681_HK_Classic|Pusillimonas_sp._T7-7|Pair_PT7_3680|HisKA_234-294/PT7_3680_RR_OmpR|Pusillimonas_sp._T7-7|Pair_PT7_3681|Response_reg_3-112	-QAQFLADASHQLRTPLAIMRTQAQYAKRDIARTRETLGAIVQQLGQASRLTEQLLSLAH----VLLVEDEREMAAWLERALAQSGF-LPEHAPDARTAESLLAASEYDAVIMDLRLPDKHGLVLLREMRNRGDVTPVLILTAQGALQDRVRGLNLGADDFLTKPFALEELEARL-
>Asd1617_00420_HK_Classic|Shigella_dysenteriae_1617|Pair_Asd1617_00421|HisKA_203-268/Asd1617_00421_RR_OmpR|Shigella_dysenteriae_1617|Pair_Asd1617_00420|Response_reg_5-117	ARRNFFANVSHELRMPLTVLQGYLEMMDEEGAVREKALHTMREQTQRMEGLVKQLLTLSKIEA-ILVVEDEAPIREMVCFVLEQNGF-QPVEAEDYDSAVNQLNEPWPDLILLDWMLPGGSGIQFIKHLKRESRDIPVVMLTARGEEEDRVRGLETGADDYITKPFSPKELVARIK
>Asd1617_01219_HK_Classic|Shigella_dysenteriae_1617|Pair_Asd1617_01218|HisKA_404-469/Asd1617_01218_RR_unclassified|Shigella_dysenteriae_1617|Pair_Asd1617_01219|Response_reg_88-194	AKSAFLAAMSHEIRTPLYGILGTAQLLADL-NAQRDDLRAITDSGESLLTILNDILDYSAIEAG-LLIEDNPLTQRITVEMLNTSGA-QVVAIGNAAQALETLQNSEFAAALVDFDLPDIDGITLARQLAQQYPSLVLFGFSAHVIDETLRQRTSSLFRGIIPKPVPREVLGQ---
>Asd1617_02450_HK_Classic|Shigella_dysenteriae_1617|Pair_Asd1617_02449|HisKA_211-269/Asd1617_02449_RR_OmpR|Shigella_dysenteriae_1617|Pair_Asd1617_02450|Response_reg_17-119	SKKQLIDGIAHELRTPLVRLRYRLEMSD---NLSAAESQALNRDISQLEALIEELLTYARLDR-IVFVEDDAEVGSLIAAYLAKHDM-QVTVEPRGDQAEETILRENPDLVLLDIMLPGKDGMTICRDLRAKW-SGPIVLLTSLDSDMNHILALEMGACDYMP-------------
>Asd1617_02959_HK_Classic|Shigella_dysenteriae_1617|Pair_Asd1617_02958|HisKA_240-304/Asd1617_02958_RR_OmpR|Shigella_dysenteriae_1617|Pair_Asd1617_02959|Response_reg_13-122	MRRDFMADISHELRTPLAVLRGELEAIQDVRKFTPETMASLQAEVGTLTKLVDDLHQLSMSDEGILIVEDEPKLGQLLIDYLRAASY-APTLISHGDQVLPYVRQTPPDLILLDLMLPGTDGLTLCREIRRFS-DIPIVMVTAKIEEIDRLLGLEIGADDYICKPYSPREVVARV-
>Asd1617_04914_HK_Classic|Shigella_dysenteriae_1617|Pair_Asd1617_04913|HisKA_237-299/Asd1617_04913_RR_NtrC|Shigella_dysenteriae_1617|Pair_Asd1617_04914|Response_reg_8-118	ALGHLAAGVAHEIRNPLSSIKGLAKYFAEAGGEAHQLAQVMAKEADRLNRVVSELLELVK----ILVVDDDISHCTILQALLRGWGY-NVALANSERQALEQVREQVFDLVLCDVRMAEMDGIATLKEIKALKPAIPVLIMTAYSSVETAVEALKTGALDYLIKPLDFDNLQATL-
>DMR_01560_HK_Classic|Desulfovibrio_magneticus_RS-1|Pair_DMR_01550|HisKA_355-418/DMR_01550_RR_OmpR|Desulfovibrio_magneticus_RS-1|Pair_DMR_01560|Response_reg_4-113	-QKRLLRDISHELRSPLARLNVALELARQAGPSAVTYLDRMERESSRLNELIGQLLTLARLEG--LLIDDDMELCELLGDYLHGEGF-DTESVHNPMVGVTRAVSGQHDLVVLDVMMPELNGFEVLRRIRAAS-QIPVLMLTARGEDVDRIVGLEIGADDYLPKPFNSRELVARIR
>DMR_01990_HK_Classic|Desulfovibrio_magneticus_RS-1|Pair_DMR_02000|HisKA_248-315/DMR_02000_RR_NtrC|Desulfovibrio_magneticus_RS-1|Pair_DMR_01990|Response_reg_7-117	--GMLAAGVAHEINNPLTAVYGLAEGIRRLYGDVAEYTETILMECRRCRDIVRSMLSFSRP---VLVVDDEPSIGKLLLKELTTPAR-AVHVAASAREARELLAKNEYEVAVLDIRLPDANGLDLMVELRQRQEDLETILITGHGAIDTAVEAMKLGAFDYVTKPFNLAELELL--
>DMR_02390_HK_Classic|Desulfovibrio_magneticus_RS-1|Pair_DMR_02400|HisKA_175-242/DMR_02400_RR_NtrC|Desulfovibrio_magneticus_RS-1|Pair_DMR_02390|Response_reg_7-117	--GMLATGVAHEVNNPLTAIFGFAEGLRRVMEDVEDYVATILRECRRCQDIVTTLLTFSRQ---VLVVDDEPSIGKLLKKELSTPSR-LVSTAETAHQAREALRRNTYEVAVLDLRLPDADGLDVLVELRQHSPDIEVIIITGHGNIDSAVEAMKLGAYDYITKPFNLEELELV--
>DMR_02630_HK_Classic|Desulfovibrio_magneticus_RS-1|Pair_DMR_02640|HisKA_240-306/DMR_02640_RR_OmpR|Desulfovibrio_magneticus_RS-1|Pair_DMR_02630|Response_reg_6-118	-RRDFAANVTHELRTPLTSIKGYAETLLGLAAEKRRFLEVILKNANHMSKMVDDILNLARLEDGILIVEDDEDIVELLAFNLQSAGF-AAETARDGYEGLAKARRNPPAAVILDLMLPGLDGFEVCKELKRDPASAPIIMLTARGEEVDRIVGLELGADDYVVKPFSPRELVLRL-
>DMR_03900_HK_Classic|Desulfovibrio_magneticus_RS-1|Pair_DMR_03910|HisKA_91-161/DMR_03910_RR_CheY|Desulfovibrio_magneticus_RS-1|Pair_DMR_03900|Response_reg_8-118	--GEMAAGLAHEINNPVAIMMEEAGLGGDL-AELRRALGQIETQGARCKEITHMVLAFAR----VLLVDDEEGFTEVLAKRLRRRGF-HAVVALTGAEALAAVAGQPFDVAVVDYRLSDADGLTLLPRLREAQPGLAALMLTGHGSEEAARESLAAGAAGHLVKPCEIEELAAAIR
>DMR_04990_HK_Classic|Desulfovibrio_magneticus_RS-1|Pair_DMR_04980|HisKA_620-678/DMR_04980_RR_PleD|Desulfovibrio_magneticus_RS-1|Pair_DMR_04990|Response_reg_129-241	---VLAAGVAHDFNNILTPILLNSELLSDL-HPLRKPLSDVVLASERARDLVRQLLAFSRQG--VLVVDDSSTVRRHLMRLLEAHEF-IVHEAENGETALDAISRHPIKVVIADYFMPGLDGVELTRRIRRLRDELAVIGISAYGNTILSARFIKNGANDFLNKPFSSEEFY----
>DMR_07800_HK_Classic|Desulfovibrio_magneticus_RS-1|Pair_DMR_07810|HisKA_204-264/DMR_07810_RR_OmpR|Desulfovibrio_magneticus_RS-1|Pair_DMR_07800|Response_reg_5-114	---EMTAHVSHELRSPLTRIDIARQLLEDATDKQRELLDSMREETEGMDALIERILRLSRLE--VLIIDDDLKLRKMLGDYLAGYGY-EVRELPDGGEAAKALEQLRPSVVILDIMMPGKDGLEVLADIRRAS-TVPVIMLTAKGDPMDRVVGLEMGADDYLPKPFNLRELLARIR
>DMR_09250_HK_Classic|Desulfovibrio_magneticus_RS-1|Pair_DMR_09240|HisKA_667-734/DMR_09240_RR_OmpR|Desulfovibrio_magneticus_RS-1|Pair_DMR_09250|Response_reg_8-117	--AALLSTVTHDFKTPLSAIAGSAESLLATPEVRRSLEENIAQEASRLERLVDNLLRIAALESGILIVDDEPPIRRFLTPFLEAEGY-AVVEAGLGREALSLIASHEPDVILLDLGLPDMDGEELLRALPMWV-RAKVIVLSVRARERDKVTALDLGASDYLTKPFSLAELAARIR
>DMR_10790_HK_Classic|Desulfovibrio_magneticus_RS-1|Pair_DMR_10800|HisKA_333-398/DMR_10800_RR_NtrC|Desulfovibrio_magneticus_RS-1|Pair_DMR_10790|Response_reg_6-115	SLGVLTSGIAHQLNNPLNNISTSCQILIEEPAFAGRMLTNIQQEVLRARDIVKGLLEFSRA---VLVVDDEAIAVENLSHILAREGY-DVAAAASGEAAVGLLADREFDLVLTDLRMKGLDGLAVLGEAKRLWPDTEVVVMTGHATVFSAVEAMRLGACHYLTKPYGLAEVRATV-
>DMR_14250_HK_Classic|Desulfovibrio_magneticus_RS-1|Pair_DMR_14240|HisKA_463-550/DMR_14240_RR_NtrC|Desulfovibrio_magneticus_RS-1|Pair_DMR_14250|Response_reg_15-126	SLGVLVAGMAHEINNPNSVITLNLPLLQELRDQMPDLLARMFEGAARIRGIVGSLKNFSRH---VLLVDNEEAWLRSFQNALRASGVDNVMTLSDSRLVLETLGRQQYCAVAVDLMMPHIAGEELIPLILAEHPELPVLVISGLNQIKTAINCIRLGAFDFIVKTESRNTLIAGI-
>DMR_16190_HK_Classic|Desulfovibrio_magneticus_RS-1|Pair_DMR_16180|HisKA_385-445/DMR_16180_RR_NtrC|Desulfovibrio_magneticus_RS-1|Pair_DMR_16190|Response_reg_4-114	--GKLAAGVAHTIRNPLTSVKMRLFSLERLDASQQEDFEVIAEEIGHIDTIVRNFLEFAR----ILIVDDDHQLRQSFERLLAAEGH-DVRAASSGEAGIAAVREAVPDAVVMDVRMSGISGLEAYAAMREIEPRLPVIIMTAYGTTEIAIEATKMGAYDYILKPFDIPEILKLI-
>DMR_19620_HK_Classic|Desulfovibrio_magneticus_RS-1|Pair_DMR_19630|HisKA_387-449/DMR_19630_RR_NtrC|Desulfovibrio_magneticus_RS-1|Pair_DMR_19620|Response_reg_5-115	--GNLAAGVAHEIRNPLSSIRGYAAYFGGPGSEDRQAAEIMVREVDRLNRVISELIEFSR-----LVVDDDAGHLSMLRTVLTGWGY-GVTGATDGAEAVELVRSRPFDAVLLDVRMAGMGGMEALSLIKEYNPAVPVLIMTAYSSVETAVSALKSGAYDYLTKPLDLDVMRLT--
>DMR_24420_HK_Classic|Desulfovibrio_magneticus_RS-1|Pair_DMR_24410|HisKA_433-503/DMR_24410_RR_unclassified|Desulfovibrio_magneticus_RS-1|Pair_DMR_24420|Response_reg_4-113	-LGEMSAGIAHELNQPLNAIKMGSDYLKMSPVALAAVTGQVSEQVDRAAAIIGHLRDFGRK---ILVIDDERPTLQMFELYLGAYGY-KTLTAASGEEGLAVFDAQTPPIVLTDIKMPGMDGLQVLEAIKARRPETEVIVITGHGDTDLALAALGLRATDFIDKPIRRETLEAAL-
>DMR_28670_HK_Classic|Desulfovibrio_magneticus_RS-1|Pair_DMR_28680|HisKA_163-221/DMR_28680_RR_CheY|Desulfovibrio_magneticus_RS-1|Pair_DMR_28670|Response_reg_6-117	--------ARHDLKAPLSALIGLPQVLLELPPEAAHIVSLMEQAAHSMLDMLNQSLVLYRLE--ILVVDDSGLTVKKMAKLLEELGHHVVAMASTGQQAVDVYAEAAPDVTTMDITMPDMDGIEATRRILAVHPGACIVIVTSHGQEQMVMDAIEAGAKGYILKPVKQEKLAETL-
>DMR_33170_HK_Classic|Desulfovibrio_magneticus_RS-1|Pair_DMR_33180|HisKA_597-658/DMR_33180_RR_NtrC|Desulfovibrio_magneticus_RS-1|Pair_DMR_33170|Response_reg_7-114	--GKLAAGLAHEINNPLGVIACYAELLRQVDPQALDDLAVIERHAVMAKKVLRDLLDFARP---VLIVDDQPDFAKGLVRLLTKLPKAALSCVLSAEAALDDLAGAPCDVMVTDLRMPGLSGLELLPRALALQPSLGVVLLTAHGDIDSAVLALKAGAYDFLTKPVDSDHLARVI-
>DMR_38700_HK_Classic|Desulfovibrio_magneticus_RS-1|Pair_DMR_38710|HisKA_435-497/DMR_38710_RR_CheY|Desulfovibrio_magneticus_RS-1|Pair_DMR_38700|Response_reg_4-109	SLGKLAGGVAHEINTPLGVILGYSQLLQEGGSQIQADLQTIEKQAKVCRKIVADLLGFSRQ---IIVLDDVIDAGVVIKRILERKGH-RVAVFTEEEEALAHVAKKHPDLAILDMKLKKLSGVEVLEEIRKRSPETRVIMLTGYPTLETARESVRLGACEYCVKPIDKDELERKV-
>DMR_39170_HK_Classic|Desulfovibrio_magneticus_RS-1|Pair_DMR_39180|HisKA_893-963/DMR_39180_RR_PleD|Desulfovibrio_magneticus_RS-1|Pair_DMR_39170|Response_reg_19-128	-MGEMIGNIAHQWRQPLNALSILLANLRFY-EAVCQALDTAHRQAYRMSATIDDFRNFFKPD--ILVAEDDRFAREQLSLLLSRFAG-RVSTAADGMEGLDAFKYDRPDIVVTDINMPRLSGLDMAQAIKAMDPSVPVILVTAHSDAQFFLRSIEIGIDGYVIKPLDADSLLKLL-
>DMR_40080_HK_Classic|Desulfovibrio_magneticus_RS-1|Pair_DMR_40070|HisKA_345-413/DMR_40070_RR_CheY|Desulfovibrio_magneticus_RS-1|Pair_DMR_40080|Response_reg_8-117	-IGRLAAGVAHEINNPLAVINEKTGLMRDDKERYLLLIDSVLKTVMRCRDITRRMLGFAR----ILLVDDEREFTATLAERMELRGL-TVRCVYSGEEALKEIAADKPDVVVMDVMMPGLKGLDILRHIKATNPEIQVILLTGQAGTRDGMEGMKLGAFDYLLKPLELDALLGKI-
>DMR_42460_HK_Classic|Desulfovibrio_magneticus_RS-1|Pair_DMR_42470|HisKA_507-572/DMR_42470_RR_CheY|Desulfovibrio_magneticus_RS-1|Pair_DMR_42460|Response_reg_4-126	-KSIFLDNMSHEIRTPINGVNGMLHLMQSLDDEQRLYIENAKFACTRLSKLLTAILDYTTLEA--LIVDDDFYSRSFLEYILH--PYARCDAAVNGEDAVMAFQKALYGLVFMDLLMPVIDGPRALKEIREIEKDAKIVITSVLEDGEDTHNAMLGGATSFLQKPVDEGSILAEL-
>DMR_45890_HK_Classic|Desulfovibrio_magneticus_RS-1|Pair_DMR_45900|HisKA_245-310/DMR_45900_RR_OmpR|Desulfovibrio_magneticus_RS-1|Pair_DMR_45890|Response_reg_3-113	--REALDNVAHDLRTPATRTLAAVEMAVADPAELREALLDCAEETRRMVAMLGALMDISEAETGILLVEDDEKIASFILGGLRQSGF-AVDHAANGPDGLHLAATEPYCVAIIDVMLPGLDGLQVIEELRRRKIMTPIIILSAKRSVEDRVRGLETGGDDYLSKPFSFAELLARVQ
>DMR_45940_HK_Classic|Desulfovibrio_magneticus_RS-1|Pair_DMR_45950|HisKA_264-326/DMR_45950_RR_NtrC|Desulfovibrio_magneticus_RS-1|Pair_DMR_45940|Response_reg_5-115	-MGRMVAGIAHEIRNPLGIIRSTAELLKRADPANARLLSAIFDESKRLSKTVGDFLDYARP---ILILDDEKNYLLILETMLGDAGY-AVTALDDPETGLAFLDESEVDVVITDMKMPKVTGQQVLEHVKRNYPYIPVIIMTAFGSIEGAVEAMRIGAFDYIAKPFANDELLLTV-
>Gbro_0823_HK_Classic|Gordonia_bronchialis_DSM_43247|Pair_Gbro_0822|HisKA_263-327/Gbro_0822_RR_OmpR|Gordonia_bronchialis_DSM_43247|Pair_Gbro_0823|Response_reg_16-126	-MRRFIADASHELRTPLTSIKGFAELYRQV-PDATDAMRRIDDEAGRMTLLVEDLLVLARLDA-ILVVDDEENIRQLLSVSLKFQGY-EVETAESGPAAIDRCRTFKPDALILDVMMPGMDGFGLLRRLRADGIEAPALFLSARDSVEDKINGLTIGGDDYVTKPFSLEEVVARL-
>Gbro_0996_HK_Classic|Gordonia_bronchialis_DSM_43247|Pair_Gbro_0997|HisKA_209-274/Gbro_0997_RR_OmpR|Gordonia_bronchialis_DSM_43247|Pair_Gbro_0996|Response_reg_4-113	-RRDFVANVSHELKTPVGAIGLLAEAMLEDADSVQHFGRRVVAESARMGNMVSELIALSRLQGGVLIVEDEESLADPLAFLLRKEGF-EASVVNDGAQALSTFDRVSPDIVLLDLMLPGMSGTEICKALRTRS-SVPVIMVTARDSEIDKVVGLELGADDYVTKPYSARELIARIR
>Gbro_1397_HK_Classic|Gordonia_bronchialis_DSM_43247|Pair_Gbro_1396|HisKA_263-335/Gbro_1396_RR_OmpR|Gordonia_bronchialis_DSM_43247|Pair_Gbro_1397|Response_reg_3-113	-QARLVADAGHELRTPLTSLRTNLELLIAPTEDMVELRSDVMAQIEELSTLVGDLVDLAREDA-ILVVDDDRAVRESLRRSLTFNGY-AVDTAGDGIEALEKIVSDRPDVAIMDVMMPRLDGLEVCRRLRSAGDDLPILVLTARDTVSERVSGLDAGADDYLPKPFALEELLARL-
>Gbro_1845_HK_Classic|Gordonia_bronchialis_DSM_43247|Pair_Gbro_1844|HisKA_213-273/Gbro_1844_RR_OmpR|Gordonia_bronchialis_DSM_43247|Pair_Gbro_1845|Response_reg_4-114	--GEIVGDVSHQLRSRLTAIQLRLDELSMPDPEVVTEAEAALAQVERLSTELDEMVAASRDD--VLLAEDDAAIAEPLARALSREGY-GCEVVTTGTAALEQAMDNRFELLILDLGLPEVDGLEACRRIRTQRPALAVLMLTARTDEVDFVVGLDAGADDYVGKPFRLAELLARVR
>Gbro_2605_HK_Classic|Gordonia_bronchialis_DSM_43247|Pair_Gbro_2604|HisKA_151-213/Gbro_2604_RR_OmpR|Gordonia_bronchialis_DSM_43247|Pair_Gbro_2605|Response_reg_13-121	-RKRMLSDLAHELRTPLTTIGAITDAIEDIRAPDSHTFDVVRTATTRLQRLAEDIATVSSAD---LVIEDEPDIAEVVADYLQRSGF-TVTVAPDGQEGVAAARTASPAVVILDLGLPSLDGVEVCRQLRTFT-NAYIVMVTARADEVDTVVGLSVGADDYLTKPFRPRELMARI-
>Gbro_4089_HK_Classic|Gordonia_bronchialis_DSM_43247|Pair_Gbro_4088|HisKA_618-685/Gbro_4088_RR_OmpR|Gordonia_bronchialis_DSM_43247|Pair_Gbro_4089|Response_reg_7-116	-RRALLSAVSHDLRTPLAAAKAAVSSLRSSPEDTEELLATIEESTDQLSALVGNLLDSSRLAAGVLVVDDEPQLLRALRINLNARGF-AVTTAADGREALTAASRMDPHVVVLDLGLPDMDGLTVLEGLRGWT-TVPVIVLSARSDAADKVSALDAGADDYVTKPFGMEEFLARL-
>Gbro_4232_HK_Classic|Gordonia_bronchialis_DSM_43247|Pair_Gbro_4233|HisKA_151-213/Gbro_4233_RR_OmpR|Gordonia_bronchialis_DSM_43247|Pair_Gbro_4232|Response_reg_13-121	-RKRMLSDLAHELRTPLTTIGAITDAIEDIRAPDSQTFDVVRTATTRLQRLAEDIATVSSAD---LVIEDEPDIAEVVADYLQRSGF-TVTVAPDGQEGVAAARTASPAVVILDLGLPSLDGVEVCRQLRTFT-NAYIVMVTARADEVDTVVGLSVGADDYLTKPFRPRELMARI-
>Gbro_4259_HK_Classic|Gordonia_bronchialis_DSM_43247|Pair_Gbro_4258|HisKA_262-324/Gbro_4258_RR_OmpR|Gordonia_bronchialis_DSM_43247|Pair_Gbro_4259|Response_reg_4-114	-QRQFVDDAGHELRTPITVVRGHLELLPDDPEERAKTLALVDSELVRMGRIVSDLLMLAKAEQ-ILIAEDDVQIASFVGKGLRAAGY-TVEHVADGETALLMGRSPEIDMILLDIGLPAMDGFSVLQQLRGEGVSTPVVVLTARDSVTDTVAGLEGGANDYMTKPFQFAELLARVR
>C380_00060_HK_Classic|Acidovorax_sp._KKS102|Pair_C380_00055|HisKA_227-281/C380_00055_RR_OmpR|Acidovorax_sp._KKS102|Pair_C380_00060|Response_reg_9-119	--MQILAAVSHDLQTPITRLRLRADLLDDLRDKLHADLAEMQSLVEDLRALVESI---------ILIVDDDAGIRELAAEYLQRQGL-QVSVAADGRQMREVLATQRIDLLVLDLMLPGTDGITLCRELRSPGPPLPIIMLTARSDEADRILGLELGADDYLTKPFAARELLARI-
>C380_01545_HK_Classic|Acidovorax_sp._KKS102|Pair_C380_01550|HisKA_206-263/C380_01550_RR_OmpR|Acidovorax_sp._KKS102|Pair_C380_01545|Response_reg_18-135	--KSLLANASHELRSPLTRIRMGLELMGG-QQPSPAFREEILRNIAELDQLVDEILLASRLDA--LMIEDDARLAQMVGEYLGQSGL-QVTHRADGKSGLAQLQGPDPDLVILDLMLPDMDGLEVCRRIRSLQAQVPVLMLTAKGDPMDRIIGLELGADDYLPKPFEPRELLARIR
>C380_01760_HK_Classic|Acidovorax_sp._KKS102|Pair_C380_01765|HisKA_279-338/C380_01765_RR_OmpR|Acidovorax_sp._KKS102|Pair_C380_01760|Response_reg_5-117	-----VRALTHELKSPVAAIRGAGELLQDPAADRAEFATQVVQQSERLQRIIDRLLELSKLEQ--LLLEDDPAIARTVAYALERDGL-TVTHSLLVYDARQQLQRTRFDLLVLDVGLPDGSGLDLLRDVRNAPAALPVLMLSAHGEEIDRVLGLELGADDYLTKPFSPRELAARV-
>C380_02145_HK_Classic|Acidovorax_sp._KKS102|Pair_C380_02150|HisKA_523-592/C380_02150_RR_PrrA|Acidovorax_sp._KKS102|Pair_C380_02145|Response_reg_4-115	-WGEVARRLAHEIKNPLTPIQLSAERLEMEQAILAKSVKTIVDQVDAMKRLVNEFRDYARLP--ILVVDDELGIRDLLSEILNDEGH-SVDLAENATQARAARAGNSYDLVLLDIWMPDTDGVSLLKEWATAGLTMPVIMMSGHATIDTAVEATRIGAFSFLEKPITLQKLLKAVE
>C380_03250_HK_Classic|Acidovorax_sp._KKS102|Pair_C380_03245|HisKA_234-324/C380_03245_RR_OmpR|Acidovorax_sp._KKS102|Pair_C380_03250|Response_reg_3-116	-QRRFVADAAHQLRTPLAGLQAQVEAWAMAHEDRAQQIEKLRNATRRTSQLAHQLLALSRADA--LLVEDDVMVASGIKLGLTDAGY-AVDWVGSGERAEEVLRAESFDAAIIDIGLPAMDGLELTRRLRRPDPAMPVLILTARDALHDRVQGLDLGADDYMVKPFELPELLARL-
>C380_04020_HK_Classic|Acidovorax_sp._KKS102|Pair_C380_04025|HisKA_251-314/C380_04025_RR_OmpR|Acidovorax_sp._KKS102|Pair_C380_04020|Response_reg_4-114	--KRFLNDAAHQLRTPLAGLIGQTELLHEHEPAVQARLQKVLSAAQRSAHLVHQLLQLARSES-ILIVEDDALLLDALTGQLKQLDY-SVCTASSVAQAMALLQTQAVDGIILDLGLPGADGMELLTWARAHIAGLPVLILTARDGVDDRVLGLNAGADDYITKPFNMQELQARL-
>C380_05640_HK_Classic|Acidovorax_sp._KKS102|Pair_C380_05635|HisKA_237-303/C380_05635_RR_OmpR|Acidovorax_sp._KKS102|Pair_C380_05640|Response_reg_3-113	-LSEFSSDLAHELRTPINNLMTQTQVTLSSSEEYQDILASNAEEYQRLARMVADMLFLAKADHGILIVEDEIKTGEYLRQGLREAGF-NADLVHNGVDGLHLAQEGDYDLVILDVMLPGMDGWQVLTNLRRRGLEMPVLFLTAKDQVQDRIKGLELGADDYLVKPFSFAELLARA-
>C380_05845_HK_Classic|Acidovorax_sp._KKS102|Pair_C380_05840|HisKA_225-290/C380_05840_RR_OmpR|Acidovorax_sp._KKS102|Pair_C380_05845|Response_reg_3-112	--EGFNADVAHELCTPLATLIANNELALRDQADMQEVIASNLEELHRLTGIVNDMLFLSQADRGILLIEDEVKLAEYLRKGLGEVGY-VVDVAHNGVDGLHMALEGGHDLLVLDAMLPGIDGFSLLTAFRKSR-QTPVLMLTARVSVEDRVLGLQTGADDYLVKPFAFSELNARIQ
>C380_06135_HK_Classic|Acidovorax_sp._KKS102|Pair_C380_06140|HisKA_237-303/C380_06140_RR_OmpR|Acidovorax_sp._KKS102|Pair_C380_06135|Response_reg_3-113	-LSEFSSDLAHELRTPINNLMTQTQVTLSSPHEYRNILASNAEEYQRLARMVADMLFLAKADHGILIVEDEIKTGEYLRQGLREAGF-NADLVHNGVDGLHLAQEGDYDLVILDVMLPGMDGWQVLTNLRRRGLEMPVLFLTAKDQVQDRIKGLELGADDYLVKPFSFAELLARA-
>C380_06220_HK_Classic|Acidovorax_sp._KKS102|Pair_C380_06225|HisKA_226-291/C380_06225_RR_OmpR|Acidovorax_sp._KKS102|Pair_C380_06220|Response_reg_3-112	--EGFNADVAHELCTPLATLIANNELLLREQADIREVLASNLEELHRLTGIVNDMLFLSQADRGILLIEDEVKLAEYLRKGLGEAGY-VVDIAHNGVDGLHMALEGVHDLLVLDAMLPGIDGFSLLTAFRKTK-QTPVLMLTARVSVEDRVLGLKTGADDYLVKPFAFSELSARIQ
>C380_08505_HK_Classic|Acidovorax_sp._KKS102|Pair_C380_08510|HisKA_139-196/C380_08510_RR_NtrC|Acidovorax_sp._KKS102|Pair_C380_08505|Response_reg_6-122	--KELIRNLAHEIKNPLGGIRGAAQLLEMDNRELTEYTQVIIHEADRLQSLVDRLLAPHR----IWIVDDDPSIRFVLEKALARENL-PTRSFTHPREVLDALARQGPQVLVSDIRMPGGSGLQLLEKVRELQPGLPVIIMTAYSDLDSAVSAFQRGAFEYLPKPFDLPKAVELI-
>C380_09305_HK_Classic|Acidovorax_sp._KKS102|Pair_C380_09300|HisKA_205-269/C380_09300_RR_OmpR|Acidovorax_sp._KKS102|Pair_C380_09305|Response_reg_7-119	MRRDFVANVSHEIRTPLTVLTGFVETLQTSADERSRYLGMMAQQAQRMQSVVQDLLTLSRLEG-VLIVEDEPAIAELIAVNLRHNGF-QPFWAEDGDSAQRELDAVLPDVILLDWMLPGQSGLSLARKWRADSKPIPILMLTARGDEPDKVAGLDAGADDYITKPFSTQELLARIR
>C380_10370_HK_Classic|Acidovorax_sp._KKS102|Pair_C380_10375|HisKA_256-321/C380_10375_RR_OmpR|Acidovorax_sp._KKS102|Pair_C380_10370|Response_reg_3-121	-QREFAGNVAHELRTPLAGIRAQAAHALADPAVWRSEIEGIAQAEQRASRTVDQLLALARAAE--LLVEDDPVLSRTMAQGLENAGH-RVELAHTVEEAQHWWAVQAFDAVLLDLNLPHASGLTALRAARARGDRTPVLVLSARDSTEERIAGLDAGADDYLGKPYELKEVEARL-
>C380_11405_HK_Classic|Acidovorax_sp._KKS102|Pair_C380_11400|HisKA_600-669/C380_11400_RR_NarL|Acidovorax_sp._KKS102|Pair_C380_11405|Response_reg_10-120	-MGEMASSVAHELNQPLTAINNYCSGMSRTEEALLTALQKTAHQAQRAGQIIQRIRSFVKK---VYVVDDDEAVRDSLQWLLEGKDY-RVRCFDSAETFLSRYDPREVACLIVDIRMGGMTGLELQDRLIERKSPLPIVFITGHGDVPMAVNTMKKGALDFIQKPFDEEELVGLV-
>C380_11880_HK_Classic|Acidovorax_sp._KKS102|Pair_C380_11875|HisKA_250-312/C380_11875_RR_OmpR|Acidovorax_sp._KKS102|Pair_C380_11880|Response_reg_3-113	-QRRFLADATHQLRTPMAVLRTQLQAAMAGDMLVGDALQQMLHTVDRASGLANQLLSLSKVEQ--LLVEDDFDLAGALSRSLVARGF-EVLCCADGKEALAAARRTAFDVITLDLSLPGLDGLEVLRRLRDGGSTTPVLALTARAAVTDRVAGLEAGADDYLAKPFDLDELVARL-
>C380_12765_HK_Classic|Acidovorax_sp._KKS102|Pair_C380_12770|HisKA_670-736/C380_12770_RR_OmpR|Acidovorax_sp._KKS102|Pair_C380_12765|Response_reg_8-117	-RNSLLSAISHDLRTPLASLVGLAESLAMLPAHQQELTGAIQQSAQRMSALVNNLLDMARLEAGILIVEDEADIRRFVRLTLETEGH-TVHEAATLQRGLIEAGTRRPDLVVLDLGLPDGDGVDLIRDLRTWS-AMPIIVLSARSAEASKIAALDAGADDYLVKPFGSGELMARVR
>C380_13555_HK_Classic|Acidovorax_sp._KKS102|Pair_C380_13560|HisKA_239-298/C380_13560_RR_OmpR|Acidovorax_sp._KKS102|Pair_C380_13555|Response_reg_4-113	-KRALLLAMSHELRSPLTRARLNTELLPETADVQPQRLALM-RDLGEMAGLITDLLESERL---ILLIDDDAQLGAPLATYFQRFEL-ELVHALRPSDGLAQLTAGGFDAAILDVMLPEMDGFELCRTIRKQG-DLPIVMLTARGEVMDRVVGLELGADDYLPKPFEPRELVARL-
>C380_15195_HK_Classic|Acidovorax_sp._KKS102|Pair_C380_15190|HisKA_270-324/C380_15190_RR_OmpR|Acidovorax_sp._KKS102|Pair_C380_15195|Response_reg_11-120	----MLAGISHDLRTPLARLRLETEMS----VTDEVAREHMVADIVQLDATIDKFLDYARPD--VLVVDDDARIRDLLRRYLTQEGF-EVMVAEDGKALNRLLLRETVDIIVLDLMMPGEDGLSICRRLRAANDRTPIIMLTAKGEDVDRIVGLEVGADDYLGKPFNPRELLARI-
>C380_15680_HK_Classic|Acidovorax_sp._KKS102|Pair_C380_15685|HisKA_320-376/C380_15685_RR_OmpR|Acidovorax_sp._KKS102|Pair_C380_15680|Response_reg_5-114	SRRQWLGDVAHELRTPLAAMRAEIEAVQDIRPFDDKTALRLHRQVMRLIQLVGDLR--------ILVVEDEPDIAAIVVDYLRHAGY-AVEHQAEGRAALASMLTTPPDLTLLDIMLPGMDGLEMLRQARRHT-QHPIIMLTARVEELDRLIGLELGADDYICKPFSPREVVARV-
>C380_16130_HK_Classic|Acidovorax_sp._KKS102|Pair_C380_16125|HisKA_244-308/C380_16125_RR_OmpR|Acidovorax_sp._KKS102|Pair_C380_16130|Response_reg_3-113	-QRQFLDDASHQLRTHLTTLQMQIDYARRDSTQVQHTLAAIGGEIARATRSTQQLLALGRSDT-ILLAEDDHNLGTWLSRALEHAGI-QVEWVNDGRLADRALQQHDYDALVLDLGLPGLDGQAVLQRLRDRDQRLPALILTARDSLDERVRSLNAGADDFLAKPFELAELEARL-
>C380_16440_HK_Classic|Acidovorax_sp._KKS102|Pair_C380_16435|HisKA_253-314/C380_16435_RR_OmpR|Acidovorax_sp._KKS102|Pair_C380_16440|Response_reg_16-126	-QKRFVRDASHQLRTPLAVLKTQVQSALHGDVEPQQALHEISDTVDRATLLANQMLALAKVEQ--LLVEDDPTMQATLHRALTRRGM-EVTAVGDGRAALSQWTALQPDAVILDLTLPGLDGLQVLQQARSRGLRTPVLILTARGTVGDRVMGLNAGADDYLPKPFDLDELEARL-
>C380_16870_HK_Classic|Acidovorax_sp._KKS102|Pair_C380_16875|HisKA_222-282/C380_16875_RR_PrrA|Acidovorax_sp._KKS102|Pair_C380_16870|Response_reg_10-119	-MGLLASGAAHELGTPLSTLAVILGDWQHSNAALKEDIAEMQTQVQRCKSIVSGIL---------LIVEDDEAFARTLARSFERRGY-SVLQAASLADVEVLLEQHQPGYAVVDLKLKGASGLACVQTLHAADEEMLIVVLTGFASIATAVEAVKLGACHYLAKPSNTDDIEAA--
>C380_18520_HK_Classic|Acidovorax_sp._KKS102|Pair_C380_18525|HisKA_504-566/C380_18525_RR_NarL|Acidovorax_sp._KKS102|Pair_C380_18520|Response_reg_18-128	--GEMASTLAHELNQPLAALVNYAAAARAKTGPLNDSLEALSAQALRAADIVGRIRRW------VYIVDDDEGVRQSLAALLLARGY-TVHTFGGGESFLAEAALDHPGCVLLDLRMEGLSGLQVFHELGQRHSALKTVFLSAHGELSSAVAAVKQGAVDWLEKPCNEATLLAAVE
>C380_18705_HK_Classic|Acidovorax_sp._KKS102|Pair_C380_18700|HisKA_251-313/C380_18700_RR_OmpR|Acidovorax_sp._KKS102|Pair_C380_18705|Response_reg_3-116	--RAFVQDAAHEIRTPLAVITAQAHVMARSEEERTQAQAHLEQAIARTSHLAQQLLDLAALD--ILLIEDDLDLGRALQSALKVEGL-TSEWLRRAVDAPATVDATTIDCVLLDLTLPDGSGFDLLARWRAQMGQVPIIVITARSAVEDRLAGLDGGADDFVIKPFATAELMSRIR
>C380_19475_HK_Classic|Acidovorax_sp._KKS102|Pair_C380_19480|HisKA_230-294/C380_19480_RR_OmpR|Acidovorax_sp._KKS102|Pair_C380_19475|Response_reg_3-113	-QQHFVADAAHELRSPLAALRLQLQGLQRDDAARAAAIERLSAGIERATRLVEQLLTLARQEA--LLVEDDSMIGEAVLDLLRAEQY-AVDWARDGDAADTALRTQAYDLVLLDLGLPKRDGLAVLRDLRARKNRTPVLVATARDAVAQRIEGLDAGADDYVLKPYDLDELLARIR
>C380_19820_HK_Classic|Acidovorax_sp._KKS102|Pair_C380_19825|HisKA_328-393/C380_19825_RR_NtrC|Acidovorax_sp._KKS102|Pair_C380_19820|Response_reg_8-117	AMGRMSAAVAHEIRNPLAAIVQANALLEEHEPAQKRLAHMVQQNADRLARIAEEVLDIARVQH-ILVVDDEPDLRTLYELTLLREGY-RVETASNVQEAREQLKAQRFDAVITDMRLPDGFGMELLQDLRDQQRRERCVVMTAYGSAENAVEALRAGAFDYLTKPVDLKQFRSVV-
>C380_20635_HK_Classic|Acidovorax_sp._KKS102|Pair_C380_20630|HisKA_473-538/C380_20630_RR_NarL|Acidovorax_sp._KKS102|Pair_C380_20635|Response_reg_1-98	-KNMFLATASHDLRQPVHAMSLMVETILRTDPVLRPLVADLRASMQAMSQLFNALLDLSRLESG-----------HGMAEFLRMPQM-DVVVASGADDLLRWVGTRGPAIVLVDFWLAEGSALGLIAQVRAHCPGTPIAVISGDDDPAVMAQARQAGAQGFIHKQAAPDTF-----
>C380_21370_HK_Classic|Acidovorax_sp._KKS102|Pair_C380_21375|HisKA_280-343/C380_21375_RR_NarL|Acidovorax_sp._KKS102|Pair_C380_21370|Response_reg_12-122	-LGELAAGMAHELNQPLTALLSSTQAAQRL-DTAQTAMARAVEQARRASTVVGRLRRL------IHLVDDDAAVREGLALLIGTVGL-RVQTWADPQSFMAGFDRASIGAIVLDVRMPGISGLTVLEQLLAQGVDQPVILLTGHGTVEMCRRAFKTGAAEFLEKPVDDEVLIEAL-
>C380_22605_HK_Classic|Acidovorax_sp._KKS102|Pair_C380_22610|HisKA_245-305/C380_22610_RR_OmpR|Acidovorax_sp._KKS102|Pair_C380_22605|Response_reg_3-125	--RRLANEVAHELRTPLSSIALQASALAGTEEARAQALARIGQDALRAGHVLNQLLALARA---ILVVEDDAGIASGLRSNLQQRGY-AVDVSDGVASAWSALRAERFDAVLLDLGLVDGDGSELLRRLRLTPPATPVLIVTARDQVHQRIAGLDQGADDYLTKPFDVDELDARL-
>C380_22935_HK_Classic|Acidovorax_sp._KKS102|Pair_C380_22930|HisKA_250-310/C380_22930_RR_OmpR|Acidovorax_sp._KKS102|Pair_C380_22935|Response_reg_8-118	---LMLAGVSHDLRTPLTKLRLGVEIAGA--QVDAPLAASMARSIDEMDGIVGQFLQFARSGE-ILVADDEPDLRALLQRYLSDQGY-SVRTVEGAGPLDVLLQRERFDVLVLDVMMPGEDGLSICRRLRAQGETIPILMLTARGDPVDRIVGLEMGADDYLPKPFNPRELLARIQ
>C380_23080_HK_Classic|Acidovorax_sp._KKS102|Pair_C380_23075|HisKA_273-356/C380_23075_RR_NarL|Acidovorax_sp._KKS102|Pair_C380_23080|Response_reg_9-125	--GEMASLLSHELNQPLAAISSYANGSINL-EDVRMAMRQIARQAERAGRVIKSVHDFVRR---VYIVDDDASVREALAWLLRSRRL-PSESFDSAEAFDAMLQKRPPCCLLLDVRMPGMSGLALFDVLAARGATMPVIFLTGHADVPTAVDTVKRGAFDFCEKPFSDNALVDRIE
>C380_23350_HK_Classic|Acidovorax_sp._KKS102|Pair_C380_23345|HisKA_245-308/C380_23345_RR_OmpR|Acidovorax_sp._KKS102|Pair_C380_23350|Response_reg_3-114	-QKRFLADAAHQLKTPLAGLRMQADLAQRSTEELKRSLQQIGRSSIRATHTVNQLLALARAEG-ILIAEDDQVLADGLLRTLRASGA-VVDHVASGSEADAALTNNEFDLLILDLGLPKMHGLEVLKKLRGRGSALPVLILTAADSVEERVKGLDFGADDYMAKPFSLQELEARV-
>W5S_0129_HK_Classic|Pectobacterium_sp._SCC3193|Pair_W5S_0130|HisKA_238-299/W5S_0130_RR_OmpR|Pectobacterium_sp._SCC3193|Pair_W5S_0129|Response_reg_4-112	-QQRLLSDISHELRTPLTRLQLATALLRR-RQGEGNELNRIETETQRLDSMINDLLVLSRNQ--ILLVDDDKELTALLKELLEMEGF-NVVVAYDGEQALQIVDNT-IDLLLLDVMMPKKNGIDTLKELRQQH-QTPVIMLTARGSELDRVLGLELGADDYLPKPFNDRELVARIR
>W5S_0782_HK_Classic|Pectobacterium_sp._SCC3193|Pair_W5S_0781|HisKA_287-347/W5S_0781_RR_OmpR|Pectobacterium_sp._SCC3193|Pair_W5S_0782|Response_reg_9-118	-----SSHVAHELRTPLTHLQNRLFNLTELDNDIRDELNLAVDEVHKILGLFRTVMRIGEIESGVLVVDDDSVLCHWLGSKLHSHGH-SCRMVHDGAHALKAIKDEVYDVVLLDRMLPIMDGFTVLRELQGSR-HPPIMLLSALDRDVDRVMGLELGAEDYLGKPFNFNELRLRL-
>W5S_0902_HK_Classic|Pectobacterium_sp._SCC3193|Pair_W5S_0901|HisKA_236-298/W5S_0901_RR_OmpR|Pectobacterium_sp._SCC3193|Pair_W5S_0902|Response_reg_3-112	-REQLLHDVSHELRSPLARLQLAIGLVRQNSDNLENSLQRIEREALLMDKMIGELLTLSRTEH-ILLVDDDVELGDMLCEYLNAEGF-LTSRVLTGKEGIDGAMSGDYTAMILDVMLPDMSGIDVLRQIRKTE-QLPVIMLTARGDNIDRVIGLEMGADDYMPKPCYPRELVARL-
>W5S_1214_HK_Classic|Pectobacterium_sp._SCC3193|Pair_W5S_1213|HisKA_234-298/W5S_1213_RR_OmpR|Pectobacterium_sp._SCC3193|Pair_W5S_1214|Response_reg_13-122	SRRAFMADVSHELRTPLAVLRGELEALQDVRKPDAHSLHSLQSEVATLTKLVDDLHQLTLSD--ILIVEDEPKLGQLLVDYLQAADY-ATHWLPNGNDVIEWVRQHSPSLILLDLMLPGCDGLTICRTIRQFS-NVPIIMVTARSEEIDRLLGLEIGADDYICKPFSPREVVVRV-
>W5S_2095_HK_Classic|Pectobacterium_sp._SCC3193|Pair_W5S_2096|HisKA_270-329/W5S_2096_RR_OmpR|Pectobacterium_sp._SCC3193|Pair_W5S_2095|Response_reg_3-113	----TLTDLTHSLKTPLAVLQTTLRALRTKEITIEQAEPIMLAQISRISQQIGYYL--------ILVVEDNVLLLHHLTVQMNEMGH-QVDAASDAKEADYFLHENMPDIAIVDLGLPDEDGMSMIRRWRANQAKLPILVLTAREGWQDKVAVLEAGADDYVTKPFHMEEVVARL-
>W5S_2556_HK_Classic|Pectobacterium_sp._SCC3193|Pair_W5S_2555|HisKA_211-269/W5S_2555_RR_OmpR|Pectobacterium_sp._SCC3193|Pair_W5S_2556|Response_reg_7-113	SKKQLIDNIAHELRTPLVRLRYRLAMSDNLTEDEQQ---ALNRDIGQLEALIDELLTYARLDR-IVFIEDDTEVGKLIAAYLGKHDI-DVQVEARGDQAQAFIEQQQPDLVLLDIMLPGKDGMTICRELRPQY-SGPIVLLTSLDSDMNHILALEMGADDYILKTTPPAVLLARL-
>W5S_3297_HK_Classic|Pectobacterium_sp._SCC3193|Pair_W5S_3298|HisKA_203-268/W5S_3298_RR_OmpR|Pectobacterium_sp._SCC3193|Pair_W5S_3297|Response_reg_5-117	ARRNFFANVSHELRTPLTVLQGYLEMMQEDAALRGKALNTMQEQTRRMDGLVKQLLTLSRIEA-ILVVEDEAPIREMVCFVLEQNGY-QPVEAEDYDSAVTQLSEPFPELVLLDWMLPGGSGLQFIKHMKREARDIPVMMLTARGEEEDRVRGLEVGADDYITKPFSPKELVARIK
>W5S_4174_HK_Classic|Pectobacterium_sp._SCC3193|Pair_W5S_4173|HisKA_145-203/W5S_4173_RR_OmpR|Pectobacterium_sp._SCC3193|Pair_W5S_4174|Response_reg_3-113	--RQFTADVAHELRTPLAGIRLHLELHQQ---QHQIDCSSLIKRIDKMVKTVEQLLLLARVGQ--LIVEDDKLLQEGLLLALSHEGY-ACDCAGTAKEADALIGSAHYSLVILDLGLPDDDGLALLSRWRKNNYQHPVLILTARDKVDDRVSGLDVGADDYLAKPFALTELQARV-
>W5S_4718_HK_Classic|Pectobacterium_sp._SCC3193|Pair_W5S_4717|HisKA_238-302/W5S_4717_RR_OmpR|Pectobacterium_sp._SCC3193|Pair_W5S_4718|Response_reg_3-113	--RRFTSDAAHELRSPLAALKVQTEVAQLDEAMRRHALMNLDKGIDRATRLVDQLLTLSRLDA-ILLIEDDRLIGDGLKAGLTKLGF-TIDWFTEGKAGAAALKAAPYDAVVLDLSLPGMDGMDILRQWRQAGHDEPVLILTARDALEQRVEGLQQGADDYLCKPFALTEVAARL-
>HIB_15480_HK_Classic|Haemophilus_influenzae_10810|Pair_HIB_15490|HisKA_194-259/HIB_15490_RR_OmpR|Haemophilus_influenzae_10810|Pair_HIB_15480|Response_reg_5-116	SRQKFLSNINHELRTPLTVLQGYLEILADQNPLQKKAIFAMQEQSQRMEHLLQQFNFLAKIET-ILIVEDECAIREMITLFLSQKYY-DVIEASDFKTAINKIKEN-PKLILLDWMLPGRSGIQFIQYIKKQEAAIPIIMLTAKSTEEDCIACLNAGADDYITKPFSPQILLARI-
>HIB_18840_HK_Classic|Haemophilus_influenzae_10810|Pair_HIB_18850|HisKA_236-299/HIB_18850_RR_OmpR|Haemophilus_influenzae_10810|Pair_HIB_18840|Response_reg_3-113	--RRFTSDAAHELRSPLAALRIQTEVAQLDDVALREALLHLTQGIDRASQLIEQLLTLSKLDN-ILLIEDDNLIGNGLQIGLTKLGF-AVDWFTDGKTGMAALTSAPYDAVVLDLTLPKLDGLEVLQQWRSNHQDVPVLILTARDTLDERVKGLQSGADDYLCKPFALAEVAARL-
>CBU_0366_HK_Classic|Coxiella_burnetii_RSA_493|Pair_CBU_0367|HisKA_28-93/CBU_0367_RR_OmpR|Coxiella_burnetii_RSA_493|Pair_CBU_0366|Response_reg_21-132	-RSDFVANVSHELRTPLTVIRGYLETLLKDSKSYQKIFQQMYQHSARMETIIDDLLLLSRLES--LIIEDEIAIRDMVRFSLP-DEF-ELLDAEDTAKAIKQLAAQIPDLILLDWMLPGKSGIEFIEWIKQKEQDIPIVLLTAKAEEENKVRGLMSGADDYITKPFSPDELIARIR
>CBU_1228_HK_Classic|Coxiella_burnetii_RSA_493|Pair_CBU_1227|HisKA_255-315/CBU_1227_RR_OmpR|Coxiella_burnetii_RSA_493|Pair_CBU_1228|Response_reg_12-122	--KRFTADAAHELRTPLAALNTHTQVALRTPEERKEALLKVLAGVNRGTHVVQQLLTLNRM---VLLVEDDEFLGDGIRAGLKQYGH-TIDWVRDGQAAHDVLTHETFDIIILDLGLPKRSGLDVLKTIREKNDPTPVVILTARDTVDDRIKGLDAGSDDYMTKPFDLEELCARM-
>CBU_2005_HK_Classic|Coxiella_burnetii_RSA_493|Pair_CBU_2006|HisKA_218-273/CBU_2006_RR_OmpR|Coxiella_burnetii_RSA_493|Pair_CBU_2005|Response_reg_7-116	-RTQMLAAISHDLRTPITRMKLRAQFLDN-----STTRNALVKDLNEMEVMINETLSFARDD--ILIVDDDSDIRDLLGKFLRRHGF-EASLAKDGSEMQAILLKQAVDLVILDIMMPGDDGLTLCRQMRANS-TIPILMLTAISEEVDRILGLEMGADDYLSKPFNPRELLARVR
>SA40_0600_HK_Classic|Staphylococcus_aureus_subsp._aureus_SA40|Pair_SA40_0599|HisKA_129-177/SA40_0599_RR_OmpR|Staphylococcus_aureus_subsp._aureus_SA40|Pair_SA40_0600|Response_reg_3-112	--------FVHDIKTPVTAMKLLIDQ-----EENQERKQALLYEWSRINSMLDTQLYITRLES-ILLVEDDNTLFQELKKELEQWDF-NVAGIEDFGKVMDTFESFNPEIVILDVQLPKYDGFYWCRKMREVS-NVPILFLSSRDNPMDQVMSMELGADDYMQKPFYTNVLIAKL-
>SA40_1836_HK_Classic|Staphylococcus_aureus_subsp._aureus_SA40|Pair_SA40_1837|HisKA_655-720/SA40_1837_RR_OmpR|Staphylococcus_aureus_subsp._aureus_SA40|Pair_SA40_1836|Response_reg_5-114	--SNFLRSISHDIRTPLTTIMGNLDILVSSIIEKEQLLVHSFQESQYLYLLVTNILSLTKLQS-ILIIEDDHAITHLIDVALTLDYY-NVTTAENATQAHFKIQIDKPDVILLDLGLPDKDGLCLISEIRQHT-DIPIIVISARQEEQTIIQALDNGANDYMTKPFNVDELRARIR
>MGAS2096_Spy0878_HK_Classic|Streptococcus_pyogenes_MGAS315|Pair_MGAS2096_Spy0877|HisKA_234-295/MGAS2096_Spy0877_RR_OmpR|Streptococcus_pyogenes_MGAS315|Pair_MGAS2096_Spy0878|Response_reg_4-113	----QIAALSHDIKTPLTVLKGNLELLELLNKNQEGYIVSMNNSISVFEGYFNSLISYTR----ILAIDDDKEILKLMKTSLEIENY-HVITCQEIELPIVFDDFKGYDLILLDIMMPNISGTEFCYKIREEV-HSPIIFVSALDGDNEIVQALNIGGDDFIVKPFSLKQFVAKV-
>EC55989_3918_HK_Classic|Escherichia_coli_55989|Pair_EC55989_3917|HisKA_262-328/EC55989_3917_RR_OmpR|Escherichia_coli_55989|Pair_EC55989_3918|Response_reg_3-113	--ANFSADIAHEIRTPITNLVTQTEIALSTQRELEDVLYSSLEEYNRMTKMVSDMLFLAQADN-ILIVEDEIKTGEYLSKGLTEAGF-VVDHADNGLTGYHLAMTAEYDLVILDIMLPDVNGWDIIRMLRTAGKGMPVLLLTALGTIEHRVKGLELGADDYLVKPFAFAELLARVR
>Shew185_0052_HK_Classic|Shewanella_baltica_OS185|Pair_Shew185_0051|HisKA_128-195/Shew185_0051_RR_OmpR|Shewanella_baltica_OS185|Pair_Shew185_0052|Response_reg_5-114	------LSVSHDLRTPLSTIIGTLTTLKESASQKTELIDSAAAESHRLHQYIENLLQATKLQHGVLVVDDEPQIHTFMRISLEAEGF-EYISATSIATALKQYRSHQPHLIVLDLGLPDGDGIELLHALRQQD-KTPVLVLTARDQEEEKIRLLEAGANDYLSKPFGIRELIVRI-
>Shew185_0238_HK_Classic|Shewanella_baltica_OS185|Pair_Shew185_0239|HisKA_233-282/Shew185_0239_RR_OmpR|Shewanella_baltica_OS185|Pair_Shew185_0238|Response_reg_3-113	----ALGNLAHEMKRPLQGLQSYLESLQRGSKVLANLHHIIERELKR------------------LLIEDDTDLVARLIPALNKAGY-TVEHADNGIDGAFLGEEENFEAVILDLGLPGKPGLQVLGQWRQKGLAMPVLILTARDAWHERVDGLKAGADDYLGKPFHIEELLARL-
>Shew185_0253_HK_Classic|Shewanella_baltica_OS185|Pair_Shew185_0254|HisKA_245-302/Shew185_0254_RR_OmpR|Shewanella_baltica_OS185|Pair_Shew185_0253|Response_reg_4-113	-QQRLMGDISHELRTPLTRLQLSLALARK-KGQQTAETDRIGYEAEQLEKLISELLELSRV---ILLIDDDLGLSELLGQLLELEGF-QLTLAYDGKQGLDLALSSDYDLILLDVMLPKLNGFEVLRALRQHK-QTPVLMLTARGDEIDRVVGLEIGADDYLPKPFNDRELIARIR
>Shew185_0259_HK_Classic|Shewanella_baltica_OS185|Pair_Shew185_0258|HisKA_130-183/Shew185_0258_RR_NtrC|Shewanella_baltica_OS185|Pair_Shew185_0259|Response_reg_9-117	----LVRNLAHEIKNPLGGLRGAAQLLSRDDPALKEFTTLIIEQADRLRNLVDRLLGPQR----VWILDDDSSIRWVLEKALQGAKL-STASFAAAESLWQALEISQPHVIVSDIRMPGTDGLSLLERLQVHYPHIPVIIMTAHSDLDSAVSAYQAGAFEYLPKPFDIDEAISL--
>Shew185_0287_HK_Classic|Shewanella_baltica_OS185|Pair_Shew185_0286|HisKA_215-272/Shew185_0286_RR_OmpR|Shewanella_baltica_OS185|Pair_Shew185_0287|Response_reg_3-113	------DNIAHDLRTPLSHIRIGLEELASPSDEISEGCAILTEELDHCLATFDAMLSLTRIEEGILLVEDDATTIDYIVKGFLEQGH-NIETASDGHQGLSLATSSQYDLVILDRMLPQLDGLKLLAALRATGNQTPVLILSALAHVDERVKGLRAGGDDYMTKPFAFSELLVR--
>Shew185_0304_HK_Classic|Shewanella_baltica_OS185|Pair_Shew185_0305|HisKA_128-193/Shew185_0305_RR_OmpR|Shewanella_baltica_OS185|Pair_Shew185_0304|Response_reg_5-114	--KNLVNAVSHELRTPIARIEFNIEMLRNQDNNQLTQLDRIEFSLNELNSLVSEMLEHARFDS-ILIVEDDLPLAESIQEYLNYEGY-QVEIISNGVLAVSRILEWQPALVILDIMLPQKDGLSVCREVRSQY-NGYILMFTAREEEIDQIVGLEIGADDYLLKPVKPRMLLAKI-
>Shew185_0452_HK_Classic|Shewanella_baltica_OS185|Pair_Shew185_0451|HisKA_379-442/Shew185_0451_RR_NarL|Shewanella_baltica_OS185|Pair_Shew185_0452|Response_reg_9-117	--GEIGAGLAHELNQPIAAITQYSEGAMLDNPELYDVLGKINAQSIRAGAVVHRIRGL--------LVDDDEAILDSLGFMLGQFGY-QVQTFNSGRDFLAHCALSQAGCVILDSRMPEITGQEVQQKLLETHSPLGVIFLTGHGDLPMALSAFRKGACDFFQKPVSGKALVQAIE
>Shew185_0605_HK_Classic|Shewanella_baltica_OS185|Pair_Shew185_0604|HisKA_260-323/Shew185_0604_RR_OmpR|Shewanella_baltica_OS185|Pair_Shew185_0605|Response_reg_3-113	--SRFTADAAHELKTPLTVLRGKLEQASE--NPSQLDLNAILDEVGHLSAMTRKLLLLSQADSGVLLVEDEQKIADFICEGLRAKHF-NVTHCADGNQGYQAASNNTHDVIILDIMLPGRDGLDILRSLRQQGVDTPIILLTARNELGDRVQGLDMGADDYLAKPFYVEELHARIQ
>Shew185_1070_HK_Classic|Shewanella_baltica_OS185|Pair_Shew185_1071|HisKA_201-269/Shew185_1071_RR_OmpR|Shewanella_baltica_OS185|Pair_Shew185_1070|Response_reg_10-119	----LSNAVSHEIRTPLARLKFALALMPMS-DEQKRFLDEMQLDIKEMEDLLQELLNYASLES-VLLVEDDVRLANLIVDYLKSHGM-HVEVERRGDTVLTRLINYKPDIILLDIMLPGMDGLTLCEKLPDYF-AGPILLMSALGSSEDQIKGLELGADDYVVKPVDPALLVARIN
>Shew185_1365_HK_Classic|Shewanella_baltica_OS185|Pair_Shew185_1364|HisKA_205-270/Shew185_1364_RR_OmpR|Shewanella_baltica_OS185|Pair_Shew185_1365|Response_reg_5-117	MRKEFVANVSHELKTPLTVLQGYLEMMQSPDSMNVKPLALMQQQTRRMQSMVEQLLMLSRIED-ILIVEDELAIREMLTFVMEQHGF-TTSAAEDFDSAIALLKEPYPDLILLDWMFPGGSGIQLAKRLKQDERQIPIIMLTARGEEEDKVKGLEVGADDYITKPFSPKELVARIK
>Shew185_1826_HK_Classic|Shewanella_baltica_OS185|Pair_Shew185_1827|HisKA_499-562/Shew185_1827_RR_OmpR|Shewanella_baltica_OS185|Pair_Shew185_1826|Response_reg_4-115	--ENMSSRLSHELRTPVAVVRSSLEHLQTLDIDTQKYVDRAQEGVSRLSMILNNMSEATRLEQ-IAIVEDEAAIRENYKDVLQQHGY-SVQTYADRPSAMLAFNTRLPDLAIIDIGLGNDGGFMLCQSLRAMSSTLPIIFLTARDSDFDTVCGLRLGADDYLSKEVSFPHLTARL-
>Shew185_1921_HK_Classic|Shewanella_baltica_OS185|Pair_Shew185_1920|HisKA_252-315/Shew185_1920_RR_OmpR|Shewanella_baltica_OS185|Pair_Shew185_1921|Response_reg_3-113	--RRFSADAAHELKTPLSVIKLHQHGLESDDPQQKFHLAAIDAGVVHMSHTVEQLLVLARVDS-IMLVEDNELLAQGICLSLAKLGM-QVDHLNSYQQALQGVKNESFSAIVLDLGLPDGNGKDLLKAWRQQGVSIPTIVLTANTDFDTKLECLDMGADDYLGKPFDVRELAARIR
>Shew185_2827_HK_Classic|Shewanella_baltica_OS185|Pair_Shew185_2828|HisKA_380-444/Shew185_2828_RR_NtrC|Shewanella_baltica_OS185|Pair_Shew185_2827|Response_reg_12-122	--GSLSASINHELNQPLAALRSYAQNTQTQ-D---KNIKIIIELTDRLADIVGQFKSFTRKSQ-VLIIDDEPHIGTVLVQLFELEGI-KALATTEPKGIAKLLHKDWAGMVISDVNMPQLDGISLMQQIRLQDPDLPVVLLTGFGDIAMAVNALKQGAYDFLEKPFNNEHILDVV-
>Shew185_2939_HK_Classic|Shewanella_baltica_OS185|Pair_Shew185_2938|HisKA_136-201/Shew185_2938_RR_NtrC|Shewanella_baltica_OS185|Pair_Shew185_2939|Response_reg_6-115	ALGKMVATLAHQVRTPLSAALLYASNLASSDAAKAKFQQKLVDRLNELERQVNDMLLMAKG----LLVEDDASLREALLDTLMLAQY-ECIDVASGEDAILALKQHQFDLVISDVQMQGIGGLGLLNFLQQHHPKLPVLLMTAYATIGSAVDAIKLGAVDYLAKPFAPEVLLNQV-
>Shew185_3568_HK_Classic|Shewanella_baltica_OS185|Pair_Shew185_3569|HisKA_218-278/Shew185_3569_RR_OmpR|Shewanella_baltica_OS185|Pair_Shew185_3568|Response_reg_7-116	----LSRAVSHDLKTPIARLRFGIEALEEQSEQLRVYFQRLNRDLDTMEDLVMTLLSYARLDE-ILVVEDDISLAEWISDYLLDHGY-EVTVASQGDFALEMIAEEIPDLVLLDVMLPVKNGFDVCKEARAFY-AGPILFMTACVEDGDEIRGLDVGADDYLTKPIRPQVLLARIK
>Shew185_3733_HK_Classic|Shewanella_baltica_OS185|Pair_Shew185_3732|HisKA_407-468/Shew185_3732_RR_NarL|Shewanella_baltica_OS185|Pair_Shew185_3733|Response_reg_7-116	--GELGASLSHELNQPLAAIGHYCHGAEVSPEELQSVLTLIQQEVTRADSIISRLRNLLK----VYLIDDDDSVRRSLRFMLESYGL-KITDFDSAEAFFTTVDLTLPGCALVDVRMPGLSGPQLHLELVAKNSPLAVIYLTGHGDVPMAVEALKLGAVDFFQKPADGAKLAEAV-
>Shew185_3750_HK_Classic|Shewanella_baltica_OS185|Pair_Shew185_3749|HisKA_239-296/Shew185_3749_RR_OmpR|Shewanella_baltica_OS185|Pair_Shew185_3750|Response_reg_3-113	-----LGNLSHGLKTPLAVMQQQVEALKDTAIALQQQLDSIHKMVEAAARIT-------------LLVEDNPMLVTELEKQLKLAGY-VTDITDKALEADYLIKETQYDCVILDIGLPDGNGLELLEGWRNQGISTPVIMLTARSQWHEKVEGFNAGADDYLGKPFHAQELLARIQ
>Shew185_4195_HK_Classic|Shewanella_baltica_OS185|Pair_Shew185_4196|HisKA_233-284/Shew185_4196_RR_OmpR|Shewanella_baltica_OS185|Pair_Shew185_4195|Response_reg_3-113	---NFLRFASHELRTPVAICQSSFEILALQQGELTGATLYASQATGQMKSLIETLLWLT-----ILLVEDNRLLSNNIIQYLELSGI-ECDYAFNLAQADMLISQQQFDAIILDLNLPDGDGIEACERWKAQCITSPIIMLTARSSLNERLNGFAVGADDYLVKPFAMEELVARL-
>Shew185_4207_HK_Classic|Shewanella_baltica_OS185|Pair_Shew185_4206|HisKA_234-293/Shew185_4206_RR_OmpR|Shewanella_baltica_OS185|Pair_Shew185_4207|Response_reg_8-118	---LLMAGISHDLRTPLTRIRLASEMMV---EEDQYLKDGIVNDIEDMDAIISQFIAYIRQD--ILVVDDDMRLRALLERYLMEQGY-QVRSAANAEQMDRLLERENFHLLVLDLMLPGEDGLSICRRLRQQGNPIPIVMLTAKGDEVDRIIGLELGADDYLPKPFNPRELLARIK
>Shew185_4213_HK_Classic|Shewanella_baltica_OS185|Pair_Shew185_4212|HisKA_254-300/Shew185_4212_RR_OmpR|Shewanella_baltica_OS185|Pair_Shew185_4213|Response_reg_3-113	---NALADLAHSLKTPLAVIKSQADLSEASSEQVSVISRIIGHQLKR------------------LLVEDDLELQANLKQHLLDAHY-SIDVASDGEEGLFQALEYNYDAAIIDVGLPKLNGIALIRSVREQERDFPILILTARDSWQDKVEGLDAGADDYLTKPFHPQELVARL-
>Shew185_4315_HK_Classic|Shewanella_baltica_OS185|Pair_Shew185_4316|HisKA_472-535/Shew185_4316_RR_NtrC|Shewanella_baltica_OS185|Pair_Shew185_4315|Response_reg_17-127	ALGELTAGIAHEINNPTAVILGNMELLRYNAEVVKEEIDLVIQQVGRISTIIRSLLQYSRPG--VLIVDDEPGMRSFLNKALSKK-FALVETAGSIEDAEQLRSRCHFDLLIVDIRLPGRSGIEWHEALDEQGRRSDIIFMTGYADMEVAITALRAGASDFIMKPFHLEQMMTAV-
>KK9_0799_HK_Classic|Borrelia_garinii_BgVir|Pair_KK9_0798|HisKA_154-218/KK9_0798_RR_NtrC|Borrelia_garinii_BgVir|Pair_KK9_0799|Response_reg_4-114	---RHARNIAHEIKNPLGAIDINLQLLKKKNGKAENYFKVIKEEINRVDKIVTEFLL-------ILVADDEKNIREGIATYLEDEGY-FVFTASDGEEALETIENENLDVIISDLRMPQISGEKLLKIVKEKNLKIPFIILTAHGTVDSAVDAMREGAYDFLTKPLDLERLLLII-
>Desti_0206_HK_Classic|Desulfomonile_tiedjei_DSM_6799|Pair_Desti_0207|HisKA_886-953/Desti_0207_RR_CheY|Desulfomonile_tiedjei_DSM_6799|Pair_Desti_0206|Response_reg_10-131	-LEQFAYVASHDLQEPLRNVVSALQMIEKLDEESDTLIHYAVDSAKKMRSLIIDLLTYSRLN--ILLVEDNPIDVLMTRKALERWEINCVNIVRDGQEALDFLDSVKPDLVFLDLNLPKKNGKEVLFEISGDPSGTVKVVVTTSDILIDVQAWRELGADLCIVKPVDFDAYIEMI-
>Desti_0348_HK_Classic|Desulfomonile_tiedjei_DSM_6799|Pair_Desti_0349|HisKA_324-388/Desti_0349_RR_OmpR|Desulfomonile_tiedjei_DSM_6799|Pair_Desti_0348|Response_reg_4-113	AKSDFFSDISHELRTPLTSIKGATDILLRSSCESPEYLDIIKRNTDHLIKIVADFLEYSRIEAGILLVDDDPDILRILKDNLEFDNY-RVLLATNGKEALDLFDTSRVNLVILDLSLPDIDGIQVCRRMRDMS-SIPIIMLTARDRVPDKVLGLDSGADDYVSKPFDYLELAARI-
>Desti_0352_HK_Classic|Desulfomonile_tiedjei_DSM_6799|Pair_Desti_0351|HisKA_346-408/Desti_0351_RR_NtrC|Desulfomonile_tiedjei_DSM_6799|Pair_Desti_0352|Response_reg_5-115	---RIAAGMAHEIRNPLAALRGATELLSNVAANERKLLEIVLRESDRLNRLLGDFLLTVRA----IVVDDEPSMREFLEIMLSQDGY-EVRTAASGEEGLKLYKSEEPDLILTDVKMPGMSGLDLIKHIHSQDPAMPVIAVTAYASADDALRAVREGAYDYLSKPFQIEDLRIII-
>Desti_0492_HK_Classic|Desulfomonile_tiedjei_DSM_6799|Pair_Desti_0491|HisKA_286-358/Desti_0491_RR_NtrC|Desulfomonile_tiedjei_DSM_6799|Pair_Desti_0492|Response_reg_8-110	ALGKLAAAAVHDINNPIQGILTFSKLMKSQIDKFRMYLDLIAGESARCGDIMRSLLSFARLGT--MVVDDELIVRESLSAWLEQEGS-VVHKAESAEDALKLMEQSFYDILFVDIKMPGMGGFGLLEKVKELFPTTLVVIITAYGTVDHAVQALRLGANDFLIKPFDPEGL-----
>Desti_0711_HK_Classic|Desulfomonile_tiedjei_DSM_6799|Pair_Desti_0712|HisKA_255-322/Desti_0712_RR_NtrC|Desulfomonile_tiedjei_DSM_6799|Pair_Desti_0711|Response_reg_7-116	SLGTMLAGVAHEVNNPLSNISSACEILLEDKEFQRKFLKNILVQVEKARTLILNLLEFSRA---ILIVDDEEMALTNLEHVLKKQGY-HITTADTGPKGLNFIKTQTFDVVLTDLKMEKIDGMQILDECRQRHPCTEVVMITGYATVDSAIEAMKKGAYHYVSKPYRIDAVRKVV-
>Desti_0819_HK_Classic|Desulfomonile_tiedjei_DSM_6799|Pair_Desti_0820|HisKA_497-558/Desti_0820_RR_NtrC|Desulfomonile_tiedjei_DSM_6799|Pair_Desti_0819|Response_reg_6-115	SLGELSAGVAHEIRNPLAGIKTSMQVLKRGTDAERMLIDGVLDEINRLNTIVTDLLKFSR----ILIVDDERVLRQSLKIDLEEDGF-EVEILGSGEEAIERLDAIQPHLVLLDLRLPGMDGTQVLEAIRHEHEDLPVIIMTAYGDTQTTVEAIKRGADNFINKPFELHELKELI-
>Desti_0840_HK_Classic|Desulfomonile_tiedjei_DSM_6799|Pair_Desti_0839|HisKA_286-347/Desti_0839_RR_NtrC|Desulfomonile_tiedjei_DSM_6799|Pair_Desti_0840|Response_reg_5-115	-LAKFTASLAHEVNNPLTAIKMNVQMFSEPEKDRGKLLSTTLHEIEQIRRCITEMMNL------VCIIDDQNSILESMEIFFKIRNW-DVYTAANGPDGIRLVEQVRPVLVILDIRLPGMSGLEVLEKLRGRFPKLQVIVITAFQTMESTIQAIKLGAFDYLHKPIDIAEMDAVI-
>Desti_0909_HK_Classic|Desulfomonile_tiedjei_DSM_6799|Pair_Desti_0908|HisKA_317-377/Desti_0908_RR_NtrC|Desulfomonile_tiedjei_DSM_6799|Pair_Desti_0909|Response_reg_7-112	--GQLTASLSHEIRNPLSSINMNLQILSDLDGFDRRRLDITVKEVSRLENILRQLLDLSR----VLVIDDDASIRESLEMYLQDKGL-AVQTAETGNDGFKLCLDYNPQVVILDIRLPDVCGLDILRRIVETRPDAKVIMITAYHDMESSIEAMRYGAYDYIRKPLSVRELDRS--
>Desti_1321_HK_Classic|Desulfomonile_tiedjei_DSM_6799|Pair_Desti_1320|HisKA_125-181/Desti_1320_RR_NtrC|Desulfomonile_tiedjei_DSM_6799|Pair_Desti_1321|Response_reg_5-115	--EKMARKLSHEIRDPLAVIFAGLQLLETLNRGDVENLRFVLEAARSVVAVVNRF---------VLIVDDEIQLVRHLEHLLRTEGYEPIG-VHDGRSARKAVASYFPDVVLIDLKLPDVDGTRLLTELAEKHPSAGYIIITAFGSIKSAVEATRRGAREYLTKPFEPDELLLAV-
>Desti_1496_HK_Classic|Desulfomonile_tiedjei_DSM_6799|Pair_Desti_1495|HisKA_366-432/Desti_1495_RR_NtrC|Desulfomonile_tiedjei_DSM_6799|Pair_Desti_1496|Response_reg_8-117	ALGRLSAGVAHEIRNPLNSIRGFIQYFQKLDEEDYKYTDLMLTEVDRLNRVISKLLAYSKP---ILVVDDEPSQRKMLNANLSLEGY-QVFEADDGTSAIKRVSEEFFDLILMDNRMSSMDGIEALKEIKNISPGIPVIIITAYASVETAVEALQAGAHDYLTKPLDIEELKIKV-
>Desti_1653_HK_Classic|Desulfomonile_tiedjei_DSM_6799|Pair_Desti_1654|HisKA_268-328/Desti_1654_RR_NtrC|Desulfomonile_tiedjei_DSM_6799|Pair_Desti_1653|Response_reg_4-114	--GKLAAGVAHSVRNPLTSVKMRLFSMERLSPSQKEDFEVISEEIRHIDTIVGNFLEFSR----IVIVDDDAQLRHSFEKLLTSEGH-VVRTSATGETGLELIKAKLPDLVIMDVRLPGMDGLETFRAMHDIEPKLPVIIMTAYGSTDTAIEATKLGAYDYVLKPFEIPEMLNTI-
>Desti_1715_HK_Classic|Desulfomonile_tiedjei_DSM_6799|Pair_Desti_1714|HisKA_593-657/Desti_1714_RR_CheY|Desulfomonile_tiedjei_DSM_6799|Pair_Desti_1715|Response_reg_15-133	-LEQFAYIASHDLQEPLRNIVNCLQLIQKLGKTSNDLIGYAVDSAKKTNALIRDLLAYSRIS--ILVVEDNPVDIHMMRQAILEIKI-NLRVARHGEEALNYLEAVKPHLVILDLNLPRKNGREVLAEIRKVPSDIPVIVLTTSDAESDARISFELGASLFYRKPEDLDAFL----
>Desti_1743_HK_Classic|Desulfomonile_tiedjei_DSM_6799|Pair_Desti_1742|HisKA_281-343/Desti_1742_RR_NtrC|Desulfomonile_tiedjei_DSM_6799|Pair_Desti_1743|Response_reg_9-119	SLGQISTGIAHEINNPLGIILGYTQLLLRPRSQMHDDLKTIEKHTRNCKGIVEDLLKFSRS----LIVDDEEDMLRLLKRSLTDLNC-EIEAVPDAVSALTLLESSRFDVALADVRMPGMDGMEFLERTKTAHPELTVVMMTAYGSIDLAVQAIKQGAYDFITKPFEHDKLVHL--
>Desti_1866_HK_Classic|Desulfomonile_tiedjei_DSM_6799|Pair_Desti_1865|HisKA_381-448/Desti_1865_RR_NtrC|Desulfomonile_tiedjei_DSM_6799|Pair_Desti_1866|Response_reg_8-118	--RGVLSTVSHQLKTPLTSIRMAIHLLLEPNEKQADVLMSAEQEAERLHRILENLLDIGRIESGIIVVDDEINIRKVLSIGLEAKGH-KVVAVSNFQDAVNENLRRSFDIAFLDLRLGTADGLDLIPVLLASTPWLKIIVITAYSSVSSAVEAMRRGAIDYIPKPFTPAQIHHAVE
>Desti_2039_HK_Classic|Desulfomonile_tiedjei_DSM_6799|Pair_Desti_2038|HisKA_413-474/Desti_2038_RR_unclassified|Desulfomonile_tiedjei_DSM_6799|Pair_Desti_2039|Response_reg_5-114	-LAELASGIAHQIRNPLNNLVYALHLLRQEEGEKKDLIQNITERVELINRMINEFIQYTRT----LIVDDDINSAKTLARILGSEGY-TTDYVASAEEALTLLGEIDYDLLIIDMILPGMDGLDFLKRAVEINPETLSVVITAYGSIGTAVDALKSGASDFLEKPVVPEKLLL---
>Desti_3158_HK_Classic|Desulfomonile_tiedjei_DSM_6799|Pair_Desti_3157|HisKA_700-761/Desti_3157_RR_CheY|Desulfomonile_tiedjei_DSM_6799|Pair_Desti_3158|Response_reg_24-134	--GQLTAIVSHELRNPLGVIQSSAYVLSRTDEKTQKHLERIEQQVGICDSIIGELLEYTRG---ILVVDDDVGFCDNLQDILEGEGY-EVFVASTSAEASKIARDTRPWLALVDLKLPDGSGTALLSDLKQVKSDCVCILMTAYADVDSAVAALEKGVFYYLQKPIRPAELIELV-
>Desti_3533_HK_Classic|Desulfomonile_tiedjei_DSM_6799|Pair_Desti_3534|HisKA_291-345/Desti_3534_RR_OmpR|Desulfomonile_tiedjei_DSM_6799|Pair_Desti_3533|Response_reg_6-115	-RKQWTSDVAHELRTPLAILRGEIEAMQDVREISPERLISLHDETNRIGKLVDDL---------VLIVEDESKIAELLRDYLIAAGF-VVTIVGRGDLAAGEVRKTSPALVLLDIMLPGMDGMDVCREIRRFS-TVPIIMLTARVEEIDRVIGLELGADDYVCKPFSPREIVARVK
>Desti_3586_HK_Classic|Desulfomonile_tiedjei_DSM_6799|Pair_Desti_3585|HisKA_256-323/Desti_3585_RR_NtrC|Desulfomonile_tiedjei_DSM_6799|Pair_Desti_3586|Response_reg_4-105	-IGQMVATIAHEIRNPLGIVKSSAEMLKKDPARVRKLSGVIVEEATRLSNILTDFLDFARPR--VLIVDDEKNYLIVLEDLLMDEGY-DVLTASSGAKAIEIIANSPVDTVLSDIKMPGMTGIELLERISALDPDLPVILMTAFAEVDQAVDAMKKGALDHIQKPFDNRDVKRAV-
>Desti_4339_HK_Classic|Desulfomonile_tiedjei_DSM_6799|Pair_Desti_4340|HisKA_323-393/Desti_4340_RR_CheY|Desulfomonile_tiedjei_DSM_6799|Pair_Desti_4339|Response_reg_6-112	ALGKMAAGIAHEINNPLAIIAEKAGWMKDEEEELSQHFKDLQDCVIKIRDQVER----------ILLVDDEVDFRYTLAERLRYRGF-IVCEAGDEKEAFDQIHICMPQLIVLDIVLPGASGYQILKRIKAELPNLPVIVLTGLGT---SPGGVELGAFDYLLKPVDLDLLLERI-
>Desti_4782_HK_Classic|Desulfomonile_tiedjei_DSM_6799|Pair_Desti_4781|HisKA_440-502/Desti_4781_RR_NtrC|Desulfomonile_tiedjei_DSM_6799|Pair_Desti_4782|Response_reg_13-119	SLGQLVAGVAHELNNPLGLILFYVELLKNPTSEHRTDVEVIERHAETCRSVVQDLLAFSR-----LIVDDEPDFLRGLARSIPKEISCRVLTARRAADALSLMETNPVELVLTDIRMPDMNGIELLDEIKSRDPWVTVVIMTAYGSIDIAVDAIRKGAYDFVQKPFKPDEINRI--
>Desti_4909_HK_Classic|Desulfomonile_tiedjei_DSM_6799|Pair_Desti_4908|HisKA_297-358/Desti_4908_RR_NtrC|Desulfomonile_tiedjei_DSM_6799|Pair_Desti_4909|Response_reg_7-112	-LGHLSASLSHEIRNPLSSIKMNLQILSRLDGYDQRRLEITVHEVSRLENILRQLLDLAR----ILIIDDETAIQESLEMFLREKGL-AVCVAGTGSEGLEQYLVFQPQVIVLDIRLPDISGLEVLKQIMAVDADAKVIMITAYHDMETTIEAMRNGAYDYIHKPLDVDELDYAV-
>Desti_4940_HK_Classic|Desulfomonile_tiedjei_DSM_6799|Pair_Desti_4941|HisKA_276-338/Desti_4941_RR_CheY|Desulfomonile_tiedjei_DSM_6799|Pair_Desti_4940|Response_reg_9-111	-LGVMAGGIAHEVRNPLAICYSAAQFLNEESEFHAECVERILANIQKASVIIENLLRFARP----LIVDDEPDMCWLLEHLLKREAY-SVMKASSGREAMKLMETHKFCLAFVDLKLHDIEGLELARCFKRVDPSLRIIMVSCYKDDPTVQEALSEGICDFIPKPFLHADIVRSI-
>Desti_5066_HK_Classic|Desulfomonile_tiedjei_DSM_6799|Pair_Desti_5065|HisKA_364-428/Desti_5065_RR_OmpR|Desulfomonile_tiedjei_DSM_6799|Pair_Desti_5066|Response_reg_6-118	-RRDFVANVSHELKTPITSIKGFLETLREDRENAERFMDIMLKHTNRLDAIIDDLLSLSRIE--VLVVDDEEDILELVRYNLSKDGY-QVTSALSGETALKKAKEESPDLVLLDLMLPGVDGLDVCKELKRDPAAIPIVMLTAKGEDADVVTGLELGADDYITKPFSPRVLLARIK
>Desti_5335_HK_Classic|Desulfomonile_tiedjei_DSM_6799|Pair_Desti_5336|HisKA_536-602/Desti_5336_RR_CheY|Desulfomonile_tiedjei_DSM_6799|Pair_Desti_5335|Response_reg_5-126	--GQTVAGLAHGIKNILTGLEGGVFVVETDDELLPRGWSMVRNNISRVSALVKDLLSYSKERA-ILVIDDEPDILTFIGTLLRKNGY-TVCEACDGVEGMKKVIEEKPDLVCLDLLMPEKTGIKMYREMRRDEKHLPVIMVTGIEADQYIQERSLPAPEGYIEKPIDRELFLKAV-
>ACIAD0626_HK_Classic|Acinetobacter_sp._ADP1|Pair_ACIAD0627|HisKA_339-403/ACIAD0627_RR_OmpR|Acinetobacter_sp._ADP1|Pair_ACIAD0626|Response_reg_4-113	SRRQWVADTSHELKTPLSVLQAQIEAMQDIRKATPEHLAAMMSQISSLKKLTQDLADLAQADA-VMLVEDEVELAHLVRDYLEASGF-EVSMFHDGQEAYESFLQRKPNLMILDLMVPRMDGLTICRKVREQS-DLPIIMVTARTEEIDRVLGLNMGADDYVCKPFSPKELVARVQ
>ACIAD0727_HK_Classic|Acinetobacter_sp._ADP1|Pair_ACIAD0726|HisKA_314-379/ACIAD0726_RR_OmpR|Acinetobacter_sp._ADP1|Pair_ACIAD0727|Response_reg_10-119	-QRELMRAVSHELRTPVARIRFGMEMLAEY-NYRIQQMEMIDRDIEALNTLIDEIMTYAKLEQGILIVEDDERLARLTQEYLIRNGL-EVGVETDGNRAIRRIISEQPDLVVLDVMLPGADGLTVCREVRPHY-HQPILMLTARTEDMDQVLGLEMGADDYVAKPVQPRVLLARIR
>ACIAD1369_HK_Classic|Acinetobacter_sp._ADP1|Pair_ACIAD1368|HisKA_139-194/ACIAD1368_RR_NtrC|Acinetobacter_sp._ADP1|Pair_ACIAD1369|Response_reg_8-116	--RQLIRGVAHEIKNPLGGIRGATQLLARNDPKYAEFTDIIINEVDRLRNLADTML--------IWVIDDDRAMRWVLEKTFKEEGF-DVTSFEEAQSALDQLLDDAPDVILTDIRMPGIDGLTFLGKVKNNYPDLPVIIMTAHSDLESAVSSYQTGAFEYLPKPFDIDEALALV-
>ACIAD1421_HK_Classic|Acinetobacter_sp._ADP1|Pair_ACIAD1422|HisKA_210-274/ACIAD1422_RR_OmpR|Acinetobacter_sp._ADP1|Pair_ACIAD1421|Response_reg_4-116	--QVFIANAAHELRTPLTALKLQTSLLLKDSQIYDENLSDLSLSLKRMTHLVDQLMSLAH----ILYIEDDVMIGKTTYQLLRHEKF-EVDWAKTGLEALDFLFRQTYHLVLLDLGLPELEGLDVLKHIRKKINKIAVIIISARDQSRDKIQGLKLGADDYIVKPYDFDELVARIE
>ACIAD2238_HK_Classic|Acinetobacter_sp._ADP1|Pair_ACIAD2239|HisKA_223-287/ACIAD2239_RR_OmpR|Acinetobacter_sp._ADP1|Pair_ACIAD2238|Response_reg_3-113	-EQRFTADASHELRSPLSAIQMRLELIKRDIDSLNADIDNIQIDVKRSTQILENLLLLARLD--ILIAEDDISQAESIKSWLELDGY-VVDWVDRGDYAIAAIKQHDYDCILLDRGLPKSSGDQVLLTLRKHQSMTPVIMITARDSISDRVTGLDLGANDYLVKPFSLEELSARIR
>ACIAD2960_HK_Classic|Acinetobacter_sp._ADP1|Pair_ACIAD2961|HisKA_220-280/ACIAD2961_RR_OmpR|Acinetobacter_sp._ADP1|Pair_ACIAD2960|Response_reg_4-113	-QKQFVADAAHELRTPITALNLQTKILLSQ-FPDHAALQNLGKGLARIQHLVTQLLALAKQD--ILIIEDDFMIAESTITLLKYHQF-EVEWVNNGFDGLAHLAKQSFDLVLLDLGLPMMDGMQVLKQIRQKT-GVPVLIISARDQLENRVEGLNQGADDYLIKPYEFDELLARIN
>ACIAD2975_HK_Classic|Acinetobacter_sp._ADP1|Pair_ACIAD2973|HisKA_657-724/ACIAD2973_RR_OmpR|Acinetobacter_sp._ADP1|Pair_ACIAD2975|Response_reg_11-120	-RSALLSSVSHDLRSPLAAMIGSADTLKYSDTDR-DLLDTIHIEGERLDRYIQNLLDMTRLGH-ILIIDDEPQIRKFLDIALRAQGY-AVHVAETGMKGLEILASQGADLLILDLGLPDMDGAEVLKEMRQWS-QIPVIVLSARPDEQQKIKLLDAGANDYVTKPFSIQELCARIR
>ACIAD3389_HK_Classic|Acinetobacter_sp._ADP1|Pair_ACIAD3388|HisKA_261-314/ACIAD3388_RR_OmpR|Acinetobacter_sp._ADP1|Pair_ACIAD3389|Response_reg_23-133	--QIMLAGISHDLRTPLTRIRLTAEMLPDL----RE---GLVYDVDDMDAILNQFI--------ILVVDDDVRLRTLLQRFLEDKGF-VVKTAHDATQMDRLLQRELFSLIVLDFMLPVEDGLSICRRLRQSNIDTPIIMLTARGSDSDRIAGLEAGADDYLPKPFNPNELLARIR
>ACIAD3558_HK_Classic|Acinetobacter_sp._ADP1|Pair_ACIAD3557|HisKA_226-292/ACIAD3557_RR_OmpR|Acinetobacter_sp._ADP1|Pair_ACIAD3558|Response_reg_6-119	MRKDFVDNISHELRTPLTVLSGYIETFTDLNPRWKRAFDQMQSQTKRMNALVNDLLLLSNLEN-ILIVDDELPIREMIHTSLDMAGF-QCLQAEDAKQAHQMIVDQRPALILLDWMLPGVSGVDLCRRLKRDESEIPVIMLTARGEEDHKVQGLDAGADDYMTKPFSTRELVSRIK
>TtJL18_0453_HK_Classic|Thermus_thermophilus_JL-18|Pair_TtJL18_0452|HisKA_233-291/TtJL18_0452_RR_OmpR|Thermus_thermophilus_JL-18|Pair_TtJL18_0453|Response_reg_3-110	--RRFARHASHELRTPLTALKGYLEVLRR--KDEPRALEGALREAGRMEALLAGLLRLSRLEA-VLLVEDDPGVREALELGLSLEGH-EVRAVDRPKEALGLLS--WAEVVVLDVLLPQGDGFSLLRAIRERS-EVPVLMLTALDGVEWRVKGLREGADDYLVKPYSLQELLARL-
>TtJL18_0541_HK_Classic|Thermus_thermophilus_JL-18|Pair_TtJL18_0542|HisKA_246-311/TtJL18_0542_RR_OmpR|Thermus_thermophilus_JL-18|Pair_TtJL18_0541|Response_reg_9-118	-QTRFLQDASHELRTPITAILGHVGYLLRLTEAQRESLEVVKREAERMGKLVSDLLDLSQSG--ILIVEDEKDIARFIELELQAEGY-RTEVAHDGITGLSKFREVSPNLVILDLMLPVMDGIEVAKRIRKTS-NVPILILTAKDRVEDKVEGLDAGADDYLVKPFSIEELLARVR
>TtJL18_0686_HK_Classic|Thermus_thermophilus_JL-18|Pair_TtJL18_0687|HisKA_216-274/TtJL18_0687_RR_OmpR|Thermus_thermophilus_JL-18|Pair_TtJL18_0686|Response_reg_4-113	--RAFLAEASHELRTPLTVLLGHLDRLAR-NPMDLEALRTARATAERMRRLVEDLLALARGE--ILLIEDDPEVARLVEAELNEAGF-QVDWAKTGMEGLIRHREGKPDLVVLDLGLPDLDGAEVARRIRATD-DTPILVLTAQDAVDRKVSLLTGGADDYLVKPFHPAELLARIQ
>TtJL18_0914_HK_Classic|Thermus_thermophilus_JL-18|Pair_TtJL18_0915|HisKA_736-800/TtJL18_0915_RR_CheY|Thermus_thermophilus_JL-18|Pair_TtJL18_0914|Response_reg_4-112	-KGEFLAAVSHELRTPLAAILGLAELLRQLPPEAQESVELILESAFRLKNMVDNLLDTSRLEAGILVIEDEPLVGHMLRRFLERAGH-EVVWAPNGEAGLGRLAEG-FDLVVCDLIMPGIPGEEVIRRIREEA-GPPVLAVSASVSQESQRRALEAGAQAFLGKPFEAQAFLRV--
>TtJL18_1044_HK_Classic|Thermus_thermophilus_JL-18|Pair_TtJL18_1045|HisKA_200-257/TtJL18_1045_RR_OmpR|Thermus_thermophilus_JL-18|Pair_TtJL18_1044|Response_reg_24-136	--KRFTRDAAHELRTPVAAALAQLEAAEAY-LSEGEALQATKEELLRMKRLVEALLVLAREG--VLLLEDEPRLGQAVARALAAQGY-GVRWARSLGEAREAFLELEPDLMVLDVRLPEDGGFRFAEEAREAGYKGPILFLTARDALEDRVQGLDLGGDDYLVKPFHLEELLARVR
>TtJL18_1233_HK_Classic|Thermus_thermophilus_JL-18|Pair_TtJL18_1234|HisKA_614-678/TtJL18_1234_RR_CheY|Thermus_thermophilus_JL-18|Pair_TtJL18_1233|Response_reg_4-114	-KDEFLATVSHELKTPLTAVRALAEILQEGKEERRRFTALLAQEAARLSRLVEEILAYTRLEA-VLIVDDEESILVPLEFLFRKAGH-RVELARTGEEALSRLAERPYALVVLDLMLPGVDGFQVLEALKARTPAPRVLVLTARGREADRAKALALGADAFLAKPFGVQDLMAE--
>TtJL18_1856_HK_Classic|Thermus_thermophilus_JL-18|Pair_TtJL18_1857|HisKA_107-153/TtJL18_1857_RR_OmpR|Thermus_thermophilus_JL-18|Pair_TtJL18_1856|Response_reg_4-113	-------LLAHEFRTPLAGMAVLLRALAPKDPREAQVLDLLKKEVARLTRLVESLLRPGRRE---LLVEDEPSLRLGLRLALEGAGH-RVLEAATAREAWPLLREA--ELVVLDWMLPDEPGVRLLDRMRQGPESLPVLMLTARAGVRDRVEGLSRGADDYLVKPFAVEELLARL-
>RB2501_08410_HK_Classic|Robiginitalea_biformata_HTCC2501|Pair_RB2501_08405|HisKA_123-187/RB2501_08405_RR_OmpR|Robiginitalea_biformata_HTCC2501|Pair_RB2501_08410|Response_reg_8-120	-RKEFLGNVSHELKTPLFTVQGYIHTLLDDKKVRRKYLNRAAKGVERLIYIIKDLDLITKLE--ILLVDDEPDILEILSYNLTSEGY-QVYTARNGAEGVEKARKKNPHLIILDVMMPEMDGIEACEIIRKTKQDSIIAFLTARNEDYSQVAGFDAGADDYITKPIKPKVFISKV-
>RB2501_10837_HK_Classic|Robiginitalea_biformata_HTCC2501|Pair_RB2501_10832|HisKA_150-209/RB2501_10832_RR_NtrC|Robiginitalea_biformata_HTCC2501|Pair_RB2501_10837|Response_reg_8-118	-LGEITAGIAHELNTPLANILGFAELIQETDPKTIEDLDRIIENAIFSREVVKKL---------ILMVDDDVGILELLQRHLQSLGY-HTFKALSVKEALFILKDSPIDLLITDIQMPEVDGLQLVRYAEEHYPGMPKLVITGYPSVAGAQETFRSGAADYLTKPFTREELKQAVR
>RB2501_15984_HK_Classic|Robiginitalea_biformata_HTCC2501|Pair_RB2501_15979|HisKA_290-355/RB2501_15979_RR_OmpR|Robiginitalea_biformata_HTCC2501|Pair_RB2501_15984|Response_reg_8-118	-KSDFINNMTHEFKTPIATINLAVEAIKNDREKVNRYLQMIRDENKRMHAQVENVLRISKLE--ILLVEDDPNFGIVLKDYLSMNDF-DVTLAKNGMEGFEKFKKEPFDVCILDVMMPYKDGFTLAKEIREKNDHIPIIFLTAKTMKEDVLKGYKAGADDYLNKPFDSEVLLVKL-
>RB2501_02365_HK_Classic|Robiginitalea_biformata_HTCC2501|Pair_RB2501_02360|HisKA_192-251/RB2501_02360_RR_OmpR|Robiginitalea_biformata_HTCC2501|Pair_RB2501_02365|Response_reg_8-118	---EFINNLTHELRTPVFSISLAAKILRELPEEEKPLADTILQQTARVSGHIDQVLELGNLE---LLVEDDTSLGYLLTEYLGMKGF-DLRWIQAPSEVMPLLEQRAFDLVILDVMMPGTDGFTLGRQIHDRFPGLPFIFLTARSMKIDVLKGFSVGAVDYLKKPIDEEELVVRI-
>RB2501_02825_HK_Classic|Robiginitalea_biformata_HTCC2501|Pair_RB2501_02820|HisKA_235-297/RB2501_02820_RR_OmpR|Robiginitalea_biformata_HTCC2501|Pair_RB2501_02825|Response_reg_5-115	-QSRFINNASHELRNPLTAILGLTEVGQADAASYRELLRDIEREAQRLDHLVDGLLQLAQT---ILLIEDEYAIASFVTQGLQESGY-AVAVCYDGEKGLEMLQDGDFDLVILDIVLPGMDGREVARTIRGQGLDLPILMLTALGSTENVVRGLDSGADDYLVKPFKFKELEARV-
>OA238_c02290_HK_Classic|Octadecabacter_arcticus_238|Pair_OA238_c02280|HisKA_352-415/OA238_c02280_RR_OmpR|Octadecabacter_arcticus_238|Pair_OA238_c02290|Response_reg_4-113	--EQFAADVAHEIKNPLASLRSAVGTLRKTREDHREMLEVIEHDVQRLDRLVSDISNASRLDS-IALVDDDRNILTSVQITLEAEGF-EVETCADGQQALDAFTKRMPELAVLDIKMPRMDGMDLLQRLRQKT-SMPVIFLTSKDDEIDEVLGLRMGADDYVKKPFSQRLLVERIR
>OA238_c12790_HK_Classic|Octadecabacter_arcticus_238|Pair_OA238_c12800|HisKA_362-426/OA238_c12800_RR_NtrC|Octadecabacter_arcticus_238|Pair_OA238_c12790|Response_reg_7-117	ALGEMSAAVSHELNQPLAAMKTYLAGARLRPDEAVVAVQRIDGLIERMAAITKQLKSYARKG--IAIVDDEQDMRQSISQWLALSGY-DTETFASAEDALKGVGQDYPGIVVSDIKMPGMDGMQFLKKLKGVDSSLPVIMITGHGDVPMAVEAMRIGAFDFLEKPFNPDRMTEL--
>OA238_c12910_HK_Classic|Octadecabacter_arcticus_238|Pair_OA238_c12920|HisKA_365-433/OA238_c12920_RR_PrrA|Octadecabacter_arcticus_238|Pair_OA238_c12910|Response_reg_5-114	ALGQMSAGISHELNQPLMAIRSYAENAESNTDIAGQNLGRIADLARRMGRIIRNLRSFAKQES-VLIVDDERDLREAVGQTIELADL-VPVRAGSFVEAKDHITASFDGVIVTDIRMPGRDGFHLLDYVRKVDPDLPVILLTGEGDIPMAVKAMSDGAFAFLEKPCGAKELLAVV-
>OA238_c16790_HK_Classic|Octadecabacter_arcticus_238|Pair_OA238_c16780|HisKA_242-298/OA238_c16780_RR_OmpR|Octadecabacter_arcticus_238|Pair_OA238_c16790|Response_reg_4-111	--EEFIAEAAHRVRTPLATVRSYAEALQRNRNALRAMVRAIDESSRAAGQLLD------------LLVEDNHELAKAVCSRIGLDGH-TVDHAAKIEDAIAFVQAGEYDLILLDIMLPDGDGRSFLKQHRAGKNDTPVIILTARSEVSDRISLLDLGADDYVTKPFDHAELQAR--
>OA238_c24980_HK_Classic|Octadecabacter_arcticus_238|Pair_OA238_c24990|HisKA_669-735/OA238_c24990_RR_CheY|Octadecabacter_arcticus_238|Pair_OA238_c24980|Response_reg_5-117	-KDAFLSQISHELRTPMTSIRSFSDILRNEDGARKRFAGIIHEESNRLTRLLDDLLDLGVLESGVLLIEDEPNIIEAISYILTKDGW-TVHTHSNGETAMAKVMQGVPDLIILDVMLPGRSGYDILRDLRAQAKDVPVMMLTARGQAKDREMAASLGATRFMTKPFSNAEVLESV-
>OA238_c40170_HK_Classic|Octadecabacter_arcticus_238|Pair_OA238_c40180|HisKA_244-301/OA238_c40180_RR_OmpR|Octadecabacter_arcticus_238|Pair_OA238_c40170|Response_reg_6-115	----VLSGVSHDLGTPATRLRLRAALIKD--PNLRQKFE---TDIDSMAGIIESVLTY------ILVVDDDVEMRAMMTQFLQQNGS-IALPAANEAEVRRHIDGGRVDLVLLDVMLGDENGLEICKHLRREQ-DVPIIMVSALSADHQRMEGYAVGADDYIAKPFNPELLLARV-
>Shew_0080_HK_Classic|Shewanella_loihica_PV-4|Pair_Shew_0081|HisKA_213-276/Shew_0081_RR_OmpR|Shewanella_loihica_PV-4|Pair_Shew_0080|Response_reg_19-128	--KNLTNAIAHESRTPIFRIQCNLDMLDDVRPEQMQYLEGIQEDLNELGGMIEELLHFAKLER-VVLVEDDEKISQLLSSYLTMQQI-ETVCVHDGADAVATILAEQPDLVILDLMLPNLDGFSICRQLQPVF-DGKILFLTASEDDMDQVAALEMGADDFIIKPIQPRVLLARIR
>Shew_0098_HK_Classic|Shewanella_loihica_PV-4|Pair_Shew_0097|HisKA_215-272/Shew_0097_RR_OmpR|Shewanella_loihica_PV-4|Pair_Shew_0098|Response_reg_3-113	------DNIAHDLRTPLSHLRIGLEQLQRPAEELDEASAILIEELDHCLATFDAMLSLTRIEEGILLVEDDATTTEYVVKGFAEQGH-NIETASDGHQGLLLATSMQYDLVILDRMLPQLDGLKLLAALRATGNQTPVLILSALSHVDERVKGLRAGGDDYMTKPFAFSELLVR--
>Shew_0582_HK_Classic|Shewanella_loihica_PV-4|Pair_Shew_0583|HisKA_239-291/Shew_0583_RR_OmpR|Shewanella_loihica_PV-4|Pair_Shew_0582|Response_reg_3-112	-----LGNLSHGLKTPLAVMQQQVEVLGL---KDPEAASAMQSQLDQIHKMIERKLAAARIT---LLVEDNTLLVDELAKQLKQAGY-VTDVTDRAAEADYLIKETHYDCVILDIGLPDGNGLQLLETWRNQGIDTPVIMLTARSQWHEKVEGFNAGADDYLGKPFHSQELLARI-
>Shew_0610_HK_Classic|Shewanella_loihica_PV-4|Pair_Shew_0609|HisKA_396-452/Shew_0609_RR_NarL|Shewanella_loihica_PV-4|Pair_Shew_0610|Response_reg_13-121	--GEIGSGLAHELNQPIAAITQYSEGGMMADSDLYELLAKINAQSARAGAVVHRIRGL--------LVDDDEAVLDSLSFMLRQFGY-EMTTFVSGLRFLEEVDLSRPGCVILDSRMPAISGQALQQELLTKQSPLGIIFLTGHGDLPMAVNAFRQGACDFFQKPVSGQALAAAI-
>Shew_0803_HK_Classic|Shewanella_loihica_PV-4|Pair_Shew_0804|HisKA_199-259/Shew_0804_RR_OmpR|Shewanella_loihica_PV-4|Pair_Shew_0803|Response_reg_6-115	--KELSRTISHEVRTPLARMRFALQLSKA--ELDEKYWQRLNADIDEIEQLANNYLSFAKLEH-ILLIEDDLDLAELTLLYLTQQGF-DLTHSESAQAVANLPADLRFDLIICDIMLPDSDGFSLFAELQARY-QCVIIFMTALDGQQEQIKGLELGASDYIVKPVNPELLVARIK
>Shew_0895_HK_Classic|Shewanella_loihica_PV-4|Pair_Shew_0896|HisKA_202-270/Shew_0896_RR_OmpR|Shewanella_loihica_PV-4|Pair_Shew_0895|Response_reg_10-119	----LSNAVSHEIRTPLARLKFALALVPQDPAQRQAFLDEMQQDVKEMETLLQELLTYASLES-VLLVEDDIRLANLIVDYLKSHGM-HVEVERRGDTVLTRLINYKPDIILLDIMLPGMDGLTLCEKLPDYF-AGPILLMSALGSNEDQIKGLELGADDYVVKPVDPALLIARIN
>Shew_1363_HK_Classic|Shewanella_loihica_PV-4|Pair_Shew_1364|HisKA_140-206/Shew_1364_RR_NtrC|Shewanella_loihica_PV-4|Pair_Shew_1363|Response_reg_6-115	ALGKMVASLAHQVRTPLSAALLYAANLGSTQVSRERFQGKLIDRLNELSQQVDDMLLMAKGR--ILLVEDDAALREALVDTLLLAQY-ECVDVESAEAAIVALKGQEFDMVISDVQMEGIGGLGLVNYLQQHNAQVPILLMTAFATIDSAVSAIKLGAVDYLAKPFAPEVLLNQV-
>Shew_1443_HK_Classic|Shewanella_loihica_PV-4|Pair_Shew_1442|HisKA_392-456/Shew_1442_RR_NtrC|Shewanella_loihica_PV-4|Pair_Shew_1443|Response_reg_11-121	--GSLSASINHEINQPLAAIRSYAQNTQTKWDDVSSNIMTIIELTDRLAAIVSQFKSFTRKSQ-ILIVDDEPLIGSALVQLFELESY-RALALTDAKQIGLGLPDNWPGIVISDVNMPDIDGLSLMRTLLAQDKDIPIILLTGHGDIAMAVQALKQGAYDFIEKPFNNEHMLDI--
>Shew_1790_HK_Classic|Shewanella_loihica_PV-4|Pair_Shew_1791|HisKA_499-562/Shew_1791_RR_OmpR|Shewanella_loihica_PV-4|Pair_Shew_1790|Response_reg_4-115	---NMSSRLGHELRTPVAVVRSSLEHLQDLPPQHQKYVDRAHEGVSRLNMILNNMSEATRLEE-IAIVEDEAAIRENYKEVLQQQGY-FVQAYANRPSAMEAFNTRLPDLAIIDIGLEDDGGFTLCQSLRAMSNTLPIIFLTARDSDFDTVCGLRLGADDYLSKDVSFPHLIARL-
>Shew_1970_HK_Classic|Shewanella_loihica_PV-4|Pair_Shew_1969|HisKA_341-400/Shew_1969_RR_NarL|Shewanella_loihica_PV-4|Pair_Shew_1970|Response_reg_6-111	--GEMASGIAHELNQPLAGIRYLAQGSYRQQTELQHALSKILQQVDRAQNTIKRFRQF--------LVDDDQDVLDSLKWMLEGMGY-APQTFTNASCFLTQVDLHLPGVAILDIQMPGVDGIELLQQIKQQDSPLSVIMLTGHGTISMAVQALQHGAIDFLEKPADGDKLQAL--
>Shew_2207_HK_Classic|Shewanella_loihica_PV-4|Pair_Shew_2206|HisKA_525-589/Shew_2206_RR_OmpR|Shewanella_loihica_PV-4|Pair_Shew_2207|Response_reg_7-123	SQRELIQAVAHEFRSPLARVQLAFDMLEEEQDKPTRLIDTINKGLSELEKLIKEALDFIQIES-ILIVDDDADLANLVADFLEMNGY-KTEIEHNGAKAVERIIAEQPMLVILDVMLPDMDGLSICRAVRHGHYNGPILMLTALNNDIDEVAGLETGADDYLAKPVRSRVLLARV-
>Shew_2342_HK_Classic|Shewanella_loihica_PV-4|Pair_Shew_2341|HisKA_317-378/Shew_2341_RR_NtrC|Shewanella_loihica_PV-4|Pair_Shew_2342|Response_reg_8-118	-LGEVTRGIAHSLRNPLHTLGLLSEAVAQSIEDANKLLSQMQQKIAMMDKSIQSLLTLSS----ILVVEDEPDQRALIVQMLTANQY-LVESADSVEQAIVMIKASAPDLVFSDWKLGQLTGMDLLNYVRREHPDMGFIIATAYGTITHAVDAMQAGADDYLAKPYQRQSLLLAI-
>Shew_3113_HK_Classic|Shewanella_loihica_PV-4|Pair_Shew_3114|HisKA_412-498/Shew_3114_RR_NtrC|Shewanella_loihica_PV-4|Pair_Shew_3113|Response_reg_7-119	SLGELSAGIAHEINNPLHAISLFSAAIKDAMEEMAVSSDTIEEAAKRISRIVNDLKRYA-----ILLVDDEASWLRTLAVTLNVPEA-EIDTCVDSRQVLNRLQVGDYALVLLDLTMPFHSGEELLGMIRAEHPNTRVIIVTGVNEVDTAVRCIKHGAYDYFIKTDNVSDLAHTV-
>Shew_3259_HK_Classic|Shewanella_loihica_PV-4|Pair_Shew_3258|HisKA_244-310/Shew_3258_RR_OmpR|Shewanella_loihica_PV-4|Pair_Shew_3259|Response_reg_16-126	-LSHFSADIAHELRTPLTALAMQNEVLLSSTEEYQELIYSNLEELERLTVMVNDMLWLAKSDNGILVIEDEIKIGDYLKKGLEEAGY-TISLCRNGLDGYHCAISEHFDLIILDVMLPDMNGWQILEKIRLNNSDIPVMFLTAKDSLEDKINGLESGADDYLVKPFAFAELLARVK
>Shew_3318_HK_Classic|Shewanella_loihica_PV-4|Pair_Shew_3317|HisKA_222-283/Shew_3317_RR_OmpR|Shewanella_loihica_PV-4|Pair_Shew_3318|Response_reg_6-116	---AFSRYASHELRTPLTIIQGASRLLEQKPEFMQRQRGRIAKAASNMQHIIDALLSLVKQEKGILIIEDNADVAGVLGDYLESQGA-QVDYASNGELGLRLATEGHFDAIVLDLMLPKMDGYAVAKALRQQGSSVPILMLTALDDKQDLLQGFHSGADDYLTKPFDLDELHVR--
>Shew_3420_HK_Classic|Shewanella_loihica_PV-4|Pair_Shew_3419|HisKA_263-328/Shew_3419_RR_OmpR|Shewanella_loihica_PV-4|Pair_Shew_3420|Response_reg_16-126	AKQEFLLHLSHDLKTPLTTLLGYLDTLLSADARDDSLLQYAAASGQKLQQLLAQMLELAALENGILLVEDEPDLARLIRLNLESLQH-EVTQVNTLNQARQQLRSKCFDLLLLDRMLSDGDGLTLCQQLRQEGKSLPCMMITARDSEADIVLGLESGADDYLVKPFSVLELRARV-
>Shew_3560_HK_Classic|Shewanella_loihica_PV-4|Pair_Shew_3561|HisKA_133-186/Shew_3561_RR_NtrC|Shewanella_loihica_PV-4|Pair_Shew_3560|Response_reg_7-109	---YLVRNLAHEIKNPLGGLRGAAQLLSREDADQREFTDLIIEQADRLRNLVDRLLGPQ-----VWVLDDDSSIRWVVERALKGAKI-SCASFAAAESLWQALEQTQPQVIISDIRMPGTDGLTLLDRLQLHYPHIPVIIMTAHSDLDSAVSAYQAGAFEYLPKPFDIDEAI----
>Shew_3571_HK_Classic|Shewanella_loihica_PV-4|Pair_Shew_3570|HisKA_240-298/Shew_3570_RR_OmpR|Shewanella_loihica_PV-4|Pair_Shew_3571|Response_reg_4-113	SQQRLISDISHELRTPLTRLQLALALTRK-KGQASTEIDRIGYEAEQLEAMIAELLELSRV---ILLIDDDLGLAELLAQLLELEGF-NLTLAHDGEAGLALALEQQFDLILLDVMLPKLNGFEVLKALRSKK-QTPVLMLTARGDEIDRVVGLEIGADDYLPKPFNDRELVARIK
>Shew_3638_HK_Classic|Shewanella_loihica_PV-4|Pair_Shew_3637|HisKA_232-291/Shew_3637_RR_OmpR|Shewanella_loihica_PV-4|Pair_Shew_3638|Response_reg_8-118	---LLMAGISHDLRTPLTRIRLASEMMV---EEDEYLKEGIVHDIEDMDAIINQFIAYIRQD--ILVVDDDMRLRALLERYLMEQGY-QVRSAANAEQMDRLLERENFHLLVLDLMLPGEDGLSICRRLRQNGNTIPIVMLTAKGDEVDRIIGLELGADDYLPKPFNPRELLARIK
>Shew_3681_HK_Classic|Shewanella_loihica_PV-4|Pair_Shew_3682|HisKA_467-530/Shew_3682_RR_NtrC|Shewanella_loihica_PV-4|Pair_Shew_3681|Response_reg_33-143	ALGELTAGIAHEINNPTAVILGNMELLKSKAEDVEEEIDIVIEQVGRISTIIRSLLQYSRPG--VLIVDDEPGMRSFLKKALSKK-FALVETAGSVEDAEQLRSRCHFDLLIVDIRLPGRSGIEWDEALSDQERRSDIIFMTGYADMDVAIKALRAGASDFIMKPFHLEQMMKAV-
>Sama_0126_HK_Classic|Shewanella_amazonensis_SB2B|Pair_Sama_0125|HisKA_467-530/Sama_0125_RR_NtrC|Shewanella_amazonensis_SB2B|Pair_Sama_0126|Response_reg_17-127	ALGELTAGIAHEINNPTAVILGNMELLRSKAGQVEEEIDLVIQQVGRISTIIRSLLQYSRPG--VLIVDDEPGMRSFLNKALSKK-FALVETAGSVEEAEQLRSRCHFDLIIVDIRLPGRSGIEWHEALSDEDRRSDIIFMTGYADMEVAIQALRAGASDFIMKPFHLEQMLKAV-
>Sama_0155_HK_Classic|Shewanella_amazonensis_SB2B|Pair_Sama_0154|HisKA_195-251/Sama_0154_RR_OmpR|Shewanella_amazonensis_SB2B|Pair_Sama_0155|Response_reg_5-114	-QRDFINAVSHDFLTPLARMKFTLVMGRSHSQAVSDTFESLDEDLAELEQLIDEFLS-------ILYIEDDHKLAGLVKNFLQSHGF-EVTHLPSAEGALEQLYYGSFDLLLLDIGLPTEDGISLCRQIRDRF-TGQILFMTARRSAVDEVEGLMAGADDYLTKPVAPEILLARIQ
>Sama_0438_HK_Classic|Shewanella_amazonensis_SB2B|Pair_Sama_0437|HisKA_539-594/Sama_0437_RR_OmpR|Shewanella_amazonensis_SB2B|Pair_Sama_0438|Response_reg_7-116	MQRDLMQAVAHEFRAPLARVQLAFDMLMEDAKEQPQLEDRVLRGLEELDELIREIVKLIKA---ILLVDDDQELTELLSDFLTKNGF-EVRTESNGLNAARRIVEERPRLVVLDVMLPDMDGLSICRKVRSQY-AGPILMLTGLGDDIDEVAGLETGADDYIAKPVRSRVLLARIR
>Sama_0631_HK_Classic|Shewanella_amazonensis_SB2B|Pair_Sama_0632|HisKA_185-244/Sama_0632_RR_OmpR|Shewanella_amazonensis_SB2B|Pair_Sama_0631|Response_reg_9-118	--RDLSRIMSHEIRTPLSRMRFVLELAKA--QLSEKHSARLEEDINQIEALTKSYLSFARVEH--LLIEDDLPLAELIVDFLEAEEF-IVIHAESIEDAFTKSQGQNIELVLCDVMLPGQDGFSAFPTLSKKV-PAPIIFMTALAAPEDEIFGLELGAADYISKPVVPNLLLARI-
>Sama_1075_HK_Classic|Shewanella_amazonensis_SB2B|Pair_Sama_1074|HisKA_205-270/Sama_1074_RR_OmpR|Shewanella_amazonensis_SB2B|Pair_Sama_1075|Response_reg_5-117	MRKEFVANVSHELKTPLTVLQGYLEMMQGPDDMNAKPLALMQQQTRRMQSMVEQLLTLSRIED-ILIVEDELAIREMLTFVMEQHGF-TTSVAEDFDSALGQLQEPYPDLILLDWMFPGGSGIQLAKRLKQDERQIPVIMLTARGEEEDKVKGLEVGADDYITKPFSPKELVARIK
>Sama_1548_HK_Classic|Shewanella_amazonensis_SB2B|Pair_Sama_1549|HisKA_294-357/Sama_1549_RR_NtrC|Shewanella_amazonensis_SB2B|Pair_Sama_1548|Response_reg_5-114	-LGEITRGIAHSLRNPLHTLGLLAENQ-SDAAARAVQLGQIQQKIAMMDKHIQSLLTLSSNE--ILVVEDEPGQRELIVGMLKTEGY-RLREADCVEAAIVSIKADTPDLVFSDWKLGQLSGMDLLNYVKREFPDVGFIMATAYGTITHAVDAIQAGADDYLTKPYQRQALLLAI-
>Sama_2006_HK_Classic|Shewanella_amazonensis_SB2B|Pair_Sama_2005|HisKA_496-559/Sama_2005_RR_OmpR|Shewanella_amazonensis_SB2B|Pair_Sama_2006|Response_reg_4-115	---NMSSRLGHELRTPVAVVRSSLEHLSMLGDDRQKYVDRAQEGVSRLSLILANMSEATRLEE-IAIVEDEAAIRENYKDVLQSHGY-LVQTFANRPDAMLAFQTRLPDLAIIDIGLGDDGGFTLCQGLRALSPTIPIIFLTARDSDFDTVTGLRLGADDYLSKEVSFPHLLARL-
>Sama_2212_HK_Classic|Shewanella_amazonensis_SB2B|Pair_Sama_2213|HisKA_376-442/Sama_2213_RR_NtrC|Shewanella_amazonensis_SB2B|Pair_Sama_2212|Response_reg_11-121	--GTMSASINHELNQPLAAIRSYTQNTQTP-GRARENLAIILELTDRLADIVGQFKSFTRKSQ-VLIVDDEPHIGTVLMQLFELNGL-NAEATTDPHLAISLIDRDWPGVVITDVNMPGMDGISLLAQCIRIDADLPVVLLTGFGDIAMAVSALKQGAYDFLEKPFNNEHMLDVV-
>Sama_2300_HK_Classic|Shewanella_amazonensis_SB2B|Pair_Sama_2299|HisKA_134-196/Sama_2299_RR_NtrC|Shewanella_amazonensis_SB2B|Pair_Sama_2300|Response_reg_6-115	ALGKMVATLAHQIRTPLSAALLYAANLASNQDSRSRFQQKLVDRLNELERQVNDMLLMAR-----LLVEDDASLREALLDTLMLAQF-DCVALPSAEEAILALKESRFDMVISDVQMEGIGGMGLLAYLRQYHPKVPLLLMTAFATIDSAVSAIKLGAVDYLAKPFSPEVLLNQV-
>Sama_2400_HK_Classic|Shewanella_amazonensis_SB2B|Pair_Sama_2399|HisKA_377-436/Sama_2399_RR_NarL|Shewanella_amazonensis_SB2B|Pair_Sama_2400|Response_reg_4-114	--GEMASGISHELKQPLAGIRYLAQGCKDNEPEIASALGGVLTQVDRAQETISRLRSF------VYLVDDDPDVLASLKWMLEGLGI-KARAFASAEDFLSTVDLARPAVAVLDVQMPDMDGMSLLEVLSSRPSPLVPLMLTGHGNISMAVKAIQQGAMDFIEKPVDGDKLLALL-
>Sama_2700_HK_Classic|Shewanella_amazonensis_SB2B|Pair_Sama_2699|HisKA_196-255/Sama_2699_RR_OmpR|Shewanella_amazonensis_SB2B|Pair_Sama_2700|Response_reg_7-116	--KELSHTLSHEMRTSLSRLNFTLAILDR--DNLEECRDTLQEDIDELNTLVKEYLDFSRLEH--LLIEDDYQLARSVKRFLTKEGF-EVHHFVNGDDLAELIASNQFDLILCDVMLPGTNGFEIAKSLRQSF-NGPFIFMTALSDVEDQLQGFNLGADDYICKPVPPPLLVARIK
>Sama_2801_HK_Classic|Shewanella_amazonensis_SB2B|Pair_Sama_2800|HisKA_201-269/Sama_2800_RR_OmpR|Shewanella_amazonensis_SB2B|Pair_Sama_2801|Response_reg_9-118	--QHLTNAVSHEIRTPLARLKFALALLKDDDEKLNQFLADMQLDIKEMEQLLSELLTYASLEA-VLLVEDDVRLANLIVDYLKANGM-HVELERRGDTVLTRLLNYKPDIILLDIMLPGMDGLTLIEKLPDYF-AGPILLMSALGSNEDQIKGLELGADDYVVKPVDPALLVARIN
>Sama_3007_HK_Classic|Shewanella_amazonensis_SB2B|Pair_Sama_3006|HisKA_239-296/Sama_3006_RR_OmpR|Shewanella_amazonensis_SB2B|Pair_Sama_3007|Response_reg_3-112	-----LGNLSHGLKTPLAVMQQQVEALGL---SDPEMADAMQQQLDLIRKMIERKLAAAR-----LLVEDNAMLVKELQKQLKQAGF-VTDVTDKVVDADYLIKETQYDCVILDIGLPDGNGLTLLEKWRTEGIHTPVIMLTARSQWHEKVEGFNAGADDYLGKPFHAQELLARI-
>Sama_3182_HK_Classic|Shewanella_amazonensis_SB2B|Pair_Sama_3183|HisKA_375-442/Sama_3183_RR_NarL|Shewanella_amazonensis_SB2B|Pair_Sama_3182|Response_reg_3-113	--GEIGAGLAHELNQPIAAITQYSEGLMAL-QAVEEVLGKINRQSMRAGAVVHRIRSLLR-----FLVDDDEAIRDSLTYMLTQCGR-QLTSFASAEAFLAQADITLPGCLILDSRMPGLSGEALQHELVNQQSPLGIIFLTGHGDLPMALAAFREGACDFFQKPVQAAPLCDAI-
>Sama_3242_HK_Classic|Shewanella_amazonensis_SB2B|Pair_Sama_3243|HisKA_567-630/Sama_3243_RR_PrrA|Shewanella_amazonensis_SB2B|Pair_Sama_3242|Response_reg_11-121	-LGQAMTSMAHELNQPLSAISTFLYTSRMDTALLTDNLERIGQLSKRMHRIVGALKEFARK----LLIDDDEDVLDACRQLFNLSGY-QVRATNSPQKALEALSRDWDGVVISDIYMPAMHGLDLLAAVHHIDPQIPVIMITGHADIPLAVKAVKQGAADFIEKPLDPPTFLALV-
>Sama_3426_HK_Classic|Shewanella_amazonensis_SB2B|Pair_Sama_3427|HisKA_130-183/Sama_3427_RR_NtrC|Shewanella_amazonensis_SB2B|Pair_Sama_3426|Response_reg_9-117	----LVRNLAHEIKNPLGGLRGAAQLLSREDESLKEFTTLIIEQADRMRALVDKLLGPQ-----VWILDDDSSIRWVLEKALKSARI-TSASFAAAESLWQALELSQPLVIVSDIRMPGTDGLTLLERIGLHYPHIPVIIMTAHSDLDSAVAAYQSGAFEYLPKPFDIDEAIALV-
>Sama_3433_HK_Classic|Shewanella_amazonensis_SB2B|Pair_Sama_3432|HisKA_240-301/Sama_3432_RR_OmpR|Shewanella_amazonensis_SB2B|Pair_Sama_3433|Response_reg_4-113	-QQRLMGDISHELRTPLTRLQLALALARK-RGQDSNELNRIAHEAEQLDALIAELLTLSRV----LLVDDDPGLSELLKELLELEGF-VLTLAHDGAEGLSKAVSSHFDLILLDVMLPKLNGFEVLKQLRNHK-QTPVLMLTARGDDIDRVVGLEIGADDYLPKPFNDRELVARIR
>Sama_3511_HK_Classic|Shewanella_amazonensis_SB2B|Pair_Sama_3510|HisKA_234-293/Sama_3510_RR_OmpR|Shewanella_amazonensis_SB2B|Pair_Sama_3511|Response_reg_8-118	---LMMAGISHDLRTPLTRIRLASEMMVD---EDAYLRDGIIADIDDMNAIINQFIAYIRQD--ILVVDDDMRLRALLERYLVEQGF-QVRAAANAEQMDRLLERENFHLLVLDLMLPGEDGLSICRRLRQTGSPLPIIMLTAKGDEVDRIIGLELGADDYLPKPFNPRELLARIK
>Sama_3535_HK_Classic|Shewanella_amazonensis_SB2B|Pair_Sama_3534|HisKA_215-272/Sama_3534_RR_OmpR|Shewanella_amazonensis_SB2B|Pair_Sama_3535|Response_reg_3-113	-----TDNIAHDLRTPLSHLRIGLEQLRDPQEERADKAEQLIEELDFCLATFDAMLSLTRIEEGILLVEDDNTTSEYIVKGFSEQGH-NIEAAADGHQGLLLATSNQYDLIILDRMLPGLDGLALLAALRANANQTPVLILSALSNVDERVKGLRSGGDDYMTKPFAFSELLVR--
>B938_02655_HK_Classic|Bacillus_amyloliquefaciens_subsp._plantarum_AS43.3|Pair_B938_02650|HisKA_136-202/B938_02650_RR_OmpR|Bacillus_amyloliquefaciens_subsp._plantarum_AS43.3|Pair_B938_02655|Response_reg_5-114	-KSELISSVSHDLRTPLTSIIGYLDLLKKSKAQFQEYLETIYSKSQRLKYLIDELFEYTH----ILIVDDDKDIRNLISVYLENEGI-DTQKAEDAAEALKLLEQKEFDLIILDIMMPNMDGIEACMKIREER-NLPIIMLSAKSEDMDKIQGLASGADDYLTKPFNPLELIARVK
>B938_09375_HK_Classic|Bacillus_amyloliquefaciens_subsp._plantarum_AS43.3|Pair_B938_09380|HisKA_245-313/B938_09380_RR_OmpR|Bacillus_amyloliquefaciens_subsp._plantarum_AS43.3|Pair_B938_09375|Response_reg_8-112	-REEWISHISHDIKTPLASIQGYAEIIQDTAEQIREYAQIIESKSLYMKDVMEDLNLTTR----VLIIDDEKEILELIKTVLIREGIDRVVTASTARDGLAQFHQENPDLVILDIMLPDGEGYDICKQIRDIS-HVPIIFLSAKGEETDKIVGLAIGGDDYITKPFSPKEVAYRV-
>B938_13515_HK_Classic|Bacillus_amyloliquefaciens_subsp._plantarum_AS43.3|Pair_B938_13520|HisKA_352-419/B938_13520_RR_OmpR|Bacillus_amyloliquefaciens_subsp._plantarum_AS43.3|Pair_B938_13515|Response_reg_5-115	MRKDFVANVSHELKTPITSIKGFTETLLDDEKALSDFLSIILKESERLQSLVQDLLDLSKMEQ-ILVVDDEQSIVTLLQYNLERSGY-DVITASDGEEALELAENENPDLIVLDVMLPKVDGIDVCKQLRQQKMMVPILMLTAKDEEFDKVLGLELGADDYMTKPFSPREVTARV-
>B938_14130_HK_Classic|Bacillus_amyloliquefaciens_subsp._plantarum_AS43.3|Pair_B938_14135|HisKA_124-182/B938_14135_RR_OmpR|Bacillus_amyloliquefaciens_subsp._plantarum_AS43.3|Pair_B938_14130|Response_reg_4-113	----------HEVKTPLTAMHLMIERLDEY--EWLRIHHLLDQQLHRLSFIEN-----------ILLIEDDNTLFHEMKERLTGWSF-AVHGIKDFSRVIREFTEIKPDLVIIDVQLPKFDGFHWCRMIRSQS-NVPILFLSSRDHPADMVMSMQLGADDFIQKPFHFDVLIAKIQ
>B938_15420_HK_Classic|Bacillus_amyloliquefaciens_subsp._plantarum_AS43.3|Pair_B938_15415|HisKA_242-304/B938_15415_RR_OmpR|Bacillus_amyloliquefaciens_subsp._plantarum_AS43.3|Pair_B938_15420|Response_reg_5-114	--RTLLQNISHDLKTPVMVIRGYTQSIKDPKGDLETTIDVIEGEAEKLEKKIKDLLYLTKLD--IYLVEDEDNLNELLTKYLENEGW-NITSFTKGEDARKQMQPS-PHLWILDIMLPDTDGYTLIKEIKEKDPDVPVIFISARDADIDRVLGLELGSNDYIAKPFLPRELIIRV-
>B938_18805_HK_Classic|Bacillus_amyloliquefaciens_subsp._plantarum_AS43.3|Pair_B938_18810|HisKA_119-166/B938_18810_RR_OmpR|Bacillus_amyloliquefaciens_subsp._plantarum_AS43.3|Pair_B938_18805|Response_reg_4-113	--------WVHQVKTPLSVINLIIQE------EDEPVFEQIKKEVRQIEFGLETLLYSSRLD--IMIVEDSEDIRGLLQNYLEKYGY-QTVAADDFTAVLDVFLREKPDVVLLDINLPSYDGYYWCRQIRQHS-TSPIIFISARSGEMDQVMAIENGGDDYIEKPFSYDIVLAKI-
>HD73_0307_HK_Classic|Bacillus_thuringiensis_serovar_kurstaki_str._HD73|Pair_HD73_0306|HisKA_276-343/HD73_0306_RR_OmpR|Bacillus_thuringiensis_serovar_kurstaki_str._HD73|Pair_HD73_0307|Response_reg_6-115	-KNELITNVSHDLRTPLTSIMGYLRLLRDNKEQHDEYTRIAFAKSEQLKNLIEDLFEYTKLT--ILVVDDEKEIRNLITIYLKNEGY-KVLQAGDGEEGLRLLEENEIHLVVLDIMMPKVDGIHMCMKVREAK-EMPIIMLSAKTQDMDKILGLTTGADDYVTKPFNPLELIARIK
>HD73_0317_HK_Classic|Bacillus_thuringiensis_serovar_kurstaki_str._HD73|Pair_HD73_0318|HisKA_108-175/HD73_0318_RR_OmpR|Bacillus_thuringiensis_serovar_kurstaki_str._HD73|Pair_HD73_0317|Response_reg_6-115	SRKQLLSSISHDIRTPLTSIIGYIDALKDSEIEKQEYLKILYMKSNNLKHLVDEIFNMAKLDA-ILIADDDKEIRNLLKIYLERELY-MVDTAINGEEALHLFNQNKYNLVILDLMMPKIDGIEVCKKLRDKT-NVPILMLTAKDHEVDKILGLSIGADDYITKPFSIHEVIARV-
>HD73_0726_HK_Classic|Bacillus_thuringiensis_serovar_kurstaki_str._HD73|Pair_HD73_0727|HisKA_234-299/HD73_0727_RR_OmpR|Bacillus_thuringiensis_serovar_kurstaki_str._HD73|Pair_HD73_0726|Response_reg_4-113	-RSEFLASVAHELRTPLTYVRGYADIASKPSEQRMRYLSIIKDESDYITNLVQDLFSLAQMEQ-ILLVDDEPRMLELLTLYLTPIGY-NCVCATSGEEAILHIENRNFKFVLLDIMMPKMDGWETCKKIRSFS-NIPIIMVTARDQTVDVVQGLKLGADDYVTKPFHEEELFARIE
>HD73_1530_HK_Classic|Bacillus_thuringiensis_serovar_kurstaki_str._HD73|Pair_HD73_1529|HisKA_238-304/HD73_1529_RR_OmpR|Bacillus_thuringiensis_serovar_kurstaki_str._HD73|Pair_HD73_1530|Response_reg_6-113	-RKEFLANVSHELRTPLSYIKGYSEAILDKGAQQEKVTQLIHKEAGRMQRLVHDLLDLAQLEG-VLVVDDESDMRQLVGMYLDNFGY-EWGEAENGKEALKKLETDHYDFVVLDIMMPEMDGLSVCKEIRKTS-DVPIIFLTAKGEEWNRVNGLRMGADDYIVKPFSPGELVARM-
>HD73_1706_HK_Classic|Bacillus_thuringiensis_serovar_kurstaki_str._HD73|Pair_HD73_1705|HisKA_364-431/HD73_1705_RR_OmpR|Bacillus_thuringiensis_serovar_kurstaki_str._HD73|Pair_HD73_1706|Response_reg_7-116	MRQDFIANVSHELRTPMVMLQGYSEAILDTKEEIDEFVQIIYDESVRLGKLVNELLDLARMESGILIVDDEDRIRRLLKMYLEREQY-TIEEADNGDTALEMALQNDYDLILLDLMMPGKDGIEVCKGVREKK-ATPIIMLTAKGEEVNRVQGFEVGTDDYIVKPFSPREVVLRV-
>HD73_2122_HK_Classic|Bacillus_thuringiensis_serovar_kurstaki_str._HD73|Pair_HD73_2121|HisKA_133-199/HD73_2121_RR_OmpR|Bacillus_thuringiensis_serovar_kurstaki_str._HD73|Pair_HD73_2122|Response_reg_5-114	MRQEFVSNVSHEIQSPLTSIKGFARALQDSEEKRKHYLTIIETETTRLSKLSQNLLKLTLLES-ILIVDDDPHIRELVSVFLEREGF-QTYEAIDGVDALQKMDDVKVDMVILDIMMPNMDGFDVCFELRKYY-DIPVLMLTAKGETSQKVKGFHLGTDDYLVKPFDPIELVVRV-
>HD73_3279_HK_Classic|Bacillus_thuringiensis_serovar_kurstaki_str._HD73|Pair_HD73_3280|HisKA_251-316/HD73_3280_RR_OmpR|Bacillus_thuringiensis_serovar_kurstaki_str._HD73|Pair_HD73_3279|Response_reg_6-115	-RREFFAIVAHELKSPLTVMKGYLEGMIYY-QNRDQYLKKNHQIIESMEQLVREILSVSKLEQ-ILVVEDDQEIQELIKQFLMTQHY-TVIVASDGLEGMTQFNKQSFDLILLDVMMPNLNGFEVSKMIRSQS-NVPIIMLTALEEEEDQMKGFDLGIDDYITKPFSFHVLIRRV-
>HD73_3348_HK_Classic|Bacillus_thuringiensis_serovar_kurstaki_str._HD73|Pair_HD73_3349|HisKA_245-312/HD73_3349_RR_OmpR|Bacillus_thuringiensis_serovar_kurstaki_str._HD73|Pair_HD73_3348|Response_reg_4-111	-QKQFVEDASHELRTPLTIIHGHLAMLNRDPAVLDKSLQSSLKEVVRLNKLVSELLELSRAES-ILIIEDEESLADFLELELKYEGY-KVDIQLDGRKGLSEALEKNYDLILLDLMLPGLNGLEVCRRLRATK-NTPIIMLTARDSIMDRVTGLDSGADDYLPKPFAIEELLARM-
>HD73_4746_HK_Classic|Bacillus_thuringiensis_serovar_kurstaki_str._HD73|Pair_HD73_4747|HisKA_127-179/HD73_4747_RR_OmpR|Bacillus_thuringiensis_serovar_kurstaki_str._HD73|Pair_HD73_4746|Response_reg_4-113	-------QWIHQMKTPVSVIELLLQKFGKEHREARATVESIREENNRILNGLDLALHMARLEQ-ILIVEDDEKIAGILEEHLERYGY-QSFRASDLRQIKDEFVKVNPHLVLLDINLPYFDGFYWCRQIRTVS-NAPIIFVSARTGEMDQVMAIENGGDDYITKPFHLDIVMAKV-
>HD73_4831_HK_Classic|Bacillus_thuringiensis_serovar_kurstaki_str._HD73|Pair_HD73_4832|HisKA_85-152/HD73_4832_RR_OmpR|Bacillus_thuringiensis_serovar_kurstaki_str._HD73|Pair_HD73_4831|Response_reg_5-114	SMRKMLSNISHDLKTPLTVILGYTEMLKDNKEEQQILLEKVHTKTLEVMELIHKFFDLAKLESGILLVEDDISIQEMVEKYLIKEGF-QVTIASDGEEGVNTYLKGSFDLIILDIMMPKLDGLEVVRIIREKS-AVPILMMSAKDTDVDKAVGLGLGADDYICKPFSMIELAARV-
>HD73_4972_HK_Classic|Bacillus_thuringiensis_serovar_kurstaki_str._HD73|Pair_HD73_4971|HisKA_255-319/HD73_4971_RR_OmpR|Bacillus_thuringiensis_serovar_kurstaki_str._HD73|Pair_HD73_4972|Response_reg_4-113	-RKELISNISHDLKTPITSIIGYVEGIKDTPEKMDKYLTTIHTKAKHMDTLIDELFLFSKLD--ILLIEDEVSIAELQRDYLEINDF-QVDVEHSGEIGLQTALQEDYDLIILDIMLPKMNGFEICKQIRAVK-DIPILLVSAKKEDIDKIRGLGLGADDYITKPFSPSELVARVK
>HD73_5162_HK_Classic|Bacillus_thuringiensis_serovar_kurstaki_str._HD73|Pair_HD73_5163|HisKA_141-208/HD73_5163_RR_OmpR|Bacillus_thuringiensis_serovar_kurstaki_str._HD73|Pair_HD73_5162|Response_reg_6-115	SKDQLVVNLAHDLRTPLTSVLGYLDLLKDTKEQIKHFSTIAYTKSQRLESLIDELFEITRMN--ILIVDDEAEIADLIEIHLEKEGY-HVVKAADGEEAVHIIETQPIDLVVLDIMMPKMDGYEVTRQIRAKH-HMPIIFLSAKTSDFDKVTGLVLGADDYMTKPFTPIELVARVN
>Sthe_2665_HK_Classic|Sphaerobacter_thermophilus_DSM_20745|Pair_Sthe_2666|HisKA_419-486/Sthe_2666_RR_OmpR|Sphaerobacter_thermophilus_DSM_20745|Pair_Sthe_2665|Response_reg_6-114	-KDDFLSLVSHELRTPMTTIQGGALLLLQDEETRHEILTDIANESRRLAGLVENMVQLANIRAGVLVADDDAPILRLVRTKLQADGY-SVVTAMNGREAVEIFERERPDIVILDLMMPVMDGFEAMQRIRQMS-NAPVIMLTARSGQADKIRGLDLGADDYVTKPFSPDELSARV-
>Sthe_3274_HK_Classic|Sphaerobacter_thermophilus_DSM_20745|Pair_Sthe_3273|HisKA_157-218/Sthe_3273_RR_OmpR|Sphaerobacter_thermophilus_DSM_20745|Pair_Sthe_3274|Response_reg_3-118	---ALIRQVSHELKTPLSVIRGHASRFAEDPAEARRAWAVVDDEATRLTGLIDQAILMARFE--ILVVDDDPRIRETLAGPLGAAGY-DVTAVGDGAAALAAVERERPDLIILDVAMPGMDGFAVCRELRAYEPRTPVIFLTVRDDFASEETGFQAGADDYVAKPFSIPALLARV-
>Sthe_0181_HK_Classic|Sphaerobacter_thermophilus_DSM_20745|Pair_Sthe_0182|HisKA_228-293/Sthe_0182_RR_OmpR|Sphaerobacter_thermophilus_DSM_20745|Pair_Sthe_0181|Response_reg_7-116	-RRLFIGAVVHDLRTPLFALRGYLEGLEKTPEKRARYIAVAQEKAATLERLIGDLFDFTRLE--VLIVDDEEDIVALMRDFLEAEGY-AVLAAYDGPTALRTLEHEPVDCVLLDVMMPGPSGYDVLRRIRENR-DVPVLFLTARQEDHDKIRGLGLGADDFIVKSATPGEVVARI-
>Sthe_0368_HK_Classic|Sphaerobacter_thermophilus_DSM_20745|Pair_Sthe_0369|HisKA_361-427/Sthe_0369_RR_OmpR|Sphaerobacter_thermophilus_DSM_20745|Pair_Sthe_0368|Response_reg_4-113	-RRDFVANVSHELRTPIASLKALVETLLDDEEVAHEFLARMETEVDGLARLVQDLLELSRAESGILVVEDEASIRTTIAYNLKKAGH-DVRTVADGEAAIAQANADPPDLVILDIMLPTIDGFDVCRHIRRSS-SVPILMLTARDDEVDRVVGLEIGADDYVTKPFSMRELMARVK
>Sthe_0750_HK_Classic|Sphaerobacter_thermophilus_DSM_20745|Pair_Sthe_0751|HisKA_233-300/Sthe_0751_RR_OmpR|Sphaerobacter_thermophilus_DSM_20745|Pair_Sthe_0750|Response_reg_3-113	-QQAFIADASHELRTPLTLLRANAEVLLRFDPEDAALLEDIVAETAHMDHLASNLLTLARLDA-ILVVEDEQRLARLLQRVLQDEGH-TVHLAYDGVTGLDMALRGDYDLAILDLMLPDLDGVEICRHLRAARVRTPILMLTARGAVEDRVTGLNAGADDYLVKPFAMAELVARVN
>Sthe_0911_HK_Classic|Sphaerobacter_thermophilus_DSM_20745|Pair_Sthe_0910|HisKA_305-380/Sthe_0910_RR_OmpR|Sphaerobacter_thermophilus_DSM_20745|Pair_Sthe_0911|Response_reg_4-115	-RKAFVANVSHDLRTPVAIVRGHIERLLALDDEETRSLAVVHQEVLTLERLINDLFTLARIEE-IVVVEDERELATLVERALREEGH-RVEVIRDGAAALERLGQPEPDLIVLDLMLPNVDGLEICRRVRQSK-ITPILMLTARSTELDRVLGLELGADDYLTKPFSLRELQARV-
>Sthe_1269_HK_Classic|Sphaerobacter_thermophilus_DSM_20745|Pair_Sthe_1270|HisKA_340-403/Sthe_1270_RR_NarL|Sphaerobacter_thermophilus_DSM_20745|Pair_Sthe_1269|Response_reg_4-118	-KADFTAMVAHELGYPLSAIRRLTELLARNPELRNRTLASILRETDALDTLVADVQAMATVE--VMLIDDHASTREPLAFMLEEPDLTVVAQAGSLAEARQVLDAPDVDVAVVDLGLPDGSGEELIPELRESRPDAHSLVLTYFSDHERLARAVASGAAGILHKSVPVGDVVDAV-
>Sthe_1940_HK_Classic|Sphaerobacter_thermophilus_DSM_20745|Pair_Sthe_1941|HisKA_134-201/Sthe_1941_RR_OmpR|Sphaerobacter_thermophilus_DSM_20745|Pair_Sthe_1940|Response_reg_10-120	-RSDLAAILSHEMRTPLASIKGYASALEDDEETRREFLLAIDAETDHLTQLIEDVLDASIIEAGILVVEDEPRLVRLIESILRTADY-RVLTAATGADALEMVALEAPDLILLDLLLPGIDGFDVCRRVREFS-DVPIIMLTARTQETDKLRGFELGADDYVTKPFSAKELLARVQ
>Sthe_2026_HK_Classic|Sphaerobacter_thermophilus_DSM_20745|Pair_Sthe_2027|HisKA_247-315/Sthe_2027_RR_OmpR|Sphaerobacter_thermophilus_DSM_20745|Pair_Sthe_2026|Response_reg_7-118	-ERRFVSDASHELRTPLTALRGNAEILLRDPADLRDGLADIRDEAERMGRLVENLLTLARAD--ILVVEDERAIASFLRRGLVFEGY-RVTVADTGARALDAVRDDPPDLIILDIMLPGIDGLEVCRRIRAAGEGMPILMLTARDEVADRVAGLDAGADDYLIKPFAFEELLARVR
>Sthe_2198_HK_Classic|Sphaerobacter_thermophilus_DSM_20745|Pair_Sthe_2197|HisKA_301-369/Sthe_2197_RR_OmpR|Sphaerobacter_thermophilus_DSM_20745|Pair_Sthe_2198|Response_reg_4-113	SQRELVAAVSHELRTPVATLRGYLESALAPPPTLRADLAIMARETEQLQRLIDDLFTLSRVEAGILLVEDARDLAQVIERELTAAGY-RVVLAYDGRTALDLLAREQPDLVVLDWMLPQVDGLEVLRRLRQES-PTPVLMLTARSEEVDRVVGLELGADDYLTKPFSMRELLARVR
>VCLMA_B0125_HK_Classic|Vibrio_cholerae_LMA3984-4|Pair_VCLMA_B0126|HisKA_466-529/VCLMA_B0126_RR_NtrC|Vibrio_cholerae_LMA3984-4|Pair_VCLMA_B0125|Response_reg_6-115	ALGRMSSAITHELNQPLTGLRTLLSSLLEETQLLKANTKLVHSLIDRMAAMTSQLKSF------IALIEDDDIVRQATGQWLQLAGF-DVAMFADGASALEAIEQQSFAAVVSDVRLPDTDGLSLLVALKNVQSLMPVILITGHGDVDMAVKALHQGAFDFIEKPFQPERLANTV-
>VCLMA_B0328_HK_Classic|Vibrio_cholerae_LMA3984-4|Pair_VCLMA_B0329|HisKA_270-333/VCLMA_B0329_RR_OmpR|Vibrio_cholerae_LMA3984-4|Pair_VCLMA_B0328|Response_reg_7-116	-RTTLLASVSHDLKTPLGAIIGSATTLTDSTETQHELLTSIAEQGERLNRSLTKLLDITRY---ILIIEDEAPIQRFLTVLISGYEY-QVKVASTAEQGLHLVANWNPHLILLDLGLPDQDGISLTRELRAWT-QTPIMVISAREKEADKVQALDAGANDYLTKPFGSEELMARIR
>VCLMA_B0362_HK_Classic|Vibrio_cholerae_LMA3984-4|Pair_VCLMA_B0363|HisKA_285-339/VCLMA_B0363_RR_OmpR|Vibrio_cholerae_LMA3984-4|Pair_VCLMA_B0362|Response_reg_5-112	-----LQILTHELRTPIASLSLTVEGFRRLPESLYDEFRRLCEDSRRLRQLAE------------LLVEDDKNLADGLLVSLEQAGY-DCLHAETIADVKQHWDKA--DLVILDRQLPDGDSVQHLMDWKKLK-DIPVILLTALVTVKDKVTGLDAGANDYLTKPFAEAELFARIR
>VCLMA_B0489_HK_Classic|Vibrio_cholerae_LMA3984-4|Pair_VCLMA_B0488|HisKA_565-630/VCLMA_B0488_RR_NtrC|Vibrio_cholerae_LMA3984-4|Pair_VCLMA_B0489|Response_reg_5-115	--GQTMTSLAHELNQPLSAMSAYLFSARLPQVQLAASLDHIENLTERMGKIVNSLRHFARKN--VLLIDDDQDVLDSYLHLMSIAGL-TAKAVIDPTQAMSHIQPDWNGVVLLDMYMPQLHGMELLKQIKAVDDKIPVIVITGHGDIPMAVEAVKMGACDFLEKPINPPQLLTLI-
>VCLMA_A1319_HK_Classic|Vibrio_cholerae_LMA3984-4|Pair_VCLMA_A1320|HisKA_445-508/VCLMA_A1320_RR_NtrC|Vibrio_cholerae_LMA3984-4|Pair_VCLMA_A1319|Response_reg_18-128	ALGELTAGIAHEINNPTAVILGNTELIRFDASRVEEEIDAILLQIERIRNITRSLLQYSRQG--VLVVDDEVGMQLVLKKALS-KWFSRVDLAGSIEDAEVLRGEHHYDLLILDINLPGRSGIEWEEAFTDPDHRADVIFMTGYADLETAISALKLGASDFILKPFNLEQMLQAVQ
>VCLMA_A1428_HK_Classic|Vibrio_cholerae_LMA3984-4|Pair_VCLMA_A1427|HisKA_246-286/VCLMA_A1427_RR_OmpR|Vibrio_cholerae_LMA3984-4|Pair_VCLMA_A1428|Response_reg_3-113	------GNLSHALKTPLSVLKNEVAQLNDLRSQLQPSVEQIQQQIDR-----------------ILVVEDDVQLGQQILSALEQTGW-VPELAQDGIDALYRATAEEWDVIVLDLGLPKLDGLTVLKGIRDENINTPVVILSARDTLTQRVEGLNAGADDYLTKPFEMVELIARIR
>PSE_0571_HK_Classic|Pseudovibrio_sp._FO-BEG1|Pair_PSE_0570|HisKA_319-385/PSE_0570_RR_OmpR|Pseudovibrio_sp._FO-BEG1|Pair_PSE_0571|Response_reg_1-97	--STFASHAAHELKSPVTATKGAVELLLESKDQRTRFLNNILQDSNRLSALLDRLRHLARADN---------------TFAIEKANY-NTIIAENGFEAVACFKQQPVDLIILDIGMPEMDGFEVCREIRKHS-EVPILFLSARDEEIDRILGLEMGGDDYVTKPFSPRELVARI-
>PSE_0579_HK_Classic|Pseudovibrio_sp._FO-BEG1|Pair_PSE_0580|HisKA_209-271/PSE_0580_RR_PrrA|Pseudovibrio_sp._FO-BEG1|Pair_PSE_0579|Response_reg_12-121	---GLATAAAHELGTPLGTIYLTAKELSTKGDPLREDAELVYSQAARCREILKKLTSLSS-----LIVDDDRAFQQRLERAMQKRGF-HTETADGVREALSKVAAQAPDYAVVDMRLEDGSGLDVVEAIRMKKPDARAIILTGYGNIATAVTAVKLGAIDYLAKPADADDILAAL-
>PSE_0642_HK_Classic|Pseudovibrio_sp._FO-BEG1|Pair_PSE_0640|HisKA_371-436/PSE_0640_RR_OmpR|Pseudovibrio_sp._FO-BEG1|Pair_PSE_0642|Response_reg_13-122	---SFAADVAHELKNPLTSLRSAVETLLAKTEQSRELLDVIQHDVKRLDRLITDISEASRIDA-IALVDDDRNILTSVSIALEAEGY-RVQTYTDGTVALEGLQADPPDLAIFDIKMPRMDGMELLRRFRQMS-DLPVIFLTSKDDEIDELFGLKMGADDFIRKPFSQRLLVERVK
>PSE_1873_HK_Classic|Pseudovibrio_sp._FO-BEG1|Pair_PSE_1874|HisKA_245-302/PSE_1874_RR_OmpR|Pseudovibrio_sp._FO-BEG1|Pair_PSE_1873|Response_reg_8-116	-QKRMLASISHDLRTPATRLRLRLEQIESL-HDVEEMTRLIAASLDR------------------LIVDDDEEIASLTADFLKDRGY-TVFTANSAEEAMELLDTNHIDLMVLDIMLPGENGLTLCQRVRQTS-KMPIIIISAITGDTERIVGLELGADDYLEKPFNPRELQARI-
>PSE_2175_HK_Classic|Pseudovibrio_sp._FO-BEG1|Pair_PSE_2176|HisKA_376-440/PSE_2176_RR_NarL|Pseudovibrio_sp._FO-BEG1|Pair_PSE_2175|Response_reg_18-128	----LAGSLAHDLKQPLGAISTFAHSLRKDEETLQKQLTRISEQANRASDFINSMRSF------IIIIDDDDAMREALVCLVESVGL-KAVDFERADDFLQSDLRPCVGVIITDMRIPGTSGLGLLEKLRASGQHLPVIVISAFANLRDGVRAMSLGAVDVLEKPFDEQSLLDKL-
>PSE_2406_HK_Classic|Pseudovibrio_sp._FO-BEG1|Pair_PSE_2407|HisKA_283-339/PSE_2407_RR_OmpR|Pseudovibrio_sp._FO-BEG1|Pair_PSE_2406|Response_reg_8-117	-RTRMLAAISHDLRTPITSLRIRAEFIED-----DEDRERMIATLDEMQAMVEETLAFTREDS-ILIVDDHRDIRESLARYLTKNNM-RTTVAESAAAARKVLKNSSIDLVVLDIMMPGEDGLSLCRHLVETN-QAPVILLTAMAEDTDRVVGLEIGADDYVTKPFNPRELLARIR
>PSE_2487_HK_Classic|Pseudovibrio_sp._FO-BEG1|Pair_PSE_2486|HisKA_242-307/PSE_2486_RR_OmpR|Pseudovibrio_sp._FO-BEG1|Pair_PSE_2487|Response_reg_1-110	---EVSDNIAHDLKTPLTRMRGRVEAALRNAKEGRECLEDTLVETDELINTFNALLRIARVEAG-LIIEDDREAADYLLKALKEAGH-SPDHADNGEDGLELAISNTWDVLVVDRMLPKRDGLSIIETLRASGDETPVLILSALSQVDDRVTGLRAGGDDYLPKPYAFSELLARV-
>PSE_2893_HK_Classic|Pseudovibrio_sp._FO-BEG1|Pair_PSE_2894|HisKA_222-284/PSE_2894_RR_OmpR|Pseudovibrio_sp._FO-BEG1|Pair_PSE_2893|Response_reg_3-111	--QRFIDDAAHEIRTPLTVVKAQCQVIERLDEPTKLRFDNIIEGVDRATHLAAKLLEHARAG--VLLVEDERLIADAIKAFLERHEF-IVDWVDDGLLAEDALRTGEFDLVILDLGLPGQDGLEFLRAVRDDKADVPILILSARETTKNRIDGLNLGADDYLTKPFDMEELLAR--
>PSE_3275_HK_Classic|Pseudovibrio_sp._FO-BEG1|Pair_PSE_3274|HisKA_482-551/PSE_3274_RR_NtrC|Pseudovibrio_sp._FO-BEG1|Pair_PSE_3275|Response_reg_5-113	---DVARRIAHEIKNPLTPIQLSAERIRRDRKVFDQCVDTIIRQVGDIGRMVDEFSSFARM---ILIVDDEADIRELIAGILEDDGY-NTRTAGDSDAALAAIADRRPSLIILDIWLMGLDGLEVLEVIKKENPDLPVVIISGHGNVETAVSAIKKGAYDYIEKPFKADKLVL---
>PSE_3277_HK_Classic|Pseudovibrio_sp._FO-BEG1|Pair_PSE_3276|HisKA_150-205/PSE_3276_RR_NtrC|Pseudovibrio_sp._FO-BEG1|Pair_PSE_3277|Response_reg_6-115	----LAAMLAHEIKNPLSGIRGAAQLLEQASEDDRSLTRLIMEETDRIVKLVDRMEVFS-----ILVADDDSAIRTVLNQALSRAGY-TVRLTSNATTLWRWVSSGEGDLVISDVVMPDENAFDVLPRIRKLRPELPVIIMSAQNTFMTAIKASEQGAYEYLPKPFDLKELTG---
>PSE_4425_HK_Classic|Pseudovibrio_sp._FO-BEG1|Pair_PSE_4424|HisKA_257-311/PSE_4424_RR_OmpR|Pseudovibrio_sp._FO-BEG1|Pair_PSE_4425|Response_reg_14-122	-RTTMLAGVSHDLRTILTRFRLQLALL-----PQSPEADALRKDVDEMNRMLEDYLSFSK----ILLIDDDSRIRDLLNRFLGENGF-RVTVAKDAEEARRRLSGLEFDLLILDVMMPGESGIELAKDLRRSK-AVPILMLTARSEIEDRIEGLEAGVDDYVSKPFEPRELLLRI-
>PSE_4501_HK_Classic|Pseudovibrio_sp._FO-BEG1|Pair_PSE_4502|HisKA_238-299/PSE_4502_RR_OmpR|Pseudovibrio_sp._FO-BEG1|Pair_PSE_4501|Response_reg_11-121	---SFLRHASHELRTPITIISGNASVMEKTDDKQRKVTERIKRASHSMQTIVATLLWLGREQE-VLLIEDDMDLAATVGDYLSFENI-ECDYAFNGQVGLDSALKNQYDLILLDLTLPKVDGLTVCEQLRAQNVTCPILMLTARDAVSDRVAGFEAGADDYLIKPFAFPELAVRI-
>PSE_4934_HK_Classic|Pseudovibrio_sp._FO-BEG1|Pair_PSE_4933|HisKA_379-437/PSE_4933_RR_NtrC|Pseudovibrio_sp._FO-BEG1|Pair_PSE_4934|Response_reg_11-121	-LGEMSAAISHEFNQPLGAIRTHSENAQVKSDRALKSLGKIVAMVERMAAISQ-----------ILLVDDDEDMREALVEGLELADY-HVVPFSRAEEALEHITHEFYGVLVSDIRMPKMGGFDLMKAAFEIDSALPVVLITGHGDVPLAVEAMRAGAYDFKEKPFPVSGLVAVV-
>PSE_4983_HK_Classic|Pseudovibrio_sp._FO-BEG1|Pair_PSE_4984|HisKA_230-289/PSE_4984_RR_OmpR|Pseudovibrio_sp._FO-BEG1|Pair_PSE_4983|Response_reg_13-122	--QTFLRYASHELRTPITVIAGNISLLKSSDPEDAVPVERIQRANLNMRIIVETLLWLGRES---LLIEDDLDLAGTISDVLKMHGI-SCDHAYNGEAGLEFAREGYFDVIILDLTLPKMDGLTVCETLRSEGIDRPVLMLTARDELSDKLAGFEAGTDDYLVKPFAFEELVVRI-
>BAST_0947_HK_Classic|Bifidobacterium_asteroides_PRL2011|Pair_BAST_0946|HisKA_134-198/BAST_0946_RR_OmpR|Bifidobacterium_asteroides_PRL2011|Pair_BAST_0947|Response_reg_14-121	MRRDMVANVSHELRTPVSALQAMVENMADVTEPTPANLEGILEQTHRLSDLIAFLLDLSRMEAGILVVEDEPTLATAIAQRITAEGW-TARVASDGASAVQAASQIKPDLVIMDIMLPVMDGLEATKRIVAER-PVPVLILTARDDEADKVTGLGAGADDYMTKPFSMRELIAR--
>BAST_1087_HK_Classic|Bifidobacterium_asteroides_PRL2011|Pair_BAST_1088|HisKA_320-389/BAST_1088_RR_OmpR|Bifidobacterium_asteroides_PRL2011|Pair_BAST_1087|Response_reg_11-119	-MKQFVSDASHELRTPLAAIHGYAELYRML-ERADKSIQHIEDSSTRMTVLVTDLLSLARLDEG-VVVDDEPSIRDLLVASLHFAGF-AVETAASGSEAIQVIERIQPDLIVLDVMLPDIDGFTVTSRIRQAGIDAPVLFLTARDDTQDKVMGLTVGGDDYVTKPFSLEEVVARIK
>BAST_1142_HK_Classic|Bifidobacterium_asteroides_PRL2011|Pair_BAST_1143|HisKA_81-142/BAST_1143_RR_OmpR|Bifidobacterium_asteroides_PRL2011|Pair_BAST_1142|Response_reg_4-112	--RQMLTNLTHDIKTPLTVARGYAQLLKE-GSADQEQLGKILNNLQSVDHYLHYLMDFNLIQ--ILVVEDQEDIQSLLKDVLG-ETY-RIIQATTGAQALARFQQEEPDLILLDLMLPVVTGDSVLKAIRHMS-SVPVIILTAIQDKTRTVSLLEQGANDYVTKPFDIDELRARVQ
>BAST_1585_HK_Classic|Bifidobacterium_asteroides_PRL2011|Pair_BAST_1586|HisKA_276-325/BAST_1586_RR_OmpR|Bifidobacterium_asteroides_PRL2011|Pair_BAST_1585|Response_reg_19-127	SQRRQVAALAHDLKTPLTIMRGNADLLEELNQEQQSYLDSIEDAIREMAD--------------ILVVDDDPRITTLLMAALSKDGY-AVTVVNESRKVVS-MDLSSVDLILCDVMMPHMDGFALLAAIRERV-SCPIVFLTAKTDEDSAVLAYGLGADDYIRKPFGIAELRAKV-
>Chro_0524_HK_Classic|Chroococcidiopsis_thermalis_PCC_7203|Pair_Chro_0523|HisKA_206-271/Chro_0523_RR_OmpR|Chroococcidiopsis_thermalis_PCC_7203|Pair_Chro_0524|Response_reg_3-113	-LQRFTADASHELRAPLAAILSNAQVLLADTNSPRQRLENIVDLSKSMSTLIGNLLFLARHEG-ILLVEDDPAQLEPIHAALSQAGH-TVDTAKDGETAQWLITQKDYDLLIVDWMLPKVSGVSLCQQYRQTGKTAPVLLLTAKDTIADKVVGLDAGADDYLVKPIDLLELLARV-
>Chro_0563_HK_Classic|Chroococcidiopsis_thermalis_PCC_7203|Pair_Chro_0564|HisKA_261-324/Chro_0564_RR_OmpR|Chroococcidiopsis_thermalis_PCC_7203|Pair_Chro_0563|Response_reg_4-114	SQRNFINDASHELRTPITIIRGHLELMGDDPQEREETVALVTDELDRMSRFVDDLLLLAKAEQ-ILIVEDEPRISAFIEKGLKANGY-TVSVVRDGDEALLVANSKDFDLMILDIGLPRQDGWTILSTLRGQGEYLPIVILTARDDVNDKVAGLEGGADDYMTKPFRFEELLARVR
>Chro_0875_HK_Classic|Chroococcidiopsis_thermalis_PCC_7203|Pair_Chro_0874|HisKA_252-317/Chro_0874_RR_OmpR|Chroococcidiopsis_thermalis_PCC_7203|Pair_Chro_0875|Response_reg_29-138	-LRQFLADVSHELRTPLTVIGGYADLLLRTPEENTRLLRAMRREINRTERLVRDLLLLVRSD--VLVVDDEQSIIDSIELGLRYEGF-EVRSVQRGYAAIDVASAWSPQLVILDGNLPDLDGFNVCRQIRRQS-DVLIILLTVRDDLADKIKGLELGADDYLTKPFHFSELLARIR
>Chro_1272_HK_Classic|Chroococcidiopsis_thermalis_PCC_7203|Pair_Chro_1271|HisKA_401-468/Chro_1271_RR_CheY|Chroococcidiopsis_thermalis_PCC_7203|Pair_Chro_1272|Response_reg_8-129	MKSEFLANTSHELRTPLNAIIGCIRLVRDDRTEELEFLARADEAAIHLLGIINDLLDIARIEAGILLVEDDSGDVQLTKLALEESKM-SVNVVEDGVEALALLRKEGPDIILLDLNLPKKDGREVLAEIKADPKRIPVIVLTASQAETDILNAYNLNANCYIIKPVDFDRFVKIV-
>Chro_1434_HK_Classic|Chroococcidiopsis_thermalis_PCC_7203|Pair_Chro_1433|HisKA_192-253/Chro_1433_RR_OmpR|Chroococcidiopsis_thermalis_PCC_7203|Pair_Chro_1434|Response_reg_21-136	-RDRWVSDLAHELKTPLTSILLVVENLQQLEPPYKLWVDRLLPEVERLISLVQNWLELSQLE--ILVVEDENLIREMLVMALEAEGF-AIATAADGRTALTLLQSSEFDLVILDLMLPQINGLDICRLLRHQGNQVPILILSAKGSETDRVLGLEVGADDYLTKPFSMRELVAR--
>Chro_2220_HK_Classic|Chroococcidiopsis_thermalis_PCC_7203|Pair_Chro_2219|HisKA_276-344/Chro_2219_RR_NarL|Chroococcidiopsis_thermalis_PCC_7203|Pair_Chro_2220|Response_reg_16-128	-LEDLISALSHDLRTPLLATRNTLRPMLNVDETWREILEEYRQSNEQLLKLVDNLLDVSRYEAGILLVEDHALMRRGMKGQFAEPDFCVVGEAADGRVAVQLAAELEPDVVLMDIDLPVMDGIAATQQIKSDRPTTRILALSAFDNDTQVMGMLAAGADGYCLKTIEWEQLLAVI-
>Chro_3032_HK_Classic|Chroococcidiopsis_thermalis_PCC_7203|Pair_Chro_3033|HisKA_209-274/Chro_3033_RR_OmpR|Chroococcidiopsis_thermalis_PCC_7203|Pair_Chro_3032|Response_reg_3-115	--QQFTADAAHELRTPLAALSATVESALRPEPEAREILQTVNRQNQRLTALVADLLLLSRMER-VLLVEDEPDLGTAIKRTLNQEKY-VVDLVFNGTEAWDYLENQQYTLAIFDWLLPGMSGIDLCKRLRRQNSPLPVLMLTAKDSVEDRVAGLSAGADDYLVKPFSMAELLARVK
>Chro_3172_HK_Classic|Chroococcidiopsis_thermalis_PCC_7203|Pair_Chro_3171|HisKA_106-173/Chro_3171_RR_NarL|Chroococcidiopsis_thermalis_PCC_7203|Pair_Chro_3172|Response_reg_7-119	-REDFASTLTHDLKTPLLGAIETLKAWEQVTPTHYKILEKMIRSHQSTLQLVETLLDVYRNDT--LLVEDDELFRLGLEVKLQESGIEIVAEAEDGETAVEMVQRHALDVVLLDVGLPGIGGVEACRQIKQQNPQLPVLVLTSHSQKSLIARLIAAGAAGYCLKGIAAETLILAI-
>Chro_3314_HK_Classic|Chroococcidiopsis_thermalis_PCC_7203|Pair_Chro_3315|HisKA_205-270/Chro_3315_RR_OmpR|Chroococcidiopsis_thermalis_PCC_7203|Pair_Chro_3314|Response_reg_3-113	-LQRFTSDASHELRAPLAAVMSNAQVGSKDPSQQRLRFEKIVKVAKSMEALIGQLLFLARHEG-ILLVEDDSEQLEPLQTALTEAGH-IVDGVDDGAMAQWLLSQKDYDLLILDWMLPEVSGVSLCRQYRQTGKTSPVLMLTAKDTTPDKITGLDAGADDYLVKPIDILELLARV-
>Chro_3366_HK_Classic|Chroococcidiopsis_thermalis_PCC_7203|Pair_Chro_3367|HisKA_193-255/Chro_3367_RR_OmpR|Chroococcidiopsis_thermalis_PCC_7203|Pair_Chro_3366|Response_reg_3-113	----FTANASHELRSPLTVIKSNIGLILNH-AADKKRIAAIAWAADQMTNLIEDLLFLARSDQ-ILVVEDNELIAETLADVLQDQHY-VVDIALDGEAGWQQAEAFDYDLILLDLMLPKLDGISLCKRLRSSGYGKPILMLTARDSSADKIVGLDSGADDYVIKPFDVNELAARIR
>Chro_5393_HK_Classic|Chroococcidiopsis_thermalis_PCC_7203|Pair_Chro_5392|HisKA_528-594/Chro_5392_RR_CheY|Chroococcidiopsis_thermalis_PCC_7203|Pair_Chro_5393|Response_reg_12-133	-LKKFAYVASHDLQEPLNQVANYVQLLEMLDADAKEFINFAVEGVSLMQTLIDDVLAYSKVE--IFLVEDNRADVRLIEEALKSSVPHQVMSVRDGVNAIAFLRQEGPDLILLDLNLPKKDGREVLAEIKADPKSIPVVVLTTSRNDEDIAHSYALHVNCYITKSRNLSQLFQIV-
>R0052_00505_HK_Classic|Lactobacillus_helveticus_R0052|Pair_R0052_00500|HisKA_377-444/R0052_00500_RR_OmpR|Lactobacillus_helveticus_R0052|Pair_R0052_00505|Response_reg_5-114	SQRQFVSNVSHELRTPLTSLQAYIEALNEDPEIAPKFLEVTQQETSRMIRMINDLLSLSRMDRGILVVDDEKPISDIIKFNLTKEGF-DVDTAYDGEEAVKKVDEYDPDLMILDLMLPKKDGLEVAREVRQTH-DMPIIMVTAKDTEIDKVLGLEMGADDYVTKPFSNRELVARVK
>R0052_03465_HK_Classic|Lactobacillus_helveticus_R0052|Pair_R0052_03460|HisKA_272-338/R0052_03460_RR_OmpR|Lactobacillus_helveticus_R0052|Pair_R0052_03465|Response_reg_4-113	-QKQFVGDVSHELRTPVAVIEGHLNMLERDPQILDESIKASLQEADRMKHLIQEMLDLTRAEQ-ILIIEDEKNLARFVELELQHENY-ETVVENNGRKGLEDALNQDFDAILLDLMLPDLNGLEIARRVRQVK-TTPIIMMTARDSVIDRVSGLDHGADDYIVKPFAIEELLARL-
>R0052_07985_HK_Classic|Lactobacillus_helveticus_R0052|Pair_R0052_07990|HisKA_253-319/R0052_07990_RR_OmpR|Lactobacillus_helveticus_R0052|Pair_R0052_07985|Response_reg_3-115	-RDQFMADAAHEMRTPLTTINGILEGLQYPEESKPKSIDLMQRETKRLVRLVNENLDYEKIRN-ILMVEDDNSVAEMMGMFFKKEGW-QQDIAVDGVEAVDMFKENAYDLITLDLNLPKKDGIQVAKEVRAISPTVPIIMLTARGSESDQVLGLGIGADEYVTKPFSPIALIARIK
>R0052_10600_HK_Classic|Lactobacillus_helveticus_R0052|Pair_R0052_10605|HisKA_153-218/R0052_10605_RR_OmpR|Lactobacillus_helveticus_R0052|Pair_R0052_10600|Response_reg_3-113	SKDELITNVSHDIRTPLTSIIGYLGLLKSSPEDQQKYVDIAYTKAEQMKSLANDLFEYTTLK--ILVVDDDKEIVELLSIYLKNEGYEPIA-AYSGKEAITKLTTPDIALMILDIMMPNMSGIEVIKEVRKDS-DIPIIIVSAKTGDMDKIQGLITGADDYVSKPFNPLEVMARV-
>LEGAS_0309_HK_Classic|Leuconostoc_gasicomitatum_LMG_18811|Pair_LEGAS_0308|HisKA_377-444/LEGAS_0308_RR_OmpR|Leuconostoc_gasicomitatum_LMG_18811|Pair_LEGAS_0309|Response_reg_4-113	-RRMFVSNVSHELRTPLTSVRSYVDALAEDPEMAQNFLGVVQDETQRMIRMINDLLALSRLDQGILVVDDEKPISDIIKFNLTKEGY-EVVTAADGQEALTVFNEEKPDLVLLDQMLPEIDGVEVLRQIRSKS-ETPVIMVTAKDSEIDKVLGLEMGADDYVTKPFSNRELVARVK
>LEGAS_0380_HK_Classic|Leuconostoc_gasicomitatum_LMG_18811|Pair_LEGAS_0379|HisKA_205-272/LEGAS_0379_RR_OmpR|Leuconostoc_gasicomitatum_LMG_18811|Pair_LEGAS_0380|Response_reg_7-116	-QQDFVNNAAHELRTPMAVIQGKLENMTRTVREQSDAIILSLSEVRRLTSLTNNMLTLAKSGS-ILLIEDDVNLADNIVGFLE--DFADVNVVNNGLDGEFEGQESPYDLIISDLMLPGENGFEVIKYLRKNGIETPVLILTAKSSLDDKIEGFNVGADDYLTKPFYREELLVRV-
>LEGAS_1403_HK_Classic|Leuconostoc_gasicomitatum_LMG_18811|Pair_LEGAS_1404|HisKA_134-200/LEGAS_1404_RR_OmpR|Leuconostoc_gasicomitatum_LMG_18811|Pair_LEGAS_1403|Response_reg_4-113	-QQQFVSDVSHELRTPVAIVKGHMDLLNREPDVLNDSIVSSLSEMQRMENLINEMLNLTRAEQ-VLIVEDEENLAKFVGLELKHEGY-EVETVLDGRSGLDAALENNYDVILLDLMLPELNGLEVARRLRESK-KTPIIMMTARDSVIDRVSGLDYGADDYLVKPFAIEELLARIR
>LEGAS_1626_HK_Classic|Leuconostoc_gasicomitatum_LMG_18811|Pair_LEGAS_1627|HisKA_135-202/LEGAS_1627_RR_OmpR|Leuconostoc_gasicomitatum_LMG_18811|Pair_LEGAS_1626|Response_reg_3-113	SKDEMITNISHDLRTPLTAIIGYLGLVEMSSAEKAKYIHTAYDRSNQMKVLVEDLFAFSQTQ--ILVVDDDIEIAELLEIYLKNEGY-EPVMASDGKEAISKLNTNPIALMVLDVMMPNMNGLEVVKIVRKDS-RIPILMLSAKSGDMDKIQGLITGADDYVTKPFNPLEVMARV-
>KHP_0038_HK_Classic|Helicobacter_pylori_51|Pair_KHP_0037|HisKA_167-219/KHP_0037_RR_OmpR|Helicobacter_pylori_51|Pair_KHP_0038|Response_reg_5-116	---HFLKNTTHELNTPMSTLVLSLKTLED-----NQQHHRIKIAIQRMSFLYR-----------IFLLEDDYLLSESVKEFLEHLGY-EVSCAFSGKEAYERLSVERFNLLLLDVQVPEMNSLELFRRIKNDFISTPVIFITALQDNATLKNAFNLGASDYLKKPFDLDELEARIK
>KHP_0162_HK_Classic|Helicobacter_pylori_51|Pair_KHP_0163|HisKA_204-265/KHP_0163_RR_OmpR|Helicobacter_pylori_51|Pair_KHP_0162|Response_reg_4-113	-RVLFLRSIMHELRTPITKGKILSSMLKER---FSSHLNMLIEQFARIEQL-------------VLMIEDDIELAEFLSEFLLQHGI-HVTNYDEPYTGISAANTQNYDLLLLDLTLPNLDGLEVCRRISKQK-HIPIIISSARSDVEDKIKALDYGADDYLPKPYDPKELLARIQ
>KTR9_0739_HK_Classic|Gordonia_sp._KTR9|Pair_KTR9_0738|HisKA_259-328/KTR9_0738_RR_OmpR|Gordonia_sp._KTR9|Pair_KTR9_0739|Response_reg_15-125	-MRRFVADASHELRTPLTSIKGFAELYSQL-PDVTDAMRRIDDEAGRMNLLVEDLLMLARLDA-VLVVDDEENIRQLLSVSLKFQGY-EVETAADGPAALDRCRAAKPDVLVLDVMMPGMDGFGLLRRLRADGVEAPALFLSARDTVEDKINGLTIGGDDYVTKPFSLEEVVARL-
>KTR9_0897_HK_Classic|Gordonia_sp._KTR9|Pair_KTR9_0898|HisKA_131-196/KTR9_0898_RR_OmpR|Gordonia_sp._KTR9|Pair_KTR9_0897|Response_reg_4-113	-RRDFVANVSHELKTPVGAIGLLAEALLEDTDSVQHFSRRVVGETKRMGNMVSELLALSRLQDGVLIVEDEESLADPLAFLLRKEGF-EASVITDGAQALSTFDRVSPDIVLLDLMLPGMSGTEICKALRTRS-NVPVIMVTARDSEIDKVVGLELGADDYVTKPYSARELIARIR
>KTR9_1119_HK_Classic|Gordonia_sp._KTR9|Pair_KTR9_1120|HisKA_171-234/KTR9_1120_RR_OmpR|Gordonia_sp._KTR9|Pair_KTR9_1119|Response_reg_6-113	AQRRLVADTAHALRNPLAAVRFRLDTLGLLTGRALESHQKTLVEIDRLDRIVEDLLVLATAEA-IAVVEDDDGVGDALVDALIEVGH-EPRRMRRGADLL--LGHRGFDLALLDLGLPDEDGLTVLRRLRTVS-DIPVVVLTARQDERSVVRALRGGADDYVVKPARLGELMARL-
>KTR9_1311_HK_Classic|Gordonia_sp._KTR9|Pair_KTR9_1310|HisKA_275-347/KTR9_1310_RR_OmpR|Gordonia_sp._KTR9|Pair_KTR9_1311|Response_reg_3-113	-QARLVADAGHELRTPLTSLRTNLELLIAPEDDMIELRADVVAQIEELSTLVGDLVDLAREDA-ILVVDDDRAVRESLRRSLTFNGY-SVETAGDGIEALEKILADRPDVVILDVMMPRLDGLEVCRRLRSAGDDLPILVLTARDSVSERVSGLDAGADDYLPKPFALEELLARL-
>KTR9_1782_HK_Classic|Gordonia_sp._KTR9|Pair_KTR9_1781|HisKA_213-275/KTR9_1781_RR_OmpR|Gordonia_sp._KTR9|Pair_KTR9_1782|Response_reg_4-114	--REVAGDASHQLRSRLTAIQLRLEELTLV-TEAEAALDQIERLACELDDLVE-----------VLLAEDDAAIAEPLARALTREGY-GCEVVSTGADALEKALDTRYELLILDLGLPVLDGLEVCRRVRAQRPALAVLMLTARTDEVDFVVGLDAGADDYVGKPFRLAELLARVR
>KTR9_3611_HK_Classic|Gordonia_sp._KTR9|Pair_KTR9_3612|HisKA_297-363/KTR9_3612_RR_OmpR|Gordonia_sp._KTR9|Pair_KTR9_3611|Response_reg_5-114	-QRQFTSDVSHELRTPLTTVRMASDVLGRLDPVRKRSVELLDKELDRFETLLNELLEISRHDAGILVVDDDAALAEMLTIVLRGEGF-EPFVVGDGTQALTAVREIRPDLVLLDLMLPGMNGIDVCRVLRADS-GVPIVMLTAKSDTVDVVLGLESGADDYMVKPFKPKELVARVR
>KTR9_4019_HK_Classic|Gordonia_sp._KTR9|Pair_KTR9_4018|HisKA_615-682/KTR9_4018_RR_OmpR|Gordonia_sp._KTR9|Pair_KTR9_4019|Response_reg_8-117	-RRALLSAVGHDLRTPLAAAKAAVSSLRSSPEDTAELLATVDESVDHLTSLVGNLLDSSRLAAGVLVVDDEPQLLRALRINLNARGF-AVTTAATGAAALAAAARENPHVVVLDLGLPDIDGLTVLEGLRGWT-TVPVIVLSARTDAADKVVALDSGADDYVTKPFGMEEFLARL-
>KTR9_4565_HK_Classic|Gordonia_sp._KTR9|Pair_KTR9_4564|HisKA_290-352/KTR9_4564_RR_OmpR|Gordonia_sp._KTR9|Pair_KTR9_4565|Response_reg_4-114	-QRQFVDDAGHELRTPITVVRGHLELLPDDPEERRKTLDLVDSELGRMGRIVGDLLLLAKSEQ-VLIAEDDARIASFIGNGLRAAGY-STEHVSDGLSALEAVRGGGFDMVVLDIGLPSMDGFDVLYCMRGEGITTPVVVLTARDSVSDTVSGLEGGANDYMTKPFQFAELLARIR
>hp2017_0169_HK_Classic|Helicobacter_pylori_2017|Pair_hp2017_0170|HisKA_204-258/hp2017_0170_RR_OmpR|Helicobacter_pylori_2017|Pair_hp2017_0169|Response_reg_4-113	-RVLFLRSIMHELRTPITKGKILSSMLKEL--PQKRHLNTLIEQFARIEQL-------------VLMIEDDIELAEFLSEFLLQHGI-HVTNYDEPYTGISAANTQNYDLLLLDLTLPNLDGLEVCRRISKQK-HIPIIISSARSDVEDKIKALDYGADDYLPKPYDPKELLARIQ
>Cenrod_0668_HK_Classic|Candidatus_Symbiobacter_mobilis_CR|Pair_Cenrod_0669|HisKA_215-281/Cenrod_0669_RR_OmpR|Candidatus_Symbiobacter_mobilis_CR|Pair_Cenrod_0668|Response_reg_7-119	MRREFLANVAHEIRTPLTVLSGFVETLQTNKAERQRCLVWMEKQTLRMRHLVEDLLVLSSLEE-ILLVEDEEAIAELLGVHLRHAGY-RAVWARDGACAQARIEEAVPDAILLDWMLPGDSGLTWARRWRAQPRSVPILMLTARGEEADKVMGLDAGADDYIAKPFSMRELLARVR
>Cenrod_0901_HK_Classic|Candidatus_Symbiobacter_mobilis_CR|Pair_Cenrod_0900|HisKA_139-196/Cenrod_0900_RR_NtrC|Candidatus_Symbiobacter_mobilis_CR|Pair_Cenrod_0901|Response_reg_6-115	-NREMFRNLAHEVKNPLGGIRGAAQLLDMASPELQEYTRVIIHEADRLQSLVDKLLAPHR----IWIVDDDQSIRFVLEKALSRESL-VTRSFATAQEVFEALEHGGPQVLVSDIRMPGVSGLELLDRIKARHPGLPVIIMTAYSDLDSAVAAFQGGAFEYLPKPFDLQRAVELI-
>Cenrod_1032_HK_Classic|Candidatus_Symbiobacter_mobilis_CR|Pair_Cenrod_1031|HisKA_528-597/Cenrod_1031_RR_PrrA|Candidatus_Symbiobacter_mobilis_CR|Pair_Cenrod_1032|Response_reg_4-115	---EVARRLAHEIRNPLTPIQLSAERLERLDEGQRASVRTIVAQVEAMLRLVNEFRDYARLP--ILVVDDEVGIRDLLSEILIDEGY-NVELAQNAAQARAACQRQTPDLVLLDIWMPDTDGVTLLKEWAGSGLTMPVIMMSGHGTIETAVEATRIGAVAFLEKPIAMHKLLHAV-
>Cenrod_1204_HK_Classic|Candidatus_Symbiobacter_mobilis_CR|Pair_Cenrod_1205|HisKA_140-202/Cenrod_1205_RR_CheY|Candidatus_Symbiobacter_mobilis_CR|Pair_Cenrod_1204|Response_reg_4-118	--GTLAAGIAHDFNNLLGSIIGFAEMAGDEDTPGKRDIQQVLKASFRARDLVARLLAFARQ---ILVIDDDEQFRAMLTQMLTQERH-RVTAATDGKMGLELLSHFTPDLIITDILMPNKDGIELILELVHKGCTIPMIAISGGRRSIHAQSATLMGVNATLTKPFTREDLRNAIR
>Cenrod_1231_HK_Classic|Candidatus_Symbiobacter_mobilis_CR|Pair_Cenrod_1230|HisKA_248-303/Cenrod_1230_RR_OmpR|Candidatus_Symbiobacter_mobilis_CR|Pair_Cenrod_1231|Response_reg_14-123	----MLAGISHDLRTPLGHLRLEIELA----VPDPQSRANMVRDIAQLDAIVDKFLDYARPG--ILLVDDDSRGRELLRRYLIQQGF-DVLQAEDGAAMARLRLRETVDLIVLDLMLPGEDGLSLCKRMRADGDTTPVIMLTAKGNDIDRIHGLEEGADDYLGKPCNPMELVARI-
>Cenrod_1474_HK_Classic|Candidatus_Symbiobacter_mobilis_CR|Pair_Cenrod_1473|HisKA_207-267/Cenrod_1473_RR_OmpR|Candidatus_Symbiobacter_mobilis_CR|Pair_Cenrod_1474|Response_reg_5-118	-QKSLLANASHELRSPLARIRMGMELLGN--AIAPPLRKELERNVAELDQLVEEILLASRLDA-ILMIEDDSRLAQMVGTYLGQSGY-GFAHAGDGRTGLDAVQATVPDLVILDLMLPDMDGLEVCRRIRTLEAQTPILMLTAKGDPMDRIIGLEIGADDYLPKPFEPRELLARIR
>Cenrod_2383_HK_Classic|Candidatus_Symbiobacter_mobilis_CR|Pair_Cenrod_2384|HisKA_230-287/Cenrod_2384_RR_OmpR|Candidatus_Symbiobacter_mobilis_CR|Pair_Cenrod_2383|Response_reg_9-118	-RTTLFAGVSHDLRTPLARMRLALEMLRE--QPAPALIDRIDRDIEHIDALLQNVLALAR----ILVVDDDPGLRELLASYLGANGF-AVIGVGDGVAMRAVLAEGGIDAIVLDLMLPGEDGLSLVRAVRATS-AMPILMLSARGEELDRIVGLEVGADDYLPKPCAPRELLARL-
>Patl_0081_HK_Classic|Pseudoalteromonas_atlantica_T6c|Pair_Patl_0082|HisKA_281-360/Patl_0082_RR_OmpR|Pseudoalteromonas_atlantica_T6c|Pair_Patl_0081|Response_reg_6-115	SLGDMVAGVAHEVNTPIGLGVTASTMMLDFISEGQENLNIIYRNLNRAAELISSF---------ILIVEDEVVTRTTLKSLFEAEGY-NVFEAENGSEMHEFFENHAINLVIMDINLPGKNGLILAREVRDRK-NIGLIFLTGRDNDVDRILGLEIGADDYLTKPFNPRELTIR--
>Patl_0217_HK_Classic|Pseudoalteromonas_atlantica_T6c|Pair_Patl_0218|HisKA_267-335/Patl_0218_RR_OmpR|Pseudoalteromonas_atlantica_T6c|Pair_Patl_0217|Response_reg_5-115	-RRVLLADLSHDLRTPLASLQGYIETLLNSKQDREHFVDVSLKNAKNLKHLIDQIFELAYLEGGILIVEDDLDIANLMRVNLLELGV-EIDHQVDGETALHQALSNEYDVILLDVMLPNMSGLDICRKIRDERPMQIIIMLTSKNSETDRVLGLELGADDYMTKPFSVRELQARV-
>Patl_0226_HK_Classic|Pseudoalteromonas_atlantica_T6c|Pair_Patl_0225|HisKA_223-282/Patl_0225_RR_OmpR|Pseudoalteromonas_atlantica_T6c|Pair_Patl_0226|Response_reg_8-118	---LLTAGISHDLRTPLTRIRLATEML---PEAQDWLKEGIVNDIEDMNEIIDQFINYVRQDQ-ILVVDDDMRLRSLLERYLVEQGY-QVRAAANAEQMDRMLERENFHLMVLDLMLPGEDGLSICRRLRQKENEIPIVMLTAKGDEVDRIIGLEMGADDYLPKPFNPRELLARVK
>Patl_0423_HK_Classic|Pseudoalteromonas_atlantica_T6c|Pair_Patl_0424|HisKA_574-638/Patl_0424_RR_CheY|Pseudoalteromonas_atlantica_T6c|Pair_Patl_0423|Response_reg_18-126	-LERFAFVASHDLQEPLRKIQSFGGRIQQLSDRGHDYLTKMMNSAERMQALIKGVLSFSRIH--ILVADDDLDDQELIQDALADNAIDKLRFVNDGEELTRFLADAKPSIILLDLNMPRKSGREALDDIKQNPKHIPVVMFTTSDSDIDIKECHMLGCNAYLTKPNNYLDLV----
>Patl_0643_HK_Classic|Pseudoalteromonas_atlantica_T6c|Pair_Patl_0644|HisKA_185-244/Patl_0644_RR_OmpR|Pseudoalteromonas_atlantica_T6c|Pair_Patl_0643|Response_reg_3-113	--QQFASNAAHELRTPLSVLKINLHNLRKTSDSYVQRIDKLHQDTDRMIHAINQILLLSRT---ILLVEDDRSLSDALSQSLRSEGY-AVNGACTAAQALSALATGEFTIMILDLGLPDMDGLEVLRQAHRNKHSVPTLILTARDSMTDKITGLDSGADDYLAKPFDMQELLARL-
>Patl_0988_HK_Classic|Pseudoalteromonas_atlantica_T6c|Pair_Patl_0987|HisKA_245-312/Patl_0987_RR_OmpR|Pseudoalteromonas_atlantica_T6c|Pair_Patl_0988|Response_reg_6-116	--KRLLADISHELRSPLTRMQLAIGIAQQNTKSNEQALARIEKEAHQMEHMVAQVLMLSRLDN--LLIDDDQALTELLQEYLSAQGY-TIHVASDGEAGLLAAKSGQYDLIILDVMLPKVDGFEVLKRLRSTH-VTPVLMLTAKGDDFDRILGLELGADDYLAKPFNHRELSARV-
>Patl_1027_HK_Classic|Pseudoalteromonas_atlantica_T6c|Pair_Patl_1028|HisKA_133-188/Patl_1028_RR_NtrC|Pseudoalteromonas_atlantica_T6c|Pair_Patl_1027|Response_reg_8-117	--RELIRGLAHEIKNPLGGIRGAAQLLEKPSADLKEFTTMIIEQSDRLRNLVDRLL--------VWIVDDDSSIRWVLQKALQAASI-PCFSFENPEDLLLQLQTDQPEVIVSDIRMPQMDGMALLEEVHKRYPNIPVIIMTAHSDLDSAVNAYQSGAFEYLPKPFDIDEAV----
>Patl_1528_HK_Classic|Pseudoalteromonas_atlantica_T6c|Pair_Patl_1527|HisKA_259-321/Patl_1527_RR_OmpR|Pseudoalteromonas_atlantica_T6c|Pair_Patl_1528|Response_reg_7-116	AKNRWFADISHELRTPLTILLGELDALEAIRPFGPEQIESLQQEALLLHRLVDDLYQLSMSD--ILIVEDEPKIAQILVDFLTIEGF-ATQVVHNGDEAEDAIRTKTPDCVILDLMLPGKDGLSICKDVRKFS-QVPIIMLTARVDEIDRLMGLGFGADDYVCKPFSPREVVARV-
>Patl_2252_HK_Classic|Pseudoalteromonas_atlantica_T6c|Pair_Patl_2251|HisKA_203-270/Patl_2251_RR_OmpR|Pseudoalteromonas_atlantica_T6c|Pair_Patl_2252|Response_reg_21-131	---TFLSYASHELRTPISVIRSNVDLLRRMTEKQQITLARIERAGLTMSDLTDTLLWLSHNDE-VLLVEDDIDLASTVVDYLELESM-QCDHASNGLMGLHLIERQSYQVIILDINMPKMDGITLCKRMRELGIDTPVLMLTARDTLDNKLEGFQAGSDDYLVKPFAMQELVARIQ
>Patl_2302_HK_Classic|Pseudoalteromonas_atlantica_T6c|Pair_Patl_2301|HisKA_235-297/Patl_2301_RR_OmpR|Pseudoalteromonas_atlantica_T6c|Pair_Patl_2302|Response_reg_8-118	-QQQLLHDVSHELRAPLARLQVSAALIEQK-SPDSRHVKQIHNDCLRIDQLIQQILDYSKLEQGILLVDDDETLCSLLSEFLQEEGF-EVETLHSGNAATERLQSDEFDTVVLDIMMPGMSGLDVLRSVRAKR-QVPILMLTGRGDDIDRIVGLEMGADDYLGKPCNPRELSARIK
>Patl_3050_HK_Classic|Pseudoalteromonas_atlantica_T6c|Pair_Patl_3049|HisKA_159-225/Patl_3049_RR_NtrC|Pseudoalteromonas_atlantica_T6c|Pair_Patl_3050|Response_reg_6-115	SLGKMVASLAHQIRTPLSAAMLYAANLSSAKESRQRFSDKLLSRLRDLEGQVNDMLLFAKSGN-ILIVEDDAGLREALVDTLLLGGY-NVLAADCAERGMMMMNEEAIDLVVSDIQMGEMSGLSLLRSLKNKYPNVPVLLMTAYATIDDAVTAMRDGATDYLSKPFAPEVLLNL--
>Patl_3412_HK_Classic|Pseudoalteromonas_atlantica_T6c|Pair_Patl_3411|HisKA_230-291/Patl_3411_RR_OmpR|Pseudoalteromonas_atlantica_T6c|Pair_Patl_3412|Response_reg_6-115	-QRQLLADLSHELRTPLTRIDMAVDFVEQ-NINPKQALERLRYEAATMRNLVEDTLTLAWLNN-ILIIEDDATLSGQVARLLEEKGF-NTHQCLDGQKGLLCALQESFDLILLDVLLPSLNGFNVLNQIRRSK-QTPVMMITACGAEQERIEGYRKGADDYLPKPFNFTEMMLRI-
>Patl_3572_HK_Classic|Pseudoalteromonas_atlantica_T6c|Pair_Patl_3571|HisKA_198-253/Patl_3571_RR_OmpR|Pseudoalteromonas_atlantica_T6c|Pair_Patl_3572|Response_reg_4-113	SQRELSGAVAHEFRTPLARLKFALEA---QPASNSEKWNAMSLDVEELERLVQEMLDYA-----ILLVEDDARLSQLVSEYLNQHDF-TVTSLSDGTGLLDEIKQHSPDLVVLDVMLPGDNGFTLCKKIRPEY-QGPLLFMTAKNSDFDHVLGLEIGADDYVMKPVEPRVLLARIQ
>Patl_3919_HK_Classic|Pseudoalteromonas_atlantica_T6c|Pair_Patl_3920|HisKA_524-587/Patl_3920_RR_OmpR|Pseudoalteromonas_atlantica_T6c|Pair_Patl_3919|Response_reg_9-120	-LQNMSARLSHELRTPVAIVKSSLENLQLQTDEDAQYIERAQLGIKRLSTILNNMSEATRLEQ-IALVEDDLAIRENYAAALKKQGY-EVICYANRRQAEQGFAQRLPDLAIIDIGLQDDGGFMVCQQLRSLSKTLPIIFFTARDNDYDTICGLRMGADDYLTKDISLPHLLARI-
>H175_ch1246_HK_Classic|Bacillus_thuringiensis_serovar_thuringiensis_str._IS5056|Pair_H175_ch1245|HisKA_238-304/H175_ch1245_RR_OmpR|Bacillus_thuringiensis_serovar_thuringiensis_str._IS5056|Pair_H175_ch1246|Response_reg_6-113	-RKEFLANVSHELRTPLSYIKGYSEAILDKGPQQEKVTQLIHKEAGRMQRLVHDLLDLAQLEG-VLVVDDESDMRQLVGMYLDNFGY-EWGEAENGKEALKKLETDHYDFVVLDIMMPEMDGLSVCKEIRKTS-DVPIIFLTAKGEEWNRVNGLRMGADDYIVKPFSPGELVARM-
>A2cp1_0125_HK_Classic|Anaeromyxobacter_dehalogenans_2CP-1|Pair_A2cp1_0124|HisKA_270-334/A2cp1_0124_RR_NtrC|Anaeromyxobacter_dehalogenans_2CP-1|Pair_A2cp1_0125|Response_reg_9-113	--GGIAAGFAHELGNSLNVIRGYAAVTSRDDSPHRSDVEAIRREVTRAAGLIERFLVFARAR---MVIDDLDSARQMMKRTLA-RSY-DVYDFPSVAEAVPAVERADFDCIVTDLRMPGIDGIEGLRRFQAKVPEIPVILVTAFATVETAVEAMKAGAFDYLKKPFEPEELEL---
>A2cp1_0323_HK_Classic|Anaeromyxobacter_dehalogenans_2CP-1|Pair_A2cp1_0324|HisKA_270-328/A2cp1_0324_RR_NtrC|Anaeromyxobacter_dehalogenans_2CP-1|Pair_A2cp1_0323|Response_reg_8-116	--GRLAAGVAHEINNPLGVILGYAKLLRKADGALAEDLAVVEEEALRAKHIVDGLLDLSR----VLVADDKENMRKLLAKILA-DGY-AVEEAEDGARALSLVATRPYDVVVTDIRMPGADGFELLGAVKARAPDTEVVMMTGYATIADAVRAMRMGAFDYLEKPFDPDAALA---
>A2cp1_0439_HK_Classic|Anaeromyxobacter_dehalogenans_2CP-1|Pair_A2cp1_0440|HisKA_72-138/A2cp1_0440_RR_OmpR|Anaeromyxobacter_dehalogenans_2CP-1|Pair_A2cp1_0439|Response_reg_5-115	-QTDFVNKVSHELRTPLTSIRMFVETLQLDPQRQREALEIVAEETARLSGLINRLLDWARMESGILVIEDDPSILRGLQLNLGMEGY-TVRSATDGETGLQLARTEQPDLVVVDVMLPRMGGLEVIREIRKEDPELPILILSAKNQETDKVAGLQLGADDYLGKPFGLKELLARI-
>A2cp1_0447_HK_Classic|Anaeromyxobacter_dehalogenans_2CP-1|Pair_A2cp1_0446|HisKA_1298-1360/A2cp1_0446_RR_NtrC|Anaeromyxobacter_dehalogenans_2CP-1|Pair_A2cp1_0447|Response_reg_31-140	ALGELSAVVAHEVRNPLGVIFNSLGSLRRPQGDARMLLDIVGEEADRLNRIVGDLLDFARP---VLVVDDQKNMRATTAILLRQAGH-VVEEAEDGASATQRVQHESFDVVLTDLRMPTVDGMEVLRAVQQASPETQVIVMTAYGTIESAVEAIRRGAYDFLAKPFKESEVLLRV-
>A2cp1_0532_HK_Classic|Anaeromyxobacter_dehalogenans_2CP-1|Pair_A2cp1_0533|HisKA_203-267/A2cp1_0533_RR_NtrC|Anaeromyxobacter_dehalogenans_2CP-1|Pair_A2cp1_0532|Response_reg_4-114	-LATMAAMVAHEIRNPLGVIRGAAELVRALAPRDQEALADVLGEVERLRRLTEDFLDLARD---VLVVDDEPKLGRFVQEMLELDGH-EVVRAGGGVEALARLGEGAFDVVVTDLRMPQVDGLAVLRAARARTPPPEVVMMTAHGSAESAVEAMKAGAADYVTKPFPMDELRLRV-
>A2cp1_0659_HK_Classic|Anaeromyxobacter_dehalogenans_2CP-1|Pair_A2cp1_0660|HisKA_307-368/A2cp1_0660_RR_NtrC|Anaeromyxobacter_dehalogenans_2CP-1|Pair_A2cp1_0659|Response_reg_4-114	-LGRVAAGLAHELRNPLASMAGSVELLRALGGDERRLLDIVLREASRLDELVTEFLRFAR----ILVVDDEQSMREFLEILLRKQGH-EVVAAATLGAALACAAEGDLDLVLSDLRLGAESGIQLLEAVKREAPGTEVIILTAFATTENAIQAMKLGAYDYVLKPFKVEELKLVI-
>A2cp1_0672_HK_Classic|Anaeromyxobacter_dehalogenans_2CP-1|Pair_A2cp1_0673|HisKA_149-217/A2cp1_0673_RR_NtrC|Anaeromyxobacter_dehalogenans_2CP-1|Pair_A2cp1_0672|Response_reg_6-116	-VGRLASGVAHEVGNPLGAIAGYAELARGEAAQADDLVARIAVEAGRIDAIVRDLLELARP---VLVVDDEASIRHLLSVILVDHGY-DPRAVATGEEALKELAVREYDLVLTDVRMPGMGGLGLLREIQRTAPELMVIVMSAYGAHDAAIEAMKTGAYDYLSKPFKPDEVVL---
>A2cp1_0884_HK_Classic|Anaeromyxobacter_dehalogenans_2CP-1|Pair_A2cp1_0883|HisKA_240-293/A2cp1_0883_RR_NtrC|Anaeromyxobacter_dehalogenans_2CP-1|Pair_A2cp1_0884|Response_reg_13-123	----LSGEIAHELKNPLASVKGLAGLLAQGPGKPTERLAVLRQEVDRMQTILDGFLNFSR----VLVVDDDPGVRYTLREILASEGL-EVEEATDGEAALEKLGAQPCPLVLTDLRMPRLDGMALLRKITAGHPATRVVVITAHGSERQAVEAVKAGAYDYFKKPFETEELLAVV-
>A2cp1_0943_HK_Classic|Anaeromyxobacter_dehalogenans_2CP-1|Pair_A2cp1_0942|HisKA_291-357/A2cp1_0942_RR_OmpR|Anaeromyxobacter_dehalogenans_2CP-1|Pair_A2cp1_0943|Response_reg_8-117	--SGLLSSVSHDLRTPLAAITGAGTLLLDDPAIRRDLAATVVDEAERLERLVSNLLDMTRLEGGVLVVEDEAPVRRFLRAALAAHGY-RIEEAGTVAEAEQLAPGHNPDVFLLDLGLPDGDGIDLARRLREWT-RAPIIVLSARGREEDKVTALDAGADDYLTKPFGVNELLARVR
>A2cp1_1044_HK_Classic|Anaeromyxobacter_dehalogenans_2CP-1|Pair_A2cp1_1045|HisKA_183-250/A2cp1_1045_RR_CheY|Anaeromyxobacter_dehalogenans_2CP-1|Pair_A2cp1_1044|Response_reg_7-117	-RARFLAHATHELRSPVNAIVALAELLRML-ADVEAKIPVLARSAAELRGTVNELLDLSKLEAGILVIDDDATHLLLTRELLEAEGY-DVQVHETAFGATERIIQQAPDLVLVDVNMPALSGEGLVSVLRRRERGVRVFLHSSNDEHALREAAARLGIEGYVPKG-DPELLRRRV-
>A2cp1_1707_HK_Classic|Anaeromyxobacter_dehalogenans_2CP-1|Pair_A2cp1_1708|HisKA_244-299/A2cp1_1708_RR_NtrC|Anaeromyxobacter_dehalogenans_2CP-1|Pair_A2cp1_1707|Response_reg_4-111	---QVGAKVAHELKNPLTGVKALVQLGLRAEAASHERLEVVDREVTRMQEIIQNYLSFNR----VLLVDDEPSVRAALKELVQGRGW-EPVLACSASEALEQLERA--DVLVTDFSMPEMDGLALLQAVRERDEWLPVILLTAHGSERLAVRAMKAGAYEYVPKPFDVDELALAI-
>A2cp1_1802_HK_Classic|Anaeromyxobacter_dehalogenans_2CP-1|Pair_A2cp1_1801|HisKA_287-377/A2cp1_1801_RR_NtrC|Anaeromyxobacter_dehalogenans_2CP-1|Pair_A2cp1_1802|Response_reg_13-120	-LGVLVSGVAHEINNPNGFILLNMPALKDAREEVPRMLDEMLDGARRIRRIVEDLKDFARRED-VLLVDDEAAWLRSMRVALQRAGVDHVLATQEPREVPELLAREPVGLVLLDLNMPHLSGEALLERLAAERPEVAVIVISGMNQVETAVRCVKAGALDYYVKTAEEDRLV----
>A2cp1_1854_HK_Classic|Anaeromyxobacter_dehalogenans_2CP-1|Pair_A2cp1_1855|HisKA_329-418/A2cp1_1855_RR_NtrC|Anaeromyxobacter_dehalogenans_2CP-1|Pair_A2cp1_1854|Response_reg_11-120	-MGVLVSGVAHEINNPAGYILLNVPTLKAMRDEIPQMLDEIAEGGRRIKRIVDDLKDFARRDD-ILAVDDEAAWLRSVSLTLEAAGITHLLTCQDARRVMEVLDGNDVGVVLLDLTMPHLSGEDLLGRISVEHPDVKVIVVSGMNQVETAVRCMKLGAFDYHVKTEEEDRLVA---
>A2cp1_1973_HK_Classic|Anaeromyxobacter_dehalogenans_2CP-1|Pair_A2cp1_1974|HisKA_29-80/A2cp1_1974_RR_CheY|Anaeromyxobacter_dehalogenans_2CP-1|Pair_A2cp1_1973|Response_reg_7-116	-------FVAHEVRNPLSTALWSAELLARGGARGEKLTAMCLRSLGRVRQLVEDHFL-------VLVVDDDPDILDAICDILEGEGY-RVARARHGLEALDRVAEEEPSIILLDLMMPVMDGLAFAQALRQRRARIPIVVISADGN---PQKAASVGAQGYLAKPFDIDALLAQV-
>A2cp1_2057_HK_Classic|Anaeromyxobacter_dehalogenans_2CP-1|Pair_A2cp1_2056|HisKA_480-541/A2cp1_2056_RR_NtrC|Anaeromyxobacter_dehalogenans_2CP-1|Pair_A2cp1_2057|Response_reg_4-113	ALGEMSAGLAHEIRNPLAAIKAAIQYLDPVPEDDREFFEIVVEEVNRLNGVVTQFLDYSR----VLIVDDEVNIRRVLAAMLKREGY-EVTTAADGEQALGVLHRTPVHVVVTDLVMPRVGGMELLRRVSQDFPDVPVILITAHGSVDSAVAALKAGAFDYITKPFEQEELKKVI-
>A2cp1_2175_HK_Classic|Anaeromyxobacter_dehalogenans_2CP-1|Pair_A2cp1_2176|HisKA_350-441/A2cp1_2176_RR_NtrC|Anaeromyxobacter_dehalogenans_2CP-1|Pair_A2cp1_2175|Response_reg_11-120	-LGVLVSGVAHEINNPNGLILLDLQVLDDLREAMPSMVSDALDASRRVKRIVEDLKDFARQES-VLLVDDEPGWLRTMSLSLESLGVTNLLTCQDPREVMGLLGRHEVGLVLLDLTMPHLPGEELLRRIVEAHPEVSVIVVSGLNQLETAVRCMQAGAFDYFVKTSEEDRIVK---
>A2cp1_2344_HK_Classic|Anaeromyxobacter_dehalogenans_2CP-1|Pair_A2cp1_2343|HisKA_229-288/A2cp1_2343_RR_PrrA|Anaeromyxobacter_dehalogenans_2CP-1|Pair_A2cp1_2344|Response_reg_16-126	SLATLAAGAAHELSTPLSTIAVVAKELQRASSELHDDLQLVRDQVARCREILDRM---------ILLVDDDEVLRERLATAIRARGY-EVRTAGSAEEAMREATRDSPEMAVLDLRMPGGSGLEILRELRRQDPSTRVLMLTGYGSIATAVEAVREGAVGYLPKPADADEILAALN
>A2cp1_2399_HK_Classic|Anaeromyxobacter_dehalogenans_2CP-1|Pair_A2cp1_2398|HisKA_106-170/A2cp1_2398_RR_NtrC|Anaeromyxobacter_dehalogenans_2CP-1|Pair_A2cp1_2399|Response_reg_5-115	-LTRIAAGVAHDIKNPLNAMALQLALLTEASGAAASHLGALRDQVVRVNEVLRRLVDVA-----VLIVDDETDSREALAELTQRWGY-DVQTASDGTEALRRAIEGHPDVILTDLVMPNMDGLWLLRALRAELPDCPVVLLTGRGTIQTAVQAIREGAFDFIEKPLEVPRLRLV--
>A2cp1_2498_HK_Classic|Anaeromyxobacter_dehalogenans_2CP-1|Pair_A2cp1_2499|HisKA_227-288/A2cp1_2499_RR_NtrC|Anaeromyxobacter_dehalogenans_2CP-1|Pair_A2cp1_2498|Response_reg_4-112	----MSSQISHELKNPLGAIKALVQISARSDGDTCERLKVVSSEVERMREILDGYLSFSR-----LLVDDEPAVLYALKELARSNGH-EPVTARSGAEALERLE--GVDAVVTDYAMPEMDGLQLLQAIHERDASLPVVVLTAQGSERVAVRAMKAGAYEYVTKPFDIDEMTL---
>A2cp1_2815_HK_Classic|Anaeromyxobacter_dehalogenans_2CP-1|Pair_A2cp1_2816|HisKA_191-251/A2cp1_2816_RR_CheY|Anaeromyxobacter_dehalogenans_2CP-1|Pair_A2cp1_2815|Response_reg_5-114	MREEFLSTAAHEFKTPLAVVKAYAQLMQK-RAPGDPGLAVIQRQVDRLNRLVQHLLDTSRLR--VLVVEDDQDLSSLLEMVLADAGH-RVRTAPDGRAALAAVAAEMPGVILLDMRMPVMNGWEFAREFRSRYRACPIVVVTAAEN--ARLRAEEIGAEDWLAKPFDLDDVLY---
>A2cp1_3107_HK_Classic|Anaeromyxobacter_dehalogenans_2CP-1|Pair_A2cp1_3106|HisKA_207-268/A2cp1_3106_RR_OmpR|Anaeromyxobacter_dehalogenans_2CP-1|Pair_A2cp1_3107|Response_reg_10-118	--RELLANVSHELRTPLARIRVALELAAEDAARARRYLGEIGQDLAELDALVQDVLDAARLEA--LLVEDDLRLAAFTREYLEGHGV-AVVHATDGRRGLDEALGGRFDVVLLDLMLPGKDGLEVCRELRSRS-DVPVIVLTARGEEADRVMGLELGADDYLAKPFSPRELLARIR
>A2cp1_3137_HK_Classic|Anaeromyxobacter_dehalogenans_2CP-1|Pair_A2cp1_3138|HisKA_242-302/A2cp1_3138_RR_OmpR|Anaeromyxobacter_dehalogenans_2CP-1|Pair_A2cp1_3137|Response_reg_11-120	--TELMANVAHELRTPLARIRVALDLAAEDADVARASLADIAEDLSELERLVDDVLASARLD--VLFVEDDERLAALTTRYLESHGH-AVTWVADGQLGLAEALKGQHDVVILDLMLPRKSGLEVCRELRARL-PVPIIMLTALGEEADRVLGLETGADDYLAKPFSSRELLARL-
>A2cp1_3869_HK_Classic|Anaeromyxobacter_dehalogenans_2CP-1|Pair_A2cp1_3870|HisKA_393-457/A2cp1_3870_RR_NtrC|Anaeromyxobacter_dehalogenans_2CP-1|Pair_A2cp1_3869|Response_reg_18-128	--GSLAAGLAHEIGTPLNVISATAEFLLPAGEEARAQLRGIVAETERISRLVRDLLSFARGT--VLVVEDDPRLLDILTRHLDRMGY-AVRGAGGAAAALQLLEAAPADVVLSDVRMPGMDGRTLLAEVRARHPDAKVILMTAFGSVDDAVEAMQAGAYSYVVKPFKVETVAA---
>A2cp1_3996_HK_Classic|Anaeromyxobacter_dehalogenans_2CP-1|Pair_A2cp1_3997|HisKA_241-307/A2cp1_3997_RR_OmpR|Anaeromyxobacter_dehalogenans_2CP-1|Pair_A2cp1_3996|Response_reg_3-113	-QDRLVADAAHELRTPLTLMRTSIDLALREAPELVETLDETRREVDRLARLATRLLDLATAGR--LLVEDEDRVARVLARGLAEEGH-QVDVCGTGLAAREQATTIAYDVVLLDWSLPDLDGISVLREWRSRGLRTPVLLLTARGSTGEKVTGLRAGADDYLVKPFDFDELIARIE
>A2cp1_4150_HK_Classic|Anaeromyxobacter_dehalogenans_2CP-1|Pair_A2cp1_4151|HisKA_156-221/A2cp1_4151_RR_OmpR|Anaeromyxobacter_dehalogenans_2CP-1|Pair_A2cp1_4150|Response_reg_4-116	-RRDFVANASHELRTPIAAIRAAAETLLSDPAAGRAFVEIVARHAERLSRLTQDLLDLSRIES-VLLVDDERDLLSLLDFNLRASGF-ETLLATTGEQALSHLRRRVPDLVLLDVMLPDVSGTEVCRQIKSDPRHVPVVMLTAKGDEVDRVVGFELGADDYVTKPFSVRELVLRL-
>A2cp1_4405_HK_Classic|Anaeromyxobacter_dehalogenans_2CP-1|Pair_A2cp1_4406|HisKA_141-197/A2cp1_4406_RR_NtrC|Anaeromyxobacter_dehalogenans_2CP-1|Pair_A2cp1_4405|Response_reg_4-113	----LAAGLAHEIKNPLAGLQGSAELLARAEGPAREYAAVIAREAKRVDGLVRELLDLARP---VLIVDDEPSVRFVLARTCERAGV-PYEEAGSAEEARTKLRASGVGLVLLDVRLPGDDGFKLLGEIGGRVDSPFIVVMTAEDTMRSAVEAMKRGAADYLGKPFDLERVERI--
>SFV_2139_HK_Classic|Shigella_flexneri_5_str._8401|Pair_SFV_2140|HisKA_240-304/SFV_2140_RR_OmpR|Shigella_flexneri_5_str._8401|Pair_SFV_2139|Response_reg_13-122	MRRDFMADISHELRTPLAVLRGELEAIQDVRKFTPETVASLQAEVGTLTKLVDDLHQLSMSDEGILIVEDEPKLGQLLIDYLRAASY-APTLISHGDQVLAYVRQTPPDLILLDLMLPGTDGLTLCREIRRFS-DVPIVMVTAKIEEIDRLLGLEIGADDYICKPYSPREVVARV-
>SFV_3072_HK_Classic|Shigella_flexneri_5_str._8401|Pair_SFV_3071|HisKA_238-301/SFV_3071_RR_OmpR|Shigella_flexneri_5_str._8401|Pair_SFV_3072|Response_reg_5-104	--RRFTSDAAHELRSPLTALKVQTEVAQLDPQARKKALLQLHSGIDRATRLVDQLLTLSRLDS------------DGIKTGLSKMGF-SVDWFTQGRQGKEALYSAPYDAVILDLTLPGMDGRDILREWREKGQREPVLNLTARDALAERVEGLRLGADDYLCKPFALIEVAARL-
>SFV_4118_HK_Classic|Shigella_flexneri_5_str._8401|Pair_SFV_4117|HisKA_144-201/SFV_4117_RR_OmpR|Shigella_flexneri_5_str._8401|Pair_SFV_4118|Response_reg_3-113	--RLFTADVAHELRTPLAGVRLHLELLAK---THHIDVAPLVARLDQMMESVSQLLQLARAG--ILIVEDDTLLLQGLILAAQTEGY-ACDGVTTARMAEQSLEDGHYSLVVLDLGLPDEDGLHFLARIRQKKYTLPVLILTARDTLTDKIAGLDVGADDYLVKPFALEELHARIR
>SFV_4433_HK_Classic|Shigella_flexneri_5_str._8401|Pair_SFV_4432|HisKA_257-319/SFV_4432_RR_OmpR|Shigella_flexneri_5_str._8401|Pair_SFV_4433|Response_reg_8-116	----YVYALTHELKSPLAAIRGAAEILREPPEVVAHFTDNILTQNARMQALVETLLRQARLEN-VWLVEDEQGIADTLVYMLQQEGF-AVEVFERGLPVLDKARQQVPDVMILDVGLPDISGFELCRQLLALHPALPVLFLTARSEEVDRLLGLEIGADDYVAKPFSPREVCARV-
>BaLi_c03120_HK_Classic|Bacillus_licheniformis_9945A|Pair_BaLi_c03110|HisKA_85-152/BaLi_c03110_RR_OmpR|Bacillus_licheniformis_9945A|Pair_BaLi_c03120|Response_reg_4-113	SMKRMLTNMSHDLKTPLTVVLGYIEAIQNAEEERERLLEKLYQKTGEIIQLMNSFFDLAKLES-ILLIEDDHSISEMVDHYLTKEGF-EVVLAFDGEEGVRLFQQGNYDVILLDIMLPKLNGMDFLKLIREQS-KVPVLMISAKDGDVDKALGLGFGADDYIAKPFSMIELTARIK
>BaLi_c03350_HK_Classic|Bacillus_licheniformis_9945A|Pair_BaLi_c03340|HisKA_237-300/BaLi_c03340_RR_OmpR|Bacillus_licheniformis_9945A|Pair_BaLi_c03350|Response_reg_4-112	-KKEQIGALAHDIKIPMTIIKGNAELLSLQNQEQSEYIRYILDAGQKIDQYIDQLIHLSKTEE-ILAVDDEKDILVLIQNILRRDQH-QVHTLSQVN-AESLDVFSGYDLILLDVMMPGMDGFELCEKIRPLV-DCPILFLTAKTEEEAIVKGLLTGGDDYISKPFGVLELSARV-
>BaLi_c04810_HK_Classic|Bacillus_licheniformis_9945A|Pair_BaLi_c04800|HisKA_247-313/BaLi_c04800_RR_OmpR|Bacillus_licheniformis_9945A|Pair_BaLi_c04810|Response_reg_3-112	-RRQFITDVSHELKTPLTTISGLVEGMNSPEDQQDKCMKLITEETKRLIRLVNENLDYEKIRS-ILMIEDNLSVCTMTEMFFAKEGF-ETEFVHDGLEGYNRFKSDDWDLLIIDIMLPSMDGVTICKKVREES-TVPIIMLTAKDTESDQVLGFELGADDYVTKPFSPLALVARIK
>BaLi_c12770_HK_Classic|Bacillus_licheniformis_9945A|Pair_BaLi_c12780|HisKA_232-298/BaLi_c12780_RR_OmpR|Bacillus_licheniformis_9945A|Pair_BaLi_c12770|Response_reg_3-110	-RNDFLSSVAHELRTPITYIKGYTDVAMRDPQARNQYLSIIKEEADNLNTLVDDLFLLTKLK--VLLVDDEIRMLDLLELYLE--HY-SCTKAATGKEALDLIKMNNFDLVILDIMMPEMDGWMVCQEIRRLT-SVPIIMLTAKNGQDDIVRGLNCGADDYLTKPFSEKVLLARIE
>BaLi_c25400_HK_Classic|Bacillus_licheniformis_9945A|Pair_BaLi_c25410|HisKA_260-326/BaLi_c25410_RR_OmpR|Bacillus_licheniformis_9945A|Pair_BaLi_c25400|Response_reg_6-115	--KRFFDNMTHELKTPLTSIQGYAEIIKNKGESDRAGMNHIVEESRRLHNLVIKLLEVSREQS-ILIIEDDEAIADLLSYGLTSEGF-ETCTVNNGSLGMRELDQFKPDLLLLDWMLPDCSGLDICKTVTESY-NIPILMITAKSDITDKILGLEFGADDYITKPFDLREVVARIR
>BaLi_c25420_HK_Classic|Bacillus_licheniformis_9945A|Pair_BaLi_c25430|HisKA_363-429/BaLi_c25430_RR_OmpR|Bacillus_licheniformis_9945A|Pair_BaLi_c25420|Response_reg_9-118	-RKDFIANVSHELRTPISMLQGYSEAIVDSEEEKKEIAQVIYDESLRMGRLVNDLLDLARMEAGILVVDDEARIRRLLKMYLERENY-KIEEAENGDEAIDKALGNEYDLILLDLMMPGTDGIEVCRQVRDKK-ATPIIMLTAKGEEANRVQGFEVGTDDYIVKPFSPREVVLRV-
>BaLi_c26240_HK_Classic|Bacillus_licheniformis_9945A|Pair_BaLi_c26250|HisKA_113-180/BaLi_c26250_RR_OmpR|Bacillus_licheniformis_9945A|Pair_BaLi_c26240|Response_reg_6-115	-RKRLLSNISHDIRTPLTSIIGYVDALKDSEEEKQEYLNILSKKSNSLKQLIDEIFNMAKLDA-VLIADDEKEIRDLLKTYLKRECY-EVDVAVDGEDALRLFEQNHYHLVILDVMMPKIDGIEVCRRMRNHT-NVPILMLTAKDLEGDKILGLSIGADDYITKPFSVNEVLARI-
>BaLi_c41410_HK_Classic|Bacillus_licheniformis_9945A|Pair_BaLi_c41400|HisKA_119-166/BaLi_c41400_RR_OmpR|Bacillus_licheniformis_9945A|Pair_BaLi_c41410|Response_reg_4-113	--------WVHQVKTPLSVINLIIQE------EDEPVFKQIKKEVQQIEYGLETLLYSSRLD--IMIVEDSEDIRKLLCDHLEKYGY-ETVAATDFTSILEMFLQEKPDLILLDINLPAYDGYYWCRQIRQHS-TCPIIFISARSGEMDQVMAIENGGDDYIEKPFSYEVVLAKI-
>BaLi_c42610_HK_Classic|Bacillus_licheniformis_9945A|Pair_BaLi_c42620|HisKA_119-171/BaLi_c42620_RR_OmpR|Bacillus_licheniformis_9945A|Pair_BaLi_c42610|Response_reg_4-113	----FMDQWVHQMKTPLSVIELTAQNLDEE-------SSSIREETERMKTGLNTILYMARLR--VMIVEDDPKIADLLKSHIVKYGY-NVHVVKDFDRVIDEFRSTAPDLVLLDINLPSFDGYYWCRQIRQES-ICPVLFISARTGEMDQVMALENGGDDFITKPFHAEIVMAKI-
>LVISKB_0038_HK_Classic|Lactobacillus_brevis_KB290|Pair_LVISKB_0037|HisKA_378-444/LVISKB_0037_RR_OmpR|Lactobacillus_brevis_KB290|Pair_LVISKB_0038|Response_reg_32-141	-RREFVSNVSHELRTPLTSVRSYIEALSEDPKVAPDFLKVTQEETDRMIRMINDLLTLSRMDSGILVVDDEKPISDIMKFNLEKEGY-EVAVAYDGEAAVQAVEEDVPDLVILDLMLPKIDGLEVAREIRKKH-DMPIIMVTAKDSELDKVLGLELGADDYVTKPFSNRELVARVK
>LVISKB_0322_HK_Classic|Lactobacillus_brevis_KB290|Pair_LVISKB_0323|HisKA_237-300/LVISKB_0323_RR_OmpR|Lactobacillus_brevis_KB290|Pair_LVISKB_0322|Response_reg_5-116	--RQFISDASHELRTPIATIRGNLKLIERHPEIIPESLGFIDQESLRMQHLIENLLHLSRAD--ILLVEDEEGLASYVAKELTFEDF-DVLTATDGAAAWEIYQQKKLLLVLLDWMLPKMDGMEVLRRIRKHD-ELPVIMMTARDYLGDKVTGLDNGADDYITKPFEIEELLARIR
>LVISKB_0366_HK_Classic|Lactobacillus_brevis_KB290|Pair_LVISKB_0365|HisKA_228-295/LVISKB_0365_RR_OmpR|Lactobacillus_brevis_KB290|Pair_LVISKB_0366|Response_reg_19-126	-QTEFVGNAAHELRTPLTIIQNKLELLLTKIIDQAENIAIANSESQRLQKLTQDLLALARSDS-VLVVEDEKALSADIVELIE-PIC-ETTTAFDGEQGEFLASQGVFDAIILDLMLPGESGLDLLLHIRNQGVKTPVLILTAKDTIADKLRGFNDGADDYVTKPFHREELLARM-
>LVISKB_0644_HK_Classic|Lactobacillus_brevis_KB290|Pair_LVISKB_0643|HisKA_224-291/LVISKB_0643_RR_OmpR|Lactobacillus_brevis_KB290|Pair_LVISKB_0644|Response_reg_17-125	-QMDFMSNASHELKTPVTAISGFAKTLLADPEKSVEFLQIIDQQSERLVELINDVLTISHIESGVLVVDDEPAIVTLLQYNLEQADY-QVVTAIDGEQALNLALHEKFDVILLDLMLPKMDGVEVTKRLRQEKVKTPIIMITAKTSEFDTVFGLELGADDYITKPFSPREVIARM-
>LVISKB_0751_HK_Classic|Lactobacillus_brevis_KB290|Pair_LVISKB_0750|HisKA_255-321/LVISKB_0750_RR_OmpR|Lactobacillus_brevis_KB290|Pair_LVISKB_0751|Response_reg_21-133	-RREFMANASHEMRTPLTTINGLLEGLAYPEESKEESIELMRSETSRLIRLVNENLDYEKIRS--LMIEDNHSVSQMMSMFFKKEQW-DAEFAYDGNEAVEMFSANPWDMVTLDLNLPGMDGMQVSAEIRKLSPTVPIIMLTARDSESDQVLGLEMGADDYVTKPFSPITLIARIK
>LVISKB_0953_HK_Classic|Lactobacillus_brevis_KB290|Pair_LVISKB_0952|HisKA_273-339/LVISKB_0952_RR_OmpR|Lactobacillus_brevis_KB290|Pair_LVISKB_0953|Response_reg_4-113	-QQQFVEDVSHELRTPVAIIQGHMEMLDRDPEVLDESIKASLQETKRMKSLVQEMLDLQRAEQ-ILIIEDEKNLARFVELELKHEGY-ETNVQFNGRTGLDAALSQDFDVILLDLMLPELNGIEVARRVREVK-STPIIMMTARDSVIDRVSGLDHGADDYIVKPFAIEELLARVR
>LVISKB_2041_HK_Classic|Lactobacillus_brevis_KB290|Pair_LVISKB_2042|HisKA_155-221/LVISKB_2042_RR_OmpR|Lactobacillus_brevis_KB290|Pair_LVISKB_2041|Response_reg_3-113	SKDELITNVSHDIRTPLTSIIGYLGLIEDSQADLLKYTHTAFLKSKQMKSLVEDLFEYTKV---ILVVDDDKEIAQLLEIYIKNEGY-EPITAYNGKEALTKLHTTPIALMILDIMMPEMSGIEVVKEVRKDS-QIPILILSAKTGDMDKIQGLITGADDYVTKPFNPLEVMARV-
>Ssed_0126_HK_Classic|Shewanella_sediminis_HAW-EB3|Pair_Ssed_0125|HisKA_467-530/Ssed_0125_RR_NtrC|Shewanella_sediminis_HAW-EB3|Pair_Ssed_0126|Response_reg_34-144	ALGELTAGIAHEINNPTAVILGNMELMKYRAEDVEEEIDLVIQQVGRISTIIRSLLQYSRPG--VLIVDDEPGMRSFLKKALSKK-FALVETASSVEDAEQLRSRCHFDLLVVDIRLPGRSGIEWHEALNDQERRSDIIFMTGYADMDVAIKALRAGASDFIMKPFHLEQMMKAV-
>Ssed_0167_HK_Classic|Shewanella_sediminis_HAW-EB3|Pair_Ssed_0168|HisKA_232-291/Ssed_0168_RR_OmpR|Shewanella_sediminis_HAW-EB3|Pair_Ssed_0167|Response_reg_8-118	---LLMAGISHDLRTPLTRIRLASEMMV---EEDEYLKDGIVHDIEDMDAIINQFISYIRQD--ILVVDDDMRLRALLERYLMEQGY-QVRSAANSEQMDRLLERENFHLLVLDLMLPGEDGLSICRRLRQTGNPIPIVMLTAKGDEVDRIIGLELGADDYLPKPFNPRELLARIK
>Ssed_0278_HK_Classic|Shewanella_sediminis_HAW-EB3|Pair_Ssed_0279|HisKA_240-298/Ssed_0279_RR_OmpR|Shewanella_sediminis_HAW-EB3|Pair_Ssed_0278|Response_reg_4-113	SQQRLISDISHELRTPLTRLQLALALARKK-GQESAETERIGYEAEQLEKMISELLELSKV---ILLIDDDLGLSELLAQLLELEGF-ELTLAHDGQEGLKLALEKQFDLILLDVMLPKLNGFEVLKALRVSK-QTPVLMLTARGDEIDRVVGLEIGADDYLPKPFNDRELVARIK
>Ssed_0283_HK_Classic|Shewanella_sediminis_HAW-EB3|Pair_Ssed_0282|HisKA_130-183/Ssed_0282_RR_NtrC|Shewanella_sediminis_HAW-EB3|Pair_Ssed_0283|Response_reg_9-117	---YLVRNLAHEIKNPLGGLRGAAQLLSRHDPQLNEFTDLIIEQADRLRNLVDRLLGPQR----VWVLDDDSSIRWVVERALKGASI-TSASFAAAESLWEALELAQPKVIISDIRMPGTDGLSLLERIQVHYPHIPVIIMTAHSDLDSAVSAYQAGAFEYLPKPFDIDEAIALV-
>Ssed_0692_HK_Classic|Shewanella_sediminis_HAW-EB3|Pair_Ssed_0691|HisKA_221-272/Ssed_0691_RR_OmpR|Shewanella_sediminis_HAW-EB3|Pair_Ssed_0692|Response_reg_3-113	----FLRFASHELRTPIAICQSSFDILTL--QQGKLTGPTLHASQAQMKSITETLL--------VLLVEDNRLLAKNIIHYLELNEI-ECDYAETLAQAELAIFSRTFDAIILDLNLPDGDGITACKKWKEQRIISPIIMLTARSNLQDRLSGFEVGADDYLVKPFAMAELVARL-
>Ssed_0711_HK_Classic|Shewanella_sediminis_HAW-EB3|Pair_Ssed_0712|HisKA_224-288/Ssed_0712_RR_OmpR|Shewanella_sediminis_HAW-EB3|Pair_Ssed_0711|Response_reg_6-115	--QAFARYASHELRTPLTVIQGATWLLKQEPEYQARQRERIAKAATDMQHTIEALLSLVKQEQ--LIVEDNPDVAGILADFFESQGT-EVDFAANGELGYKLALDGCFDLIILDLMLPKMDGLTVAKKLRQMGCTTPILMLTALDDKQDLLNGFASGADDYLAKPFDLDVLNARV-
>Ssed_0740_HK_Classic|Shewanella_sediminis_HAW-EB3|Pair_Ssed_0741|HisKA_249-312/Ssed_0741_RR_ArsR|Shewanella_sediminis_HAW-EB3|Pair_Ssed_0740|Response_reg_4-114	--GHLAMGMAHEINNPLASSTLALDIFQRLDEQQLKYIERISLGIERASEISKELLAYARP---VLIAEDDEDLRTNMVDILELEGF-DVIAVPSAEEAILACQTHSFDIALMDLVMSGMTGVEAISNLRQENPFMAVVIVTAYATVDTAVDAMKKGADSVLTKPFKSVDLVMTI-
>Ssed_0980_HK_Classic|Shewanella_sediminis_HAW-EB3|Pair_Ssed_0981|HisKA_201-269/Ssed_0981_RR_OmpR|Shewanella_sediminis_HAW-EB3|Pair_Ssed_0980|Response_reg_10-119	----LSNAVSHEIRTPLARLKFALALMPQDSDVQRRFLNDMQQDVKEMENLLQELLTYASLES-VLLVEDDIRLANLIVDYLKSHGM-HVEVERRGDTVLTRLISYKPDIILLDIMLPGMDGLTLCEKLPDYF-AGPILLMSALGSNEDQIKGLELGADDYVVKPVDPALLIARIN
>Ssed_1031_HK_Classic|Shewanella_sediminis_HAW-EB3|Pair_Ssed_1032|HisKA_212-274/Ssed_1032_RR_OmpR|Shewanella_sediminis_HAW-EB3|Pair_Ssed_1031|Response_reg_7-116	-QRDLLHGVAHEFRSPLARMEFAIELLEEDENKRSQLKGQLERSIKELDELVKQVLRYSRLQH-VLLIDDDIELCELVRDYLIQNDY-RVSVLNDGLNAAKEILSQNPHIVILDLMLPHVDGLTICKQVREDY-HGSIIMLTALDDDIDEVTGLEVGADDYLAKPVKPRVLLAHI-
>Ssed_1797_HK_Classic|Shewanella_sediminis_HAW-EB3|Pair_Ssed_1798|HisKA_308-371/Ssed_1798_RR_NtrC|Shewanella_sediminis_HAW-EB3|Pair_Ssed_1797|Response_reg_8-118	-LGEVTRGIAHSLRNPLHTVGLLSDGVADSAEERSQLILKIQQKISMMDKSIQSLLTLSSNE--ILVVEDEPDQRSLITKMLAANGY-QVSSASSVEEAIVMIKSDLPDLVFSDWKLGQLSGMDLLIYVRREHPDMGFIIATAYGTITHAVDAMQAGADDYLAKPYQRQSLLLAI-
>Ssed_1973_HK_Classic|Shewanella_sediminis_HAW-EB3|Pair_Ssed_1974|HisKA_224-289/Ssed_1974_RR_OmpR|Shewanella_sediminis_HAW-EB3|Pair_Ssed_1973|Response_reg_4-114	---DFLRYASHELRTPIAVMRTNIELLTKASDKQVTVLKRIDRASMTIGHLTEVLLWLGRDDS--LLVEDDIDLATAVIEYLEMESI-QCDSAYNGLTGMNLIENNDYQVIILDLNLPKMDGLEVCKKMRELGDDTPVLMLTARDSLNDKVAGFNAGTDDYLVKPFAMEELIVRI-
>Ssed_2281_HK_Classic|Shewanella_sediminis_HAW-EB3|Pair_Ssed_2282|HisKA_343-402/Ssed_2282_RR_NarL|Shewanella_sediminis_HAW-EB3|Pair_Ssed_2281|Response_reg_4-109	--GEMASGIAHELNQPLAGIRYLTQGCLYLTPEQGEALNKAIEQVDRAQSTIKRFRQF------IYLVDDDQDVLNSLSWMLDGLGL-KTQGFLNAASFLSAVDITRPGIAILDIQMPGMDGIALLHHIKVAASPMSVIMLTGHGTITMAVQAIQQGAIDFLEKPVDGDKLS----
>Ssed_2495_HK_Classic|Shewanella_sediminis_HAW-EB3|Pair_Ssed_2494|HisKA_499-562/Ssed_2494_RR_OmpR|Shewanella_sediminis_HAW-EB3|Pair_Ssed_2495|Response_reg_6-117	--ENMSSRLSHELRTPVAVVRSSLEHLQQLDKDSRKYVDRAQEGVSRLSMILNNMSEATRLEE-IAIVEDEAAIRENYKEVLQQQGY-SVQAYPNRPTAMQAFCTRLPDLAIIDIGLEDDGGFTLCQSLRALSSNLPIIFLTARDSDFDTVCGLRLGADDYLSKDVSFPHLIARL-
>Ssed_2589_HK_Classic|Shewanella_sediminis_HAW-EB3|Pair_Ssed_2590|HisKA_278-340/Ssed_2590_RR_OmpR|Shewanella_sediminis_HAW-EB3|Pair_Ssed_2589|Response_reg_9-118	ARQQWIADISHELRTPVAILQGELEALQDIRDYSAESVNSLYQEVKRLAFLINDLHELSMSD--ILIVEDELKLAQLLADYLCDSSF-EPHQLHRGDEVLGWLASHPCDLILLDLMLPGLDGLEVCKQIRQHS-NIPIIMITARVEEIDRLLGLELGADDYICKPFSPREVVARV-
>Ssed_2720_HK_Classic|Shewanella_sediminis_HAW-EB3|Pair_Ssed_2721|HisKA_221-282/Ssed_2721_RR_OmpR|Shewanella_sediminis_HAW-EB3|Pair_Ssed_2720|Response_reg_10-119	----FTRDVSHELRTPVAIVKNAVELYKEITDESHRLIDRIADATIQMEQTVTTLLVLAREEH-ILLVEDQLSVARNISEYMEEKGH-VFDFTGQGQHGLDLALENYYDLIILDLNLPVMDGLEVCQQIRAKSRHIPILMLTARDSIEDKVSGFTAGADDYLTKPFSLQELE----
>Ssed_2911_HK_Classic|Shewanella_sediminis_HAW-EB3|Pair_Ssed_2912|HisKA_379-443/Ssed_2912_RR_NtrC|Shewanella_sediminis_HAW-EB3|Pair_Ssed_2911|Response_reg_11-121	--GSLSASINHEINQPLAAIRSYAQNTQTL-EQVSDNINTIISLTDRLAAIVGQFKSFTRKSQ-VLIVDDEPLIGSALMQLFELEGI-PAFATSTPKSLPEQIHLNWPGVVITDVNMPQLDGISLMRNLQTKDKDLPIILLTGFGDIAMAVQALKQGAYDFLEKPFNNEHILDVV-
>Ssed_3069_HK_Classic|Shewanella_sediminis_HAW-EB3|Pair_Ssed_3068|HisKA_136-202/Ssed_3068_RR_NtrC|Shewanella_sediminis_HAW-EB3|Pair_Ssed_3069|Response_reg_6-114	ALGKMVATLAHQVRTPLTAALLYASNLASSESARSRFQKKLVDRLNELEHQVNDMLLMAKGR--ILLVEDDHSLREALLDTLLLAQY-ECTDVSSAEEAIIKLKGESFDMVISDVQMEGIGGIGLLNYLHQHT-QIPVLLMTAYATIDNAVNAIKLGAVDYLAKPFAPEVLLNQV-
>Ssed_3281_HK_Classic|Shewanella_sediminis_HAW-EB3|Pair_Ssed_3280|HisKA_241-301/Ssed_3280_RR_OmpR|Shewanella_sediminis_HAW-EB3|Pair_Ssed_3281|Response_reg_6-115	----FAQAVPHEMRTPLSRIQLATGLLRKQQADERELLDNIDCYIDDIDELTRQVLTFSKLNT-ILIIEDDKEISRLTAMYLEAEDY-LTQIIDDGLHAVNAVRQHQPDLIILDLMLPGLDGIEICKQVRTFH-TGPILVLTACADDMSEVSLLKLGADDYLTKPVRPHVMVARI-
>Ssed_3302_HK_Classic|Shewanella_sediminis_HAW-EB3|Pair_Ssed_3303|HisKA_205-270/Ssed_3303_RR_OmpR|Shewanella_sediminis_HAW-EB3|Pair_Ssed_3302|Response_reg_5-117	MRKDFVANVSHELKTPLTVLQGYLEMMQGPGSPNIKAVEQMQQQTNRMRSMVEQLLVLSRIE--ILIVEDELAIREMLTFVLEQHGF-TTTAAEDFDSALEMLSEPYPDLILLDWMFPGGSGIQLAKRLRQDERQIPIIMLTARGEEEDKVRGLEVGADDYITKPFSPKELVARIK
>Ssed_3718_HK_Classic|Shewanella_sediminis_HAW-EB3|Pair_Ssed_3719|HisKA_248-302/Ssed_3719_RR_NtrC|Shewanella_sediminis_HAW-EB3|Pair_Ssed_3718|Response_reg_4-119	----VIRIISHELNNSVAPIASMVNSGRMNDPKLKMIFDTIEDRTNHLSQFIFNYARFAK----ILIVDDNQAVCNALALMLELHGY-QPLTCLSPDTALELIHLHDISLVIQDMNFTQDEGKALFYAIRGLQPELPIILLTAWTQLEIAVELVKEGAADYMGKPWEDAKLLTSI-
>Ssed_3876_HK_Classic|Shewanella_sediminis_HAW-EB3|Pair_Ssed_3875|HisKA_239-296/Ssed_3875_RR_OmpR|Shewanella_sediminis_HAW-EB3|Pair_Ssed_3876|Response_reg_3-112	------GNLSHGLKTPLAVMQQQVEALKDAAIALQKQLDLVHKMIER------------------LLVEDNALLVEELEKQLKQAGY-VTDVTDKAAEADYLLKETNYDCVILDIGLPDGNGLELLERWRNQGINTPVIMLTARSQWHEKVEGFNAGADDYLGKPFHTQELLARI-
>Ssed_3878_HK_Classic|Shewanella_sediminis_HAW-EB3|Pair_Ssed_3879|HisKA_443-529/Ssed_3879_RR_NtrC|Shewanella_sediminis_HAW-EB3|Pair_Ssed_3878|Response_reg_7-114	SLGELSAGIAHEINNPTGIIIHSVAFLNDL-HELHYSCLNIDEGATRISRIVNDLKRYA-----ILLVDDEASWLRTLAVTLNVPEA-QVDTCVDSRQVVNRLSVGDYALVLLDLTMPFHSGEELLEMIRCDFPKTRVIIVTGVNEVDTAVRCIKNGAYDYFIKTDNVDDLARTV-
>Ssed_4066_HK_Classic|Shewanella_sediminis_HAW-EB3|Pair_Ssed_4067|HisKA_382-445/Ssed_4067_RR_NarL|Shewanella_sediminis_HAW-EB3|Pair_Ssed_4066|Response_reg_9-117	--GEIGSGLAHELNQPIAAITQYSEGGMMADAETYEILAKINAQSLRAGAVVHRIRGL--------LVDDDIAILDSLSFMLGQFGY-NITAFNNGDDFLNTVPLERPACVILDSRMPEVSGQEVQQKLLEIDSPLGIIFLTGHGDMPMAVDAFRKGACDFFQKPVSGKALSCA--
>Ssed_4391_HK_Classic|Shewanella_sediminis_HAW-EB3|Pair_Ssed_4392|HisKA_204-261/Ssed_4392_RR_OmpR|Shewanella_sediminis_HAW-EB3|Pair_Ssed_4391|Response_reg_3-113	------DNIAHDLRTPLSHLRIGLEQLPDSCEELPEACAILTEKLDHCLATFDAMLSLTRIEEGILLVEDDATTIEYVVKGFMEQGH-NIETASDGHQGLLLATSMKYDLVILDRMLPQLDGLKLLAALRATGSQTPVLILSALSHVDERVKGLRAGGDDYMTKPFAFSELLVR--
>Ssed_4409_HK_Classic|Shewanella_sediminis_HAW-EB3|Pair_Ssed_4408|HisKA_212-275/Ssed_4408_RR_OmpR|Shewanella_sediminis_HAW-EB3|Pair_Ssed_4409|Response_reg_19-126	-NRNLTNAVAHEFRTPIFRIQCNLDMLDDVRPDQMPHLEGIQSDLNELNSMVEELLHFSKLE---VLVEDDEKISELLSCYLERQNI-RVTCVNDGADAVATIIDKQPDIVILDLMLPNVDGFTICRQIQPQY-SGKLLFLTASEDDMDQVAALEMGADDFVVKPVQPRVLLARL-
>EFD32_0307_HK_Classic|Enterococcus_faecalis_D32|Pair_EFD32_0306|HisKA_266-330/EFD32_0306_RR_OmpR|Enterococcus_faecalis_D32|Pair_EFD32_0307|Response_reg_5-114	-RKELIANISHDLKTPITSIIGYVEGLMDTEEKKQRYLTVIHEKSLGLNDLIEELFLYSKLD--VLIIEDDPSIADLQKDYLEINDM-TVTIEHDGKKGLEAALNEPFDLIILDVMLPTMDGFEICRAIRKKK-QTPIMIVSAKKEDIDKIRGLGLGADDYIIKPFSPNELVARA-
>EFD32_0738_HK_Classic|Enterococcus_faecalis_D32|Pair_EFD32_0737|HisKA_119-178/EFD32_0737_RR_OmpR|Enterococcus_faecalis_D32|Pair_EFD32_0738|Response_reg_4-113	-----IDSWVHEIKVPLAAITLLVQSVED--DIPEKKYYLLENELGKIDEYVEQVLYYARLDS-IMIVEDETTIRELISEELQKWQFETI-GTTDFNDVLDDFQEENPQLVLMDINLPVYDGYYWCQKIREVS-KVPIIFISSRSTNMDMIMAMNMGADDFVTKPFQIDVLIAKIN
>EFD32_0864_HK_Classic|Enterococcus_faecalis_D32|Pair_EFD32_0863|HisKA_270-336/EFD32_0863_RR_OmpR|Enterococcus_faecalis_D32|Pair_EFD32_0864|Response_reg_4-113	-QEQFVEDVSHELRTPVAIMEGHLNLLNRDPEILDESLKASLQEISRMKSLVQEMLDLSRAEQ-ILIIEDEKNLARFVELELKHEGY-TTEVHYNGRTGLEAALNNEWDAILLDLMLPELNGLEVCRRVRQVK-NTPIIMMTARDSVIDRVSGLDHGADDYIVKPFAIEELLARL-
>EFD32_0996_HK_Classic|Enterococcus_faecalis_D32|Pair_EFD32_0995|HisKA_375-442/EFD32_0995_RR_OmpR|Enterococcus_faecalis_D32|Pair_EFD32_0996|Response_reg_4-113	-RREFVSNVSHELRTPLTSMRSYIEALSENPEIAPNFLKVTLEETDRMIRMINDLLNLSRMDSGILVVDDEKPISEIVKYNLVKEGY-EVFTAYDGEEALEKVEEVEPDLIILDLMLPKMDGLEVAREVRKTH-DMPIIMVTAKDSEIDKVLGLELGADDYVTKPFSNRELVARVK
>EFD32_1063_HK_Classic|Enterococcus_faecalis_D32|Pair_EFD32_1062|HisKA_262-328/EFD32_1062_RR_OmpR|Enterococcus_faecalis_D32|Pair_EFD32_1063|Response_reg_3-113	-RRQFMADASHEMRTPLTTINGLLEGLQYP-ENQKEAIKLMQNETARLIRLVNENLDYEKIRT-ILMIEDNESVSEMMQMFFLNEGW-EATFKDDGKEGLATFSPEKWDMITLDLNLPSMDGMAVCREIRKVSANVPIIMLTARDSESDQVIGLEMGADDYVTKPFSPLTLIARM-
>EFD32_1438_HK_Classic|Enterococcus_faecalis_D32|Pair_EFD32_1437|HisKA_365-428/EFD32_1437_RR_OmpR|Enterococcus_faecalis_D32|Pair_EFD32_1438|Response_reg_4-112	-QKDFVSNVSHELKTPVTSLLGFTETLIDDPEVLNQFLHIMQKDAQRLQQLIQEILELSRGS--VLVVDDEPSILTLLTFNLEKEGY-QVTTSEDGKNGFELALSNQYDFIILDVMLPGMDGLEITKALRREKIDTPILILTAKDEQVDKIIGLEIGADDYLTKPFSPREVLARM-
>EFD32_2463_HK_Classic|Enterococcus_faecalis_D32|Pair_EFD32_2464|HisKA_146-209/EFD32_2464_RR_OmpR|Enterococcus_faecalis_D32|Pair_EFD32_2463|Response_reg_5-114	-KNDLIVYLAHDLKTPLTSVIGYLTLLHDSTQLREKYLAISLEKAEHLEELINEFFEIAR----ILLVDDEQEIADLLEVYLTSDGY-EVEKFYRGKPALESMANNQFDLAVLDVMLPDIDGFQMVKKAREKY-FFPIILLTAKIEDIDKITGLTLGADDYITKPFNPLEVVARI-
>EFD32_2842_HK_Classic|Enterococcus_faecalis_D32|Pair_EFD32_2841|HisKA_162-229/EFD32_2841_RR_OmpR|Enterococcus_faecalis_D32|Pair_EFD32_2842|Response_reg_3-113	SKDELITNVSHDIRTPLTSIIGYLGLIEDSQEDLLKYTHTAYVKAKQMKLLVDDLFEYTKV---ILVADDDKEIVELLSIYIHNEGY-EVVKAYDGKEALSKLHTTPIDLLILDIMMPIMDGMEVVKELRKES-QIPIIMLTAKTTDMDKIKGLVAGADDYVTKPFNPLEVMARV-
>BM590_A0623_HK_Classic|Brucella_melitensis_M5-90|Pair_BM590_A0622|HisKA_228-283/BM590_A0622_RR_OmpR|Brucella_melitensis_M5-90|Pair_BM590_A0623|Response_reg_3-113	---TQVGNLAHSLKTPLSVLVNEARAMGGM-----QYLQRARIAA-------------------ILIVEDDKDLNRQLSEAMIAAGY-VVDSAYDGEEGHYLGDTEPYDAVVLDIGLPQMDGISVVERWRRSGRTIPVLMLTARDRWSDKVAGIDAGADDYVAKPFHIEEVLTRL-
>MADE_1001530_HK_Classic|Alteromonas_macleodii_str._Deep_ecotype|Pair_MADE_1001535|HisKA_249-315/MADE_1001535_RR_OmpR|Alteromonas_macleodii_str._Deep_ecotype|Pair_MADE_1001530|Response_reg_3-113	-LSYFSADIAHELRTPVTNLTTQTQVILNQPRTESEYVDILYSNLERMTKMVSDMLLLAKTEHGILVVEDEVKTGDYIKQGLIESGF-VVELVRTGLDGHHKSMIGDYELIVLDVMLPDIEGWKILSSLRESGKFTPVLFLTARDHVNDRVKGLELGADDYLVKPFAFAELLARVR
>MADE_1001875_HK_Classic|Alteromonas_macleodii_str._Deep_ecotype|Pair_MADE_1001870|HisKA_259-319/MADE_1001870_RR_OmpR|Alteromonas_macleodii_str._Deep_ecotype|Pair_MADE_1001875|Response_reg_5-98	--KRLTSDIAHELKTPVSELINMTEVAIKL---EKDFKPRVLQIGTRMKNIIS----------------------------LEKLGY-SVDTAGTGSEGLSMALLGSYEIIILDMMLPELDGMTILKTLRKRHLETKVIILSARSESEDKVAGLLAGADDYLSKPFSFDELTARL-
>MADE_1004125_HK_Classic|Alteromonas_macleodii_str._Deep_ecotype|Pair_MADE_1004130|HisKA_212-269/MADE_1004130_RR_OmpR|Alteromonas_macleodii_str._Deep_ecotype|Pair_MADE_1004125|Response_reg_3-113	--QQFASNAAHELRTPLSVMKINIHNIANELGEKGEALKTLKADTDRMIHAVNQFLLLTR----ILLVEDDRPLSDALALSLKNANY-AVDCVYTGADAMTTLSIGQTDIVVLDLGLPDTDGLNVLKSIRKKNATLPVLILTARDKVSDKISGLDAGADDYLPKPFEIDELLARL-
>MADE_1005885_HK_Classic|Alteromonas_macleodii_str._Deep_ecotype|Pair_MADE_1005890|HisKA_153-219/MADE_1005890_RR_NtrC|Alteromonas_macleodii_str._Deep_ecotype|Pair_MADE_1005885|Response_reg_6-115	SLGKMVASLAHQIRTPLSAAMLYASNLTRGQEAQTQFANKLTDRLKELESQVNDMLLFAKSGE-ILIVEDDAGLREALLDTLLLGNY-NVVEADCAEQALMMLSMQAIDLVVSDIQMGEMSGLTLLKSIKAKYPNMPVLLMTAYATVNDAVQAMRDGATDYLSKPFAPEVLLNL--
>MADE_1006850_HK_Classic|Alteromonas_macleodii_str._Deep_ecotype|Pair_MADE_1006855|HisKA_248-288/MADE_1006855_RR_OmpR|Alteromonas_macleodii_str._Deep_ecotype|Pair_MADE_1006850|Response_reg_3-111	-----LGDLAHSLKTPLAVASGHKTLPSEVGEALRQIDNIIKRQLKRA----------------ILVAEDDSRLLTQLDALLQQNGY-SVDLADNGEHALFLIKEYDYDLAIVDIGMPKLDGFEVIRKARQADISCPILILTARDRWQEKVEGLDAGADDYLTKPFHNEELLART-
>MADE_1014065_HK_Classic|Alteromonas_macleodii_str._Deep_ecotype|Pair_MADE_1014060|HisKA_234-295/MADE_1014060_RR_OmpR|Alteromonas_macleodii_str._Deep_ecotype|Pair_MADE_1014065|Response_reg_8-118	-QQRLLHDVSHELRAPLARLQASAALIEQ-NQPDNRHVKQIHNDCHRIDQLIQQILNFSTLEN-VLLVDDDVDLCALLSEFLEGDGF-SVHAIHSGEEAVNTLNSNQYDTVVLDIMMPGMSGLDVLRAVRAEK-QTPILMLTGRGDDIDRIVGLEMGADDYLPKPCNPRELGARI-
>MADE_1015995_HK_Classic|Alteromonas_macleodii_str._Deep_ecotype|Pair_MADE_1016000|HisKA_134-188/MADE_1016000_RR_NtrC|Alteromonas_macleodii_str._Deep_ecotype|Pair_MADE_1015995|Response_reg_8-111	--RELVRGLAHEIKNPLGGIRGAAQLLEKLSEEHKEFTRMIIEQSDRLRNLVDRLLG-------VWIVDDDSSIRWVLQKALQAADI-SCLSFENPEDLLLQLQSGQPEVIISDIRMPQMDGMALLNEVHASHPMLPVIIMTAHSDLDSAVNAYQKGAFEYLPKPFDIDEAVT---
>MADE_1017455_HK_Classic|Alteromonas_macleodii_str._Deep_ecotype|Pair_MADE_1017460|HisKA_499-562/MADE_1017460_RR_OmpR|Alteromonas_macleodii_str._Deep_ecotype|Pair_MADE_1017455|Response_reg_5-116	--ENMASRLSHELRTPIAVVKSSLDMLSHDTSQQAVFVERAQSGVNRLSTILNSMSEATRLEQ-IALVEDDAAIRENYIMALKAQGY-SVNAYEDRPSAAEAFNHTLPDLAIIDIGLKDEGGFMLCQQLRGLSQTLPIIFFTARDNDVDTISGLRMGADDYLTKDISMAHLLARI-
>Acid_0070_HK_Classic|Candidatus_Solibacter_usitatus_Ellin6076|Pair_Acid_0071|HisKA_277-340/Acid_0071_RR_OmpR|Candidatus_Solibacter_usitatus_Ellin6076|Pair_Acid_0070|Response_reg_6-115	-KSALLDSLAHDIKTPLTSIKAAVTSLLSSAAADQELLTIINEEADRLNQLAAEVIAMARVEAGILVVDDDPQIRRVMKATLVGHSY-EVIEARTGEDALEALPHEMPNLVLLDMNMPGMGGLETCRAIRSGT-DIPVIILSVRNTEKDKVAALDAGADDYVTKPFGIEELLARIR
>Acid_1102_HK_Classic|Candidatus_Solibacter_usitatus_Ellin6076|Pair_Acid_1101|HisKA_330-394/Acid_1101_RR_OmpR|Candidatus_Solibacter_usitatus_Ellin6076|Pair_Acid_1102|Response_reg_5-115	---EFVSGVSHELRTPLAVIGSAADNLADSDAQVRRYGALIRGEGRRLTEMVEQVLSYASLQSGILLAEDDPGLVLTLTDRLQNEGY-AVESRQDGDSALAEAMGQSYDLILLDVMLPRRSGFDVCKKLRESEIGVPILMLTARGEVVDKVVGLKSGADDYLTKPFEMMELLARIE
>Acid_1646_HK_Classic|Candidatus_Solibacter_usitatus_Ellin6076|Pair_Acid_1645|HisKA_750-812/Acid_1645_RR_NtrC|Candidatus_Solibacter_usitatus_Ellin6076|Pair_Acid_1646|Response_reg_15-126	--GLLAAGVAHEVNTPLAVISTYAQMLAKEDSQKSLILEKIAKQTFRASEIVNSLLNFSRT---ILVIDDELDIREGLHDLLTEGGY-IVELAHNGGEGLQKLEGASYDLVLLDLMMPDMSGMDVLQQVRTRDRETPIFMITAYGSVEAAVDALKLGANDYFSKPWDNEKLLIE--
>Acid_1851_HK_Classic|Candidatus_Solibacter_usitatus_Ellin6076|Pair_Acid_1852|HisKA_408-466/Acid_1852_RR_NtrC|Candidatus_Solibacter_usitatus_Ellin6076|Pair_Acid_1851|Response_reg_4-114	------HFVTHEMRTPLSAIQGSSELISRLTEEKRQQIALINSESKRLARMVEIFLNVERLSAGILLVEDDPALQFTIQTFLEANGY-AVDAVSTTDDAADRINENSYPIIVSDIYIDQRTGLFVLDAAKSKDEKCAVIIMSGRGTIETAVAATRGGAFDYIAKPFELDALLEVI-
>Acid_1921_HK_Classic|Candidatus_Solibacter_usitatus_Ellin6076|Pair_Acid_1922|HisKA_167-230/Acid_1922_RR_NtrC|Candidatus_Solibacter_usitatus_Ellin6076|Pair_Acid_1921|Response_reg_5-113	ALGQLTAGLAHELRNPLGTIKASAEMLNQENEVAREVAGFISTEVDRTNSLVTRFLQFAR----ILVVEDEEKLRRVIELQLLSAGF-DVDKAASAEEGLKIVDRA--DMVLTDLKLPNMDGQEFLSLIRRQNSHVPVVMMTAFGNVETAVEAMKAGATDFLLKPFSLDHLMQVV-
>Acid_2165_HK_Classic|Candidatus_Solibacter_usitatus_Ellin6076|Pair_Acid_2164|HisKA_275-341/Acid_2164_RR_OmpR|Candidatus_Solibacter_usitatus_Ellin6076|Pair_Acid_2165|Response_reg_3-113	--RQFSTDVSHELRTPITGIRGQLEVATATTDQYREAMFNSLQDIDRLSQIVRALLLLSQAESGILVVEDEKRIADFLCRGLEGAGY-AVDAALTGGAALDLIHDTDYDLVVLDRMLPDMDGLQVLEKMRSRKAGPPVLILSARGALDDRVKGLEQGADDYLVKPFAFVELLARV-
>Acid_2402_HK_Classic|Candidatus_Solibacter_usitatus_Ellin6076|Pair_Acid_2403|HisKA_76-137/Acid_2403_RR_OmpR|Candidatus_Solibacter_usitatus_Ellin6076|Pair_Acid_2402|Response_reg_4-116	---AFINAVTHELKTPVASIRLYLETLQTDEAKRKEFYKIMLDDSDRLLSTIEQVLRTGRVGS-ILVVEDELHLAEGLRFNLEAEGY-QVEVVETGEAALERLGEPRFDVVVLDVMLPGKDGFTVMSEMRHAGQFIPTLMLTARGHAEDILHGFAAGADDYLTKPFELAILIARI-
>Acid_3414_HK_Classic|Candidatus_Solibacter_usitatus_Ellin6076|Pair_Acid_3413|HisKA_460-526/Acid_3413_RR_NtrC|Candidatus_Solibacter_usitatus_Ellin6076|Pair_Acid_3414|Response_reg_6-112	----VARRVAHEIKNPLTPIALSAERIGRLPPGAARCAETISKSVESVKTLVDEFSQFAR----VLVVDDEPAIRQSLSGVLEDEGY-AVESAESGEACLEALPAGNFELVLLDIWLPGMDGMEVLSRIQEIPERPVVVVISGHGSIEAAVKATKLGAFDFLEKPLSIEKV-----
>Acid_3635_HK_Classic|Candidatus_Solibacter_usitatus_Ellin6076|Pair_Acid_3636|HisKA_213-273/Acid_3636_RR_OmpR|Candidatus_Solibacter_usitatus_Ellin6076|Pair_Acid_3635|Response_reg_27-136	-ERRLLQDISHELRSPLARLSFAAELART-AENRGAAIDRLNKEIARLTDLVGGLIQVTRVEG-ILLVEDDTELTSLMTDYFAQHGF-QVEAAHDGRTGLARAIEGSFDLIILDVMLPVLDGFEVLRQLRKRS-ATPVIMLTARISQSDRVAGLNSGADDYLPKPFGPDELLARIR
>Acid_4206_HK_Classic|Candidatus_Solibacter_usitatus_Ellin6076|Pair_Acid_4207|HisKA_300-367/Acid_4207_RR_NtrC|Candidatus_Solibacter_usitatus_Ellin6076|Pair_Acid_4206|Response_reg_17-126	-IGKLAATVAHEINNPLFGILTYARLVLRGRDEMAEQLQTIERESKRCGDLVKNLLSFSRQ---ILIVDDELVVRDSLGKWFSSEGY-SARPVGGAREALEVIQHGEFDIALLDIKMPGMDGMELQARLREADSDLTIIMMTGYSSVETAVQALKQGAYDYITKPVDPDELSHL--
>Acid_4321_HK_Classic|Candidatus_Solibacter_usitatus_Ellin6076|Pair_Acid_4320|HisKA_380-447/Acid_4320_RR_OmpR|Candidatus_Solibacter_usitatus_Ellin6076|Pair_Acid_4321|Response_reg_4-114	MQSDFVSAVSHEFRSPLTSIRHLSEILELPSEERRQYYSTLVRETRRLQRLVEALLNFGRMEAGILVVEDEPGIALGLEDDLTIEGY-DVEVARDGVTAARRGREGNFDLILLDVMLPGKDGLEVCRELRRAGLKTPILMLTAKARETEKVMGLEIGADDYVTKPFGTKELRARIK
>Acid_5033_HK_Classic|Candidatus_Solibacter_usitatus_Ellin6076|Pair_Acid_5032|HisKA_244-307/Acid_5032_RR_OmpR|Candidatus_Solibacter_usitatus_Ellin6076|Pair_Acid_5033|Response_reg_4-112	-RRNMVGDISHELRTPLTRMQCQVEAIQDLAPSTPEALHQLHDQILQLDRLVDDLQDLSLSDAGILVVEDDQRTAESIKLYLEHDGF-EARLAADGLSALELCRTTAPDLVILDRMLPLVDGAEICRRLRAAG-NIPIIMLTARTTEADKLEGLRLGADDYVTKPFSPRELVARV-
>Acid_5478_HK_Classic|Candidatus_Solibacter_usitatus_Ellin6076|Pair_Acid_5477|HisKA_216-281/Acid_5477_RR_OmpR|Candidatus_Solibacter_usitatus_Ellin6076|Pair_Acid_5478|Response_reg_3-113	-MRRFVADASHELRTPISVIRGEADVALSGNGEYRESLGIVLDESRRLSRLVDDLLNLARADAGILLVEDESRVAGFLAKGLREQAY-AVDLAADGESALYQAAVNHYDLVILDVMLPLKNGYAVCRELRAAGFSAPILMLTARDSIDDRVAGLDSGADDYLVKPFDFKELLARL-
>Acid_5814_HK_Classic|Candidatus_Solibacter_usitatus_Ellin6076|Pair_Acid_5815|HisKA_278-342/Acid_5815_RR_CheY|Candidatus_Solibacter_usitatus_Ellin6076|Pair_Acid_5814|Response_reg_3-109	-LQQFVYSASHDLQEPLRMIAAFSGMLKKLGPEADQYIELTLEGALRMEQLLKDLRSFAQI----------------IREALDLHGVAELLVLTDGEKAIDFFEGLNPDLAIVDLSLPKRSGLEVLQHIRPGFRKPAIVVLSSSDTPGDKSESHRLGADLFIQKPSRLDEFMN---
>Acid_5902_HK_Classic|Candidatus_Solibacter_usitatus_Ellin6076|Pair_Acid_5903|HisKA_381-449/Acid_5903_RR_unclassified|Candidatus_Solibacter_usitatus_Ellin6076|Pair_Acid_5902|Response_reg_6-109	AKSRFLASVSHELRTPLNGIIGFSELLYDLSGEQIEVMGDILTSARHLLQLINDILDLSKVEAGILIVDDTPVNLKLTRILLVNEGY-KVLTAASAEEALELLRGYQPRLVLADIQLPGIDGLEMTRRIKQDERDTLVVALTAFAMKGDEQRAIEAGCDGYLVKPIDTRS------
>Acid_6787_HK_Classic|Candidatus_Solibacter_usitatus_Ellin6076|Pair_Acid_6786|HisKA_398-461/Acid_6786_RR_NtrC|Candidatus_Solibacter_usitatus_Ellin6076|Pair_Acid_6787|Response_reg_4-116	-MHRLIGSVAHEVKNPLNSIAVRLDYLQSASPEAEEEVQVIVEEVNRLDRVVRNFLDFTR----VLVVDDEASQRSAVARMIDRWGF-STDTAADGAEAFRKAQEFNFDAIVTDLMMPGMDGIELLHRLRQEYVGPSTIVVTAYGNIETAISTVEYGAFWFIEKPIRPRAF-----
>Acid_6896_HK_Classic|Candidatus_Solibacter_usitatus_Ellin6076|Pair_Acid_6895|HisKA_239-306/Acid_6895_RR_OmpR|Candidatus_Solibacter_usitatus_Ellin6076|Pair_Acid_6896|Response_reg_19-129	-MTQFTADASHELRAPVSLIRTTAEVAKRPASEYLEALDGIQEEAERTSQVVDSLMLLARTDSGILIVEDDRKLARQLKKGVDESGHASI-LAFDGREGLEAAQGNEFDVIVLDVMLPKLDGISVLRQLRQTRIGTPILLLTALDTPDDISTGLDAGADDYLTKPFSFKVLLARL-
>Acid_7044_HK_Classic|Candidatus_Solibacter_usitatus_Ellin6076|Pair_Acid_7043|HisKA_217-277/Acid_7043_RR_OmpR|Candidatus_Solibacter_usitatus_Ellin6076|Pair_Acid_7044|Response_reg_3-112	-ERRLLLDISHELRSPLARLGVAIELARS-GDDTEAALNRIQKESDRLNALVGQLLQVTRAEG-ILLVDDDAELASLLSEFLRREGF-TVEAAHEGNRGLEKALQPGIDLVVLDVMLPGIDGFEILKRLRQRS-KVPVLMLTARGEDVDRIVGLELGADDYLAKPFNPRELAARIR
>Acid_7352_HK_Classic|Candidatus_Solibacter_usitatus_Ellin6076|Pair_Acid_7351|HisKA_239-302/Acid_7351_RR_NtrC|Candidatus_Solibacter_usitatus_Ellin6076|Pair_Acid_7352|Response_reg_2-96	--QTLARKMAHEVKNSLTPIRLTVEEMVRDRGFMEQATQIVVDEIETLERRIRAFSQFA---------------------ILEREGY-SVNVCKSVTEFGKHPDAGRADAYMLDMKLPDGSGIDLLKVVKQNGATAPAIMISGHGTIADAVEATRAGAFDFLEKPLSRDRVLLAV-
>Acid_7554_HK_Classic|Candidatus_Solibacter_usitatus_Ellin6076|Pair_Acid_7553|HisKA_571-638/Acid_7553_RR_CheY|Candidatus_Solibacter_usitatus_Ellin6076|Pair_Acid_7554|Response_reg_7-125	-LEEFAYVASHDLQEPLRMVNVYTQLLKRASLQLQEYADYVAAGVKRMDVLIRDLLTYSRVT--IFLAEDNAGDVELVREALREHHIHELTLARDGLAARDYIQRLRPDILLLDLNLPKAEGHELFRMFRANPSRTPVIVVTSSNAPKDRERAEALGAAHYFRKPSDLMEFL----
>Acid_7838_HK_Classic|Candidatus_Solibacter_usitatus_Ellin6076|Pair_Acid_7839|HisKA_598-663/Acid_7839_RR_NtrC|Candidatus_Solibacter_usitatus_Ellin6076|Pair_Acid_7838|Response_reg_9-119	-KNDVISLVSHEMRTPLTAIQGMTELLAAEPSRRREMNLAINDEVKRLARMITEYLDITRLESGILIADDERSIRLMLETGLTLNGF-RVTSARNGREALELATAGKFDAVLSDIYMPDLGGLELVDALRAADANLPIVLMTAQGSLQVAVEAVTRGASDFIGKPFDVSAVVELL-
>Acid_7874_HK_Classic|Candidatus_Solibacter_usitatus_Ellin6076|Pair_Acid_7873|HisKA_363-431/Acid_7873_RR_NtrC|Candidatus_Solibacter_usitatus_Ellin6076|Pair_Acid_7874|Response_reg_4-114	-WRELARRLAHELKNPLFPLQITVENMQRFDEVFREGTTTLLAELAQLKQIVGRFSDFARM----LIVDDDANTLASLARAFRLAGH-EATVCDNASRALELVKGQGFDMMLSDVVMPGKDGLTLLEEVRGLGITLPVVMISGQANIEMAVRATRLGAIDFLEKPLSTDKLLLTV-
>SAS2253_HK_Classic|Staphylococcus_aureus_subsp._aureus_MSSA476|Pair_SAS2252|HisKA_239-303/SAS2252_RR_OmpR|Staphylococcus_aureus_subsp._aureus_MSSA476|Pair_SAS2253|Response_reg_5-113	-RQHFVQNVSHEIKTPLTHIHHLLSELQQDNTLRQQYINDIYTITTQLSGLTTELLLLSELDN--LVVDDDPRILNYIASHLQTEHI-DAYTQPSGEAALKLLEKQRVDIAVVDIMMDGMDGFQLCNTLKNDY-DIPVIMLTARDALSDKERAFISGTDDYVTKPFEVKELIFRI-
>LACR_0443_HK_Classic|Lactococcus_lactis_subsp._cremoris_SK11|Pair_LACR_0444|HisKA_227-293/LACR_0444_RR_OmpR|Lactococcus_lactis_subsp._cremoris_SK11|Pair_LACR_0443|Response_reg_4-113	-RRLFVSNVSHELRTPLTSVKAYLEALEDDKETASSFIGVSLTETNRMIRMISDLLTLSRMDQ-ILVVDDEKPISDIVKFNLTKEGF-EVFTAFDGEEALEAFKEVQPDLILLDLMLPKLDGLDVAREIRKTS-DTPIIMVSAKDSEFDKVIGLELGADDYVTKPFSNRELLARIK
>LACR_0899_HK_Classic|Lactococcus_lactis_subsp._cremoris_SK11|Pair_LACR_0898|HisKA_166-232/LACR_0898_RR_OmpR|Lactococcus_lactis_subsp._cremoris_SK11|Pair_LACR_0899|Response_reg_17-129	-EKEFASNLSHELRTPVMAISGYISLLKRHPEIFEKSLNYLEQESERLKKLIEDFLTLSRKG--ILIIEDEESISNLLETELSFEGY-NVFSAADGMSGLKIFEEKQLDVVLLDWMIPKLDGLEVLRRMKKMTNKVPVIFVTARDYVGDKVAGLDAGADDYLTKPFNIEELMARL-
>LACR_1524_HK_Classic|Lactococcus_lactis_subsp._cremoris_SK11|Pair_LACR_1523|HisKA_303-365/LACR_1523_RR_OmpR|Lactococcus_lactis_subsp._cremoris_SK11|Pair_LACR_1524|Response_reg_4-114	--NAFIANVSHELKTPLTSIKGFAELLETSPSETKNFASIIHKESSRLMSLVQDTLLLTKQN--ILIADDDRAILTLLSYNFRQNDY-EVTIVSDGKKAYDKARKNPFDLLLLDLMMPEFSGIEVTKKLRKEGNFTPILILTARDDDEMKLTGLSAGSDEYLDKTTPMKEIIVR--
>LACR_1700_HK_Classic|Lactococcus_lactis_subsp._cremoris_SK11|Pair_LACR_1701|HisKA_205-271/LACR_1701_RR_OmpR|Lactococcus_lactis_subsp._cremoris_SK11|Pair_LACR_1700|Response_reg_6-115	-QNRFVSDVSHELRTPLAVLDGHINLLNRDPEVLDESLQASLDEVDRMKKMLEEMLALARLEN-ILIIEDEKNLARFVSLELEHEGY-ATEIKDNGRSGLEEATSKDYDLILLDLMLPELDGFEVARRLRKEK-DTPIIMMTARDSTMDRVAGLDIGADDYITKPFAIEELLARVR
>Despr_0476_HK_Classic|Desulfobulbus_propionicus_DSM_2032|Pair_Despr_0477|HisKA_158-218/Despr_0477_RR_NtrC|Desulfobulbus_propionicus_DSM_2032|Pair_Despr_0476|Response_reg_14-124	--GQLTAGVAHELNEPLASILGFAQLATKAPVHVARYLDKIIQSTLHAREIIKKMMLFSS----ILVVDDAEDAREVIHTHLEDAGY-MVRTCASVAEALLAVESSVFDIIITDLRMPKASGLELIQHVRNTLEDIEVMMITGYPSIEGAIEAIKTGAEHYLPKPFTERELLEAVR
>Despr_0505_HK_Classic|Desulfobulbus_propionicus_DSM_2032|Pair_Despr_0506|HisKA_271-333/Despr_0506_RR_OmpR|Desulfobulbus_propionicus_DSM_2032|Pair_Despr_0505|Response_reg_3-112	-QKRLLRDISHELRSPLARLNLALELARKQ-AEEDGNLDRIGRESERLNNLISQLLSLTRSEA-ILLIDDDTELCDLLTEYLEQEGF-AVSACHEAQQGLTTALAGDHSFLILDVMLPGFNGFDLLRKIRQAS-TVPVLMLTARGDEVDRIVGLELGADDYLPKPFNPRELVARIR
>Despr_0956_HK_Classic|Desulfobulbus_propionicus_DSM_2032|Pair_Despr_0957|HisKA_416-491/Despr_0957_RR_RpfG|Desulfobulbus_propionicus_DSM_2032|Pair_Despr_0956|Response_reg_33-141	ALGELVAGVAHEINTPVGVALSAGSTLAEKRSDLTAYLEEAREGTERASDLIRS----------ILIVDDEADVHSVTTFMIRGRRF-QFFHAYSGGEARRILEQQDLAVVLLDVVMESDSGLQLVHFIREELRSVRIVLRTQPGKAPAAKVILEYDINDYKEKT-----------
>Despr_0964_HK_Classic|Desulfobulbus_propionicus_DSM_2032|Pair_Despr_0963|HisKA_521-589/Despr_0963_RR_PrrA|Desulfobulbus_propionicus_DSM_2032|Pair_Despr_0964|Response_reg_5-105	--QEVARRIAHEIKNPLTPIQLSAQRLRKNRAIFDQCTATIINQVDEIKNLVSEFSDFARM---ILIIDDEAAIRESLAGILVDEGF-VPLTAASAEEGLQVLDEKNISLILLDIWMPGMDGLEALRLIKQRF-SLPVIMISGHGTIETAVQATRNGAFDFIEKPLSYDKT-----
>Despr_1035_HK_Classic|Desulfobulbus_propionicus_DSM_2032|Pair_Despr_1034|HisKA_303-366/Despr_1034_RR_NtrC|Desulfobulbus_propionicus_DSM_2032|Pair_Despr_1035|Response_reg_3-113	ALGRATATIAHEVRNPLNAISMGLQRLQLLDGEHRQLIAAMNEAVRRASGIISELQRFTR----ILIVDDEPLQRDMLSGFLKKQGY-TVHEAANGTEALSQFMRQPIDLVLLDHRMPDMNGDEVLARIKAQSPLARVIMITAYGAVDTAVRVMRLGADDFLEKPIDLEALLAKIR
>Despr_1191_HK_Classic|Desulfobulbus_propionicus_DSM_2032|Pair_Despr_1190|HisKA_756-822/Despr_1190_RR_unclassified|Desulfobulbus_propionicus_DSM_2032|Pair_Despr_1191|Response_reg_20-128	--GKLSASIAHEFNNPLQGILSVLKGLKKLEAEDRELLEAAIAESDRIKELIRGLQDFNRPSS-ILLVDDEPLIRRSLARDLAAPNF-TVSQAASGEEAIARIDSGQWDLVITDLVMPGLDGFQVLKTAKRRNASTMVIILTGYGDMQAAIDALRLGADDFLQKPIDSDELL----
>Despr_1201_HK_Classic|Desulfobulbus_propionicus_DSM_2032|Pair_Despr_1202|HisKA_239-303/Despr_1202_RR_OmpR|Desulfobulbus_propionicus_DSM_2032|Pair_Despr_1201|Response_reg_3-113	-QKEFVANASHELKTPLTLLRLSMEEMQDLPVPMQERLLTQERTLTRISQLVKSLLDLSRLE--VLIVDDEPELREQIALSLRQQQY-TVDTAGDGALALEKVFADPFDLIVLDLMLPEKDGFTVLRELRAEGVKTPVLMLTAKGEVDSRVKGLDLGADDYLHKPFSMAELLARIR
>Despr_1377_HK_Classic|Desulfobulbus_propionicus_DSM_2032|Pair_Despr_1376|HisKA_297-361/Despr_1376_RR_PrrA|Desulfobulbus_propionicus_DSM_2032|Pair_Despr_1377|Response_reg_4-114	ALGQLTAGIAHEINNPLAGMLNCVSAMQKL-DVQKRYLPLLHKGLKRIELTMRQLLNYGRVD--ILLVEDDEIMRISLHDRLRRERW-QVDAAVNGRDALSLLDQKHYHLILSDIRMPGLGGMELLEWARKQSPLIDIFMMTAYGSVEDAITCLRNGAADYILKPFEMDDLIIRI-
>Despr_1479_HK_Classic|Desulfobulbus_propionicus_DSM_2032|Pair_Despr_1478|HisKA_254-321/Despr_1478_RR_NtrC|Desulfobulbus_propionicus_DSM_2032|Pair_Despr_1479|Response_reg_6-116	SLGTLTAGVAHQLNNPLNNISTSCQIAVDDVPLLKRMLTNIDQETLRARDVVKSLLEFSRAQ--ILIVDDEPIARDNLAHIVGKDGH-TALVAADGQQAIDLLKKQEVDLVLTDLCMPGKDGMAVLDEAKQRWPAVEVVVITGHASVDTAVEAMRRGAYHYVAKPFKINELRAVV-
>Despr_1656_HK_Classic|Desulfobulbus_propionicus_DSM_2032|Pair_Despr_1657|HisKA_265-329/Despr_1657_RR_OmpR|Desulfobulbus_propionicus_DSM_2032|Pair_Despr_1656|Response_reg_4-113	-RRRWVADISHELRTPLSVLRAEIEAIQDVRQWTPQTMEHLHGEILHLSRLVDDLLALADI---ILVVEDEQRLASILADYLHAAGY-STHCLGEGRGVVAWVRGNRPDLILLDLMLPGRDGMEICKEIRTFS-TVPIIMVTARIEEIDRLLGLELGADDYVCKPFSPREVVARV-
>Despr_1732_HK_Classic|Desulfobulbus_propionicus_DSM_2032|Pair_Despr_1731|HisKA_473-535/Despr_1731_RR_NtrC|Desulfobulbus_propionicus_DSM_2032|Pair_Despr_1732|Response_reg_6-110	SLGQLSAGIAHEIRNPLASIYFNVQLLAKAADPTLALINDTQKGINRIRALVKGMLDFAK----ILIVDDDRLLQNALKNILD-EHY-TPVIAGSGEEALRILKKTPVDLVLLDIRLPGMDGIETLQRIKAMAKELVVIMMTAFEDVATVITSMKLGAHDYLVKPLEMEMLE----
>Despr_1752_HK_Classic|Desulfobulbus_propionicus_DSM_2032|Pair_Despr_1753|HisKA_586-645/Despr_1753_RR_NtrC|Desulfobulbus_propionicus_DSM_2032|Pair_Despr_1752|Response_reg_18-125	--GKLTAGLAHEINNPLGVILCYAGLLRQTDPQQITDLEIIERHTRQAQRVLRDLLDFARPK--IVIVDDEQDFARGLARLVSRFPEARVEAALSGAEALRLLAARKVQLMITDLRMPEMNGMQLLTEALKLDPDLSMVVLSAYGTIETAVEALHAGAYDFLTKPIEPEQLFRV--
>Despr_2004_HK_Classic|Desulfobulbus_propionicus_DSM_2032|Pair_Despr_2005|HisKA_171-243/Despr_2005_RR_NtrC|Desulfobulbus_propionicus_DSM_2032|Pair_Despr_2004|Response_reg_8-118	--GALAAGVAHEINNPLTAINGFAQGLKRLFCDFKEYTETIIKECLRCRDIVQTLLTFSRP---ILVVDDEESIRRLLQKELANSRR-EILTAADGAEALAMIRNHWFDVIIMDLWLPDVSDLELLIKIRESIPHIEVIMITGHGDVDIAVEAMKLGACDFIRKPFNLDRLDLI--
>Despr_2029_HK_Classic|Desulfobulbus_propionicus_DSM_2032|Pair_Despr_2028|HisKA_286-348/Despr_2028_RR_CheY|Desulfobulbus_propionicus_DSM_2032|Pair_Despr_2029|Response_reg_16-114	-VGQMAAGIAHEINTPLGIILGYAQLMMDKDSETYQNLEVIERQTKASRKIVADLLKYSRQ---ILTLDDVLDATVLVGKILKKKGH-VVHTFTEEDAAIAFARQHPVDLAILDIKLKKMSGIEVLAILKEDNPSMRAIMLTGYPTVETAREAISLGADEYCVKPIDRTELEEKV-
>Despr_2079_HK_Classic|Desulfobulbus_propionicus_DSM_2032|Pair_Despr_2078|HisKA_279-345/Despr_2078_RR_NtrC|Desulfobulbus_propionicus_DSM_2032|Pair_Despr_2079|Response_reg_7-117	-VGRLAAGLAHEIGNPLGIVQGYLGLIRHGGAEREEFCSRAEHELQRIGQLVRQLLDFSRPAS--LIIDDEENMRHMLTSVLSRLGY-QVEVAAHGQAGLDALATGDFDVVLCDIRMPGMDGLEFLRQAIAAGISATIIMMSAFGSVDTALAAMRLGAYDYISKPFKAEEIEL---
>Despr_2352_HK_Classic|Desulfobulbus_propionicus_DSM_2032|Pair_Despr_2353|HisKA_394-462/Despr_2353_RR_NtrC|Desulfobulbus_propionicus_DSM_2032|Pair_Despr_2352|Response_reg_7-117	ALGQMSAGISHELNQPLAAIRSYSDNGRLR---FDENLEQISELTERMAQIGVQLRQFSRKSSGVLFIDDERHIRQANMQTLELADL-EVLCFEDAESALPHLSMDWPGVVICDIRLPAMNGLEFLLQTQKIDRDLPVILITGHGDISTAVQAMRDGAYDFIEKPYSAERLVKTV-
>Despr_2472_HK_Classic|Desulfobulbus_propionicus_DSM_2032|Pair_Despr_2471|HisKA_341-408/Despr_2471_RR_NtrC|Desulfobulbus_propionicus_DSM_2032|Pair_Despr_2472|Response_reg_6-116	--GELSASIAHDFRNPLAAISGSAQILAMDATTFKTLVAIISRESNRMAKTITDFLQFAR----ILVVDDELSMREFLKILLEKEGY-QVATAADGQAALERAEKTAFDLVITDIRMPGMSGLDLLARLKQLQADIGVIMITAFASPDDAVTAMKSGAFDYITKPFNVDEIKTVI-
>Despr_2566_HK_Classic|Desulfobulbus_propionicus_DSM_2032|Pair_Despr_2565|HisKA_172-226/Despr_2565_RR_unclassified|Desulfobulbus_propionicus_DSM_2032|Pair_Despr_2566|Response_reg_6-114	-------SLVHELNNPLCGVRGVVERMARPAAAERSLLDLALGQCTRMQHLLRAVQQF------ILIVDDEELIRETLRLDLLDQGY-AVDLAASGDEALGLLDKA-YDLIITDLMMEGTDGLEVLRLAKDKRPDQAVFILTGHRELEAAVGALRLGADDYLTKPYDYDEMILRV-
>Despr_3336_HK_Classic|Desulfobulbus_propionicus_DSM_2032|Pair_Despr_3337|HisKA_370-435/Despr_3337_RR_OmpR|Desulfobulbus_propionicus_DSM_2032|Pair_Despr_3336|Response_reg_6-118	-RQDFVANVSHELKTPITAIKGYVETLLDDQDNARRFLSIVVRQANRLDAIVDDLLTLSRIED-ILVVEDDADIQQLVSYNLIKAGF-NVTCADSGEEALQLLAREPIDAMVLDLMLPGKDGNEVCRAVRGQEKGLPIIMLTAKSEEDDIVSGLECGADDYVTKPFSPRVLIARL-
>Gmet_0500_HK_Classic|Geobacter_metallireducens_GS-15|Pair_Gmet_0501|HisKA_123-209/Gmet_0501_RR_CheY|Geobacter_metallireducens_GS-15|Pair_Gmet_0500|Response_reg_11-120	-LQTFVSSVSHDLRSPVVSIKGFTGELRGYREEMLEAIGFVESSAKRVERLVNLLVVFSKLEG--ILIEDEPGHTRLITKNLMSADV-EILPFDTGRRALEYFEGKTQHLVVLDINMPGIDGFEVLKRLKGNEAAVPVIVFTTTDHPDEIRRCYHEGANLYLVKPMDYTA------
>Gmet_0527_HK_Classic|Geobacter_metallireducens_GS-15|Pair_Gmet_0528|HisKA_261-320/Gmet_0528_RR_OmpR|Geobacter_metallireducens_GS-15|Pair_Gmet_0527|Response_reg_3-113	-----SANLAHEIRTPINILRGEAEVASRSAEEYRRVIESSLEEYERLSRLIDNILFLARAEQ-ILIIEDEKKAAAYLQKGFTENGF-SADTAQNGEDGLHLARTEAYDLVILDIMLPGRDGWSVLEELRRGGSEVPVIYLSARDAVQDRVRGLELGADDYLVKPFAFSELLARA-
>Gmet_0554_HK_Classic|Geobacter_metallireducens_GS-15|Pair_Gmet_0555|HisKA_270-332/Gmet_0555_RR_NtrC|Geobacter_metallireducens_GS-15|Pair_Gmet_0554|Response_reg_6-116	-VGEMAAGIAHEIKNPLAGISAAMTIIRQDEDPRKEIIGEVVEQVSRLDKTVNDLLFFGK----ILVVDDEHLIRWSLEQNLKKQGY-EVVSAGNGEDALRLVRDEQPDLVLLDIQLPGISGLDVLEKIKEHDEEIIVIMVTAHGALETAVHAMRLGAFDYINKPFNLDEMA----
>Gmet_0687_HK_Classic|Geobacter_metallireducens_GS-15|Pair_Gmet_0688|HisKA_225-289/Gmet_0688_RR_OmpR|Geobacter_metallireducens_GS-15|Pair_Gmet_0687|Response_reg_3-113	-QRRFIADAAHELRSPLTALTVQAENLEHSSPEGKLRVMQLKAGLERAGKLLEQLLSLARHQS-ILLVEDDRMIGEAVEQALKDAAY-AVDWVRDGISASDAVETGEYQLVILDLGLPGRDGLGVLERMRGDGNNAAVLIVTARDALDDRIRGLDLGADDYLVKPFAVGELLARIR
>Gmet_0701_HK_Classic|Geobacter_metallireducens_GS-15|Pair_Gmet_0702|HisKA_437-499/Gmet_0702_RR_NtrC|Geobacter_metallireducens_GS-15|Pair_Gmet_0701|Response_reg_7-117	SLGVLSSGVAHEINNPLGVILGYASYIEGEDDPNYRFIHEIKRESKRCKKIVQDLLSYAR----IMLIDNEEGLCRMMEAVLLDSGY-GVKGYTRSFEAVEEFRPGDWDLVVSDIKMPGMDGLEVLQRIKAKEPAIPVIMITAYATVEMSIQALRRGAYDMLTKPFEPEELLYRV-
>Gmet_0960_HK_Classic|Geobacter_metallireducens_GS-15|Pair_Gmet_0961|HisKA_269-335/Gmet_0961_RR_NtrC|Geobacter_metallireducens_GS-15|Pair_Gmet_0960|Response_reg_5-115	--GLLAAGTAHEIGTPLTSIMGYAGLLMDDDPRKADYLRRIERDAERIDRIVRDLLNFARPA--VLVIDDEENLRHMLGAMLRKNGY-HADEAADGEQALAMAGEHPYDFIICDIRMPVLDGLGFLRRAQEAGIGGTIIMMSAYGTIDTALQCMKEGAYDYVSKPFKNDEILL---
>Gmet_1027_HK_Classic|Geobacter_metallireducens_GS-15|Pair_Gmet_1026|HisKA_245-311/Gmet_1026_RR_OmpR|Geobacter_metallireducens_GS-15|Pair_Gmet_1027|Response_reg_3-113	-EKRLIADASHELKTPVSVIKVQCDVLQRTPEEYIDAIQTIRTVSDTISMIVRDLLSLARLDSGILIIEDEKRMAGILKKGLEENAF-IVDLAGDGEEGLYMAENYPYDAVLLDIMLPVMDGLSILSALRSKRSEVPVLLITARGEIESRIKGLNFGADDYIVKPFDFHELLARL-
>Gmet_1054_HK_Classic|Geobacter_metallireducens_GS-15|Pair_Gmet_1055|HisKA_325-389/Gmet_1055_RR_NtrC|Geobacter_metallireducens_GS-15|Pair_Gmet_1054|Response_reg_6-116	ALGEMAAGVAHELNSPMTVIIGTAQLLLRAQYDRAEVLEDIVNSGLRCKRIIQNLLTFSRQN--VLIIDDEADVCTFFRRLLTRKGY-DVVTASKEPEAMRAIEEHRFTVAMVDLKLPDTDGLTLLQAIKARQPACEVIIMTGYSTIKTAVAAMQLGAYEYLEKPFDIDEIEA---
>Gmet_1057_HK_Classic|Geobacter_metallireducens_GS-15|Pair_Gmet_1058|HisKA_449-507/Gmet_1058_RR_NtrC|Geobacter_metallireducens_GS-15|Pair_Gmet_1057|Response_reg_5-114	--GMLAAGVAHEINNPLAIIRGNTELLQMEDDPSREEVDTIAQQTGRVERIVGSLLKFARQQ--ILICDDEEGIRRYLQKMFLAKEY-DVETFADGTSLLARITEGDADILLQDVRMPDMDGIEVLKRVKKLRPAMPVVVMTAFGTIDAAVEAIKLGAYDYVTKPFPKEKIL----
>Gmet_1083_HK_Classic|Geobacter_metallireducens_GS-15|Pair_Gmet_1082|HisKA_733-823/Gmet_1082_RR_NtrC|Geobacter_metallireducens_GS-15|Pair_Gmet_1083|Response_reg_9-120	SLGVLVSGIAHEINNPNTFIQGNASLIESP-----VLLHGVKEGSRRISAIVNNLKDFAREDT-ILVVDDEEEILFTTSITLRSAGFPPVLTESDSRNVMGILARQEVALVLLDLYMPHLPGYELLKEITANHPEIPVIVVTAANEVGMAVECMKAGAFDYFVKPMEPPRLLATV-
>Gmet_1292_HK_Classic|Geobacter_metallireducens_GS-15|Pair_Gmet_1291|HisKA_113-178/Gmet_1291_RR_OmpR|Geobacter_metallireducens_GS-15|Pair_Gmet_1292|Response_reg_8-117	-QKDFISQATHELKSPLASIKLHLETILRPPEKLERFLDTMLVDIDRLDNLTSNILMVAKLEQ-ILLVEDEMHLARGICFNLEMEGY-RVSHVESGEEALERLAYDRFALIILDVMLPGMDGFAVCERIRTMDSRVPVLILTARSDEGARVTGLQSGADDYLTKPFSLNEFLLR--
>Gmet_1396_HK_Classic|Geobacter_metallireducens_GS-15|Pair_Gmet_1397|HisKA_325-385/Gmet_1397_RR_NtrC|Geobacter_metallireducens_GS-15|Pair_Gmet_1396|Response_reg_5-115	--GELSARMAHEIRNPLAAISGSAQLIAQP-EADRELFAIVLREADRLNGLITDFLAYARP---ILVVDDELSMREFLAILLKREGY-AVDQADCAEKALEFLDSITYDLVISDVKMPGLDGIALLGRIKENSPDTAVLMMTAFSTAEQAVEAMKLGAYDYIAKPFKVEEVKV---
>Gmet_1993_HK_Classic|Geobacter_metallireducens_GS-15|Pair_Gmet_1992|HisKA_478-537/Gmet_1992_RR_NtrC|Geobacter_metallireducens_GS-15|Pair_Gmet_1993|Response_reg_4-118	-MGRVSAFIIHDLKNLVYTLSLTVDNGREDPEFQDDLLDTLSNTVNRMKVLISRLKN--------LIVDDNEDIRRQLRWGIG-KEY-SLHLAADGTEALELFRKHRPQVVTLDLGLPPHEGFRCLGEMLRIAPDAKVIVITGNEGKENAVKAVQMGAYDFYQKPIDLNELKVII-
>Gmet_2035_HK_Classic|Geobacter_metallireducens_GS-15|Pair_Gmet_2034|HisKA_121-183/Gmet_2034_RR_NtrC|Geobacter_metallireducens_GS-15|Pair_Gmet_2035|Response_reg_9-108	--GKVSATLAHGVRNPLNAIKGAVVYLKHSDETFVEFADIIDEEIAKLDGFITKFLSTSLLE--VLIVDDEPNALKVLAAILREEGY-SVFKAGDAAEAEQALSKEDIDTVITDMKMPGKDGIQLMDFMAEHYPDIPIIFLTAYGSVDSAVHAITRGAFYYFIKPPDYVKLK----
>Gmet_2146_HK_Classic|Geobacter_metallireducens_GS-15|Pair_Gmet_2145|HisKA_384-439/Gmet_2145_RR_NtrC|Geobacter_metallireducens_GS-15|Pair_Gmet_2146|Response_reg_4-114	--GHLALGLAHEIRNPLSAIQMNMQMIRKPAGTLRENFSIVEEEIQRLNRLLNDVLDFARS---ILVADDDRAIRRTLELHLAETGY-TVLTAATGNEAVDLALARDVGLVLLDLRLTGMDGFEVLTLIKERKPALPVIMITAYDDMQTAIEAIRLGAIDHLGKPLDLDQLDQII-
>Gmet_2436_HK_Classic|Geobacter_metallireducens_GS-15|Pair_Gmet_2437|HisKA_669-735/Gmet_2437_RR_OmpR|Geobacter_metallireducens_GS-15|Pair_Gmet_2436|Response_reg_10-119	--RALLNSISHDLRTPLVSITGALDTLREANEARMELLDTAWEEAERLNRFVGNLLDMTRLEAGILIVDDELAIRRFLCTALDTGEF-SLHQAENGHTALAAAVATMPDVILLDLGLPDMDGVEVIRRIREWS-QVPIIVLSVREREDDKVAALDAGADDYLTKPFGVAELVARIR
>Gmet_2454_HK_Classic|Geobacter_metallireducens_GS-15|Pair_Gmet_2453|HisKA_150-216/Gmet_2453_RR_NtrC|Geobacter_metallireducens_GS-15|Pair_Gmet_2454|Response_reg_11-121	ALGELSAMLAHEIRNPLGSIRGTAEILRDPGHPKHEFLEILLKETDRLNRVVEDFLRLSRPGD-VLIVDDDVSLRRVLEYNLQEEGY-EVLTAGSGEEGLRLFEDGAPTLVVTDLKMPGMGGFQLLREVKERFPDTVVIVITAFGAVEAAVEAMKAGAYDFITKPFNREALKLTV-
>Gmet_2562_HK_Classic|Geobacter_metallireducens_GS-15|Pair_Gmet_2563|HisKA_138-199/Gmet_2563_RR_NtrC|Geobacter_metallireducens_GS-15|Pair_Gmet_2562|Response_reg_6-116	-LGTLAAGLAHEIKNPLGGIKGAAQLLEMPESELRDNVRVVVREVDRVNRIVEELLALSS----ILVADDEESMRWVLSKALRKKGF-SVDLARDGEEALRLIQSGDYDLAILDIKMPGISGLDLLDRVKELKSDLLMVIMTAEASMKNAVEAMKRGAYDYITKPFDLDVIDAII-
>Gmet_2694_HK_Classic|Geobacter_metallireducens_GS-15|Pair_Gmet_2693|HisKA_365-432/Gmet_2693_RR_OmpR|Geobacter_metallireducens_GS-15|Pair_Gmet_2694|Response_reg_4-116	-RRDFVANVSHELRTPVTVIKGYAEALIDDPERARKFVGIILSHSERLAALIGDLLTLSQLEAGVLIIEDEKDLAELVSFNLEKEGY-RTIAAPDGISGLDEAQRQVPDLILLDLMLPGMMGTEVCKILKKSEAKIPVIMLTARGEEIDRVVGFEVGADDYVVKPFSTRELLLRI-
>Gmet_3157_HK_Classic|Geobacter_metallireducens_GS-15|Pair_Gmet_3158|HisKA_251-316/Gmet_3158_RR_NtrC|Geobacter_metallireducens_GS-15|Pair_Gmet_3157|Response_reg_5-115	--GQLASGIAHEIRNPLNYISLAIDHLKSKTERVVPVADKIKEEVRRANYMVVNFMNFGR----ILIVDDERAQREIIQTILEGEGY-RVAAAPGGREALEQLETSEFDVILTDLKMQGMSGMELLERVLEADPLQCAIMMTAHGTVDSAVEAMKKGAFDYLEKPLERDNLLLT--
>Gmet_3180_HK_Classic|Geobacter_metallireducens_GS-15|Pair_Gmet_3179|HisKA_325-384/Gmet_3179_RR_CheY|Geobacter_metallireducens_GS-15|Pair_Gmet_3180|Response_reg_4-112	--GKITSSIAHSIRNPLMIIGGFARTLLRDDDPQREYLESIGQQVRQLEEVLEDILNYS------LVVDDESSIRLLYSQELADDGH-EVATAATAAEAVEKIKESEFDLIVLDIKLKNESGLDLLQKVVKERHNLPVILCTAFSC--FKDDFSAWLADGYVVKSSDLTELKEEV-
>Gmet_3382_HK_Classic|Geobacter_metallireducens_GS-15|Pair_Gmet_3383|HisKA_247-311/Gmet_3383_RR_OmpR|Geobacter_metallireducens_GS-15|Pair_Gmet_3382|Response_reg_3-113	--KQFTGDVSHELRTPLTILRGETEVGLREPEEFRELFRSNLEEINRMSKIIEALLELSRAEEGILVVEDEKKVSSFIKRGLEEERY-EVEAAFNGEDGLKMALEKGFDLIILDVMLPKKDGLSVVRELRERKNATPVLMLTAKDSVEDIVAGLDSGSDDYLTKPFAFAELLARVR
>Desaci_0141_HK_Classic|Desulfosporosinus_acidiphilus_SJ4|Pair_Desaci_0142|HisKA_256-317/Desaci_0142_RR_NtrC|Desulfosporosinus_acidiphilus_SJ4|Pair_Desaci_0141|Response_reg_8-118	-LGELAAGIAHEIRNPFTAVKGYSQVLEDIDDPRREYTAVIVKEVNRLDRIVQGLLDFAR----ILVADDEESVRNLTSRVLSKMNY-TVTTASNGEEVLDKVRNCSFDLLIMDIRMPKLDGMEAFKTLRINYPGLPIIMMTAFSTVETTLEAMRLGAFDYLTKPFDISEVKTAV-
>Desaci_0272_HK_Classic|Desulfosporosinus_acidiphilus_SJ4|Pair_Desaci_0273|HisKA_252-316/Desaci_0273_RR_OmpR|Desulfosporosinus_acidiphilus_SJ4|Pair_Desaci_0272|Response_reg_5-114	----IISSISHDLKTPVTSIKGYVEGILDTPEKMERYLKTISLKAHQVDQMIDDLLLYAKLD--ILIIEDDLSIAELQKDYLEVADF-DVMVCGNGSAGLSLLQEEEIDLLILDIMLPGMDGLEILKVMKENK-AIPVLLVSAKKEEIDKIKGFSLGADDYITKPFSPGELVARVK
>Desaci_0308_HK_Classic|Desulfosporosinus_acidiphilus_SJ4|Pair_Desaci_0309|HisKA_272-339/Desaci_0309_RR_OmpR|Desulfosporosinus_acidiphilus_SJ4|Pair_Desaci_0308|Response_reg_5-114	-QIRFVSDASHELRTPISVIQGYVNLLDRDEKTLQESIDAIKDETENMKSLVEQLLFLARGDN-ILIIEDEEKIARFIELELGYEGY-LTTKAFDGRTGLELAESGEFDLVLLDVMLPKLSGMEVLRRIRRTS-SIPVILLTARDSVMDKVFGLDSGASDYITKPFAIEELLARIR
>Desaci_0394_HK_Classic|Desulfosporosinus_acidiphilus_SJ4|Pair_Desaci_0393|HisKA_486-558/Desaci_0393_RR_NtrC|Desulfosporosinus_acidiphilus_SJ4|Pair_Desaci_0394|Response_reg_7-117	--GLLASGVAHEINNPLAIVAAHCEDLLDTTEEFKGGFKIVLEQIVRCKKITDRLLGFARKRS-ILILDDEEALRTIIAQRLKRKGY-EVLEAGTAQEGLSFLKETLIDAVLLDIKLPDGDGLALLPTFKQFQPDLQVVMLTGNGTIESAIEAMKLGAYDYLTKPCNLSELE----
>Desaci_0560_HK_Classic|Desulfosporosinus_acidiphilus_SJ4|Pair_Desaci_0559|HisKA_161-223/Desaci_0559_RR_NtrC|Desulfosporosinus_acidiphilus_SJ4|Pair_Desaci_0560|Response_reg_4-114	-LGHLSAGLAHEIRNPLGIMKVSIQLLQDEDREVLEYCRVLQEECERLNRLVSEFLSFARP---ILVADDEVNMRWVLERALTKAGY-DVETVADGQLAIERALSERPDLVLVDLKMPKADGLSVLRTLKEHYPDLLFVMMTAHGSTEIAVEAMKAGAHDYLMKPFEIDELLIT--
>Desaci_0656_HK_Classic|Desulfosporosinus_acidiphilus_SJ4|Pair_Desaci_0657|HisKA_11-75/Desaci_0657_RR_OmpR|Desulfosporosinus_acidiphilus_SJ4|Pair_Desaci_0656|Response_reg_6-115	--SHLIDYKSHEIRTYMTRIIGMTDLTLMLTEEQLDYLTVIKSSTKSLLKVLNDILDYSKILA-IVVAEDDDSIRKFLSILLTREGF-DVKVVERGTEVITECRISKPDLLLLDIMMPGMDGFEVCRNIRKES-NLPIIILTARENNEDKISGLILGCDDYITKPFDSTELVLRI-
>Desaci_0668_HK_Classic|Desulfosporosinus_acidiphilus_SJ4|Pair_Desaci_0669|HisKA_277-341/Desaci_0669_RR_OmpR|Desulfosporosinus_acidiphilus_SJ4|Pair_Desaci_0668|Response_reg_8-117	-MARFIGDASHELRTPLTSIRGFLEILLRDPETLTSAHKSMLTETERLIHLTEDLLTLNRLT--ILVVDDDLSIRQMLDLGLRKEGY-IVKTAANGQIALDLIPDFDPHLIILDLMMPVMDGNSLCQAVPEIS-QAPMIMLTAKNSATDIVIGLRQGANDYLTKPFHFEELLARIE
>Desaci_0688_HK_Classic|Desulfosporosinus_acidiphilus_SJ4|Pair_Desaci_0689|HisKA_184-251/Desaci_0689_RR_OmpR|Desulfosporosinus_acidiphilus_SJ4|Pair_Desaci_0688|Response_reg_3-113	-QQEFVADASHELRTPLSVVQLNLDIVKGTVASQSKWIDYSLLEIRRMSKLVDDLLFLARADS--LLIEDEPRLSEALAYILKKNNY-GVDTAFDGETGQTLAETGVYDLIILDRMLPRREGVELLKNLRRQGIHIPVLLLTAKDSIQDRIDGLDAGADDYLIKPFSTDELLARL-
>Desaci_0889_HK_Classic|Desulfosporosinus_acidiphilus_SJ4|Pair_Desaci_0890|HisKA_359-425/Desaci_0890_RR_OmpR|Desulfosporosinus_acidiphilus_SJ4|Pair_Desaci_0889|Response_reg_8-118	-RRDFVANVSHELRTPLSYLQGYSEALLDDEEKKRSYLETIHNETLRMRRLVNDLLELNRIQY-VLLVDDEAGLRELVQVYLENSGF-EVIEAADGLKAEAELKNEAFDLVILDVMMPQLDGLTLCRMIRSSQVDLPILLLTAKGEEADRLLGFEYGADDYVVKPFSPRELTARA-
>Desaci_0905_HK_Classic|Desulfosporosinus_acidiphilus_SJ4|Pair_Desaci_0906|HisKA_664-730/Desaci_0906_RR_OmpR|Desulfosporosinus_acidiphilus_SJ4|Pair_Desaci_0905|Response_reg_8-117	-RTALLNSISHDLRTPLASMIGAVTSLIEV-TSRQDLLETIKIGAMRMNKLVNNLLDMARLES-ILVIDDEPQIQRLLKVSLSVHGY-EVSEAIDANEGLSKIKQMKPDLIVLDLGLPDLDGIDVLTKVRETS-KVPVVVLTAREHENDKILAFDLGADDYVTKPFGMGELLARIR
>Desaci_1088_HK_Classic|Desulfosporosinus_acidiphilus_SJ4|Pair_Desaci_1089|HisKA_180-244/Desaci_1089_RR_OmpR|Desulfosporosinus_acidiphilus_SJ4|Pair_Desaci_1088|Response_reg_4-113	-RKTLIANISHDLKTPISSVQGYLEAILDSPEKVNKYLKTIYQNTVYIDKLIDDLFLFSKLD--ILIIEDDLNIAELERDYLCLNGY-DTEIVQDGIQGLKKALTGRYDVIIVDLMLPGKDGYQITKEIREKF-EIPVIIVSAKNEDIDKIRGLGFGADDYLTKPFSPAELTARVK
>Desaci_1717_HK_Classic|Desulfosporosinus_acidiphilus_SJ4|Pair_Desaci_1716|HisKA_290-352/Desaci_1716_RR_NtrC|Desulfosporosinus_acidiphilus_SJ4|Pair_Desaci_1717|Response_reg_5-115	ALGRLATGVAHELRNPIAIIKTLVELMKEQVSGIEEFTRAIEEQIDRQDFEIQELLDFGR----ILVVDDEERMCWALERALSHEGY-QVMTATRGLDGIRLAQTNEPSLVILDLKMPDIDGIEVLKELKALNSKIPVIMITAHGTIDTAIEAMKLGATDYITKPFKLEKIKVQV-
>Desaci_1775_HK_Classic|Desulfosporosinus_acidiphilus_SJ4|Pair_Desaci_1774|HisKA_286-351/Desaci_1774_RR_OmpR|Desulfosporosinus_acidiphilus_SJ4|Pair_Desaci_1775|Response_reg_9-117	-MRRFVADASHELRTPLTAIHGFLEVLLRQPDMLDRSLKSMYAESERMKKLVEDLLLLAKLD--ILLVDDEPNIIQFLEMGLLNEGF-EVQTAPDGMTGVNLAQQFHPHIVILDVMMPGMDGFEVCRMLKKTE-NVAIIMLTAKDEVDDRVKGLTLGADDYMVKPFSFEELLARI-
>Desaci_1955_HK_Classic|Desulfosporosinus_acidiphilus_SJ4|Pair_Desaci_1956|HisKA_657-725/Desaci_1956_RR_OmpR|Desulfosporosinus_acidiphilus_SJ4|Pair_Desaci_1955|Response_reg_14-121	--TALFNSLSHDLRTPLSSIIGAATGLLESPDARHDLLQTILQGAERMNRFVNNLLDMARLESGILIIDDETQIRRFLRVSLTSHGY-DVREAGTGQAGLEEVAMNNADLVILDLGLPDMNGMEVLNKIREWS-KVPIIILSVKEQETDKITALDHGADDYVTKPFSMGELLARM-
>Desaci_2380_HK_Classic|Desulfosporosinus_acidiphilus_SJ4|Pair_Desaci_2379|HisKA_403-469/Desaci_2379_RR_OmpR|Desulfosporosinus_acidiphilus_SJ4|Pair_Desaci_2380|Response_reg_5-114	-RRDFVANVSHEFRTPLTVIRGYLEAINDTWEDIQNVHRKILSETHSLERLVKDLLELSYLQSG-LIADDNESIVDILKSYVSKEGY-YPIVARDGEETLSKFAEYRPLLILLDVLMPKKDGFTVCREIRQNS-SVPIIMITSKGEDGDRIMGLDIGADDYIVKPFSPGEVMARIR
>Desaci_2556_HK_Classic|Desulfosporosinus_acidiphilus_SJ4|Pair_Desaci_2557|HisKA_117-177/Desaci_2557_RR_OmpR|Desulfosporosinus_acidiphilus_SJ4|Pair_Desaci_2556|Response_reg_1-108	---DSLADIAHQLRTPLTSVNLILSLLENDKNERKALIRETKELFEQMDWLLTSLLKLSRLDAG--LVEDDKTIAKNLMQLLSSEGF-SVTHAPTRGDAHAALAVNKFDLVLIDISLPDGNGFTVCTEIKETQ-DVPVIFLTASGDEASVVTGLNMGADDYITKPFRPRELIARIR
>Desaci_2563_HK_Classic|Desulfosporosinus_acidiphilus_SJ4|Pair_Desaci_2564|HisKA_132-197/Desaci_2564_RR_OmpR|Desulfosporosinus_acidiphilus_SJ4|Pair_Desaci_2563|Response_reg_4-114	-RQDFISDVSHEIQSPLTSISGFASLLKKNQSQISHYATIIEAESKRLSKLSENLLRLSNLES-VLVIDDDGYIRELICTVLKNEGF-SVTEAVNGRDALQKLGEEKIDLCVLDIMMPQMDGYEFCKQVRRYYEDMPVLMLTAKSELSQKVRGFEIGADDYLTKPFEVDELIVRI-
>Desaci_2779_HK_Classic|Desulfosporosinus_acidiphilus_SJ4|Pair_Desaci_2778|HisKA_237-294/Desaci_2778_RR_OmpR|Desulfosporosinus_acidiphilus_SJ4|Pair_Desaci_2779|Response_reg_3-112	-RKQFTADIAHELRTPLTSIKSYIEAFQDL-PADEENLSSIHEEIDRLVDLASDLRDLN-----ILVVDDEKKITSVLKAYLQQEGF-QVNTALNGIIALTMFKENPYDLVILDLMLPGMTGIEVCQEIRKIS-SVPIIMLTARVEEEDRIQGLSIGADDYITKPFSPREVVARV-
>Desaci_3575_HK_Classic|Desulfosporosinus_acidiphilus_SJ4|Pair_Desaci_3576|HisKA_240-306/Desaci_3576_RR_OmpR|Desulfosporosinus_acidiphilus_SJ4|Pair_Desaci_3575|Response_reg_8-118	-KNDFISSVSHELRTPLTSILGWAITLQNKKETLNDGLSIIAKESERLTHMVEELLDFSKF---ILVVEDEESIRRFITLNLFAAGY-QVDEAITGEEALPKLKTFCPEVVVLDLMLPGIGGLEVCQQIRVSAPETLVIILTAKGQDTDKILGLELGADDYMVKPFNPFELIARIK
>Desaci_3619_HK_Classic|Desulfosporosinus_acidiphilus_SJ4|Pair_Desaci_3620|HisKA_385-451/Desaci_3620_RR_OmpR|Desulfosporosinus_acidiphilus_SJ4|Pair_Desaci_3619|Response_reg_4-113	SRREFLASVTHELRTPLHLIQGYLEAIQDPKNQRGEYIDLVLEEAKRLARLVKDLQDINWLERGILIVDDEERIRSLVRLYLEREGF-AVEEAEDGSVALAKFKAGRFSLLIVDLMMPEIDGWRVCREIRESS-GIPIIMLTARGEEFDRVLGLELGADDYLVKPFSTKELVARVK
>Desaci_3743_HK_Classic|Desulfosporosinus_acidiphilus_SJ4|Pair_Desaci_3744|HisKA_229-294/Desaci_3744_RR_OmpR|Desulfosporosinus_acidiphilus_SJ4|Pair_Desaci_3743|Response_reg_4-116	MRTEFVANVSHELRTPLTSIKGFVETLLDVPSLRERFLKIIQAETLRLQRLIEDLLTLAHFEG-ILVVDDEEPIQELLRFNLEKEGY-QVRVAKDGPEALANLEKEQPDLLVLDVMLPGMDGLEVCRRLRLNPQQLPIIMLTAKGEEIDKVLGLELGADDYMTKPFSPRELLARIK
>Desaci_3883_HK_Classic|Desulfosporosinus_acidiphilus_SJ4|Pair_Desaci_3884|HisKA_159-225/Desaci_3884_RR_NtrC|Desulfosporosinus_acidiphilus_SJ4|Pair_Desaci_3883|Response_reg_4-113	-LGHMSAGLAHEIRNPLGIMKVSIQLLQEDDGVVSEYCRVMLEECERLNRLVSEFLTFARP---ILVADDEANMRWVLERALTKAGY-EVETVEDGQLAIDCALAERPDLVLVDLKMPKIDGLSVLHTLKEYYPDLLLVMMTAHGNTSTAVEAMKAGAQDYLMKPFDIDELLI---
>Desaci_3900_HK_Classic|Desulfosporosinus_acidiphilus_SJ4|Pair_Desaci_3899|HisKA_237-294/Desaci_3899_RR_OmpR|Desulfosporosinus_acidiphilus_SJ4|Pair_Desaci_3900|Response_reg_3-112	-RKQFTADIAHELRTPLTSIKSFIEAFQDL-PASPENLTSIHEEIDRLVDLSSDLKDLN-----ILLVDDEKKIITVLKAYLQQEGF-QVTTALNGLIALTLFKENTYDLIILDLMLPGMSGIEICREIRKIS-SVPIIMLTAKVEEEDRIQGLGIGADDYITKPFSPREVVARV-
>Desaci_3937_HK_Classic|Desulfosporosinus_acidiphilus_SJ4|Pair_Desaci_3938|HisKA_237-303/Desaci_3938_RR_OmpR|Desulfosporosinus_acidiphilus_SJ4|Pair_Desaci_3937|Response_reg_5-114	-RQALLSDVSHELRTPLTVIKGYSEAVLDSKEQQELYLQNISDESARLKRLVDDWLDLQTMDT-VLIADDDERIREIVKLYLEADGL-VIFEASNGKQVLDLVRNHSIDLILLDLMMPELDGWTVCKILRKET-QIPIIMLTAKGEENDRVLGFDLGADDYVVKPFSARELAARV-
>Desaci_3979_HK_Classic|Desulfosporosinus_acidiphilus_SJ4|Pair_Desaci_3980|HisKA_154-211/Desaci_3980_RR_OmpR|Desulfosporosinus_acidiphilus_SJ4|Pair_Desaci_3979|Response_reg_8-119	--KKVVSDIAHELRTPLTNLTGYLEALNTVIQGNPELYRSLHEEALHLTGLVEELHQL------VLIVEDDAKIRQLVKLYLEKEGY-EALEAEDGEDALDKFKQFDPCLVILDLMLPKLSGEEVCTMIRSDLSTVPIIMLTAKVEEAERIQGLKMGADDYVTKPFSPQELVTRVE
>Desaci_4198_HK_Classic|Desulfosporosinus_acidiphilus_SJ4|Pair_Desaci_4199|HisKA_248-313/Desaci_4199_RR_OmpR|Desulfosporosinus_acidiphilus_SJ4|Pair_Desaci_4198|Response_reg_8-117	-QKQFVANASHELRTPLMVIRGHADILQRDPLIVRDSATAVIEETKMMTKLVENLLTLAREE--VLLVEDDRAIAKVIALELEHHGH-SVVLAAEGRMGLDMALTQEWDVILLDLMLPFLNGYEICKQIRARK-DTPILLLTAKDEVQDKVFGLDIGADDYLTKPFAMDELMARIR
>Desaci_4383_HK_Classic|Desulfosporosinus_acidiphilus_SJ4|Pair_Desaci_4384|HisKA_238-301/Desaci_4384_RR_OmpR|Desulfosporosinus_acidiphilus_SJ4|Pair_Desaci_4383|Response_reg_5-114	-RRNMVADIAHELRTPLAVILGKLESIQEL-PSTPENILPIQDETLRLIRLVRDLQQLSLAEAGIVLVDDEAEILSLVRDYLTRDGF-TVVTALNGVEGMELIEKEKPDLVLLDWMLPGMSGLEMCKRLRETS-TIPIIMLTAKSEEIDRVLGLEFGADDYIVKPFSLRELAARIK
>Desaci_4492_HK_Classic|Desulfosporosinus_acidiphilus_SJ4|Pair_Desaci_4491|HisKA_236-291/Desaci_4491_RR_IclR|Desulfosporosinus_acidiphilus_SJ4|Pair_Desaci_4492|Response_reg_3-113	--GREVLHLVHDLKTPLAAIEGLVSLMETPDQKMQEYCQTIYRSINSMSAMVSEILYEDR----IIIMDDEQSLRYTLSEIFMFAGW-DPIAYPNGREGIEGFLSHGADIILVDYHMPEIDGLETVRLLREHDQQIPILVLTVDERQEIADRFLDAGATDFALKPVKAPDLIARVQ
>PB2503_01257_HK_Classic|Parvularcula_bermudensis_HTCC2503|Pair_PB2503_01262|HisKA_818-880/PB2503_01262_RR_unclassified|Parvularcula_bermudensis_HTCC2503|Pair_PB2503_01257|Response_reg_80-174	---HFAYIASHDLRAPLRGMDNVAQWIEEQIDDAKGKLLLLRGRVGRMNRLLTDVLAYSRAG--VFVIDDDELDILMYERVFQSAAVERAVNFSFAQSALEVLDSGEPELIFLDINMPGMSGFDFLRAIEDSPEMFPTVIMSTSDLAEDREQARSFDVIAYFTKP-----------
>PB2503_01397_HK_Classic|Parvularcula_bermudensis_HTCC2503|Pair_PB2503_01392|HisKA_519-590/PB2503_01392_RR_PrrA|Parvularcula_bermudensis_HTCC2503|Pair_PB2503_01397|Response_reg_5-116	-WGEVARRIAHEIKNPLTPIQLSAERLKRDREVFEACTDTIVRHVGDIGRMVAEFSSFARM---ILIVDDERDIRDLIAGILEDEGF-TPRTASDSDAVFAALRERCPALVILDIWLQGMDGLDILDALKQLYPDMPVIIISGHGNIETAIAAIRRGAYDFLEKPFNAEKLILT--
>PB2503_01967_HK_Classic|Parvularcula_bermudensis_HTCC2503|Pair_PB2503_01972|HisKA_248-306/PB2503_01972_RR_OmpR|Parvularcula_bermudensis_HTCC2503|Pair_PB2503_01967|Response_reg_6-115	--DAMLGAIGHDLRTPLTSLRLRAERIAD-----DELREQMIASLDAMALLLTDILAVAKTG--ILIVDDEASIREPLADYLAGHHY-DILRAKDGLEAREVCRTAQPDLVLLDIMMPGEDGLSLLREWQATG-GPPVILLTAMADDTDRIVGLELGADDYVTKPFNPRELVARIK
>PB2503_03987_HK_Classic|Parvularcula_bermudensis_HTCC2503|Pair_PB2503_03982|HisKA_347-412/PB2503_03982_RR_OmpR|Parvularcula_bermudensis_HTCC2503|Pair_PB2503_03987|Response_reg_4-113	---HFAADVSHELKNPLTSIRSAIETLDITEQARARLLAVIKQDVARMDRLITDISNASRLDA-IVLVDDDQNILTSVSIALESDGH-DVTTYEDGAEALEGIAAKEPELVISDIKMPRLNGIDLLKKLREKS-DVPLIFLTSKDEEIDEVLGLTLGADDYVKKPFSQRLFLERV-
>PB2503_04327_HK_Classic|Parvularcula_bermudensis_HTCC2503|Pair_PB2503_04322|HisKA_224-280/PB2503_04322_RR_PrrA|Parvularcula_bermudensis_HTCC2503|Pair_PB2503_04327|Response_reg_12-121	--GGLAAAAAHELGTPLATIQVTAREMERPDGPLKEDAQLLISQTQRCQRILTRLS---------LIVDDDQPFRTRLGRAMEKRGF-DPILAESVAEAVALINEHAPSYAVVDLRLEDGDGIEIVNKLHEKRPDARAIILTGYGNITTAVAAVKAGAIDYLAKPADADDVQKS--
>PB2503_05562_HK_Classic|Parvularcula_bermudensis_HTCC2503|Pair_PB2503_05567|HisKA_291-361/PB2503_05567_RR_CheY|Parvularcula_bermudensis_HTCC2503|Pair_PB2503_05562|Response_reg_4-108	SLTSFASLASHDLRAPLRQAGMFLDILKDE-GDTLEALSGLEAGLTRMRLMVSALFKLARLDT-ILVVDDDPIDQRFIARALDDDTV-RLEIASSGDEALHALDRPEPDLIVLDLMMPGIDGRRLLLQLEGHDSEIPVVVLSTANDPEEERFCLAHRARAYLVKP-DS--------
>PB2503_07394_HK_Classic|Parvularcula_bermudensis_HTCC2503|Pair_PB2503_07399|HisKA_150-209/PB2503_07399_RR_NarL|Parvularcula_bermudensis_HTCC2503|Pair_PB2503_07394|Response_reg_4-112	--SEMGASLAHELNQPLTAIDLFLTAAKRDPDKALTLFEEARREAQRAGEIIRRIRKM------IAIIDDDQGLRRALVALLEGSNR-ELVSYESGEAFLDEVADRTIDLAVLDLRLPGLSGIKVLERLRPLS--FPVVMMSANGDIRTAVDAIKLGATDFIEKPFTPEDLESLI-
>PB2503_08149_HK_Classic|Parvularcula_bermudensis_HTCC2503|Pair_PB2503_08144|HisKA_269-332/PB2503_08144_RR_OmpR|Parvularcula_bermudensis_HTCC2503|Pair_PB2503_08149|Response_reg_3-113	--RQVSDNIAHDLRSPLTRIKARLDRLQESDPNTQEVLEQTAVDVERLLATFNALLSITRIEAGILVVEDDADAAKFLIKGLREAGH-AVDHALDGDTGKNMAESGGYDAYVIDRMLPGIDGLTMLEMRRSAGDQTPALFLSALGEVDDRVAGLKAGGDDYLVKPYAFSELIARVE
>PB2503_12674_HK_Classic|Parvularcula_bermudensis_HTCC2503|Pair_PB2503_12669|HisKA_232-289/PB2503_12669_RR_OmpR|Parvularcula_bermudensis_HTCC2503|Pair_PB2503_12674|Response_reg_10-119	-RTEMLAGVSHDLKTPLTRLRLNLALQRE-----LEGAEEMTADIAEMERLLEDYLTFAREDA-ILVVDDDDRLRSLTARYLRENAF-LTSSAASAEAADRLMTLFHVDALVLDVMMPGEDGIAMTTRLRRHT-NTPILLLTARGQPEDRIAGLEAGADDYLPKPFEPRELVLRL-
>PB2503_00360_HK_Classic|Parvularcula_bermudensis_HTCC2503|Pair_PB2503_00355|HisKA_233-297/PB2503_00355_RR_OmpR|Parvularcula_bermudensis_HTCC2503|Pair_PB2503_00360|Response_reg_4-113	-LRRVTRDVAHDLRTPLSHLRQRLERVGATDGERQEGLALTEAKVEQILASFDAILRLAEIEAGILVIEDDEETASFIANGLKQEGF-AVDTAKTGTDGLFQATESPPDLVVVDRMLPGLDGVSVIKALRAAGVKIPVLFLTAMGAVEDRVAGLEAGGDDYLVKPFSFMELRARV-
>PB2503_00490_HK_Classic|Parvularcula_bermudensis_HTCC2503|Pair_PB2503_00485|HisKA_237-299/PB2503_00485_RR_OmpR|Parvularcula_bermudensis_HTCC2503|Pair_PB2503_00490|Response_reg_3-113	---RVTDDIAHELRTPIGRTLILIEEAQRD---ANSRLAEAHRELLHLAGTFDSLLTIAQIEN-VLIIEDDHKMAHYLGDGLTREGH-QIQAISTGPDGLEMALAQDFDVVVLDRMLPGLDGLSLLKRLRAAGRKMPVLLLTAMGGLDDRVEGLDAGADDYLVKPFAFSEAYARL-
>LMRG_02583_HK_Classic|Listeria_monocytogenes_10403S|Pair_LMRG_02584|HisKA_379-446/LMRG_02584_RR_OmpR|Listeria_monocytogenes_10403S|Pair_LMRG_02583|Response_reg_6-115	-RRDFVSNVSHELRTPLTSMHSYLEALSDDKEIAPRFLEVTQNETERMIRLVNDLLKLSRMDGGILVVDDEKTIADIVKFNLNKEGF-DVYCAYDGDEALELVEEVQPDLILLDIMLPGRDGIEVCREVRKKY-DMPIIMVTAKDSEIDKVIGLELGADDYVTKPFSNRELIARVK
>LMRG_01462_HK_Classic|Listeria_monocytogenes_10403S|Pair_LMRG_01463|HisKA_249-315/LMRG_01463_RR_OmpR|Listeria_monocytogenes_10403S|Pair_LMRG_01462|Response_reg_3-112	-RRQFIADVSHEMRTPLTTISGLTEGLVNPKSETDRCIALIDTEARRLTKLVNENLDYEKIRS--LMIEDNVSVCEMIEMFFMKEEI-NATFVHDGKMGYEAFFKDDYDIAIIDLMLPNMDGMTICRKIREVS-DVPIIILTAKESESDQVLGLEMGADDYVTKPFSPLTLMARIK
>LMRG_02685_HK_Classic|Listeria_monocytogenes_10403S|Pair_LMRG_02684|HisKA_238-304/LMRG_02684_RR_OmpR|Listeria_monocytogenes_10403S|Pair_LMRG_02685|Response_reg_4-114	SRQEFVANVSHELQSPLTSMQGFARLLGSTEKEQAEYLTVLSEETTRLSSLSKQLLTLASLDQ-ILVVDDDRHILKLVGHYLRAEGF-RVLEASDGVEAEKIVETEQVHLAVIDVMMPNMDGFELCQKMRASYPDIPVIMLTAKDALADKSRGFEVGTDDYVTKPFEPEELIFRI-
>PsycPRwf_0318_HK_Classic|Psychrobacter_sp._PRwf-1|Pair_PsycPRwf_0319|HisKA_268-329/PsycPRwf_0319_RR_OmpR|Psychrobacter_sp._PRwf-1|Pair_PsycPRwf_0318|Response_reg_4-113	-RKQMLSDISHELRSPLARLEVATELTRDFAPEASHYLDRIEKESARMNELIEHIIRIQSLQ--ILLGDDDKELTDLLQEYLTNHGI-RCDCAYDGEQVLNKIKSQPYDLIVLDIMMPKIDGLNVLRQLPTLT-QTPVIMLTAKGDEIDRIIGLELGADDYIAKPCNPRELLARIN
>PsycPRwf_0693_HK_Classic|Psychrobacter_sp._PRwf-1|Pair_PsycPRwf_0692|HisKA_255-323/PsycPRwf_0692_RR_OmpR|Psychrobacter_sp._PRwf-1|Pair_PsycPRwf_0693|Response_reg_4-114	--QRFTADASHELRSPLAALKLQADLLQQDDNQLFYHAQNISNGIERATHLVDQLLILAKIE--ILLIEDDSTIADGIVLGLKSHGM-MVDWFSDAKQGEIALQDGMFDAVLLDLTLPKGDGMTVLKNWRAKHIDTPVLIITARDAIANRVAGLNAGADDYLVKPFALDEVVARL-
>PsycPRwf_0704_HK_Classic|Psychrobacter_sp._PRwf-1|Pair_PsycPRwf_0705|HisKA_251-313/PsycPRwf_0705_RR_OmpR|Psychrobacter_sp._PRwf-1|Pair_PsycPRwf_0704|Response_reg_3-113	SLSRFSDNIAHELRTPIATLSTQTQVMLTKPRESDEYIEQLHHQHDQLSAMINDMLLLAKTQ--VLLVEDEKNLGEYIKKGLTEAGF-IVDHHMTGLDGYHALMTEDFSVVVMDVMLPDVSGFELIQRYRAAGKHTPVLFLTAKDDLSDRIKGIEIGGDDYLTKPFAFAELIVRI-
>PsycPRwf_0965_HK_Classic|Psychrobacter_sp._PRwf-1|Pair_PsycPRwf_0966|HisKA_348-409/PsycPRwf_0966_RR_OmpR|Psychrobacter_sp._PRwf-1|Pair_PsycPRwf_0965|Response_reg_38-158	---DYVHTLTHELKSPLTAIRASGELLEELDGEDRLLSQTITEQSIKLQSLIDRLLLLAKIEQ-ILIVEDDPAIATSLRVTFKREGW-QVTWLDNASSVIPTLKHFNLSGIVLDVGLPDGDGLSLCQDIRHSEKQLPIVFLTARSDEVDRILGLEMGGDDYCPKPFSPRELVARL-
>PsycPRwf_1046_HK_Classic|Psychrobacter_sp._PRwf-1|Pair_PsycPRwf_1047|HisKA_232-293/PsycPRwf_1047_RR_OmpR|Psychrobacter_sp._PRwf-1|Pair_PsycPRwf_1046|Response_reg_4-115	---LFTGDVSHELRTPLTIIMGASEVLQADHPKALEFTQRINTTAKETSEIISALLLLSRA---ILIIEDNPDIVANVYAFFEPKGY-QLDNAHNGPSGLTLAAENTYDVILLDVMLPGMDGTQLCKALREKLNKTPVLMLTARDTLSDKVAGFDSGADDYLVKPFSLVELEVRV-
>PsycPRwf_1804_HK_Classic|Psychrobacter_sp._PRwf-1|Pair_PsycPRwf_1805|HisKA_148-219/PsycPRwf_1805_RR_NtrC|Psychrobacter_sp._PRwf-1|Pair_PsycPRwf_1804|Response_reg_14-124	--REMLRSVAHEVKNPLAGIRGAAQLLIKDAKKLTTYANIVISETDRLTQLIEQLL----------LIDDDPALRLILEDSFSDAGL-QVQAFSNAKGAWARLE--PPDVILTDIRMPMMDGLSFSQWMHTNFPSLPVIIMTAHSDLKSAVDSYDTGAFEYLPKPFDLDH------
>PsycPRwf_2092_HK_Classic|Psychrobacter_sp._PRwf-1|Pair_PsycPRwf_2093|HisKA_299-365/PsycPRwf_2093_RR_OmpR|Psychrobacter_sp._PRwf-1|Pair_PsycPRwf_2092|Response_reg_6-119	MRKDFVGNVSHELRTPLTVIMGYIETFSDLDPKWRRGFSLMTQQTVRMNQIINDLLLLSRLEN-ILVVEDEPAIREMIVTTLEMAGF-ECLQAEDVSEAHSQVVDHRPAMILLDWMLPGQSGIDLCRRLKKDESEIPIIMLTARGEEDNKVQGLDAGADDYITKPFSTRELVSRIK
>PsycPRwf_2161_HK_Classic|Psychrobacter_sp._PRwf-1|Pair_PsycPRwf_2160|HisKA_245-316/PsycPRwf_2160_RR_OmpR|Psychrobacter_sp._PRwf-1|Pair_PsycPRwf_2161|Response_reg_5-121	--NLLLAHASHELRTPITRIRLQIEMMEMTKAKFHKRAQAVNRDLTGLNDLVESILLVSRLDAGILLIEDDPDLAELISDYLAMNYY-EVHHAPTGQEGLDILKERAIDLIILDLMLPDMDGMQVCQKIRGGKNKVPIVMLTAKGDTTDRVLGLEMGADDYISKPFEPRELLARIR
>SOR_0087_HK_Classic|Streptococcus_oralis_Uo5|Pair_SOR_0086|HisKA_119-176/SOR_0086_RR_OmpR|Streptococcus_oralis_Uo5|Pair_SOR_0087|Response_reg_5-115	-KRMMIAQLSHDIKTPITSIQVTVEGILDKEEERLHYLATIGRQTERLNKLVEEL---------ILLVDDEIDILDIQNRYLIQAGY-DVLVAHDGKEGLELFRKKSIDLIITDIMMPNMDGYDFISEVQYIAPDQPFLFTTAKTSEQDKIYGLSLGADDFIVKPFSPRELVLRV-
>SOR_0949_HK_Classic|Streptococcus_oralis_Uo5|Pair_SOR_0948|HisKA_208-273/SOR_0948_RR_OmpR|Streptococcus_oralis_Uo5|Pair_SOR_0949|Response_reg_4-113	-RRLFVSNVSHELRTPLTSVKSYLEALDEYDPVAPDFIKVSLDETNRMMRMVTDLLHLSRIDN-ILIVDDEKPISDIIKFNMAKEGY-EVVTAFNGREAIELFEAEQPDIIILDLMLPEIDGLEVAKAIRKTS-SVPIIMLSAKDSEFDKVIGLELGADDYVTKPFSNRELQARV-
>SOR_1194_HK_Classic|Streptococcus_oralis_Uo5|Pair_SOR_1195|HisKA_216-283/SOR_1195_RR_OmpR|Streptococcus_oralis_Uo5|Pair_SOR_1194|Response_reg_4-113	--KSFVENASHELRTPLAVLQNRLENLFRTIMESSESIASSLEEVRNMRFLTTNLLNLARRDDGILLVEDDLGLSNSVFDFLD--NFADVMQVFDGEEGLYEAESGVYDLILLDLMLPEKNGFQVLKELREKGITTPVLIMTAKESLDDKGHGFELGADDYLTKPFYLEELKMRI-
>SOR_1435_HK_Classic|Streptococcus_oralis_Uo5|Pair_SOR_1436|HisKA_231-296/SOR_1436_RR_OmpR|Streptococcus_oralis_Uo5|Pair_SOR_1435|Response_reg_3-112	-KVEFLRGASHELKTPLASLKILIENMKEY-KDRDHYLGVALGIVDDLSHHVLQILSLSSVQ--ILIVEDEEMIREGISDYLTDCGY-ETIEAADGQEALEKFSSYEVALVLLDIQMPKFNGLEVLAEIRKSS-QVPVLMLTAFQDEEYKMSAFASLADGYLEKPFSLSLLKVRV-
>LJP_0635_HK_Classic|Lactobacillus_johnsonii_DPC_6026|Pair_LJP_0634|HisKA_194-252/LJP_0634_RR_OmpR|Lactobacillus_johnsonii_DPC_6026|Pair_LJP_0635|Response_reg_3-113	-QREFITNAGHELKTPLAIIAANTEMEEML-GNNSEWNKSTKEQVDRLTRLINRLIALARTG--ILLAEDEEQLSRVLVAAMQSVNY-EVDPVFNGRDAVELARKNSYDVIILDIMMPVMDGITALKEIRKSGDKTYVLMLTAKAEVDDRVTGLDSGADDYLTKPFSLKELLARL-
>LJP_1233c_HK_Classic|Lactobacillus_johnsonii_DPC_6026|Pair_LJP_1234c|HisKA_253-319/LJP_1234c_RR_OmpR|Lactobacillus_johnsonii_DPC_6026|Pair_LJP_1233c|Response_reg_4-116	-REQFMADAAHEMRTPLTTINGLLEGFEYPEEAKPKSIALMHSETKRLIRLVNENLDYEKIRN-ILMVEDDNSVAEMMKMFFSKEQW-DVDIAKDGVEAVEMFKADPYDIVTLDLNLPKKDGIEVAKEIRAISISIPIIMLTARDSETDQILGLGIGADEYVTKPFSPLALIARIK
>BLA_1507_HK_Classic|Bifidobacterium_animalis_subsp._lactis_AD011|Pair_BLA_1506|HisKA_135-198/BLA_1506_RR_OmpR|Bifidobacterium_animalis_subsp._lactis_AD011|Pair_BLA_1507|Response_reg_14-121	-RRDMIANVAHELRTPVSALQAMVENMADV-EPNEKNMESILAQTHRLTDLISFLLDLSRIEAGILVVEDEPTLATAIAQRLTNEGW-TARVAGDGATAVKAADKLHPDLIIMDLMLPVMDGIEATKRIEAQH-PIPVLMLTARDDEADVVIGLGVGADDYMSKPFSMRELVAR--
>PSM_B0076_HK_Classic|Pseudoalteromonas_sp._SM9913|Pair_PSM_B0075|HisKA_214-274/PSM_B0075_RR_OmpR|Pseudoalteromonas_sp._SM9913|Pair_PSM_B0076|Response_reg_3-113	---FFASDAAHELRTPLSSLKINVHNLAA-QQGDNQELQAMTQGINRLTNIVEQMLILGRTQ---LLVEDDHLVAQGLCRSLRQEGY-SVEHSATVKHALQCLGSGEIELVILDLGLPDGDGSQILKHIKAQKKVIPVVILTARSSIDDKVQGLDMGADDYLAKPFEPAELFARL-
>PSM_B0432_HK_Classic|Pseudoalteromonas_sp._SM9913|Pair_PSM_B0433|HisKA_354-416/PSM_B0433_RR_NtrC|Pseudoalteromonas_sp._SM9913|Pair_PSM_B0432|Response_reg_10-115	--GQLSAGINHEINQPLSAMNTYLASAKIL-NALNENLIIIENLVERVHKIVAQLKHFSK----IIVIDDEAMIRDSLNQLLTLEGY-EVQCFSDASVALSRLNRSFCGIVLSDINMPTMDGLTFIDQVKAFDSELPVIFLTGYADVSVAVKAMQLGAYDLFEKPLNENLL-----
>PSM_A0179_HK_Classic|Pseudoalteromonas_sp._SM9913|Pair_PSM_A0178|HisKA_139-194/PSM_A0178_RR_NtrC|Pseudoalteromonas_sp._SM9913|Pair_PSM_A0179|Response_reg_6-114	--RNLIRGLAHEIKNPLGGIRGAAQLLQYDQQERDQCAELIIEQADRLRELVDRLLG---------LVDDDASIRFVLEKALTRAGF-EVESFADAQNVLNALKFSQPSVLISDVRMPGMDGMALLELIAEQTPGLPVIIMTAHSDLDSAVNAFQKGAFEYLAKPFDLNEAVALV-
>PSM_A1809_HK_Classic|Pseudoalteromonas_sp._SM9913|Pair_PSM_A1808|HisKA_233-296/PSM_A1808_RR_NtrC|Pseudoalteromonas_sp._SM9913|Pair_PSM_A1809|Response_reg_4-119	----VIRIISHELNNPMSSMLHSAQLLTQDEPRLKRVFTTIEERIKHLNEFVQGYGRFA-----ILIVDDNPAILDALSLLLEIHDY-KVVTANSPFEAIQIVQYQRIALVLQDMNFSNDEGKLLFYQLRELNPHLPIILITAWTELETAVELVKAGAADYLPKPWDDAKLLTCV-
>PSM_A2184_HK_Classic|Pseudoalteromonas_sp._SM9913|Pair_PSM_A2183|HisKA_212-273/PSM_A2183_RR_OmpR|Pseudoalteromonas_sp._SM9913|Pair_PSM_A2184|Response_reg_7-116	----MASSLSHDIRTPIACLRFGVDAALDDESKIKHYLTRMETDLDHMESMLKSYLTFATLEQ-ILLVEDDISLAQWVTEYLTEQGY-VVHVCHRGDEVISQVKRLNPQLILLDIMLPGLDGISVCRDLRSFY-HAPIIMLTARDEEMDEVIGLEVGATDYIIKPVRPRALLARIK
>PSM_A2192_HK_Classic|Pseudoalteromonas_sp._SM9913|Pair_PSM_A2193|HisKA_196-261/PSM_A2193_RR_OmpR|Pseudoalteromonas_sp._SM9913|Pair_PSM_A2192|Response_reg_4-112	-QQELTSSVSHEFRTPLARLKFAIAILEDHDTKAQQYLSDMQMDIHELESLVSEMLEYARLDT-ILLVEDDLGLQQLTKDYLEHNGL-EVDVLERGDEVFPYLSENHVDLIILDVMLPGKDGFSVCRQVRDKY-TLPILMLTAKGEDFDQVIGLELGADDYVIKPAEPRVLLARI-
>PSM_A2259_HK_Classic|Pseudoalteromonas_sp._SM9913|Pair_PSM_A2258|HisKA_144-206/PSM_A2258_RR_NtrC|Pseudoalteromonas_sp._SM9913|Pair_PSM_A2259|Response_reg_5-114	ALGKMVASLAHQVRTPLSAAMLYAANLKRPEASRGSFHTKLMSRLKDLETQVNDMLLFAKSG--ILVVEDDAGLREALIDTLEMSGI-ACMAANSAEQAMVLLKKEAFSLVVSDVQMGAMSGLDLLRSIKLNYPDLPVLMMTAYATIDDAVEAMRLGAIDYMAKPFAPEVLLNMV-
>PSM_A2434_HK_Classic|Pseudoalteromonas_sp._SM9913|Pair_PSM_A2433|HisKA_490-553/PSM_A2433_RR_OmpR|Pseudoalteromonas_sp._SM9913|Pair_PSM_A2434|Response_reg_4-115	--ENMSSRLSHELRTPVAVVRSSLENLQSQSELSQKYLERASEGVERLGKIITTMSEATRLEQ-IAIIEDETAIRENYIEMLSAQGY-QVSGYENRPQAEAAFKEALPDLAIVDIGLGHDGGFLLCQTLRSLSKTLPIIFLTARDSEIDTVCGLRMGADDYLTKDISLAHLAARI-
>PSM_A2462_HK_Classic|Pseudoalteromonas_sp._SM9913|Pair_PSM_A2463|HisKA_205-270/PSM_A2463_RR_OmpR|Pseudoalteromonas_sp._SM9913|Pair_PSM_A2462|Response_reg_5-117	MRKDFVANVSHELRTPLTVVTGYLEMLDSPPAMWNKAQTTMLEQCKRMDSLVNQLLSLSRIEG-VLVVDDEAPIREMLVFVLEQNGF-QAIEAEDYDSAIAAMVEPYPDMVLLDWMLPGGSGIQIAKKFKQNERQIPIIMLTARGEEEDKIRGLEVGADDYVTKPFSPKELMARIK
>PSM_A2717_HK_Classic|Pseudoalteromonas_sp._SM9913|Pair_PSM_A2716|HisKA_252-316/PSM_A2716_RR_OmpR|Pseudoalteromonas_sp._SM9913|Pair_PSM_A2717|Response_reg_3-112	-QKRLLADISHELRSPLTRLKMATGLAQMASEASQSYLLRIEKEANQLDKMIADVLQVSRLEA--LMIDDDTGLCELLSEYLSAQGF-SIQTAHDGQQGLELALQNDYALILLDVMLPSIDGFEVLKQLRQSK-LTPVIMLTAKGEDFDRIFGLELGADDYIPKPFNHRELLARVK
>PSM_A2916_HK_Classic|Pseudoalteromonas_sp._SM9913|Pair_PSM_A2917|HisKA_225-280/PSM_A2917_RR_OmpR|Pseudoalteromonas_sp._SM9913|Pair_PSM_A2916|Response_reg_8-118	-RRLLMAGVSHDLRTPLTRIRLATEMMVD---EDDYLREGIIYDIEDMNGIIDQFIEY------VLVVDDDKRLRSLLERYLVEQGF-IVRTAADSQQMDRLIERENFHLMVLDLMLPGEDGLSICRRLRQKENQIPIVMLTAKGDEVDRIIGLELGADDYIPKPFNPRELLARIK
>SAIN_0611_HK_Classic|Streptococcus_anginosus_C1051|Pair_SAIN_0610|HisKA_239-303/SAIN_0610_RR_OmpR|Streptococcus_anginosus_C1051|Pair_SAIN_0611|Response_reg_4-113	-KAEFLRMTSHELKTPITSMMGIVDGMIYDFKDKDKYLHKCREILEEQSKLVQSILAISKIE--ILVVEDDTTINQVICEFLKENHY-EVTPVFDGAEALREFEEKSFDLIILDVMLPSMSGLDVLKEIRKTS-QVPVMMLTALDDEYTQLVSFNHLISDYVTKPFSPLILMKRI-
>SAIN_0680_HK_Classic|Streptococcus_anginosus_C1051|Pair_SAIN_0679|HisKA_208-273/SAIN_0679_RR_OmpR|Streptococcus_anginosus_C1051|Pair_SAIN_0680|Response_reg_4-113	-RRLFVSNVSHELRTPLTSVKSYLEALDESEPVAPDFIKVSLDETNRMMRMVSDLLSLSRIDN-ILVVDDEKPISDIIKFNMVKEGY-EVVTAFDGREALEMFEAERPDILILDLMLPELDGLEVARTIRKTS-NVPIIVLSAKDSEFDKVIGLEIGADDYMTKPFSNRELQARV-
>SAIN_0922_HK_Classic|Streptococcus_anginosus_C1051|Pair_SAIN_0923|HisKA_228-281/SAIN_0923_RR_OmpR|Streptococcus_anginosus_C1051|Pair_SAIN_0922|Response_reg_8-118	MKEQWIRGVSHDLRNPLMLISGYNSQLEQY--GKGKQTEEIENQIQTMKEMISNLN--------ILILDDNPEILEMVQESLNIAGFSNLTSVQSQKEALEQFEEKSFDLVILDIMLPEGSGFEVLKGIRKTS-TVPVLFLSAISDIEKQYQGFELGADDYIIKPFRPRDLELRI-
>SAIN_1568_HK_Classic|Streptococcus_anginosus_C1051|Pair_SAIN_1569|HisKA_84-141/SAIN_1569_RR_OmpR|Streptococcus_anginosus_C1051|Pair_SAIN_1568|Response_reg_4-111	-----ISNIAHDIRTPLTIASGYTQQLIKGKEENEQLLKIAT----------------------ILIIEDNNDIHDILKDLFETEHR--VFSAYSGTEGLLLFAQEAIDLVLLDIMLPGKNGDQVLAEIRKNS-QIPVVMLTALGEKSLVSQYLLDGANDYIVKPFDLDEVFARV-
>SAIN_1708_HK_Classic|Streptococcus_anginosus_C1051|Pair_SAIN_1709|HisKA_119-176/SAIN_1709_RR_OmpR|Streptococcus_anginosus_C1051|Pair_SAIN_1708|Response_reg_5-114	-KGLMIAQLSHDIKTPLTSIQASVEGMLDAADEQQYYLKTISRQTDRLNKLVEEL---------ILLVDDEVEITEINKRYLTQAGY-EVNVAHDGQEALELFKKYPTDLIVTDIMMPNMDGYDLIGEVQYLAPEQPFLFITAKTSEPDKIYSLSMGADDFITKPFSPRELVLRV-
>Slit_0012_HK_Classic|Sideroxydans_lithotrophicus_ES-1|Pair_Slit_0013|HisKA_487-556/Slit_0013_RR_PrrA|Sideroxydans_lithotrophicus_ES-1|Pair_Slit_0012|Response_reg_6-116	-WGEVARRLAHEIKNPLTPIQLSAERLQHDSQLLQRATQTIVSQVAAMKNMVTEFANYARA---ILVVDDEVGIRELLSEILFDEGY-RIHLAENASQARTFRENHTPDLVLLDIWMPDTDGLSLLKEWAQERLTMPVIMMSGHGTIETAMEAMRIGASDFLEKPIALQKLLATV-
>Slit_0331_HK_Classic|Sideroxydans_lithotrophicus_ES-1|Pair_Slit_0330|HisKA_205-272/Slit_0330_RR_OmpR|Sideroxydans_lithotrophicus_ES-1|Pair_Slit_0331|Response_reg_6-118	MRRDFVANVSHELRTPLTVVNGFVETMQDENDMARRALQLMGNQTSRMKSLVDDLLTLSRLEN-ILLVEDEPAIQELLAFNVAQCGF-RAIQAYDVPSALVEINRALPDLILLDWMLPGTSGVELARRLRADARDIPIIMLTARIDERDKILGLESGADDYITKPFSPRELMARIR
>Slit_0483_HK_Classic|Sideroxydans_lithotrophicus_ES-1|Pair_Slit_0484|HisKA_241-295/Slit_0484_RR_OmpR|Sideroxydans_lithotrophicus_ES-1|Pair_Slit_0483|Response_reg_10-119	--TGMLAAITHDLQTPLTRLRLRLEKLPD-----EALRNKLVGDMQAMQQMLQEGLELSR----ILIVDDDEDIRNLLADYLGEQGW-LISTAQDGTAMQQVLDSTPIDLIVLDLTLPGSDGLTLCRDLRARS-AIPVIMLTARSAPLDRILGLEMGADDYLCKPFEPRELLVRI-
>Slit_0730_HK_Classic|Sideroxydans_lithotrophicus_ES-1|Pair_Slit_0729|HisKA_225-286/Slit_0729_RR_PrrA|Sideroxydans_lithotrophicus_ES-1|Pair_Slit_0730|Response_reg_9-117	-LGTQAAGAAHELGTPLSTMSVVIGEMRNTSPEQQDNLIILDEQVRNCKRILDTLLSHARE----LLVDDDATFRSVLSRALEKRGF-AVTTADSVEQALPLASANPPEYAVLDLKMDGASGLVLVQKLHELDAATRIVVLTGYASIATAVEAIKLGATQYLSKPANADEIVAA--
>Slit_1012_HK_Classic|Sideroxydans_lithotrophicus_ES-1|Pair_Slit_1013|HisKA_231-293/Slit_1013_RR_OmpR|Sideroxydans_lithotrophicus_ES-1|Pair_Slit_1012|Response_reg_3-113	--RRFTADAAHELRTPVAAIKAQAQVARTAETERAHALDNAILGCDRAAHLIEQLLTLARIDT-ILVIEDDALLGDAIQAGLKQSGY-AVDWMKDGVSADQALSTEAYAAAVLDLGLPRMSGLEVLQRLRSRNTPIPVLILTAMDTVEDRIKGLDAGADDYLVKPFDMGELAARL-
>Slit_2388_HK_Classic|Sideroxydans_lithotrophicus_ES-1|Pair_Slit_2389|HisKA_276-340/Slit_2389_RR_OmpR|Sideroxydans_lithotrophicus_ES-1|Pair_Slit_2388|Response_reg_6-115	--SSILSALSHDIRTPLTVLYGMADTLAQLPDALHEMADAMRQQTLRLNSMVSNLLDMAKLRAGILLIEDEAQIRRLVRAALEEEGY-RVLECGTLKEGLSQLHADNIQLLILDLGLPDGDGIAFIRELRTQF-ALPVLVLSARSAEGEKIRALDAGADDYLTKPYSTGELLARV-
>Slit_2493_HK_Classic|Sideroxydans_lithotrophicus_ES-1|Pair_Slit_2492|HisKA_237-302/Slit_2492_RR_OmpR|Sideroxydans_lithotrophicus_ES-1|Pair_Slit_2493|Response_reg_3-114	-QQRFVADAAHQLRTPFAGLKTQSELALRAPERKQHALEHIHTSTQHGIRLVNQLLALARNEPGILIAEDDEVLSDGLCHSMRQSGY-AVDCVKDGHSANLILSGEQFDLVILDLGLPKVDGFSVLRSLREKNRQVPVIILTARDAEGDRVKGLDLGADDYMIKPFSLPELEARV-
>Slit_2634_HK_Classic|Sideroxydans_lithotrophicus_ES-1|Pair_Slit_2633|HisKA_325-388/Slit_2633_RR_PrrA|Sideroxydans_lithotrophicus_ES-1|Pair_Slit_2634|Response_reg_11-120	ALGRLTANIAHEVRNPLSSISYATELLKEHDPAQARLFQIILDNTSRLNRIVQDVMLVNRRD--VLVVDDEADILELLELALVRMGL-EVVRASNVRQAKECLDSGSFDLCLTDMRMPDGEGLEVVRYISERGLDVPVAVITAHGNLENAVAVLKAGAFDYLSKPVALDQLRTLV-
>Slit_2925_HK_Classic|Sideroxydans_lithotrophicus_ES-1|Pair_Slit_2926|HisKA_129-187/Slit_2926_RR_NtrC|Sideroxydans_lithotrophicus_ES-1|Pair_Slit_2925|Response_reg_7-115	--RLLLRNLAHEIKNPLGGIRGAAQLLEQEKPALREYTQVVIQEADRLRSLMEKLLTP------VWIIDDDRSIRWVLEKALAREEI-EYKSFASADEALEELPGNLPQMVISDIRMPGSSGLELLQKLRNDYPNLPVIIMTAYSDLESAVSAFQGGAFEYLPKPFDVNHAVELI-
>Sca_0303_HK_Classic|Staphylococcus_carnosus_subsp._carnosus_TM300|Pair_Sca_0302|HisKA_119-176/Sca_0302_RR_OmpR|Staphylococcus_carnosus_subsp._carnosus_TM300|Pair_Sca_0303|Response_reg_3-112	---QSLTHFVHEMKTPLTAMKLLIEK-----EKDKENKNALLFEWSRLNEMLDNQLYLVRLDS-ILLVEDDKTLFEQLKKELEHWDL-HVEGIENFDDVLTEAKTKNPEIIIMDVELPKYDGFYWCRQIRHES-NVPILFLSARDNPMDQVMSMELGADDFIQKPFYTNVLIAKL-
>Sca_1059_HK_Classic|Staphylococcus_carnosus_subsp._carnosus_TM300|Pair_Sca_1060|HisKA_233-296/Sca_1060_RR_OmpR|Staphylococcus_carnosus_subsp._carnosus_TM300|Pair_Sca_1059|Response_reg_4-113	-QTQFVEDASHELRTPLQIIQGHLNLIKRDPEILEESLNITIEEMNRITKLVEELLMLTKE---ILIVEDEQNLARFIELELIHENY-EVDIENDGAEGLKTALSKEYDLYLLDLMLPHMDGLEICRKIREVK-STPIIIITAKGDTYDKVAGLDYGADDYIVKPFDIEELLARIR
>Sca_1117_HK_Classic|Staphylococcus_carnosus_subsp._carnosus_TM300|Pair_Sca_1118|HisKA_356-423/Sca_1118_RR_OmpR|Staphylococcus_carnosus_subsp._carnosus_TM300|Pair_Sca_1117|Response_reg_4-113	MKKDFIANVSHELRTPIALLQGYTESIVDEPDEIRDSLSIVLDETQRLNRLVNELLNVARMDA-ILVVDDEERIRRLLKLYLERESF-DIEEAQDGKEALDMALNTDYACILLDLMLPELDGIEVANRLREYK-DTPIIMLTAKGEETNRVEGFESGADDYIVKPFSPREVVLRV-
>Sca_1298_HK_Classic|Staphylococcus_carnosus_subsp._carnosus_TM300|Pair_Sca_1299|HisKA_343-409/Sca_1299_RR_OmpR|Staphylococcus_carnosus_subsp._carnosus_TM300|Pair_Sca_1298|Response_reg_5-115	-RREFVANVSHELKTPITSIKGFAETLIDDENSLDEFLNIILKESNRIESLVEDLLDLSHIEQ-ILVVDDEQSIVTLLKYNLETAGY-IVEVAYDGEEALQKLDAVQPDLVVLDVMLPKLDGIEVCKTIRSDKNLVPILMLTAKDDEFDRVLGLELGADDYMTKPFSPREVVARV-
>Sca_1864_HK_Classic|Staphylococcus_carnosus_subsp._carnosus_TM300|Pair_Sca_1863|HisKA_239-304/Sca_1863_RR_OmpR|Staphylococcus_carnosus_subsp._carnosus_TM300|Pair_Sca_1864|Response_reg_5-113	-RQHFVQNVSHEIKTPLTHIHQLLNRLSTDNEKDRTYISEIYATTNRLSNLTHALLLLAELDN--LIVDDDYQILHYVSSYLEKEGF-KTVTYSNAEDALKYLDKQHVDIAIIDIMMNGMDGFELCQEIKDNY-TLPVIMLTARDALSDKEEAYLTGTDDYVTKPFEVQELIFRI-
>Sca_2455_HK_Classic|Staphylococcus_carnosus_subsp._carnosus_TM300|Pair_Sca_2456|HisKA_376-441/Sca_2456_RR_OmpR|Staphylococcus_carnosus_subsp._carnosus_TM300|Pair_Sca_2455|Response_reg_5-114	-RREFVANVSHELRTPLTSMNSYLEALEEDEEIAPQFLSVTREETVRMIRLVNDLLQLSKMDN-VVVVDDEKPIADILEFNLKKEGY-EVFCAYDGNDAIDLIYEEEPDIVLLDIMLPGRDGMEVCREVRKKY-EMPIIMLTAKDSEIDKVLGLELGADDYVTKPFSTRELIARVK
>HMPREF0675_4376_HK_Classic|Propionibacterium_acnes_SK137|Pair_HMPREF0675_4377|HisKA_247-311/HMPREF0675_4377_RR_OmpR|Propionibacterium_acnes_SK137|Pair_HMPREF0675_4376|Response_reg_10-119	-QQQFVSDVSHELRTPMTTMRMASEMVEADDPVQVRSVELMRAQMERLELLLADLLEISRFDAGILVVDDDAALAEMLQLVLIKEGF-STAWVGHGSDVMDVFREHRPALVLLDLMLPGRDGIRICQDIRRES-GVPIIMLTARTDTPNVVQGLGAGADDYVCKPFRSAELIARIR
>Slin_0190_HK_Classic|Spirosoma_linguale_DSM_74|Pair_Slin_0191|HisKA_232-301/Slin_0191_RR_LytTR|Spirosoma_linguale_DSM_74|Pair_Slin_0190|Response_reg_4-113	SREHFIGIIAHDMRKPLISFRGMADLINMY-QDVEQVSQAIDSAGLAIETMLDNLL--------ILILEDNLLDKIKLKGMLRELEYMNISTVSTIEQAQQIITTQPPLLLIVDVYLEGETGTDIIDTALANS--VPILFVSASKDIAIYNGIPNKHLYGYLTKPIDPITLHATI-
>Slin_0383_HK_Classic|Spirosoma_linguale_DSM_74|Pair_Slin_0384|HisKA_523-589/Slin_0384_RR_CheY|Spirosoma_linguale_DSM_74|Pair_Slin_0383|Response_reg_4-116	--DAFSYTVSHDLRTPLSSIRCYAEILLEFTPDAQALFQKVIDSTERMRRLIRHILYYSRMG--VLYVEDNLHDADIFCRLIGLSRPVTYTVVHSGSEALDYLEQQKPKLVLLDINLIGLSGIDVIEQTRSFERFLPIVVFSTSDNPRDIQSAYQAGINAYVVKPGS---------
>Slin_0466_HK_Classic|Spirosoma_linguale_DSM_74|Pair_Slin_0465|HisKA_213-278/Slin_0465_RR_OmpR|Spirosoma_linguale_DSM_74|Pair_Slin_0466|Response_reg_3-113	SLKEFTENASHEMQTPLALINAKVEQLQSLTETQTHWIERIYQASRRISRLNQGLLLLAKIEN-VLVVEDEQGLAESITEYMVKDGY-VCETASTFREAEEKIHLYTYDCVIVDLTLPDGNGFQIIEALKRLIATTGVIIISARDALEDKLRGLEIGSDDYLTKPFHLSELNARV-
>Slin_0731_HK_Classic|Spirosoma_linguale_DSM_74|Pair_Slin_0732|HisKA_231-292/Slin_0732_RR_OmpR|Spirosoma_linguale_DSM_74|Pair_Slin_0731|Response_reg_9-119	-QRTFVSHASHELRTPLTAITGQLEVLLAL-DELRATVQSVLEDVRDLNRLTNGLLSLA------LVVEDETKVALFIKKGLETQSL-TVTVAADGREGKRLISSERFDLVILDVNLPFVSGLELAEYIRTKNAQMPILMLTALDSTTDKLMGFEAGADDYLAKPFDFLELVARV-
>Slin_1270_HK_Classic|Spirosoma_linguale_DSM_74|Pair_Slin_1271|HisKA_180-247/Slin_1271_RR_unclassified|Spirosoma_linguale_DSM_74|Pair_Slin_1270|Response_reg_4-116	-KSRFVSMASHEFRTPLSAILTSASLVEKPRVEQQEHIQRIRMSVNHLNDILEEFLSVGRLEEGILLIEDNDIIRENTAEILELSGY-RVTTANNGKAGIELALVDRPDLIICDIMMPVLDGYGVLHIVNKNPTGIPFIFLTAKSERDDFRRGMELGADDYLTKPFSESELLSAIE
>Slin_1850_HK_Classic|Spirosoma_linguale_DSM_74|Pair_Slin_1849|HisKA_232-294/Slin_1849_RR_OmpR|Spirosoma_linguale_DSM_74|Pair_Slin_1850|Response_reg_4-113	-QRSFVSHASHELRTPLTALKSEIQLLQRSPEEYEAILQNLLTDTDQLIALSNSLLSLAR----ILIIEDDRRIAQNISRSLRVLGY-STEVAYDGFTGRALGLTGQYELIILDINLPDISGYEICRNIRADHPTLPIIMLTAMGEIEDKIEGLECGADDYIVKPFDLRELSARV-
>Slin_1994_HK_Classic|Spirosoma_linguale_DSM_74|Pair_Slin_1993|HisKA_151-215/Slin_1993_RR_CheY|Spirosoma_linguale_DSM_74|Pair_Slin_1994|Response_reg_8-131	-LQQFAYIASHDLQSPLKTIVNYLTLLESLDTDAVRLINVSTAAAERMRVLINDLLDFSRVG--ILLIDDDPDDNFLHRLVIDSNQCDTVRIVNSGMQALTYLIQTDPDVVFVDINMPGMNGFEFLEEYQKLDGQVVVVMLTTSISFVDRQRAGSLEINVYRTKPLTIAM------
>Slin_2045_HK_Classic|Spirosoma_linguale_DSM_74|Pair_Slin_2044|HisKA_680-747/Slin_2044_RR_CheY|Spirosoma_linguale_DSM_74|Pair_Slin_2045|Response_reg_3-115	-KDDFVSTVTHEIRTPLTSIRALSEILHDDESMRQEFLSRVIRETERLSRLINQVLDLERYDSGVLIVDDEPSILLSLEFLMKKEGY-RVFIARDGDEAFDIIRQEVPDLLLLDVMMARVDGYEVCRFVKQSPQHCKVIFLSAKSKEKDIQKGLDLGADLYIPKPFSTRELIAKVN
>Slin_2168_HK_Classic|Spirosoma_linguale_DSM_74|Pair_Slin_2169|HisKA_592-654/Slin_2169_RR_CheY|Spirosoma_linguale_DSM_74|Pair_Slin_2168|Response_reg_9-123	-LEQFAYIASHDLQEPLRKIQQFGDLLKSPSSEENAYLERMQAAASRMSRLIKDLLAFSRI---VWVVDDDADDQFLLELAFQHPPI-GIKQLYDGDELLPHLEKATPKLILLDLNMVRQNGFDTLRALREAAAHLPVIILTTSSAETDRTQSQQLKADGFLTKPLTNDDTVSML-
>Slin_2489_HK_Classic|Spirosoma_linguale_DSM_74|Pair_Slin_2490|HisKA_271-335/Slin_2490_RR_OmpR|Spirosoma_linguale_DSM_74|Pair_Slin_2489|Response_reg_4-114	-RRELVASISHDLRTPITAIHGYADALTTPEDTRHQYADVIAQGSKKLIIMVDELAELAKLEA--LLIEDDPDVARLIHDHLHQLPG-ELTTTELGNEGLELLAMQPFDICILDLLLPDASGFEICRRIRQRHPAVPLLILSGRAEERDKVTGLEAGADDYLTKPFSVPELLARL-
>Slin_2618_HK_Classic|Spirosoma_linguale_DSM_74|Pair_Slin_2619|HisKA_236-300/Slin_2619_RR_OmpR|Spirosoma_linguale_DSM_74|Pair_Slin_2618|Response_reg_3-113	-QRSFIAQASHELRTPLTTIKGWLETSYDDADSLKRGMAQAVKELDKLTALSNGLLQLARIDS-ILLVEDEVSLASFIRKGVESEGY-EIDLAYDGLVGQSLADNKTYDVIVLDVNLPHINGFELCRHIKREMPRQSVMLLTALDSLPDKESGFGAGADDYLVKPFEFRELMLRI-
>Slin_2719_HK_Classic|Spirosoma_linguale_DSM_74|Pair_Slin_2718|HisKA_240-307/Slin_2718_RR_CheY|Spirosoma_linguale_DSM_74|Pair_Slin_2719|Response_reg_11-129	-LERFAFVASHDLQEPLRKIQSFSNLITEFDADSMLFMSKISNSAERMSKLIKDLLNFSRIS--ILLVDDDEDDRYLTREAFHHYPASRISFAEDGEDLLDFLRYEGPELILLDLNMPRKDGREALREIKANDRHIPIVVLTTSDAKDDIETSYFNGANSFITKPPTFQRLSE---
>Slin_2930_HK_Classic|Spirosoma_linguale_DSM_74|Pair_Slin_2929|HisKA_227-291/Slin_2929_RR_OmpR|Spirosoma_linguale_DSM_74|Pair_Slin_2930|Response_reg_8-118	--KSFVSHASHELRTPLTVMMGQIEVTRLTTEEYEVAFDALLDEVKSMIRLVNGLLELARAN--ILVVEDEPKLASFVKKGLEEQSC-EVDVAYDGQVGRNMALNNLYDVIVLDINLPKMNGFDVVQSIRQEKNRTPVLMLTAMGSVDDKLTGFEAGADDYLVKPFEFRELMARL-
>Slin_2945_HK_Classic|Spirosoma_linguale_DSM_74|Pair_Slin_2944|HisKA_232-298/Slin_2944_RR_OmpR|Spirosoma_linguale_DSM_74|Pair_Slin_2945|Response_reg_3-113	SQRSFVAHASHELRTPLTNTLGTLETSIRNPADWRDSMVIAVEELKKVIALTNGLLGLAKVT--ILLVEDEERLASFIRKGISAEGY-EVEVAHDGRTGLSLFRRDIYDIIILDVNLPHMNGFDLCRHIRSENEAVPVLMLTALDSMADKSDGFNAGADDYLAKPFEFQELLLRL-
>Slin_3453_HK_Classic|Spirosoma_linguale_DSM_74|Pair_Slin_3454|HisKA_222-286/Slin_3454_RR_OmpR|Spirosoma_linguale_DSM_74|Pair_Slin_3453|Response_reg_3-113	-QRNFFGAAAHELRTPLTIMKTGLEVTLDVDESLKPFLAGQLDEVSRLSRLLDEFLTLSRPE--ILVIEDERKLARFIKQGLEQHGH-VADLTYSGSEGLDHIAGGLYDLVLLDLMLPGQTGFEVLQNLRAFGLTVPVMILSALSDPERVVQGLDLGAVDYLRKPFDFNELLARIR
>Slin_3554_HK_Classic|Spirosoma_linguale_DSM_74|Pair_Slin_3553|HisKA_313-380/Slin_3553_RR_unclassified|Spirosoma_linguale_DSM_74|Pair_Slin_3554|Response_reg_4-116	-KSRFVAMASHEFRTPLTAVLTSATLIEKQQDKREKHLMRIRASVNHLNDILEEFLSVGKLEEGILLIEDNEAIRENTAEILELTGY-TVETAENGKLGVEKALARKPDLVICDIMMPVLDGYGVLHIFNKNPSGVPFIFLTAKTERNDLRKGMELGADDYLTKPFDESELLSAIE
>Slin_4554_HK_Classic|Spirosoma_linguale_DSM_74|Pair_Slin_4553|HisKA_209-274/Slin_4553_RR_OmpR|Spirosoma_linguale_DSM_74|Pair_Slin_4554|Response_reg_3-113	-QKQFAENASHELQTPLAVASAELDFLLQLTENDYAHLQRATDALGRLSQLNRSLLLLTQVEN-ILLIEDEPALQTAVQHYLESEGY-AVTTATTFAEAAEKINDYDYDCVVVDLMLPDGNGLDLVRALKQRQSTAGIIVVTAKDALADKLTGLDAGADDYLTKPFHLPELNARL-
>Slin_4794_HK_Classic|Spirosoma_linguale_DSM_74|Pair_Slin_4793|HisKA_232-296/Slin_4793_RR_OmpR|Spirosoma_linguale_DSM_74|Pair_Slin_4794|Response_reg_3-113	-QRMFVANVSHELKNPLTQISSQLEVLRREPEAYRQTIRSVLDDVRELAGLTHELLQLSQV----LVVEDEPKTLHAIQQGLEESQF-EVDIAYDGLLAKRLALKNTYAAIITDLILPGLNGYELCRQLRAEGVSTPILMLTALDETEDRIQGFDAGADQYLAKPFQFAELLARVR
>Slin_5388_HK_Classic|Spirosoma_linguale_DSM_74|Pair_Slin_5387|HisKA_393-476/Slin_5387_RR_OmpR|Spirosoma_linguale_DSM_74|Pair_Slin_5388|Response_reg_4-114	-KNDFINNMTHEFKTPISTISLAVEMAQELAGRLSRYMGIIRDETRRLGSHVEKVLQMALLDRGILLVEDDPNLGQLVQEYLTMKGY-PTDRAIDGNQGLQLFMAGKYDLCIFDVMMPKKDGFTLAKEVRMDHRDVPIIFLTAKSMQEDTIQGFKAGADDYMTKPFSMEELLLRI-
>Slin_5610_HK_Classic|Spirosoma_linguale_DSM_74|Pair_Slin_5611|HisKA_119-185/Slin_5611_RR_OmpR|Spirosoma_linguale_DSM_74|Pair_Slin_5610|Response_reg_13-125	-RREFLADVSHELKTPIFAAQGFIHTLIDDDERVRDFLSKAAKSLDGLDALVKDLVALSQLETGVLVVDDDADILEMLEYNLSKEGY-DVRTATDGRKALEVARTYMPELVLLDIMMPHLDGIEAGRQLRDIPRQTYILYLTARSEEYSEVAAFDVGADDYITKPIKPRALMSRIN
>GbCGDNIH1_0145_HK_Classic|Granulibacter_bethesdensis_CGDNIH1|Pair_GbCGDNIH1_0146|HisKA_262-326/GbCGDNIH1_0146_RR_OmpR|Granulibacter_bethesdensis_CGDNIH1|Pair_GbCGDNIH1_0145|Response_reg_3-114	-----SNAIAHDLRTPIARVRARLEDALTEDTQLAAAVERAIADLDGVTAIFQGLLRIAEIESGILLVEDDKDVAGFIVKGLREAGH-TVEHRDNGRDGLFMAASENFDAIVLDRMLPGIDGLRLLETLRSQDVNTPVLFLSALSGVDERVKGLKAGGDDYLSKPFAFSELLARV-
>GbCGDNIH1_0185_HK_Classic|Granulibacter_bethesdensis_CGDNIH1|Pair_GbCGDNIH1_0186|HisKA_673-740/GbCGDNIH1_0186_RR_OmpR|Granulibacter_bethesdensis_CGDNIH1|Pair_GbCGDNIH1_0185|Response_reg_6-116	-RGALLTSLSHDLRTPLASILGAASSLHETEQDRRELLLTIREEAERLNRFVANLLDMIRLEAGVLIVDDEPAIRRLLRTTLGTQSW-RITEAASGAGAMQALAEQKPDLVLLDLGLPDMDGLEVLQHIRKTAPTLPVVILSARDNERGKVAAFEMGADDYVTKPFGMAELVARL-
>GbCGDNIH1_0506_HK_Classic|Granulibacter_bethesdensis_CGDNIH1|Pair_GbCGDNIH1_0505|HisKA_218-284/GbCGDNIH1_0505_RR_PrrA|Granulibacter_bethesdensis_CGDNIH1|Pair_GbCGDNIH1_0506|Response_reg_12-122	-MGLLASGAAHELGTPLSTLSVILNDWQHNDAELGDDIIEMQAQVNRCKSIVSDI-LLSS-----LIIEDDATFAKTLRRSFERRGY-RVFHSETQDGIDRALDGNKPSYAVVDLKLSIGSGLECVRILHDRFPDMRIVVLTGFASIATAVEAIKLGACHYLPKPANTDDIIAAF-
>GbCGDNIH1_0738_HK_Classic|Granulibacter_bethesdensis_CGDNIH1|Pair_GbCGDNIH1_0737|HisKA_270-323/GbCGDNIH1_0737_RR_OmpR|Granulibacter_bethesdensis_CGDNIH1|Pair_GbCGDNIH1_0738|Response_reg_23-132	----ILSAIGHDLRTPITRLKLRAEFIDD--E---ELRRRMIADLDELEEMVSATLAFGR----ILIVDDDREIRELLARFLEKNRF-RVTAVRDSREARRAWVNGHFQLLVLDLMLPGEGGLDLARWVRSQS-LVPIVMLTAMGEETDRIVGLEIGADDYVAKPFNPRELLARIR
>GbCGDNIH1_1656_HK_Classic|Granulibacter_bethesdensis_CGDNIH1|Pair_GbCGDNIH1_1655|HisKA_258-316/GbCGDNIH1_1655_RR_OmpR|Granulibacter_bethesdensis_CGDNIH1|Pair_GbCGDNIH1_1656|Response_reg_8-118	-------NIAHDLRTPLTRVRMRLEQARSL-DSAHAAIDLALNGTDRTLSIITALLRIAEIETGVLVIEDDEEVGPSLQSNLLARNY-DTQLAITGTQGLEAATKSGFDVMIVDRMLPELDGLSLIGRLREQNIQTPALVLSALGAVDDRIEGLRAGGDDYLVKPFSLEELVARIE
>GbCGDNIH1_1901_HK_Classic|Granulibacter_bethesdensis_CGDNIH1|Pair_GbCGDNIH1_1900|HisKA_267-318/GbCGDNIH1_1900_RR_OmpR|Granulibacter_bethesdensis_CGDNIH1|Pair_GbCGDNIH1_1901|Response_reg_22-131	-RTQALAAVSHDLRTPIQRLRLRASFLDD-----TEAQTAIEDDLDEMEAMVSSVLA-------ILVVEDDPGMRVLIMRVLRENGF-RTSAVRDGREMWPSIEQLMPDLILMDVMLPGGSGFDLCKALRQSS-QVPIIMVSARGEEMDRVLGLELGADDYIAKPFGKQELLARVR
>GbCGDNIH1_1972_HK_Classic|Granulibacter_bethesdensis_CGDNIH1|Pair_GbCGDNIH1_1971|HisKA_332-397/GbCGDNIH1_1971_RR_OmpR|Granulibacter_bethesdensis_CGDNIH1|Pair_GbCGDNIH1_1972|Response_reg_32-141	--ERFAADVAHEIKNPLSSINSAIETLRRDPAQHKRLMSIIAQDVGRLDRLITDISDASRVDA-IALVDDDRNILTSVSMTLEAEGF-QVRTYTDGESALQGLTTRPVDLAVLDIKMPRMDGMELLQRLRART-ALPVIFLTSKDEEVDQLMGLRLGADDYITKPFSQRLLIERIR
>GbCGDNIH1_2242_HK_Classic|Granulibacter_bethesdensis_CGDNIH1|Pair_GbCGDNIH1_2241|HisKA_268-330/GbCGDNIH1_2241_RR_OmpR|Granulibacter_bethesdensis_CGDNIH1|Pair_GbCGDNIH1_2242|Response_reg_14-124	-RTEMLAGVSHDLRTPLTRLRLAVAMLPSPLEELPEESRAMIADLEDMERMIKAYLAFARGEG-ILVVDDDDRLRRLLSRFLAERGF-RVITAENATIARQTMGFLQPDLIVLDVMMAGEDGLSLTESLRQDGQDVPVILLTARGAPEDRIAGLEAGADDYLAKPFEPDELVARIR
>bgla_2g03640_HK_Classic|Burkholderia_gladioli_BSR3|Pair_bgla_2g03650|HisKA_137-192/bgla_2g03650_RR_OmpR|Burkholderia_gladioli_BSR3|Pair_bgla_2g03640|Response_reg_5-112	--AQWNAAIAHELRTPLTILQGRLQGLADF-KPDDALIRGLLSHVEGLSRLVDDLRIVTLQDS-ILIAEDEPEIAEILDAYLTREGF-RTYRVADGQTALDVQPVLKPDLVLLDVKMPGLDGWAVLTELRRRG-ATPVIMLTAMDQDIDRLQGLRFGADDYIVKPFNPVEVVAR--
>bgla_2g05220_HK_Classic|Burkholderia_gladioli_BSR3|Pair_bgla_2g05210|HisKA_216-280/bgla_2g05210_RR_OmpR|Burkholderia_gladioli_BSR3|Pair_bgla_2g05220|Response_reg_3-113	AQRRFIADAAHELRSPLTALSLQAERLEPLATPAHERVLALRRGLARGSALVEQLLNFARVQ--VLLVEDDGMIGDEMAGALRDASY-AVDWVRDGAAAIASVRAQRYDVVLLDLGLPKRDGFQVLAAIRGADNPVPVVVVTARDAVEDRVRGLDNGADDYVLKPFEITELLARIR
>bgla_2g05330_HK_Classic|Burkholderia_gladioli_BSR3|Pair_bgla_2g05320|HisKA_231-293/bgla_2g05320_RR_OmpR|Burkholderia_gladioli_BSR3|Pair_bgla_2g05330|Response_reg_3-113	-QRHFIADAAHELRTPIMGLSIQAQLLGRSEAERLRVIAQIQAGATRLGHLAEQLLTLARLE--VLLVEDDPLIGSGLEEGLRHEGF-AVDWVRDGDAASLALRTTPYGLMLLDLGLPGRDGLSLLSSLRRRDDALPAIVITARDALSDRIAGLDAGADDYLVKPFALEELLARIR
>bgla_2g08420_HK_Classic|Burkholderia_gladioli_BSR3|Pair_bgla_2g08430|HisKA_276-336/bgla_2g08430_RR_NtrC|Burkholderia_gladioli_BSR3|Pair_bgla_2g08420|Response_reg_4-116	ALGKMAAQVAHEIRNPAGAMRLKAENALADETRREAALRMIIGQVGRIETQVGSLLALT-----VLIIDDDEAFREGLAETIQDLGH-RCLEAGSGHDAFAILREHAPDCIFLDFRLPGADGLAVLESLRATERHVPVVMLTAHASSANTIGAMRLGAFEHLTKPVGRDQIAAL--
>bgla_2g09570_HK_Classic|Burkholderia_gladioli_BSR3|Pair_bgla_2g09560|HisKA_267-335/bgla_2g09560_RR_OmpR|Burkholderia_gladioli_BSR3|Pair_bgla_2g09570|Response_reg_7-117	-RRELVANLSHDLRTPLTSLHGYLETLKDETAERERYLSVALVQSEKVGRLARALFELARLESGILIVEDDADIAEVLALHLRDERY-EVVHCANGDDGLRRLEQGNWDALILDLMLPGVDGLEICRRARAMERYTPIIIISARSSEVHRILGLELGADDYLAKPFSMLELVARV-
>bgla_2g10890_HK_Classic|Burkholderia_gladioli_BSR3|Pair_bgla_2g10880|HisKA_543-604/bgla_2g10880_RR_OmpR|Burkholderia_gladioli_BSR3|Pair_bgla_2g10890|Response_reg_3-114	-----LRHMAHDLRNPLSTMLSLLEARGMGKGEAPDLIADLHQLVDYSLRVAQDFTQLSRAEH-VAILEDVVAQANFVAAWLEKAGH-QPLVRHGGDSFVELVSRERVDLLLLDWDVPGKSGIEVMRWVREQFAQLPIVMMTQHDGEDDIVHGLDNGADDYLVKPLRERELVARVN
>bgla_2g14620_HK_Classic|Burkholderia_gladioli_BSR3|Pair_bgla_2g14630|HisKA_234-301/bgla_2g14630_RR_OmpR|Burkholderia_gladioli_BSR3|Pair_bgla_2g14620|Response_reg_3-112	-LESFNADVAHELRTPVSILIGQTQVALTSVERMQRTLQSNLEEFERLRVIVNDMLFLSRSDRGVLIVEDEPKVVDYLKSGLSEEGW-VVDTATDGEDGAWKAVEYDYDVVVLDVMLPKIDGFGVLRALRAQK-DTPVIMLTARDRVDDRVRGLRGGADDYLTKPFSFLELIERL-
>bgla_2g16050_HK_Classic|Burkholderia_gladioli_BSR3|Pair_bgla_2g16060|HisKA_231-270/bgla_2g16060_RR_OmpR|Burkholderia_gladioli_BSR3|Pair_bgla_2g16050|Response_reg_9-120	--MQILAAISHDLQTPITRMRLRVDVMDDLRQDLTEYARTVHSTSED-----------------VLIVDDDRGIRELVGQYLEKNSI-RVSLAANGREMRATLEYGAPDLIVLDVMMPGDDGLVLCRELRAGKRSVPVVMLTARDEETDRIVGLEMGADDYLTKPFAVRELYARIR
>bgla_2g19470_HK_Classic|Burkholderia_gladioli_BSR3|Pair_bgla_2g19460|HisKA_246-308/bgla_2g19460_RR_OmpR|Burkholderia_gladioli_BSR3|Pair_bgla_2g19470|Response_reg_3-111	--RTFTADAAHELKTPLAAIKIQAQLAFASAALRQQALQRVIQGVDRSARLAEQLLLLARLDE--LLVEDDDLIGSGLEISLRQAGY-EVDWLRDGIAAQAALATAGYALVVLDLGLPGKSGSALLRMLRARGDTIPVLVITARGTVADRVRGLDEGADDYLAKPFDLSEVLAR--
>bgla_2g22390_HK_Classic|Burkholderia_gladioli_BSR3|Pair_bgla_2g22400|HisKA_217-271/bgla_2g22400_RR_OmpR|Burkholderia_gladioli_BSR3|Pair_bgla_2g22390|Response_reg_8-117	----MLAGLAHDLRAPITRMQVRADLLPD-----AATRAGFLRDSEALSRIVTQFLDFAREGS-VLLIDDDAALRDLLRTFFQQRGI-EISVLHDATTLERRLERERPSVIVLDLMLPGVDGLTVLKQLRASGDPIPVIMLTARADGVDRVIGLELGADDYLGKPFMPQELLARI-
>bgla_2g23260_HK_Classic|Burkholderia_gladioli_BSR3|Pair_bgla_2g23270|HisKA_240-304/bgla_2g23270_RR_OmpR|Burkholderia_gladioli_BSR3|Pair_bgla_2g23260|Response_reg_3-113	ARRRFFADAAHQLKTPLAAVQAGVELAQRPAEAARAHLRRAGLAVRQAAKLVQQLLSLSRLES-VLLVEDNPSLAQSLTDALAAARF-AVDHMADGEAADHLLRTQDYALVILDLGLPKLDGLEVLRRLRARRNAVPVLILTAHGSVEDRVRGLDLGADDYLAKPFELTELEARA-
>bgla_2g23560_HK_Classic|Burkholderia_gladioli_BSR3|Pair_bgla_2g23570|HisKA_168-231/bgla_2g23570_RR_OmpR|Burkholderia_gladioli_BSR3|Pair_bgla_2g23560|Response_reg_5-114	-QRDLTNGISHELRTPLARVRFALEILRDSDAERLNALDSIAQDVTELDELIDMSLTYARLE--ILLVEDDNRLSTLITGYLRKHDY-EVETVLDGHAAVPAILSSRPDLVLLDVNLPGKDGFEICREARKHF-DGVIVMVTARDEPYDELLGLEFGADDYVRKPVEPRILLARI-
>bgla_2g24430_HK_Classic|Burkholderia_gladioli_BSR3|Pair_bgla_2g24420|HisKA_209-269/bgla_2g24420_RR_OmpR|Burkholderia_gladioli_BSR3|Pair_bgla_2g24430|Response_reg_3-114	--RLFTADVGHELRTPLMVISSSAELLLDLAEAQRARLRRMQGAAREIDQQLAAYLMLSRG---ILVIEDDPDILANISGHLGNRGY-IVDCAFDGQQGYVLATAHEFDLIVLDLMLPRLDGYSLCRKLREEALETPLIMVTARDTLDDRLQGFDAGADDYLVKPFALAELAARV-
>bgla_2g24560_HK_Classic|Burkholderia_gladioli_BSR3|Pair_bgla_2g24570|HisKA_525-591/bgla_2g24570_RR_CheY|Burkholderia_gladioli_BSR3|Pair_bgla_2g24560|Response_reg_5-127	---GFSYTVSHDLRAPLRHIVGFADLLRELSERGRHFVERIVNSARLGGKLVDDLLAFSRMG--ILLVEDNPDDIELTLIALEKTRLNPVVSVRDGEEALDFLRRQGPAVILLDKKLPKIDGHEVLKSVRADERHIPVVMLTSSREEKDLLRSYDLGVNAYVVKPVAFDDFMAAI-
>bgla_2g27740_HK_Classic|Burkholderia_gladioli_BSR3|Pair_bgla_2g27750|HisKA_225-279/bgla_2g27750_RR_OmpR|Burkholderia_gladioli_BSR3|Pair_bgla_2g27740|Response_reg_17-127	-RAELLAGVSHDIRTPLTKLRMAIAA----PEAFEAPSASAERFVAEIDAIVEQFIDYAR----IIVLDDEAEIRNMLERFLVSHGF-EVRTAKSGPQLEVFLERHPYDLLILDVMMPGEDGLSICRRLRARGETLPILMLTARGDPADRVIGLELGADDYLAKPFVPGELLARV-
>bgla_2g27910_HK_Classic|Burkholderia_gladioli_BSR3|Pair_bgla_2g27920|HisKA_291-357/bgla_2g27920_RR_OmpR|Burkholderia_gladioli_BSR3|Pair_bgla_2g27910|Response_reg_3-112	-LSQFSADLAHDLRTPLNNMRGATEVLGRTAAEYEALLESNLEEYERLSRMIENVLFLARAEH-ILVVEDEPKTGAYLKKGLEESGM-SVDLATDGADGLLLAEEEPYDVIVLDVMLPVLDGWAVLQRLRASK-ATPVLFLTARDDVEDRVRGLELGADDYLVKPFAFVELLARV-
>bgla_1g00600_HK_Classic|Burkholderia_gladioli_BSR3|Pair_bgla_1g00610|HisKA_239-304/bgla_1g00610_RR_OmpR|Burkholderia_gladioli_BSR3|Pair_bgla_1g00600|Response_reg_3-113	-QRKFIADAAHQLRTPLTAVKLHAEQAARDPQQTLTAVHELRAAADRAVRLSNQLLSLARAEPG-LLIEDDRPIARGIQSSLEQAGF-TVDMVHDGIFAEQALAQNRHELVILDLGLPGIDGMTLLSRFRQTNRHTPVIVLTARDELNDRVQGLNSGADDYMLKPFEPAELEARIR
>bgla_1g13520_HK_Classic|Burkholderia_gladioli_BSR3|Pair_bgla_1g13510|HisKA_206-272/bgla_1g13510_RR_OmpR|Burkholderia_gladioli_BSR3|Pair_bgla_1g13520|Response_reg_5-117	MRRDFVANVSHELKTPLTVLSGFLETLRESDEERARYLDMMEQQAGRMRKIVTDLLVLAKLEG-ILVIEDEPAISELISVNLQHAGH-CAIRAYNAEQAQNLISDVLPDLVLLDWMLPGKSGIAFARELRNNEKHIPIIMLTARGDEQDKVLGLEIGADDYVTKPFSPKELMARIK
>bgla_1g16970_HK_Classic|Burkholderia_gladioli_BSR3|Pair_bgla_1g16960|HisKA_242-298/bgla_1g16960_RR_OmpR|Burkholderia_gladioli_BSR3|Pair_bgla_1g16970|Response_reg_3-113	-MQRFIADAAHQMRTPLARLDAQIEMLSNDAARQRARLETLRATCSDVGRLTGQLLN-------ILVVEDDAEIGEAIGSRLTRLGH-AVDLECDGAAASSLLGVESFDLVVLDVMLPSMDGFAILRRLRASGSTTPVLLVTARSAIDDRVSGLGLGADDYLVKPFDYRELDARV-
>bgla_1g24110_HK_Classic|Burkholderia_gladioli_BSR3|Pair_bgla_1g24100|HisKA_235-289/bgla_1g24100_RR_OmpR|Burkholderia_gladioli_BSR3|Pair_bgla_1g24110|Response_reg_12-121	---LMLAGISHDLRTPLARLRLETEM----SPSDQATKDAMVDDIEQMDRIIAAFIDYAR----ILVVDDDPRLRDLLRRYLGEQGF-NVYVAENATAMNKLWVRERFDLLVLDLMLPGEDGLSICRRLRGSNDRTPIIMLTAKGEDVDRIVGLEMGADDYLPKPFNPRELVARI-
>bgla_1g28070_HK_Classic|Burkholderia_gladioli_BSR3|Pair_bgla_1g28080|HisKA_588-657/bgla_1g28080_RR_NarL|Burkholderia_gladioli_BSR3|Pair_bgla_1g28070|Response_reg_12-126	-MGEMASSIAHELNQPLAAINNYCSGTVATAETLLPALEKTAQQALRAGMIVKRIREFVKR---VFVVDDDEAVRDSLRWLLEANGY-RVQCFSSAEQFLDGYQAGQIACLILDVRMSGMSGLELQERLIADNAALPIIFVTGHGDVPMAVSTMKKGAMDFIEKPFDEAELRKLV-
>bgla_1g28250_HK_Classic|Burkholderia_gladioli_BSR3|Pair_bgla_1g28240|HisKA_156-213/bgla_1g28240_RR_NtrC|Burkholderia_gladioli_BSR3|Pair_bgla_1g28250|Response_reg_6-114	---HLIRNLAHEIKNPLGGIRGAAQLLEFERGELREYTQVIIKESDRLQTLVDRLLEPHR----IWIVDDDQSIRWVLEKALARDSF-ATRSFSNVREALAALDHESPQVLVSDIRMPGGSGLELLQAMHERMPGLPVIIMTAFSDLDSAVAAFQGGAFEYLAKPFDVDKAVELI-
>bgla_1g29620_HK_Classic|Burkholderia_gladioli_BSR3|Pair_bgla_1g29610|HisKA_679-776/bgla_1g29610_RR_OmpR|Burkholderia_gladioli_BSR3|Pair_bgla_1g29620|Response_reg_8-117	-RNSLLSAISHDLRTPLTTIVGFSSMLAGPTDREHELVEAIHDEALRMTGIVTNLLDMARLQAGVVLIEDEKQIRRFVRTALEAEGI-AVFDAETGKQGLIETATRKPDLVIVDLGLPDTDGLDVIRELRGWS-ELPVIVLSARTREDEKVAALDAGADDYLTKPFGVSELLARIR
>bgla_1g30990_HK_Classic|Burkholderia_gladioli_BSR3|Pair_bgla_1g31000|HisKA_223-272/bgla_1g31000_RR_OmpR|Burkholderia_gladioli_BSR3|Pair_bgla_1g30990|Response_reg_5-115	----MLAGVAHDLRTPLARMRLRAEMMDD-----ARLRDGVVRDVDSMSHIVDQFLVFANG---ILIVDDDQELRDLLRDYLVRQGM-EVSVLHDAATLEKRLERERPDLIVLDLMMPGVDGLTALRQLRAAGDDIPVIMLTARADDVDRIVGLELGADDYLGKPFNPRELLARA-
>bgla_1g33110_HK_Classic|Burkholderia_gladioli_BSR3|Pair_bgla_1g33120|HisKA_214-276/bgla_1g33120_RR_OmpR|Burkholderia_gladioli_BSR3|Pair_bgla_1g33110|Response_reg_16-121	--KAFVADAAHELRTPLAAVQIQAQLVARDDETRREALADLQSGVTRATRLAEQLLALARSE--ILLVEDDKMIAEGVRKALKADGF-AVDWVQDGEAALTAIGGETYDLMLLDLGLPKRDGVDVLRTLRSRGHALPVLIITARDAVSDRVKGLDAGADDYLVKPFDLDELGAR--
>bgla_1g33450_HK_Classic|Burkholderia_gladioli_BSR3|Pair_bgla_1g33440|HisKA_286-349/bgla_1g33440_RR_OmpR|Burkholderia_gladioli_BSR3|Pair_bgla_1g33450|Response_reg_3-113	-QKRFIADAAHQMKTPLAGLRTQAEFALRVPDEVARSLEQIATSSGQAARLVTQLLALARAEN-ILIAEDDSILADGLTRSLRQSGY-AVDHVKSGVEADTALSMQTFDLLILDLGLPKMPGLDVLRRLRARNSVLPVLILTAADSVDERVKGLDLGADDYMAKPFALNELEARV-
>bgla_1g33580_HK_Classic|Burkholderia_gladioli_BSR3|Pair_bgla_1g33590|HisKA_233-297/bgla_1g33590_RR_OmpR|Burkholderia_gladioli_BSR3|Pair_bgla_1g33580|Response_reg_3-113	MQRRFIADAAHQLRTPLTLLGTQLQYARRDPAQVQDTLKAMHRSNRSLVALTNQLLTLAQAEA--LLVEDNEELAHWLAMTLTDDGF-MLDRVSSGEAAEDALRASAYDVVLLDLNLPGMSGKTVLRRMRERGDATPVLILTATGAVDEKVVCLGAGADDYIVKPFDARELVARIK
>bgla_1g35630_HK_Classic|Burkholderia_gladioli_BSR3|Pair_bgla_1g35620|HisKA_433-495/bgla_1g35620_RR_NtrC|Burkholderia_gladioli_BSR3|Pair_bgla_1g35630|Response_reg_7-117	ALGQMAAGITHELNQPLAALRSFSDNTRVEQAAARDNLEAIASLTERMGKITNQLK--------VIYIEDDELVRRAAVQSLQLAGF-EVAGFGSAEAAEKAILGERVGAVVSDIRLPGASGLELLAQCRERAAEVPVILVTGHGDITMAVQAMRDGAYDFIEKPFATERLIETV-
>bgla_1g38000_HK_Classic|Burkholderia_gladioli_BSR3|Pair_bgla_1g37990|HisKA_203-237/bgla_1g37990_RR_PrrA|Burkholderia_gladioli_BSR3|Pair_bgla_1g38000|Response_reg_7-116	-LGVQAATVAHEMGTPLSTIAMLTEELRDL-ARYDADLKVLDEQMTQCTSALARL----------LVIDDNEVFAGTLARGLERRGY-LVQQAHTRDAALKLASASKFEFITVDLHLGEDSGLSLIAPLCDLQPDARILVLTGYASIATAVQAVKDGADNYLSKPANVESILAAL-
>bgla_1g38260_HK_Classic|Burkholderia_gladioli_BSR3|Pair_bgla_1g38250|HisKA_540-608/bgla_1g38250_RR_PrrA|Burkholderia_gladioli_BSR3|Pair_bgla_1g38260|Response_reg_4-115	-WGEVARRLAHEIKNPLTPIQLSAERLQMDAEVLKRGATTIVNQVAAMKRMVDDFRDYAR----ILVVDDEMGIRELLSEILADEGH-VVEVAENAQAAREYRQRQAPDLVLLDIWMPDTDGVTLLKEWASHGLTMPVIMMSGHATIDTAVEATKIGALDFLEKPIALQKLLKSV-
>BpOF4_10070_HK_Classic|Bacillus_pseudofirmus_OF4|Pair_BpOF4_10065|HisKA_241-307/BpOF4_10065_RR_OmpR|Bacillus_pseudofirmus_OF4|Pair_BpOF4_10070|Response_reg_8-116	MRTDFITNVSHDLRSPLTSIKGFLTALLDADHRKNHYYTIMKNETERLSKLVNDLLDMSQLQHGVLIIEDDPHIAELIQLYMEKLGY-LTQVAYDGEAGLESYYETYPDFIFLDIMLPKIDGWELCQEIRWDNKKIPIIMLTGKGESQDKIKGLDIGADDYVVKPFDPNELVARM-
>BpOF4_11240_HK_Classic|Bacillus_pseudofirmus_OF4|Pair_BpOF4_11235|HisKA_226-291/BpOF4_11235_RR_OmpR|Bacillus_pseudofirmus_OF4|Pair_BpOF4_11240|Response_reg_6-116	-QQRFVSDASHELRTPLTVIESYASLLKRKPDLLEEAVDAIYDESQRMKGLTKQMLALATGE--ILIVEDEANIARVIELELEHEGY-ETEIAADGLSALEQIEQGGWSLILLDVMLPRLSGMEVLRRIRKEGNTTPVIMLTARDTIVDKVMGLDQGANDYVTKPFEIEELLARIR
>BpOF4_11425_HK_Classic|Bacillus_pseudofirmus_OF4|Pair_BpOF4_11420|HisKA_237-302/BpOF4_11420_RR_OmpR|Bacillus_pseudofirmus_OF4|Pair_BpOF4_11425|Response_reg_6-114	-QKTFIQHASHELKTPIMVIKSYAQSVKDPKDNMEQTMNVIIEEANRMERRVVDMLYYTKLDS-VYLVEDEQNLSEVLKAYLEKEGW-EVRVFNDGDAARDAIEDK-PHLWILDIMLPGTDGYQLLKGIKENG-DTPVIFISARDQDLDRVLGLEMGSDDYLAKPFLPQELIIR--
>BpOF4_12325_HK_Classic|Bacillus_pseudofirmus_OF4|Pair_BpOF4_12320|HisKA_236-296/BpOF4_12320_RR_OmpR|Bacillus_pseudofirmus_OF4|Pair_BpOF4_12325|Response_reg_16-125	-KQKLIAAISHDLRTPLTSIKAYAEGLAHHPEKQEEYRDVIIRKANYMEKLVEDLLLYSRLE--ILVIEDDREISKILNEYLIREGY-KVVMAHDGEDGLRRFASIHPHLLLVDLMLPKVDGFEVCRQVRQQS-EVPIIVVSARQSDIDKIHSLGLGADDYITKPFSPLELVARVK
>BpOF4_12970_HK_Classic|Bacillus_pseudofirmus_OF4|Pair_BpOF4_12975|HisKA_146-206/BpOF4_12975_RR_OmpR|Bacillus_pseudofirmus_OF4|Pair_BpOF4_12970|Response_reg_5-116	SRDQMLTNMAHDLRTPLSNINGYLEAMKDVIKGDKDIFSSLHKESDRLIHMINQLQEMSKW---VLVVEDDDMIRDLIDIYLKKEGY-DVILAADGETAKEQFLKYSPCLVILDLMLPKISGEEVCQWIRAQENEVSIIMVTAKTSSDHKISGLKMGADDYVTKPFSPNELMARIE
>BpOF4_14190_HK_Classic|Bacillus_pseudofirmus_OF4|Pair_BpOF4_14195|HisKA_242-308/BpOF4_14195_RR_OmpR|Bacillus_pseudofirmus_OF4|Pair_BpOF4_14190|Response_reg_4-113	-KQTFLSNVSHELRTPLSYVKGYSEVLLELREDQKEFVSIIHNESDRLSKLVNDLLDLAKIQG-ILIVEDERTMQRLLTLHLTKEGF-ETITADHGEEAISLLSSHQIDLAVVDVMMPVMDGFDFVKKLRETS-TLPVIFLTARSDEKDRIEGLMLGGDDYLSKPFSKGELIARIQ
>BpOF4_15065_HK_Classic|Bacillus_pseudofirmus_OF4|Pair_BpOF4_15060|HisKA_367-433/BpOF4_15060_RR_OmpR|Bacillus_pseudofirmus_OF4|Pair_BpOF4_15065|Response_reg_7-116	-RKDFIANVSHELRTPVSMLQGYSEAIIDSEEDKKEFAKIIYDESLRMGRLVNELLDLARMEAGILVVDDEDRIRRLLKMYLERENY-EVEEAENGEKALSLALEIDYDLILLDIMMPGMDGIEVCQELRKTK-ATPVMMLTAKGEEANRVQGFEVGTDDYIVKPFSPREVVLRV-
>BpOF4_18480_HK_Classic|Bacillus_pseudofirmus_OF4|Pair_BpOF4_18485|HisKA_238-304/BpOF4_18485_RR_OmpR|Bacillus_pseudofirmus_OF4|Pair_BpOF4_18480|Response_reg_4-114	-RQQFLTNISHDLRTPLTYIKGYSALLKDEPPVVKEQSNIIYQEASRMEHLVQDLFHLMKYEEGILIIDDEREMQKLLELCIQSSSY-DIRTLSSAIEAEFYLNKEDIHLILLDIMMPEMTGFEFLKLINELQKEIPVILITAMDDTEAVVKGLELGAYDFITKPFEPRELKARVQ
>BpOF4_02415_HK_Classic|Bacillus_pseudofirmus_OF4|Pair_BpOF4_02410|HisKA_437-502/BpOF4_02410_RR_NtrC|Bacillus_pseudofirmus_OF4|Pair_BpOF4_02415|Response_reg_4-113	ALSRVVAGIAHEIRNPLTSIKTFAELIKKNERFQREISTYVPKEIDRVNQLIEGLIDYARP---IVIIDDEASICSSLTFALE-DDY-HVEAMTDPEEGKKRIDSILPDLVLLDLKIGAVDGLNVLEEIKGTHPSIVVIMITAYGTISSSVEALQKGAYSYLTKPINMDELQTVI-
>BpOF4_03345_HK_Classic|Bacillus_pseudofirmus_OF4|Pair_BpOF4_03350|HisKA_363-428/BpOF4_03350_RR_OmpR|Bacillus_pseudofirmus_OF4|Pair_BpOF4_03345|Response_reg_5-115	-RKDFVANVSHELKTPVTSIKGFSETLLDDPAYMEKFLTIIHKESERLQSLIQDLLELSKLEQ-ILVVDDEESIATLLQFNLEQSGF-EVTVASDGEEGLALAKDEPFDLLILDLMLPKIDGLDICKQLRQNKKMTPILMLTAKDDEFDKVLGLELGADDYMTKPFSPREVVARV-
>BpOF4_06200_HK_Classic|Bacillus_pseudofirmus_OF4|Pair_BpOF4_06195|HisKA_240-306/BpOF4_06195_RR_OmpR|Bacillus_pseudofirmus_OF4|Pair_BpOF4_06200|Response_reg_6-115	-RTQLFVDISHELRTPLTYFKGYVEILLNSEEDKVKYLTLLYKQSGRLQRLIQDLFDLSTMEQ-ILIVEDEAPMRELLQLYLRKEGY-VVDEAITGIEALEKVEKTLYSVVLLDVMMPEMDGFEVCREIRKVS-QVPVIMLTARTQTLDKVKGLKIGADDYLTKPFEQEELLARVE
>BpOF4_07825_HK_Classic|Bacillus_pseudofirmus_OF4|Pair_BpOF4_07830|HisKA_377-442/BpOF4_07830_RR_OmpR|Bacillus_pseudofirmus_OF4|Pair_BpOF4_07825|Response_reg_5-114	-RREFVANVSHELRTPLTTMKSYLEALEDEPELARRFVGVTQNETERMIRLVNDLLQLSKIDS-ILVVDDEKPIADILKFNLEKEGF-EVFCAYDGNEAVEQVKKEEPDLILLDIMLPHKDGMEVCREVRKSY-DIPIIMLTAKDSEIDKVLGLELGADDYVTKPFSTRELLARVK
>AEQU_0126_HK_Classic|Adlercreutzia_equolifaciens_DSM_19450|Pair_AEQU_0127|HisKA_168-214/AEQU_0127_RR_OmpR|Adlercreutzia_equolifaciens_DSM_19450|Pair_AEQU_0126|Response_reg_5-115	----------HEIKTPIAAIKLMLANNPGESAK-------VARELERIEAQVDQAL--------IYLIEDDTALRAELAHVLELSGYAVAAEGTWGDTAARALAAE-PDCIVLDLKLPGADGHSICRDIRAKS-SVPILMLTSSESEFDEVMAMNLGADDYVTKPYRPAVLLAHL-
>AEQU_0183_HK_Classic|Adlercreutzia_equolifaciens_DSM_19450|Pair_AEQU_0182|HisKA_336-397/AEQU_0182_RR_OmpR|Adlercreutzia_equolifaciens_DSM_19450|Pair_AEQU_0183|Response_reg_4-114	-KNEFFAIVSHELRTPLTSILAYARILNALAPKTREAVGEIESNATLLLNMVNNILVISKH---ILLVDDEPRIARVVRDMVEGADW-QFAYADNGADALDAVAREAPDLIIMDVMMPKMDGFTACRELRARGVTVPVIFLSAKGDIVDKGVGFAAGGDDYMVKPFDPRELMMHI-
>AEQU_0448_HK_Classic|Adlercreutzia_equolifaciens_DSM_19450|Pair_AEQU_0449|HisKA_403-466/AEQU_0449_RR_OmpR|Adlercreutzia_equolifaciens_DSM_19450|Pair_AEQU_0448|Response_reg_22-131	-KNELVAYLAHDIRTPLTSVLGYLDLLREPRETLRKYADIAYSKAERLESLINEFFEITR----ILVVDDEQAIADLVVNLLVAEGM-DALACYSGQAALDMLARTPFDLAIVDIMMPGIDGFELCVRMRQMR-DIPVIFLSAKDEEADQVVGFTLGAEDYVTKPFRPRELVARVK
>AEQU_0771_HK_Classic|Adlercreutzia_equolifaciens_DSM_19450|Pair_AEQU_0770|HisKA_254-321/AEQU_0770_RR_OmpR|Adlercreutzia_equolifaciens_DSM_19450|Pair_AEQU_0771|Response_reg_4-114	AKTDFLTLVSHELKTPLSSIIAFADIWQSRPPDEQYLVEEVRDNSKVLLGMVNNIIDMARVESGVLIVDDDKSLRSALSIMLGNAGY-ATSEAKDGIEALKSFDDQHPDLVIMDIMLPRLNGIEACSVIRKMSPEVPLLFLSAKNTISDKAAGFHSGGDDYLTKPFSQKELLLRV-
>AEQU_1211_HK_Classic|Adlercreutzia_equolifaciens_DSM_19450|Pair_AEQU_1210|HisKA_369-435/AEQU_1210_RR_OmpR|Adlercreutzia_equolifaciens_DSM_19450|Pair_AEQU_1211|Response_reg_4-114	-KSDFLAIVSHELRTPLTSILAFAELLGEGRPEARRQLEEIGKNGAILLEMVDNVLECARIQAGVMLVDDDASMQVLIEQIVRRGGY-DFCCAGNGADGLEMLRAERPDFLILDVMLPDINGFEICEIVRGEGRKVPIMFLTAKGDIVDKSIGFKAGADDYLVKPFQPEELLLRL-
>AEQU_1604_HK_Classic|Adlercreutzia_equolifaciens_DSM_19450|Pair_AEQU_1603|HisKA_689-756/AEQU_1603_RR_OmpR|Adlercreutzia_equolifaciens_DSM_19450|Pair_AEQU_1604|Response_reg_12-122	-RSNLLRAISHDLRTPLTSISGDADMLLALDEAQRKLTSDIHEDANWLINLVENLLSVTRLDDGILVVEDDPAVRNLVTCALDVHGY-RSREASTATAALADLCARDVNLVILDLGLPDRDGTEVIGAVRGWS-RVPIIVLSARQEDADKVTALDAGADDYLTKPFSVAELLARVR
>AEQU_1798_HK_Classic|Adlercreutzia_equolifaciens_DSM_19450|Pair_AEQU_1797|HisKA_338-403/AEQU_1797_RR_OmpR|Adlercreutzia_equolifaciens_DSM_19450|Pair_AEQU_1798|Response_reg_4-114	-KSDLLSMVNHELRTPLTSIITLAQIALEADAEERRSWEEVRKSSSVLLGMINDMLDIARSDAGVMLIDDEKSLHMAIEKLLTKSGY-EYCGATDAESGLEMLATEKPDLLLLDVMLPGMNGFDLCTRIRAEERRIPIIFLSAKNDIVDKSIGFRAGGDDYVTKPFDATELILRI-
>AEQU_1859_HK_Classic|Adlercreutzia_equolifaciens_DSM_19450|Pair_AEQU_1860|HisKA_109-174/AEQU_1860_RR_OmpR|Adlercreutzia_equolifaciens_DSM_19450|Pair_AEQU_1859|Response_reg_3-113	-LADSLADVSHQIRTPLTAITLMLPVVERDARERKRAVRELESMIERVSWLVTTLLKIAKVDAGILLVEDDHAIVRALTDLLEGEGF-VVRSCATQDGACAALAADDFDIALLDVTLAQGNGFAVCAAAREAAPDMPVIFLTASDDEYSTVAGLDMGAVDYIAKPFRARELISRIR
>AEQU_1891_HK_Classic|Adlercreutzia_equolifaciens_DSM_19450|Pair_AEQU_1890|HisKA_307-370/AEQU_1890_RR_OmpR|Adlercreutzia_equolifaciens_DSM_19450|Pair_AEQU_1891|Response_reg_3-113	-QQQFIADASHELKTPLTVILANNAILRQTIASQRQWIESTQMEAERMQGLVTDMLDLAR----VLVVEDDARLAEALARILQDNGY-ATDVVHDGEAGVQYGGTGTYDVIILDVMLPKADGFTVAQRLRRAHVSTPILLLTARDAISDKICGYDSGADDYMTKPFSPAELLAHL-
>AEQU_2007_HK_Classic|Adlercreutzia_equolifaciens_DSM_19450|Pair_AEQU_2008|HisKA_276-337/AEQU_2008_RR_OmpR|Adlercreutzia_equolifaciens_DSM_19450|Pair_AEQU_2007|Response_reg_8-115	--RRLTTDVAHELRTPLMAIQATVEAMIDY-EADEERLVTVNSEIQRLSRLVNALLKLSRLEN-ILLVEDEKAIRDAVTAYLERENY-WVTAVGDGQDALEEFQKHHFDLVILDLMLPRVPGERVCRVIRDTS-DVPIIMLTAKGEVEDRIIGLELGADDYLVKPFSPRELVAR--
>AEQU_2126_HK_Classic|Adlercreutzia_equolifaciens_DSM_19450|Pair_AEQU_2125|HisKA_245-311/AEQU_2125_RR_OmpR|Adlercreutzia_equolifaciens_DSM_19450|Pair_AEQU_2126|Response_reg_8-117	-QSNFLTIITHELKTPLSSILAFTELWKEDSPESRVLVNEVETNARVLLAMIDNVLDAAKLEAGILIADDDSSSSSAIEKMLAKDGH-RCLRATNGQEALRLFRDSQPDLIILDVMMPVLDGFQVCERIREHDRITPVLFLTAKGDIVDKRIGYGIGGDDYLVKPFSGEELRLRV-
>AEQU_2164_HK_Classic|Adlercreutzia_equolifaciens_DSM_19450|Pair_AEQU_2163|HisKA_321-387/AEQU_2163_RR_OmpR|Adlercreutzia_equolifaciens_DSM_19450|Pair_AEQU_2164|Response_reg_7-117	-KSDFLSMVSHELRTPLTSIVAFADLLSKADENEAKALAGIEANSQALMLMINDILEMSRLDAGVMLIDDDPGIHESLRAVIEEAGY-EFCGALGGREGLRLLDDERPDLLLLDVMMPGMNGFDVCQQMREEGRRIPVIFLTAKNDIVDKSTGFKAGADDYVTKPFIADELLLRI-
>AEQU_2196_HK_Classic|Adlercreutzia_equolifaciens_DSM_19450|Pair_AEQU_2197|HisKA_49-114/AEQU_2197_RR_OmpR|Adlercreutzia_equolifaciens_DSM_19450|Pair_AEQU_2196|Response_reg_10-119	MRREFSANVSHEMKTPLQVISGYAELMANPPEDVPRFAQLIYEESQAMRALIDDVLILSRLDE--YYVEDDEHIRDLTAYALHQAGM-EVRAFHDGDGLVERCAVEPPDAVLLDIMLPGDDGLVLLQALRGNAENLPVMMLTAKGTEFDKVVGLDAGADDYLAKPFGMMELISRVN
>BAB2_0763_HK_Classic|Brucella_melitensis_biovar_Abortus_2308|Pair_BAB2_0762|HisKA_264-320/BAB2_0762_RR_OmpR|Brucella_melitensis_biovar_Abortus_2308|Pair_BAB2_0763|Response_reg_7-116	-REQLAAALAHDLRTPLTRMKLRMELLDDLRQSLSRDLNDIEEISR------------------ILIVDDDKDIRDLLHEFLKRRGM-HVSIACNGDEMLDVLSRTPIDLVILDVMLPGKSGIEICQDVRRTS-RVPIIMLTAIADAADKILGLEIGADDYIAKPFDPRELLARIR
>BAB1_0629_HK_Classic|Brucella_melitensis_biovar_Abortus_2308|Pair_BAB1_0628|HisKA_224-279/BAB1_0628_RR_OmpR|Brucella_melitensis_biovar_Abortus_2308|Pair_BAB1_0629|Response_reg_3-113	---TQVGNLAHSLKTPLSVLVNEARAMGGM-----QYLQRARIAA-------------------ILIVEDDKDLNRQLSEAMIAAGY-VVDSAYDGEEGHYLGDTEPYDAVVLDIGLPQMDGISVVERWRRSGRTIPVLMLTARDRWSDKVAGIDAGADDYVAKPFHIEEVLARL-
>BRA0041_HK_Classic|Brucella_suis_1330|Pair_BRA0042|HisKA_130-197/BRA0042_RR_NarL|Brucella_suis_1330|Pair_BRA0041|Response_reg_11-121	-LGQLTSSIAHEVSQPLVAIEISASAGRRNNERAAAAIERISADSHRAIEILDRVRRLSRGE--VFIVDDDHSVRLGLVDLFASIGL-KALCFASVNEFLKHAREEVPACLILDVRMPGESGTEFHARMKGLDIRLPVIFITGHGDIAMGVKAIKDGAIDFLAKPFRNQDLLDAVQ
>BRA0473_HK_Classic|Brucella_suis_1330|Pair_BRA0474|HisKA_264-320/BRA0474_RR_OmpR|Brucella_suis_1330|Pair_BRA0473|Response_reg_7-116	-REQLAAALAHDLRTPLTRMKLRMELLDDLRQSLSRDLNDIEA---------------------ILIVDDDKDIRDLLHEFLKRRGM-HVSIACNGDEMLDVLSRTPIDLVILDVMLPGKSGIEICQDVRRTS-RVPIIMLTAIADAADKILGLEIGADDYIAKPFDPRELLARIR
>BR0605_HK_Classic|Brucella_suis_1330|Pair_BR0604|HisKA_224-279/BR0604_RR_OmpR|Brucella_suis_1330|Pair_BR0605|Response_reg_3-113	---TQVGNLAHSLKTPLSVLVNEARAMGGM-----QYLQRARIAA-------------------ILIVEDDKDLNRQLSEAMIAAGY-VVDSAYDGEEGHYLGDTELYDAVVLDIGLPQMDGISVVERWRRSGRTMPVLMLTARDRWSDKVAGIDAGADDYVAKPFHIEEVLARL-
>BR1522_HK_Classic|Brucella_suis_1330|Pair_BR1521|HisKA_228-284/BR1521_RR_OmpR|Brucella_suis_1330|Pair_BR1522|Response_reg_22-131	-RTAMLSGVSHDLRTILTRFKLQLALAGHDTEPLNQDIADMQ-----------------------LVVDDDTRIRSLLSQYLTNSGF-RVTMAGSAAEARRKLEGIDFDLLILDVMMPGETGVSLTRSLREQK-NVPILMLTALSETDSRIDGLAAGADDYLPKPFDPRELTLRI-
>BR2091_HK_Classic|Brucella_suis_1330|Pair_BR2090|HisKA_364-429/BR2090_RR_OmpR|Brucella_suis_1330|Pair_BR2091|Response_reg_10-119	---SFAADVSHELKNPLTSLRSAVETLLATDESRKRLLDVIQHDVRRLDRLITDISDVSRLDA-IALVDDDRNILTSVSIALESEGY-RVETYTDGASALDGLMARPPNLAIFDIKMPRMDGMELLRRLRQKS-DLPVIFLTSKDDEIDELFGLKMGADDFITKPFSQRLLVERVK
>SMULJ23_0603_HK_Classic|Streptococcus_mutans_LJ23|Pair_SMULJ23_0602|HisKA_207-273/SMULJ23_0602_RR_OmpR|Streptococcus_mutans_LJ23|Pair_SMULJ23_0603|Response_reg_4-113	-RRLFVSNVSHELRTPLTSVKSYLEALDDLTESVAPFIKVSLDETNRMMRMITDLLSLSRIDN-ILIVDDEKPISDIIKFNLAKEGY-DTITAFDGREALSKYEEENPDLIILDLMLPELDGLEVAKEVRKNS-HVPIIMLSAKDSEFDKVIGLEIGADDYVTKPFSNRELLARVK
>SMULJ23_0895_HK_Classic|Streptococcus_mutans_LJ23|Pair_SMULJ23_0894|HisKA_228-281/SMULJ23_0894_RR_OmpR|Streptococcus_mutans_LJ23|Pair_SMULJ23_0895|Response_reg_8-118	MKEQWIRGVSHDLRNPLMLISGYTSQLEQY--GHGKQTEQIENQIQNMKEMISNL-NL------ILILDDNPEILEMVQESLSIAGFNNLTSVQSKKEALEQLGKRSFDLAILDIMLPDGSGFEVLREIRKTS-TMPVLFLSAVSDIEKQYQGFELGADDYIVKPFRPKELELRI-
[truncated: 2,926 more rows]
