# Supplementary material for: Energetic Frustration Dictates Cognate Specificity of Two-Component Signaling System
Source: Research Square preprint supplement (doi:10.21203/rs.3.rs-7586528/v1), 2025-10-31
Supplement: Supplementary file 3 [file bcf3f10b281886ac8db9832f.xlsx]

## Sheet: Sheet1
Sample	Sequence
RR463_native	SKKVLLVDDSAVLRKIVSFNLKKEGYEVIEAENGQIALEKLSEFTPDLIVLDIMMPVMDGFTVLKKLQEKEEWKRIPVIVLTAKGGEEDESLALSLGARKVMRKPFSPSQFIEEVKHLLN
RR463_Tuned_17	SKKVLLVDDSAVLRKKVSFNLKKEGYEVIEAENGQIALEKLSEFTPDLIVLDIMMPVMDGFTVLKKLQEKEEWKRIPVIVLTAKGGEEDESLALSLGARKVMRKPFSPSQFIEEVKHLLN
PhoB_native	ARRILVVEDEAPIREMVCFVLEQNGFQPVEAEDYDSAVNQLNEPWPDLILLDWMLPGGSGIQFIKHLKRESMTRDIPVVMLTARGEEEDRVRGLETGADDYITKPFSPKELVARIKAVMR
PhoB_Tuned_To_RR463_17	ARRILVVEDEAPIREIVCFVLEQNGFQPVEAEDYDSAVNQLNEPWPDLILLDWMLPGGSGIQFIKHLKRESMTRDIPVVMLTARGEEEDRVRGLETGADDYITKPFSPKELVARIKAVMR
PhoP_native	SQKVLVVDDEHSIVTLLKYNLETAGYEVVVAFDGDEALEKVENEQPDLIILDVMLPKKDGIDVCKTVRTNK--NLVPILMLTAKNDEFDRVLGLELGADDYMTKPFSPREVVARVKAILR
PhoP_Tuned_To_RR463_17	SQKVLVVDDEHSIVTILKYNLETAGYEVVVAFDGDEALEKVENEQPDLIILDVMLPKKDGIDVCKTVRTNK--NLVPILMLTAKNDEFDRVLGLELGADDYMTKPFSPREVVARVKAILR
mpnn_1	MKKILLVDDSETLRKIISFALESRGYEVVLAKDGVEALEKLKKFTPDLIIVDLSMPKMNGFELLKILKENEKLKNIPVVVLSLDSDPEVKKKCLELGANKYIEKPFSIEELMKEVEKLLN
mpnn_2	MKSVLLVDDSETLSKIIKFVLEKKGYKVILAPNGIEALEKLKEFTPDLIIVDLRMRPMNGFELLKILKNDEKLKNIPVIVLSLDRDPEVEKKALELGANAYVPKPFSPKELMEIVEKLLN
mpnn_3	MKSILLVDDSETLRKIISFALEKEGYTVTFAPNGKEALEKLEKETPDLIIVDLRMRPMNGFELLKKLKEDEKLKKIPVVVISADRDPEVEKKALELGADKYVPKPFSIEELMKIVKELLN
mpnn_4	MKKVLLVDDSETLRKVITFALESEGYEVVTAKNGIEALEKLKEFTPDLIICDLNMRPMNGFELLKILKEDEKLKNIPVIVVSGNRDPEVKEKCLKLGADKYIPKPFSISELMEVVKELLN
mpnn_5	MKKILLVDDSETLRKVITFALEKEGYKVVLAPNGKEALEKLEKFLPDLIIVDLRMPPMNGYELLKKLKEDEKLKKIPVIVLSLDRDPEVKERCLKLGANAYVPKPFSIEELMKIAKKLLE
mpnn_6	MKKVLLVDDSETLSKVIKFALEKEGYKVILAKNGIEALEKLEKELPDLIIVDLSMPPMNGYELLKKLKEDEKLKKIPVIVLSGNRDPEVEKKCLELGANKYVPKPFSIKELMEIVKKLLN
mpnn_7	MKKVLVVDDSETMRKVITFALEKEGLEVIEAPNGKEALEKLKKFLPDLIIVDLRMPPMNGFELLKILKEDEKLKNIPVIVLSGDRDEEVKEKCLKLGANKYIPKPFSIEELMEEVKKLLE
mpnn_8	MKSILLVDDSETLRKIITFALEKEGYSVVLAPNGKEALKKLEEFLPDLIIVDLNMPPMNGYELLKKLKNNEELKNIPVIVLSLDRDEEVKEKCLELGADKYVPKPFSISELMKEVKKLLN
mpnn_9	KKSILLVDDSETLSKIIKFALEKEGYSVILAKNGKEALEKLKESLPDLIIVDLRMRPMNGFELLKILKEDEKLKKIPVIVLSADRDPEVEERCLELGANYYIPKPFSIKELMEIVKKLLN
mpnn_10	MKSILLVDDSETLRKIISFALESKGYTVVEAPNGKEALEKLKEFLPDLIIVDLSMPPMNGFELLKILKNDEELKKIPVIVISGNRDEEVKEKALKLGANYYVPKPFSIEELIKIVEKLLN
